# Supplementary material for: Approach to the “Missing” Diarylsilylene: Formation, Characterization, and Intramolecular C–H Bond Activation of Blue Diarylsilylenes with Bulky Rind Groups
Source: MDPI journal article supplement (doi:10.3390/ijms25073761), 2024-03-28
Supplement: s1 [file s1]

## Supplementary Materials

### Approach to the “Missing” Diarylsilylene: Formation, Characterization, and Intramolecular C–H Bond Activation of Blue Diarylsilylenes Having Bulky Rind Groups

Kazuki Mochihara <sup>1</sup>, Tatsuto Morimoto <sup>1</sup>, Kei Ota <sup>1</sup>, Shinsuke Marumoto <sup>2</sup>,  
Daisuke Hashizume <sup>3</sup> and Tsukasa Matsuo <sup>1,\*</sup>

- <sup>1</sup> Department of Applied Chemistry, Faculty of Science and Engineering, Kindai University, 3-4-1 Kowakae, Higashi-Osaka 577-8502, Osaka, Japan  
<sup>2</sup> Joint Research Center, Kindai University, 3-4-1 Kowakae, Higashi-Osaka 577-8502, Osaka, Japan  
<sup>3</sup> RIKEN Center for Emergent Matter Science (CEMS), 2-1 Hirosawa, Wako 351-0198, Saitama, Japan

E-mail: t-matsuo@apch.kindai.ac.jp

(submitted to International Journal of Molecular Sciences)

#### UV-vis spectra of **3a** and **3b**

The solution containing (EMind)<sub>2</sub>Si: (**3a**): Figure S1

The solution containing (Eind)<sub>2</sub>Si: (**3b**): Figure S2

#### NMR spectra of **3b**, **4b**, and **5b**

The solution containing (Eind)<sub>2</sub>Si: (**3b**): Figures S3 and S4

The cyclic hydrosilane (**4b**): Figures S5–S10.

(Eind)<sub>2</sub>SiH(OH) (**5b**): Figures S11–S13

#### IR spectra of **5b**

(Eind)<sub>2</sub>SiH(OH) (**5b**): Figure S14

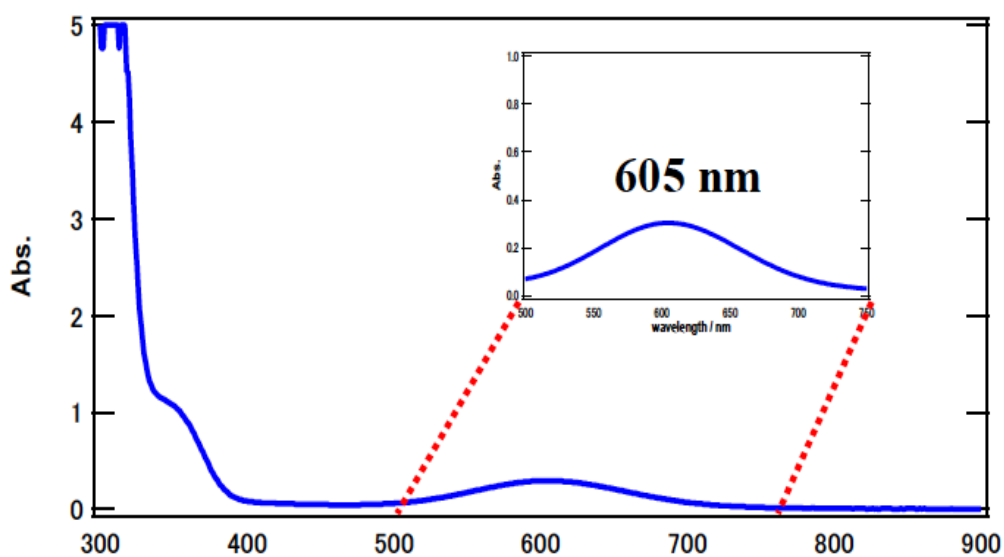

**Figure S1.** UV-vis spectrum of the solution containing (EMind)<sub>2</sub>Si: (**3a**) in toluene at −20 °C.

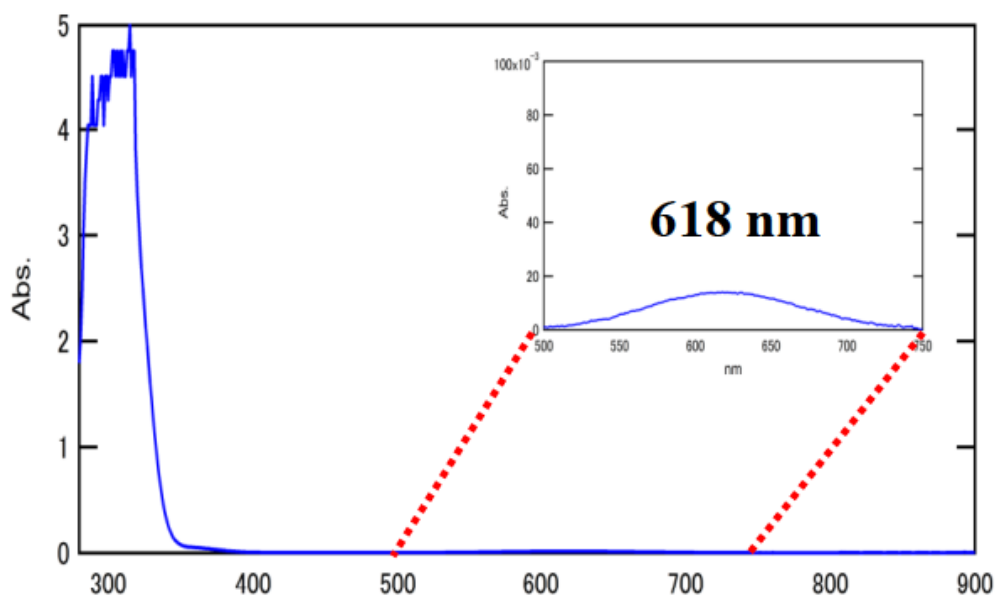

**Figure S2.** UV-vis spectrum of the solution containing (Eind)<sub>2</sub>Si: (**3b**) in toluene at −20 °C.

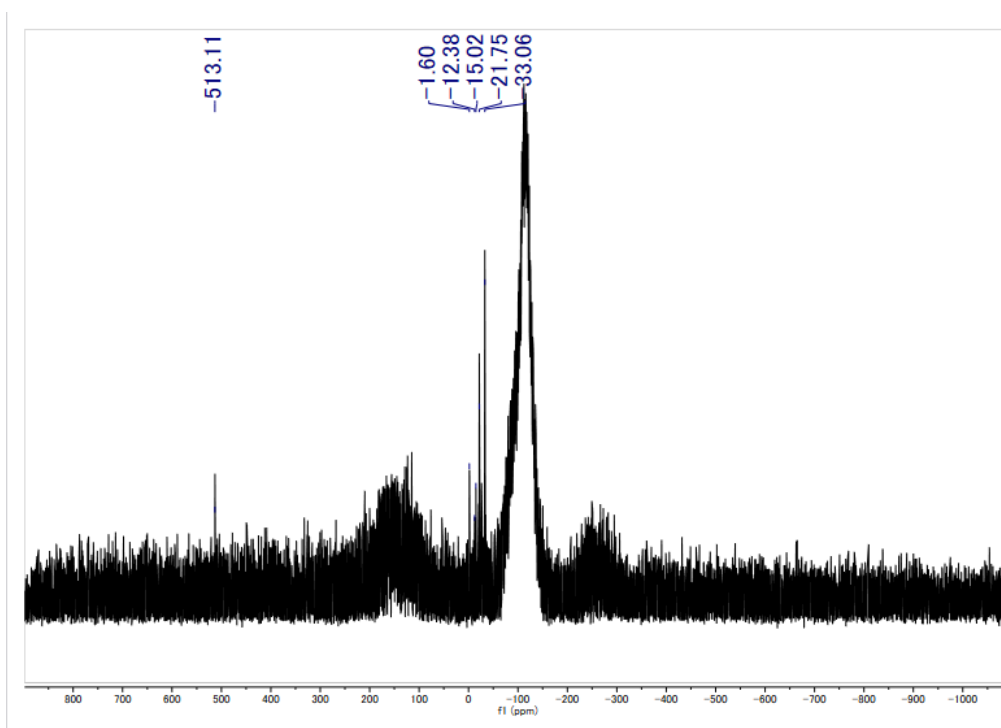

**Figure S3.**  $^{29}\text{Si}$  NMR spectrum of the solution containing  $(\text{Eind})_2\text{Si}$ : (**3b**) in  $\text{C}_7\text{D}_8$  at  $-20\text{ }^\circ\text{C}$ , ranging from  $-1100$  to  $900$  ppm.

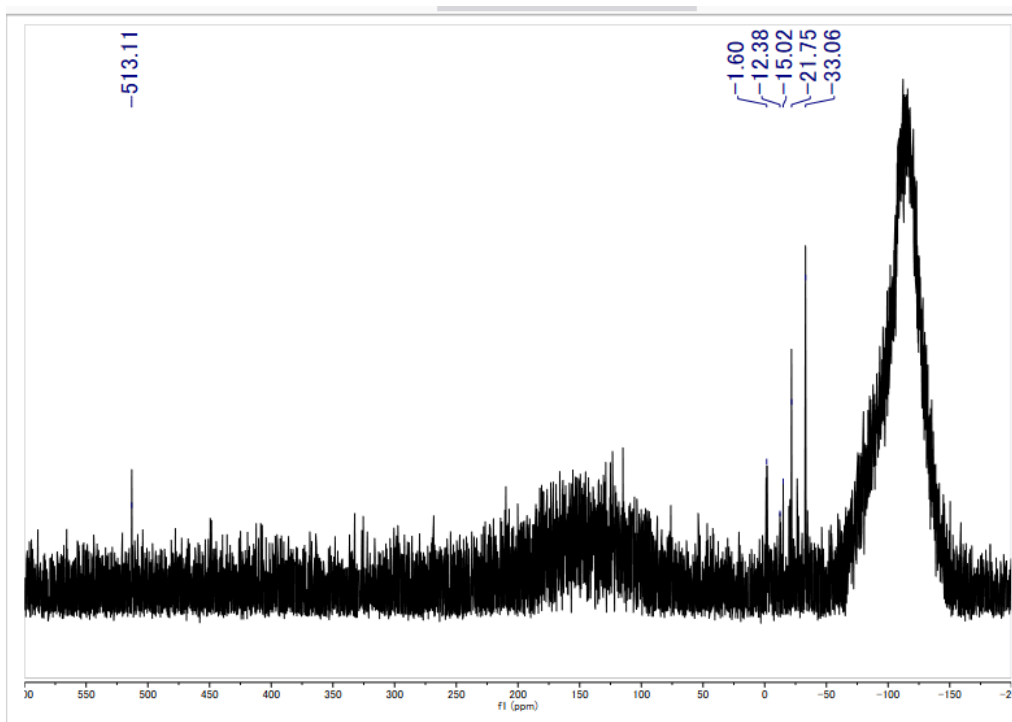

**Figure S4.**  $^{29}\text{Si}$  NMR spectrum of the solution containing  $(\text{Eind})_2\text{Si}$ : (**3b**) in  $\text{C}_7\text{D}_8$  at  $-20\text{ }^\circ\text{C}$ , ranging from  $-200$  to  $600$  ppm.

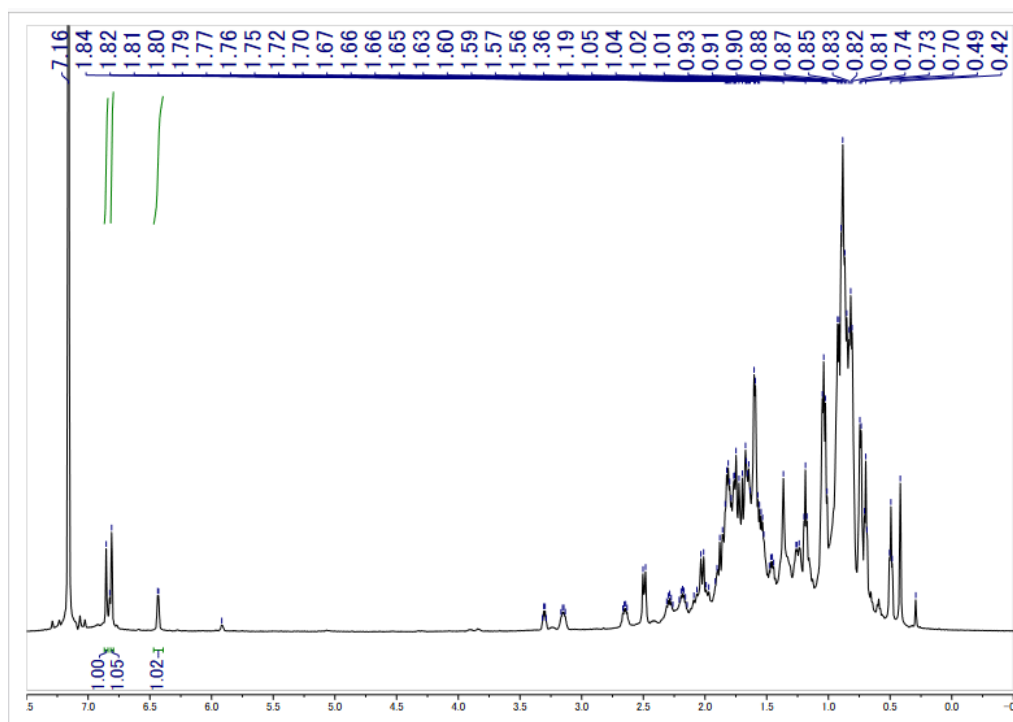

**Figure S5.**  $^1\text{H}$  NMR spectrum of the cyclic hydrosilane (**4b**) in  $\text{C}_6\text{D}_6$  at 20 °C.

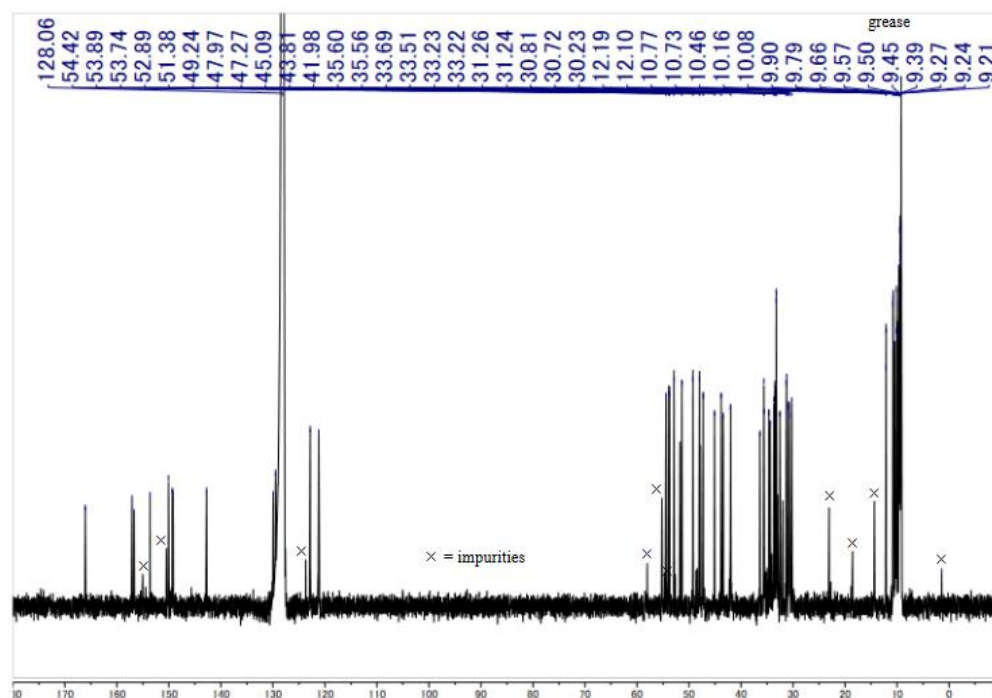

**Figure S6.**  $^{13}\text{C}$  NMR spectrum of the cyclic hydrosilane (**4b**) in  $\text{C}_6\text{D}_6$  at 20 °C, ranging from -10 to 180 ppm.

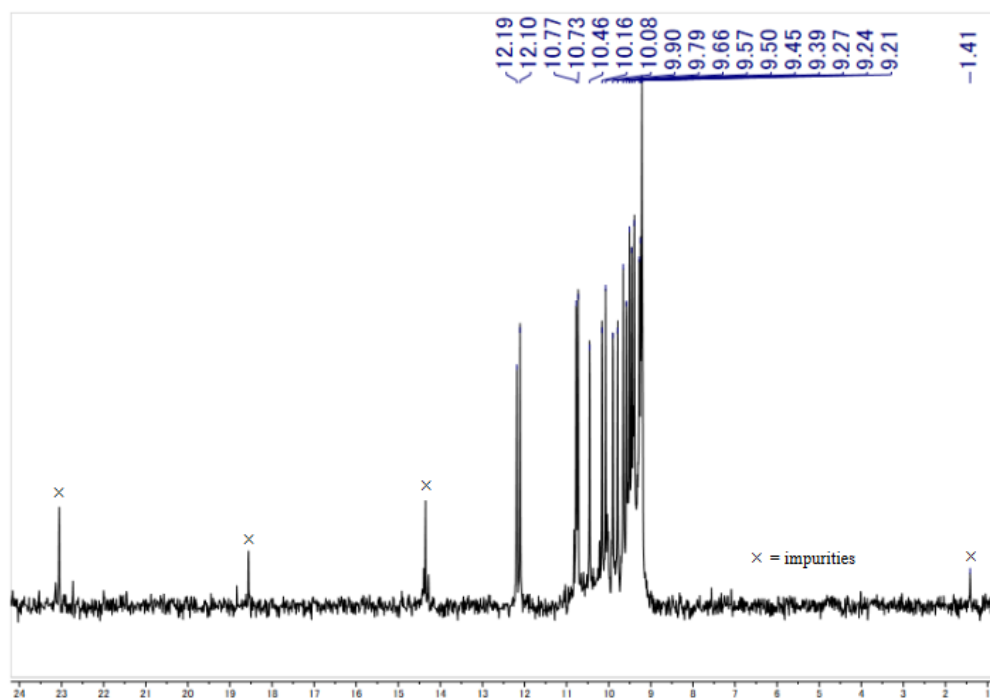

**Figure S7.**  $^{13}\text{C}$  NMR spectrum of the cyclic hydrosilane (**4b**) in  $\text{C}_6\text{D}_6$  at 20  $^\circ\text{C}$ , ranging from 1 to 24 ppm.

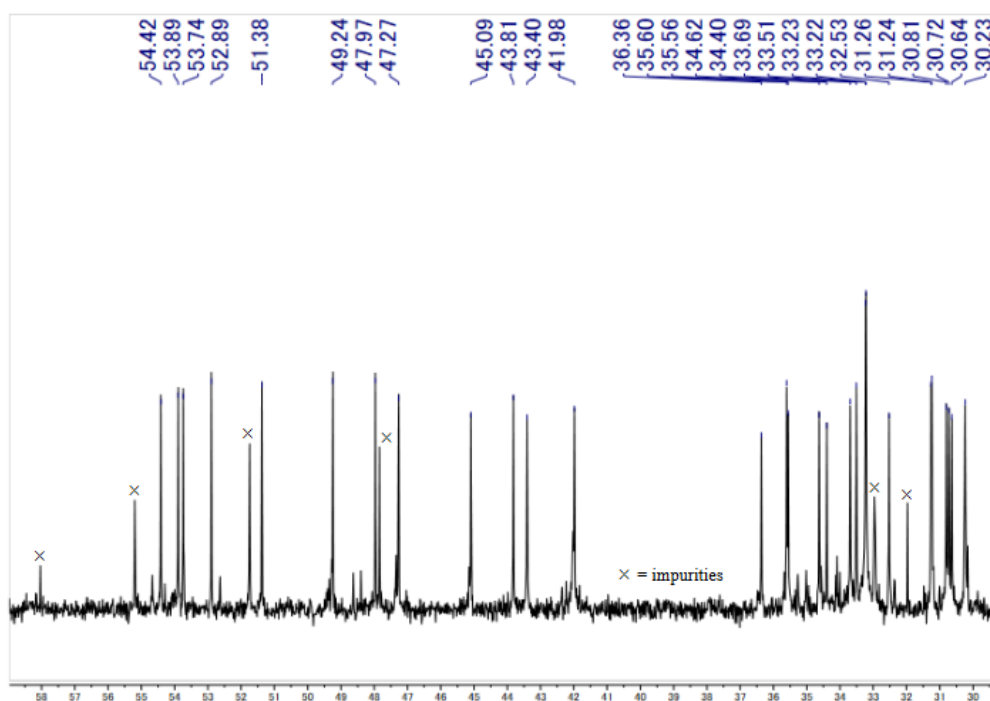

**Figure S8.**  $^{13}\text{C}$  NMR spectrum of the cyclic hydrosilane (**4b**) in  $\text{C}_6\text{D}_6$  at 20  $^\circ\text{C}$ , ranging from 29 to 59 ppm.

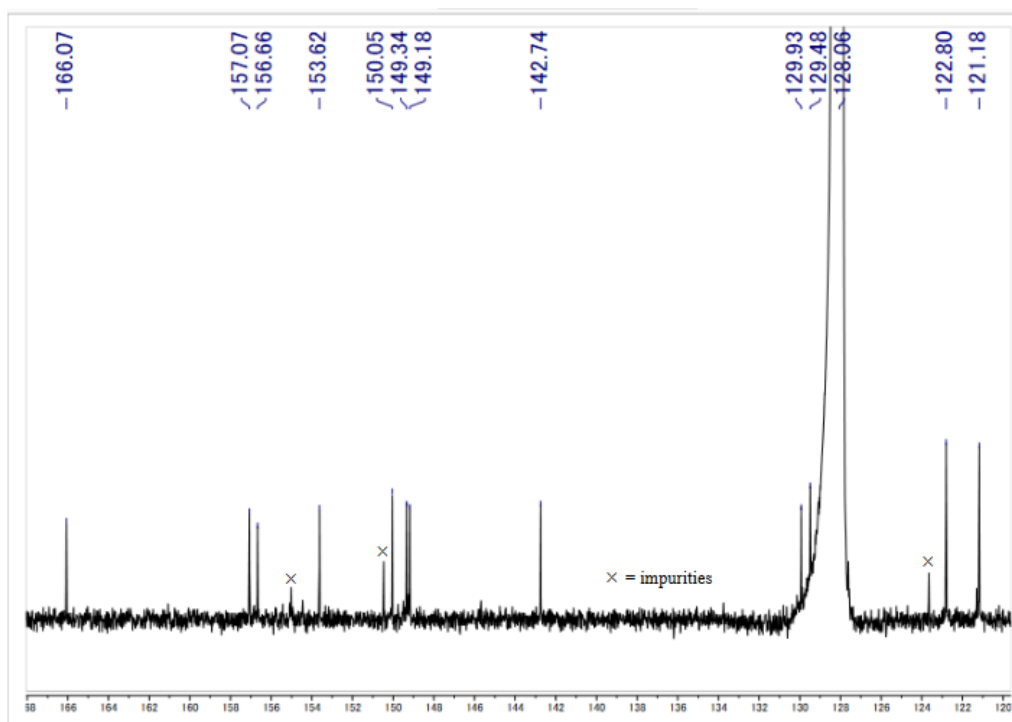

**Figure S9.**  $^{13}\text{C}$  NMR spectrum of the cyclic hydrosilane (**4b**) in  $\text{C}_6\text{D}_6$  at 20 °C, ranging from 120 to 166 ppm.

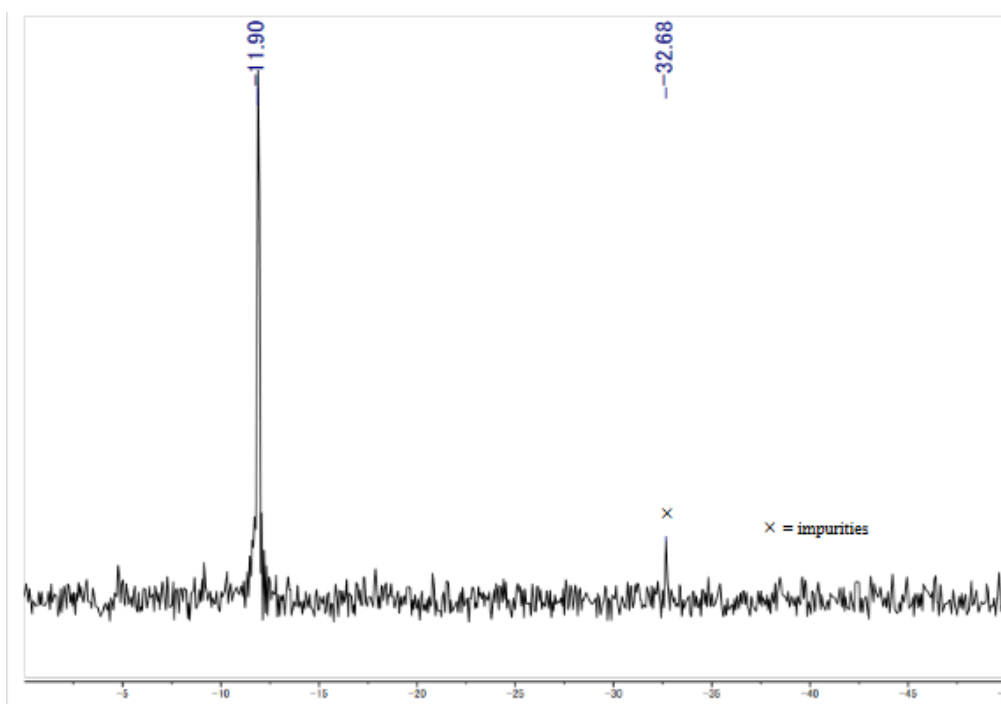

**Figure S10.**  $^{29}\text{Si}$  NMR spectrum of the cyclic hydrosilane (**4b**) in  $\text{C}_6\text{D}_6$  at 20 °C.

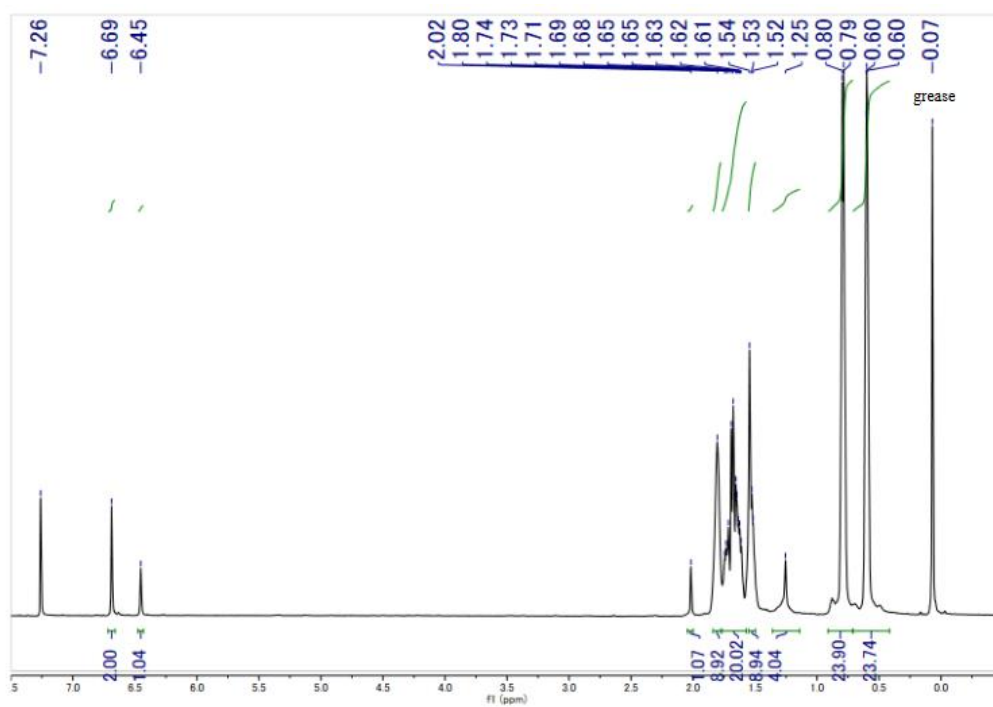

**Figure S11.** <sup>1</sup>H NMR spectrum of (Eind)<sub>2</sub>SiH(OH) (**5b**) in CDCl<sub>3</sub> at 20 °C.

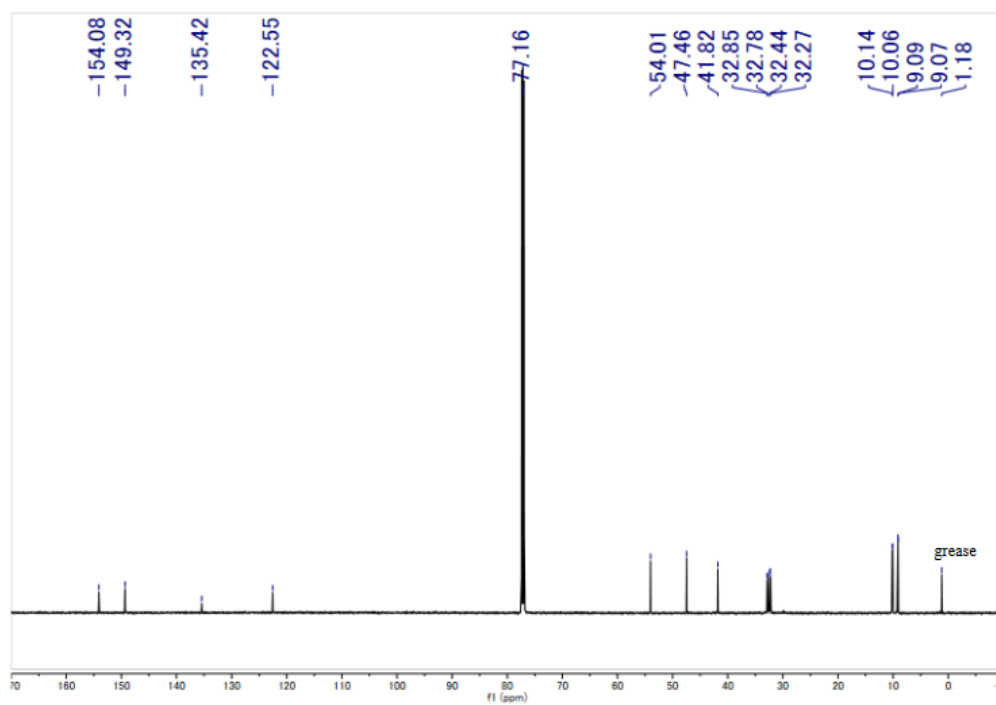

**Figure S12.** <sup>13</sup>C NMR spectrum of (Eind)<sub>2</sub>SiH(OH) (**5b**) in CDCl<sub>3</sub> at 20 °C.

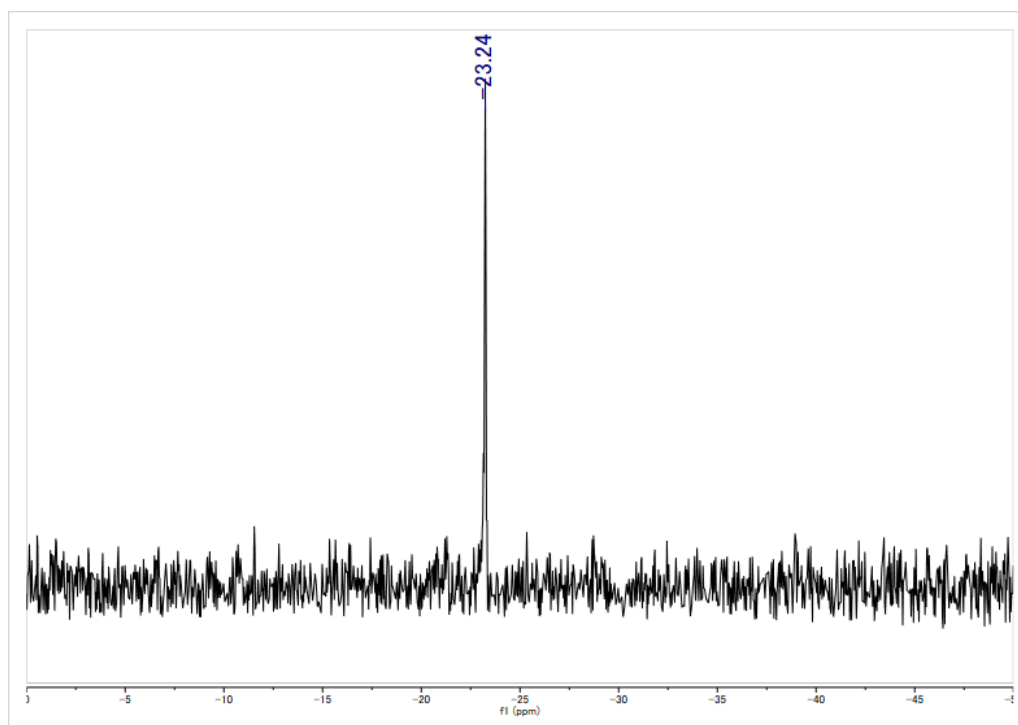

**Figure S13.**  $^{29}\text{Si}$  NMR spectrum of  $(\text{Eind})_2\text{SiH}(\text{OH})$  (**5b**) in  $\text{CDCl}_3$  at 20 °C.



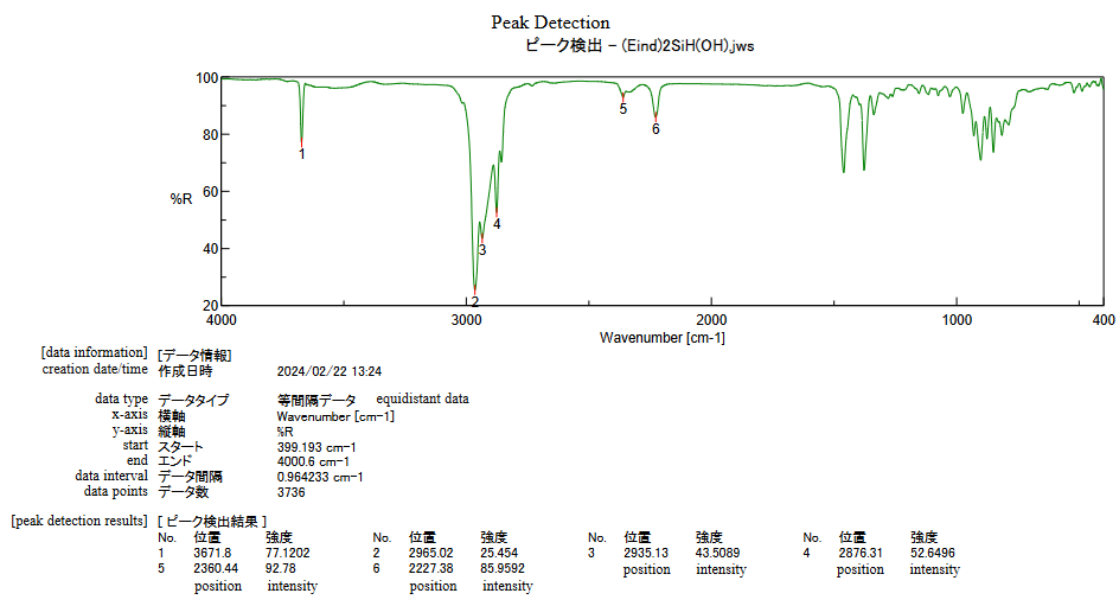

**Figure S14.** IR spectrum of (Eind)<sub>2</sub>SiH(OH) (**5b**) in KBr at ambient temperature.
