# Supplementary material for: Approach to the “Missing” Diarylsilylene: Formation, Characterization, and Intramolecular C–H Bond Activation of Blue Diarylsilylenes with Bulky Rind Groups
Source: Int J Mol Sci. 2024 Mar 28;25(7):3761. doi: 10.3390/ijms25073761 (PMC11011690; doi:10.3390/ijms25073761)
Supplement: Supplementary file 1 [file ijms-25-03761-s001.zip]

Archive with 7 entries (7 files):
- 5b.cif
- 5b_checkcif.pdf
- CrystalA.cif
- CrystalA_checkcif.pdf
- CrystalB.cif
- CrystalB_checkcif.pdf
- Supplementary materias TM New.pdf
