# Supplementary material for: Approach to the “Missing” Diarylsilylene: Formation, Characterization, and Intramolecular C–H Bond Activation of Blue Diarylsilylenes with Bulky Rind Groups
Source: Int J Mol Sci. 2024 Mar 28;25(7):3761. doi: 10.3390/ijms25073761 (PMC11011690; doi:10.3390/ijms25073761)
Supplement: Supplementary file 1 [file ijms-25-03761-s001.zip › 5b.cif]

data_Silanol

# start Validation Reply Form
_vrf_PLAT420_Silanol
;
PROBLEM: D-H Bond Without Acceptor  O1A      --H1A      .     Please Check 
RESPONSE: The O-H groups are isolated 
from other electronegative atoms in the crystal structure.
;
# end Validation Reply Form
 
_audit_creation_method            'SHELXL-2019/3'
_shelx_SHELXL_version_number      '2019/3'
_chemical_name_systematic         ?
_chemical_name_common             ?
_chemical_melting_point           ?
_chemical_formula_moiety         'C56 H92 O Si'
_chemical_formula_sum            'C56 H92 O Si'
_chemical_formula_weight          809.38

loop_
 _atom_type_symbol
 _atom_type_description
 _atom_type_scat_dispersion_real
 _atom_type_scat_dispersion_imag
 _atom_type_scat_source
 'C'  'C'   0.0033   0.0016
 'International Tables Vol C Tables 4.2.6.8 and 6.1.1.4'
 'H'  'H'   0.0000   0.0000
 'International Tables Vol C Tables 4.2.6.8 and 6.1.1.4'
 'O'  'O'   0.0106   0.0060
 'International Tables Vol C Tables 4.2.6.8 and 6.1.1.4'
 'Si'  'Si'   0.0817   0.0704
 'International Tables Vol C Tables 4.2.6.8 and 6.1.1.4'
 
_space_group_crystal_system       monoclinic
_space_group_IT_number            14
_space_group_name_H-M_alt         'P 21/c'
_space_group_name_Hall            '-P 2ybc'
 
_shelx_space_group_comment
;
The symmetry employed for this shelxl refinement is uniquely defined
by the following loop, which should always be used as a source of
symmetry information in preference to the above space-group names.
They are only intended as comments.
;
 
loop_
 _space_group_symop_operation_xyz
 'x, y, z'
 '-x, y+1/2, -z+1/2'
 '-x, -y, -z'
 'x, -y-1/2, z-1/2'
 
_cell_length_a                    12.9236(3)
_cell_length_b                    18.9633(4)
_cell_length_c                    20.6577(5)
_cell_angle_alpha                 90
_cell_angle_beta                  102.518(2)
_cell_angle_gamma                 90
_cell_volume                      4942.3(2)
_cell_formula_units_Z             4
_cell_measurement_temperature     100
_cell_measurement_reflns_used   23979
_cell_measurement_theta_min     1.9280
_cell_measurement_theta_max     29.0150
 
_exptl_crystal_description        block
_exptl_crystal_colour             colourless
_exptl_crystal_density_meas       ?
_exptl_crystal_density_method     ?
_exptl_crystal_density_diffrn     1.088
_exptl_crystal_F_000              1800
_exptl_transmission_factor_min    ?
_exptl_transmission_factor_max    ?
_exptl_crystal_size_max           0.270
_exptl_crystal_size_mid           0.180
_exptl_crystal_size_min           0.120
_exptl_absorpt_coefficient_mu     0.084
_shelx_estimated_absorpt_T_min    0.978
_shelx_estimated_absorpt_T_max    0.990
_exptl_absorpt_correction_type    Gaussian
_exptl_absorpt_correction_T_min   0.674
_exptl_absorpt_correction_T_max   1.000
_exptl_absorpt_process_details
;
CrysAlisPro 1.171.43.90 (Rigaku Oxford Diffraction, 2023)
Numerical absorption correction based on gaussian integration over
a multifaceted crystal model
Empirical absorption correction using spherical harmonics,
implemented in SCALE3 ABSPACK scaling algorithm.
;
_exptl_absorpt_special_details    ?
_diffrn_ambient_temperature       100
_diffrn_radiation_wavelength      0.71073
_diffrn_radiation_type            MoK\a
_diffrn_source             'Rotating anode'
_diffrn_measurement_device 'four-circle diffractometer'
_diffrn_measurement_device_type 'XtaLAB AFC12 (RINC): Kappa single'
_diffrn_measurement_method       '\w-scan'
_diffrn_detector_area_resol_mean  5.8140
_diffrn_reflns_number             122903
_diffrn_reflns_av_unetI/netI      0.0501
_diffrn_reflns_av_R_equivalents   0.0700
_diffrn_reflns_limit_h_min        -17
_diffrn_reflns_limit_h_max        17
_diffrn_reflns_limit_k_min        -25
_diffrn_reflns_limit_k_max        25
_diffrn_reflns_limit_l_min        -28
_diffrn_reflns_limit_l_max        28
_diffrn_reflns_theta_min          1.939
_diffrn_reflns_theta_max          29.250
_diffrn_reflns_theta_full         25.242
_diffrn_measured_fraction_theta_max   0.961
_diffrn_measured_fraction_theta_full  1.000
_diffrn_reflns_Laue_measured_fraction_max    0.961
_diffrn_reflns_Laue_measured_fraction_full   1.000
_diffrn_reflns_point_group_measured_fraction_max   0.961
_diffrn_reflns_point_group_measured_fraction_full  1.000
_reflns_number_total              12940
_reflns_number_gt                 9996
_reflns_threshold_expression      'I > 2\s(I)'
_reflns_Friedel_coverage          0.000
_reflns_Friedel_fraction_max      .
_reflns_Friedel_fraction_full     .
 
_reflns_special_details
;
 Reflections were merged by SHELXL according to the crystal
 class for the calculation of statistics and refinement.
 
 _reflns_Friedel_fraction is defined as the number of unique
 Friedel pairs measured divided by the number that would be
 possible theoretically, ignoring centric projections and
 systematic absences.
;
 
_computing_data_collection     'CrysAlisPro system (CCD 39.46e (release 04-06-2018))'
_computing_cell_refinement     'CrysAlisPro 1.171.43.90 (Rigaku OD, 2023)'
_computing_data_reduction      'CrysAlisPro 1.171.43.90 (Rigaku OD, 2023)'
_computing_structure_solution  'SHELXT-2018/2'
_computing_structure_refinement 'SHELXL-2019/3 (Sheldrick, 2019)'
_computing_molecular_graphics   'SHELXLE'
_computing_publication_material 'SHELXL-2019/3 (Sheldrick, 2019)'
_refine_special_details           ?
_refine_ls_structure_factor_coef  Fsqd
_refine_ls_matrix_type            full
_refine_ls_weighting_scheme       calc
_refine_ls_weighting_details
'w=1/[\s^2^(Fo^2^)+(0.0506P)^2^+1.2550P] where P=(Fo^2^+2Fc^2^)/3'
_atom_sites_solution_primary     'dual space'
_atom_sites_solution_secondary    difmap
_atom_sites_solution_hydrogens    difmap
_refine_ls_hydrogen_treatment     mixed
_refine_ls_extinction_method      none
_refine_ls_extinction_coef        .
_refine_ls_number_reflns          12940
_refine_ls_number_parameters      563
_refine_ls_number_restraints      3
_refine_ls_R_factor_all           0.0657
_refine_ls_R_factor_gt            0.0455
_refine_ls_wR_factor_ref          0.1147
_refine_ls_wR_factor_gt           0.1070
_refine_ls_goodness_of_fit_ref    1.048
_refine_ls_restrained_S_all       1.048
_refine_ls_shift/su_max           0.001
_refine_ls_shift/su_mean          0.000
 
loop_
 _atom_site_label
 _atom_site_type_symbol
 _atom_site_fract_x
 _atom_site_fract_y
 _atom_site_fract_z
 _atom_site_U_iso_or_equiv
 _atom_site_adp_type
 _atom_site_occupancy
 _atom_site_site_symmetry_order  
 _atom_site_calc_flag
 _atom_site_refinement_flags_posn
 _atom_site_refinement_flags_adp
 _atom_site_refinement_flags_occupancy
 _atom_site_disorder_assembly
 _atom_site_disorder_group
Si1 Si 0.36343(2) 0.34192(2) 0.18825(2) 0.01429(8) Uani 1 1 d D . . . .
H2A H 0.405(3) 0.3976(18) 0.1536(17) 0.021 Uiso 0.525(3) 1 d D U P . .
H2B H 0.351(3) 0.2720(16) 0.1602(19) 0.021 Uiso 0.475(3) 1 d D U P . .
O1A O 0.37286(15) 0.27232(10) 0.14510(9) 0.0182(5) Uani 0.525(3) 1 d D . P A 1
H1A H 0.416(2) 0.2372(13) 0.1619(17) 0.053(11) Uiso 0.525(3) 1 d D . P A 1
O1B O 0.40594(19) 0.39059(12) 0.13511(10) 0.0200(6) Uani 0.475(3) 1 d D . P A -2
H1B H 0.374(3) 0.4232(16) 0.1076(16) 0.052(12) Uiso 0.475(3) 1 d D . P A -2
C1 C 0.22111(9) 0.37280(6) 0.18243(6) 0.0137(2) Uani 1 1 d . . . . .
C2 C 0.13377(9) 0.33768(6) 0.14002(6) 0.0135(2) Uani 1 1 d . . . . .
C3 C 0.12860(9) 0.28405(6) 0.08151(6) 0.0147(2) Uani 1 1 d . . . . .
C4 C 0.00991(9) 0.28848(7) 0.04540(6) 0.0175(2) Uani 1 1 d . . . . .
H4A H 0.001756 0.320826 0.007008 0.021 Uiso 1 1 calc R U . . .
H4B H -0.015898 0.241272 0.028833 0.021 Uiso 1 1 calc R U . . .
C5 C -0.05486(9) 0.31565(6) 0.09423(6) 0.0153(2) Uani 1 1 d . . . . .
C6 C 0.02909(9) 0.35522(6) 0.14327(6) 0.0141(2) Uani 1 1 d . . . . .
C7 C 0.00769(9) 0.40503(6) 0.18734(6) 0.0164(2) Uani 1 1 d . . . . .
H7 H -0.062601 0.411620 0.193153 0.020 Uiso 1 1 calc R U . . .
C8 C 0.09005(9) 0.44519(6) 0.22290(6) 0.0155(2) Uani 1 1 d . . . . .
C9 C 0.07744(10) 0.50463(6) 0.26949(6) 0.0191(2) Uani 1 1 d . . . . .
C10 C 0.18402(10) 0.54376(6) 0.27568(7) 0.0208(3) Uani 1 1 d . . . . .
H10A H 0.209511 0.560762 0.321688 0.025 Uiso 1 1 calc R U . . .
H10B H 0.174538 0.585047 0.245639 0.025 Uiso 1 1 calc R U . . .
C11 C 0.26642(9) 0.49197(6) 0.25691(6) 0.0194(3) Uani 1 1 d . . . . .
C12 C 0.19519(9) 0.43181(6) 0.21950(6) 0.0147(2) Uani 1 1 d . . . . .
C13 C 0.19700(10) 0.30558(7) 0.03169(6) 0.0189(2) Uani 1 1 d . . . . .
H13A H 0.271812 0.293856 0.051479 0.023 Uiso 1 1 calc R U . . .
H13B H 0.175059 0.276478 -0.008749 0.023 Uiso 1 1 calc R U . . .
C14 C 0.19158(11) 0.38270(7) 0.01113(7) 0.0258(3) Uani 1 1 d . . . . .
H14A H 0.236772 0.390445 -0.020660 0.039 Uiso 1 1 calc R U . . .
H14B H 0.216244 0.412304 0.050324 0.039 Uiso 1 1 calc R U . . .
H14C H 0.118217 0.395058 -0.009515 0.039 Uiso 1 1 calc R U . . .
C15 C 0.15517(10) 0.20679(6) 0.10451(6) 0.0179(2) Uani 1 1 d . . . . .
H15A H 0.230475 0.204876 0.128076 0.022 Uiso 1 1 calc R U . . .
H15B H 0.111835 0.194235 0.136888 0.022 Uiso 1 1 calc R U . . .
C16 C 0.13714(12) 0.15070(7) 0.04982(7) 0.0271(3) Uani 1 1 d . . . . .
H16A H 0.061601 0.148685 0.028677 0.041 Uiso 1 1 calc R U . . .
H16B H 0.160261 0.104649 0.069196 0.041 Uiso 1 1 calc R U . . .
H16C H 0.178021 0.162904 0.016613 0.041 Uiso 1 1 calc R U . . .
C17 C -0.14696(10) 0.36379(7) 0.05980(6) 0.0217(3) Uani 1 1 d . . . . .
H17A H -0.195069 0.335710 0.025551 0.026 Uiso 1 1 calc R U . . .
H17B H -0.187595 0.378048 0.093148 0.026 Uiso 1 1 calc R U . . .
C18 C -0.11586(12) 0.43035(8) 0.02705(7) 0.0322(3) Uani 1 1 d . . . . .
H18A H -0.088641 0.417346 -0.012054 0.048 Uiso 1 1 calc R U . . .
H18B H -0.060832 0.455682 0.058609 0.048 Uiso 1 1 calc R U . . .
H18C H -0.178129 0.460752 0.013585 0.048 Uiso 1 1 calc R U . . .
C19 C -0.09995(9) 0.25630(6) 0.13149(6) 0.0175(2) Uani 1 1 d . . . . .
H19A H -0.040260 0.226637 0.154631 0.021 Uiso 1 1 calc R U . . .
H19B H -0.132506 0.278166 0.165782 0.021 Uiso 1 1 calc R U . . .
C20 C -0.18205(11) 0.20862(7) 0.08846(7) 0.0267(3) Uani 1 1 d . . . . .
H20A H -0.243608 0.236790 0.067139 0.040 Uiso 1 1 calc R U . . .
H20B H -0.204413 0.172198 0.116188 0.040 Uiso 1 1 calc R U . . .
H20C H -0.150899 0.186223 0.054397 0.040 Uiso 1 1 calc R U . . .
C21 C -0.01926(10) 0.55215(7) 0.24299(7) 0.0267(3) Uani 1 1 d . . . . .
H21A H -0.084170 0.525081 0.244570 0.032 Uiso 1 1 calc R U . . .
H21B H -0.016334 0.592760 0.273455 0.032 Uiso 1 1 calc R U . . .
C22 C -0.02979(12) 0.58041(8) 0.17324(8) 0.0358(3) Uani 1 1 d . . . . .
H22A H -0.022389 0.541552 0.143293 0.054 Uiso 1 1 calc R U . . .
H22B H 0.025723 0.615506 0.172824 0.054 Uiso 1 1 calc R U . . .
H22C H -0.099519 0.602443 0.158487 0.054 Uiso 1 1 calc R U . . .
C23 C 0.06501(11) 0.47043(7) 0.33556(7) 0.0250(3) Uani 1 1 d . . . . .
H23A H 0.001686 0.439616 0.326096 0.030 Uiso 1 1 calc R U . . .
H23B H 0.127312 0.439860 0.351831 0.030 Uiso 1 1 calc R U . . .
C24 C 0.05418(13) 0.52085(9) 0.39122(8) 0.0385(4) Uani 1 1 d . . . . .
H24A H 0.116994 0.551150 0.402078 0.058 Uiso 1 1 calc R U . . .
H24B H 0.047730 0.493704 0.430516 0.058 Uiso 1 1 calc R U . . .
H24C H -0.009139 0.550113 0.376829 0.058 Uiso 1 1 calc R U . . .
C25 C 0.32757(11) 0.52992(8) 0.21063(8) 0.0302(3) Uani 1 1 d . . . . .
H25A H 0.357520 0.574142 0.232420 0.036 Uiso 1 1 calc R U . . .
H25B H 0.387757 0.499702 0.205527 0.036 Uiso 1 1 calc R U . . .
C26 C 0.26303(14) 0.54790(8) 0.14201(8) 0.0382(4) Uani 1 1 d . . . . .
H26A H 0.309242 0.569585 0.115757 0.057 Uiso 1 1 calc R U . . .
H26B H 0.206479 0.580962 0.146020 0.057 Uiso 1 1 calc R U . . .
H26C H 0.231746 0.504736 0.120001 0.057 Uiso 1 1 calc R U . . .
C27 C 0.34385(11) 0.46811(7) 0.32115(7) 0.0299(3) Uani 1 1 d . . . . .
H27A H 0.301790 0.450651 0.352589 0.036 Uiso 1 1 calc R U . . .
H27B H 0.386044 0.427988 0.310249 0.036 Uiso 1 1 calc R U . . .
C28 C 0.42075(13) 0.52509(9) 0.35628(9) 0.0432(4) Uani 1 1 d . . . . .
H28A H 0.469257 0.538620 0.327950 0.065 Uiso 1 1 calc R U . . .
H28B H 0.461572 0.506435 0.398368 0.065 Uiso 1 1 calc R U . . .
H28C H 0.380392 0.566488 0.364904 0.065 Uiso 1 1 calc R U . . .
C29 C 0.45980(9) 0.32648(6) 0.27202(6) 0.0134(2) Uani 1 1 d . . . . .
C30 C 0.43230(9) 0.28668(6) 0.32508(6) 0.0141(2) Uani 1 1 d . . . . .
C31 C 0.32784(9) 0.24813(6) 0.32900(6) 0.0145(2) Uani 1 1 d . . . . .
C32 C 0.35730(9) 0.20538(6) 0.39505(6) 0.0167(2) Uani 1 1 d . . . . .
H32A H 0.307699 0.217391 0.423791 0.020 Uiso 1 1 calc R U . . .
H32B H 0.351116 0.154246 0.385343 0.020 Uiso 1 1 calc R U . . .
C33 C 0.47212(9) 0.22311(6) 0.43129(6) 0.0173(2) Uani 1 1 d . . . . .
C34 C 0.50665(9) 0.27444(6) 0.38393(6) 0.0157(2) Uani 1 1 d . . . . .
C35 C 0.60707(9) 0.30376(7) 0.39521(6) 0.0179(2) Uani 1 1 d . . . . .
H35 H 0.654295 0.298995 0.437169 0.021 Uiso 1 1 calc R U . . .
C36 C 0.63734(9) 0.33999(6) 0.34449(6) 0.0161(2) Uani 1 1 d . . . . .
C37 C 0.74698(9) 0.37056(7) 0.34817(6) 0.0186(2) Uani 1 1 d . . . . .
C38 C 0.75022(9) 0.37427(7) 0.27424(6) 0.0185(2) Uani 1 1 d . . . . .
H38A H 0.787915 0.332651 0.261827 0.022 Uiso 1 1 calc R U . . .
H38B H 0.788538 0.417216 0.265478 0.022 Uiso 1 1 calc R U . . .
C39 C 0.63388(9) 0.37595(6) 0.23240(6) 0.0152(2) Uani 1 1 d . . . . .
C40 C 0.56821(9) 0.34900(6) 0.28247(6) 0.0142(2) Uani 1 1 d . . . . .
C41 C 0.23934(9) 0.30102(6) 0.33491(6) 0.0179(2) Uani 1 1 d . . . . .
H41A H 0.262653 0.328277 0.376387 0.022 Uiso 1 1 calc R U . . .
H41B H 0.230869 0.334705 0.297515 0.022 Uiso 1 1 calc R U . . .
C42 C 0.13099(10) 0.26846(7) 0.33508(7) 0.0245(3) Uani 1 1 d . . . . .
H42A H 0.100909 0.248534 0.291274 0.037 Uiso 1 1 calc R U . . .
H42B H 0.083432 0.304947 0.345524 0.037 Uiso 1 1 calc R U . . .
H42C H 0.139274 0.231069 0.368556 0.037 Uiso 1 1 calc R U . . .
C43 C 0.28926(10) 0.19856(6) 0.26979(6) 0.0182(2) Uani 1 1 d . . . . .
H43A H 0.230498 0.169557 0.279143 0.022 Uiso 1 1 calc R U . . .
H43B H 0.260065 0.227690 0.230281 0.022 Uiso 1 1 calc R U . . .
C44 C 0.37270(11) 0.14925(7) 0.25282(7) 0.0242(3) Uani 1 1 d . . . . .
H44A H 0.340952 0.120989 0.213847 0.036 Uiso 1 1 calc R U . . .
H44B H 0.399333 0.117933 0.290482 0.036 Uiso 1 1 calc R U . . .
H44C H 0.431441 0.177120 0.243214 0.036 Uiso 1 1 calc R U . . .
C45 C 0.48119(10) 0.25486(7) 0.50091(6) 0.0235(3) Uani 1 1 d . . . . .
H45A H 0.449510 0.221204 0.527726 0.028 Uiso 1 1 calc R U . . .
H45B H 0.557322 0.259275 0.522118 0.028 Uiso 1 1 calc R U . . .
C46 C 0.42921(12) 0.32622(8) 0.50371(7) 0.0321(3) Uani 1 1 d . . . . .
H46A H 0.459721 0.360346 0.477482 0.048 Uiso 1 1 calc R U . . .
H46B H 0.441534 0.342227 0.549859 0.048 Uiso 1 1 calc R U . . .
H46C H 0.352823 0.322179 0.485605 0.048 Uiso 1 1 calc R U . . .
C47 C 0.54387(10) 0.15709(7) 0.43641(7) 0.0241(3) Uani 1 1 d . . . . .
H47A H 0.539042 0.138101 0.391213 0.029 Uiso 1 1 calc R U . . .
H47B H 0.618205 0.171898 0.453625 0.029 Uiso 1 1 calc R U . . .
C48 C 0.51802(12) 0.09761(8) 0.48046(7) 0.0298(3) Uani 1 1 d . . . . .
H48A H 0.443506 0.083996 0.465534 0.045 Uiso 1 1 calc R U . . .
H48B H 0.530599 0.113898 0.526524 0.045 Uiso 1 1 calc R U . . .
H48C H 0.563412 0.056863 0.477507 0.045 Uiso 1 1 calc R U . . .
C49 C 0.75352(11) 0.44586(7) 0.37853(7) 0.0252(3) Uani 1 1 d . . . . .
H49A H 0.825434 0.464694 0.379981 0.030 Uiso 1 1 calc R U . . .
H49B H 0.702678 0.476411 0.348272 0.030 Uiso 1 1 calc R U . . .
C50 C 0.73104(14) 0.45201(9) 0.44786(7) 0.0375(4) Uani 1 1 d . . . . .
H50A H 0.736011 0.501542 0.461707 0.056 Uiso 1 1 calc R U . . .
H50B H 0.783068 0.424094 0.479086 0.056 Uiso 1 1 calc R U . . .
H50C H 0.659591 0.434330 0.447301 0.056 Uiso 1 1 calc R U . . .
C51 C 0.83759(10) 0.32507(8) 0.38828(7) 0.0243(3) Uani 1 1 d . . . . .
H51A H 0.905752 0.347756 0.386119 0.029 Uiso 1 1 calc R U . . .
H51B H 0.831785 0.325510 0.435288 0.029 Uiso 1 1 calc R U . . .
C52 C 0.84178(12) 0.24863(8) 0.36660(7) 0.0318(3) Uani 1 1 d . . . . .
H52A H 0.857304 0.246973 0.322245 0.048 Uiso 1 1 calc R U . . .
H52B H 0.773262 0.226021 0.365594 0.048 Uiso 1 1 calc R U . . .
H52C H 0.897475 0.223661 0.397989 0.048 Uiso 1 1 calc R U . . .
C53 C 0.60846(10) 0.45248(6) 0.20786(6) 0.0186(2) Uani 1 1 d . . . . .
H53A H 0.531717 0.455734 0.187896 0.022 Uiso 1 1 calc R U . . .
H53B H 0.623343 0.484379 0.246708 0.022 Uiso 1 1 calc R U . . .
C54 C 0.67014(10) 0.47889(7) 0.15703(6) 0.0218(3) Uani 1 1 d . . . . .
H54A H 0.648844 0.451848 0.115870 0.033 Uiso 1 1 calc R U . . .
H54B H 0.746289 0.472744 0.174818 0.033 Uiso 1 1 calc R U . . .
H54C H 0.654696 0.528960 0.147933 0.033 Uiso 1 1 calc R U . . .
C55 C 0.62396(9) 0.32411(6) 0.17339(6) 0.0167(2) Uani 1 1 d . . . . .
H55A H 0.553847 0.331185 0.143363 0.020 Uiso 1 1 calc R U . . .
H55B H 0.678589 0.336432 0.148303 0.020 Uiso 1 1 calc R U . . .
C56 C 0.63573(10) 0.24587(7) 0.19185(7) 0.0223(3) Uani 1 1 d . . . . .
H56A H 0.621213 0.217279 0.151371 0.033 Uiso 1 1 calc R U . . .
H56B H 0.585388 0.233514 0.219318 0.033 Uiso 1 1 calc R U . . .
H56C H 0.708140 0.236756 0.216668 0.033 Uiso 1 1 calc R U . . .
 
loop_
 _atom_site_aniso_label
 _atom_site_aniso_U_11
 _atom_site_aniso_U_22
 _atom_site_aniso_U_33
 _atom_site_aniso_U_23
 _atom_site_aniso_U_13
 _atom_site_aniso_U_12
Si1 0.01265(15) 0.01640(16) 0.01435(16) 0.00201(12) 0.00413(12) 0.00241(12)
O1A 0.0177(10) 0.0204(9) 0.0159(10) -0.0020(7) 0.0024(7) 0.0026(7)
O1B 0.0162(9) 0.0238(11) 0.0212(12) 0.0060(9) 0.0067(9) 0.0035(8)
C1 0.0137(5) 0.0129(5) 0.0147(5) 0.0032(4) 0.0036(4) 0.0007(4)
C2 0.0146(5) 0.0127(5) 0.0137(5) 0.0020(4) 0.0041(4) 0.0011(4)
C3 0.0153(5) 0.0157(6) 0.0138(5) -0.0009(4) 0.0046(4) -0.0003(4)
C4 0.0160(6) 0.0221(6) 0.0143(6) -0.0012(5) 0.0028(4) -0.0006(5)
C5 0.0130(5) 0.0168(6) 0.0157(6) -0.0001(4) 0.0022(4) 0.0007(4)
C6 0.0135(5) 0.0141(5) 0.0149(5) 0.0024(4) 0.0034(4) -0.0003(4)
C7 0.0129(5) 0.0167(6) 0.0206(6) 0.0009(5) 0.0056(5) 0.0015(4)
C8 0.0162(5) 0.0127(5) 0.0181(6) 0.0008(4) 0.0051(4) 0.0015(4)
C9 0.0170(6) 0.0155(6) 0.0257(6) -0.0054(5) 0.0066(5) 0.0003(5)
C10 0.0180(6) 0.0145(6) 0.0308(7) -0.0049(5) 0.0075(5) -0.0008(5)
C11 0.0163(6) 0.0150(6) 0.0265(7) -0.0052(5) 0.0035(5) -0.0006(4)
C12 0.0148(5) 0.0127(5) 0.0165(6) 0.0016(4) 0.0030(4) -0.0004(4)
C13 0.0181(6) 0.0229(6) 0.0176(6) -0.0003(5) 0.0078(5) -0.0005(5)
C14 0.0317(7) 0.0256(7) 0.0230(7) 0.0055(5) 0.0121(6) -0.0004(6)
C15 0.0197(6) 0.0160(6) 0.0193(6) -0.0018(5) 0.0067(5) 0.0002(5)
C16 0.0337(7) 0.0199(7) 0.0292(7) -0.0067(5) 0.0102(6) -0.0029(6)
C17 0.0158(6) 0.0231(6) 0.0247(7) 0.0019(5) 0.0011(5) 0.0021(5)
C18 0.0333(8) 0.0270(7) 0.0329(8) 0.0108(6) -0.0006(6) 0.0046(6)
C19 0.0163(6) 0.0176(6) 0.0195(6) -0.0010(5) 0.0058(5) -0.0013(4)
C20 0.0281(7) 0.0253(7) 0.0280(7) -0.0052(6) 0.0087(6) -0.0098(6)
C21 0.0202(6) 0.0200(6) 0.0404(8) -0.0092(6) 0.0076(6) 0.0037(5)
C22 0.0341(8) 0.0240(7) 0.0472(9) 0.0024(7) 0.0038(7) 0.0116(6)
C23 0.0253(7) 0.0257(7) 0.0259(7) -0.0077(5) 0.0099(5) -0.0062(5)
C24 0.0441(9) 0.0424(9) 0.0329(8) -0.0182(7) 0.0169(7) -0.0135(7)
C25 0.0238(7) 0.0236(7) 0.0477(9) -0.0112(6) 0.0177(6) -0.0090(5)
C26 0.0566(10) 0.0244(7) 0.0405(9) 0.0007(6) 0.0260(8) -0.0124(7)
C27 0.0267(7) 0.0211(7) 0.0356(8) -0.0115(6) -0.0072(6) 0.0051(5)
C28 0.0319(8) 0.0357(9) 0.0522(10) -0.0206(8) -0.0126(7) 0.0013(7)
C29 0.0134(5) 0.0117(5) 0.0155(6) 0.0003(4) 0.0043(4) 0.0008(4)
C30 0.0135(5) 0.0124(5) 0.0176(6) 0.0002(4) 0.0057(4) -0.0002(4)
C31 0.0139(5) 0.0143(5) 0.0159(6) 0.0020(4) 0.0047(4) -0.0018(4)
C32 0.0165(5) 0.0177(6) 0.0163(6) 0.0033(5) 0.0047(4) -0.0019(4)
C33 0.0158(5) 0.0199(6) 0.0164(6) 0.0042(5) 0.0040(4) -0.0011(5)
C34 0.0159(5) 0.0168(6) 0.0155(6) 0.0012(4) 0.0057(4) 0.0001(4)
C35 0.0151(5) 0.0227(6) 0.0148(6) 0.0015(5) 0.0012(4) -0.0014(5)
C36 0.0133(5) 0.0168(6) 0.0181(6) -0.0007(5) 0.0033(4) -0.0016(4)
C37 0.0144(5) 0.0221(6) 0.0194(6) 0.0017(5) 0.0035(5) -0.0047(5)
C38 0.0135(5) 0.0222(6) 0.0202(6) 0.0033(5) 0.0045(5) -0.0021(5)
C39 0.0132(5) 0.0163(6) 0.0165(6) 0.0024(4) 0.0044(4) -0.0004(4)
C40 0.0151(5) 0.0124(5) 0.0161(5) 0.0004(4) 0.0055(4) -0.0008(4)
C41 0.0153(5) 0.0189(6) 0.0209(6) 0.0027(5) 0.0067(5) -0.0002(5)
C42 0.0174(6) 0.0278(7) 0.0299(7) 0.0037(6) 0.0089(5) -0.0006(5)
C43 0.0196(6) 0.0177(6) 0.0176(6) 0.0005(5) 0.0047(5) -0.0048(5)
C44 0.0327(7) 0.0161(6) 0.0254(7) -0.0015(5) 0.0097(6) -0.0018(5)
C45 0.0217(6) 0.0320(7) 0.0172(6) 0.0020(5) 0.0047(5) -0.0051(5)
C46 0.0400(8) 0.0330(8) 0.0254(7) -0.0063(6) 0.0114(6) -0.0037(6)
C47 0.0213(6) 0.0248(7) 0.0256(7) 0.0078(5) 0.0040(5) 0.0033(5)
C48 0.0335(8) 0.0257(7) 0.0284(7) 0.0099(6) 0.0025(6) 0.0019(6)
C49 0.0248(7) 0.0248(7) 0.0263(7) -0.0023(5) 0.0056(5) -0.0094(5)
C50 0.0520(10) 0.0326(8) 0.0278(8) -0.0074(6) 0.0086(7) -0.0128(7)
C51 0.0147(6) 0.0350(8) 0.0219(7) 0.0051(6) 0.0012(5) -0.0029(5)
C52 0.0262(7) 0.0353(8) 0.0313(8) 0.0084(6) 0.0003(6) 0.0075(6)
C53 0.0178(6) 0.0158(6) 0.0232(6) 0.0027(5) 0.0066(5) -0.0005(5)
C54 0.0230(6) 0.0192(6) 0.0241(7) 0.0055(5) 0.0072(5) -0.0008(5)
C55 0.0157(5) 0.0184(6) 0.0171(6) 0.0006(5) 0.0062(5) 0.0006(4)
C56 0.0225(6) 0.0193(6) 0.0279(7) -0.0006(5) 0.0115(5) 0.0004(5)
 
_geom_special_details
;
 All esds (except the esd in the dihedral angle between two l.s. planes)
 are estimated using the full covariance matrix.  The cell esds are taken
 into account individually in the estimation of esds in distances, angles
 and torsion angles; correlations between esds in cell parameters are only
 used when they are defined by crystal symmetry.  An approximate (isotropic)
 treatment of cell esds is used for estimating esds involving l.s. planes.
;
 
loop_
 _geom_bond_atom_site_label_1
 _geom_bond_atom_site_label_2
 _geom_bond_distance
 _geom_bond_site_symmetry_2
 _geom_bond_publ_flag
Si1 O1A 1.6121(18) . ?
Si1 O1B 1.619(2) . ?
Si1 C1 1.9090(11) . ?
Si1 C29 1.9228(12) . ?
Si1 H2A 1.44(3) . ?
Si1 H2B 1.44(3) . ?
O1A H2B 0.46(4) . ?
O1A H1A 0.887(10) . ?
O1B H2A 0.41(4) . ?
O1B H1B 0.882(10) . ?
C1 C2 1.4342(16) . ?
C1 C12 1.4359(16) . ?
C2 C6 1.4088(15) . ?
C2 C3 1.5699(16) . ?
C3 C13 1.5497(16) . ?
C3 C15 1.5554(16) . ?
C3 C4 1.5557(16) . ?
C4 C5 1.5330(16) . ?
C4 H4A 0.9900 . ?
C4 H4B 0.9900 . ?
C5 C6 1.5133(16) . ?
C5 C17 1.5455(16) . ?
C5 C19 1.5470(16) . ?
C6 C7 1.3807(16) . ?
C7 C8 1.3834(16) . ?
C7 H7 0.9500 . ?
C8 C12 1.3990(16) . ?
C8 C9 1.5137(16) . ?
C9 C21 1.5418(18) . ?
C9 C10 1.5453(17) . ?
C9 C23 1.5505(18) . ?
C10 C11 1.5582(16) . ?
C10 H10A 0.9900 . ?
C10 H10B 0.9900 . ?
C11 C25 1.5440(18) . ?
C11 C27 1.5463(19) . ?
C11 C12 1.5613(16) . ?
C13 C14 1.5201(18) . ?
C13 H13A 0.9900 . ?
C13 H13B 0.9900 . ?
C14 H14A 0.9800 . ?
C14 H14B 0.9800 . ?
C14 H14C 0.9800 . ?
C15 C16 1.5323(17) . ?
C15 H15A 0.9900 . ?
C15 H15B 0.9900 . ?
C16 H16A 0.9800 . ?
C16 H16B 0.9800 . ?
C16 H16C 0.9800 . ?
C17 C18 1.5265(19) . ?
C17 H17A 0.9900 . ?
C17 H17B 0.9900 . ?
C18 H18A 0.9800 . ?
C18 H18B 0.9800 . ?
C18 H18C 0.9800 . ?
C19 C20 1.5246(17) . ?
C19 H19A 0.9900 . ?
C19 H19B 0.9900 . ?
C20 H20A 0.9800 . ?
C20 H20B 0.9800 . ?
C20 H20C 0.9800 . ?
C21 C22 1.516(2) . ?
C21 H21A 0.9900 . ?
C21 H21B 0.9900 . ?
C22 H22A 0.9800 . ?
C22 H22B 0.9800 . ?
C22 H22C 0.9800 . ?
C23 C24 1.5250(19) . ?
C23 H23A 0.9900 . ?
C23 H23B 0.9900 . ?
C24 H24A 0.9800 . ?
C24 H24B 0.9800 . ?
C24 H24C 0.9800 . ?
C25 C26 1.519(2) . ?
C25 H25A 0.9900 . ?
C25 H25B 0.9900 . ?
C26 H26A 0.9800 . ?
C26 H26B 0.9800 . ?
C26 H26C 0.9800 . ?
C27 C28 1.539(2) . ?
C27 H27A 0.9900 . ?
C27 H27B 0.9900 . ?
C28 H28A 0.9800 . ?
C28 H28B 0.9800 . ?
C28 H28C 0.9800 . ?
C29 C40 1.4356(15) . ?
C29 C30 1.4375(15) . ?
C30 C34 1.3960(16) . ?
C30 C31 1.5527(15) . ?
C31 C43 1.5374(16) . ?
C31 C41 1.5459(16) . ?
C31 C32 1.5617(16) . ?
C32 C33 1.5472(16) . ?
C32 H32A 0.9900 . ?
C32 H32B 0.9900 . ?
C33 C34 1.5143(16) . ?
C33 C45 1.5400(18) . ?
C33 C47 1.5479(17) . ?
C34 C35 1.3844(16) . ?
C35 C36 1.3788(16) . ?
C35 H35 0.9500 . ?
C36 C40 1.4044(16) . ?
C36 C37 1.5174(16) . ?
C37 C38 1.5386(17) . ?
C37 C51 1.5432(18) . ?
C37 C49 1.5544(18) . ?
C38 C39 1.5637(16) . ?
C38 H38A 0.9900 . ?
C38 H38B 0.9900 . ?
C39 C53 1.5488(16) . ?
C39 C55 1.5496(16) . ?
C39 C40 1.5594(15) . ?
C41 C42 1.5310(17) . ?
C41 H41A 0.9900 . ?
C41 H41B 0.9900 . ?
C42 H42A 0.9800 . ?
C42 H42B 0.9800 . ?
C42 H42C 0.9800 . ?
C43 C44 1.5246(18) . ?
C43 H43A 0.9900 . ?
C43 H43B 0.9900 . ?
C44 H44A 0.9800 . ?
C44 H44B 0.9800 . ?
C44 H44C 0.9800 . ?
C45 C46 1.517(2) . ?
C45 H45A 0.9900 . ?
C45 H45B 0.9900 . ?
C46 H46A 0.9800 . ?
C46 H46B 0.9800 . ?
C46 H46C 0.9800 . ?
C47 C48 1.5308(18) . ?
C47 H47A 0.9900 . ?
C47 H47B 0.9900 . ?
C48 H48A 0.9800 . ?
C48 H48B 0.9800 . ?
C48 H48C 0.9800 . ?
C49 C50 1.526(2) . ?
C49 H49A 0.9900 . ?
C49 H49B 0.9900 . ?
C50 H50A 0.9800 . ?
C50 H50B 0.9800 . ?
C50 H50C 0.9800 . ?
C51 C52 1.522(2) . ?
C51 H51A 0.9900 . ?
C51 H51B 0.9900 . ?
C52 H52A 0.9800 . ?
C52 H52B 0.9800 . ?
C52 H52C 0.9800 . ?
C53 C54 1.5334(16) . ?
C53 H53A 0.9900 . ?
C53 H53B 0.9900 . ?
C54 H54A 0.9800 . ?
C54 H54B 0.9800 . ?
C54 H54C 0.9800 . ?
C55 C56 1.5313(17) . ?
C55 H55A 0.9900 . ?
C55 H55B 0.9900 . ?
C56 H56A 0.9800 . ?
C56 H56B 0.9800 . ?
C56 H56C 0.9800 . ?
 
loop_
 _geom_angle_atom_site_label_1
 _geom_angle_atom_site_label_2
 _geom_angle_atom_site_label_3
 _geom_angle
 _geom_angle_site_symmetry_1
 _geom_angle_site_symmetry_3
 _geom_angle_publ_flag
O1A Si1 C1 113.81(8) . . ?
O1B Si1 C1 104.26(9) . . ?
O1A Si1 C29 105.13(8) . . ?
O1B Si1 C29 116.64(9) . . ?
C1 Si1 C29 122.05(5) . . ?
O1A Si1 H2A 104.1(15) . . ?
O1B Si1 H2A 13.8(15) . . ?
C1 Si1 H2A 101.6(16) . . ?
C29 Si1 H2A 108.7(16) . . ?
O1A Si1 H2B 16.2(16) . . ?
O1B Si1 H2B 106.0(16) . . ?
C1 Si1 H2B 103.6(17) . . ?
C29 Si1 H2B 102.4(17) . . ?
H2A Si1 H2B 120(2) . . ?
Si1 O1A H2B 60(4) . . ?
Si1 O1A H1A 121(2) . . ?
H2B O1A H1A 98(5) . . ?
Si1 O1B H2A 58(4) . . ?
Si1 O1B H1B 131(3) . . ?
H2A O1B H1B 106(6) . . ?
C2 C1 C12 116.36(10) . . ?
C2 C1 Si1 121.07(8) . . ?
C12 C1 Si1 122.57(8) . . ?
C6 C2 C1 119.87(10) . . ?
C6 C2 C3 107.98(9) . . ?
C1 C2 C3 131.89(10) . . ?
C13 C3 C15 109.34(9) . . ?
C13 C3 C4 108.20(9) . . ?
C15 C3 C4 109.07(9) . . ?
C13 C3 C2 113.92(9) . . ?
C15 C3 C2 113.90(9) . . ?
C4 C3 C2 101.96(9) . . ?
C5 C4 C3 108.96(9) . . ?
C5 C4 H4A 109.9 . . ?
C3 C4 H4A 109.9 . . ?
C5 C4 H4B 109.9 . . ?
C3 C4 H4B 109.9 . . ?
H4A C4 H4B 108.3 . . ?
C6 C5 C4 101.11(9) . . ?
C6 C5 C17 112.59(10) . . ?
C4 C5 C17 111.82(10) . . ?
C6 C5 C19 108.69(9) . . ?
C4 C5 C19 113.64(10) . . ?
C17 C5 C19 108.85(9) . . ?
C7 C6 C2 121.64(11) . . ?
C7 C6 C5 124.30(10) . . ?
C2 C6 C5 114.05(10) . . ?
C6 C7 C8 119.06(11) . . ?
C6 C7 H7 120.5 . . ?
C8 C7 H7 120.5 . . ?
C7 C8 C12 121.15(11) . . ?
C7 C8 C9 124.83(10) . . ?
C12 C8 C9 113.99(10) . . ?
C8 C9 C21 113.59(11) . . ?
C8 C9 C10 101.14(9) . . ?
C21 C9 C10 112.83(10) . . ?
C8 C9 C23 107.11(10) . . ?
C21 C9 C23 109.05(10) . . ?
C10 C9 C23 112.87(11) . . ?
C9 C10 C11 108.77(10) . . ?
C9 C10 H10A 109.9 . . ?
C11 C10 H10A 109.9 . . ?
C9 C10 H10B 109.9 . . ?
C11 C10 H10B 109.9 . . ?
H10A C10 H10B 108.3 . . ?
C25 C11 C27 110.17(11) . . ?
C25 C11 C10 109.23(10) . . ?
C27 C11 C10 108.72(11) . . ?
C25 C11 C12 111.10(10) . . ?
C27 C11 C12 114.43(10) . . ?
C10 C11 C12 102.84(9) . . ?
C8 C12 C1 120.63(10) . . ?
C8 C12 C11 108.51(10) . . ?
C1 C12 C11 130.75(10) . . ?
C14 C13 C3 116.14(10) . . ?
C14 C13 H13A 108.3 . . ?
C3 C13 H13A 108.3 . . ?
C14 C13 H13B 108.3 . . ?
C3 C13 H13B 108.3 . . ?
H13A C13 H13B 107.4 . . ?
C13 C14 H14A 109.5 . . ?
C13 C14 H14B 109.5 . . ?
H14A C14 H14B 109.5 . . ?
C13 C14 H14C 109.5 . . ?
H14A C14 H14C 109.5 . . ?
H14B C14 H14C 109.5 . . ?
C16 C15 C3 116.13(10) . . ?
C16 C15 H15A 108.3 . . ?
C3 C15 H15A 108.3 . . ?
C16 C15 H15B 108.3 . . ?
C3 C15 H15B 108.3 . . ?
H15A C15 H15B 107.4 . . ?
C15 C16 H16A 109.5 . . ?
C15 C16 H16B 109.5 . . ?
H16A C16 H16B 109.5 . . ?
C15 C16 H16C 109.5 . . ?
H16A C16 H16C 109.5 . . ?
H16B C16 H16C 109.5 . . ?
C18 C17 C5 116.22(11) . . ?
C18 C17 H17A 108.2 . . ?
C5 C17 H17A 108.2 . . ?
C18 C17 H17B 108.2 . . ?
C5 C17 H17B 108.2 . . ?
H17A C17 H17B 107.4 . . ?
C17 C18 H18A 109.5 . . ?
C17 C18 H18B 109.5 . . ?
H18A C18 H18B 109.5 . . ?
C17 C18 H18C 109.5 . . ?
H18A C18 H18C 109.5 . . ?
H18B C18 H18C 109.5 . . ?
C20 C19 C5 115.53(10) . . ?
C20 C19 H19A 108.4 . . ?
C5 C19 H19A 108.4 . . ?
C20 C19 H19B 108.4 . . ?
C5 C19 H19B 108.4 . . ?
H19A C19 H19B 107.5 . . ?
C19 C20 H20A 109.5 . . ?
C19 C20 H20B 109.5 . . ?
H20A C20 H20B 109.5 . . ?
C19 C20 H20C 109.5 . . ?
H20A C20 H20C 109.5 . . ?
H20B C20 H20C 109.5 . . ?
C22 C21 C9 116.30(11) . . ?
C22 C21 H21A 108.2 . . ?
C9 C21 H21A 108.2 . . ?
C22 C21 H21B 108.2 . . ?
C9 C21 H21B 108.2 . . ?
H21A C21 H21B 107.4 . . ?
C21 C22 H22A 109.5 . . ?
C21 C22 H22B 109.5 . . ?
H22A C22 H22B 109.5 . . ?
C21 C22 H22C 109.5 . . ?
H22A C22 H22C 109.5 . . ?
H22B C22 H22C 109.5 . . ?
C24 C23 C9 116.45(12) . . ?
C24 C23 H23A 108.2 . . ?
C9 C23 H23A 108.2 . . ?
C24 C23 H23B 108.2 . . ?
C9 C23 H23B 108.2 . . ?
H23A C23 H23B 107.3 . . ?
C23 C24 H24A 109.5 . . ?
C23 C24 H24B 109.5 . . ?
H24A C24 H24B 109.5 . . ?
C23 C24 H24C 109.5 . . ?
H24A C24 H24C 109.5 . . ?
H24B C24 H24C 109.5 . . ?
C26 C25 C11 115.54(11) . . ?
C26 C25 H25A 108.4 . . ?
C11 C25 H25A 108.4 . . ?
C26 C25 H25B 108.4 . . ?
C11 C25 H25B 108.4 . . ?
H25A C25 H25B 107.5 . . ?
C25 C26 H26A 109.5 . . ?
C25 C26 H26B 109.5 . . ?
H26A C26 H26B 109.5 . . ?
C25 C26 H26C 109.5 . . ?
H26A C26 H26C 109.5 . . ?
H26B C26 H26C 109.5 . . ?
C28 C27 C11 115.53(12) . . ?
C28 C27 H27A 108.4 . . ?
C11 C27 H27A 108.4 . . ?
C28 C27 H27B 108.4 . . ?
C11 C27 H27B 108.4 . . ?
H27A C27 H27B 107.5 . . ?
C27 C28 H28A 109.5 . . ?
C27 C28 H28B 109.5 . . ?
H28A C28 H28B 109.5 . . ?
C27 C28 H28C 109.5 . . ?
H28A C28 H28C 109.5 . . ?
H28B C28 H28C 109.5 . . ?
C40 C29 C30 115.85(10) . . ?
C40 C29 Si1 120.71(8) . . ?
C30 C29 Si1 123.18(8) . . ?
C34 C30 C29 120.94(10) . . ?
C34 C30 C31 108.57(9) . . ?
C29 C30 C31 130.42(10) . . ?
C43 C31 C41 109.97(10) . . ?
C43 C31 C30 112.47(9) . . ?
C41 C31 C30 111.42(9) . . ?
C43 C31 C32 110.70(9) . . ?
C41 C31 C32 108.19(9) . . ?
C30 C31 C32 103.88(9) . . ?
C33 C32 C31 109.67(9) . . ?
C33 C32 H32A 109.7 . . ?
C31 C32 H32A 109.7 . . ?
C33 C32 H32B 109.7 . . ?
C31 C32 H32B 109.7 . . ?
H32A C32 H32B 108.2 . . ?
C34 C33 C45 112.25(10) . . ?
C34 C33 C32 102.30(9) . . ?
C45 C33 C32 114.06(10) . . ?
C34 C33 C47 107.94(10) . . ?
C45 C33 C47 109.22(10) . . ?
C32 C33 C47 110.78(10) . . ?
C35 C34 C30 121.53(11) . . ?
C35 C34 C33 123.10(11) . . ?
C30 C34 C33 115.21(10) . . ?
C36 C35 C34 118.83(11) . . ?
C36 C35 H35 120.6 . . ?
C34 C35 H35 120.6 . . ?
C35 C36 C40 121.65(10) . . ?
C35 C36 C37 124.60(11) . . ?
C40 C36 C37 113.69(10) . . ?
C36 C37 C38 101.17(9) . . ?
C36 C37 C51 113.90(10) . . ?
C38 C37 C51 112.20(10) . . ?
C36 C37 C49 109.86(10) . . ?
C38 C37 C49 110.34(10) . . ?
C51 C37 C49 109.16(10) . . ?
C37 C38 C39 108.65(9) . . ?
C37 C38 H38A 110.0 . . ?
C39 C38 H38A 110.0 . . ?
C37 C38 H38B 110.0 . . ?
C39 C38 H38B 110.0 . . ?
H38A C38 H38B 108.3 . . ?
C53 C39 C55 111.19(9) . . ?
C53 C39 C40 114.64(9) . . ?
C55 C39 C40 110.47(9) . . ?
C53 C39 C38 108.08(10) . . ?
C55 C39 C38 109.12(9) . . ?
C40 C39 C38 102.89(9) . . ?
C36 C40 C29 120.54(10) . . ?
C36 C40 C39 108.35(9) . . ?
C29 C40 C39 130.65(10) . . ?
C42 C41 C31 115.55(10) . . ?
C42 C41 H41A 108.4 . . ?
C31 C41 H41A 108.4 . . ?
C42 C41 H41B 108.4 . . ?
C31 C41 H41B 108.4 . . ?
H41A C41 H41B 107.5 . . ?
C41 C42 H42A 109.5 . . ?
C41 C42 H42B 109.5 . . ?
H42A C42 H42B 109.5 . . ?
C41 C42 H42C 109.5 . . ?
H42A C42 H42C 109.5 . . ?
H42B C42 H42C 109.5 . . ?
C44 C43 C31 115.74(10) . . ?
C44 C43 H43A 108.3 . . ?
C31 C43 H43A 108.3 . . ?
C44 C43 H43B 108.3 . . ?
C31 C43 H43B 108.3 . . ?
H43A C43 H43B 107.4 . . ?
C43 C44 H44A 109.5 . . ?
C43 C44 H44B 109.5 . . ?
H44A C44 H44B 109.5 . . ?
C43 C44 H44C 109.5 . . ?
H44A C44 H44C 109.5 . . ?
H44B C44 H44C 109.5 . . ?
C46 C45 C33 116.08(11) . . ?
C46 C45 H45A 108.3 . . ?
C33 C45 H45A 108.3 . . ?
C46 C45 H45B 108.3 . . ?
C33 C45 H45B 108.3 . . ?
H45A C45 H45B 107.4 . . ?
C45 C46 H46A 109.5 . . ?
C45 C46 H46B 109.5 . . ?
H46A C46 H46B 109.5 . . ?
C45 C46 H46C 109.5 . . ?
H46A C46 H46C 109.5 . . ?
H46B C46 H46C 109.5 . . ?
C48 C47 C33 115.59(11) . . ?
C48 C47 H47A 108.4 . . ?
C33 C47 H47A 108.4 . . ?
C48 C47 H47B 108.4 . . ?
C33 C47 H47B 108.4 . . ?
H47A C47 H47B 107.4 . . ?
C47 C48 H48A 109.5 . . ?
C47 C48 H48B 109.5 . . ?
H48A C48 H48B 109.5 . . ?
C47 C48 H48C 109.5 . . ?
H48A C48 H48C 109.5 . . ?
H48B C48 H48C 109.5 . . ?
C50 C49 C37 116.35(11) . . ?
C50 C49 H49A 108.2 . . ?
C37 C49 H49A 108.2 . . ?
C50 C49 H49B 108.2 . . ?
C37 C49 H49B 108.2 . . ?
H49A C49 H49B 107.4 . . ?
C49 C50 H50A 109.5 . . ?
C49 C50 H50B 109.5 . . ?
H50A C50 H50B 109.5 . . ?
C49 C50 H50C 109.5 . . ?
H50A C50 H50C 109.5 . . ?
H50B C50 H50C 109.5 . . ?
C52 C51 C37 116.47(11) . . ?
C52 C51 H51A 108.2 . . ?
C37 C51 H51A 108.2 . . ?
C52 C51 H51B 108.2 . . ?
C37 C51 H51B 108.2 . . ?
H51A C51 H51B 107.3 . . ?
C51 C52 H52A 109.5 . . ?
C51 C52 H52B 109.5 . . ?
H52A C52 H52B 109.5 . . ?
C51 C52 H52C 109.5 . . ?
H52A C52 H52C 109.5 . . ?
H52B C52 H52C 109.5 . . ?
C54 C53 C39 115.17(10) . . ?
C54 C53 H53A 108.5 . . ?
C39 C53 H53A 108.5 . . ?
C54 C53 H53B 108.5 . . ?
C39 C53 H53B 108.5 . . ?
H53A C53 H53B 107.5 . . ?
C53 C54 H54A 109.5 . . ?
C53 C54 H54B 109.5 . . ?
H54A C54 H54B 109.5 . . ?
C53 C54 H54C 109.5 . . ?
H54A C54 H54C 109.5 . . ?
H54B C54 H54C 109.5 . . ?
C56 C55 C39 115.59(10) . . ?
C56 C55 H55A 108.4 . . ?
C39 C55 H55A 108.4 . . ?
C56 C55 H55B 108.4 . . ?
C39 C55 H55B 108.4 . . ?
H55A C55 H55B 107.4 . . ?
C55 C56 H56A 109.5 . . ?
C55 C56 H56B 109.5 . . ?
H56A C56 H56B 109.5 . . ?
C55 C56 H56C 109.5 . . ?
H56A C56 H56C 109.5 . . ?
H56B C56 H56C 109.5 . . ?
 
loop_
 _geom_torsion_atom_site_label_1
 _geom_torsion_atom_site_label_2
 _geom_torsion_atom_site_label_3
 _geom_torsion_atom_site_label_4
 _geom_torsion
 _geom_torsion_site_symmetry_1
 _geom_torsion_site_symmetry_2
 _geom_torsion_site_symmetry_3
 _geom_torsion_site_symmetry_4
 _geom_torsion_publ_flag
C12 C1 C2 C6 -8.73(16) . . . . ?
Si1 C1 C2 C6 171.41(8) . . . . ?
C12 C1 C2 C3 164.58(11) . . . . ?
Si1 C1 C2 C3 -15.28(17) . . . . ?
C6 C2 C3 C13 128.07(10) . . . . ?
C1 C2 C3 C13 -45.83(16) . . . . ?
C6 C2 C3 C15 -105.58(11) . . . . ?
C1 C2 C3 C15 80.52(15) . . . . ?
C6 C2 C3 C4 11.76(12) . . . . ?
C1 C2 C3 C4 -162.14(12) . . . . ?
C13 C3 C4 C5 -143.09(10) . . . . ?
C15 C3 C4 C5 98.06(11) . . . . ?
C2 C3 C4 C5 -22.70(12) . . . . ?
C3 C4 C5 C6 24.25(12) . . . . ?
C3 C4 C5 C17 144.26(10) . . . . ?
C3 C4 C5 C19 -92.01(12) . . . . ?
C1 C2 C6 C7 -1.07(17) . . . . ?
C3 C2 C6 C7 -175.84(10) . . . . ?
C1 C2 C6 C5 178.16(10) . . . . ?
C3 C2 C6 C5 3.39(13) . . . . ?
C4 C5 C6 C7 162.07(11) . . . . ?
C17 C5 C6 C7 42.60(15) . . . . ?
C19 C5 C6 C7 -78.07(14) . . . . ?
C4 C5 C6 C2 -17.14(13) . . . . ?
C17 C5 C6 C2 -136.61(11) . . . . ?
C19 C5 C6 C2 102.72(11) . . . . ?
C2 C6 C7 C8 8.62(17) . . . . ?
C5 C6 C7 C8 -170.53(11) . . . . ?
C6 C7 C8 C12 -5.92(18) . . . . ?
C6 C7 C8 C9 175.93(11) . . . . ?
C7 C8 C9 C21 -41.15(17) . . . . ?
C12 C8 C9 C21 140.59(11) . . . . ?
C7 C8 C9 C10 -162.32(12) . . . . ?
C12 C8 C9 C10 19.42(13) . . . . ?
C7 C8 C9 C23 79.32(14) . . . . ?
C12 C8 C9 C23 -98.95(12) . . . . ?
C8 C9 C10 C11 -21.68(13) . . . . ?
C21 C9 C10 C11 -143.37(11) . . . . ?
C23 C9 C10 C11 92.44(12) . . . . ?
C9 C10 C11 C25 135.11(11) . . . . ?
C9 C10 C11 C27 -104.64(12) . . . . ?
C9 C10 C11 C12 17.03(13) . . . . ?
C7 C8 C12 C1 -4.29(18) . . . . ?
C9 C8 C12 C1 174.04(10) . . . . ?
C7 C8 C12 C11 172.27(11) . . . . ?
C9 C8 C12 C11 -9.39(14) . . . . ?
C2 C1 C12 C8 11.40(16) . . . . ?
Si1 C1 C12 C8 -168.75(9) . . . . ?
C2 C1 C12 C11 -164.30(11) . . . . ?
Si1 C1 C12 C11 15.55(17) . . . . ?
C25 C11 C12 C8 -121.73(11) . . . . ?
C27 C11 C12 C8 112.73(12) . . . . ?
C10 C11 C12 C8 -4.99(13) . . . . ?
C25 C11 C12 C1 54.36(17) . . . . ?
C27 C11 C12 C1 -71.17(16) . . . . ?
C10 C11 C12 C1 171.11(12) . . . . ?
C15 C3 C13 C14 -172.23(11) . . . . ?
C4 C3 C13 C14 69.09(13) . . . . ?
C2 C3 C13 C14 -43.53(14) . . . . ?
C13 C3 C15 C16 -59.10(13) . . . . ?
C4 C3 C15 C16 59.04(13) . . . . ?
C2 C3 C15 C16 172.18(10) . . . . ?
C6 C5 C17 C18 52.66(15) . . . . ?
C4 C5 C17 C18 -60.38(15) . . . . ?
C19 C5 C17 C18 173.24(11) . . . . ?
C6 C5 C19 C20 -177.01(10) . . . . ?
C4 C5 C19 C20 -65.29(14) . . . . ?
C17 C5 C19 C20 60.04(13) . . . . ?
C8 C9 C21 C22 -50.85(16) . . . . ?
C10 C9 C21 C22 63.52(15) . . . . ?
C23 C9 C21 C22 -170.22(12) . . . . ?
C8 C9 C23 C24 178.32(12) . . . . ?
C21 C9 C23 C24 -58.36(15) . . . . ?
C10 C9 C23 C24 67.87(15) . . . . ?
C27 C11 C25 C26 172.55(12) . . . . ?
C10 C11 C25 C26 -68.10(15) . . . . ?
C12 C11 C25 C26 44.67(15) . . . . ?
C25 C11 C27 C28 49.63(16) . . . . ?
C10 C11 C27 C28 -70.03(15) . . . . ?
C12 C11 C27 C28 175.66(12) . . . . ?
C40 C29 C30 C34 3.04(16) . . . . ?
Si1 C29 C30 C34 177.24(9) . . . . ?
C40 C29 C30 C31 -173.53(11) . . . . ?
Si1 C29 C30 C31 0.67(17) . . . . ?
C34 C30 C31 C43 -125.83(11) . . . . ?
C29 C30 C31 C43 51.06(16) . . . . ?
C34 C30 C31 C41 110.16(11) . . . . ?
C29 C30 C31 C41 -72.95(15) . . . . ?
C34 C30 C31 C32 -6.09(12) . . . . ?
C29 C30 C31 C32 170.80(11) . . . . ?
C43 C31 C32 C33 125.42(10) . . . . ?
C41 C31 C32 C33 -114.02(11) . . . . ?
C30 C31 C32 C33 4.48(12) . . . . ?
C31 C32 C33 C34 -1.39(12) . . . . ?
C31 C32 C33 C45 120.06(11) . . . . ?
C31 C32 C33 C47 -116.23(11) . . . . ?
C29 C30 C34 C35 4.22(18) . . . . ?
C31 C30 C34 C35 -178.53(11) . . . . ?
C29 C30 C34 C33 -171.44(10) . . . . ?
C31 C30 C34 C33 5.80(14) . . . . ?
C45 C33 C34 C35 58.96(15) . . . . ?
C32 C33 C34 C35 -178.36(11) . . . . ?
C47 C33 C34 C35 -61.46(15) . . . . ?
C45 C33 C34 C30 -125.45(11) . . . . ?
C32 C33 C34 C30 -2.77(13) . . . . ?
C47 C33 C34 C30 114.12(12) . . . . ?
C30 C34 C35 C36 -6.50(18) . . . . ?
C33 C34 C35 C36 168.82(11) . . . . ?
C34 C35 C36 C40 1.33(18) . . . . ?
C34 C35 C36 C37 -175.71(11) . . . . ?
C35 C36 C37 C38 156.50(12) . . . . ?
C40 C36 C37 C38 -20.75(13) . . . . ?
C35 C36 C37 C51 35.92(17) . . . . ?
C40 C36 C37 C51 -141.33(11) . . . . ?
C35 C36 C37 C49 -86.89(14) . . . . ?
C40 C36 C37 C49 95.87(12) . . . . ?
C36 C37 C38 C39 22.73(13) . . . . ?
C51 C37 C38 C39 144.50(10) . . . . ?
C49 C37 C38 C39 -93.53(12) . . . . ?
C37 C38 C39 C53 104.08(11) . . . . ?
C37 C38 C39 C55 -134.89(10) . . . . ?
C37 C38 C39 C40 -17.56(12) . . . . ?
C35 C36 C40 C29 6.10(18) . . . . ?
C37 C36 C40 C29 -176.56(10) . . . . ?
C35 C36 C40 C39 -166.94(11) . . . . ?
C37 C36 C40 C39 10.40(14) . . . . ?
C30 C29 C40 C36 -8.03(16) . . . . ?
Si1 C29 C40 C36 177.62(9) . . . . ?
C30 C29 C40 C39 163.26(11) . . . . ?
Si1 C29 C40 C39 -11.09(17) . . . . ?
C53 C39 C40 C36 -112.43(11) . . . . ?
C55 C39 C40 C36 121.01(10) . . . . ?
C38 C39 C40 C36 4.65(12) . . . . ?
C53 C39 C40 C29 75.48(15) . . . . ?
C55 C39 C40 C29 -51.09(16) . . . . ?
C38 C39 C40 C29 -167.45(12) . . . . ?
C43 C31 C41 C42 51.22(13) . . . . ?
C30 C31 C41 C42 176.62(10) . . . . ?
C32 C31 C41 C42 -69.79(13) . . . . ?
C41 C31 C43 C44 172.94(10) . . . . ?
C30 C31 C43 C44 48.13(14) . . . . ?
C32 C31 C43 C44 -67.57(13) . . . . ?
C34 C33 C45 C46 51.27(15) . . . . ?
C32 C33 C45 C46 -64.50(14) . . . . ?
C47 C33 C45 C46 170.94(11) . . . . ?
C34 C33 C47 C48 -177.79(11) . . . . ?
C45 C33 C47 C48 59.91(14) . . . . ?
C32 C33 C47 C48 -66.54(14) . . . . ?
C36 C37 C49 C50 58.52(15) . . . . ?
C38 C37 C49 C50 169.22(12) . . . . ?
C51 C37 C49 C50 -67.04(15) . . . . ?
C36 C37 C51 C52 55.23(15) . . . . ?
C38 C37 C51 C52 -58.95(15) . . . . ?
C49 C37 C51 C52 178.41(11) . . . . ?
C55 C39 C53 C54 -52.09(14) . . . . ?
C40 C39 C53 C54 -178.28(10) . . . . ?
C38 C39 C53 C54 67.65(13) . . . . ?
C53 C39 C55 C56 -173.71(10) . . . . ?
C40 C39 C55 C56 -45.25(13) . . . . ?
C38 C39 C55 C56 67.17(12) . . . . ?
 
_refine_diff_density_max    0.427
_refine_diff_density_min   -0.260
_refine_diff_density_rms    0.045

_shelx_res_file
;
TITL Silanol
    5b.res
    created by SHELXL-2019/3 at 16:22:14 on 26-Feb-2024
CELL 0.71073 12.9236 18.9633 20.6577 90 102.518 90
ZERR 4 0.0003 0.0004 0.0005 0 0.002 0
LATT 1
SYMM -x, 1/2+y, 1/2-z
SFAC C H O Si
UNIT 224 368 4 4
L.S. 25
LIST 4
FMAP 2
PLAN 10
SIZE 0.12 0.18 0.27
TEMP -173
BOND $H
CONF
ACTA
OMIT 1 0 0
SADI 0.002 Si1 H2A Si1 H2B
WGHT    0.050600    1.255000
FVAR       0.52684   0.52548
SI1   4    0.363430    0.341924    0.188249    11.00000    0.01265    0.01640 =
         0.01435    0.00201    0.00413    0.00241
EADP H2A H2B
FREE H2A O1B
FREE H2B O1A
H2A   2    0.404938    0.397551    0.153621    21.00000   -1.50000
H2B   2    0.351111    0.272031    0.160174   -21.00000   -1.50000
SIMU 0.04 0.08 O1A O1B
DFIX 0.90 0.01 O1A H1A O1B H1B
PART 1 21.000
O1A   3    0.372863    0.272317    0.145097    21.00000    0.01768    0.02039 =
         0.01592   -0.00198    0.00241    0.00263
H1A   2    0.415692    0.237227    0.161882    21.00000    0.05275
PART 0
PART -2 -21.000
O1B   3    0.405938    0.390595    0.135112   -21.00000    0.01616    0.02384 =
         0.02116    0.00599    0.00674    0.00347
H1B   2    0.373539    0.423220    0.107598   -21.00000    0.05223
PART 0
C1    1    0.221112    0.372804    0.182427    11.00000    0.01372    0.01286 =
         0.01473    0.00319    0.00362    0.00070
C2    1    0.133766    0.337677    0.140017    11.00000    0.01465    0.01275 =
         0.01367    0.00201    0.00410    0.00108
C3    1    0.128597    0.284049    0.081506    11.00000    0.01530    0.01568 =
         0.01376   -0.00087    0.00463   -0.00030
C4    1    0.009912    0.288475    0.045396    11.00000    0.01601    0.02207 =
         0.01429   -0.00115    0.00276   -0.00064
AFIX  23
H4A   2    0.001756    0.320826    0.007008    11.00000   -1.20000
H4B   2   -0.015898    0.241272    0.028833    11.00000   -1.20000
AFIX   0
C5    1   -0.054865    0.315653    0.094230    11.00000    0.01298    0.01676 =
         0.01572   -0.00014    0.00221    0.00067
C6    1    0.029089    0.355221    0.143269    11.00000    0.01354    0.01411 =
         0.01490    0.00244    0.00340   -0.00033
C7    1    0.007686    0.405026    0.187337    11.00000    0.01292    0.01669 =
         0.02058    0.00086    0.00556    0.00148
AFIX  43
H7    2   -0.062601    0.411620    0.193153    11.00000   -1.20000
AFIX   0
C8    1    0.090049    0.445191    0.222901    11.00000    0.01624    0.01273 =
         0.01813    0.00083    0.00509    0.00148
C9    1    0.077440    0.504629    0.269493    11.00000    0.01701    0.01547 =
         0.02574   -0.00539    0.00661    0.00034
C10   1    0.184018    0.543761    0.275678    11.00000    0.01799    0.01449 =
         0.03085   -0.00491    0.00748   -0.00078
AFIX  23
H10A  2    0.209511    0.560762    0.321688    11.00000   -1.20000
H10B  2    0.174538    0.585047    0.245639    11.00000   -1.20000
AFIX   0
C11   1    0.266422    0.491965    0.256912    11.00000    0.01626    0.01504 =
         0.02649   -0.00523    0.00354   -0.00055
C12   1    0.195193    0.431809    0.219497    11.00000    0.01481    0.01267 =
         0.01646    0.00160    0.00299   -0.00042
C13   1    0.196997    0.305582    0.031688    11.00000    0.01810    0.02286 =
         0.01755   -0.00035    0.00778   -0.00054
AFIX  23
H13A  2    0.271812    0.293856    0.051479    11.00000   -1.20000
H13B  2    0.175059    0.276478   -0.008749    11.00000   -1.20000
AFIX   0
C14   1    0.191576    0.382697    0.011133    11.00000    0.03167    0.02559 =
         0.02298    0.00548    0.01210   -0.00040
AFIX 137
H14A  2    0.236772    0.390445   -0.020660    11.00000   -1.50000
H14B  2    0.216244    0.412304    0.050324    11.00000   -1.50000
H14C  2    0.118217    0.395058   -0.009515    11.00000   -1.50000
AFIX   0
C15   1    0.155169    0.206794    0.104510    11.00000    0.01969    0.01599 =
         0.01928   -0.00175    0.00671    0.00016
AFIX  23
H15A  2    0.230475    0.204876    0.128076    11.00000   -1.20000
H15B  2    0.111835    0.194235    0.136888    11.00000   -1.20000
AFIX   0
C16   1    0.137138    0.150704    0.049821    11.00000    0.03366    0.01992 =
         0.02921   -0.00672    0.01015   -0.00293
AFIX 137
H16A  2    0.061601    0.148685    0.028677    11.00000   -1.50000
H16B  2    0.160261    0.104649    0.069196    11.00000   -1.50000
H16C  2    0.178021    0.162904    0.016613    11.00000   -1.50000
AFIX   0
C17   1   -0.146960    0.363791    0.059804    11.00000    0.01582    0.02309 =
         0.02468    0.00187    0.00107    0.00214
AFIX  23
H17A  2   -0.195069    0.335710    0.025551    11.00000   -1.20000
H17B  2   -0.187595    0.378048    0.093148    11.00000   -1.20000
AFIX   0
C18   1   -0.115857    0.430350    0.027055    11.00000    0.03330    0.02697 =
         0.03286    0.01083   -0.00065    0.00459
AFIX 137
H18A  2   -0.088641    0.417346   -0.012054    11.00000   -1.50000
H18B  2   -0.060832    0.455682    0.058609    11.00000   -1.50000
H18C  2   -0.178129    0.460752    0.013585    11.00000   -1.50000
AFIX   0
C19   1   -0.099948    0.256298    0.131488    11.00000    0.01630    0.01755 =
         0.01953   -0.00105    0.00576   -0.00127
AFIX  23
H19A  2   -0.040260    0.226637    0.154631    11.00000   -1.20000
H19B  2   -0.132506    0.278166    0.165782    11.00000   -1.20000
AFIX   0
C20   1   -0.182049    0.208619    0.088460    11.00000    0.02811    0.02530 =
         0.02801   -0.00523    0.00870   -0.00983
AFIX 137
H20A  2   -0.243608    0.236790    0.067139    11.00000   -1.50000
H20B  2   -0.204413    0.172198    0.116188    11.00000   -1.50000
H20C  2   -0.150899    0.186223    0.054397    11.00000   -1.50000
AFIX   0
C21   1   -0.019264    0.552153    0.242991    11.00000    0.02024    0.02000 =
         0.04042   -0.00923    0.00759    0.00371
AFIX  23
H21A  2   -0.084170    0.525081    0.244570    11.00000   -1.20000
H21B  2   -0.016334    0.592760    0.273455    11.00000   -1.20000
AFIX   0
C22   1   -0.029792    0.580410    0.173236    11.00000    0.03409    0.02398 =
         0.04719    0.00243    0.00381    0.01159
AFIX 137
H22A  2   -0.022389    0.541552    0.143293    11.00000   -1.50000
H22B  2    0.025723    0.615506    0.172824    11.00000   -1.50000
H22C  2   -0.099519    0.602443    0.158487    11.00000   -1.50000
AFIX   0
C23   1    0.065010    0.470433    0.335560    11.00000    0.02530    0.02573 =
         0.02592   -0.00771    0.00989   -0.00620
AFIX  23
H23A  2    0.001686    0.439616    0.326096    11.00000   -1.20000
H23B  2    0.127312    0.439860    0.351831    11.00000   -1.20000
AFIX   0
C24   1    0.054182    0.520855    0.391219    11.00000    0.04407    0.04243 =
         0.03289   -0.01824    0.01688   -0.01352
AFIX 137
H24A  2    0.116994    0.551150    0.402078    11.00000   -1.50000
H24B  2    0.047730    0.493704    0.430516    11.00000   -1.50000
H24C  2   -0.009139    0.550113    0.376829    11.00000   -1.50000
AFIX   0
C25   1    0.327570    0.529920    0.210633    11.00000    0.02380    0.02360 =
         0.04768   -0.01117    0.01774   -0.00902
AFIX  23
H25A  2    0.357520    0.574142    0.232420    11.00000   -1.20000
H25B  2    0.387757    0.499702    0.205527    11.00000   -1.20000
AFIX   0
C26   1    0.263030    0.547896    0.142012    11.00000    0.05657    0.02444 =
         0.04053    0.00071    0.02596   -0.01236
AFIX 137
H26A  2    0.309242    0.569585    0.115757    11.00000   -1.50000
H26B  2    0.206479    0.580962    0.146020    11.00000   -1.50000
H26C  2    0.231746    0.504736    0.120001    11.00000   -1.50000
AFIX   0
C27   1    0.343854    0.468111    0.321146    11.00000    0.02668    0.02109 =
         0.03563   -0.01145   -0.00724    0.00513
AFIX  23
H27A  2    0.301790    0.450651    0.352589    11.00000   -1.20000
H27B  2    0.386044    0.427988    0.310249    11.00000   -1.20000
AFIX   0
C28   1    0.420754    0.525089    0.356284    11.00000    0.03186    0.03570 =
         0.05219   -0.02063   -0.01258    0.00134
AFIX 137
H28A  2    0.469257    0.538620    0.327950    11.00000   -1.50000
H28B  2    0.461572    0.506435    0.398368    11.00000   -1.50000
H28C  2    0.380392    0.566488    0.364904    11.00000   -1.50000
AFIX   0
C29   1    0.459800    0.326481    0.272017    11.00000    0.01344    0.01173 =
         0.01545    0.00033    0.00425    0.00083
C30   1    0.432304    0.286676    0.325080    11.00000    0.01346    0.01236 =
         0.01759    0.00019    0.00570   -0.00017
C31   1    0.327842    0.248129    0.328997    11.00000    0.01389    0.01427 =
         0.01588    0.00198    0.00472   -0.00183
C32   1    0.357299    0.205384    0.395055    11.00000    0.01651    0.01775 =
         0.01629    0.00332    0.00471   -0.00185
AFIX  23
H32A  2    0.307699    0.217391    0.423791    11.00000   -1.20000
H32B  2    0.351116    0.154246    0.385343    11.00000   -1.20000
AFIX   0
C33   1    0.472124    0.223109    0.431294    11.00000    0.01575    0.01990 =
         0.01635    0.00421    0.00402   -0.00112
C34   1    0.506652    0.274438    0.383933    11.00000    0.01595    0.01683 =
         0.01547    0.00121    0.00567    0.00013
C35   1    0.607071    0.303758    0.395214    11.00000    0.01512    0.02273 =
         0.01480    0.00147    0.00122   -0.00144
AFIX  43
H35   2    0.654295    0.298995    0.437169    11.00000   -1.20000
AFIX   0
C36   1    0.637341    0.339995    0.344486    11.00000    0.01332    0.01676 =
         0.01812   -0.00069    0.00335   -0.00160
C37   1    0.746980    0.370558    0.348173    11.00000    0.01441    0.02208 =
         0.01937    0.00167    0.00351   -0.00466
C38   1    0.750216    0.374269    0.274236    11.00000    0.01350    0.02215 =
         0.02015    0.00331    0.00446   -0.00206
AFIX  23
H38A  2    0.787915    0.332651    0.261827    11.00000   -1.20000
H38B  2    0.788538    0.417216    0.265478    11.00000   -1.20000
AFIX   0
C39   1    0.633875    0.375953    0.232400    11.00000    0.01323    0.01634 =
         0.01646    0.00239    0.00444   -0.00038
C40   1    0.568212    0.349000    0.282470    11.00000    0.01510    0.01237 =
         0.01609    0.00036    0.00552   -0.00080
C41   1    0.239337    0.301022    0.334911    11.00000    0.01532    0.01887 =
         0.02090    0.00267    0.00666   -0.00020
AFIX  23
H41A  2    0.262653    0.328277    0.376387    11.00000   -1.20000
H41B  2    0.230869    0.334705    0.297515    11.00000   -1.20000
AFIX   0
C42   1    0.130989    0.268463    0.335081    11.00000    0.01737    0.02783 =
         0.02987    0.00373    0.00888   -0.00063
AFIX 137
H42A  2    0.100909    0.248534    0.291274    11.00000   -1.50000
H42B  2    0.083432    0.304947    0.345524    11.00000   -1.50000
H42C  2    0.139274    0.231069    0.368556    11.00000   -1.50000
AFIX   0
C43   1    0.289256    0.198564    0.269793    11.00000    0.01956    0.01770 =
         0.01761    0.00049    0.00472   -0.00481
AFIX  23
H43A  2    0.230498    0.169557    0.279143    11.00000   -1.20000
H43B  2    0.260065    0.227690    0.230281    11.00000   -1.20000
AFIX   0
C44   1    0.372697    0.149248    0.252818    11.00000    0.03266    0.01605 =
         0.02542   -0.00146    0.00969   -0.00177
AFIX 137
H44A  2    0.340952    0.120989    0.213847    11.00000   -1.50000
H44B  2    0.399333    0.117933    0.290482    11.00000   -1.50000
H44C  2    0.431441    0.177120    0.243214    11.00000   -1.50000
AFIX   0
C45   1    0.481191    0.254861    0.500913    11.00000    0.02170    0.03197 =
         0.01718    0.00199    0.00474   -0.00506
AFIX  23
H45A  2    0.449510    0.221204    0.527726    11.00000   -1.20000
H45B  2    0.557322    0.259275    0.522118    11.00000   -1.20000
AFIX   0
C46   1    0.429215    0.326222    0.503712    11.00000    0.04001    0.03296 =
         0.02545   -0.00632    0.01144   -0.00370
AFIX 137
H46A  2    0.459721    0.360346    0.477482    11.00000   -1.50000
H46B  2    0.441534    0.342227    0.549859    11.00000   -1.50000
H46C  2    0.352823    0.322179    0.485605    11.00000   -1.50000
AFIX   0
C47   1    0.543872    0.157087    0.436413    11.00000    0.02134    0.02478 =
         0.02556    0.00783    0.00400    0.00329
AFIX  23
H47A  2    0.539042    0.138101    0.391213    11.00000   -1.20000
H47B  2    0.618205    0.171898    0.453625    11.00000   -1.20000
AFIX   0
C48   1    0.518022    0.097611    0.480456    11.00000    0.03352    0.02574 =
         0.02835    0.00994    0.00249    0.00188
AFIX 137
H48A  2    0.443506    0.083996    0.465534    11.00000   -1.50000
H48B  2    0.530599    0.113898    0.526524    11.00000   -1.50000
H48C  2    0.563412    0.056863    0.477507    11.00000   -1.50000
AFIX   0
C49   1    0.753523    0.445856    0.378526    11.00000    0.02476    0.02475 =
         0.02625   -0.00233    0.00560   -0.00943
AFIX  23
H49A  2    0.825434    0.464694    0.379981    11.00000   -1.20000
H49B  2    0.702678    0.476411    0.348272    11.00000   -1.20000
AFIX   0
C50   1    0.731036    0.452006    0.447860    11.00000    0.05198    0.03262 =
         0.02784   -0.00735    0.00856   -0.01284
AFIX 137
H50A  2    0.736011    0.501542    0.461707    11.00000   -1.50000
H50B  2    0.783068    0.424094    0.479086    11.00000   -1.50000
H50C  2    0.659591    0.434330    0.447301    11.00000   -1.50000
AFIX   0
C51   1    0.837592    0.325069    0.388285    11.00000    0.01470    0.03501 =
         0.02191    0.00505    0.00123   -0.00294
AFIX  23
H51A  2    0.905752    0.347756    0.386119    11.00000   -1.20000
H51B  2    0.831785    0.325510    0.435288    11.00000   -1.20000
AFIX   0
C52   1    0.841781    0.248629    0.366598    11.00000    0.02623    0.03534 =
         0.03127    0.00840    0.00030    0.00754
AFIX 137
H52A  2    0.857304    0.246973    0.322245    11.00000   -1.50000
H52B  2    0.773262    0.226021    0.365594    11.00000   -1.50000
H52C  2    0.897475    0.223661    0.397989    11.00000   -1.50000
AFIX   0
C53   1    0.608456    0.452481    0.207857    11.00000    0.01779    0.01585 =
         0.02321    0.00272    0.00658   -0.00052
AFIX  23
H53A  2    0.531717    0.455734    0.187896    11.00000   -1.20000
H53B  2    0.623343    0.484379    0.246708    11.00000   -1.20000
AFIX   0
C54   1    0.670136    0.478891    0.157034    11.00000    0.02301    0.01921 =
         0.02411    0.00550    0.00718   -0.00083
AFIX 137
H54A  2    0.648844    0.451848    0.115870    11.00000   -1.50000
H54B  2    0.746289    0.472744    0.174818    11.00000   -1.50000
H54C  2    0.654696    0.528960    0.147933    11.00000   -1.50000
AFIX   0
C55   1    0.623960    0.324114    0.173387    11.00000    0.01569    0.01845 =
         0.01714    0.00065    0.00619    0.00058
AFIX  23
H55A  2    0.553847    0.331185    0.143363    11.00000   -1.20000
H55B  2    0.678589    0.336432    0.148303    11.00000   -1.20000
AFIX   0
C56   1    0.635735    0.245874    0.191847    11.00000    0.02246    0.01929 =
         0.02790   -0.00059    0.01147    0.00042
AFIX 137
H56A  2    0.621213    0.217279    0.151371    11.00000   -1.50000
H56B  2    0.585388    0.233514    0.219318    11.00000   -1.50000
H56C  2    0.708140    0.236756    0.216668    11.00000   -1.50000
AFIX   0
HKLF 4


REM  Silanol
REM wR2 = 0.1147, GooF = S = 1.048, Restrained GooF = 1.048 for all data
REM R1 = 0.0455 for 9996 Fo > 4sig(Fo) and 0.0657 for all 12940 data
REM 563 parameters refined using 3 restraints

END

WGHT      0.0505      1.2585

REM Highest difference peak  0.427,  deepest hole -0.260,  1-sigma level  0.045
Q1    1   0.4180  0.3374  0.2303  11.00000  0.05    0.43
Q2    1   0.7436  0.4037  0.3669  11.00000  0.05    0.33
Q3    1  -0.0804  0.2871  0.1141  11.00000  0.05    0.32
Q4    1   0.4741  0.2786  0.3508  11.00000  0.05    0.32
Q5    1   0.6916  0.3513  0.3509  11.00000  0.05    0.32
Q6    1   0.0712  0.2868  0.0626  11.00000  0.05    0.31
Q7    1   0.6865  0.3730  0.2564  11.00000  0.05    0.31
Q8    1   0.0770  0.4873  0.3034  11.00000  0.05    0.31
Q9    1   0.0890  0.4759  0.2473  11.00000  0.05    0.31
Q10   1   0.1622  0.2998  0.0582  11.00000  0.05    0.31
;
_shelx_res_checksum   53942

_shelx_hkl_file
;
   0   0   2 15137.2 36.1401   2
   0   0  -2-1.03600 0.94353   2
   0   0  -3 3.06616 3.72811   5
   0   0   3-0.45801 1.27143   8
   0   0  -3 0.46551 1.11615   8
   0   0  -3 0.58690 1.67497   2
   0   0   3 0.19032 1.85787   2
   0   0  -4 1047.81 92.4600   5
   0   0   4 975.256 91.6467  12
   0   0   4 1160.91 90.9436  10
   0   0  -4 1123.41 90.9051  10
   0   0  -4 1170.61 90.9958   8
   0   0   4 1193.85 90.9896   8
   0   0  -4 1144.99 91.4712   2
   0   0   4 1167.70 91.4481   2
   0   0  -5-0.66396 3.04181   2
   0   0   5 0.31639 2.97840   2
   0   0  -5-4.50394 4.74624  13
   0   0   5-0.44900 3.33902  12
   0   0  -5-0.65601 5.46086   5
   0   0   5 4.63014 4.65289   5
   0   0  -5 0.17571 1.77986  10
   0   0  -5-0.42867 1.67000  11
   0   0   5-0.71276 1.74541  11
   0   0   5 0.18111 1.85235  10
   0   0  -5 1.16256 1.71077   8
   0   0   5-0.56167 1.87796   8
   0   0   6 3018.51 245.921  12
   0   0  -6 2912.58 246.079  13
   0   0  -6 3121.62 244.336  11
   0   0   6 3155.88 244.338  11
   0   0   6 3068.59 244.535  10
   0   0  -6 3093.64 244.497  10
   0   0  -6 3203.32 245.429   2
   0   0   6 3033.61 245.210   2
   0   0   6 3057.20 244.551   8
   0   0  -6 2999.27 244.588   8
   0   0   6 2955.03 246.453   5
   0   0  -6 2988.20 246.989   5
   0   0   7 3.79787 4.29187  12
   0   0  -7 0.94116 6.00015   5
   0   0   7 0.57671 1.87646  11
   0   0   7 1.01239 2.24420  10
   0   0  -7-1.92124 1.85558  11
   0   0  -7 0.24176 2.30137  10
   0   0   7 0.76652 2.06466   8
   0   0  -7-0.11849 1.31199   4
   0   0   7-3.53542 3.36468   2
   0   0  -7 1.90521 3.34450   2
   0   0  -7 5.37579 4.33357   3
   0   0   8 895.850 73.2284  12
   0   0  -8 868.211 70.9968  11
   0   0  -8 906.816 70.6274   4
   0   0  -8 845.339 74.5983   5
   0   0   8 884.384 71.0226  11
   0   0  -8 836.982 71.2312  10
   0   0   8 929.030 71.3984  10
   0   0   8 849.512 71.3202   8
   0   0   8 882.403 72.2912   2
   0   0  -8 916.280 72.5770   2
   0   0   9-3.82127 5.56927  13
   0   0   9-1.64746 4.65890  12
   0   0  -9 2.11695 2.10436  11
   0   0  -9-1.24392 6.65859   5
   0   0   9-2.92776 2.54786  10
   0   0   9 0.47414 1.97462  11
   0   0  -9-1.52785 2.30062  10
   0   0   9-2.86398 2.46518   8
   0   0  -9-0.39739 1.39897   4
   0   0 -10 547.194 45.3533  11
   0   0 -10 570.992 44.8270   4
   0   0 -10 529.135 50.1115   5
   0   0  10 562.382 45.3875  11
   0   0 -10 544.986 45.6851  10
   0   0  10 583.825 45.9300  10
   0   0  10 538.592 45.7392   8
   0   0  10 546.047 48.8733  13
   0   0  10 546.330 48.3208  12
   0   0 -11 1.34961 1.95835  11
   0   0 -11 0.12668 1.22357   4
   0   0 -11-3.12777 7.97204   5
   0   0  11 0.27641 2.01807  11
   0   0  11-1.59428 2.49899  10
   0   0 -11 0.36791 2.34555  10
   0   0  11-4.73037 5.95059  13
   0   0  11-3.05123 5.38035  12
   0   0  11 1.50105 2.31264   8
   0   0 -12 138.962 11.8374  11
   0   0 -12 155.522 18.6397   5
   0   0  12 137.271 15.5163   6
   0   0  12 134.014 12.4998  10
   0   0 -12 123.448 12.1566  10
   0   0  12 117.716 12.1278   8
   0   0  12 135.288 15.2304  12
   0   0  12 148.519 16.5810  13
   0   0 -13 1.74745 2.07301  11
   0   0 -13 2.32307 2.48321  11
   0   0  13 2.40064 6.34988   6
   0   0 -13-9.47988 10.3819   5
   0   0 -13-2.13809 2.74882  10
   0   0  13-0.94301 3.03086  10
   0   0  13 2.44324 4.78249  12
   0   0  13-4.27733 6.04753  13
   0   0  13-2.98693 2.28446   8
   0   0  14 57.1483 11.7759  13
   0   0  14 74.0643 11.2177  12
   0   0 -14 74.1855 7.26917  11
   0   0 -14 68.4390 14.8337   5
   0   0  14 88.1158 12.3477   6
   0   0  15-3.34898 7.48647  13
   0   0  15 1.43076 5.83947  12
   0   0 -15-4.50071 9.89198   5
   0   0  15 4.29454 7.39026   6
   0   0  16 3.08326 6.77990  12
   0   0  16 5.42248 7.38004  13
   0   0 -16 2.43119 10.8716   5
   0   0  16-1.54792 7.68861   6
   0   0  17-4.94824 6.99608  12
   0   0  17 3.88923 7.93678  13
   0   0  17 3.32903 8.37566   6
   0   0 -17 2.61524 10.2380   5
   0   0  18 390.433 38.2701  12
   0   0  18 377.834 39.3552  13
   0   0  18 384.007 38.5220   6
   0   0 -18 390.902 42.2844   5
   0   0  19-6.66404 9.42273  13
   0   0  19-3.77068 7.99775  12
   0   0 -19 15.0287 12.9834   5
   0   0  19-1.88770 9.37372   6
   0   0  20 52.1724 12.3369  12
   0   0  20 40.2881 12.7842  13
   0   0  20 51.7473 12.5622   6
   0   0 -20 6.40462 14.4276   5
   0   0  21 8.50599 9.97258  12
   0   0  21-15.0787 12.6465  13
   0   0 -21 17.0081 12.7251   5
   0   0  22 411.001 43.2873  13
   0   0  22 394.274 41.2879  12
   0   0 -22 383.170 46.6383   5
   0   0  23 9.52166 10.8225  12
   0   0  23-5.65929 12.0054  13
   0   0 -23-19.0955 17.6372   5
   0   0  24 400.978 44.0976  13
   0   0  24 443.993 42.7478  12
   0   0 -24 314.145 46.3698   5
   0   0  25 9.44903 13.1140  13
   0   0  25-15.8406 11.4085  12
   0   0 -25 16.9796 16.9783   7
   0   0 -25-8.47503 17.9765   5
   0   0  26 19.9118 12.7412  13
   0   0  26 8.31824 10.8959  12
   0   0 -26 36.0514 21.7827   7
   0   0 -26-4.46109 17.1063   5
   0   1   2 43.8514 4.86824   6
   0   1  -2 45.8177 4.81706   5
   0  -1   2 53.3844 4.69499   5
   0   1   2 57.4111 5.47755   5
   0   1   2 42.9364 4.43633  12
   0  -1   2 52.0097 4.44665  11
   0   1  -2 23.6154 3.98134  11
   0  -1  -2 48.7140 4.28833   3
   0   1   2 52.4830 4.42979   3
   0   1   2 56.4460 5.14835   7
   0  -1  -3 0.16425 1.65291   2
   0   1   3-0.15217 1.66642   2
   0   1   3 4.33405 2.49177  12
   0  -1   3-2.20939 3.11303   5
   0   1   3 0.32683 2.92245   6
   0   1  -3 1.20410 2.74721   7
   0   1  -3-0.34579 3.19337   5
   0  -1   3 1.46226 1.43797  10
   0  -1   3 0.69069 1.89100  11
   0   1  -3 0.12121 1.32747  10
   0   1  -3-0.70812 1.77569  11
   0  -1  -3-0.47436 1.69764  10
   0   1   3-0.32389 3.49741   7
   0  -1  -3-1.14664 1.30366   8
   0   1   3 0.45257 1.37914   8
   0  -1  -3-3.57691 3.42989   7
   0  -1  -3 0.45884 2.11043   3
   0  -1  -4 898.455 71.4233   3
   0   1   4 916.252 70.9925   2
   0  -1  -4 861.979 71.0042   2
   0  -1   4 906.636 71.4578   2
   0   1   4 851.871 71.5393  12
   0  -1  -4 834.449 71.5276  12
   0   1  -4 959.297 71.8940  13
   0   1  -4 861.411 70.9069  11
   0   1  -4 909.160 72.2354   5
   0   1   4 837.112 71.7490   6
   0  -1   4 905.815 71.9507   5
   0  -1   4 966.575 70.9695  11
   0  -1   4 877.457 70.6519  10
   0   1  -4 903.660 70.6653  10
   0  -1  -4 891.950 70.8208  10
   0  -1  -4 887.953 70.5652   9
   0   1   4 868.642 70.5691   9
   0  -1  -4 861.302 70.6178   8
   0   1  -4 915.408 71.8783   7
   0  -1  -4 769.802 71.8986   7
   0   1   4 880.025 70.6153   8
   0   1   4 842.266 71.7568   7
   0  -1  -5 4232.67 340.660   2
   0  -1  -5 4089.93 341.013   3
   0  -1   5 4270.77 341.039   2
   0   1   5 4094.58 340.603   2
   0   1   5 4354.54 341.354  12
   0   1  -5 4291.82 341.519  13
   0  -1  -5 4288.78 341.337  12
   0   1  -5 4421.84 340.443  11
   0  -1   5 4126.93 341.651   5
   0   1  -5 4274.32 342.082   5
   0   1   5 4604.00 341.688   6
   0   1  -5 4327.45 340.152  10
   0  -1   5 4254.59 340.139  10
   0  -1   5 4317.33 340.394  11
   0   1   5 4375.06 340.398  10
   0  -1  -5 4365.06 340.325  10
   0   1   5 4354.30 340.013   9
   0  -1  -5 4247.99 339.954   9
   0  -1  -5 4245.37 340.153   8
   0  -1   5 4364.45 340.416   8
   0   1   5 4224.69 340.104   8
   0   1   5 4315.90 341.559   7
   0   1  -5 4160.48 341.621   7
   0  -1  -5 3911.59 341.753   7
   0  -1   6 1777.12 147.594   2
   0  -1  -6 1811.64 147.788   3
   0  -1  -6 1884.30 147.365   2
   0   1   6 1786.75 147.238   2
   0  -1  -6 1871.68 146.596   4
   0   1   6 1781.86 148.072  12
   0  -1   6 1767.26 148.381  13
   0  -1  -6 1870.19 148.114  12
   0   1  -6 1875.24 148.359  13
   0   1  -6 1898.83 146.946  11
   0   1   6 2018.74 148.540   6
   0  -1   6 1773.59 148.520   5
   0   1  -6 1870.41 149.157   5
   0   1   6 1801.62 146.889  10
   0  -1   6 1851.25 146.669  10
   0  -1   6 1874.37 146.880  11
   0  -1  -6 1823.01 146.806  10
   0   1  -6 1869.39 146.667  10
   0  -1   6 1826.13 146.925   8
   0  -1  -6 1785.81 146.337   9
   0   1   6 1903.51 146.435   9
   0  -1  -6 1813.36 146.674   8
   0   1  -6 1780.50 148.457   7
   0  -1  -6 1700.54 148.695   7
   0   1   6 1871.13 148.300   7
   0   1   6 1830.90 146.615   8
   0  -1  -7 51.8746 4.94120   4
   0  -1  -7 49.4184 5.91803   2
   0  -1   7 58.4317 6.77474   2
   0  -1  -7 41.1826 6.65123   3
   0   1   7 50.1712 5.97291   2
   0  -1   7 50.1477 7.42720  13
   0  -1   7 37.2131 6.91767  12
   0   1   7 62.2132 7.43826  12
   0   1  -7 46.1941 8.35431   5
   0  -1   7 46.5324 8.14924   5
   0   1   7 53.1154 7.66311   6
   0  -1  -7 42.0525 5.18945  10
   0   1   7 55.6911 5.46447  10
   0  -1   7 44.2559 5.29866  11
   0  -1   7 43.7146 4.94480  10
   0   1  -7 42.7195 4.92249  10
   0   1  -7 41.9619 5.22777  11
   0  -1  -7 40.9498 4.92509   8
   0   1   7 49.6017 4.65684   9
   0  -1   7 38.2243 5.19143   8
   0   1   7 46.7682 5.00554   8
   0  -1  -7 43.9856 8.49292   7
   0   1  -7 51.2018 7.88234   7
   0  -1  -8 223.070 21.6074   2
   0  -1  -8 257.814 20.5458   4
   0  -1   8 236.458 21.9758   2
   0   1   8 250.730 21.6543   2
   0  -1   8 269.378 23.1396  12
   0  -1   8 226.529 23.1194  13
   0   1   8 253.617 22.7646  12
   0   1  -8 251.896 20.9719  11
   0   1   8 268.181 23.3187   6
   0   1  -8 256.228 24.5682   5
   0  -1  -8 232.749 20.8386  10
   0  -1   8 248.539 20.7673  10
   0   1   8 264.579 21.1348  10
   0   1  -8 239.188 20.7154  10
   0  -1   8 232.888 20.9050  11
   0   1   8 252.233 20.3153   9
   0  -1  -8 260.852 20.8807   8
   0  -1   8 242.727 21.0578   8
   0   1   8 226.286 20.6172   8
   0  -1  -8 234.677 23.9620   7
   0  -1  -9 40.5032 4.44380   4
   0  -1  -9 38.4151 5.89034   2
   0   1   9 41.3682 5.84244   2
   0   1   9 40.6634 7.36446  12
   0  -1   9 44.3662 8.24544  13
   0  -1   9 41.5533 7.13679  12
   0  -1  -9 45.2556 3.93369  11
   0   1  -9 28.9605 8.86617   5
   0   1   9 31.5391 7.13279   6
   0  -1  -9 39.7988 9.30590   5
   0   1  -9 40.1453 4.81690  10
   0  -1   9 46.0093 5.01254  11
   0  -1   9 34.7534 4.68534  10
   0   1  -9 38.3901 4.96097  11
   0  -1  -9 35.4612 4.82674  10
   0   1   9 36.9198 4.08241   9
   0  -1  -9 31.8940 4.70886   8
   0  -1   9 34.8326 5.00432   8
   0   1   9 44.1317 4.71710   8
   0  -1  -9 43.4103 8.75169   7
   0  -1 -10 19.8844 2.99621   4
   0  -1 -10 21.4524 5.09374   2
   0   1  10 12.6990 5.59903  12
   0  -1  10 21.5945 6.29117  13
   0  -1  10 20.8267 6.50393  12
   0  -1 -10 19.2385 2.47730  11
   0  -1 -10 18.2039 2.50353  11
   0   1  10 26.6024 6.84109   6
   0  -1 -10 17.2735 7.93975   5
   0   1 -10 9.53772 7.85293   5
   0   1 -10 18.6542 3.42894  10
   0  -1  10 22.4950 3.58059  10
   0  -1 -10 15.2867 3.45183  10
   0  -1  10 21.7622 3.62352  11
   0   1 -10 18.2202 3.58318  11
   0  -1 -10 14.6598 3.37767   8
   0   1  10 18.8430 2.65066   9
   0  -1  10 26.2237 3.96965   8
   0   1  10 20.0851 3.35164   8
   0  -1 -10 17.8060 7.49562   7
   0  -1 -11 116.984 11.3249   2
   0  -1 -11 106.438 8.75723   4
   0  -1  11 99.3809 12.9641  13
   0  -1  11 106.800 12.7653  12
   0   1  11 76.4167 11.4488  12
   0  -1 -11 89.7146 8.29903  11
   0   1 -11 91.3681 9.28759  11
   0  -1 -11 95.0719 8.25555  11
   0   1 -11 85.2659 13.9759   5
   0  -1 -11 59.3191 13.2735   5
   0   1  11 102.172 12.5531   6
   0  -1 -11 102.035 9.47401  10
   0  -1  11 103.661 9.39990  11
   0   1 -11 93.3594 9.18915  10
   0  -1  11 95.9153 9.33648  10
   0   1  11 96.0236 8.34752   9
   0  -1  11 90.2825 9.44949   8
   0  -1 -11 91.9372 9.30285   8
   0  -1 -11 103.388 14.2589   7
   0   1  11 82.7764 8.99562   8
   0  -1  12 447.965 43.8570  13
   0   1  12 478.296 43.1865  12
   0  -1  12 488.521 43.5118  12
   0   1  12 401.009 43.2355  13
   0  -1 -12 482.423 39.2844  11
   0   1 -12 487.320 40.2709  11
   0  -1 -12 500.560 39.2256  11
   0   1  12 460.743 43.4764   6
   0  -1 -12 508.880 46.5875   5
   0   1 -12 502.316 46.1729   5
   0  -1 -12 518.511 39.6167   4
   0  -1  12 476.960 40.2369  11
   0  -1 -12 470.970 40.3196  10
   0   1 -12 516.700 40.3475  10
   0  -1  12 522.908 40.4839  10
   0  -1  12 487.183 40.5429   8
   0   1  12 476.928 39.1860   9
   0  -1 -12 529.205 45.9521   7
   0   1  12 431.921 40.0182   8
   0   1 -13 59.2766 6.54445  11
   0  -1 -13 52.6780 5.13771  11
   0  -1 -13 55.3483 5.14643  11
   0   1  13 62.0663 10.6283   6
   0  -1 -13 57.0550 5.52571   4
   0  -1 -13 60.1382 13.3928   5
   0   1 -13 63.2338 12.9880   5
   0   1 -13 63.8503 6.65448  10
   0  -1 -13 54.3147 6.49975  10
   0  -1  13 47.0311 6.23262  11
   0  -1  13 58.5000 6.66375  10
   0   1  13 55.7238 10.4892  13
   0  -1  13 45.1357 9.15551  12
   0   1  13 62.6342 9.45801  12
   0  -1  13 63.3667 10.5582  13
   0   1  13 48.1572 6.15498   8
   0  -1 -13 47.0556 11.1410   7
   0  -1  13 53.4956 6.56169   8
   0   1 -14 478.442 39.2125  11
   0  -1 -14 445.523 37.8763  11
   0   1  14 461.875 43.2870   6
   0   1 -14 481.577 46.2410   5
   0  -1 -14 482.778 38.1803   4
   0  -1 -14 492.056 46.6944   5
   0  -1  14 494.704 39.5396  10
   0  -1  14 498.191 44.7204  13
   0   1  14 514.076 43.2012  12
   0  -1  14 466.441 43.0063  12
   0   1  14 451.938 43.7795  13
   0  -1 -14 509.736 45.9920   7
   0   1 -15 297.371 26.4433  11
   0   1  15 296.920 30.8031   6
   0   1 -15 280.459 33.5613   5
   0  -1 -15 313.466 34.6871   5
   0  -1  15 385.318 31.8063   6
   0   1  15 295.135 31.6295  13
   0   1  15 328.836 30.7940  12
   0  -1  15 320.527 30.9152  12
   0  -1  15 283.288 31.4419  13
   0  -1 -15 304.357 33.9047   7
   0  -1  15 317.378 26.9273  10
   0   1  16 893.018 79.7515   6
   0   1 -16 922.279 83.3095   5
   0  -1  16 939.160 79.4284   6
   0  -1 -16 906.000 83.5372   5
   0  -1 -16 969.526 83.0665   7
   0  -1  16 857.807 80.1649  13
   0   1  16 932.559 79.3811  12
   0  -1  16 938.489 79.7410  12
   0   1  16 911.543 80.4124  13
   0  -1 -17 186.217 28.4345   5
   0   1  17 235.649 26.1442   6
   0   1 -17 229.710 29.4234   5
   0  -1  17 253.529 26.1936   6
   0  -1 -17 243.617 29.5258   7
   0  -1  17 217.811 25.5019  12
   0   1  17 214.858 25.0773  12
   0   1  17 298.429 28.4484  13
   0  -1  17 246.474 27.3725  13
   0   1 -18 41.5461 14.1602   5
   0   1  18 3.66332 9.27951   6
   0  -1 -18 2.84902 12.3529   5
   0  -1  18 15.4623 8.71190   6
   0  -1 -18 5.37971 11.0311   7
   0  -1  18 18.0585 8.66261  12
   0  -1  18 20.9682 8.79379  13
   0   1  18 6.20953 8.51637  13
   0   1  18 19.1204 8.34334  12
   0  -1  19 288.624 32.6742   6
   0   1 -19 284.465 37.1273   5
   0   1  19 343.344 34.4773   6
   0  -1 -19 289.771 37.2274   5
   0  -1 -19 312.250 37.6604   7
   0   1  19 338.735 35.1717  13
   0  -1  19 331.703 35.1955  13
   0  -1  19 315.704 33.5542  12
   0   1  19 335.813 33.4725  12
   0  -1 -20 1461.56 134.295   5
   0   1  20 1564.06 129.902   6
   0   1 -20 1485.72 134.310   5
   0  -1 -20 1545.09 134.363   7
   0   1  20 1486.65 129.035  12
   0  -1  20 1533.62 131.015  13
   0   1  20 1549.49 131.076  13
   0  -1  20 1530.00 129.794  12
   0   1 -21 26.9525 16.4068   5
   0  -1 -21 17.2390 14.5057   5
   0  -1 -21 30.0880 15.0960   7
   0   1  21 15.0410 11.9441  13
   0  -1  21 51.9980 12.8061  12
   0   1  21 25.1334 10.4742  12
   0  -1  21 22.8653 11.7391  13
   0  -1 -22 193.363 27.8636   5
   0   1 -22 157.148 26.4203   5
   0  -1 -22 104.157 23.4487   7
   0   1  22 122.053 19.8926  12
   0   1  22 133.190 21.4593  13
   0  -1  22 150.946 23.1606  13
   0  -1  22 139.904 20.5306  12
   0   1 -23 7.55170 15.1276   5
   0  -1 -23 27.0469 17.8654   5
   0  -1 -23 3.85004 16.3560   7
   0  -1  23 29.0555 11.8947  12
   0   1  23 2.82579 11.7979  13
   0  -1  23 22.7465 12.9554  13
   0   1  23 2.34604 10.7024  12
   0  -1 -24 150.669 29.8400   5
   0   1 -24 179.263 30.0308   5
   0  -1  24 180.241 26.1410  13
   0  -1  24 158.189 23.3514  12
   0   1  24 155.050 25.0680  13
   0   1  24 163.452 23.4143  12
   0  -1 -24 182.098 30.5943   7
   0  -1 -25 98.4988 25.7514   5
   0   1 -25 147.177 27.5665   5
   0  -1  25 123.343 20.5302  12
   0  -1  25 101.309 20.5874  13
   0   1  25 110.286 21.4541  13
   0   1  25 106.904 18.6645  12
   0  -1 -25 107.734 25.8940   7
   0  -1 -25 101.701 19.7878   1
   0  -1 -26-17.9799 20.7584   5
   0   1 -26-17.6667 16.9132   5
   0  -1 -26 8.49512 11.0904   1
   0  -1  26 3.33116 13.3252  13
   0   1  26-6.64889 14.3632  13
   0   1  26-10.9631 10.9653  12
   0  -1  26 5.62173 11.0089  12
   0  -1 -26-9.15244 17.1212   7
   0   2   0 7948.61 642.043  11
   0   2   0 8297.96 642.174   1
   0  -2   0 8048.42 642.143   6
   0   2   1 17341.1 1293.27  12
   0   2   1 18829.8 1293.48   5
   0  -2   1 18227.1 1293.21   6
   0  -2  -1 17064.9 1293.43   5
   0   2  -1 16209.7 1293.12   6
   0   2   1 18036.5 1293.29   1
   0  -2  -1 18727.2 1293.13  11
   0   2  -1 17399.3 1293.23  10
   0  -2   1 18165.8 1293.30  10
   0   2   1 19163.3 1293.18  11
   0   2   1 18172.3 1293.37   9
   0  -2   1 18458.6 1293.30   9
   0   2  -1 14654.0 1293.14   9
   0   2   1 18294.5 1293.69   7
   0   2   2 7192.18 567.416   3
   0  -2  -2 7109.66 567.360   3
   0  -2  -2 6936.91 567.791  12
   0   2   2 7212.84 567.848  12
   0   2   2 7358.11 568.239   5
   0   2  -2 7049.67 567.617   5
   0  -2  -2 7040.68 568.260   5
   0  -2  -2 6819.71 567.833   1
   0   2   2 7468.66 567.925   1
   0  -2   2 6974.95 567.801  11
   0   2  -2 7022.64 567.534  10
   0   2  -2 7029.94 567.815  11
   0  -2   2 7213.09 567.598  10
   0  -2  -2 7215.85 567.643   9
   0   2   2 7166.45 567.663   9
   0   2  -2 7306.94 567.567   9
   0  -2   2 7254.38 567.556   9
   0  -2  -2 7082.82 568.309   7
   0   2   2 7503.75 568.291   7
   0  -2  -3 9.05552 2.50863   3
   0   2   3 9.16101 2.75798   3
   0   2   3 19.3300 3.81518   1
   0   2   3 8.22350 2.06375   2
   0  -2  -3 10.3547 3.29009   1
   0  -2  -3 9.10078 1.97670   2
   0  -2  -3 10.7401 3.24406  12
   0   2   3 11.6695 3.27832  12
   0  -2   3 11.2355 3.28609   5
   0   2   3 9.96545 3.92128   6
   0   2  -3 7.51505 3.19004   5
   0   2   3 8.32885 3.97574   5
   0  -2  -3 7.46428 4.08455   5
   0  -2  -3 9.84467 4.18128   6
   0  -2   3 10.4946 2.88101  11
   0   2  -3 7.57848 2.17163  10
   0  -2   3 6.50104 2.36268  10
   0   2  -3 6.11260 2.80678  11
   0  -2   3 6.95478 2.15932   9
   0  -2  -3 6.21594 2.22326   9
   0   2   3 5.75810 2.41919   9
   0   2  -3 9.19028 2.25683   9
   0  -2  -3 3.89373 4.24580   7
   0   2   3 5.08704 3.87711   7
   0  -2  -4 5205.48 423.605   2
   0  -2  -4 5402.93 424.030   3
   0   2   4 5402.60 424.058   3
   0  -2  -4 5101.06 424.295   1
   0   2   4 5051.93 423.463   2
   0   2   4 5268.22 424.331  12
   0  -2  -4 5300.50 424.319  12
   0   2  -4 5415.66 424.013  11
   0   2  -4 5225.55 424.612   5
   0   2   4 5199.58 425.043   5
   0   2   4 5257.05 424.856   6
   0  -2  -4 5426.42 424.817   6
   0  -2  -4 5100.31 425.217   5
   0  -2   4 5243.07 424.377   5
   0   2  -4 5362.49 423.563  10
   0  -2   4 5512.12 423.633  10
   0  -2   4 5415.21 423.972  11
   0  -2  -4 5468.79 423.645   9
   0   2   4 5353.85 423.647   9
   0  -2   4 5304.55 423.408   9
   0   2  -4 5342.98 423.423   9
   0  -2  -4 5164.90 424.957   7
   0  -2  -4 5462.79 423.534   8
   0   2   4 5311.32 424.745   7
   0   2  -4 5871.98 424.643   7
   0  -2  -5 3193.47 257.600   3
   0  -2  -5 3199.11 257.194   2
   0   2   5 3041.45 256.961   2
   0  -2   5 3370.06 258.521  13
   0  -2  -5 3303.07 258.057  12
   0   2   5 3156.54 257.992  12
   0   2  -5 3362.74 257.505  11
   0  -2  -5 2884.37 258.974   5
   0   2   5 3150.11 258.483   6
   0   2  -5 3250.60 258.573   5
   0   2   5 3241.12 258.879   5
   0  -2   5 3140.05 258.123   5
   0  -2   5 3280.26 256.985  10
   0   2  -5 3248.31 256.963  10
   0  -2  -5 3288.41 257.283  10
   0  -2   5 3186.88 257.340  11
   0   2  -5 3315.06 256.727   9
   0  -2  -5 3379.68 257.000   9
   0  -2   5 3174.43 256.700   9
   0   2   5 3204.09 256.977   9
   0   2   5 3240.47 258.402   7
   0   2  -5 3285.55 258.433   7
   0  -2  -5 3184.54 258.823   7
   0  -2  -5 3241.26 256.912   8
   0  -2   6 150.392 13.8806   2
   0  -2  -6 122.111 13.0603   3
   0   2   6 133.679 12.5155   2
   0  -2  -6 147.425 12.8218   2
   0  -2  -6 128.621 13.6286  12
   0   2   6 127.492 13.7457  12
   0  -2   6 157.750 14.5556  13
   0   2  -6 143.608 12.9124  11
   0   2   6 145.928 15.1188   5
   0   2  -6 152.240 15.0120   5
   0   2   6 135.152 14.5781   6
   0  -2   6 138.415 14.2952   5
   0   2  -6 134.644 12.2723  10
   0  -2  -6 145.819 12.6755  10
   0  -2   6 150.571 12.9982  11
   0  -2   6 144.310 12.3625  10
   0   2  -6 138.628 11.9158   9
   0  -2  -6 145.347 12.2474   9
   0  -2   6 138.316 11.9451   9
   0   2   6 140.986 12.3668   9
   0  -2  -6 141.766 12.2778   8
   0  -2  -6 141.189 15.1005   7
   0   2  -6 149.675 14.3963   7
   0   2   6 145.034 14.3622   7
   0  -2   7 2992.69 236.434   2
   0   2   7 2840.21 235.387   2
   0  -2  -7 2974.20 235.673   2
   0  -2  -7 2895.23 236.140   3
   0  -2   7 3014.33 237.263  13
   0   2   7 2957.03 236.684  12
   0   2  -7 3111.45 235.676  11
   0   2   7 2923.29 237.160   6
   0  -2   7 2875.05 236.940   5
   0   2  -7 2840.15 237.613   5
   0  -2   7 2962.05 235.502  11
   0  -2  -7 2916.87 235.323  10
   0  -2   7 3026.66 235.077  10
   0   2  -7 2963.25 235.062  10
   0  -2   7 2906.79 234.586   9
   0  -2  -7 3042.22 234.924   9
   0  -2   7 3055.65 235.579   8
   0  -2  -7 2983.43 235.038   8
   0   2  -7 2962.12 234.545   9
   0   2   7 2932.93 234.972   9
   0   2  -7 3031.67 237.269   7
   0  -2  -7 2922.32 237.755   7
   0   2   7 2768.60 234.925   8
   0  -2  -8 207.156 17.4056   4
   0   2   8 179.639 17.6672   2
   0  -2  -8 208.069 18.1354   2
   0   2   8 187.437 18.9754  12
   0  -2   8 180.371 19.4819  13
   0   2  -8 191.895 17.6769  11
   0   2   8 191.752 19.7145   6
   0   2  -8 208.990 20.8460   5
   0   2  -8 189.567 17.1928  10
   0  -2  -8 199.335 17.4758  10
   0  -2   8 205.692 17.6888  11
   0  -2   8 215.508 17.2710  10
   0  -2  -8 213.713 17.2795   8
   0   2   8 191.183 17.0145   9
   0  -2   8 205.519 16.5840   9
   0  -2   8 221.494 17.8764   8
   0  -2  -8 191.478 16.8857   9
   0  -2  -8 205.883 20.7968   7
   0   2   8 193.336 17.1062   8
   0   2  -8 208.847 20.1110   7
   0  -2  -9 36.0721 4.62771   4
   0  -2  -9 45.5640 5.83577   2
   0   2   9 29.0147 4.98080   2
   0   2   9 30.2349 6.92324  12
   0  -2   9 43.4448 7.99735  13
   0   2  -9 33.9876 8.87853   5
   0   2   9 34.5125 7.60783   6
   0  -2   9 32.4295 4.93704  11
   0  -2  -9 28.0489 4.59531  10
   0   2  -9 33.4789 4.53706  10
   0   2  -9 36.6313 5.22851  11
   0  -2   9 33.9669 4.50949  10
   0   2   9 37.7213 4.30212   9
   0  -2   9 34.2402 5.03844   8
   0  -2   9 35.1593 3.59650   9
   0  -2  -9 30.7016 3.92840   9
   0  -2  -9 40.9702 9.22214   7
   0   2   9 36.6534 4.38220   8
   0  -2  -9 33.7261 4.44393   8
   0   2  -9 41.3381 7.97884   7
   0  -2 -10 486.270 41.4728   2
   0  -2 -10 539.555 40.4512   4
   0  -2  10 452.699 43.0271  12
   0   2  10 510.719 43.0722  12
   0  -2  10 491.733 43.7015  13
   0   2 -10 486.510 40.8724  11
   0   2  10 480.115 43.3220   6
   0   2 -10 476.838 44.5035   5
   0  -2  10 469.524 40.6904  11
   0  -2  10 486.873 40.3489  10
   0  -2 -10 451.019 40.5000  10
   0   2 -10 483.838 40.3230  10
   0  -2 -10 511.798 40.4629   8
   0   2  10 492.261 40.0157   9
   0  -2  10 533.480 41.0117   8
   0  -2  10 490.532 39.3935   9
   0   2  10 456.857 40.1483   8
   0  -2 -10 478.940 44.4945   7
   0   2 -10 528.352 44.2608   7
   0  -2 -11 131.380 11.9921   4
   0  -2 -11 107.374 12.9707   2
   0   2  11 145.685 15.1465  12
   0  -2  11 95.5833 14.8346  13
   0  -2  11 132.192 15.5420  12
   0   2 -11 132.749 12.5865  11
   0   2 -11 151.776 17.7487   5
   0   2  11 120.471 15.2871   6
   0  -2 -11 129.188 12.3747  10
   0   2 -11 130.315 12.0877  10
   0  -2  11 140.259 12.6084  11
   0  -2  11 143.856 12.2406  10
   0   2  11 127.907 11.5904   9
   0  -2 -11 128.164 12.1338   8
   0  -2  11 143.179 12.7154   8
   0   2  11 124.223 11.9160   8
   0  -2 -11 141.430 17.6711   7
   0   2 -11 135.696 16.1422   7
   0  -2 -12 302.776 26.8395   2
   0  -2 -12 327.235 25.1459   4
   0  -2  12 283.937 28.9440  13
   0   2  12 305.935 28.3119  12
   0  -2  12 282.222 28.4588  12
   0   2 -12 297.452 25.6960  11
   0   2  12 311.802 29.2477   6
   0   2 -12 302.408 30.6492   5
   0   2 -12 303.461 25.2602  10
   0  -2  12 301.315 25.2770  10
   0  -2  12 288.589 25.5371  11
   0  -2 -12 310.622 25.5575  10
   0   2  12 297.450 24.5766   9
   0  -2 -12 256.287 25.0559   8
   0  -2  12 299.427 25.7385   8
   0   2 -12 322.535 30.1065   7
   0   2  12 265.803 24.9288   8
   0  -2 -12 312.309 30.7577   7
   0  -2 -13 7.55835 3.98729   2
   0  -2 -13 7.88144 2.62385   4
   0   2  13 14.4015 5.99149  12
   0  -2  13 8.81165 7.41615  13
   0  -2  13 12.9604 6.88452  12
   0   2 -13 11.8081 3.53673  11
   0   2  13 13.3322 7.24577   6
   0   2 -13 5.46241 8.16455   5
   0  -2  13 9.14576 3.40170  11
   0   2 -13 7.64819 2.96837  10
   0  -2  13 6.05721 2.99947  10
   0  -2 -13 6.38346 3.36381  10
   0   2  13 5.30106 2.15549   9
   0  -2 -13 8.43392 3.05257   8
   0  -2 -13 12.6179 8.08324   7
   0   2 -13 17.6913 7.68037   7
   0   2  13 7.04535 2.89011   8
   0  -2  14 94.0276 13.0238  12
   0   2  14 84.4638 12.0684  12
   0  -2  14 105.251 14.1314  13
   0   2 -14 91.2054 9.62263  11
   0  -2 -14 79.6388 15.8940   5
   0   2 -14 101.651 16.0625   5
   0   2  14 82.0686 12.8956   6
   0  -2  14 91.1146 9.27853  10
   0  -2 -14 90.0716 8.63766   4
   0  -2 -14 71.9279 14.4389   7
   0   2 -14 60.5416 13.4116   7
   0   2 -15 5.90287 3.38370  11
   0  -2  15 0.98291 3.07619  10
   0   2 -15 13.0527 9.23405   5
   0  -2 -15 2.33485 10.2697   5
   0   2  15 3.09457 7.15363   6
   0   2 -15 15.6980 9.61705   7
   0  -2 -15 23.8323 10.7634   7
   0   2  15 7.00591 5.84301  12
   0  -2  15 6.89300 7.04234  13
   0  -2  15 3.02600 5.80385  12
   0   2  15 1.68872 6.76254  13
   0  -2 -16 90.5530 18.2275   5
   0   2 -16 127.226 19.6409   5
   0   2 -16 90.4390 17.2489   7
   0  -2 -16 106.960 18.4008   7
   0   2  16 102.473 14.9456  12
   0   2  16 103.712 16.0677  13
   0  -2  16 125.093 15.8965  12
   0  -2  16 131.679 17.5089  13
   0  -2  17-1.54191 7.12870   6
   0   2  17 12.4074 8.68822   6
   0   2 -17-2.54142 11.9223   5
   0  -2 -17 5.39945 10.1049   5
   0   2 -17 2.35162 10.5198   7
   0  -2 -17-2.55518 11.2376   7
   0   2  17 3.89476 7.46430  13
   0  -2  17 5.21338 7.10146  12
   0   2  17 9.68105 7.45890  12
   0  -2  17 11.9387 9.47727  13
   0  -2  18-3.30860 7.28100   6
   0   2  18 9.41338 8.96823   6
   0   2 -18-2.72953 12.6089   5
   0  -2 -18 14.4844 13.1708   5
   0   2 -18-2.55917 11.8226   7
   0  -2 -18 13.8971 13.6173   7
   0  -2  18 18.5451 9.33865  12
   0   2  18 2.08595 8.52128  13
   0   2  18 12.0691 8.45213  12
   0  -2  18 2.12846 7.77840  13
   0   2 -19-2.93079 12.8857   5
   0   2  19-1.99213 9.05761   6
   0  -2 -19 6.18013 12.6143   5
   0   2 -19 8.32833 12.6196   7
   0  -2 -19 11.8608 11.6108   7
   0   2  19 1.83694 7.50178  12
   0  -2  19-1.97385 9.11806  12
   0   2  19 4.44451 9.77198  13
   0  -2  19 18.1656 10.9686  13
   0   2 -20-9.38213 14.2195   5
   0  -2 -20 9.85711 12.5868   5
   0   2  20 4.21758 10.4790   6
   0   2 -20 11.8141 11.5698   7
   0  -2 -20-9.61274 11.9933   7
   0  -2  20 9.66959 10.2620  13
   0   2  20 9.77280 9.03507  12
   0   2  20 9.48186 9.68388  13
   0  -2  20 4.19081 9.37782  12
   0  -2 -21 227.210 32.1529   5
   0   2  21 208.037 26.6588   6
   0   2 -21 252.922 32.3363   5
   0  -2 -21 214.133 30.8646   7
   0   2 -21 251.618 31.6649   7
   0  -2  21 195.303 25.8914  12
   0   2  21 196.982 25.4028  12
   0   2  21 193.635 27.1954  13
   0  -2  21 248.923 28.3186  13
   0  -2 -22 92.3959 22.9705   5
   0   2 -22 98.8506 22.4770   5
   0  -2 -22 120.482 24.9691   7
   0   2 -22 82.2043 21.0064   7
   0   2  22 128.300 20.4859  13
   0  -2  22 114.220 19.4258  13
   0  -2  22 124.324 19.7397  12
   0   2  22 138.415 19.2654  12
   0  -2 -23 238.035 35.7028   5
   0   2 -23 317.452 38.3859   5
   0  -2 -23 289.952 32.0157   1
   0   2 -23 227.633 35.6073   7
   0  -2 -23 285.421 38.0941   7
   0  -2  23 281.678 33.1457  13
   0   2  23 234.562 31.9885  13
   0   2  23 241.601 29.8807  12
   0  -2  23 268.802 31.5568  12
   0  -2 -24-16.4820 17.4837   5
   0   2 -24-11.8618 15.4862   5
   0  -2 -24-4.98568 11.3400   1
   0  -2 -24 28.7618 20.6806   7
   0   2 -24 3.92166 15.6899   7
   0   2  24-2.99389 11.9822  13
   0   2  24-7.35813 10.6052  12
   0  -2  24 3.03198 12.1344  13
   0  -2  24-15.5643 11.4132  12
   0  -2 -25 103.942 26.2028   5
   0   2 -25 162.392 29.7924   5
   0  -2 -25 160.835 23.5280   1
   0   2 -25 156.314 28.7129   7
   0  -2 -25 140.054 29.1791   7
   0  -2  25 141.572 22.6281  12
   0  -2  25 172.289 25.9329  13
   0   2  25 144.776 22.2026  12
   0   2  25 148.326 24.5196  13
   0  -2 -26-18.1730 21.6817   5
   0   2 -26 30.6239 19.9453   5
   0  -2  26 22.8102 12.6324  12
   0  -2  26 16.6876 13.4394  13
   0   2  26 26.6439 14.9736  13
   0   2  26 43.5039 13.4098  12
   0  -2 -26 13.9426 20.4902   7
   0   2 -26 13.1096 18.6017   7
   0  -2 -26 19.4897 11.9142   1
   0   3   0-1.31345 2.66165  11
   0  -3   0 0.50156 2.49946  11
   0   3   0 2.05985 10.2277   7
   0  -3   0 2.64669 5.99033   7
   0   3   0 2.33459 2.77862   1
   0  -3   0 2.03366 2.92436   6
   0   3   0 0.29676 2.60965   6
   0   3   1 2334.75 180.649   1
   0  -3  -1 2225.02 180.658   1
   0   3  -1 2316.86 180.998   1
   0  -3  -1 2595.22 180.993  12
   0  -3  -1 2232.57 181.015   6
   0  -3   1 1979.14 180.458   6
   0   3   1 2274.19 180.598   5
   0   3  -1 2214.78 180.545   6
   0  -3  -1 2396.58 180.734   5
   0  -3   1 2256.20 180.659  10
   0   3   1 2292.16 180.535  11
   0  -3  -1 2269.38 180.489  11
   0   3  -1 2191.99 180.557  10
   0   3   1 2221.82 180.703   9
   0  -3   1 2324.13 180.674   9
   0   3  -1 2289.57 180.696   9
   0  -3  -1 2258.59 181.726   7
   0   3  -1 2067.47 181.559   7
   0   3   1 2380.16 181.196   7
   0   3   2 231.372 19.1499   3
   0  -3  -2 238.481 19.1101   3
   0   3  -2 227.969 20.4771   1
   0   3   2 245.020 19.9851   1
   0  -3  -2 261.504 20.1002   1
   0  -3  -2 226.446 19.8796  12
   0   3   2 228.334 20.8038  13
   0   3   2 222.133 19.8602  12
   0   3  -2 240.978 20.2115  12
   0  -3   2 223.999 19.6198   6
   0   3   2 251.704 20.4258   5
   0   3  -2 231.988 19.3324   5
   0  -3  -2 212.315 20.2476   5
   0   3  -2 217.275 19.6191  10
   0  -3   2 212.614 19.9578  11
   0  -3  -2 233.518 19.4478  11
   0  -3   2 230.195 19.7771  10
   0   3   2 240.849 19.5275  11
   0   3   2 249.640 19.9653   9
   0   3  -2 232.831 19.7647   9
   0  -3   2 237.072 19.7691   9
   0  -3  -2 243.448 19.9399   9
   0   3   2 228.435 20.6016   7
   0  -3  -2 241.525 20.8504   7
   0   3   3 103.044 9.21755   3
   0  -3  -3 104.008 9.09713   3
   0   3   3 96.4645 10.1913   1
   0  -3  -3 98.0769 10.1602   1
   0  -3  -3 99.9900 9.94173  12
   0   3   3 105.542 10.0521  12
   0   3   3 97.1298 10.6421  13
   0   3  -3 106.690 10.2557  12
   0   3   3 109.118 11.0304   5
   0   3  -3 108.289 9.71601   5
   0   3   3 82.5991 10.6834   6
   0  -3  -3 102.942 10.7692   5
   0  -3   3 92.0026 9.86389  11
   0  -3  -3 102.261 9.00368  11
   0  -3   3 92.0790 9.42324  10
   0   3  -3 105.963 10.0211  11
   0   3   3 109.553 9.13443  11
   0   3  -3 104.215 9.46107  10
   0  -3  -3 102.466 9.66316   9
   0   3   3 103.931 9.76687   9
   0   3  -3 107.268 9.51438   9
   0  -3   3 104.143 9.46226   9
   0   3   3 114.072 11.1357   7
   0  -3  -3 97.9986 10.9448   7
   0   3   4 1377.00 110.525   3
   0  -3  -4 1422.61 110.494   3
   0  -3  -4 1399.31 110.276   2
   0  -3  -4 1373.51 111.138   1
   0   3   4 1381.34 111.187   1
   0   3   4 1331.91 111.662  13
   0   3   4 1378.53 111.150  12
   0  -3  -4 1344.66 111.037  12
   0   3  -4 1328.62 111.212  12
   0   3   4 1421.20 111.921   6
   0  -3  -4 1387.68 112.126   5
   0   3   4 1387.31 111.881   5
   0   3  -4 1394.66 111.125   5
   0  -3   4 1489.22 110.995   5
   0  -3  -4 1344.87 111.759   6
   0  -3  -4 1340.76 109.844  11
   0   3   4 1431.31 109.917  11
   0   3  -4 1480.98 111.089  11
   0   3  -4 1314.13 110.374  10
   0  -3   4 1322.04 110.818  11
   0  -3   4 1421.05 110.543  10
   0  -3   4 1341.67 110.347   9
   0   3   4 1375.44 110.615   9
   0  -3  -4 1357.69 110.541   9
   0   3  -4 1338.10 110.354   9
   0  -3  -4 1348.50 111.960   7
   0   3   4 1408.94 111.737   7
   0   3   5 32.5356 4.90572   3
   0  -3  -5 36.9330 4.91120   3
   0   3   5 36.1245 4.28337   2
   0  -3  -5 34.6139 5.57663   1
   0  -3  -5 30.6251 4.39615   2
   0  -3  -5 43.4239 5.76671  12
   0   3   5 31.9374 5.61448  12
   0   3   5 42.1369 7.42424   5
   0  -3  -5 34.8947 6.31229   6
   0  -3  -5 44.4250 8.04924   5
   0   3   5 29.3667 6.59143   6
   0   3  -5 39.1978 6.34147   5
   0  -3   5 31.6420 5.73948   5
   0  -3   5 36.3684 4.66456  10
   0   3  -5 29.1172 4.36890  10
   0  -3   5 41.0724 5.36725  11
   0   3  -5 44.3510 5.67062  11
   0   3   5 41.4471 4.81674   9
   0  -3  -5 39.1511 4.62426   9
   0   3  -5 35.2472 4.39712   9
   0  -3   5 39.4784 4.46157   9
   0  -3  -5 35.7958 7.47912   7
   0   3   5 27.3931 6.24418   7
   0  -3  -6 140.540 12.7270   2
   0  -3  -6 136.919 13.1850   3
   0   3   6 127.759 12.3758   2
   0  -3  -6 132.037 13.8554   1
   0  -3   6 147.233 14.6526  13
   0   3   6 120.733 13.6867  12
   0  -3  -6 142.264 13.9389  12
   0   3  -6 143.296 13.3946  11
   0  -3   6 138.174 14.0049   5
   0   3   6 137.939 15.2471   5
   0  -3  -6 134.223 15.7980   5
   0  -3  -6 173.202 15.0205   6
   0   3  -6 115.724 14.3801   5
   0   3   6 142.545 14.9522   6
   0  -3   6 137.167 13.1929  11
   0  -3   6 142.202 12.6791  10
   0   3  -6 143.559 12.6183  10
   0  -3  -6 152.764 13.1639  10
   0  -3  -6 148.940 12.6903   9
   0   3   6 144.822 12.8108   9
   0   3  -6 142.888 12.3578   9
   0  -3   6 144.215 12.3786   9
   0  -3  -6 127.259 15.3530   7
   0  -3  -6 142.910 12.5570   8
   0   3   6 143.833 14.5629   7
   0   3  -6 152.433 14.4018   7
   0  -3  -7 115.003 11.1882   3
   0  -3  -7 115.519 10.7118   2
   0   3   7 113.001 10.4164   2
   0  -3  -7 112.731 12.0628   1
   0   3   7 108.475 11.9660  12
   0  -3   7 114.944 12.6675  13
   0   3  -7 124.997 11.3269  11
   0   3   7 107.863 12.8087   6
   0   3  -7 126.554 13.2729   5
   0  -3   7 110.366 12.1474   5
   0  -3  -7 104.282 13.8973   5
   0  -3   7 103.246 10.9506  11
   0   3  -7 108.616 10.2543  10
   0  -3  -7 99.0031 10.5550  10
   0  -3   7 116.585 10.3996  10
   0   3   7 103.646 10.3686   9
   0  -3  -7 118.503 10.3544   9
   0   3  -7 99.3970 9.85749   9
   0  -3   7 110.541 9.96025   9
   0   3  -7 135.059 12.9310   7
   0  -3  -7 106.759 13.5491   7
   0  -3  -7 110.655 10.2874   8
   0  -3  -8 571.831 48.2824   2
   0  -3  -8 572.800 49.6354   1
   0   3   8 518.597 47.8458   2
   0  -3   8 613.865 50.5354  13
   0   3   8 588.219 49.6270  12
   0   3  -8 571.851 48.5674  11
   0  -3  -8 597.097 51.9243   5
   0   3  -8 571.363 50.6864   5
   0   3   8 568.445 50.3008   6
   0   3  -8 604.313 47.8492  10
   0  -3  -8 585.799 48.2203  10
   0  -3   8 603.851 48.5185  11
   0  -3   8 594.620 47.8722  10
   0   3   8 568.261 47.8443   9
   0   3  -8 594.926 47.3509   9
   0  -3  -8 600.982 47.7896   9
   0  -3   8 586.166 47.3759   9
   0  -3  -8 531.168 50.7913   7
   0  -3  -8 606.421 47.8232   8
   0   3  -8 622.873 50.3708   7
   0  -3  -9 1244.53 98.0370   2
   0  -3  -9 1201.55 99.4506   1
   0   3   9 1103.54 97.4504   2
   0  -3   9 1272.55 100.341  13
   0   3   9 1168.43 99.2415  12
   0   3  -9 1218.34 98.1191  11
   0   3   9 1186.51 100.096   6
   0  -3  -9 1148.99 101.489   5
   0  -3   9 1244.29 96.2710   4
   0   3  -9 1175.73 100.641   5
   0  -3   9 1177.72 97.2622  10
   0  -3   9 1109.93 97.7735  11
   0  -3  -9 1195.40 97.6692  10
   0   3  -9 1204.10 97.2374  10
   0   3   9 1190.12 97.2498   9
   0  -3   9 1209.48 96.7070   9
   0   3  -9 1236.09 96.6709   9
   0  -3  -9 1270.06 97.1651   9
   0  -3  -9 1215.21 97.2576   8
   0  -3   9 1186.47 97.9258   8
   0  -3  -9 1180.68 101.116   7
   0   3  -9 1258.44 100.247   7
   0  -3 -10 0.45061 2.92295   4
   0  -3 -10 2.31652 3.03026   2
   0   3  10 5.24902 3.19144   2
   0  -3  10-1.13698 5.72283  13
   0   3  10 0.92414 5.06230  12
   0  -3 -10-3.04475 7.56019   5
   0   3  10-3.31427 5.98341   6
   0   3 -10 1.29294 6.75925   5
   0   3 -10 1.11704 3.44491  11
   0  -3  10 2.62737 2.70958  10
   0  -3 -10 4.75163 3.33953  10
   0  -3  10 1.05248 3.38528  11
   0   3 -10 1.12524 2.39545  10
   0   3  10 1.79345 2.40079   9
   0  -3 -10 1.27275 2.17768   9
   0  -3  10 4.25917 3.39714   8
   0  -3  10 2.77348 1.90503   9
   0   3 -10-1.12537 5.73845   7
   0  -3 -10 2.77281 7.15878   7
   0  -3 -10 0.37455 2.48785   8
   0  -3 -11 80.7727 9.23650   2
   0  -3 -11 84.9763 8.66361   4
   0  -3  11 88.1802 12.1051  13
   0   3  11 80.3496 10.6057  12
   0   3 -11 95.9888 9.50832  11
   0   3 -11 71.6629 8.19123  10
   0  -3 -11 74.8603 8.60173  10
   0  -3  11 77.0759 8.26765  10
   0  -3 -11 86.3501 13.3651   7
   0   3 -11 85.7858 12.2040   7
   0  -3  11 78.1384 7.30742   9
   0  -3 -11 87.7389 7.99743   9
   0  -3 -11 77.3971 8.28604   8
   0   3  11 81.6868 8.14271   9
   0   3  11 83.9843 12.0557   6
   0   3 -11 75.5218 12.6037   5
   0  -3 -12 5.72990 3.80599   2
   0  -3 -12 0.45728 2.81635   4
   0   3  12 2.22336 5.53140  12
   0  -3  12 2.76131 6.67705  13
   0   3 -12-1.62087 8.05593   5
   0   3  12 14.2314 7.17158   6
   0   3 -12 7.15267 2.77104  10
   0   3 -12 1.20546 3.56602  11
   0  -3  12 10.9197 3.18114  10
   0   3  12 6.46083 2.57947   9
   0  -3  12 2.23449 1.47192   9
   0  -3 -12 9.81909 3.17610   8
   0   3 -12 10.0160 7.20880   7
   0  -3 -12 6.80780 7.86701   7
   0  -3 -13 269.708 22.0100   4
   0  -3 -13 237.989 22.9792   2
   0  -3  13 210.618 25.6143  13
   0   3  13 269.355 25.1136  12
   0  -3  13 221.633 25.0860  12
   0   3 -13 248.828 22.4989  11
   0   3  13 244.337 25.7494   6
   0   3 -13 220.104 26.9217   5
   0   3 -13 257.198 21.7164  10
   0  -3  13 258.090 21.8381  10
   0   3  13 242.092 21.2702   9
   0  -3 -13 245.232 21.7511   8
   0   3 -13 274.963 27.2855   7
   0  -3 -13 233.190 27.1627   7
   0  -3 -14 5.42476 2.93756   4
   0  -3 -14 4.34862 4.02229   2
   0  -3  14 1.45664 5.94931  12
   0  -3  14-8.18373 7.79355  13
   0   3  14 2.61223 5.74576  12
   0   3 -14 5.08978 3.75172  11
   0   3 -14 1.96199 9.34102   5
   0   3  14-3.00449 7.15367   6
   0  -3  14 5.12996 3.14722  10
   0   3  14 2.32468 2.27922   9
   0  -3 -14 0.94687 2.87485   8
   0   3 -14 8.78365 8.36440   7
   0  -3 -14 6.19690 9.83421   7
   0  -3 -15 127.948 13.1165   2
   0   3 -15 108.188 11.4247  11
   0  -3  15 107.697 15.7752  13
   0   3  15 95.6309 13.7623  12
   0  -3  15 128.492 15.4902  12
   0   3 -15 89.8119 16.5935   5
   0   3  15 104.352 15.4885   6
   0  -3 -15 94.6886 10.4296   8
   0   3 -15 106.360 16.5071   7
   0  -3 -15 85.0958 16.3903   7
   0   3 -16 171.590 23.5189   5
   0   3  16 158.128 20.5981   6
   0   3 -16 171.885 16.5846  11
   0  -3 -16 152.258 23.3682   7
   0   3 -16 163.321 22.0656   7
   0   3  16 150.902 19.6066  12
   0  -3  16 201.500 21.4547  12
   0  -3  16 210.573 22.9573  13
   0   3  17 169.905 19.9617   6
   0   3 -17 140.192 22.0134   5
   0  -3  17 162.524 20.7562  13
   0   3  17 148.537 18.5469  12
   0  -3  17 152.470 19.3929  12
   0  -3 -17 124.032 22.0564   7
   0   3 -17 115.891 20.3231   7
   0   3 -18 137.717 22.9008   5
   0   3  18 155.655 20.8790   6
   0  -3  18 232.393 21.4450   6
   0   3  18 130.900 18.6880  12
   0  -3  18 156.588 20.2565  12
   0  -3  18 134.408 20.5115  13
   0   3  18 141.571 20.5992  13
   0   3 -18 141.226 22.4597   7
   0  -3 -18 141.255 23.2362   7
   0  -3 -18 117.827 18.7104   1
   0   3  19 1432.81 112.210   6
   0  -3 -19 1189.60 115.095   5
   0   3 -19 1229.54 114.358   5
   0   3  19 1119.70 110.851  13
   0  -3  19 1459.58 111.946  12
   0   3  19 1193.91 109.681  12
   0  -3  19 1350.04 112.752  13
   0   3 -19 1285.13 114.131   7
   0  -3 -19 1311.56 115.645   7
   0  -3 -19 1341.36 110.701   1
   0   3 -20 126.670 23.0918   5
   0   3  20 103.934 18.7204   6
   0  -3 -20 150.106 25.0847   5
   0  -3  20 102.930 18.6590  13
   0  -3  20 122.367 18.3513  12
   0   3  20 140.258 18.1872  12
   0   3  20 122.169 19.5561  13
   0   3 -20 110.523 21.4487   7
   0  -3 -20 107.512 22.3210   7
   0  -3 -20 110.911 17.3884   1
   0   3 -21 559.300 53.7724   5
   0   3  21 534.139 48.6753   6
   0  -3 -21 406.365 50.4647   5
   0   3  21 477.323 46.2413  12
   0   3  21 500.385 48.7719  13
   0  -3  21 394.828 46.2189  12
   0  -3  21 472.621 48.7195  13
   0  -3 -21 575.335 55.1979   7
   0   3 -21 486.043 51.0944   7
   0  -3 -21 419.549 45.8506   1
   0  -3 -22 22.4157 16.4225   5
   0   3 -22-6.98496 15.6147   5
   0  -3  22-2.39280 8.95097  12
   0  -3  22 5.49165 10.7494  13
   0   3  22 24.1978 12.9841  13
   0   3  22 6.56345 9.78186  12
   0  -3 -22-11.1235 15.4329   7
   0   3 -22-3.37120 13.4813   7
   0  -3 -22-8.86964 11.4478   1
   0  -3 -23 19.7670 17.8557   5
   0   3 -23 59.1361 18.7692   5
   0  -3  23 31.8800 13.6198  13
   0   3  23 25.4410 10.8120  12
   0   3  23 45.6389 15.1222  13
   0  -3  23 42.8156 13.5617  12
   0   3 -23 32.5321 16.3579   7
   0  -3 -23 19.8487 17.3324   7
   0  -3 -23 23.4375 11.7547   1
   0  -3 -24-16.6428 16.6393   5
   0   3 -24-3.91509 16.2964   5
   0  -3  24 13.2277 11.2227  12
   0  -3  24-3.05166 11.6854  13
   0   3  24-2.43983 9.34331  12
   0   3  24 18.0552 12.0351  13
   0   3 -24-11.5954 17.2817   7
   0  -3 -24 16.9535 15.0815   7
   0  -3 -24 9.88319 11.4106   1
   0   3 -25 78.3275 22.5378   5
   0  -3 -25 56.8381 21.2428   5
   0   3  25 79.7237 17.0429  12
   0  -3  25 102.509 19.1280  12
   0  -3  25 137.833 22.5657  13
   0   3  25 69.9864 19.1662  13
   0   3 -25 65.8719 20.9512   7
   0  -3 -25 88.8535 25.2085   7
   0  -3 -25 80.8798 17.6430   1
   0   3 -26 121.335 26.6803   5
   0  -3 -26 104.286 19.0347   1
   0   3  26 83.7478 18.2632  12
   0  -3  26 94.0931 20.9150  13
   0  -3  26 112.902 20.1849  12
   0  -3 -26 80.1562 27.2511   7
   0  -4   0 2543.46 201.523  11
   0  -4   0 2231.53 201.492  10
   0   4   0 2616.94 201.664  11
   0  -4   0 2120.06 203.195   7
   0   4   0 1900.19 205.004   7
   0  -4   0 2804.76 202.125   1
   0   4   0 2754.70 201.926   1
   0  -4   0 2551.00 201.777   6
   0   4   0 2730.05 201.943   6
   0  -4  -1 2916.75 226.861   1
   0   4   1 2945.46 226.747   1
   0   4  -1 2943.79 227.121   1
   0  -4   1 2853.85 227.225   1
   0   4   1 3229.22 227.830   7
   0   4  -1 2336.40 227.847   7
   0   4   1 2788.76 226.438   5
   0  -4  -1 3039.70 226.701   5
   0   4  -1 2801.32 226.657   6
   0  -4   1 2845.09 226.703   6
   0   4   1 2895.29 227.253   6
   0  -4  -1 2811.67 227.107   6
   0   4   1 2947.28 226.646  11
   0  -4  -1 2892.87 226.556  11
   0  -4   1 2781.30 226.740  10
   0   4   1 2720.06 226.733   9
   0   4  -1 2804.81 226.764   9
   0  -4   1 2879.69 226.724   9
   0   4   1 3293.75 225.918   3
   0  -4  -2 269.195 21.4090   3
   0   4   2 266.576 21.4445   3
   0   4   2 254.426 22.4488   1
   0  -4  -2 280.149 22.6899   1
   0   4  -2 245.018 22.9112   1
   0  -4  -2 273.713 22.6658  12
   0   4   2 260.173 22.5513  12
   0  -4  -2 306.765 24.4179  13
   0  -4   2 252.649 22.7235  12
   0  -4  -2 256.591 22.7770   5
   0   4  -2 252.020 22.2432   6
   0  -4   2 271.773 22.3702   6
   0   4   2 284.963 22.8898   5
   0  -4  -2 241.753 23.1117   6
   0  -4  -2 243.163 22.0415  11
   0  -4   2 270.633 22.5300  10
   0   4  -2 239.359 22.2049  10
   0   4   2 270.845 22.2440  11
   0   4  -2 254.940 22.4236   9
   0  -4  -2 253.420 22.4629   9
   0   4   2 277.071 22.7231   9
   0  -4   2 265.440 22.4403   9
   0  -4  -2 269.304 23.8519   7
   0   4   2 243.508 23.0769   7
   0  -4  -3 34.3762 3.95860   3
   0   4   3 30.5590 3.99227   3
   0   4  -3 30.6900 5.96082   1
   0  -4  -3 33.5824 5.41875   1
   0   4   3 43.5218 5.62431   1
   0  -4  -3 42.2157 6.67624  13
   0  -4  -3 31.8906 5.05297  12
   0   4   3 37.9764 5.40103  12
   0   4   3 44.8280 7.28347  13
   0  -4   3 45.0232 5.70798  12
   0   4  -3 36.2701 5.91546  12
   0   4  -3 33.9663 4.44761   5
   0  -4   3 32.2147 4.81025   6
   0  -4  -3 30.0123 6.02066   5
   0   4   3 42.3615 6.61766   5
   0   4  -3 43.8217 5.78774  11
   0  -4  -3 33.5229 4.34774  11
   0  -4   3 44.8404 5.58752  11
   0   4   3 32.7449 4.51628  11
   0  -4   3 35.1938 5.03296  10
   0  -4  -3 38.8674 5.33875   9
   0  -4   3 26.6912 4.71154   9
   0   4  -3 43.3291 5.04236  10
   0   4  -3 37.1567 4.99170   9
   0   4   3 41.5788 5.43877   9
   0   4   3 38.1520 6.75242   7
   0  -4  -3 36.0461 6.89113   7
   0   4   4 4386.72 345.569   3
   0  -4  -4 4274.59 345.389   3
   0  -4  -4 4306.45 346.437   1
   0   4   4 4485.80 346.533   1
   0   4   4 4486.22 347.482  13
   0  -4  -4 4180.15 346.830  13
   0  -4  -4 4312.97 346.334  12
   0   4   4 4301.68 346.487  12
   0  -4   4 3999.47 346.444  12
   0   4  -4 4376.88 346.616  12
   0   4   4 4331.35 347.274   6
   0   4  -4 4223.61 346.023   5
   0   4   4 4230.48 347.039   5
   0  -4  -4 4281.53 347.275   5
   0  -4   4 4553.99 346.042  10
   0   4   4 4507.67 345.395  11
   0   4  -4 4368.47 346.474  11
   0  -4  -4 4434.86 345.309  11
   0  -4   4 4398.28 346.321  11
   0   4  -4 4135.62 345.769  10
   0   4   4 4512.17 346.175   9
   0  -4  -4 4198.00 345.972   9
   0  -4   4 4447.97 345.837   9
   0   4  -4 4316.72 345.869   9
   0  -4  -4 4201.58 347.411   7
   0   4   4 4490.29 347.215   7
   0   4   5 3616.09 287.198   3
   0  -4  -5 3571.79 287.020   3
   0   4   5 3604.02 288.062   1
   0  -4  -5 3498.60 287.911   1
   0  -4  -5 3806.84 286.977   2
   0   4   5 3640.46 288.069  12
   0  -4  -5 3288.03 288.265  13
   0  -4  -5 3654.52 287.924  12
   0   4   5 3720.84 288.899  13
   0   4  -5 3801.11 287.971  11
   0   4  -5 3660.21 288.176  12
   0   4   5 3702.09 286.515  11
   0  -4  -5 3486.01 288.741   6
   0  -4  -5 3529.35 289.172   5
   0   4   5 3512.23 288.756   5
   0   4  -5 3553.14 287.887   5
   0   4   5 3577.21 288.920   6
   0  -4   5 3765.75 287.358  10
   0   4  -5 3467.17 287.068  10
   0  -4   5 3490.57 287.643  11
   0  -4   5 3552.03 287.035   9
   0  -4  -5 3535.05 287.309   9
   0   4  -5 3575.51 287.098   9
   0   4   5 3645.19 287.429   9
   0   4   5 3621.93 288.693   7
   0  -4  -5 3510.66 289.132   7
   0   4   6 97.2795 10.0677   3
   0  -4  -6 90.6709 9.78563   3
   0  -4  -6 113.255 9.70201   2
   0  -4  -6 89.9424 10.7902   1
   0   4   6 79.7616 11.6785  13
   0   4   6 99.4268 10.8812  12
   0   4   6 102.922 8.68117  11
   0   4   6 107.929 8.72938  11
   0   4   6 91.3612 11.8811   6
   0  -4   6 96.8969 10.7130   5
   0   4  -6 89.0140 11.1791   5
   0  -4  -6 85.5014 12.2971   5
   0   4  -6 101.822 9.69278  10
   0   4  -6 80.9004 10.2886  11
   0  -4   6 105.837 9.89460  10
   0  -4   6 106.940 10.5300  11
   0   4   6 105.364 10.1097   9
   0   4  -6 90.4573 9.41566   9
   0  -4  -6 102.227 9.88020   9
   0  -4   6 105.336 9.63612   9
   0  -4  -6 97.0998 12.5785   7
   0   4   6 88.8876 11.5189   7
   0  -4  -7 249.809 20.6139   3
   0  -4  -7 249.071 20.1256   2
   0   4   7 236.032 19.7811   2
   0  -4  -7 209.012 21.1060   1
   0   4   7 209.193 22.0218  13
   0   4   7 243.533 21.5681  12
   0   4  -7 212.344 20.7772  11
   0   4   7 227.627 22.4441   6
   0  -4  -7 225.258 23.4174   5
   0  -4   7 227.410 21.2483   5
   0   4  -7 227.029 22.0016   5
   0  -4  -7 251.564 20.6813  10
   0  -4   7 231.388 20.6757  11
   0  -4   7 234.277 20.1084  10
   0   4  -7 217.802 19.8705  10
   0   4  -7 229.690 19.7216   9
   0  -4  -7 227.377 20.0485   9
   0  -4   7 221.307 19.6903   9
   0   4   7 215.461 20.1385   9
   0   4  -7 247.338 21.8404   7
   0  -4  -7 246.771 19.9811   8
   0  -4  -7 195.868 22.4912   7
   0  -4  -8 236.133 21.4445   3
   0  -4  -8 247.448 21.0265   2
   0  -4  -8 221.581 22.2147   1
   0   4   8 210.804 20.4201   2
   0  -4   8 245.691 23.3727  13
   0   4   8 267.349 22.7792  12
   0   4  -8 245.033 21.8385  11
   0   4  -8 226.533 23.2014   5
   0  -4  -8 243.070 24.6475   5
   0   4   8 241.765 23.5224   6
   0   4  -8 210.983 20.4995  10
   0  -4   8 241.300 20.8434  10
   0  -4  -8 249.181 21.3435  10
   0   4  -8 227.395 20.3210   9
   0   4   8 248.176 21.0170   9
   0  -4  -8 265.698 20.9398   9
   0  -4  -8 223.787 24.1923   7
   0   4  -8 296.705 23.5784   7
   0  -4  -8 244.300 20.6544   8
   0  -4  -9 187.354 16.3958   2
   0   4   9 172.714 15.6880   2
   0  -4  -9 188.079 17.9610   1
   0  -4   9 166.813 18.3969  13
   0   4   9 185.207 17.9257  12
   0   4  -9 192.628 17.0298  11
   0   4  -9 157.345 18.8698   5
   0  -4  -9 163.138 20.1029   5
   0   4   9 165.010 18.7937   6
   0  -4  -9 176.926 16.3863  10
   0  -4   9 178.109 15.9339  10
   0   4  -9 172.880 15.7247  10
   0   4  -9 174.732 15.3034   9
   0  -4   9 185.648 15.4297   9
   0  -4  -9 169.824 15.7274   9
   0   4   9 168.831 15.9774   9
   0   4  -9 157.533 18.2248   7
   0  -4  -9 160.403 19.4416   7
   0  -4  -9 176.090 15.7517   8
   0  -4 -10-0.56540 3.19752   2
   0  -4  10-2.35111 5.91520  13
   0   4  10-1.89998 4.96529  12
   0  -4 -10-3.12979 7.11212   5
   0  -4  10 0.35719 1.59704   4
   0   4  10-5.90254 6.24493   6
   0   4 -10 1.26430 6.52702   5
   0  -4 -10 5.81055 4.93666   1
   0   4  10 2.69617 2.79352   2
   0   4 -10-1.97497 4.29898  11
   0  -4  10 2.15350 2.72328  10
   0   4 -10-0.41837 2.57832  10
   0  -4  10 0.29864 2.01023   9
   0  -4 -10 0.81987 2.31835   9
   0   4  10 0.45474 2.82692   9
   0   4 -10 0.28794 2.00823   9
   0  -4 -10 1.46078 7.15435   7
   0   4 -10-1.12323 5.26696   7
   0  -4 -10-0.41838 2.55569   8
   0  -4 -11 47.6595 6.37370   2
   0  -4 -11 35.5030 5.92088   4
   0   4  11 51.0191 8.33433  12
   0  -4  11 29.7941 8.06320  13
   0  -4  11 40.6285 3.98133   4
   0   4 -11 37.0202 9.48302   5
   0  -4 -11 51.8489 11.1208   5
   0   4  11 45.7797 9.42789   6
   0  -4 -11 49.0295 8.41339   1
   0  -4  11 42.9574 5.56841  10
   0   4 -11 47.8690 6.85541  11
   0   4 -11 38.0692 5.27592  10
   0  -4 -11 37.7944 5.01948   9
   0  -4  11 47.4615 4.91009   9
   0   4  11 35.3153 5.36005   9
   0   4 -11 36.4696 4.59903   9
   0  -4 -11 51.0776 10.9805   7
   0  -4 -11 38.8765 5.41714   8
   0   4 -11 23.9232 8.13725   7
   0  -4 -12 83.0793 8.93702   4
   0  -4 -12 71.7807 8.99680   2
   0  -4 -12 77.0416 10.9848   1
   0  -4  12 49.5375 10.8271  13
   0   4  12 79.3718 10.9652  12
   0   4 -12 92.0649 14.0223   5
   0   4  12 84.7297 12.1610   6
   0  -4 -12 73.7559 14.0287   5
   0   4 -12 61.4361 8.79452  11
   0  -4  12 88.7347 8.49286  10
   0   4 -12 76.6924 8.21882  10
   0   4  12 75.3059 8.30849   9
   0  -4 -12 79.7752 8.28695   8
   0  -4  12 73.3835 7.33034   9
   0  -4 -12 83.1607 8.03860   9
   0  -4 -12 96.8126 14.2231   7
   0   4 -12 77.1078 12.1304   7
   0  -4 -13 291.495 25.5391   2
   0  -4 -13 291.803 24.7580   4
   0  -4 -13 304.160 28.0311   1
   0   4  13 271.535 27.2505  12
   0  -4  13 234.896 27.8800  13
   0   4 -13 337.031 25.9038  11
   0   4 -13 277.448 29.6744   5
   0   4  13 285.799 28.6533   6
   0  -4 -13 235.342 30.2469   5
   0  -4  13 277.335 24.1846  10
   0   4 -13 260.205 24.0673  10
   0  -4 -13 260.948 23.6888   9
   0   4  13 279.745 24.1828   9
   0  -4 -13 276.483 24.2510   8
   0  -4 -13 273.858 29.9166   7
   0   4 -13 315.250 29.3890   7
   0  -4 -14 17.7698 4.51234   4
   0  -4 -14 16.5501 5.21986   2
   0  -4 -14 21.8887 8.08799   1
   0   4  14 19.8798 7.06249  12
   0  -4  14 26.7532 8.48475  13
   0  -4 -14 26.9080 11.1208   5
   0   4 -14 17.3543 9.98420   5
   0   4  14 29.8145 9.65923   6
   0   4 -14 26.7688 5.70416  11
   0  -4  14 29.8549 4.62815  10
   0  -4 -14 26.5773 4.39519   8
   0   4  14 16.8593 4.08724   9
   0  -4 -14 8.54185 10.0148   7
   0   4 -14 26.0740 9.25250   7
   0  -4 -15-1.80600 4.17520   2
   0  -4 -15 5.07691 3.71862   4
   0  -4  15-1.80902 7.53255  13
   0   4  15 4.27314 6.15609  12
   0  -4  15-1.62127 7.00607  12
   0   4 -15 8.32299 4.45894  11
   0  -4 -15 13.2258 7.49420   1
   0   4 -15-2.10444 8.92848   5
   0  -4 -15 4.83776 10.2618   5
   0   4  15 6.67444 7.94488   6
   0  -4 -15 1.03192 3.01545   8
   0  -4 -15-2.31492 9.63749   7
   0   4 -15 5.73098 8.54357   7
   0  -4 -16 75.4449 12.6193   1
   0   4 -16 73.6516 9.71514  11
   0  -4  16 78.0510 13.5428  12
   0  -4  16 73.7413 14.0414  13
   0   4  16 96.1127 13.9342  12
   0   4 -16 57.1168 14.9470   5
   0   4  16 72.9800 13.7467   6
   0  -4 -16 84.7591 10.6543   2
   0  -4 -16 82.4241 16.9849   7
   0   4 -16 104.639 16.3311   7
   0   4  17-3.79013 9.53560   6
   0   4 -17 7.40551 10.2743   5
   0   4  17-1.62928 7.63987  12
   0  -4  17 2.07389 8.29325  13
   0  -4  17 7.39493 7.84131  12
   0   4 -17-2.28576 9.51371   7
   0  -4 -17-2.68346 11.1690   7
   0  -4 -17-1.67542 7.36471   1
   0   4  18 112.221 17.7098   6
   0   4 -18 159.867 21.9286   5
   0  -4  18 125.965 18.8045  13
   0  -4  18 86.4630 16.7821  12
   0   4  18 124.976 16.8008  12
   0  -4 -18 119.605 21.7891   7
   0   4 -18 126.864 20.3312   7
   0  -4 -18 99.6918 16.1524   1
   0   4  19 69.7820 14.7959   6
   0   4 -19 71.4206 18.0240   5
   0   4  19 75.6571 13.4521  12
   0  -4  19 60.4034 13.9994  12
   0  -4  19 63.6815 14.9652  13
   0  -4 -19 68.4630 18.2890   7
   0   4 -19 80.9203 17.2581   7
   0  -4 -19 75.5143 14.1358   1
   0   4  20-2.23696 10.6483   6
   0   4 -20 3.05401 12.2137   5
   0  -4  20-4.99907 11.7217  13
   0   4  20 7.82518 7.82467  12
   0  -4  20-4.40227 8.98504  12
   0   4 -20 2.86921 12.3940   7
   0  -4 -20 23.5266 14.7747   7
   0  -4 -20 5.98216 9.35172   1
   0   4  21 70.4286 15.2279   6
   0   4 -21 71.5523 19.0933   5
   0  -4  21 69.6161 14.9528  12
   0   4  21 59.3973 15.4773  13
   0  -4  21 47.5815 14.8928  13
   0   4  21 91.1942 14.7653  12
   0  -4 -21 24.9291 17.7078   7
   0   4 -21 49.4584 17.3209   7
   0  -4 -21 82.1906 14.6847   1
   0   4  22 85.9372 17.2549   6
   0   4 -22 93.3085 20.1629   5
   0   4  22 68.2429 15.7479  13
   0   4  22 65.7937 14.2844  12
   0  -4  22 75.6776 16.0890  12
   0  -4  22 41.8239 15.3936  13
   0  -4 -22 87.9431 21.7411   7
   0   4 -22 59.8036 17.6471   7
   0  -4 -22 33.3748 12.6420   1
   0   4 -23 29.3578 16.4520   5
   0  -4  23 11.7468 13.4021  13
   0   4  23 17.3445 11.8608  13
   0   4  23 37.0034 12.0014  12
   0  -4  23 17.9474 12.0840  12
   0  -4 -23-4.03030 15.4785   7
   0   4 -23 10.6837 16.7434   7
   0  -4 -23 4.67737 9.62237   1
   0  -4 -24 442.653 53.1180   5
   0   4 -24 499.960 54.0859   5
   0  -4  24 443.206 47.3392  12
   0   4  24 457.165 49.2601  13
   0  -4  24 493.547 50.1752  13
   0   4  24 453.829 46.6320  12
   0   4 -24 460.908 52.7520   7
   0  -4 -24 425.747 54.0418   7
   0  -4 -24 426.476 45.9991   1
   0  -4 -25 53.1070 20.2575   5
   0   4 -25 28.5915 19.3039   5
   0   4  25 66.7288 15.1541  12
   0  -4  25 42.1351 13.7778  12
   0  -4  25 6.46866 13.4190  13
   0   4  25 16.0993 14.3577  13
   0  -4 -25 40.5467 21.2625   7
   0   4 -25 4.05951 18.0068   7
   0  -4 -25 38.7980 13.0672   1
   0  -4 -26-2.72378 10.6741   1
   0   4 -26 4.29430 16.8180   5
   0  -4  26-16.9209 16.1149  13
   0   4  26-5.39627 12.0730  12
   0   5   0 0.99811 3.97055   6
   0  -5   0-1.92160 4.07525   6
   0   5   0 0.67348 2.41729   5
   0  -5   0 2.14106 4.25863   1
   0   5   0 0.47431 3.69338   1
   0  -5   0-1.65271 3.84546  11
   0   5   0 0.88956 3.44437  11
   0  -5   0 1.39490 3.66019  10
   0  -5   0-0.94574 7.20053   7
   0   5   0-6.80189 14.9497   7
   0   5   1 3215.73 232.237   7
   0  -5   1 2622.37 231.840   7
   0   5  -1 2245.45 232.474   7
   0  -5  -1 2766.21 230.981   6
   0   5  -1 2935.03 230.658   6
   0  -5   1 2813.16 230.604   6
   0   5   1 2861.81 230.145   5
   0   5   1 2948.39 231.239   6
   0  -5  -1 3190.69 230.656   5
   0   5   1 2889.92 230.633   1
   0  -5  -1 3115.77 230.997   1
   0  -5   1 2873.25 231.345   1
   0   5  -1 3022.26 231.031   1
   0  -5  -1 2911.43 230.402  11
   0  -5   1 2790.48 230.681  10
   0   5  -1 2934.14 230.843  11
   0   5   1 2994.46 230.603  11
   0   5   1 2560.27 230.567   9
   0   5  -1 2776.92 230.733   9
   0  -5   1 2753.81 230.499   9
   0   5   1 3618.28 229.864   3
   0   5   2 1861.34 151.729   3
   0  -5  -2 1937.01 153.222   1
   0   5  -2 1858.13 153.441   1
   0  -5   2 1798.33 153.726   1
   0   5   2 1868.75 152.885   1
   0  -5  -2 2199.56 153.653  12
   0  -5  -2 2569.81 157.039  13
   0  -5  -2 1795.40 153.616   6
   0  -5   2 1917.62 152.879   6
   0   5   2 1920.59 153.026   5
   0   5  -2 1839.50 152.774   6
   0   5   2 1903.62 153.872   6
   0  -5  -2 1929.40 153.256   5
   0   5   2 1932.56 152.782  11
   0  -5  -2 1820.77 152.551  11
   0  -5   2 1971.74 153.126  10
   0   5   2 1878.70 153.198   9
   0  -5   2 1969.22 152.977   9
   0   5  -2 1928.82 153.060   9
   0  -5  -2 1880.90 153.008   9
   0   5  -2 1751.87 154.576   7
   0  -5  -2 1943.14 154.938   7
   0   5   2 1876.44 153.600   7
   0  -5  -3 1396.63 108.572   3
   0   5   3 1401.73 108.696   3
   0   5  -3 1267.38 110.403   1
   0  -5  -3 1442.05 110.084   1
   0   5   3 1347.07 109.818   1
   0  -5  -3 1414.15 109.991  12
   0   5   3 635.127 109.642  13
   0   5   3 1341.92 109.830  12
   0  -5  -3 1632.95 111.669  13
   0  -5   3 1468.63 110.282  12
   0   5   3 1370.14 110.238   5
   0  -5   3 1407.57 109.547   6
   0   5  -3 1396.73 108.882   5
   0  -5  -3 1345.20 110.401   5
   0  -5   3 1427.48 109.866  10
   0   5   3 1468.95 109.421  11
   0  -5   3 1336.79 109.920  11
   0   5  -3 1276.45 109.443  10
   0  -5  -3 1369.16 109.206  11
   0   5  -3 1456.94 109.839   9
   0  -5  -3 1328.35 109.738   9
   0   5   3 1363.84 109.918   9
   0  -5   3 1385.87 109.645   9
   0   5   3 1349.69 110.585   7
   0  -5  -3 1426.08 111.287   7
   0   5   4 57.1286 5.92912   3
   0  -5  -4 56.5939 5.69346   3
   0  -5  -4 51.2574 7.12224   1
   0   5  -4 45.3752 8.47513   1
   0   5   4 68.2798 7.72183   1
   0   5   4 65.0845 9.15896  13
   0  -5  -4 63.7369 8.51900  13
   0   5   4 68.8493 7.53841  12
   0  -5  -4 51.4926 7.08978  12
   0   5  -4 51.5674 7.59686  12
   0  -5   4 49.9378 7.38773  12
   0   5  -4 54.0007 6.35642   5
   0  -5   4 53.3288 6.51279   6
   0   5   4 43.1598 7.96195   5
   0  -5  -4 59.2641 8.59286   5
   0  -5   4 60.7537 7.26102  11
   0  -5   4 59.5539 6.97073  10
   0   5   4 56.3139 6.21253  11
   0   5  -4 65.3325 7.80906  11
   0  -5  -4 52.4429 6.09186  11
   0   5   4 67.1301 7.45238   9
   0   5  -4 43.3352 6.39468  10
   0  -5  -4 57.3599 6.83453   9
   0  -5   4 63.7729 6.82626   9
   0   5  -4 54.4898 6.81055   9
   0  -5  -4 40.3210 8.79607   7
   0   5   4 58.0724 8.62710   7
   0   5   5 824.866 66.2454   3
   0  -5  -5 791.156 65.9719   3
   0  -5  -5 801.928 67.3085   1
   0  -5  -5 872.642 66.2542   2
   0   5   5 812.595 67.3893  12
   0   5   5 832.167 68.6955  13
   0   5   5 874.733 66.0860  11
   0   5  -5 866.037 67.5195  11
   0  -5   5 838.928 67.6690  12
   0   5  -5 798.356 66.9745   5
   0   5   5 808.613 68.4564   6
   0  -5   5 837.706 66.6102   6
   0  -5  -5 783.880 68.4000   5
   0   5   5 801.275 68.0924   5
   0  -5  -5 772.260 65.8383  11
   0  -5   5 768.458 67.0382  11
   0  -5   5 824.778 66.8530  10
   0   5  -5 786.369 66.4833  10
   0  -5  -5 827.913 66.8086   9
   0   5   5 799.114 66.9471   9
   0   5  -5 788.907 66.5893   9
   0  -5   5 831.244 66.5850   9
   0  -5  -5 799.848 68.7026   7
   0   5   5 848.234 68.2969   7
   0   5   6 225.807 20.2057   3
   0  -5  -6 226.930 19.9619   3
   0  -5  -6 236.285 19.9892   2
   0  -5  -6 221.150 21.2196   1
   0   5   6 237.005 22.6778  13
   0   5   6 232.626 21.4581  12
   0   5  -6 218.303 21.0731  11
   0  -5   6 229.172 21.6936  12
   0   5   6 237.215 19.4739  11
   0   5   6 242.243 19.5168  11
   0   5  -6 231.840 21.3133   5
   0  -5  -6 215.429 22.5993   5
   0   5   6 220.424 22.4661   6
   0   5  -6 229.658 20.2202  10
   0  -5   6 237.923 20.5750  10
   0   5  -6 245.094 20.4000   9
   0  -5   6 232.546 20.2395   9
   0   5   6 229.284 20.7254   9
   0  -5  -6 224.175 20.4252   9
   0  -5  -6 202.437 22.5648   7
   0   5   6 215.110 22.1383   7
   0   5   7 606.887 51.2399   3
   0  -5  -7 604.408 50.9748   3
   0  -5  -7 592.024 52.0633   1
   0  -5  -7 651.048 50.8794   2
   0   5   7 657.855 53.7915  13
   0   5   7 615.963 52.2808  12
   0   5  -7 623.463 52.0306  11
   0   5   7 624.440 49.9155  11
   0   5   7 623.332 49.9446  11
   0   5   7 643.771 53.6243   6
   0   5  -7 630.656 52.5614   5
   0  -5  -7 590.282 53.8613   5
   0  -5   7 646.267 51.2452  10
   0   5  -7 599.310 50.8477  10
   0   5   7 627.046 51.3725   9
   0  -5  -7 601.943 51.1146   9
   0  -5   7 612.391 50.7803   9
   0   5  -7 606.162 50.8260   9
   0  -5  -7 564.152 53.5757   7
   0  -5  -8 3340.23 276.225   2
   0  -5  -8 3411.85 276.554   3
   0  -5  -8 3433.27 277.659   1
   0   5   8 3436.72 278.964  13
   0   5   8 3380.49 277.723  12
   0   5   8 3551.85 274.928  11
   0   5   8 3586.27 274.891  11
   0   5  -8 3531.08 277.408  11
   0   5  -8 3399.21 278.271   5
   0  -5  -8 3283.12 279.719   5
   0   5   8 3601.67 279.242   6
   0   5  -8 3239.79 276.078  10
   0  -5   8 3464.73 276.423  10
   0   5  -8 3334.15 275.994   9
   0  -5   8 3329.26 275.937   9
   0   5   8 3378.86 276.551   9
   0  -5  -8 3517.45 276.434   9
   0  -5  -8 3340.11 279.555   7
   0  -5  -8 3477.41 276.132   8
   0   5  -8 3728.98 278.331   7
   0  -5  -9 645.990 52.5304   2
   0  -5  -9 647.711 54.3577   1
   0   5   9 636.261 55.5649  13
   0   5   9 637.783 54.2225  12
   0  -5   9 662.150 55.4115  13
   0   5  -9 683.904 53.7281  11
   0   5  -9 647.545 55.0918   5
   0  -5  -9 615.560 56.6278   5
   0   5   9 574.940 55.0523   6
   0   5  -9 595.502 52.1644  10
   0  -5   9 653.775 52.5100  10
   0  -5  -9 670.822 52.5967   9
   0  -5   9 619.727 51.9913   9
   0   5  -9 620.286 51.9719   9
   0   5   9 650.644 52.7337   9
   0  -5  -9 550.660 55.6857   7
   0  -5  -9 621.798 52.2095   8
   0   5  -9 677.442 54.9449   7
   0  -5 -10 2136.36 161.156   2
   0   5  10 1920.39 160.432   2
   0  -5 -10 1897.73 162.688   1
   0   5  10 1942.63 162.667  12
   0   5  10 1884.83 163.786  13
   0  -5  10 2159.88 164.242  13
   0   5 -10 2085.27 161.979  11
   0  -5 -10 1960.10 165.371   5
   0   5  10 1952.98 163.929   6
   0   5 -10 1886.19 163.663   5
   0   5 -10 1972.98 160.569  10
   0  -5  10 2045.54 160.783  10
   0   5  10 2054.67 161.015   9
   0  -5 -10 2078.94 160.785   9
   0   5 -10 1949.40 160.133   9
   0  -5  10 1937.94 160.173   9
   0  -5 -10 1873.73 164.885   7
   0  -5 -10 2091.53 160.665   8
   0   5 -10 2071.82 163.547   7
   0  -5 -11 301.081 26.9185   2
   0  -5 -11 284.561 28.6311   1
   0  -5  11 310.123 30.1356  13
   0   5  11 267.295 28.3741  12
   0   5 -11 326.058 27.8713  11
   0   5 -11 316.389 30.4588   5
   0   5  11 333.030 30.5010   6
   0  -5 -11 249.582 30.9920   5
   0   5 -11 292.237 26.3131  10
   0  -5  11 326.991 26.6385  10
   0   5 -11 300.189 25.7936   9
   0  -5 -11 299.681 26.3578   9
   0  -5  11 292.669 25.8044   9
   0   5  11 318.677 26.7833   9
   0  -5 -11 304.164 31.5721   7
   0   5 -11 335.881 30.1053   7
   0  -5 -11 329.029 26.5232   8
   0  -5 -12 606.866 51.7321   2
   0  -5 -12 687.279 52.3631   4
   0  -5 -12 649.952 54.1961   1
   0  -5  12 572.742 54.7865  13
   0   5  12 562.024 53.4345  12
   0   5 -12 606.625 52.2839  11
   0   5 -12 638.286 55.7326   5
   0  -5 -12 597.472 57.0062   5
   0  -5  12 593.483 49.5794   4
   0   5  12 640.312 55.3165   6
   0   5 -12 600.739 50.9338  10
   0  -5  12 619.902 51.0833  10
   0  -5 -12 602.835 50.8836   9
   0   5  12 600.567 51.1859   9
   0  -5  12 633.021 50.3689   9
   0   5 -12 622.981 50.3309   9
   0  -5 -12 652.094 51.1979   8
   0  -5 -12 595.874 56.6023   7
   0   5 -12 656.969 55.1641   7
   0  -5 -13-1.42870 4.62825   4
   0  -5 -13 5.89853 4.12610   2
   0  -5 -13 10.3108 6.57005   1
   0  -5  13-7.91133 8.06577  13
   0   5  13 5.03538 5.99165  12
   0  -5 -13-2.10696 9.72892   5
   0   5 -13 1.72448 8.32772   5
   0   5  13-1.54085 7.00287   6
   0   5 -13-1.66563 4.45778  11
   0  -5  13-2.60513 3.18269  10
   0   5  13 0.55904 3.22676   9
   0   5 -13 6.17900 7.02058   7
   0  -5 -13-2.02597 9.35493   7
   0  -5 -13-0.53490 3.32528   8
   0  -5 -14 541.431 49.2723   2
   0  -5 -14 566.492 49.0083   4
   0  -5 -14 589.383 52.2449   1
   0   5  14 595.813 51.9416  12
   0  -5  14 579.418 53.5122  13
   0   5 -14 549.599 49.5099  11
   0  -5 -14 605.595 56.5325   5
   0   5  14 569.458 53.0104   6
   0   5 -14 591.635 54.2589   5
   0  -5  14 572.437 48.2738  10
   0   5  14 598.107 48.4792   9
   0  -5 -14 630.699 48.6083   8
   0   5 -14 610.376 53.6900   7
   0  -5 -14 489.742 54.4341   7
   0  -5 -15 195.449 22.0581   1
   0   5 -15 200.292 19.5984  11
   0  -5  15 223.475 24.1873  13
   0   5  15 203.486 21.9987  12
   0   5  15 207.767 23.5072   6
   0  -5 -15 147.735 24.6047   5
   0   5 -15 205.128 24.8883   5
   0  -5 -15 200.840 18.7587   4
   0  -5 -15 181.957 19.1675   2
   0   5 -15 181.638 23.0316   7
   0  -5 -15 222.288 26.4315   7
   0  -5 -16 81.6448 13.0680   1
   0   5 -16 79.9342 10.2693  11
   0   5  16 90.0966 12.9426  12
   0  -5  16 67.2974 13.7506  13
   0   5 -16 81.0656 15.3353   5
   0  -5 -16 66.2629 16.8886   5
   0   5  16 64.6423 13.4235   6
   0  -5 -16 56.3219 9.36191   2
   0  -5 -16 79.9064 17.3926   7
   0   5 -16 70.3671 13.8665   7
   0  -5 -17 470.304 45.5451   1
   0   5 -17 465.055 42.1449  11
   0   5  17 539.790 46.2530  12
   0  -5  17 555.800 48.6154  13
   0   5 -17 506.633 49.2282   5
   0  -5 -17 439.399 49.5578   5
   0   5  17 482.407 46.9147   6
   0  -5 -17 488.370 42.8763   2
   0  -5 -17 415.394 49.1014   7
   0   5 -17 485.521 48.2742   7
   0  -5 -18 476.095 52.3846   5
   0   5  18 496.335 48.9185   6
   0   5 -18 526.112 51.5939   5
   0  -5  18 401.462 47.4755  12
   0   5  18 552.719 47.9623  12
   0  -5  18 548.836 50.4713  13
   0   5 -18 510.941 50.9646   7
   0  -5 -18 512.717 52.6728   7
   0  -5 -18 525.894 47.8800   1
   0  -5 -19 9.67163 12.8933   5
   0   5 -19 2.82261 12.8295   5
   0   5  19 8.75660 9.95101   6
   0   5  19-5.59654 7.61613  12
   0  -5  19-7.18924 10.8928  13
   0  -5  19-4.28357 9.57754  12
   0  -5 -19-3.21086 11.7226   7
   0   5 -19-5.32571 12.8606   7
   0  -5 -19-1.90660 8.08895   1
   0   5 -20 214.319 29.9856   5
   0  -5 -20 174.927 30.7022   5
   0   5  20 239.265 27.7785   6
   0   5  20 207.518 25.3647  12
   0  -5  20 226.007 26.9119  12
   0  -5  20 250.961 29.0577  13
   0   5 -20 201.414 28.7594   7
   0  -5 -20 228.609 31.9562   7
   0  -5 -20 201.328 25.1458   1
   0  -5 -21-3.63078 15.1349   5
   0   5  21 7.27711 10.5105   6
   0   5 -21 22.5230 12.6234   5
   0  -5  21-5.34892 11.3743  13
   0   5  21 10.4513 9.68784  12
   0  -5  21 11.8944 10.3089  12
   0  -5 -21 18.0771 15.0711   7
   0   5 -21 24.8077 15.2102   7
   0  -5 -21 19.1060 10.1386   1
   0   5  22 43.1321 14.6065   6
   0   5 -22 58.1168 18.7321   5
   0   5  22 57.3905 13.2334  12
   0  -5  22 34.9603 12.7071  12
   0  -5  22 84.4707 16.5798  13
   0  -5 -22 89.2516 21.8536   7
   0   5 -22 49.9840 17.8714   7
   0  -5 -22 29.0651 13.2634   1
   0   5 -23 36.2055 16.4864   5
   0  -5  23 17.7553 13.7024  13
   0  -5  23 20.9360 10.9403  12
   0   5  23 18.5755 10.9358  12
   0   5 -23 17.8551 15.7305   7
   0  -5 -23-4.08712 16.0325   7
   0  -5 -23-2.34312 11.0347   1
   0   5 -24 76.7290 21.4233   5
   0   5  24 51.3699 14.5211  12
   0   5  24 37.2092 16.8437  13
   0  -5  24 82.0730 17.5135  12
   0  -5  24 102.359 19.4946  13
   0  -5 -24 78.4720 21.9850   7
   0   5 -24 67.5874 20.7702   7
   0  -5 -24 61.5717 15.1505   1
   0   5 -25 32.3594 18.9991   5
   0   5  25 19.5569 13.3487  13
   0   5  25 2.56540 10.3178  12
   0  -5  25 17.1323 14.0280  12
   0  -5  25 29.2241 14.3160  13
   0  -5 -25 22.8378 20.4508   7
   0   5 -25-4.00457 15.3717   7
   0  -5 -25 15.4585 12.8398   1
   0   5 -26 12.7583 15.5264   5
   0  -5 -26-2.70480 11.8920   1
   0   6   0 1571.61 126.962  11
   0  -6   0 1496.87 126.654  11
   0  -6   0 1524.10 127.041  10
   0  -6   0 1766.47 127.779   1
   0   6   0 1658.92 127.178   1
   0  -6   0 1487.77 126.996   6
   0   6   0 1570.59 125.738   5
   0   6   0 1703.90 127.490   6
   0  -6   0 1365.15 128.747   7
   0  -6  -1 295.221 46.4738   7
   0   6  -1 391.660 46.8793   7
   0   6   1 611.798 45.9298   7
   0  -6   1 416.013 44.6822   7
   0  -6   1 498.430 43.3234   6
   0   6  -1 502.642 43.4276   6
   0   6   1 505.474 43.9664   6
   0  -6  -1 480.245 43.7081   6
   0   6   1 503.293 42.6449   5
   0   6   1 518.966 43.4248   1
   0  -6  -1 541.114 43.8784   1
   0  -6   1 547.655 44.3708   1
   0   6  -1 500.377 43.6353   1
   0  -6   1 489.972 43.3092  11
   0  -6   1 531.821 43.6100  10
   0  -6  -1 503.962 43.0623  11
   0   6  -1 535.249 43.6891  11
   0   6   1 528.904 43.3807  11
   0  -6   1 495.185 43.2552   9
   0   6  -1 530.656 43.6202   9
   0   6   1 681.584 42.6188   3
   0   6   2 702.485 57.7272   3
   0  -6  -2 738.386 59.6153   1
   0   6  -2 755.352 59.8994   1
   0  -6   2 713.391 60.2385   1
   0   6   2 725.118 59.2213   1
   0  -6  -2 967.681 60.9601  12
   0  -6  -2 942.101 65.6860  13
   0  -6   2 729.695 59.2259   6
   0   6   2 728.655 60.3087   6
   0  -6  -2 757.765 59.5767   5
   0   6   2 687.054 59.0047   5
   0   6  -2 669.518 59.0260   6
   0  -6  -2 716.453 60.0427   6
   0   6   2 717.826 59.1024  11
   0  -6  -2 702.154 58.8379  11
   0  -6   2 735.780 59.4315  10
   0  -6   2 723.043 59.2039   9
   0   6  -2 774.970 59.5406   9
   0  -6  -2 728.712 59.3267   9
   0   6   2 745.834 59.6208   9
   0   6  -2 591.970 61.2249   7
   0   6   2 712.130 59.9308   7
   0  -6  -2 413.264 60.7455   7
   0  -6  -3 904.579 71.2442   3
   0   6   3 888.856 71.3094   3
   0   6   3 850.482 72.6645   1
   0  -6  -3 945.989 73.1186   1
   0  -6   3 862.929 73.8373   1
   0  -6  -3 963.083 73.2645  12
   0   6   3 874.904 72.7801  12
   0  -6   3 957.717 73.3115  12
   0   6  -3 836.904 72.3536   6
   0  -6   3 883.019 72.4558   6
   0   6  -3 925.253 71.4462   5
   0  -6  -3 872.839 73.2244   5
   0   6   3 880.814 72.9450   5
   0  -6   3 873.266 72.7642  10
   0  -6  -3 862.479 72.0879  11
   0   6   3 946.319 72.4388  11
   0   6  -3 797.935 72.2805  10
   0   6   3 864.096 72.9001   9
   0  -6  -3 905.377 72.7471   9
   0   6  -3 886.835 72.7494   9
   0  -6   3 860.721 72.5177   9
   0  -6  -3 968.487 74.9121   7
   0   6  -3 774.161 74.9338   7
   0   6   3 869.014 73.5033   7
   0   6   4 2.19479 2.23089   3
   0  -6  -4 0.23437 1.79795   3
   0  -6  -4 1.24586 4.25563   1
   0  -6   4 0.93166 6.31801   1
   0   6   4 1.21217 3.86549  12
   0   6   4-1.04228 6.36758  13
   0  -6   4 0.66436 4.09574  12
   0  -6   4 0.94642 3.13994   6
   0   6   4-0.69774 4.69788   5
   0   6  -4 1.40887 2.86273   5
   0  -6  -4 2.33587 4.62828   5
   0   6  -4-0.66895 4.43739  11
   0  -6   4 3.34889 3.67478  10
   0  -6  -4 2.63330 2.84974  11
   0   6   4-1.65709 2.91100  11
   0   6   4-1.78628 4.21054   9
   0   6  -4 5.82406 3.31637  10
   0  -6   4 3.52792 3.56442   9
   0   6  -4 4.82624 3.96526   9
   0  -6  -4 7.59234 6.84260   7
   0   6   4 1.54720 5.16992   7
   0  -6  -5 2.55425 2.10044   3
   0   6   5-0.34027 2.54783   3
   0  -6  -5 0.66542 3.91822   1
   0   6   5 0.66904 4.37018  12
   0   6   5 2.09533 6.04793  13
   0  -6   5 2.17667 4.43324  12
   0  -6   5 0.48043 3.46506   6
   0  -6  -5 0.90743 4.68585   5
   0   6   5 0.80857 5.11348   5
   0   6  -5-0.48019 3.72001   5
   0  -6   5 3.94449 3.87718  10
   0  -6  -5-0.34704 2.48798  11
   0   6  -5 6.31898 4.83026  11
   0   6   5 8.39620 3.19393  11
   0   6  -5-0.52893 3.40125   9
   0   6  -5-0.48923 3.04316  10
   0  -6   5 0.50098 3.27321   9
   0   6   5 3.02428 3.98194   9
   0   6   5-0.84396 5.63987   7
   0  -6  -5-1.01595 6.42447   7
   0   6   6 1327.91 109.452   3
   0  -6  -6 1345.65 109.182   3
   0  -6  -6 1396.84 109.454   2
   0  -6  -6 1324.07 110.716   1
   0   6   6 1298.15 110.710  12
   0   6   6 1434.66 112.720  13
   0   6   6 1386.70 109.241  11
   0  -6   6 1413.37 111.297  12
   0   6  -6 1433.57 111.109  11
   0   6  -6 1383.40 110.422   5
   0   6   6 1350.55 112.199   6
   0  -6   6 1284.73 109.759   6
   0  -6  -6 1296.26 112.035   5
   0  -6  -6 1343.33 109.050  11
   0  -6   6 1421.94 110.290  10
   0   6  -6 1312.75 109.764  10
   0  -6   6 1407.17 109.921   9
   0   6  -6 1390.19 110.049   9
   0   6   6 1341.55 110.370   9
   0  -6  -6 1289.73 112.297   7
   0   6   7 1970.58 171.111   3
   0  -6  -7 2071.25 170.842   3
   0  -6  -7 2024.28 172.295   1
   0  -6  -7 2278.91 171.051   2
   0   6   7 2247.93 174.348  13
   0   6   7 2130.37 172.537  12
   0   6  -7 2184.16 172.544  11
   0   6   7 2092.18 170.346  11
   0  -6   7 2190.16 172.992  12
   0   6   7 2258.60 170.478  11
   0   6  -7 2129.72 172.389   5
   0  -6  -7 2046.11 174.077   5
   0   6   7 2132.04 173.876   6
   0   6  -7 2058.98 171.192  10
   0  -6   7 2239.51 171.689  10
   0  -6   7 2102.69 171.195   9
   0   6   7 2125.54 171.785   9
   0   6  -7 2173.64 171.379   9
   0  -6  -7 2013.38 174.081   7
   0  -6  -8 6.02806 3.30902   3
   0  -6  -8-0.84187 4.56057   1
   0  -6  -8 4.63165 3.16642   2
   0   6   8 3.62476 6.83451  13
   0   6   8 2.60792 4.37656  12
   0   6   8 0.74123 2.14875  11
   0  -6   8-0.96879 5.12695  12
   0   6   8 7.10730 6.41537   6
   0  -6  -8 10.6666 7.22072   5
   0   6  -8 6.22559 5.76396   7
   0   6  -8-1.80669 5.11070   5
   0   6  -8 2.40137 4.43384  11
   0  -6   8 2.29361 3.37823  10
   0   6   8 3.31296 2.30219  11
   0   6  -8-1.00141 3.24724   9
   0   6   8-0.63380 4.01000   9
   0   6  -8 1.54345 3.25617  10
   0  -6   8-0.48710 2.95224   9
   0  -6  -8 6.64502 6.94775   7
   0  -6  -9 4.09783 3.31912   2
   0  -6  -9-2.76503 4.51433   1
   0   6   9-0.94181 5.09974  12
   0   6   9-1.28624 6.12223  13
   0   6   9 2.89739 1.68621  11
   0  -6   9 1.05810 5.46272  12
   0   6   9 1.14166 1.74426  11
   0   6   9 2.53810 6.38586   6
   0   6  -9-5.26236 5.50118   5
   0  -6  -9 13.3708 7.95227   5
   0   6  -9 6.98296 5.58268   7
   0   6  -9 0.83114 4.29113  11
   0  -6   9 2.30011 3.28608  10
   0   6  -9 0.52613 3.09740  10
   0   6   9-0.64407 3.64280   9
   0   6  -9-2.92461 3.18348   9
   0  -6   9-1.92047 3.20833   9
   0  -6  -9 0.50605 3.22664   8
   0  -6  -9-1.46336 7.55481   7
   0  -6 -10 113.726 11.5219   2
   0  -6  10 125.060 14.5936  13
   0   6  10 135.408 15.8745  13
   0   6  10 111.800 13.3881  12
   0   6 -10 105.571 13.7818   7
   0  -6 -10 103.527 15.8092   5
   0   6 -10 114.651 14.4248   5
   0   6  10 115.366 15.2858   6
   0  -6 -10 115.847 13.5075   1
   0  -6  10 114.981 11.6214  10
   0   6 -10 109.299 12.7439  11
   0   6 -10 106.678 11.2681  10
   0   6 -10 109.897 11.0349   9
   0   6  10 129.235 12.1530   9
   0  -6  10 103.217 11.0017   9
   0  -6 -10 114.995 11.3527   8
   0  -6 -10 88.1238 14.8076   7
   0  -6  11 5.47493 6.43512  13
   0   6  11 1.48056 7.06241  13
   0   6  11 8.88956 5.89680  12
   0   6  11 12.9810 7.36728   6
   0  -6 -11 3.61314 8.09047   5
   0   6 -11 10.9248 6.42046   5
   0  -6 -11 7.71101 5.56259   1
   0  -6 -11 4.34478 3.50470   2
   0  -6  11 6.96992 3.54704  10
   0   6 -11-0.88836 4.77799  11
   0   6  11 6.59562 3.79754   9
   0  -6  11 6.43527 3.15158   9
   0   6 -11 10.3616 3.17649   9
   0  -6 -11-1.74338 7.93705   7
   0   6 -11 4.99609 6.30221   7
   0  -6 -11 4.84408 3.14159   8
   0  -6 -12 88.4433 9.26223   2
   0  -6  12 72.7758 12.5527  13
   0   6  12 55.3894 11.4497  13
   0   6  12 93.7160 11.7252  12
   0  -6 -12 39.5006 11.1179   5
   0   6  12 59.7022 11.7156   6
   0   6 -12 68.7607 12.3462   5
   0  -6 -12 51.7467 10.4341   1
   0   6 -12 78.6208 10.4102  11
   0  -6  12 80.5219 8.66378  10
   0   6 -12 78.1398 7.94133   9
   0   6  12 67.0209 8.65381   9
   0  -6 -12 74.3105 8.32964   8
   0  -6 -12 45.9968 12.8374   7
   0   6 -12 97.8489 13.0131   7
   0  -6 -13 95.5181 12.0167   2
   0  -6 -13 117.224 13.1421   4
   0   6  13 121.438 15.2722  12
   0   6  13 122.152 16.6378  13
   0  -6  13 123.945 16.1000  13
   0  -6 -13 111.726 18.0585   5
   0   6  13 129.883 16.4632   6
   0   6 -13 116.967 16.9136   5
   0  -6 -13 110.030 14.7266   1
   0  -6  13 125.604 12.0404  10
   0   6 -13 118.323 13.5062  11
   0  -6 -13 123.391 12.0319   8
   0   6  13 101.489 11.9428   9
   0   6 -13 115.000 11.1224   9
   0  -6 -13 96.3696 16.9653   7
   0   6 -13 134.153 16.4816   7
   0  -6 -14 95.6563 11.4637   2
   0  -6 -14 101.422 11.8716   4
   0  -6 -14 107.238 14.1767   1
   0  -6  14 106.200 15.5155  13
   0   6  14 72.5355 14.3328  13
   0   6  14 97.2727 13.9373  12
   0   6  14 122.159 16.3751   6
   0   6 -14 78.3919 14.7041   5
   0  -6 -14 114.064 18.7578   5
   0  -6  14 87.0824 10.4831  10
   0   6 -14 111.296 12.5242  11
   0  -6 -14 109.391 10.9816   8
   0   6  14 123.266 11.4981   9
   0  -6 -14 68.3797 15.8094   7
   0   6 -14 99.9091 15.1405   7
   0  -6 -15 174.845 21.3472   1
   0  -6  15 225.361 24.0546  13
   0   6  15 152.988 20.6123  12
   0   6 -15 175.985 19.3261  11
   0  -6 -15 175.239 24.7461   7
   0   6 -15 202.968 23.6705   7
   0  -6 -15 219.814 19.4448   4
   0  -6 -15 209.752 19.2557   2
   0   6  15 213.272 23.9119   6
   0  -6 -15 202.897 26.4399   5
   0   6 -15 157.163 23.1553   5
   0  -6 -16 8.11796 7.84485   1
   0  -6  16 10.0543 9.85191  13
   0   6  16 7.92039 7.31916  12
   0   6 -16-2.22044 10.0948   5
   0   6  16-7.71769 9.83887   6
   0  -6 -16 8.07960 11.2126   5
   0   6 -16-0.99066 5.54992  11
   0  -6 -16 7.23888 4.85043   2
   0   6 -16 4.10590 9.02801   7
   0  -6 -16 2.66129 10.6454   7
   0  -6  17 318.947 32.0914  13
   0   6  17 256.112 28.8223  12
   0   6  17 268.143 30.6921   6
   0  -6 -17 330.910 35.5838   5
   0   6 -17 257.161 32.1091   5
   0   6 -17 268.626 26.4804  11
   0  -6 -17 237.179 33.3770   7
   0   6 -17 319.631 32.7243   7
   0  -6 -17 291.888 29.9961   1
   0   6  18 25.7791 10.9752   6
   0  -6 -18 3.07563 13.0655   5
   0   6 -18 5.19507 10.8360   5
   0  -6  18 2.29168 9.00082  13
   0   6  18 5.36265 7.18534  12
   0  -6 -18 15.2874 13.4596   7
   0   6 -18 12.1445 11.4127   7
   0  -6 -18 12.8157 9.11956   1
   0   6  19 27.2373 11.9417   6
   0  -6 -19 22.8875 15.9563   5
   0   6 -19 47.4134 15.6112   5
   0  -6  19 14.5703 10.5539  13
   0   6  19 37.8708 10.2779  12
   0  -6 -19 26.0757 14.7533   7
   0   6 -19 36.8549 13.9503   7
   0  -6 -19 27.0864 10.4904   1
   0   6 -20 232.711 32.3013   5
   0   6  20 278.697 31.5564   6
   0  -6 -20 281.627 36.3113   5
   0  -6  20 256.526 31.8693  13
   0   6  20 300.201 30.3021  12
   0   6 -20 247.534 32.6951   7
   0  -6 -20 235.668 34.5096   7
   0  -6 -20 257.037 29.5998   1
   0   6  21 7.52821 10.4457   6
   0  -6 -21-18.3875 16.4424   5
   0   6 -21 3.18185 13.4965   5
   0  -6  21-2.42402 10.6564  12
   0  -6  21-8.14864 10.6342  13
   0   6  21-2.11248 8.79379  12
   0   6 -21 3.06416 12.2541   7
   0  -6 -21-3.72518 16.6555   7
   0  -6 -21 2.14651 8.93541   1
   0  -6 -22 3.89240 16.5324   5
   0   6 -22-6.76471 15.3967   5
   0   6  22 10.4885 12.5107   6
   0   6  22 20.0378 10.3173  12
   0  -6  22 15.3012 11.6228  12
   0  -6  22 19.9895 12.1433  13
   0   6 -22 9.87354 12.6308   7
   0  -6 -22 19.6718 18.4692   7
   0  -6 -22 6.73228 9.01604   1
   0   6  23 666.888 60.0193   6
   0   6 -23 566.217 61.9924   5
   0  -6 -23 598.649 64.3076   5
   0   6  23 647.191 57.7286  12
   0  -6  23 568.173 58.1352  12
   0  -6  23 610.938 59.9590  13
   0  -6 -23 571.825 64.3464   7
   0   6 -23 514.778 60.8929   7
   0  -6 -23 574.601 57.0471   1
   0  -6 -24 220.448 34.2292   5
   0   6 -24 186.091 30.6973   5
   0  -6  24 228.845 29.6480  13
   0  -6  24 164.206 27.1209  12
   0   6  24 216.082 26.8408  12
   0   6 -24 241.113 33.6139   7
   0  -6 -24 172.192 31.4762   7
   0  -6 -24 190.116 26.1728   1
   0   6 -25 328.371 40.8474   5
   0  -6 -25 294.740 42.4539   5
   0  -6  25 304.430 35.8815  12
   0  -6  25 307.700 36.6432  13
   0   6  25 268.163 33.8172  12
   0  -6 -25 318.150 35.1669   1
   0   6 -25 289.134 39.5922   7
   0  -6 -25 178.197 38.4913   7
   0  -6 -26 37.6884 13.9688   1
   0   6 -26 54.7393 20.3297   5
   0  -7   0-3.36927 4.69965   6
   0   7   0-0.90743 2.92149   5
   0   7   0 9.94283 4.74524   6
   0   7   0-16.5828 15.5075   7
   0  -7   0 5.89991 8.66867   7
   0   7   0 2.53526 4.04080  11
   0  -7   0-2.66971 4.93343  10
   0  -7   0 2.29691 4.67687   1
   0  -7   1 235.215 22.3635   1
   0  -7  -1 233.786 22.0160   1
   0   7  -1 221.227 19.7172   5
   0   7   1 228.525 20.5040   5
   0   7  -1 242.492 21.6628   6
   0  -7   1 216.055 21.3349   6
   0   7   1 216.539 22.0007   6
   0  -7  -1 194.547 26.9912   7
   0  -7   1 211.986 23.7591   7
   0   7  -1 194.096 28.2548   7
   0   7   1 254.419 24.0585   7
   0   7   1 236.051 21.4377  11
   0   7  -1 251.856 21.8902  11
   0  -7   1 217.446 21.5228  10
   0  -7  -1 215.273 20.9691  11
   0   7  -1 245.380 21.7605   9
   0   7   1 310.701 20.6086   3
   0  -7  -2 6.96059 4.72798   1
   0  -7   2 5.14783 5.10629   1
   0   7  -2-5.11198 9.45065   7
   0  -7  -2-10.5434 12.9918   7
   0   7   2 0.76412 5.44483   7
   0  -7   2 4.78810 4.35142   6
   0   7   2 3.37905 5.21362   6
   0  -7  -2 2.56524 4.41991   5
   0   7  -2 5.28203 3.98934   6
   0   7   2 7.65078 4.31584   5
   0   7  -2 10.4825 5.01348  11
   0   7   2 0.57039 3.79298  11
   0  -7  -2 0.51461 3.69673  11
   0   7  -2 9.10643 4.57607   9
   0  -7   2 0.65561 4.15481  10
   0   7   2 0.67916 4.58016   9
   0   7   2 4.16003 1.98601   3
   0  -7   3 1162.59 94.1922   1
   0  -7  -3 1157.47 93.1853   1
   0   7  -3 1025.00 95.2264   7
   0  -7  -3 1054.16 95.5255   7
   0   7   3 1076.53 93.3859   7
   0  -7   3 1174.40 93.4046  12
   0   7   3 1122.90 92.8455   5
   0  -7   3 1112.62 92.5306   6
   0   7   3 1148.82 94.1349   6
   0  -7  -3 1208.18 93.4177   5
   0   7  -3 1169.47 91.1303   5
   0   7  -3 1100.92 92.4820   6
   0  -7  -3 1107.57 92.1364  11
   0   7   3 1176.90 92.5372  11
   0  -7   3 1164.13 93.0114  10
   0   7   3 1108.96 93.0217   9
   0   7  -3 1181.69 93.0134   9
   0   7   3 1119.21 91.0500   3
   0  -7  -4 4.15303 2.22087   3
   0   7   4 1.96963 2.28274   3
   0  -7  -4 6.44859 4.53488   1
   0  -7   4-1.02823 5.31212   1
   0   7   4 0.68547 3.84130  12
   0  -7   4 6.78582 4.92777  12
   0   7  -4 0.67583 2.76576   5
   0   7   4 3.64550 5.12361   5
   0  -7   4-0.55986 3.85608   6
   0  -7  -4 6.66418 4.86019   5
   0  -7   4 3.29351 3.91960  10
   0   7  -4 0.76615 5.23629  11
   0   7   4 5.07882 3.59600  11
   0  -7  -4 1.36795 3.43755  11
   0   7  -4 3.17785 3.92208   9
   0   7   4 0.69562 4.32908   9
   0  -7  -4-1.13436 7.29369   7
   0   7   4 4.19671 5.44182   7
   0   7   5 426.221 34.1028   3
   0  -7  -5 415.702 33.8043   3
   0  -7   5 377.878 37.3813   1
   0  -7  -5 393.637 35.7156   1
   0   7   5 335.056 37.1905  13
   0   7   5 389.592 35.6456  12
   0   7   5 439.779 34.8466  11
   0  -7   5 432.797 36.2360  12
   0   7  -5 421.014 36.2632  11
   0  -7  -5 374.737 36.3834   5
   0   7   5 407.847 36.2538   5
   0   7  -5 419.543 34.6551   5
   0  -7   5 424.078 35.0857   6
   0  -7  -5 406.034 34.4358  11
   0  -7   5 427.005 35.5734  10
   0   7  -5 381.292 35.1901   9
   0   7   5 420.212 35.7508   9
   0   7   5 386.256 36.4707   7
   0  -7  -5 454.334 38.2604   7
   0   7   6 4.05599 2.92585   3
   0  -7  -6 1.98582 2.37293   3
   0  -7  -6 3.92894 4.92789   1
   0  -7   6 7.71988 7.12389   1
   0   7   6-1.25644 6.56780  13
   0   7   6 1.58502 4.38874  12
   0  -7   6 0.86819 4.91095  12
   0  -7  -6 1.08623 5.32093   5
   0   7  -6 3.56489 4.20138   5
   0   7   6 1.12799 5.75098   6
   0  -7   6-2.81672 3.98369   6
   0  -7  -6-0.39647 2.69027  11
   0   7   6 0.43981 2.98393  11
   0  -7   6 1.99859 3.99741  10
   0   7  -6-1.66948 4.77075  11
   0   7   6-0.71480 4.32834   9
   0   7  -6 3.71903 3.61473   9
   0  -7  -6 7.33655 6.23399   7
   0   7   7 485.941 44.9844   3
   0  -7  -7 525.222 44.6604   3
   0  -7  -7 503.204 46.4276   1
   0  -7  -7 559.418 45.0811   2
   0   7   7 588.612 49.0329  13
   0   7   7 572.116 46.9002  12
   0   7  -7 593.279 47.1844  11
   0   7   7 586.664 44.8967  11
   0   7   7 526.022 44.6135  11
   0  -7   7 557.401 47.3241  12
   0   7   7 537.100 48.4098   6
   0  -7  -7 498.883 47.9301   5
   0   7  -7 550.452 46.3140   5
   0  -7   7 515.735 45.4400   6
   0  -7   7 542.587 45.9396  10
   0   7  -7 587.648 45.9273   9
   0   7   7 546.543 46.2842   9
   0  -7  -7 536.578 48.8806   7
   0   7   8 131.405 13.4995   3
   0  -7  -8 133.657 13.0162   3
   0  -7  -8 138.089 14.9979   1
   0  -7  -8 154.712 13.4581   2
   0   7   8 151.048 17.4067  13
   0   7   8 151.503 15.3165  12
   0   7  -8 137.022 15.0913  11
   0  -7   8 149.755 15.8899  12
   0   7   8 139.179 12.6145  11
   0   7   8 137.811 12.5576  11
   0  -7  -8 138.350 17.1763   5
   0   7  -8 134.307 15.0426   5
   0  -7   8 122.643 13.5223   6
   0   7   8 124.559 16.6136   6
   0  -7   8 136.884 14.0124  10
   0   7  -8 140.718 13.7927   9
   0   7   8 145.715 14.5980   9
   0  -7  -8 124.939 17.0811   7
   0  -7  -9 495.378 39.9058   2
   0  -7  -9 426.172 41.3131   1
   0   7   9 450.523 41.5676  12
   0   7   9 516.422 43.9298  13
   0  -7   9 487.540 42.4278  12
   0   7  -9 445.047 41.5065  11
   0   7   9 482.240 38.8118  11
   0   7   9 468.617 38.7300  11
   0   7  -9 445.759 41.8045   5
   0   7   9 479.996 43.5216   6
   0  -7  -9 476.062 44.1326   5
   0  -7   9 508.167 40.5794  10
   0   7   9 446.499 40.5808   9
   0   7  -9 474.133 40.0559   9
   0  -7  -9 456.554 44.0621   7
   0   7  -9 490.434 42.1410   7
   0  -7 -10 41.4860 5.84288   2
   0  -7 -10 47.7934 8.17612   1
   0   7  10 55.4405 10.7119  13
   0   7  10 39.3799 7.88075  12
   0   7  10 37.4305 4.27608  11
   0   7  10 43.1783 4.43833  11
   0  -7  10 37.4370 7.84405  12
   0   7 -10 31.8273 7.79872   7
   0   7  10 40.4877 9.53047   6
   0  -7 -10 42.0722 10.7564   5
   0   7 -10 56.6877 9.43497   5
   0  -7  10 38.3966 6.21645  10
   0   7 -10 48.1762 7.87321  11
   0   7 -10 37.4017 5.71915   9
   0   7  10 33.2231 6.44648   9
   0  -7 -10 39.1869 5.82751   8
   0  -7 -10 28.7641 9.29130   7
   0  -7 -11 1437.26 119.210   2
   0  -7 -11 1410.51 121.219   1
   0   7  11 1458.26 121.448  12
   0  -7  11 1537.77 122.934  13
   0   7  11 1508.68 123.474  13
   0  -7  11 1405.12 121.967  12
   0   7 -11 1556.34 121.051  11
   0   7  11 1454.84 123.093   6
   0  -7 -11 1345.65 123.928   5
   0   7 -11 1432.27 122.184   5
   0  -7  11 1465.51 119.381  10
   0   7  11 1540.95 119.953   9
   0   7 -11 1430.64 118.857   9
   0  -7 -11 1498.51 119.144   8
   0   7 -11 1578.14 122.362   7
   0  -7 -11 1432.86 124.203   7
   0  -7 -12 193.538 18.0904   2
   0  -7 -12 174.729 19.9735   1
   0   7  12 212.956 20.9137  12
   0  -7  12 176.835 21.0546  13
   0   7  12 217.831 22.9315  13
   0   7 -12 206.175 19.6918  11
   0  -7  12 176.570 21.0372  12
   0   7 -12 171.026 21.0313   5
   0  -7 -12 205.536 24.2304   5
   0   7  12 222.186 22.8374   6
   0  -7  12 167.146 17.7013  10
   0   7  12 191.722 18.4130   9
   0   7 -12 194.362 17.3439   9
   0  -7 -12 172.005 17.4618   8
   0  -7 -12 182.606 23.4519   7
   0   7 -12 194.955 21.2734   7
   0  -7 -13 466.621 39.7697   2
   0  -7 -13 462.559 42.3088   1
   0   7  13 442.528 41.9859  12
   0   7  13 452.861 44.0779  13
   0  -7  13 525.794 44.5242  13
   0   7 -13 503.100 41.4873  11
   0   7  13 398.776 43.0839   6
   0  -7 -13 398.432 44.8128   5
   0   7 -13 453.349 43.6888   5
   0  -7  13 467.104 39.4649  10
   0   7  13 508.886 40.2038   9
   0   7 -13 432.223 38.6000   9
   0  -7 -13 500.333 46.5046   7
   0  -7 -13 454.290 39.2614   8
   0   7 -13 453.728 43.1607   7
   0  -7 -14 90.3090 10.1181   2
   0  -7 -14 97.7993 11.4556   4
   0  -7 -14 54.4700 11.4392   1
   0  -7  14 69.0451 13.0926  13
   0   7  14 62.9823 13.2703  13
   0   7  14 73.9679 12.1783  12
   0   7  14 59.5817 13.5383   6
   0  -7 -14 106.223 16.9265   5
   0   7 -14 104.731 15.5710   5
   0  -7  14 69.1250 8.91145  10
   0   7 -14 75.8464 10.7032  11
   0   7  14 92.7869 10.0225   9
   0  -7 -14 77.6740 16.9934   7
   0   7 -14 85.5620 13.9231   7
   0  -7 -14 70.4094 8.98606   8
   0  -7 -15 254.956 25.8780   1
   0   7  15 241.205 25.5514  12
   0  -7  15 241.924 27.4329  13
   0   7  15 251.610 27.8470  13
   0   7 -15 266.797 24.2894  11
   0  -7 -15 198.645 28.4236   7
   0   7 -15 252.554 27.2622   7
   0  -7 -15 232.527 23.4505   4
   0  -7 -15 239.349 22.5977   2
   0   7  15 217.197 26.6755   6
   0  -7 -15 257.038 30.3227   5
   0   7 -15 201.209 26.6297   5
   0   7  16 29.1631 8.94165  12
   0  -7  16 38.7028 11.2875  13
   0   7  16 27.7936 11.0352  13
   0   7  16 12.0587 9.29670   6
   0  -7 -16 13.6764 10.8468   5
   0   7 -16 15.3285 11.7126   5
   0   7 -16 26.4878 7.46662  11
   0  -7 -16 27.8733 9.24080   1
   0  -7 -16-2.74381 12.9820   7
   0   7 -16 24.4884 9.86604   7
   0  -7  17 239.904 28.7267  13
   0   7  17 196.869 28.1151  13
   0   7  17 240.744 26.9948  12
   0   7 -17 258.599 30.1522   5
   0  -7 -17 207.415 31.2928   5
   0   7  17 233.162 29.0842   6
   0   7 -17 271.364 25.0765  11
   0  -7 -17 241.558 31.8171   7
   0   7 -17 301.823 30.8595   7
   0  -7 -17 277.231 27.8490   1
   0   7  18 58.1270 13.8887   6
   0   7 -18 56.2899 15.5622   5
   0  -7 -18 49.9299 15.5027   5
   0  -7  18 67.2082 14.2208  13
   0   7  18 51.0004 12.1628  12
   0  -7 -18 47.2476 17.9948   7
   0   7 -18 67.3791 15.2293   7
   0  -7 -18 52.0457 11.9052   1
   0   7 -19-8.26563 12.7225   5
   0  -7 -19 19.9518 15.1130   5
   0   7  19-9.37183 10.8189   6
   0  -7  19 2.46493 10.0606  13
   0   7  19 11.5511 8.74989  12
   0  -7 -19-6.71171 13.4199   7
   0   7 -19 2.60609 11.0539   7
   0  -7 -19 5.88921 8.32665   1
   0   7  20-2.46810 10.0739   6
   0  -7 -20 3.52451 12.5409   5
   0   7 -20-8.84908 13.6208   5
   0  -7  20 13.0147 9.26219  13
   0   7  20-4.06320 8.77593  12
   0  -7 -20 3.56513 14.8392   7
   0   7 -20 14.0729 13.3969   7
   0  -7 -20 2.06644 8.76557   1
   0  -7 -21 37.3633 18.2873   5
   0   7 -21 40.9044 16.1102   5
   0   7  21 36.1352 13.8153   6
   0  -7  21 35.6262 13.1910  13
   0   7  21 44.9447 12.3415  12
   0  -7 -21 41.5338 19.2311   7
   0   7 -21 39.4162 14.5260   7
   0  -7 -21 28.2287 12.3849   1
   0   7 -22 56.8672 18.0400   5
   0   7  22 37.9692 15.1045   6
   0  -7 -22 70.9818 20.2627   5
   0   7  22 85.5443 15.4899  12
   0  -7  22 46.2506 16.3283  13
   0   7 -22 71.6263 18.7641   7
   0  -7 -22 72.7481 21.2523   7
   0  -7 -22 90.4326 15.8739   1
   0   7  23 14.1259 12.6907   6
   0   7 -23 46.0773 18.1097   5
   0  -7 -23 12.4601 16.9958   5
   0  -7  23 12.1125 12.9023  13
   0   7  23 23.6508 12.1187  12
   0  -7  23 13.5302 12.3596  12
   0   7 -23 17.4320 14.5630   7
   0  -7 -23 17.0211 19.3783   7
   0  -7 -23 2.36688 10.9980   1
   0  -7 -24-4.37467 18.5860   5
   0   7 -24 44.9608 17.6015   5
   0   7  24 12.3551 11.6364  12
   0  -7  24 48.1022 15.1834  12
   0  -7  24 9.49126 12.6969  13
   0   7 -24 22.3436 16.4045   7
   0  -7 -24 18.1166 18.8816   7
   0  -7 -24-2.47457 10.5505   1
   0  -7 -25 9.17721 17.5700   5
   0   7 -25-11.8545 17.0697   5
   0  -7  25-6.59710 13.1931  13
   0   7  25-10.3568 13.0309  12
   0  -7  25 2.94136 13.1531  12
   0  -7 -25 12.9204 10.5497   1
   0   7 -25-11.9006 15.1899   7
   0  -7 -25-4.74201 20.8462   7
   0   7 -26 12.5032 17.0388   5
   0  -8   0 243.485 21.8034  10
   0   8   0 249.961 21.8086  11
   0  -8   0 182.573 23.5686   7
   0  -8   0 263.833 22.6652   1
   0   8   0 243.387 19.8636   5
   0   8   0 214.017 21.7449   6
   0  -8   1 1378.06 108.993   1
   0  -8  -1 1362.49 108.577   1
   0  -8   1 1279.00 109.830   7
   0  -8  -1 967.096 110.849   7
   0   8  -1 837.672 112.098   7
   0   8   1 1464.54 110.504   7
   0   8  -1 1295.36 107.917   6
   0   8   1 1297.86 106.616   5
   0   8   1 1399.68 108.852   6
   0   8  -1 1235.66 105.790   5
   0   8  -1 1297.74 108.037  11
   0  -8   1 1332.28 108.033  10
   0   8   1 1355.51 107.842  11
   0   8  -1 1270.13 107.961   9
   0   8   1 1680.71 106.853   3
   0  -8   2 279.680 25.3220   1
   0  -8  -2 294.956 24.7513   1
   0   8  -2 187.470 27.4108   7
   0   8   2 251.412 24.7697   7
   0   8  -2 277.527 24.4733  11
   0   8   2 266.209 23.8619  11
   0   8   2 246.885 23.1983   5
   0   8   2 301.785 25.5335   6
   0   8  -2 266.653 23.9093   6
   0  -8   2 275.389 24.3226  10
   0   8   2 258.712 24.0824   9
   0   8  -2 282.368 24.3395   9
   0   8   2 267.491 21.9157   3
   0  -8  -3 62.5022 8.97762   1
   0  -8   3 55.8783 9.69795   1
   0  -8  -3 23.3849 12.3986   7
   0   8   3 61.3036 8.94456   7
   0   8  -3 59.3646 12.6220   7
   0  -8   3 67.5069 8.92282  12
   0   8  -3 63.3192 7.88935   6
   0   8   3 44.9843 9.09942   6
   0   8  -3 58.3020 5.92780   5
   0   8   3 70.0534 8.42541   5
   0  -8  -3 65.2759 9.24044   5
   0   8   3 62.9081 7.87569  11
   0   8   3 68.7528 8.92370   9
   0  -8   3 51.6927 8.31771  10
   0   8  -3 71.5107 8.89635   9
   0   8   3 55.9454 5.90737   3
   0  -8   4 2.28711 6.10614   1
   0  -8  -4 6.58361 5.05055   1
   0   8   4 17.8848 6.37576   7
   0   8  -4 14.6246 9.58611   7
   0  -8  -4 11.5100 8.90536   7
   0  -8   4 14.4874 5.49606  12
   0   8  -4 11.9524 3.26071   5
   0   8   4 7.58692 4.74874   5
   0   8   4 8.72402 6.15873   6
   0  -8  -4 16.1618 5.78411   5
   0  -8  -4 10.7158 3.90206  11
   0   8   4 9.65745 4.02804  11
   0  -8   4 4.57616 4.34809  10
   0   8  -4 13.2715 4.92271   9
   0   8   4 11.1684 5.23479   9
   0  -8  -4 10.6661 2.65650   3
   0   8   4 10.7508 2.72760   3
   0   8   5 635.362 50.6125   3
   0  -8  -5 631.089 50.3228   3
   0  -8   5 572.388 54.3964   1
   0  -8  -5 683.181 53.0546   1
   0   8   5 589.342 52.5537  12
   0   8  -5 629.767 53.0822  11
   0   8   5 635.165 51.6553  11
   0  -8   5 653.300 53.1206  12
   0   8  -5 595.594 50.9748   5
   0  -8  -5 621.414 53.4856   5
   0  -8  -5 595.149 51.2048  11
   0  -8   5 607.495 52.3802  10
   0   8  -5 623.916 52.3070   9
   0   8   5 622.306 52.6525   9
   0  -8  -5 604.814 54.9494   7
   0   8   5 569.109 53.1002   7
   0   8   6 647.715 52.2382   3
   0  -8  -6 637.424 51.8400   3
   0  -8   6 595.543 56.1368   1
   0  -8  -6 642.141 54.2283   1
   0   8   6 477.531 55.6053  13
   0   8   6 611.975 54.0577  12
   0   8   6 695.879 53.0055  11
   0   8  -6 641.154 54.7705  11
   0  -8   6 629.842 54.6538  12
   0   8  -6 625.965 52.9688   5
   0  -8  -6 622.067 55.2177   5
   0  -8  -6 647.990 52.5415  11
   0  -8   6 648.274 53.8659  10
   0   8   6 661.835 54.1521   9
   0   8  -6 643.610 53.6963   9
   0  -8  -6 629.591 56.3674   7
   0  -8  -7 203.100 17.8717   3
   0   8   7 185.444 18.2513   3
   0  -8   7 196.287 22.9576   1
   0  -8  -7 200.302 18.4373   2
   0  -8  -7 185.754 19.9817   1
   0   8   7 223.734 23.3658  13
   0   8   7 199.853 20.2964  12
   0  -8   7 230.558 21.1192  12
   0   8  -7 234.903 21.1794  11
   0   8   7 216.105 18.6450  11
   0   8  -7 210.603 19.6003   5
   0  -8  -7 178.762 21.1665   5
   0   8   7 197.775 21.8286   6
   0  -8   7 216.270 19.8836  10
   0   8  -7 213.236 19.4648   9
   0   8   7 213.429 20.0907   9
   0  -8  -7 186.841 22.5023   7
   0   8   8 11.2576 3.86074   3
   0  -8  -8 7.80175 3.03008   3
   0  -8  -8 9.45338 4.87512   1
   0  -8  -8 13.3950 3.73969   2
   0   8   8 12.2660 7.33490  13
   0   8   8 9.79141 4.91728  12
   0   8   8 7.66230 2.93836  11
   0  -8   8 6.53027 5.52601  12
   0  -8  -8 11.2667 7.03146   5
   0   8   8 5.54976 7.46301   6
   0   8  -8 11.9593 5.45135   5
   0  -8   8 3.06930 4.57651  10
   0   8   8 15.2422 3.66055  11
   0   8  -8 12.0523 5.60910  11
   0   8  -8 11.1892 4.18199   9
   0   8   8 9.21226 4.54304   9
   0  -8  -8-6.15670 8.55307   7
   0  -8  -9 471.306 42.2001   1
   0  -8  -9 487.125 40.3643   2
   0   8   9 484.600 42.4271  12
   0  -8   9 470.841 42.8941  12
   0   8   9 483.834 44.7180  13
   0   8   9 469.544 39.5208  11
   0   8  -9 466.702 42.3345  11
   0   8   9 482.237 39.6525  11
   0   8   9 467.267 44.1301   6
   0   8  -9 509.807 42.7915   7
   0  -8  -9 430.693 43.9934   5
   0   8  -9 476.186 42.2374   5
   0  -8   9 507.497 41.3923  10
   0   8  -9 478.456 40.9039   9
   0   8   9 480.465 41.6351   9
   0  -8  -9 434.016 44.6649   7
   0  -8 -10 305.828 26.1899   2
   0  -8 -10 252.805 27.6082   1
   0  -8  10 297.401 28.8561  12
   0   8  10 293.903 30.4033  13
   0   8  10 273.913 27.9799  12
   0   8  10 304.501 25.0123  11
   0   8 -10 300.316 28.3074  11
   0   8  10 303.406 24.9100  11
   0   8 -10 308.521 28.9091   5
   0   8  10 328.049 30.7106   6
   0  -8 -10 272.901 30.2206   5
   0  -8  10 319.335 27.0354  10
   0   8 -10 277.725 26.3064   9
   0   8  10 294.236 27.2284   9
   0  -8 -10 280.131 26.2856   8
   0  -8 -10 293.036 31.1666   7
   0   8 -10 308.526 28.6930   7
   0  -8 -11 6.92676 5.70825   1
   0  -8 -11 10.8251 4.16722   2
   0   8  11 5.20728 8.05318  13
   0   8  11 2.38216 4.92410  12
   0   8  11 10.9166 2.38771  11
   0  -8  11 10.8371 6.58858  12
   0   8 -11 14.0051 6.70064   7
   0   8  11 6.53775 6.97663   6
   0   8 -11 9.18571 6.10987   5
   0  -8 -11 15.0275 8.97499   5
   0   8 -11 13.1895 6.26516  11
   0  -8  11 12.7040 4.59134  10
   0   8 -11 11.5874 4.07801   9
   0   8  11 5.20331 4.26073   9
   0  -8 -11 12.6293 4.27533   8
   0  -8 -11 3.86544 8.81876   7
   0  -8 -12 124.392 13.1346   2
   0  -8 -12 105.732 14.7214   1
   0   8  12 144.127 18.1613  13
   0  -8  12 116.372 16.3483  13
   0   8  12 107.047 14.9181  12
   0  -8  12 128.172 16.4385  12
   0   8 -12 144.365 17.2419   5
   0  -8 -12 126.886 18.4927   5
   0   8  12 145.963 17.8125   6
   0  -8  12 134.655 13.5442  10
   0   8 -12 128.550 15.1547  11
   0   8 -12 113.733 12.5798   9
   0   8  12 127.546 13.9202   9
   0  -8 -12 133.433 19.0459   7
   0   8 -12 129.918 16.4094   7
   0  -8 -12 132.942 13.1053   8
   0  -8 -13 44.3226 9.67808   1
   0  -8 -13 59.4641 8.09208   2
   0   8  13 61.4026 10.5863  12
   0   8  13 70.9446 12.4511  13
   0  -8  13 72.2906 12.3568  13
   0  -8  13 67.2744 11.9765  12
   0   8  13 65.3416 13.1153   6
   0  -8 -13 48.8637 12.6808   5
   0   8 -13 52.4425 11.6400   5
   0  -8  13 63.1219 8.43845  10
   0   8 -13 43.9160 9.50698  11
   0   8  13 68.3743 9.20329   9
   0   8 -13 57.9180 7.56260   9
   0   8 -13 71.2367 11.7389   7
   0  -8 -13 60.4570 14.3696   7
   0  -8 -13 65.4110 8.10845   8
   0  -8 -14 304.668 26.3056   2
   0  -8 -14 282.400 28.6269   1
   0   8  14 278.952 28.8092  12
   0  -8  14 290.388 29.6106  12
   0   8  14 310.463 31.8037  13
   0  -8  14 272.091 29.9443  13
   0   8 -14 305.566 28.0704  11
   0  -8 -14 278.501 32.5880   5
   0   8 -14 276.738 30.2471   5
   0   8  14 270.703 30.1975   6
   0  -8  14 273.043 25.6364  10
   0   8  14 270.456 26.2652   9
   0  -8 -14 286.885 25.6760   8
   0   8 -14 284.399 30.0999   7
   0  -8 -14 259.845 32.1189   7
   0  -8 -15 32.5207 9.65345   1
   0  -8  15 36.7006 10.5842  13
   0   8  15 55.6027 12.7461  13
   0   8  15 21.7263 9.16040  12
   0  -8  15 53.6614 11.5647  12
   0   8  15 32.0609 11.6550   6
   0  -8 -15 51.7275 14.9679   5
   0   8 -15 43.5977 11.7607   5
   0   8 -15 43.2256 8.84881  11
   0  -8 -15 46.3589 8.73652   4
   0   8 -15 35.5050 11.0354   7
   0  -8 -15 49.8569 15.3266   7
   0  -8 -16 448.845 45.4464   1
   0   8  16 520.454 48.6484  13
   0  -8  16 539.966 48.4171  13
   0   8  16 466.349 45.6563  12
   0   8 -16 453.497 43.8058  11
   0  -8 -16 457.623 50.3145   7
   0   8 -16 504.179 47.7432   7
   0  -8 -16 516.191 44.0505   4
   0   8  16 549.715 48.8246   6
   0  -8 -16 491.631 50.5358   5
   0   8 -16 464.152 47.9067   5
   0  -8  17 8.80961 10.3315  13
   0   8  17-9.47191 11.6011  13
   0   8  17 8.76698 8.10164  12
   0   8 -17 11.7015 10.9778   5
   0  -8 -17 2.96552 12.3465   5
   0   8  17 2.20185 8.62454   6
   0   8 -17-1.23190 6.20565  11
   0  -8 -17 3.53390 7.63760   1
   0   8 -17 8.83179 11.1139   7
   0  -8 -17 44.8289 15.6231   7
   0   8  18 107.356 17.7443  13
   0  -8  18 96.2882 17.3178  13
   0   8  18 87.1642 14.9118  12
   0   8 -18 123.705 19.0558   5
   0   8  18 118.072 18.1322   6
   0  -8 -18 101.325 20.4475   5
   0   8 -18 89.5105 13.2973  11
   0  -8 -18 91.6901 16.2789   1
   0  -8 -18 54.3002 18.1460   7
   0   8 -18 104.368 18.4385   7
   0   8  19 2.43411 10.1312   6
   0  -8 -19 26.9823 15.3286   5
   0   8 -19-2.71343 11.7201   5
   0  -8 -19 5.96230 9.03252   1
   0  -8 -19-13.8002 17.1301   7
   0   8 -19-2.62544 10.0519   7
   0   8  19-13.1370 12.6881  13
   0  -8  19 2.48663 10.1488  13
   0   8  19 5.87106 8.60261  12
   0  -8 -20 14.2926 14.5965   5
   0   8  20 12.7233 12.1276   6
   0   8 -20 17.4336 14.0453   5
   0  -8 -20 2.09112 9.52410   1
   0  -8 -20-14.6533 17.1890   7
   0   8 -20 5.66925 12.6886   7
   0   8  20 12.3681 8.43610  12
   0   8  20 16.5680 13.1576  13
   0  -8  20 7.90775 11.6035  13
   0   8  21 16.0386 11.7503   6
   0  -8 -21 11.3631 17.7610   5
   0   8 -21 9.32481 12.1679   5
   0  -8 -21-6.58035 9.80672   1
   0  -8 -21-7.75570 16.1403   7
   0   8 -21 12.2061 12.9430   7
   0  -8  21 8.31910 11.9776  13
   0   8  21-6.50327 9.36322  12
   0  -8 -22-3.99566 15.9830   5
   0   8  22-11.2172 13.3532   6
   0   8 -22 9.91756 15.0296   5
   0  -8 -22 4.56274 9.31943   1
   0  -8 -22 4.09261 16.0261   7
   0   8 -22 16.3779 13.3746   7
   0   8  22 9.10182 9.29531  12
   0  -8  22 20.3654 13.6479  13
   0   8  23 113.895 21.6421   6
   0   8 -23 147.125 25.9714   5
   0  -8 -23 126.502 27.1712   5
   0  -8 -23 145.406 20.9702   1
   0  -8 -23 122.175 25.8563   7
   0   8 -23 154.270 26.1482   7
   0  -8  23 131.480 21.8612  13
   0   8  23 126.405 20.4295  12
   0  -8 -24-8.86166 19.1380   5
   0   8  24-9.10319 14.0113   6
   0   8  24 9.94686 10.3501  12
   0  -8  24 3.19227 12.2220  13
   0  -8 -24-9.15879 17.5328   7
   0   8 -24-3.74391 14.3341   7
   0  -8 -24 4.97086 10.1439   1
   0  -8  25 129.640 22.7705  13
   0   8  25 98.7705 18.5139  12
   0  -8 -25 86.2886 25.2294   7
   0   8 -25 75.7229 23.7204   7
   0  -8 -25 80.2843 17.5898   1
   0  -9   0 1.38996 8.10262   7
   0   9   0 2.07955 12.2407   7
   0   9   0 0.71898 2.76866   5
   0   9   0-2.77286 5.69625   6
   0   9   0 3.31924 5.15871  11
   0  -9   0 1.76529 4.77929  10
   0  -9   0-1.01557 5.68334   1
   0  -9   1 333.740 31.4493   1
   0  -9  -1 336.513 31.1356   1
   0   9   1 356.966 32.6698   7
   0  -9   1 287.402 32.1415   7
   0  -9  -1 254.907 34.1060   7
   0   9  -1 198.715 36.6915   7
   0   9   1 333.996 30.3549  11
   0   9  -1 340.954 30.6465  11
   0  -9   1 340.696 30.6025  10
   0   9   1 419.945 29.0774   3
   0   9  -1 364.735 30.8744   9
   0   9  -1 338.374 28.0595   5
   0   9  -1 334.144 30.5714   6
   0   9   1 377.119 31.6406   6
   0   9   1 296.574 28.6471   5
   0  -9   2 54.5020 9.60910   1
   0  -9  -2 68.6348 10.0922   1
   0  -9  -2 40.7757 15.9863   7
   0   9  -2 49.5226 13.9922   7
   0   9   2 66.2002 9.88286   7
   0   9  -2 66.1159 8.90090   6
   0   9   2 63.2694 8.00312   5
   0   9   2 81.0346 10.5792   6
   0   9  -2 55.6426 9.05060  11
   0   9   2 46.6746 8.41518  11
   0  -9   2 74.7300 9.45827  10
   0   9  -2 65.1192 9.12612   9
   0   9   2 80.6768 9.48574   9
   0   9   2 64.8694 6.59096   3
   0  -9   3 1806.34 135.241   1
   0  -9  -3 1824.86 134.153   1
   0   9   3 1483.19 133.242   7
   0   9  -3 1204.90 135.092   7
   0  -9   3 1914.53 134.386  12
   0   9   3 1752.32 133.016  11
   0   9  -3 1570.56 132.734   6
   0   9   3 1568.22 132.486   5
   0  -9  -3 1843.18 134.157   5
   0   9  -3 1683.00 130.558   5
   0   9   3 1823.95 135.139   6
   0  -9   3 1731.23 133.632  10
   0   9   3 1715.12 133.679   9
   0   9  -3 1698.43 133.423   9
   0   9   3 1644.10 130.778   3
   0  -9   4 100.961 14.0147   1
   0  -9  -4 103.222 12.4279   1
   0   9   4 104.803 12.4957   7
   0  -9  -4 67.2730 15.7372   7
   0   9   4 127.585 11.7411  11
   0  -9   4 94.6202 12.2743  12
   0   9  -4 91.0986 11.1737   6
   0   9   4 97.8234 11.6300   5
   0   9   4 103.251 13.5821   6
   0  -9  -4 101.703 12.2907   5
   0   9  -4 90.6322 9.19805   5
   0   9  -4 102.619 11.8228   9
   0   9   4 95.6363 11.7993   9
   0  -9   4 105.208 12.0918  10
   0   9   4 96.2750 9.25966   3
   0  -9   5 259.166 26.5497   1
   0  -9  -5 264.712 24.9485   1
   0  -9  -5 258.816 27.8433   7
   0  -9   5 246.021 24.7000  12
   0   9  -5 272.972 25.3252  11
   0   9   5 259.683 23.5557  11
   0  -9  -5 247.995 25.1178   5
   0   9  -5 234.077 22.3367   5
   0  -9   5 260.165 24.3497  10
   0   9   5 275.304 24.8225   9
   0   9  -5 258.106 24.2296   9
   0   9   5 255.157 22.1205   3
   0  -9  -5 278.874 22.0481   3
   0   9   6 13.7299 3.42808   3
   0  -9  -6 17.0615 3.15714   3
   0  -9  -6 15.4028 5.31024   1
   0  -9   6 31.3766 8.71887   1
   0   9   6 19.8941 5.82555  12
   0  -9   6 23.6747 6.19328  12
   0   9  -6 14.8921 4.41411   5
   0  -9  -6 15.4295 5.87352   5
   0  -9   6 18.3869 5.40645  10
   0   9   6 16.4122 4.61448  11
   0   9  -6 7.27650 5.51777  11
   0   9   6 21.1988 5.96725   9
   0   9  -6 14.0124 5.32496   9
   0  -9  -6 7.82326 8.94111   7
   0  -9  -7 202.717 18.0802   3
   0   9   7 198.038 18.5385   3
   0  -9   7 191.348 22.9498   1
   0  -9  -7 187.638 20.4549   1
   0   9   7 139.991 22.4306  13
   0   9   7 213.638 20.9754  12
   0   9   7 237.364 19.5252  11
   0  -9   7 258.703 22.2078  12
   0   9  -7 223.530 21.4879  11
   0  -9  -7 197.281 21.8184   5
   0   9  -7 200.725 19.5537   5
   0  -9   7 252.102 20.9368  10
   0   9   7 205.984 20.7660   9
   0   9  -7 196.171 19.9287   9
   0  -9  -7 219.087 23.9060   7
   0   9   8 6.81027 3.36950   3
   0  -9  -8 2.06962 2.50902   3
   0  -9  -8 2.80068 3.39328   2
   0  -9  -8 2.03670 4.70399   1
   0  -9   8 3.48125 7.65241   1
   0   9   8 7.30832 5.25501  12
   0   9   8 3.57530 7.99341  13
   0  -9   8-3.47493 5.00471  12
   0   9   8 2.54424 3.29929  11
   0   9   8-4.48493 6.45851   6
   0  -9  -8 11.6300 6.60822   5
   0   9  -8-2.48931 5.11523   5
   0   9   8 2.72219 3.44476  11
   0   9  -8 2.21860 5.43443  11
   0  -9   8-4.35935 5.08403  10
   0   9   8-2.82807 4.68237   9
   0   9  -8-0.80219 3.93089   9
   0  -9  -8 9.97822 8.47845   7
   0   9   9-0.59210 3.24389   3
   0  -9  -9 3.18987 4.59388   1
   0  -9  -9-0.57292 3.06847   2
   0  -9   9 9.42366 8.42709   1
   0   9   9-1.10321 5.32857  12
   0   9   9 3.58776 7.60940  13
   0  -9   9 6.18860 5.15270  12
   0   9   9 0.93771 2.73519  11
   0   9  -9 4.87500 5.33987   5
   0   9   9-3.15159 6.92761   6
   0  -9  -9 7.99465 7.14943   5
   0   9  -9-2.28668 5.52235  11
   0  -9   9 1.73081 4.18049  10
   0   9   9 2.46068 3.24048  11
   0   9  -9 2.36193 4.01480   9
   0   9   9-0.95503 4.80673   9
   0  -9  -9 7.05577 8.01745   7
   0  -9 -10 29.0334 5.19465   2
   0  -9 -10 15.7156 6.25218   1
   0   9  10 24.0999 9.53104  13
   0   9  10 19.7525 6.72341  12
   0  -9  10 22.4392 6.92383  12
   0   9  10 29.8665 9.29373   6
   0   9 -10 24.7692 7.66319   5
   0  -9 -10 10.5374 7.96392   5
   0   9 -10 29.5545 7.48146   7
   0  -9  10 31.6154 6.23317  10
   0   9 -10 21.1630 7.12734  11
   0   9  10 25.3877 4.45696  11
   0   9 -10 23.7967 5.66527   9
   0   9  10 34.7416 7.26965   9
   0  -9 -10 22.7200 9.72563   7
   0  -9 -11 82.7895 9.61204   2
   0  -9 -11 66.6034 11.2076   1
   0   9  11 86.7094 15.2646  13
   0   9  11 81.4645 12.0467  12
   0  -9  11 88.7167 13.1063  12
   0   9  11 85.8750 8.43093  11
   0   9 -11 87.2189 12.3748   7
   0   9  11 98.9886 14.8475   6
   0   9 -11 70.4612 12.2347   5
   0  -9 -11 67.1055 14.3272   5
   0  -9  11 98.4951 10.7198  10
   0   9 -11 99.0247 12.5806  11
   0   9  11 76.9987 10.8475   9
   0   9 -11 83.5342 10.0345   9
   0  -9 -11 89.6654 10.3445   8
   0  -9 -11 54.3860 13.8672   7
   0  -9 -12 2.53937 5.39052   1
   0  -9 -12 4.85622 4.01124   2
   0  -9  12 4.90806 7.31830  13
   0   9  12 7.86493 6.42427  12
   0   9  12 5.90068 8.34586  13
   0  -9  12-1.51151 6.53296  12
   0   9 -12-1.44109 6.76158   5
   0   9  12-1.82823 7.46539   6
   0  -9 -12 2.08573 8.84971   5
   0   9 -12 2.85300 6.79374   7
   0   9 -12 6.18536 5.62723  11
   0  -9  12 4.14354 4.49332  10
   0   9  12-0.98223 5.26288   9
   0   9 -12 2.15458 3.80665   9
   0  -9 -12 4.32372 9.34070   7
   0  -9 -12 4.47911 4.27211   8
   0  -9 -13 36.7616 8.85392   1
   0  -9 -13 38.5598 6.67314   2
   0  -9  13 31.2066 10.3241  13
   0   9  13 58.3924 12.6941  13
   0   9  13 34.9020 8.45537  12
   0  -9  13 41.8276 10.0922  12
   0   9 -13 36.9213 9.90068   5
   0   9  13 55.4747 12.1241   6
   0  -9 -13 42.9506 12.3879   5
   0   9 -13 45.6189 9.00402  11
   0  -9  13 43.3348 7.20303  10
   0   9  13 49.3195 8.37255   9
   0   9 -13 33.0290 6.38311   9
   0   9 -13 44.0952 10.0669   7
   0  -9 -13 37.4981 12.9547   7
   0  -9 -13 43.9147 6.93608   8
   0  -9 -14 70.2095 11.8545   1
   0   9  14 71.7864 14.8987  13
   0   9  14 71.4173 12.0203  12
   0  -9  14 51.6759 11.7342  13
   0  -9  14 61.8945 11.8626  12
   0   9 -14 72.6831 13.3920   5
   0  -9 -14 61.0339 14.8687   5
   0   9  14 80.0740 14.1437   6
   0   9 -14 58.1837 10.8033  11
   0  -9  14 54.7958 8.65706  10
   0   9  14 78.9151 10.2439   9
   0   9 -14 37.8262 11.6958   7
   0  -9 -14 80.1972 16.7859   7
   0  -9 -14 74.6096 8.93565   8
   0  -9 -15 56.5325 11.0044   1
   0  -9  15 55.1617 12.3594  13
   0   9  15 53.6222 10.8926  12
   0   9  15 54.4299 13.4885  13
   0  -9  15 34.8789 11.2428  12
   0   9  15 58.7025 13.3796   6
   0  -9 -15 44.6688 15.2472   5
   0   9 -15 56.4055 13.0226   5
   0   9 -15 74.9943 11.2685  11
   0  -9 -15 74.3421 11.3016   4
   0  -9 -15 48.6585 15.4911   7
   0   9 -15 71.1051 13.1343   7
   0  -9 -16 31.7794 9.20484   1
   0  -9  16 8.37823 8.42638  13
   0   9  16 13.4339 8.60949  12
   0   9  16 2.39504 10.3858  13
   0  -9  16 15.6446 9.48853  12
   0   9 -16 33.9382 11.9057   5
   0   9  16 6.58841 9.53036   6
   0  -9 -16 2.82035 10.8373   5
   0   9 -16 10.6693 6.59641  11
   0  -9 -16 6.56277 6.75398   4
   0   9 -16 8.22928 8.44700   7
   0  -9 -16 8.71854 13.0258   7
   0   9  17 2.52455 9.88309  13
   0   9  17-3.55251 8.45464  12
   0  -9  17 8.93593 8.93376  13
   0  -9  17 8.28259 8.94405  12
   0  -9 -17-15.0538 14.3303   5
   0   9 -17-13.8389 11.4523   5
   0   9  17 2.30224 10.9581   6
   0   9 -17-6.75275 6.88499  11
   0  -9 -17 7.15382 7.99635   1
   0   9 -17 6.69609 9.97944   7
   0  -9 -17 3.07680 12.0449   7
   0   9  18 107.534 18.5400  13
   0  -9  18 104.235 18.1890  13
   0   9  18 79.2126 14.5450  12
   0  -9  18 87.9097 16.4083  12
   0   9 -18 84.6514 17.6238   5
   0   9  18 86.9005 17.2878   6
   0  -9 -18 118.908 21.8413   5
   0   9 -18 80.2509 12.8466  11
   0  -9 -18 98.4775 15.8469   1
   0  -9 -18 75.5835 19.1572   7
   0   9 -18 89.3701 17.6307   7
   0  -9  19 40.2583 13.7518  13
   0   9  19 61.5956 13.4090  12
   0   9  19 88.1599 17.6878  13
   0  -9 -19 69.9222 14.1461   1
   0  -9 -19 34.9932 16.4124   7
   0   9 -19 70.3974 16.6809   7
   0  -9 -19 88.9299 19.7728   5
   0   9  19 52.8544 15.0730   6
   0   9 -19 80.3083 16.8057   5
   0  -9  20 15.9276 11.0515  13
   0   9  20 14.6328 10.5212  12
   0   9  20-2.89015 13.7581  13
   0  -9 -20 2.10054 9.07603   1
   0   9 -20 16.8687 12.1458   7
   0  -9 -20-3.71309 16.0397   7
   0  -9 -20-3.62494 14.1925   5
   0   9 -20-17.2009 15.1674   5
   0   9  20 5.28020 11.2004   6
   0   9  21 33.2976 13.8511  13
   0  -9  21 44.8626 15.2668  13
   0   9  21 21.9458 10.7193  12
   0  -9 -21 17.6179 10.2953   1
   0  -9 -21 27.8403 19.2735   7
   0   9 -21 9.07419 14.0591   7
   0   9  21 13.8444 11.1886   6
   0  -9 -21 3.84094 16.0674   5
   0   9 -21 18.3540 13.9953   5
   0   9  22 234.643 31.7088  12
   0  -9  22 329.231 36.6230  13
   0   9  22 291.276 36.6641  13
   0  -9 -22 299.298 33.2432   1
   0  -9 -22 331.375 41.6767   7
   0   9 -22 295.503 37.9845   7
   0   9  22 276.995 35.3633   6
   0  -9 -22 324.107 40.5576   5
   0   9  23 2.40649 10.2154  12
   0   9  23 13.2285 14.0332  13
   0  -9  23-3.07308 11.5027  13
   0  -9 -23 9.60401 9.20190   1
   0  -9 -23 8.82627 17.2810   7
   0   9 -23-6.94549 14.4601   7
   0  -9 -23 21.3713 19.4300   5
   0   9  23 9.06094 13.2830   6
   0  -9  24-6.43831 13.1566  13
   0   9  24 22.6386 11.8152  12
   0  -9 -24 22.4572 19.7552   5
   0   9  24-6.27326 13.8051   6
   0   9 -24 25.9412 15.1407   7
   0  -9 -24 27.7657 19.6400   7
   0  -9 -24 2.49976 10.8192   1
   0  -9 -25 48.9795 21.7807   7
   0  -9 -25 72.7556 15.1420   1
   0  10   0 2845.01 225.687  11
   0 -10   0 2871.87 226.013  10
   0 -10   0 2563.72 228.019   7
   0 -10   0 3008.52 227.009   1
   0  10   0 3039.26 226.341   6
   0  10   0 2886.65 223.156   5
   0 -10  -1 12.2531 5.95048   1
   0 -10   1 3.53405 6.57402   1
   0  10  -1 19.5503 15.8163   7
   0 -10   1 2.85963 7.60887   7
   0  10   1 13.9675 7.73113   7
   0 -10  -1 9.22746 10.5773   7
   0  10   1 14.7533 3.89515   5
   0  10  -1 12.1498 2.94246   5
   0  10   1 7.75967 5.99093   6
   0  10  -1 7.66703 5.36991   6
   0  10   1 10.7735 5.49750  11
   0  10  -1 4.82497 5.11113  11
   0 -10   1 3.94197 5.69145  10
   0  10  -1 6.80064 5.66822   9
   0  10   1 15.5648 3.80901   3
   0 -10  -2 1607.11 125.213   1
   0 -10   2 1621.63 125.837   1
   0 -10  -2 1026.39 127.986   7
   0  10   2 1373.56 124.313   7
   0  10  -2 915.264 127.223   7
   0  10   2 1561.92 124.014  11
   0  10  -2 1578.74 124.654  11
   0  10   2 1427.92 122.554   5
   0  10  -2 1516.59 124.029   6
   0  10  -2 1557.50 121.191   5
   0  10   2 1506.25 125.326   6
   0 -10   2 1551.99 124.524  10
   0  10   2 1564.74 124.533   9
   0  10  -2 1596.82 124.622   9
   0  10   2 1631.63 121.657   3
   0 -10   3 2.60999 6.22213   1
   0 -10  -3 7.53504 5.28475   1
   0  10   3 9.84454 5.22074   7
   0 -10  -3 2.82244 14.5755   7
   0 -10   3 8.52402 5.84593  12
   0  10  -3 4.58598 1.91265   5
   0  10   3 5.00297 5.78700   6
   0  10   3 2.08267 4.02381   5
   0  10  -3 3.37758 4.68917   6
   0  10  -3-1.03551 5.74454  11
   0  10   3 2.49956 4.72622  11
   0  10   3 1.00043 5.11300   9
   0 -10   3 2.93581 4.74005  10
   0  10  -3 7.64388 4.94640   9
   0 -10  -3 15.7666 6.25702  10
   0  10   3 5.31819 2.22771   3
   0 -10  -4 3.20542 5.65235   1
   0 -10   4 1.40098 7.41128   1
   0 -10  -4 15.1003 13.4711   7
   0 -10   4 3.18673 5.34512  12
   0  10   4 1.32074 6.28633   6
   0 -10  -4 5.40295 4.83132   5
   0  10  -4-0.57098 2.23548   5
   0  10   4 0.80367 3.88116   5
   0  10  -4-1.66618 4.35443   6
   0  10   4-1.60097 4.66642  11
   0  10   4-7.06577 5.40303   9
   0 -10   4 5.87893 4.93040  10
   0  10  -4 1.89481 4.76730   9
   0  10   4 0.94895 2.20634   3
   0 -10  -5 112.475 13.9565   1
   0 -10   5 107.982 15.3631   1
   0 -10  -5 89.2286 17.9092   7
   0 -10   5 121.263 14.0149  12
   0  10   5 134.081 12.9931  11
   0  10   5 121.905 15.7107   6
   0  10  -5 109.345 10.9730   5
   0 -10  -5 99.2586 13.8684   5
   0  10  -5 107.517 13.8873  11
   0 -10   5 101.205 13.2587  10
   0  10   5 106.975 13.4673   9
   0  10  -5 144.702 14.0249   9
   0  10   5 122.068 10.9292   3
   0 -10   6 793.120 74.1279   1
   0 -10  -6 848.944 72.0752   1
   0 -10  -6 943.321 76.5406   7
   0 -10   6 840.429 72.2048  12
   0  10  -6 895.422 72.6423  11
   0  10   6 904.620 70.8677  11
   0  10  -6 829.205 69.7274   5
   0 -10  -6 790.106 72.4686   5
   0 -10   6 894.561 72.1165  10
   0  10  -6 795.495 71.2810   9
   0  10   6 861.276 71.9007   9
   0  10   6 818.303 69.2027   3
   0 -10  -6 881.422 69.0540   3
   0 -10  -7 414.707 34.9169   3
   0  10   7 410.645 35.3643   3
   0 -10   7 414.434 40.8511   1
   0 -10  -7 416.269 37.9337   1
   0  10   7 401.024 37.9171  12
   0 -10   7 396.874 38.1872  12
   0  10   7 460.730 36.6121  11
   0  10  -7 447.640 38.7722  11
   0  10  -7 405.293 36.2191   5
   0 -10  -7 409.522 39.0404   5
   0 -10   7 435.481 37.7638  10
   0  10  -7 397.373 37.2667   9
   0  10   7 464.723 38.2558   9
   0 -10  -7 434.452 41.8051   7
   0 -10  -8 104.182 9.89033   3
   0  10   8 104.486 10.4072   3
   0 -10   8 104.002 16.3629   1
   0 -10  -8 123.494 11.3495   2
   0 -10  -8 105.031 12.9720   1
   0  10   8 90.7482 12.5918  12
   0 -10   8 116.611 13.9082  12
   0  10   8 110.272 11.2340  11
   0 -10  -8 66.0916 12.6264   5
   0  10   8 101.676 14.8124   6
   0  10  -8 100.137 11.7673   5
   0 -10   8 122.602 13.0236  10
   0  10  -8 111.921 13.7992  11
   0  10  -8 106.201 12.2678   9
   0  10   8 98.7640 12.6901   9
   0 -10  -8 97.1726 15.7833   7
   0  10   9 239.855 23.2847   3
   0 -10  -9 243.949 22.7670   3
   0 -10  -9 270.403 23.6727   2
   0 -10  -9 277.443 26.0256   1
   0 -10   9 308.041 30.4705   1
   0  10   9 250.236 29.3458  13
   0  10   9 247.562 25.6843  12
   0  10   9 275.257 23.6294  11
   0 -10   9 299.882 27.1949  12
   0  10  -9 311.580 27.2012  11
   0  10   9 273.010 28.6084   6
   0  10  -9 256.813 25.0423   5
   0 -10  -9 233.092 27.4088   5
   0 -10   9 266.766 25.2837  10
   0  10   9 265.787 25.6110   9
   0  10  -9 262.304 24.8538   9
   0 -10  -9 281.823 29.4982   7
   0 -10 -10 294.730 28.7387   1
   0 -10 -10 296.134 26.4668   2
   0 -10  10 278.672 32.1151   1
   0  10  10 313.607 32.4838  13
   0 -10  10 296.537 29.5483  12
   0  10  10 291.844 28.8706  12
   0  10  10 314.899 26.1438  11
   0  10 -10 295.734 29.2852  11
   0 -10 -10 287.244 31.1843   5
   0  10  10 274.051 30.8828   6
   0  10 -10 273.538 28.1091   5
   0 -10  10 306.358 27.9916  10
   0  10 -10 310.697 27.7422   9
   0  10  10 316.809 28.5961   9
   0 -10 -10 248.250 31.3041   7
   0  10 -10 320.396 29.4137   7
   0 -10 -11 823.310 69.4721   2
   0 -10 -11 855.771 72.1285   1
   0  10  11 843.356 76.0586  13
   0 -10  11 822.048 73.1135  12
   0  10  11 786.416 71.9795  12
   0  10 -11 853.994 72.5012  11
   0 -10 -11 789.390 74.7115   5
   0  10  11 914.502 75.3335   6
   0  10 -11 832.709 72.0993   5
   0 -10  11 868.210 70.9802  10
   0  10 -11 858.381 70.5108   9
   0  10  11 874.172 71.5580   9
   0  10 -11 835.765 72.3887   7
   0 -10 -11 797.573 75.5228   7
   0 -10 -12 427.997 36.5680   2
   0 -10 -12 374.784 38.6566   1
   0  10  12 422.541 42.6437  13
   0 -10  12 476.357 41.0332  12
   0  10  12 360.481 38.4742  12
   0  10 -12 449.205 39.5035  11
   0  10  12 406.077 41.5315   6
   0 -10 -12 395.436 42.2027   5
   0  10 -12 396.780 39.5213   5
   0 -10  12 474.430 37.8949  10
   0  10  12 461.816 38.5993   9
   0  10 -12 416.244 37.0070   9
   0 -10 -12 423.485 43.2760   7
   0  10 -12 416.631 39.9132   7
   0 -10 -12 402.419 37.0424   8
   0 -10 -13 23.7509 7.84547   1
   0 -10 -13 28.3755 6.08451   2
   0  10  13 38.6675 8.83865  12
   0 -10  13 28.7649 9.51149  13
   0  10  13 38.3548 11.5416  13
   0 -10  13 24.9973 9.25988  12
   0  10 -13 17.2585 8.46012   5
   0 -10 -13 27.6106 12.2045   5
   0  10  13 8.06588 8.64684   6
   0  10 -13 33.0725 8.59744  11
   0 -10  13 31.7704 6.62235  10
   0  10  13 19.7498 6.84400   9
   0  10 -13 27.6341 6.16207   9
   0 -10 -13 31.6092 11.7584   7
   0  10 -13 15.8844 8.15660   7
   0 -10 -13 29.0694 6.19187   8
   0 -10 -14 554.604 54.6717   1
   0 -10  14 627.852 57.1956  13
   0  10  14 547.689 54.6907  12
   0 -10  14 626.163 56.6625  12
   0  10  14 642.373 59.1045  13
   0  10 -14 660.145 55.3324  11
   0  10  14 683.219 58.7038   6
   0 -10 -14 528.756 58.1026   5
   0  10 -14 650.678 56.6474   5
   0  10  14 569.087 53.2426   9
   0 -10 -14 641.425 52.4899   8
   0  10 -14 730.650 57.7839   7
   0 -10 -14 573.539 59.1112   7
   0 -10 -15 7.91608 7.40676   1
   0  10  15 19.3792 12.2471  13
   0  10  15 17.7073 8.18696  12
   0 -10  15 20.0985 9.63987  13
   0 -10  15 11.3186 7.94137  12
   0  10 -15 7.64054 9.43050   5
   0 -10 -15 10.6798 11.9962   5
   0  10  15 33.1080 10.5726   6
   0  10 -15 24.3479 8.43332  11
   0  10  15 17.5119 6.49023   9
   0  10 -15 7.59855 8.85197   7
   0 -10 -15 2.78697 12.3085   7
   0 -10 -16 453.793 44.5091   1
   0  10  16 500.145 48.8329  13
   0 -10  16 446.350 46.1568  13
   0 -10  16 467.133 45.8818  12
   0  10  16 456.481 44.6570  12
   0  10 -16 474.756 43.9410  11
   0  10  16 507.024 47.8423   6
   0 -10 -16 442.999 49.0467   5
   0  10 -16 452.400 46.3821   5
   0 -10 -16 560.756 45.1324   4
   0 -10 -16 409.787 48.9865   7
   0  10 -16 483.926 46.9139   7
   0 -10  17 9.08090 10.3177  13
   0  10  17-2.68508 10.0438  13
   0  10  17-7.21793 7.36473  12
   0 -10  17 6.35252 9.14613  12
   0 -10 -17 6.11349 11.9662   5
   0  10  17 2.40873 10.7692   6
   0  10 -17-4.52517 10.9263   5
   0  10 -17 2.93608 7.08934  11
   0 -10 -17-5.38417 8.02402   1
   0  10 -17 6.68410 10.7594   7
   0 -10 -17 6.32945 13.6694   7
   0  10  18-2.77608 10.8755  13
   0 -10  18-2.40244 9.61610  13
   0  10  18 11.4124 8.51410  12
   0  10  18-2.50391 10.8231   6
   0 -10 -18-3.26102 12.7727   5
   0 -10  18 4.46694 8.94109  12
   0  10 -18 8.87170 7.15255  11
   0  10 -18 7.32851 10.5595   7
   0 -10 -18-3.37677 14.5912   7
   0 -10 -18 17.2122 8.97745   1
   0 -10 -19 76.3423 18.4847   5
   0  10  19 39.3075 13.6601   6
   0 -10  19 76.4204 15.9641  13
   0  10  19 72.8035 17.0179  13
   0 -10  19 42.5004 13.6863  12
   0  10  19 32.2014 11.1078  12
   0  10 -19 36.8896 13.5609   7
   0 -10 -19 64.6342 19.3276   7
   0 -10 -19 26.2074 11.1245   1
   0 -10 -20 3.67804 15.3600   5
   0  10  20 13.7145 11.2648   6
   0 -10  20 24.8112 11.8757  12
   0 -10  20 8.05551 11.2464  13
   0  10  20 3.04857 11.7392  13
   0  10  20 21.1466 10.2888  12
   0 -10 -20 7.61821 15.9037   7
   0  10 -20 19.8700 13.3694   7
   0 -10 -20 33.9099 11.2815   1
   0 -10 -21-7.79238 15.9017   5
   0  10  21-5.74321 11.4833   6
   0  10  21-3.18748 12.2038  13
   0  10  21 17.7381 10.8594  12
   0 -10  21-8.50462 14.2646  13
   0 -10  21-2.61012 12.2392  12
   0 -10 -21 12.0820 16.7624   7
   0  10 -21-6.10424 12.4568   7
   0 -10 -21 2.22117 10.0948   1
   0 -10 -22 32.9424 18.7611   5
   0  10  22 38.8273 14.4632   6
   0 -10  22 56.4357 16.4832  13
   0  10  22 51.0522 13.8724  12
   0  10  22 33.2780 14.8205  13
   0 -10 -22 63.6868 21.1055   7
   0  10 -22 52.3663 17.0703   7
   0 -10 -22 44.0689 13.9947   1
   0  10  23 21.8625 13.9761   6
   0 -10 -23 43.3636 20.9491   5
   0  10  23 31.2280 16.5254  13
   0 -10  23 18.6170 14.1141  13
   0  10  23-2.42498 10.8580  12
   0  10 -23-24.5001 15.9178   7
   0 -10 -23-13.5432 18.7989   7
   0 -10 -23 24.1718 10.8231   1
   0 -10 -24 31.9412 19.3539   5
   0  10  24 19.4246 14.9489   6
   0 -10 -24 10.0453 10.8472   1
   0 -10  24-9.74387 14.7613  13
   0  10  24-12.6455 13.2188  12
   0  10 -24-3.73199 14.9238   7
   0 -10 -24 9.46531 18.9253   7
   0  11   0 2.64563 2.94816   5
   0  11   0 3.44784 5.14127   6
   0  11   0 3.81475 9.59914   7
   0 -11   0 8.03808 8.60674   7
   0  11   0 1.03416 5.40805  11
   0 -11   0 1.11127 5.59445  10
   0 -11   0-1.27113 5.77968   1
   0 -11  -1-3.75326 6.54405   1
   0 -11   1 3.95844 5.80577   1
   0  11  -1 3.10156 2.29284   5
   0  11   1 9.79134 6.70670   6
   0  11   1 3.39557 2.97416   5
   0  11  -1 9.62945 5.66582   6
   0 -11  -1 7.51687 9.82539   7
   0  11   1 2.60317 7.13170   7
   0  11  -1 2.76442 13.1601   7
   0  11  -1 3.20642 5.24088  11
   0  11   1-1.00046 5.60448  11
   0  11  -1 2.16157 5.44436   9
   0 -11   1 3.30499 5.09341  10
   0 -11  -1 7.88044 5.51959  10
   0  11   1 3.40758 3.18920   3
   0 -11   2 16.4457 7.59232   1
   0 -11  -2 4.93779 5.96777   1
   0  11   2 11.6375 6.42626   6
   0  11  -2 6.99091 5.47566   6
   0  11  -2 1.97772 1.91020   5
   0  11   2 1.78995 3.55651   5
   0 -11  -2-12.4330 12.9996   7
   0  11   2 7.62049 5.62703   7
   0  11   2 1.93501 4.54527  11
   0  11  -2-1.10440 5.91801  11
   0 -11   2 2.19082 5.14403  10
   0  11  -2 3.21696 4.72185   9
   0  11   2 1.10286 4.77168   9
   0  11   2 6.26899 2.56929   3
   0 -11  -3 63.4654 9.88634   1
   0 -11   3 34.5709 8.96126   1
   0 -11  -3 12.3178 14.9413   7
   0  11   3 33.9771 6.43940   5
   0  11   3 46.3159 9.68130   6
   0  11  -3 29.3127 6.86565   6
   0  11  -3 38.8407 4.38417   5
   0  11  -3 33.8795 3.79562   5
   0  11  -3 36.5065 8.41728  11
   0  11   3 33.6557 7.09527  11
   0  11  -3 52.1447 8.33868   9
   0  11   3 51.0442 8.41232   9
   0 -11  -3 44.2671 8.19675  10
   0 -11   3 29.5243 7.00330  10
   0  11   3 34.9247 4.57518   3
   0  11   4 1148.56 92.1326   3
   0  11   4 1156.37 94.6214  11
   0 -11   4 1173.70 95.8369  12
   0  11  -4 1141.69 91.7574   5
   0  11   4 1039.62 93.9754   5
   0  11   4 1169.89 97.0516   6
   0  11  -4 1073.68 94.4058   6
   0 -11  -4 1227.84 96.2365  10
   0 -11   4 1167.65 95.5514  10
   0  11   4 1155.50 95.6092   9
   0  11  -4 1139.75 95.2411   9
   0 -11   4 1151.56 97.2352   1
   0 -11  -4 1213.21 96.3334   1
   0 -11   5 115.199 16.4724   1
   0 -11  -5 102.405 14.0847   1
   0 -11   5 136.563 15.0406  12
   0  11   5 137.747 13.7542  11
   0  11   5 144.798 16.9931   6
   0 -11  -5 109.396 14.4695   5
   0  11  -5 117.185 11.1264   5
   0 -11   5 131.456 14.5016  10
   0  11  -5 92.2675 13.3961   9
   0  11   5 139.865 14.7549   9
   0  11   5 122.826 11.1119   3
   0 -11   6 417.552 43.0596   1
   0 -11  -6 501.694 41.9185   1
   0 -11  -6 436.441 46.4481   7
   0  11  -6 455.921 41.7889  11
   0 -11   6 470.769 41.6874  12
   0  11   6 487.123 40.1721  11
   0 -11  -6 484.227 42.3072   5
   0  11  -6 415.255 38.3111   5
   0  11   6 433.688 42.8484   6
   0 -11   6 499.974 41.5349  10
   0  11  -6 475.966 40.9233   9
   0  11   6 473.550 41.3965   9
   0  11   6 450.114 38.0943   3
   0 -11  -7 191.691 20.2027   1
   0 -11   7 181.105 22.4763   1
   0 -11  -7 185.087 24.0635   7
   0  11  -7 202.436 20.8740  11
   0  11   7 179.382 18.4401  11
   0 -11   7 232.891 21.4586  12
   0  11  -7 172.269 17.6856   5
   0 -11  -7 186.939 20.8883   5
   0 -11   7 216.526 20.2703  10
   0  11  -7 183.010 19.3979   9
   0  11   7 168.931 19.5133   9
   0  11   7 180.362 16.9850   3
   0 -11  -7 200.999 16.8878   3
   0  11   8-0.50062 2.83143   3
   0 -11   8 1.98017 9.14356   1
   0 -11  -8 1.21259 5.68612   1
   0  11   8 8.49804 6.10879  12
   0 -11   8-2.65946 6.14019  12
   0 -11  -8-3.12187 6.11070   5
   0  11  -8 1.52914 4.45711   5
   0  11   8-2.21668 4.13510  11
   0  11  -8 2.65236 5.41274  11
   0 -11   8 1.09411 4.64081  10
   0  11  -8-5.07962 5.56304   9
   0  11   8 1.16063 4.92294   9
   0 -11  -8-2.07932 9.45016   7
   0  11   9 207.326 18.8313   3
   0 -11   9 169.890 24.1882   1
   0 -11  -9 216.284 19.4823   2
   0 -11  -9 218.076 21.9550   1
   0  11   9 184.605 21.2412  12
   0  11  -9 256.049 23.3262  11
   0 -11   9 214.274 22.2456  12
   0  11   9 232.864 19.7519  11
   0 -11  -9 216.757 23.6582   5
   0  11  -9 190.828 20.1781   5
   0  11   9 202.278 24.0560   6
   0 -11   9 256.189 22.0577  10
   0  11  -9 225.197 20.9546   9
   0  11   9 223.857 21.7730   9
   0 -11  -9 224.617 26.0299   7
   0 -11 -10 7.55345 6.38730   1
   0 -11  10 8.99378 9.32704   1
   0 -11 -10 24.7558 5.07442   2
   0  11  10 12.9254 6.87811  12
   0  11  10 18.7456 10.2575  13
   0 -11  10 22.0841 7.87381  12
   0 -11 -10 1.84071 7.98348   5
   0  11  10 24.5683 8.88450   6
   0  11 -10 17.9782 6.32784   5
   0  11 -10 32.5048 8.07874   7
   0  11 -10 27.9447 8.15604  11
   0 -11  10 24.6376 6.92033  10
   0  11  10 23.0966 5.11366  11
   0  11 -10 25.5036 6.57049   9
   0  11  10 33.1813 7.55334   9
   0 -11 -10 30.2870 10.8702   7
   0 -11 -11 160.878 20.2225   1
   0 -11 -11 211.364 18.5356   2
   0 -11  11 197.277 25.1772   1
   0  11  11 168.722 20.5358  12
   0  11  11 166.859 24.1499  13
   0 -11  11 190.906 21.9436  12
   0  11 -11 219.034 22.2414  11
   0  11  11 210.124 24.0419   6
   0 -11 -11 155.977 22.9538   5
   0  11 -11 194.898 20.7677   5
   0 -11  11 201.872 20.2514  10
   0  11 -11 187.636 19.4498   9
   0 -11 -11 183.993 24.8230   7
   0  11 -11 221.576 21.8208   7
   0 -11 -12 208.374 19.3118   2
   0 -11  12 210.555 26.8434   1
   0 -11 -12 173.402 21.3220   1
   0  11  12 170.100 24.8566  13
   0  11  12 200.436 21.7623  12
   0 -11  12 209.650 23.0080  12
   0  11 -12 241.573 23.3321  11
   0  11  12 219.909 25.2156   6
   0  11 -12 185.982 21.7416   5
   0 -11 -12 188.322 24.6712   5
   0  11 -12 181.792 21.9759   7
   0 -11  12 198.518 20.5659  10
   0  11 -12 191.897 20.0475   9
   0  11  12 244.653 22.2034   9
   0 -11 -12 201.853 26.2803   7
   0 -11 -12 210.616 20.6289   8
   0 -11 -13 192.534 22.1865   1
   0  11  13 217.975 23.0372  12
   0  11  13 206.023 26.0747  13
   0  11 -13 224.382 23.4286  11
   0 -11  13 200.980 23.5195  12
   0 -11 -13 126.258 23.5063   5
   0  11  13 205.092 25.2031   6
   0  11 -13 197.660 22.9242   5
   0 -11  13 199.188 20.7462  10
   0  11 -13 196.608 20.0806   9
   0  11  13 231.360 22.0677   9
   0 -11 -13 171.074 25.8743   7
   0  11 -13 222.080 23.7127   7
   0 -11 -13 238.342 20.9894   8
   0 -11 -14 95.7850 14.7038   1
   0  11  14 101.542 14.8753  12
   0  11  14 88.9289 17.6631  13
   0 -11  14 98.3224 16.0456  13
   0 -11  14 111.945 16.5979  12
   0 -11 -14 98.2606 18.8258   5
   0  11 -14 84.8471 15.0350   5
   0  11  14 86.6321 16.7482   6
   0  11 -14 118.903 15.4989  11
   0  11  14 125.013 14.4271   9
   0  11 -14 110.896 16.7166   7
   0 -11 -14 111.322 19.8973   7
   0 -11 -15 227.691 26.6644   1
   0 -11  15 242.084 28.3928  13
   0  11  15 253.648 31.1926  13
   0  11  15 270.386 27.6094  12
   0 -11  15 261.243 28.4155  12
   0  11 -15 286.765 27.2479  11
   0  11  15 300.396 31.1614   6
   0 -11 -15 241.042 31.4581   5
   0  11  15 216.841 24.9038   9
   0  11 -15 243.190 28.3341   7
   0 -11 -15 273.984 32.9462   7
   0 -11 -16 12.0321 7.46976   1
   0 -11  16 19.6780 10.2854  13
   0  11  16 8.21614 11.6452  13
   0  11  16 15.6150 8.53706  12
   0 -11  16 10.2506 9.50212  12
   0 -11 -16 2.90342 12.7892   5
   0  11  16 4.81115 10.4229   6
   0  11 -16 3.14368 7.52646  11
   0 -11 -16 13.3883 8.57057   4
   0 -11 -16 6.16949 13.3493   7
   0  11 -16 14.6291 10.4091   7
   0  11  17 7.33351 7.79719  12
   0 -11  17 9.22699 9.43198  13
   0  11  17 2.87349 10.5052  13
   0 -11  17 15.1938 9.39264  12
   0 -11 -17-3.10419 13.6572   5
   0  11  17 7.52111 10.6488   6
   0  11 -17 12.7103 8.32374  11
   0 -11 -17-3.63498 7.72999   1
   0 -11 -17 19.5806 14.8426   7
   0  11 -17 11.2914 10.4433   7
   0 -11  18 26.8698 11.7396  13
   0  11  18 42.4419 11.7494  12
   0  11  18 26.5991 13.4617  13
   0 -11  18 22.8419 10.6954  12
   0  11 -18 49.6513 10.8500  11
   0 -11 -18 30.9116 9.41764   1
   0  11  18 47.0581 14.2282   6
   0 -11 -18 13.2442 14.7803   5
   0  11 -18 53.6340 15.1124   7
   0 -11 -18 10.4264 16.0035   7
   0 -11 -19 3.52300 14.1436   5
   0  11  19 21.8347 12.4674   6
   0 -11 -19 22.3924 10.3194   1
   0  11 -19 15.7529 11.6087   7
   0 -11 -19 3.69271 14.1934   7
   0  11  19 18.3364 9.63527  12
   0  11  19-3.09341 12.9361  13
   0 -11  19 24.1004 11.7056  12
   0 -11  19 28.4374 12.1869  13
   0  11  20 59.8617 16.2303   6
   0 -11 -20 52.2694 18.7777   5
   0 -11 -20 36.3491 12.4570   1
   0 -11 -20 35.2125 18.0317   7
   0  11 -20 48.7626 15.4663   7
   0  11  20 14.9619 10.8879  12
   0  11  20 32.3412 15.6816  13
   0 -11  20 30.3309 12.7359  12
   0 -11  20 67.9824 16.1318  13
   0 -11 -21 59.3251 22.1095   5
   0  11  21 118.236 20.9452   6
   0 -11 -21 96.2705 17.2929   1
   0 -11 -21 140.550 26.6376   7
   0  11 -21 120.175 22.4086   7
   0 -11  21 152.016 22.7142  13
   0  11  21 111.921 18.2303  12
   0  11  21 97.8603 20.7012  13
   0 -11  21 93.0078 19.1928  12
   0 -11 -22 12.5405 16.8141   5
   0  11  22 37.0694 16.2474   6
   0 -11 -22 25.8861 11.9795   1
   0  11 -22 19.8146 15.3566   7
   0 -11 -22-8.70865 19.5521   7
   0  11  22 63.3137 18.6955  13
   0 -11  22 13.8703 11.6878  12
   0 -11  22 54.0646 16.3639  13
   0  11  22 14.0396 11.6029  12
   0 -11 -23 44.0147 19.4465   5
   0  11  23 61.3020 18.8839   6
   0 -11 -23 44.0968 13.8813   1
   0 -11 -23 59.4685 23.3788   7
   0  11 -23 45.8698 17.5236   7
   0 -11  23 56.4515 17.6535  13
   0  11  23 68.3515 14.6719  12
   0  11  23 54.9178 18.8713  13
   0 -11  23 37.5412 14.7232  12
   0  11  24 10.0252 13.0819   6
   0 -11 -24-7.62710 11.5545   1
   0 -11 -24 4.79235 19.1640   7
   0  11 -24 30.0781 17.3607   7
   0  11  24-5.08480 11.3668  12
   0  11  25-3.47935 14.2031   6
   0 -12   0 50.0141 13.1691   7
   0  12   0 75.7579 11.1038   6
   0  12   0 58.1933 7.05769   5
   0  12   0 83.1791 10.9751  11
   0 -12   0 87.4220 11.4360  10
   0 -12   0 81.8941 12.0135   1
   0 -12   1 206.931 22.0733   1
   0 -12  -1 187.988 21.5129   1
   0 -12  -1 158.351 23.8217   7
   0  12  -1 194.993 20.7848  11
   0  12   1 198.942 20.5400  11
   0 -12  -1 195.666 20.7792  10
   0 -12   1 225.882 21.4014  10
   0  12   1 225.068 18.2601   3
   0  12  -1 184.747 20.6904   9
   0  12  -1 180.598 20.5822   6
   0  12  -1 196.640 16.8442   5
   0  12   1 225.110 21.9118   6
   0  12   1 179.167 17.7479   5
   0 -12   2 52.5693 10.5016   1
   0 -12  -2 40.0078 9.37389   1
   0  12  -2 57.5655 8.76520   6
   0  12   2 43.2494 6.70208   5
   0  12   2 66.4219 10.8653   6
   0 -12  -2 41.3839 15.6397   7
   0  12  -2 66.5932 10.2690  11
   0  12   2 53.5597 9.01876  11
   0 -12   2 47.3341 8.96467  10
   0  12   2 55.8092 9.23152   9
   0  12  -2 46.1799 8.99899   9
   0  12   2 46.7696 5.89506   3
   0 -12   3 18.9297 7.35053   1
   0 -12  -3 21.9065 7.91108   1
   0 -12  -3 22.0595 16.1461   7
   0  12  -3 10.5025 5.65948   6
   0  12   3 41.5442 9.36515   6
   0  12   3 27.8776 5.40247   5
   0  12   3 23.8765 6.81415  11
   0  12  -3 13.7280 6.48589  11
   0  12  -3 17.6505 6.50402   9
   0 -12   3 32.7027 7.70230  10
   0  12   3 21.9875 7.23477   9
   0  12   3 17.9587 3.44247   3
   0 -12   4 153.048 19.1025   1
   0 -12  -4 153.902 17.9160   1
   0 -12  -4 71.8870 23.6361   7
   0  12   4 167.717 16.9095  11
   0 -12   4 171.692 18.3250  12
   0  12  -4 149.041 12.9870   5
   0  12   4 163.490 19.1093   6
   0  12  -4 148.428 16.5722   6
   0 -12   4 171.851 17.7836  10
   0  12  -4 150.404 17.8731  11
   0  12   4 155.013 17.6314   9
   0 -12  -4 169.929 18.2259  10
   0  12  -4 147.239 17.1402   9
   0  12   4 147.790 13.6484   3
   0 -12   5 95.5628 16.0951   1
   0 -12  -5 130.948 15.8106   1
   0 -12   5 117.733 15.1057  12
   0  12  -5 111.555 11.0091   5
   0  12   5 123.352 16.5729   6
   0 -12   5 135.702 15.2314  10
   0  12   5 149.167 14.6294  11
   0  12   5 123.974 15.0424   9
   0 -12  -5 126.502 15.8623  10
   0  12  -5 114.855 14.5085   9
   0  12   5 132.901 11.5020   3
   0 -12   6 788.618 71.4071   1
   0 -12  -6 876.270 69.7584   1
   0 -12   6 794.868 69.2275  12
   0  12   6 872.204 68.0052  11
   0  12  -6 836.197 69.5603  11
   0  12  -6 760.527 65.3408   5
   0  12   6 851.562 71.2472   6
   0 -12  -6 839.761 69.9847   5
   0 -12  -6 861.586 69.9480  10
   0 -12   6 895.169 69.3623  10
   0  12  -6 864.012 68.8426   9
   0  12   6 813.854 68.9613   9
   0  12   6 785.738 65.2757   3
   0 -12  -7-1.33725 5.88256   1
   0 -12   7 7.98448 9.21988   1
   0 -12  -7 13.3118 13.3984   7
   0 -12   7 2.74092 6.13134  12
   0  12  -7-2.31909 3.90908   5
   0 -12  -7-1.52456 6.34952   5
   0  12  -7 2.80019 7.23158  11
   0 -12   7 3.64395 5.95319  10
   0  12   7 9.75436 4.80671  11
   0  12   7 20.1802 7.35578   9
   0  12  -7-2.27908 5.88728   9
   0  12   7 5.34410 3.19789   3
   0 -12  -8-1.33451 6.53628   1
   0 -12   8-2.10837 7.69683   1
   0 -12  -8 2.44568 11.2932   7
   0 -12   8 5.69713 6.87834  12
   0 -12  -8 4.88890 6.65144   5
   0  12  -8-1.44049 4.66692   5
   0  12   8-4.19202 4.54006  11
   0 -12   8-3.63213 5.22985  10
   0  12  -8 4.31285 6.74148  11
   0  12  -8-2.25347 5.20315   9
   0  12   8-1.27332 5.69328   9
   0  12   8-0.48656 2.83712   3
   0 -12  -9 8.00890 6.89870   1
   0 -12  -9 3.89952 3.93776   2
   0 -12   9 2.25329 10.0794   1
   0  12   9 10.7895 6.70434  12
   0 -12   9 5.96729 6.67768  12
   0 -12  -9 10.5488 7.60085   5
   0  12   9 4.70272 4.53559  11
   0 -12   9-2.40095 6.04930  10
   0  12  -9 5.89835 7.12836  11
   0  12  -9 4.44709 5.67668   9
   0  12   9 2.57070 5.85067   9
   0 -12  -9-2.37922 11.4941   7
   0 -12  10 30.9142 12.1228   1
   0 -12 -10 23.0551 7.43945   1
   0 -12 -10 39.4546 6.62063   2
   0  12  10 42.7914 9.08056  12
   0 -12  10 35.8774 9.49928  12
   0  12  10 50.0687 11.5395   6
   0 -12 -10 58.7675 12.2973   5
   0 -12  10 32.0106 8.04245  10
   0  12  10 38.9089 6.82944  11
   0  12 -10 28.7140 8.97754  11
   0  12  10 25.9800 7.77139   9
   0  12 -10 37.0988 7.74007   9
   0 -12 -10 16.7233 11.6983   7
   0 -12  11 431.016 43.0469   1
   0 -12 -11 422.521 35.2533   2
   0 -12 -11 437.824 38.3065   1
   0  12  11 437.139 38.3894  12
   0 -12  11 402.239 38.8236  12
   0  12 -11 411.353 38.6014  11
   0 -12 -11 420.053 41.0297   5
   0  12  11 453.386 41.7036   6
   0 -12  11 470.219 37.6832  10
   0  12  11 440.290 38.0819   9
   0  12 -11 449.949 37.0179   9
   0  12 -11 467.462 38.6572   7
   0 -12 -11 327.850 40.8673   7
   0 -12  12-5.26876 11.1736   1
   0 -12 -12-1.43812 6.32169   1
   0  12  12 2.71553 10.8591  13
   0  12  12-4.40685 7.09380  12
   0 -12  12 3.43375 8.05066  12
   0  12  12 12.9912 9.35215   6
   0  12 -12-1.51341 6.98826   7
   0 -12 -12 13.2686 10.9802   5
   0  12 -12-1.58058 7.06666  11
   0 -12  12-2.27625 5.72694  10
   0  12 -12 5.18666 4.93742   9
   0  12  12 2.64157 5.90516   9
   0 -12 -12-5.10283 11.9639   7
   0 -12 -13 373.122 38.4182   1
   0 -12  13 431.156 44.6524   1
   0  12  13 355.543 42.7979  13
   0 -12  13 437.115 40.4418  12
   0  12  13 367.492 38.4505  12
   0  12 -13 433.879 39.7203  11
   0 -12 -13 377.136 41.9471   5
   0  12  13 412.861 42.1115   6
   0 -12  13 413.764 37.3667  10
   0  12  13 380.919 37.7765   9
   0  12 -13 398.813 36.6945   9
   0 -12 -13 388.828 43.3652   7
   0 -12 -13 453.780 37.6924   8
   0  12 -13 480.631 40.6847   7
   0 -12 -14-1.57264 6.93065   1
   0 -12  14 14.3629 9.63409  13
   0  12  14 3.20296 7.41145  12
   0  12  14 2.80304 10.9842  13
   0 -12  14 7.61567 8.66708  12
   0 -12 -14-7.70438 10.2816   5
   0  12  14 4.68551 9.18453   6
   0  12 -14 8.21389 7.83469  11
   0  12  14 13.3039 7.30166   9
   0  12 -14 12.5614 9.27732   7
   0 -12 -14 16.9878 12.6681   7
   0 -12 -15 107.835 16.7270   1
   0  12  15 101.033 15.9721  12
   0 -12  15 109.284 18.3042  13
   0  12  15 158.278 23.7866  13
   0 -12  15 178.044 20.7297  12
   0 -12 -15 129.541 20.9903   5
   0  12  15 121.531 20.1838   6
   0  12 -15 120.233 16.7992  11
   0  12  15 136.900 16.3067   9
   0  12 -15 137.897 19.2450   7
   0 -12 -15 101.836 21.3319   7
   0  12  16 418.733 42.4056  12
   0  12  16 474.764 48.1089  13
   0 -12  16 394.948 43.5439  12
   0 -12  16 501.730 45.6232  13
   0  12 -16 431.754 42.2253  11
   0 -12 -16 460.640 47.8577   5
   0  12  16 494.674 47.0138   6
   0 -12 -16 446.835 42.9014   1
   0 -12 -16 398.735 47.5971   7
   0  12 -16 425.876 43.7768   7
   0  12  17 3.12480 11.4193  13
   0 -12  17 14.1807 10.9262  13
   0  12  17 20.5701 9.66860  12
   0 -12  17 11.1518 10.3124  12
   0  12  17-2.62177 11.1328   6
   0 -12 -17-3.15673 12.8946   5
   0  12 -17 15.4106 8.85571  11
   0 -12 -17 7.39781 8.68852   1
   0  12 -17 2.29117 10.9180   7
   0 -12 -17-10.1159 14.3119   7
   0  12  18 129.452 20.4170  12
   0 -12  18 147.074 22.1756  13
   0  12  18 187.902 26.7337  13
   0 -12  18 149.779 22.1950  12
   0  12  18 166.377 24.5291   6
   0 -12 -18 181.736 27.5086   5
   0  12 -18 179.473 20.6499  11
   0 -12 -18 156.714 21.2605   1
   0  12 -18 190.188 24.4855   7
   0 -12 -18 132.564 27.0846   7
   0  12  19 22.6306 10.5515  12
   0  12  19 23.2865 15.4959  13
   0 -12  19 26.2997 12.6831  13
   0  12  19 25.5594 14.0579   6
   0 -12 -19 17.9033 15.8715   5
   0 -12  19 29.5825 11.9097  12
   0  12 -19 32.9744 10.8884  11
   0 -12 -19 41.7887 17.9304   7
   0  12 -19 7.97514 12.0594   7
   0 -12 -19 32.9684 11.8303   1
   0 -12 -20-11.3840 17.5295   5
   0  12  20 2.96019 11.8488   6
   0 -12  20 10.3221 10.3323  12
   0  12  20 8.66021 10.4682  12
   0  12  20-3.47020 14.1726  13
   0 -12  20 5.52497 11.7285  13
   0  12 -20 8.56613 11.4301   7
   0 -12 -20 8.04048 15.0471   7
   0 -12 -20 21.6182 10.6005   1
   0 -12 -21 16.0740 17.4552   5
   0  12  21 15.3232 14.7032   6
   0 -12  21 14.5433 13.3478  13
   0 -12  21 18.9683 11.8493  12
   0  12  21 42.3875 18.1008  13
   0  12  21 27.1620 10.6139  12
   0 -12 -21 29.6845 15.5903   7
   0  12 -21 21.4385 14.4795   7
   0 -12 -21 29.3952 11.2275   1
   0 -12 -22 12.7403 16.7628   5
   0  12  22 22.3730 15.3631   6
   0  12  22 22.0552 16.3001  13
   0  12  22 30.7162 12.0813  12
   0 -12  22 28.2504 13.2201  12
   0 -12  22 45.6260 16.2334  13
   0 -12 -22 31.2429 19.3973   7
   0  12 -22 19.6736 15.0559   7
   0 -12 -22 28.4842 12.4408   1
   0  12  23 49.9913 16.5253   6
   0 -12 -23 53.6435 21.1199   5
   0  12  23 34.4689 12.4940  12
   0 -12  23 22.2181 15.7578  13
   0 -12 -23 44.4268 13.3092   1
   0  12 -23 17.7974 15.5895   7
   0 -12 -23 4.68584 17.7168   7
   0 -12 -24 4.90449 16.9865   7
   0  12  24-6.89729 12.5914   6
   0  13   0 9.64741 6.65555   6
   0 -13   0-1.83561 8.73683   7
   0  13   0 1.24597 5.66277  11
   0  13   0-1.31331 6.60839   9
   0 -13   0-4.06551 6.25758  10
   0 -13   0-4.67923 6.61564   1
   0 -13  -1 81.5588 12.5934   1
   0 -13   1 70.4048 11.9190   1
   0  13   1 56.8473 10.9312   6
   0  13  -1 62.2607 10.7582   6
   0 -13  -1 65.7651 15.1597   7
   0  13   1 62.9860 10.1147  11
   0  13  -1 49.9895 9.91502  11
   0 -13   1 61.7902 10.6687  10
   0 -13  -1 52.0773 10.7195  10
   0  13  -1 60.0843 10.3329   9
   0  13   1 77.7901 7.98703   3
   0 -13  -2 106.965 14.3461   1
   0 -13   2 93.2257 14.2658   1
   0 -13  -2 59.8061 16.1230   7
   0  13   2 87.5041 13.2610   6
   0  13  -2 80.5109 11.8932   6
   0  13   2 87.1064 12.3576  11
   0  13  -2 100.224 13.2866  11
   0  13   2 80.9898 12.5346   9
   0  13  -2 87.0615 12.5344   9
   0 -13   2 92.1169 12.9995  10
   0  13   2 93.9883 9.24239   3
   0 -13   3 449.763 43.0684   1
   0 -13  -3 522.893 43.1921   1
   0 -13   3 437.447 41.9576  12
   0  13  -3 465.317 41.8121  11
   0  13   3 548.743 41.5932  11
   0  13  -3 453.092 40.8115   6
   0  13   3 493.577 43.3780   6
   0 -13   3 479.636 41.8794  10
   0  13  -3 458.241 41.3924   9
   0  13   3 480.902 41.9097   9
   0  13   3 408.958 37.2205   3
   0 -13   4 200.685 23.7776   1
   0 -13  -4 239.785 23.3887   1
   0  13  -4 199.551 22.1081  11
   0 -13   4 182.183 21.6595  12
   0  13   4 214.013 21.2648  11
   0  13   4 196.864 23.1299   6
   0  13  -4 212.699 21.0665   6
   0 -13   4 176.952 21.2619  10
   0 -13  -4 227.458 22.8294  10
   0  13   4 189.574 21.5290   9
   0  13  -4 221.960 21.8557   9
   0  13   4 203.460 17.6345   3
   0 -13   5 45.3944 12.3278   1
   0 -13  -5 66.2911 11.7285   1
   0 -13  -5 56.8772 21.5761   7
   0 -13   5 65.9472 11.1365  12
   0  13   5 75.2294 13.0551   6
   0  13   5 77.2068 10.5931  11
   0 -13   5 71.8881 11.5877  10
   0  13   5 71.7588 11.2701   9
   0 -13  -5 61.0538 10.9532  10
   0  13  -5 56.1218 10.2357   9
   0  13   5 60.8211 6.92474   3
   0  13   6 535.224 46.6865  11
   0 -13   6 580.812 48.8292  12
   0  13   6 589.579 51.0706   6
   0 -13   6 624.195 48.7495  10
   0 -13  -6 514.193 48.4269  10
   0  13   6 570.239 48.3475   9
   0  13  -6 569.372 47.9810   9
   0 -13   6 474.082 50.1231   1
   0 -13  -6 612.976 49.4129   1
   0 -13  -7 3.35759 14.5205   7
   0 -13   7 5.88445 6.72515  12
   0 -13  -7 8.20012 7.12079   5
   0  13   7 15.1390 9.42389   6
   0  13  -7 6.05132 6.91367  11
   0  13   7 11.8730 6.29782  11
   0 -13   7 2.66597 6.00362  10
   0  13   7 8.25462 6.96054   9
   0  13  -7 7.52089 6.09652   9
   0 -13  -7 18.0059 7.28228  10
   0 -13  -7 11.8249 7.94500   1
   0 -13   7 19.1324 10.7213   1
   0 -13  -8 74.9280 19.7653   7
   0 -13   8 110.101 15.1846  12
   0 -13  -8 115.390 16.1023   5
   0  13  -8 117.925 15.8962  11
   0  13   8 113.622 13.3471  11
   0 -13   8 106.328 14.4945  10
   0  13  -8 124.060 14.7608   9
   0 -13  -8 129.595 16.0485  10
   0  13   8 104.107 14.7680   9
   0 -13   8 97.4836 18.0555   1
   0 -13  -8 122.660 15.5829   1
   0 -13  -9 532.323 50.7676   7
   0 -13   9 470.144 44.2312  12
   0  13   9 479.807 41.3444  11
   0  13  -9 469.121 44.3038  11
   0 -13  -9 405.574 44.1630   5
   0 -13   9 505.382 43.3754  10
   0 -13  -9 501.122 44.4189  10
   0  13  -9 465.600 42.6264   9
   0  13   9 474.995 43.5021   9
   0 -13  -9 436.284 43.2605   1
   0 -13   9 441.719 47.1631   1
   0 -13 -10 71.9440 11.1748   1
   0 -13 -10 57.1902 8.43614   2
   0 -13  10 55.2764 15.4515   1
   0  13  10 56.3806 10.4640  12
   0 -13  10 44.6471 10.9648  12
   0  13  10 55.4438 14.0991   6
   0 -13 -10 54.9260 12.3833   5
   0 -13  10 59.9896 10.6275  10
   0  13 -10 34.1724 10.4882  11
   0  13  10 67.8758 11.5443   9
   0  13 -10 62.6080 10.2006   9
   0 -13 -10 59.6824 16.2850   7
   0 -13 -11 80.1970 13.3922   1
   0 -13  11 63.3834 17.2856   1
   0  13  11 108.729 14.6714  12
   0 -13  11 115.561 15.8142  12
   0  13 -11 102.957 14.5482   7
   0 -13 -11 94.8842 16.9387   5
   0  13  11 108.014 16.8874   6
   0  13 -11 108.134 15.4535  11
   0 -13  11 101.152 13.8482  10
   0  13 -11 106.199 13.1572   9
   0  13  11 117.022 15.1226   9
   0 -13 -11 70.4030 17.3542   7
   0 -13  12 72.0062 16.7784   1
   0 -13 -12 68.7105 11.5208   1
   0  13  12 52.6693 10.6592  12
   0 -13  12 68.5467 12.2868  12
   0  13  12 91.7864 16.1074   6
   0  13 -12 69.7985 12.1458   7
   0 -13 -12 61.3023 14.2451   5
   0  13 -12 73.0367 12.8473  11
   0 -13  12 81.3942 11.3356  10
   0  13  12 61.8121 11.1420   9
   0  13 -12 65.5600 10.0983   9
   0 -13 -12 55.5077 16.6583   7
   0 -13 -13 23.6347 8.59900   1
   0 -13  13 20.2895 13.4649   1
   0  13  13 6.10491 10.9326  13
   0  13  13 35.1736 9.18789  12
   0 -13  13 37.7720 10.9304  12
   0 -13 -13 46.3462 13.3510   5
   0  13  13 26.0941 11.6300   6
   0  13 -13 53.6687 11.3014   7
   0  13 -13 46.7674 10.2825  11
   0 -13  13 43.9261 9.01013  10
   0  13 -13 40.0045 8.13587   9
   0  13  13 47.7182 9.84575   9
   0 -13 -13 25.9078 14.1782   7
   0 -13 -13 30.8249 8.64997   8
   0 -13  14 39.3683 17.0474   1
   0 -13 -14 42.6233 10.8835   1
   0  13  14 69.7211 11.8011  12
   0  13  14 24.8817 13.9921  13
   0 -13  14 75.3015 14.1305  12
   0 -13 -14 47.1299 15.5246   5
   0  13  14 68.6993 15.0438   6
   0  13 -14 91.6897 14.0655  11
   0  13  14 63.8491 11.5150   9
   0 -13 -14 66.1567 17.6341   7
   0  13 -14 58.5554 12.6522   7
   0 -13  15 129.379 23.4482   1
   0 -13 -15 114.977 16.9777   1
   0  13  15 106.820 21.9769  13
   0  13  15 123.076 17.0363  12
   0 -13  15 111.550 19.0779  13
   0 -13  15 108.353 17.7421  12
   0  13  15 122.714 20.6723   6
   0 -13 -15 89.9382 20.3244   5
   0  13 -15 136.221 17.9778  11
   0  13  15 156.787 17.1941   9
   0 -13 -15 116.822 22.2978   7
   0  13 -15 118.662 18.1432   7
   0 -13 -16 8.97146 8.15534   1
   0  13  16-3.28340 12.8539  13
   0  13  16-5.44697 8.25243  12
   0 -13  16 9.30784 10.4041  13
   0 -13  16 4.36334 9.59062  12
   0 -13 -16 3.00833 13.6726   5
   0  13  16 13.2372 11.4355   6
   0  13 -16-9.08231 8.89693  11
   0 -13 -16 7.03354 7.73010  10
   0  13 -16 2.13355 8.53243   7
   0 -13 -16-3.32342 12.1325   7
   0 -13 -17-1.89237 8.03193   1
   0  13  17-3.33278 14.1389  13
   0 -13  17 7.29375 10.3163  13
   0  13  17 7.58690 8.48526  12
   0 -13  17 2.29632 9.56231  12
   0  13  17 2.74374 12.4733   6
   0 -13 -17 3.21327 12.0233   5
   0  13 -17 7.34640 8.07870  11
   0 -13 -17 9.02934 7.80574  10
   0 -13 -17-3.51923 17.7106   7
   0  13 -17 2.32558 9.86832   7
   0  13  18 17.3758 13.6440  13
   0 -13  18 30.6450 13.0596  13
   0  13  18 7.98119 8.36995  12
   0 -13  18 9.61681 10.0609  12
   0 -13 -18 10.2575 14.8051   5
   0  13  18 25.6262 13.3922   6
   0  13 -18 3.70292 8.47885  11
   0 -13 -18 13.9020 9.50991   1
   0  13 -18 30.0616 13.4495   7
   0 -13 -18 3.70367 15.1518   7
   0  13  19 52.1925 12.9129  12
   0  13  19 43.4593 17.2711  13
   0 -13  19 80.5741 16.6787  13
   0  13  19 44.0502 15.7634   6
   0 -13 -19 54.5414 18.5628   5
   0  13 -19 55.8712 12.4494  11
   0 -13  19 40.4302 13.1071  12
   0 -13 -19 69.1596 14.2480   1
   0  13 -19 78.0839 17.1458   7
   0 -13 -19 27.4203 18.3188   7
   0  13  20 18.3503 15.8922  13
   0 -13  20 16.8791 11.7633  13
   0  13  20 10.9719 9.71186  12
   0  13  20 9.16063 13.2374   6
   0 -13 -20 57.8928 18.6722   5
   0 -13  20 7.92048 11.6603  12
   0  13 -20 34.6636 15.1401   7
   0 -13 -20 20.6788 18.2148   7
   0 -13 -20 2.19490 8.84954   1
   0  13  21-6.35544 12.9749   6
   0 -13 -21 8.17310 15.6505   5
   0 -13  21 16.5973 12.7786  12
   0  13  21-2.29149 10.0800  12
   0  13  21 19.0890 15.8948  13
   0 -13  21-8.86715 12.5423  13
   0  13 -21 21.6659 13.3741   7
   0 -13 -21 4.35618 17.0573   7
   0 -13 -21 9.17155 10.2583   1
   0  13  22 59.5463 18.6982   6
   0 -13 -22 56.1436 21.6536   5
   0 -13  22 49.4097 16.6029  13
   0 -13  22 69.1705 18.2052  12
   0  13  22 85.9985 15.5571  12
   0  13  22 23.7872 17.4428  13
   0 -13 -22 27.4706 20.3117   7
   0  13 -22 89.4309 19.6720   7
   0 -13 -22 57.6677 14.4910   1
   0 -13 -23 36.3509 18.5621   5
   0  13  23-10.2585 15.8097   6
   0 -13 -23 27.4515 11.9047   1
   0  13  23 2.48621 11.1440  12
   0  13 -23 3.53348 13.8553   7
   0 -13 -23 33.5917 19.6018   7
   0 -14   0 3.42880 7.43557   1
   0  14   0 5.98237 6.72048   6
   0 -14   0 15.6145 10.3471   7
   0  14   0 9.48018 6.66703  11
   0 -14   0 4.44677 7.08709  10
   0  14   0 4.29072 6.53497   9
   0  14   0 13.6187 4.66376   3
   0 -14   1 124.906 15.6390   1
   0 -14  -1 84.5274 14.0248   1
   0  14  -1 73.4650 12.6670   6
   0  14   1 99.4079 14.0020   6
   0 -14  -1 49.5635 14.9469   7
   0  14  -1 87.6139 13.0844  11
   0  14   1 83.1057 12.5657  11
   0 -14  -1 92.9178 13.6474  10
   0  14  -1 95.4127 13.5588   9
   0 -14   1 102.869 13.9271  10
   0  14   1 91.6684 9.69114   3
   0 -14   2 19.7997 9.60653   1
   0 -14  -2 23.7303 8.95020   1
   0 -14  -2-2.37239 12.4648   7
   0  14  -2 24.0022 7.41164   6
   0  14   2 19.8904 8.86023   6
   0  14  -2 8.57008 7.20521  11
   0  14   2 26.9754 7.87954  11
   0  14  -2 15.5790 7.14619   9
   0 -14   2 10.2238 7.06712  10
   0  14   2 30.3306 8.59620   9
   0  14   2 13.6787 3.64617   3
   0 -14  -3 172.121 28.0679   7
   0 -14   3 170.477 20.8368  12
   0  14   3 209.821 22.4338   6
   0  14  -3 194.406 20.3452   6
   0  14   3 166.259 19.8215  11
   0  14  -3 193.664 21.3342  11
   0  14  -3 183.168 20.7291   9
   0  14   3 182.986 21.0864   9
   0 -14   3 183.412 20.7409  10
   0 -14  -3 192.225 21.9924   1
   0 -14   3 178.414 22.2155   1
   0 -14  -4 3.74185 16.1818   7
   0 -14   4 4.50894 6.98583  12
   0  14   4 16.2003 8.72915   6
   0  14  -4 13.5452 6.32768   6
   0  14  -4 10.5455 7.81824  11
   0  14   4 6.07606 6.40153  11
   0 -14   4 11.6327 7.45527  10
   0 -14  -4 10.9146 7.24393  10
   0  14   4 17.5300 7.19903   9
   0  14  -4 9.81059 7.27931   9
   0 -14   4 13.6822 9.33734   1
   0 -14  -4 1.68365 7.44388   1
   0 -14   5 1065.87 93.9418  12
   0  14   5 1123.68 92.8554  11
   0  14   5 1204.00 96.5361   6
   0 -14  -5 1205.84 95.0556  10
   0 -14   5 1170.59 94.2572  10
   0  14   5 1125.37 93.9790   9
   0  14  -5 1110.20 93.6880   9
   0 -14  -5 1192.80 95.4029   1
   0 -14   5 1068.04 96.2972   1
   0 -14   6 987.434 84.7446  12
   0  14   6 1071.57 83.4986  11
   0  14   6 1093.42 87.4816   6
   0 -14   6 1088.80 84.9650  10
   0 -14  -6 1082.29 85.7350  10
   0  14   6 982.397 84.4298   9
   0  14  -6 887.473 83.4554   9
   0 -14  -6 1017.72 85.6485   1
   0 -14   6 1014.81 87.7225   1
   0 -14  -7 16.7003 17.0467   7
   0 -14   7 7.90049 7.64578  12
   0  14   7-2.02331 8.10543   6
   0  14   7 3.28208 5.45353  11
   0  14  -7 6.51098 7.64799  11
   0 -14   7 13.0923 7.71059  10
   0 -14  -7 11.3765 8.08394  10
   0  14  -7 9.59588 6.44620   9
   0  14   7-2.98287 6.79551   9
   0 -14   7 6.85406 9.33712   1
   0 -14  -7 9.77162 7.53564   1
   0 -14  -8 63.5399 23.0372   7
   0  14   8 175.072 16.8052  11
   0 -14   8 128.873 17.9433  12
   0  14   8 128.144 19.8030   6
   0 -14  -8 151.711 19.3520   5
   0 -14   8 137.748 17.6402  10
   0  14  -8 141.819 18.5409  11
   0  14  -8 191.449 18.7831   9
   0 -14  -8 133.472 18.0515  10
   0  14   8 156.557 18.0763   9
   0 -14   8 112.895 20.3702   1
   0 -14  -8 152.325 18.4707   1
   0 -14  -9 23.9466 15.9004   7
   0 -14   9 6.75465 7.88677  12
   0 -14  -9 15.4801 8.25626   5
   0  14  -9 29.0300 9.62691  11
   0  14   9 20.6172 6.36795  11
   0 -14   9 21.6106 8.00956  10
   0  14  -9 24.1492 7.32612   9
   0 -14  -9 36.7267 9.80539  10
   0  14   9 22.7811 8.32983   9
   0 -14  -9 30.2814 8.42608   1
   0 -14   9 45.4210 13.7832   1
   0 -14 -10 147.401 25.2468   7
   0 -14  10 133.685 19.0616  12
   0 -14 -10 135.458 20.4220   5
   0 -14  10 163.806 18.7523  10
   0  14 -10 183.337 20.4707  11
   0  14 -10 172.889 18.4961   9
   0 -14 -10 140.366 18.8769  10
   0  14  10 147.096 18.7431   9
   0 -14  10 144.660 22.8596   1
   0 -14 -10 145.183 18.6636   1
   0 -14 -11 21.6319 16.0045   7
   0 -14  11 25.5897 8.53593  12
   0 -14 -11 19.6583 10.3214   5
   0  14 -11 20.5792 8.98946   7
   0  14  11-2.33763 12.1353   6
   0  14 -11 16.0588 9.06850  11
   0 -14  11 5.60405 6.49389  10
   0  14  11 17.0080 7.67934   9
   0  14 -11 19.4273 7.80153   9
   0 -14 -11 13.7110 8.01602  10
   0 -14  11 33.6749 14.7227   1
   0 -14 -11 22.4010 7.72187   1
   0 -14 -12 1.62169 7.60518   1
   0 -14  12 11.6491 14.0641   1
   0  14  12 1.64634 6.98390  12
   0 -14  12-3.79150 8.61660  12
   0  14  12 2.41187 9.64550   6
   0  14 -12 15.7821 7.94215   7
   0 -14 -12 2.33714 9.34670   5
   0  14 -12 5.45590 7.85609  11
   0 -14  12 5.48247 6.23029  10
   0  14  12-9.34873 7.41702   9
   0  14 -12 3.79210 5.74598   9
   0 -14 -12-3.48010 6.95927  10
   0 -14 -12 6.13247 13.4789   7
   0 -14  13 27.3813 14.6436   1
   0 -14 -13 29.8641 9.27973   1
   0  14  13 31.9721 9.78861  12
   0 -14  13 37.5724 11.5488  12
   0  14 -13 32.5816 10.5281   7
   0  14  13 27.5534 12.8684   6
   0 -14 -13 60.1403 13.8138   5
   0  14 -13 46.3494 11.8936  11
   0 -14  13 65.4135 10.7429  10
   0 -14 -13 67.1830 12.0086  10
   0  14  13 34.5063 9.55164   9
   0  14 -13 47.8159 9.32926   9
   0 -14 -13 43.7595 15.8673   7
   0 -14  14 47.5762 16.0221   1
   0 -14 -14 56.8070 11.6217   1
   0  14  14 74.5503 12.2839  12
   0 -14  14 39.2555 12.0508  12
   0  14  14 31.0221 13.3383   6
   0 -14 -14 48.2754 14.1564   5
   0  14 -14 60.3487 12.1867  11
   0  14  14 58.2193 11.4357   9
   0 -14 -14 44.9430 11.1794  10
   0 -14 -14 16.1234 14.7158   7
   0  14 -14 42.5301 11.1755   7
   0 -14  15 13.1974 14.3740   1
   0 -14 -15 32.0311 9.59903   1
   0 -14  15 35.0149 11.7414  13
   0  14  15 3.49704 11.2138  13
   0  14  15 28.7403 9.90549  12
   0 -14  15 2.16370 9.19933  12
   0  14  15 21.3486 12.4644   6
   0 -14 -15 40.1573 14.9266   5
   0  14 -15 21.0802 9.94771  11
   0 -14 -15 42.1889 11.0609  10
   0  14  15 34.6390 9.88312   9
   0 -14 -15 6.70514 15.5940   7
   0  14 -15 34.2441 12.1167   7
   0 -14 -16 20.4560 9.86456   1
   0 -14  16 30.7820 17.1327   1
   0  14  16 22.4340 9.55530  12
   0 -14  16 43.5194 12.2168  13
   0  14  16 28.7885 16.5111  13
   0 -14  16 34.0369 12.0748  12
   0 -14 -16 18.3966 14.1181   5
   0  14  16 35.8429 13.1259   6
   0  14 -16 19.4124 10.3965  11
   0 -14 -16 31.8850 10.7380  10
   0  14 -16 36.8787 11.4265   7
   0 -14 -16 31.5057 15.5540   7
   0 -14 -17 70.1873 13.7913   1
   0 -14  17 100.518 18.1735  13
   0  14  17 87.4834 15.3205  12
   0  14  17 98.9977 22.0746  13
   0 -14  17 87.6845 16.8558  12
   0 -14 -17 71.9653 19.7634   5
   0  14  17 111.180 19.4597   6
   0  14 -17 102.062 16.0887  11
   0 -14 -17 96.1549 15.5105  10
   0 -14 -17 73.7147 21.9735   7
   0  14 -17 76.9627 16.1924   7
   0  14  18 19.0532 16.7569  13
   0  14  18 2.03470 8.95591  12
   0 -14  18 15.7616 13.0513  13
   0 -14  18 22.3837 11.8465  12
   0  14  18 5.90208 11.5616   6
   0 -14 -18 3.48463 13.6490   5
   0  14 -18 7.91595 9.43053  11
   0 -14 -18 4.07527 8.96881   1
   0  14 -18 2.54091 11.3695   7
   0 -14 -18-19.3172 17.8454   7
   0  14  19 127.320 18.9454  12
   0 -14  19 159.639 22.9555  13
   0  14  19 127.211 24.1468  13
   0  14  19 128.435 22.1459   6
   0 -14 -19 88.8850 23.7487   5
   0 -14  19 116.810 20.3022  12
   0  14 -19 103.521 17.2801  11
   0 -14 -19 109.264 18.9174   1
   0 -14 -19 162.816 27.9704   7
   0  14 -19 177.336 24.1647   7
   0  14  20 17.7935 10.3250  12
   0 -14  20 8.62491 10.8065  13
   0  14  20 8.00739 14.6539  13
   0 -14 -20 7.85883 15.7491   5
   0  14  20 9.51440 12.9874   6
   0 -14  20 38.0508 14.5867  12
   0  14 -20 2.92233 12.2095   7
   0 -14 -20 15.6591 9.54746   1
   0  14  21 23.0559 14.2278   6
   0 -14 -21 16.6428 16.6394   5
   0 -14  21-3.01266 12.0490  13
   0  14  21 2.31769 9.64874  12
   0  14  21-16.6259 15.9149  13
   0 -14  21-11.3212 13.4726  12
   0  14 -21 21.9081 14.8977   7
   0 -14 -21 9.38582 9.57884   1
   0 -14 -22 8.76983 19.6271   5
   0  14  22 37.6391 16.7849   6
   0 -14 -22 7.32368 11.3118   1
   0  14  22 2.41239 9.89090  12
   0 -14  22 15.7028 12.0610  13
   0  14 -22 23.4131 14.4776   7
   0  14 -23 17.8281 16.5248   7
   0  15   0 6.46227 7.80508   6
   0  15   0 3.88723 4.13667   3
   0  15   0 8.78824 7.46996  11
   0 -15   0-6.45015 8.32790  10
   0  15   0-1.55078 7.27536   9
   0 -15   0 7.40952 8.81957   1
   0 -15  -1 2.14484 10.3578   7
   0  15  -1 10.5131 7.25289  11
   0  15   1 1.42875 6.28063  11
   0  15  -1-1.53107 6.61336   6
   0  15   1 1.69998 6.65510   6
   0 -15  -1 3.25887 6.91138  10
   0 -15   1-1.59887 6.78174  10
   0  15  -1-3.08717 7.66434   9
   0 -15  -1-3.69603 8.66571   1
   0 -15   1-1.90006 8.49512   1
   0 -15  -2 95.0520 20.4922   7
   0  15  -2 153.978 17.6509   6
   0  15   2 151.423 18.9177   6
   0  15   2 150.540 17.4373  11
   0  15  -2 117.057 17.0654  11
   0  15   2 126.652 17.0766   9
   0 -15   2 166.975 18.8817  10
   0  15  -2 116.861 16.9558   9
   0 -15  -2 168.736 19.6715   1
   0 -15   2 135.905 19.0409   1
   0 -15  -3 128.059 26.9480   7
   0 -15   3 235.084 24.8083  12
   0  15   3 228.356 23.9101  11
   0  15  -3 226.997 23.7910   6
   0  15   3 245.780 26.1271   6
   0 -15   3 231.234 24.6620  10
   0  15  -3 214.780 24.2192  11
   0  15  -3 214.265 24.0331   9
   0  15   3 263.987 25.2933   9
   0 -15   3 227.690 26.6975   1
   0 -15  -3 212.260 25.2952   1
   0 -15  -4 28.6807 17.7048   7
   0 -15   4 37.1535 10.2896  12
   0  15  -4 37.5546 9.12402   6
   0  15   4 52.1103 12.1553   6
   0  15  -4 45.3588 10.9722  11
   0 -15   4 55.2992 10.7326  10
   0  15   4 50.3184 9.53080  11
   0  15  -4 45.6821 10.3163   9
   0  15   4 48.9351 10.4098   9
   0 -15  -4 43.9900 10.6259  10
   0 -15  -4 84.9848 13.5755   1
   0 -15   4 37.8821 11.8586   1
   0 -15  -5 17.5358 17.6328   7
   0 -15   5 26.0103 8.80574  12
   0  15   5 15.9799 9.96451   6
   0  15   5 16.7289 7.29636  11
   0 -15   5 34.7614 9.40337  10
   0  15  -5 21.5927 8.88552  11
   0  15   5 39.7010 9.96815   9
   0 -15  -5 29.1205 8.93502  10
   0  15  -5 13.6187 7.74820   9
   0 -15   5 13.1708 9.50122   1
   0 -15  -5 47.7846 11.2858   1
   0 -15  -6 103.440 29.8644   7
   0 -15   6 160.012 20.2693  12
   0  15   6 166.435 21.9860   6
   0 -15   6 153.370 19.8861  10
   0  15   6 185.584 19.2554  11
   0  15   6 175.861 20.6352   9
   0 -15  -6 168.127 20.6588  10
   0  15  -6 192.378 20.6375   9
   0 -15  -6 172.845 21.1532   1
   0 -15   6 172.572 22.9090   1
   0 -15  -7 4.94193 22.9820   7
   0 -15   7 37.2156 9.65640  12
   0  15   7 19.3977 10.9029   6
   0  15  -7 27.9210 10.9107  11
   0 -15   7 34.7389 9.60074  10
   0  15   7 32.3756 8.46372  11
   0 -15  -7 38.6138 10.0929  10
   0  15   7 59.5942 11.3332   9
   0  15  -7 35.7872 9.50844   9
   0 -15  -7 39.3929 11.0818   1
   0 -15   7 29.3714 12.7719   1
   0 -15   8 170.684 19.7043  12
   0  15   8 160.854 21.5437   6
   0  15   8 158.110 17.0259  11
   0 -15   8 130.620 18.1093  10
   0  15  -8 153.605 19.5004  11
   0 -15  -8 134.966 18.6550  10
   0  15  -8 146.297 17.7865   9
   0  15   8 141.255 18.4074   9
   0 -15   8 130.945 21.4711   1
   0 -15  -8 178.261 19.9831   1
   0 -15  -9 62.2820 20.9354   7
   0 -15   9 64.7549 12.8683  12
   0  15   9 59.8358 14.4624   6
   0 -15  -9 93.6428 15.2461   5
   0 -15   9 92.2523 13.3404  10
   0  15  -9 73.1005 14.1745  11
   0  15  -9 73.0650 12.2503   9
   0  15   9 80.2917 13.3928   9
   0 -15  -9 75.4230 13.4241  10
   0 -15  -9 78.2587 13.6887   1
   0 -15   9 78.0859 16.9542   1
   0 -15 -10 3.82900 15.6328   7
   0 -15  10-5.58165 8.73397  12
   0 -15 -10-6.51034 8.68773   5
   0 -15  10 10.8281 7.89597  10
   0  15 -10 1.86598 9.02038  11
   0  15 -10 7.19152 7.15321   9
   0  15  10 3.30686 7.99513   9
   0 -15 -10 23.6218 9.38963  10
   0 -15  10 25.3889 13.6290   1
   0 -15 -10 8.65904 8.37316   1
   0 -15 -11 97.2388 22.6702   7
   0 -15  11 82.8911 14.5149  12
   0 -15 -11 98.2701 16.9524   5
   0  15 -11 75.4769 13.2214   7
   0 -15  11 92.9245 14.2088  10
   0  15 -11 99.1043 15.6755  11
   0  15 -11 74.8939 12.3979   9
   0 -15 -11 91.9125 14.8538  10
   0  15  11 81.6991 13.9804   9
   0 -15  11 82.6819 18.5358   1
   0 -15 -11 98.5418 14.9168   1
   0 -15 -12 17.5928 15.2790   7
   0 -15  12 28.0187 10.4512  12
   0  15 -12 17.7953 8.60075   7
   0  15  12 30.5698 13.0811   6
   0 -15 -12 16.9781 11.8180   5
   0  15 -12 3.88799 10.0340  11
   0 -15  12 11.9272 7.76132  10
   0  15  12 40.3760 10.4865   9
   0  15 -12 19.3319 7.38695   9
   0 -15 -12 27.9271 9.49961  10
   0 -15  12 24.6652 14.1004   1
   0 -15 -12 13.9204 8.89599   1
   0 -15 -13 70.1264 19.6365   7
   0 -15  13 47.8481 12.1323  12
   0 -15 -13 31.0280 14.1536   5
   0  15  13 28.8567 12.2851   6
   0  15 -13 36.8209 11.2954   7
   0  15 -13 33.6681 11.4720  11
   0  15  13 38.9287 10.5759   9
   0 -15 -13 32.1016 10.0716  10
   0 -15 -13 40.6330 10.3207   1
   0 -15  13 32.1105 14.4225   1
   0 -15 -14 81.4093 15.9059   1
   0 -15  14 122.885 23.5853   1
   0  15  14 91.2296 15.7203  12
   0 -15  14 112.687 18.5610  12
   0  15  14 144.181 21.9746   6
   0 -15 -14 124.043 20.8071   5
   0  15 -14 122.610 17.4546  11
   0 -15 -14 128.561 17.9280  10
   0  15  14 103.724 15.8114   9
   0 -15 -14 116.213 24.8124   7
   0  15 -14 130.191 17.8360   7
   0 -15 -15 166.202 21.5555   1
   0 -15  15 155.280 26.8016   1
   0  15  15 168.701 21.4422  12
   0 -15  15 164.374 22.7301  12
   0  15  15 151.342 25.0784   6
   0 -15 -15 117.795 22.9245   5
   0  15 -15 206.163 23.2919  11
   0  15  15 192.433 21.5595   9
   0 -15 -15 173.992 22.4675  10
   0  15 -15 178.528 22.7051   7
   0 -15 -16-1.93860 8.22248   1
   0 -15  16 17.8774 15.7169   1
   0 -15  16 2.52114 10.4934  13
   0  15  16-3.87564 8.66378  12
   0 -15  16-2.35352 9.21328  12
   0  15  16-8.66914 13.3433   6
   0 -15 -16 12.5590 13.5614   5
   0  15 -16 2.06790 9.39815  11
   0 -15 -16 5.99079 9.50464  10
   0  15 -16-2.20590 9.35622   7
   0 -15 -17 84.9200 14.7133   1
   0 -15  17 83.5857 16.9605  13
   0  15  17 66.1802 14.1435  12
   0  15  17 7.88892 15.0167  13
   0 -15  17 71.0527 15.3792  12
   0 -15 -17 53.5246 17.2327   5
   0  15  17 71.5555 18.5053   6
   0  15 -17 77.3042 14.8491  11
   0 -15 -17 81.7627 14.5696  10
   0  15 -17 78.1885 16.5953   7
   0  15  18 4.08468 14.7415  13
   0  15  18 43.8568 12.7480  12
   0 -15  18 56.9299 14.9289  13
   0 -15  18 94.8655 16.6022  12
   0 -15 -18 78.3329 19.7201   5
   0  15  18 55.4109 16.2314   6
   0  15 -18 48.4747 12.7371  11
   0 -15 -18 52.5904 12.4815   1
   0  15 -18 64.3955 15.4353   7
   0  15  19 16.7831 16.7999  13
   0 -15  19 62.2532 16.2234  13
   0  15  19 43.5763 12.5678  12
   0  15  19 50.9280 17.2039   6
   0 -15 -19 49.1549 18.3394   5
   0 -15  19 50.7436 15.2008  12
   0  15 -19 50.8802 13.0830  11
   0 -15 -19 39.6505 13.4377   1
   0  15 -19 35.9172 15.3700   7
   0  15  20 154.002 20.9866  12
   0  15  20 73.8893 23.9724  13
   0 -15  20 112.356 21.6817  13
   0  15  20 144.942 24.0605   6
   0 -15 -20 92.2185 25.8058   5
   0 -15  20 178.601 23.8906  12
   0 -15 -20 128.480 20.0887   1
   0  15 -20 162.670 24.7022   7
   0  15  21 27.2961 14.1714   6
   0 -15 -21 63.6557 19.4650   5
   0 -15 -21 24.0002 11.8842   1
   0 -15  21 33.8555 14.8829  13
   0  15  21 35.3199 13.1585  12
   0 -15 -22 93.9606 24.3619   5
   0 -15 -22 99.6756 18.6965   1
   0  16   0 192.974 23.2194   6
   0  16   0 189.052 22.5688   9
   0 -16   0 213.117 23.3256  10
   0 -16   0 250.437 25.4985   1
   0  16   0 156.069 21.3458  11
   0  16   1 215.276 22.7102   6
   0  16  -1 171.974 20.7826   6
   0 -16   1 171.466 20.7487  10
   0 -16  -1 160.568 20.7286  10
   0  16  -1 170.123 20.6649   9
   0 -16  -1 169.033 22.1121   1
   0 -16   1 181.853 22.7607   1
   0  16   1 137.102 19.1527  11
   0  16  -1 166.266 20.2810  11
   0  16   2 1.90780 7.78797   6
   0  16  -2 4.71622 7.14647   6
   0  16  -2-6.61292 7.75376  11
   0  16   2 1.50589 6.84576  11
   0 -16   2-6.88486 7.94928  10
   0  16   2 6.74697 8.59977   9
   0  16  -2-4.98463 7.43024   9
   0 -16   2-8.48422 10.3893   1
   0 -16  -2 2.01721 9.02007   1
   0 -16   3 53.8170 11.7463  12
   0  16  -3 60.1092 10.8766   6
   0  16   3 65.6615 13.4551   6
   0  16   3 51.4818 11.0781  11
   0 -16   3 35.9934 10.5567  10
   0  16  -3 66.0542 12.2218  11
   0  16   3 57.5279 11.8140   9
   0  16  -3 39.6853 10.6792   9
   0 -16  -3 66.8364 13.3696   1
   0 -16   3 43.6640 12.7897   1
   0  16   4 343.036 34.1596  11
   0  16  -4 341.940 35.3487  11
   0 -16   4 361.300 35.3795  12
   0  16  -4 328.598 33.9361   6
   0  16   4 331.908 36.5351   6
   0 -16  -4 350.971 35.6003  10
   0 -16   4 359.168 35.4036  10
   0  16   4 346.884 35.2990   9
   0  16  -4 367.065 35.6234   9
   0 -16  -4 429.740 38.1581   1
   0 -16   4 340.848 37.3401   1
   0 -16   5 78.2488 14.0905  12
   0  16   5 68.1821 14.9296   6
   0  16   5 78.2228 12.6887  11
   0  16  -5 58.6848 13.3553  11
   0 -16   5 83.6904 13.6812  10
   0 -16  -5 107.286 15.4098  10
   0  16  -5 99.8364 14.4008   9
   0  16   5 76.9241 13.8318   9
   0 -16  -5 82.6920 14.7503   1
   0 -16   5 89.3481 16.5368   1
   0 -16   6 169.184 20.6119  12
   0  16   6 176.108 22.3845   6
   0 -16   6 150.437 20.0386  10
   0  16   6 139.628 18.3945  11
   0  16   6 134.193 19.3147   9
   0  16  -6 156.105 19.5516   9
   0 -16  -6 183.224 21.2877  10
   0 -16  -6 175.480 21.7261   1
   0 -16   6 204.510 24.3529   1
   0 -16   7 268.845 31.1076  12
   0  16   7 334.998 30.6325  11
   0  16   7 309.475 33.8674   6
   0 -16   7 324.154 32.1881  10
   0 -16  -7 328.978 32.7713  10
   0  16  -7 296.999 31.2003   9
   0  16   7 287.614 31.5613   9
   0 -16  -7 314.380 32.9325   1
   0 -16   7 287.414 34.8684   1
   0 -16   8 816.113 71.6628  12
   0  16  -8 846.659 72.1872  11
   0  16   8 792.474 68.9629  11
   0  16   8 911.161 74.7159   6
   0 -16  -8 754.819 71.2726  10
   0 -16   8 800.880 70.9728  10
   0  16   8 738.384 70.4832   9
   0  16  -8 803.243 70.5266   9
   0 -16  -8 833.678 72.1798   1
   0 -16   8 741.622 74.5702   1
   0 -16   9 24.8439 9.65994  12
   0  16   9 17.0583 11.7391   6
   0 -16  -9 23.1305 9.35126  10
   0  16   9 17.6047 9.04148   9
   0  16  -9 31.6672 9.49418   9
   0 -16  -9 30.3560 10.0802   1
   0 -16   9 11.4595 12.5060   1
   0 -16   9 18.6097 8.59289  10
   0  16  -9 27.2764 10.7034  11
   0 -16  10 15.7834 9.11647  12
   0  16  10 10.6687 9.18597   9
   0 -16 -10 13.6306 9.93209  10
   0  16 -10 6.24137 6.62702   9
   0 -16  10-5.99160 12.4737   1
   0 -16 -10 1.87835 8.26387   1
   0  16 -10-1.99013 8.75484  11
   0 -16  10-1.67390 7.73685  10
   0 -16  11 122.346 18.7935  12
   0  16 -11 142.214 19.6760  11
   0 -16  11 128.609 17.6443  10
   0  16  11 118.353 17.7331   9
   0  16 -11 147.230 17.5279   9
   0 -16 -11 147.586 19.7595  10
   0 -16  11 112.662 22.8968   1
   0 -16 -11 119.479 18.0896   1
   0 -16  12 6.30565 9.70653  12
   0 -16 -12 12.7356 11.5770   5
   0 -16  12-1.61447 7.33885  10
   0  16 -12 2.06778 9.24592  11
   0 -16 -12 7.95876 9.18855  10
   0  16  12-1.80945 8.86316   9
   0  16 -12-1.50051 6.71017   9
   0 -16  12 12.9292 13.9620   1
   0 -16 -12-1.86934 7.78184   1
   0 -16  13-4.36042 10.5286  12
   0  16  13 8.28482 11.9282   6
   0 -16 -13-5.38724 12.2420   5
   0  16 -13 2.10550 9.09436  11
   0 -16 -13 18.1368 9.44959  10
   0  16  13-1.82104 8.66755   9
   0 -16 -13-9.43699 9.11455   1
   0 -16  13 3.36449 13.1710   1
   0 -16  14 2.26343 8.86140  12
   0  16  14 2.83904 10.8703   6
   0 -16 -14-11.4357 11.6688   5
   0  16 -14-2.13999 10.4815  11
   0 -16 -14 4.08980 8.67416  10
   0  16  14 5.49094 9.56717   9
   0 -16 -14 3.84472 9.15047   1
   0 -16  14 10.4820 14.2607   1
   0 -16  15 42.3964 12.6770  12
   0  16  15 70.5426 16.5385   6
   0 -16 -15 57.7298 17.4126   5
   0  16 -15 60.7871 14.4451  11
   0 -16 -15 54.0756 13.4776  10
   0 -16  15 65.1574 19.2216   1
   0 -16 -15 59.1123 13.1480   1
   0 -16  16 73.8264 16.6962  13
   0  16  16 42.5227 11.8141  12
   0 -16  16 48.8503 14.6336  12
   0  16  16 72.6005 18.1747   6
   0 -16 -16 41.9961 16.6326   5
   0  16 -16 74.6290 14.2248  11
   0 -16 -16 53.0078 13.0054  10
   0 -16  16 85.9105 20.9211   1
   0 -16 -16 42.7113 12.6465   1
   0 -16  17 13.5834 11.4918  13
   0  16  17 27.1317 10.9680  12
   0 -16  17 28.0322 12.3015  12
   0 -16 -17 48.0622 17.8413   5
   0  16  17 21.8051 14.3049   6
   0  16 -17 17.7453 10.7550  11
   0 -16 -17 36.8651 11.3815  10
   0 -16 -17 37.9753 12.3487   1
   0 -16  17 7.71454 15.5605   1
   0 -16  18 55.5992 15.9505  12
   0  16  18 77.0346 18.4829   6
   0 -16 -18 87.5512 21.7726   5
   0  16 -18 118.521 17.9665  11
   0 -16  18 81.5891 19.0075  13
   0  16  18 77.5946 15.7153  12
   0 -16 -18 72.0819 15.2805   1
   0 -16  19 13.8159 12.5710  12
   0  16 -19-2.24991 11.3355  11
   0 -16 -19 3.87053 15.4883   5
   0  16  19 9.93171 14.0532   6
   0 -16 -19 15.9428 10.1986   1
   0  16  19 2.23860 8.97008  12
   0 -16  19 17.4967 12.6084  13
   0  16  20 61.5441 19.3462   6
   0 -16 -20 65.6333 21.5509   5
   0 -16 -20 37.8325 12.8445   1
   0  16  20 41.7567 13.4504  12
   0 -16  20 69.8428 16.9206  13
   0 -16 -21-8.67543 18.4064   5
   0  16  21-9.62116 11.1200  12
   0 -16 -21-2.46610 11.0392   1
   0  17   0 1.86924 8.21885   6
   0 -17   0 9.41989 8.42515  10
   0  17   0 10.7985 8.31246   9
   0 -17   0-4.39233 9.14275   1
   0  17   0-3.38213 8.51120  11
   0  17   1 21.4555 10.4448   6
   0  17  -1 1.78198 7.97293   6
   0  17  -1 1.79475 8.16254   9
   0 -17   1 3.74009 7.16630  10
   0 -17  -1 1.90340 7.77448  10
   0 -17  -1 6.55213 9.09554   1
   0 -17   1 8.89537 10.2732   1
   0  17  -1-1.72898 7.86383  11
   0  17   1 1.65435 7.64516  11
   0  17  -2-1.69756 7.59080   6
   0  17   2-4.07268 9.69315   6
   0  17   2-1.61973 7.48034  11
   0  17  -2 3.53788 7.50410  11
   0  17   2-10.8654 9.11310   9
   0 -17   2 9.28589 8.84049  10
   0 -17  -2 7.69647 9.68274  10
   0  17  -2-1.78736 7.72130   9
   0 -17   2-9.09203 10.3312   1
   0 -17  -2-2.18564 9.09799   1
   0 -17   3 33.3403 10.2575  12
   0  17   3 46.4283 12.4344   6
   0  17  -3 22.7356 9.11102   6
   0  17  -3 41.6223 11.2711  11
   0 -17   3 33.2742 10.2389  10
   0  17   3 58.6141 11.0109  11
   0  17   3 34.5428 11.0238   9
   0  17  -3 44.5357 11.0125   9
   0 -17  -3 52.6376 13.8527   1
   0 -17   3 30.3909 12.5898   1
   0  17  -4 455.672 41.7047  11
   0  17   4 389.999 39.7606  11
   0 -17   4 416.806 41.1183  12
   0  17  -4 392.986 39.8058   6
   0  17   4 444.976 43.0079   6
   0 -17   4 407.097 40.9911  10
   0 -17  -4 413.501 41.8588  10
   0  17   4 445.433 41.6724   9
   0  17  -4 450.346 41.4926   9
   0 -17   4 393.499 43.1837   1
   0 -17  -4 417.337 42.4798   1
   0 -17   5 3.70734 7.47965  12
   0  17   5 13.5880 10.0049   6
   0  17   5 7.55030 7.04395  11
   0 -17   5 22.0877 9.43588  10
   0  17  -5 37.9082 11.0940  11
   0  17  -5 7.05195 8.69205   9
   0  17   5 9.17323 9.04076   9
   0 -17  -5 11.9371 8.95084  10
   0 -17  -5 17.5095 10.7658   1
   0 -17   5 15.2867 10.6512   1
   0 -17   6 7.50596 7.70804  12
   0  17   6 21.0275 11.9418   6
   0 -17   6 9.18783 8.78945  10
   0  17   6 7.34132 7.04253  11
   0  17  -6 15.7668 8.62410   9
   0  17   6 16.6127 8.82872   9
   0 -17  -6 26.1211 10.5381  10
   0 -17   6-2.65894 11.7204   1
   0 -17  -6 8.67489 9.57290   1
   0 -17   7 21.1091 9.99215  12
   0  17   7 31.3508 12.7681   6
   0  17   7 28.3817 8.90445  11
   0 -17   7 33.0580 10.6897  10
   0  17  -7 34.7994 10.7282   9
   0 -17  -7 30.4447 10.9284  10
   0  17   7 16.7222 8.81794   9
   0 -17   7 16.6917 12.8064   1
   0 -17  -7 21.3780 11.2229   1
   0 -17   8 29.5330 10.5983  12
   0  17   8 29.8868 12.6845   6
   0  17  -8 28.3855 10.7771  11
   0 -17   8 45.7217 11.1440  10
   0  17   8 16.3345 7.37979  11
   0  17   8 28.0718 10.0923   9
   0  17  -8 15.5310 8.78968   9
   0 -17  -8 22.5391 10.0873  10
   0 -17  -8 23.1664 11.4420   1
   0 -17   8 26.1727 13.5704   1
   0 -17   9 38.4880 12.0833  12
   0  17   9 25.7357 11.4810   6
   0  17  -9 22.7968 11.2645  11
   0 -17   9 41.8521 10.7866  10
   0  17   9 28.3077 10.7408   9
   0 -17  -9 30.9670 11.5959  10
   0  17  -9 11.9471 8.69749   9
   0 -17  -9 22.7503 10.5895   1
   0 -17   9 9.11878 11.8011   1
   0 -17  10 49.8826 12.0568  12
   0  17  10 52.8965 14.5086   6
   0 -17 -10 35.4103 11.4674  10
   0  17  10 49.5442 12.3624   9
   0  17 -10 45.4841 10.6809   9
   0 -17  10 84.7771 18.7528   1
   0 -17 -10 26.4933 11.7209   1
   0  17 -10 27.4727 11.0977  11
   0 -17  10 28.8170 9.82537  10
   0 -17  11 15.0101 9.80539  12
   0  17  11 21.1483 9.73446   9
   0  17 -11 18.2074 8.39885   9
   0 -17 -11 16.8084 10.2039  10
   0 -17 -11 6.04923 9.37357   1
   0 -17  11 19.6646 13.9432   1
   0  17 -11 6.46830 10.3192  11
   0 -17  11 8.87443 8.63927  10
   0 -17  12 2.21440 11.0070  12
   0 -17  12 1.73896 7.92008  10
   0  17 -12 8.78676 9.50220  11
   0 -17 -12 8.48927 9.65932  10
   0  17  12 21.3164 9.76460   9
   0  17 -12 3.24512 7.39230   9
   0 -17 -12 8.08122 9.19640   1
   0 -17  12 3.41304 14.4855   1
   0 -17  13 13.7470 10.3257  12
   0  17  13 11.6069 13.6684   6
   0  17 -13 33.4652 12.2853  11
   0  17  13 23.4280 9.90942   9
   0 -17 -13 10.7333 8.85719  10
   0 -17 -13 10.1576 9.61428   1
   0 -17  13 17.7271 14.2372   1
   0 -17  14-7.11966 10.2604  12
   0  17  14 14.8941 12.8741   6
   0  17 -14 13.6082 10.8043  11
   0 -17 -14-2.17472 9.73320  10
   0  17  14 3.92213 8.48221   9
   0 -17  14 7.30821 14.9203   1
   0 -17 -14 20.5721 10.4964   1
   0 -17  15 41.6782 11.9577  12
   0  17  15 18.3536 12.2563   6
   0  17 -15 34.4893 13.5258  11
   0 -17 -15 37.5537 12.6349  10
   0 -17  15 15.1325 16.5478   1
   0 -17 -15 41.9918 12.0363   1
   0 -17  16 2.76072 12.1468  13
   0 -17  16 17.8345 10.8192  12
   0  17  16 6.32394 11.5547   6
   0  17 -16 9.31223 10.7627  11
   0 -17 -16 2.24926 8.82092  10
   0 -17  16-7.81443 15.6334   1
   0 -17 -16 12.8646 10.3675   1
   0 -17  17 22.6264 13.1292  13
   0 -17  17 13.1953 11.4784  12
   0  17  17 29.2524 14.8332   6
   0  17 -17 14.1079 11.1078  11
   0 -17 -17 16.0740 10.6886  10
   0 -17 -17 11.0601 9.30513   1
   0 -17  17 28.1588 16.1427   1
   0  17 -18 2.37180 10.4293  11
   0 -17  18 2.74724 11.4376  12
   0 -17  18 11.6627 12.5965  13
   0  17  18-8.98075 9.70135  12
   0 -17 -18-4.58439 8.57844   1
   0  17  18-16.7145 14.9481   6
   0  17 -19-2.38648 11.2082  11
   0 -17  19-5.69675 12.3191  12
   0  17  19 13.7627 14.0567   6
   0  17  19 16.2137 10.3749  12
   0 -17  19 3.01871 11.3094  13
   0 -17 -19 28.4155 11.1215   1
   0  17  20 129.179 20.8116  12
   0 -17  20 134.259 23.7664  13
   0 -17 -20 145.305 21.3570   1
   0  18   0 41.9611 12.6891   6
   0  18   0 57.8905 12.8789   9
   0 -18   0 56.7495 12.2021  10
   0 -18   0 40.4526 13.6231   1
   0  18   0 28.9074 10.3797  11
   0  18   1 79.0426 15.3692   6
   0  18  -1 101.238 15.8306   6
   0  18  -1 76.9395 14.6285   9
   0 -18   1 96.4191 16.0789  10
   0 -18  -1 63.3967 15.2559  10
   0 -18   1 84.4863 17.4662   1
   0 -18  -1 82.7029 16.4937   1
   0  18  -1 110.723 16.6052  11
   0  18   1 104.415 15.4509  11
   0  18   2 4.33209 10.4685   6
   0  18  -2 1.82506 7.75234   6
   0  18  -2 5.65681 9.49732  11
   0 -18   2 1.99460 9.07479  10
   0  18   2 5.20215 7.36691  11
   0 -18  -2 14.4684 9.09534  10
   0  18  -2 7.67203 8.29509   9
   0 -18  -2-4.71858 10.0156   1
   0 -18   2 17.2704 12.4216   1
   0 -18   3 13.7957 9.71555  12
   0  18   3 6.72384 9.39402   6
   0  18  -3 6.99922 7.50381   6
   0  18  -3 21.2047 10.0132  11
   0 -18   3 15.8798 10.1790  10
   0  18   3 22.0980 9.67661  11
   0  18  -3 7.64485 9.02997   9
   0  18   3 33.0868 10.4764   9
   0 -18   3 5.06233 10.5931   1
   0 -18  -3 16.5406 11.1352   1
   0 -18   4 107.907 16.5662  12
   0  18  -4 89.7852 14.3821   6
   0  18   4 99.9093 17.2762   6
   0 -18   4 94.9555 15.3752  10
   0  18  -4 96.5749 16.0730  11
   0  18   4 109.756 15.7857  11
   0  18  -4 78.0004 14.5956   9
   0 -18  -4 101.376 16.2753  10
   0  18   4 64.4888 14.7215   9
   0 -18  -4 111.156 18.2588   1
   0 -18   4 80.9895 17.5655   1
   0  18   5 287.797 30.9718  11
   0  18  -5 298.334 33.1324  11
   0 -18   5 304.008 32.5299  12
   0  18   5 309.238 34.4097   6
   0 -18   5 315.866 32.9666  10
   0 -18  -5 303.012 33.3048  10
   0  18  -5 304.693 32.4792   9
   0  18   5 286.592 32.2877   9
   0 -18  -5 327.930 34.6159   1
   0 -18   5 298.518 35.8030   1
   0 -18   6 167.615 22.0233  12
   0  18   6 192.885 24.6777   6
   0  18  -6 162.791 22.8457  11
   0 -18   6 177.455 22.1563  10
   0  18   6 172.491 20.7491  11
   0  18   6 149.995 21.3952   9
   0  18  -6 201.336 22.4961   9
   0 -18  -6 152.849 22.3655  10
   0 -18   6 169.683 26.0927   1
   0 -18  -6 178.936 23.9385   1
   0 -18   7 624.693 56.5168  12
   0  18   7 565.802 53.7747  11
   0  18   7 670.425 59.4225   6
   0 -18   7 553.134 55.3025  10
   0 -18  -7 649.451 57.7030  10
   0  18  -7 609.270 55.7960   9
   0  18   7 566.033 55.6240   9
   0 -18  -7 675.343 58.5301   1
   0 -18   7 513.815 58.6189   1
   0 -18   8 22.9345 10.9750  12
   0  18   8 5.25656 10.3711   6
   0 -18   8 35.2926 11.1646  10
   0  18   8 22.0075 9.88488   9
   0 -18  -8 8.75854 9.54707  10
   0  18  -8 31.5166 10.4562   9
   0 -18   8-3.08297 12.1390   1
   0 -18  -8 9.12432 10.2814   1
   0 -18   9 287.801 31.3930  12
   0  18   9 279.258 33.8132   6
   0  18  -9 294.737 31.8454  11
   0 -18   9 290.136 30.9726  10
   0  18   9 268.209 30.7756   9
   0  18  -9 253.148 29.6238   9
   0 -18  -9 284.360 31.8304  10
   0 -18   9 232.079 34.2358   1
   0 -18  -9 336.904 33.6237   1
   0 -18  10 8.77538 9.64371  12
   0  18  10-2.78254 12.0187   6
   0  18 -10 6.72491 10.0222  11
   0 -18  10 3.86100 8.91425  10
   0  18 -10-3.62260 8.23214   9
   0  18  10-10.1679 9.39025   9
   0 -18 -10 8.88391 10.4145  10
   0 -18 -10-2.20984 9.19789   1
   0 -18  10 3.31880 12.4144   1
   0 -18  11 15.8125 9.78304  12
   0  18  11 17.2375 12.6487   6
   0  18 -11 1.78067 7.99312   9
   0  18  11 4.10646 8.89719   9
   0 -18 -11 22.3891 10.9885  10
   0 -18 -11-8.73634 11.2980   1
   0 -18  11 3.45759 13.5542   1
   0 -18  11 26.6375 10.3268  10
   0  18 -11 13.7141 11.0609  11
   0 -18  12 13.9705 11.4739  12
   0 -18 -12 6.77413 9.48341  10
   0  18  12 28.9817 11.1528   9
   0  18 -12 10.4858 8.88461   9
   0 -18  12 21.5783 16.1289   1
   0 -18 -12 17.3621 9.29188   1
   0  18 -12 9.29280 10.4638  11
   0 -18  12 26.1165 9.71354  10
   0 -18  13 79.3581 16.0230  12
   0  18 -13 61.4356 15.1751  11
   0 -18 -13 66.1099 15.1733  10
   0  18  13 56.3383 14.2638   9
   0 -18 -13 91.2847 15.3991   1
   0 -18  13 51.8350 20.3229   1
   0 -18  14 51.9705 14.4286  12
   0  18  14 49.9027 15.5962   6
   0  18 -14 57.5851 14.8220  11
   0 -18 -14 62.2983 13.7914  10
   0  18  14 54.5041 13.0987   9
   0 -18  14 57.5452 20.2148   1
   0 -18 -14 35.0785 11.6141   1
   0 -18  15 81.9789 16.5695  12
   0  18  15 44.7811 16.2606   6
   0  18 -15 26.7132 12.2354  11
   0 -18 -15 65.5028 14.7097  10
   0 -18  15 23.7860 18.3518   1
   0 -18 -15 35.6441 11.8801   1
   0 -18  16 47.5967 14.6148  12
   0  18  16 49.2058 17.2497   6
   0  18 -16 63.8660 14.9318  11
   0 -18 -16 33.2979 12.5452  10
   0 -18  16 52.9698 19.8502   1
   0 -18 -16 83.8195 15.3872   1
   0 -18  17 97.2962 20.0230  13
   0 -18  17 71.3827 16.6924  12
   0  18  17 138.863 23.4958   6
   0  18 -17 54.5934 16.2809  11
   0 -18 -17 114.034 18.4874  10
   0 -18 -17 104.772 17.2286   1
   0 -18  17 58.7416 20.2791   1
   0 -18  18 5.70376 11.8702  12
   0  18 -18 5.00429 10.4146  11
   0 -18 -18-4.80869 10.1982   1
   0 -18  18 3.02953 13.5448  13
   0  18 -19 83.0598 16.1570  11
   0 -18  19 31.1608 14.6472  13
   0 -18 -19 61.8688 14.5684   1
   0  19   0-4.26125 8.86806   6
   0 -19   0-2.17145 9.54515  10
   0  19   0 12.3743 9.37315   9
   0 -19   0 2.57348 10.5033   1
   0  19   0-3.84941 8.74742  11
   0  19   1 15.4864 10.4242   6
   0  19  -1 14.2889 10.1866   6
   0  19  -1 9.81864 9.26469  11
   0  19   1 9.43791 7.61713  11
   0 -19  -1 8.76671 8.64041  10
   0 -19   1 25.8380 11.1627  10
   0  19  -1 20.5658 10.6663   9
   0 -19  -1 2.54981 11.8180   1
   0 -19   1 20.5847 12.2895   1
   0 -19   2 12.7318 10.3152  12
   0  19  -2 35.1970 9.80367   6
   0  19   2 18.3804 11.1348   6
   0 -19   2 51.3087 13.1106  10
   0  19   2 24.0666 9.54843  11
   0  19  -2 40.0896 11.7582  11
   0 -19  -2 19.9091 10.7357  10
   0  19  -2 28.7016 11.9003   9
   0 -19  -2 7.61580 11.7264   1
   0 -19   2 36.8238 12.5106   1
   0 -19   3 43.9561 12.1884  12
   0  19   3 28.4791 11.6989   6
   0  19  -3 28.1852 10.4415   6
   0  19   3 23.6371 9.78926  11
   0 -19   3 25.4799 10.6611  10
   0  19  -3 45.0484 12.2796  11
   0  19   3 35.3322 11.4958   9
   0  19  -3 34.7328 11.3090   9
   0 -19   3 8.08955 11.0359   1
   0 -19  -3 32.9668 13.3007   1
   0 -19   4 41.7044 12.9504  12
   0  19   4 44.2359 13.7467   6
   0  19   4 67.6834 12.7944  11
   0 -19   4 80.4317 14.5260  10
   0  19  -4 60.6540 13.6417  11
   0  19  -4 54.9248 12.7803   9
   0  19   4 54.2178 13.0623   9
   0 -19   4 58.3870 15.8662   1
   0 -19  -4 48.1706 14.2870   1
   0 -19   5 62.8256 13.9547  12
   0  19   5 65.8185 15.4587   6
   0 -19   5 107.722 16.1225  10
   0  19  -5 53.4227 13.6435  11
   0  19   5 90.6359 15.0439  11
   0 -19  -5 70.6921 14.5164  10
   0  19   5 60.7240 13.8483   9
   0  19  -5 87.0744 14.8259   9
   0 -19   5 60.5740 17.4831   1
   0 -19  -5 91.7771 17.1418   1
   0 -19   6 4.22972 9.45929  12
   0  19   6 7.82397 11.4673   6
   0 -19   6-2.10777 9.10822  10
   0  19  -6 2.18295 10.0835  11
   0  19   6 10.1762 8.19497  11
   0  19   6 10.5219 10.0198   9
   0  19  -6 4.02715 9.15540   9
   0 -19  -6 2.29958 9.57518  10
   0 -19  -6-5.05393 10.5212   1
   0 -19   6-3.00094 12.0036   1
   0 -19   7-4.30475 9.78234  12
   0  19   7-5.37386 12.0131   6
   0  19   7 1.64412 8.27322  11
   0 -19   7-2.10031 8.90865  10
   0 -19  -7-4.63650 10.0134  10
   0  19   7 8.46854 10.2241   9
   0  19  -7 5.99981 9.08955   9
   0 -19  -7 12.4694 11.3344   1
   0 -19   7 3.12760 13.5092   1
   0 -19   8 33.0431 12.0549  12
   0  19   8 49.8057 14.6141   6
   0 -19   8 39.7856 12.4739  10
   0  19  -8 29.7439 11.2879   9
   0 -19  -8 35.0140 12.5846  10
   0  19   8 49.0254 12.1974   9
   0 -19  -8 39.4466 13.0965   1
   0 -19   8 42.3867 16.9048   1
   0 -19   9 4.49797 10.2212  12
   0  19   9-5.67374 13.3024   6
   0 -19   9 4.15847 9.60094  10
   0  19  -9-6.97164 9.48460  11
   0  19  -9 3.92457 10.0030   9
   0 -19  -9 2.34718 9.38615  10
   0  19   9-2.14909 9.11532   9
   0 -19  -9 4.85448 10.1026   1
   0 -19   9 3.35654 14.2366   1
   0 -19  10-11.5496 9.80277  12
   0  19  10 11.6899 13.4984   6
   0  19 -10 2.37086 9.28681  11
   0 -19  10-8.24334 10.0984  10
   0 -19 -10 2.36231 10.3892  10
   0  19  10 4.33446 9.36649   9
   0  19 -10-3.87652 9.23108   9
   0 -19 -10-7.16171 10.6780   1
   0 -19  10-10.4982 16.6589   1
   0 -19  11 45.1358 14.0315  12
   0  19  11 27.1145 14.3866   6
   0 -19  11 22.3508 10.8117  10
   0  19 -11 12.0572 10.1041  11
   0  19 -11 7.63825 8.61648   9
   0  19  11 4.37018 9.83844   9
   0 -19 -11 2.37723 11.3745  10
   0 -19 -11 18.8581 11.2799   1
   0 -19  11 18.2078 17.3715   1
   0 -19  12 2.44461 11.2904  12
   0  19  12-3.08805 12.8550   6
   0  19  12-2.20579 9.69883   9
   0  19 -12 13.1268 8.79634   9
   0 -19 -12 2.39473 10.1598  10
   0 -19 -12 2.33434 9.14114   1
   0 -19  12 3.78120 16.0394   1
   0  19 -12 2.45560 12.6792  11
   0 -19  13 50.1750 13.5925  12
   0 -19 -13 28.9771 12.3317  10
   0  19  13 53.2965 12.9893   9
   0 -19  13 3.88641 15.0279   1
   0 -19 -13 18.6363 11.7566   1
   0  19 -13 9.96780 10.7772  11
   0 -19  14 222.562 28.7921  12
   0  19 -14 224.989 29.2085  11
   0  19  14 261.325 28.9063   9
   0 -19 -14 209.883 28.1075  10
   0 -19 -14 243.314 28.8036   1
   0 -19  14 217.030 33.9355   1
   0 -19  15 144.387 22.6788  12
   0  19  15 163.619 26.2761   6
   0  19 -15 148.571 22.7591  11
   0 -19 -15 165.584 22.7109  10
   0 -19 -15 134.904 21.5733   1
   0 -19  15 111.405 27.1007   1
   0 -19  16-5.50644 11.8926  12
   0  19  16-10.2554 15.7854   6
   0  19 -16 2.59139 11.3918  11
   0 -19 -16 12.5452 10.4439  10
   0 -19  16-21.2680 18.6982   1
   0 -19 -16 2.41073 9.83988   1
   0 -19  17-3.07081 12.7862  13
   0  19 -17 23.4953 12.4305  11
   0 -19 -17-2.55524 10.4349  10
   0 -19  17 2.85292 12.7601  12
   0 -19 -17 4.91101 10.0281   1
   0  19 -18 10.5285 11.3709  11
   0 -19  18-3.14002 15.1650  13
   0 -19 -18 2.52468 9.21867   1
   0  20   0 308.811 31.3776  11
   0  20   0 301.313 32.1936   6
   0 -20   0 292.004 31.8326  10
   0  20   0 228.508 29.6049   9
   0 -20   0 226.792 31.8937   1
   0  20   1 136.424 20.4565   6
   0  20  -1 124.059 19.2013   6
   0  20  -1 149.841 20.3328  11
   0  20   1 132.519 19.4100  11
   0 -20   1 133.231 20.4584  10
   0  20  -1 140.225 20.3385   9
   0 -20  -1 138.109 21.0897  10
   0 -20   1 116.724 21.5900   1
   0 -20  -1 161.833 24.1328   1
   0 -20   2 29.2068 11.0164  12
   0  20   2 31.6040 11.0357   6
   0  20  -2 20.8989 9.68839   6
   0  20  -2 16.9756 10.1318  11
   0 -20   2 29.6492 12.4959  10
   0  20   2 49.2882 12.5081  11
   0 -20  -2 21.2689 10.9090  10
   0  20  -2 6.55471 10.5734   9
   0 -20  -2 35.4036 14.0134   1
   0 -20   2 17.0286 11.9662   1
   0  20   3 274.769 29.9363  11
   0 -20   3 235.077 30.0569  12
   0  20  -3 309.707 31.7363  11
   0  20  -3 263.639 29.9217   6
   0  20   3 310.906 33.0106   6
   0 -20   3 272.085 31.0140  10
   0  20   3 236.721 29.8019   9
   0  20  -3 265.661 30.7216   9
   0 -20   3 206.337 31.7391   1
   0 -20  -3 314.606 34.2766   1
   0 -20   4 19.8749 10.9873  12
   0  20   4 67.3689 15.4398   6
   0 -20   4 27.1011 12.2303  10
   0  20   4 41.8016 12.1391  11
   0  20  -4 48.7136 13.5419  11
   0  20   4 39.8997 11.7441   9
   0  20  -4 45.5502 12.4275   9
   0 -20   4 50.9240 16.3503   1
   0 -20  -4 46.4827 14.4741   1
   0 -20   5 4.43236 9.74753  12
   0  20   5 5.33223 10.4424   6
   0 -20   5 13.4918 10.3885  10
   0  20  -5 6.78146 9.04564  11
   0  20   5 13.0118 9.48153  11
   0 -20  -5 2.43002 10.6870  10
   0  20   5-8.90025 10.4389   9
   0  20  -5 2.15918 9.81877   9
   0 -20  -5 8.15814 12.1627   1
   0 -20   5 3.05891 13.4504   1
   0 -20   6 29.0537 11.9920  12
   0  20   6 49.3475 13.7583   6
   0  20  -6 36.9267 13.4469  11
   0 -20   6 76.2613 14.6677  10
   0  20   6 56.2436 12.7733  11
   0  20  -6 49.4117 13.3041   9
   0 -20  -6 53.8592 14.2023  10
   0  20   6 35.7684 11.8554   9
   0 -20   6 38.1273 17.0233   1
   0 -20  -6 59.3154 14.7459   1
   0 -20   7 163.637 21.8753  12
   0  20   7 132.642 23.0733   6
   0  20  -7 129.564 21.6135  11
   0 -20   7 134.207 20.7620  10
   0 -20  -7 152.879 22.1555  10
   0  20  -7 138.756 20.7828   9
   0  20   7 152.902 21.3956   9
   0 -20   7 158.736 25.2419   1
   0 -20  -7 160.938 23.5844   1
   0 -20   8 2.32202 8.69212  12
   0  20   8 11.5606 12.2629   6
   0 -20   8 2.22579 9.95681  10
   0 -20  -8 24.8043 11.8106  10
   0  20   8 9.06259 10.6291   9
   0  20  -8 2.11601 8.64256   9
   0 -20  -8-2.65382 11.6702   1
   0 -20   8-13.7670 14.3290   1
   0 -20   9 16.5727 10.7815  12
   0  20   9-2.97716 11.4188   6
   0  20  -9 9.80710 10.9827  11
   0 -20   9 8.84823 10.0764  10
   0  20  -9-2.09487 9.54505   9
   0  20   9 9.13097 10.0574   9
   0 -20  -9 7.47853 11.7090  10
   0 -20   9 35.8072 17.0564   1
   0 -20  -9 18.2293 12.4136   1
   0 -20  10 2.42744 9.90721  12
   0  20  10-15.3209 15.2141   6
   0 -20  10 8.75775 10.1097  10
   0  20 -10 17.4750 11.8820  11
   0 -20 -10 7.51741 11.5706  10
   0  20 -10-2.06954 9.25268   9
   0  20  10-9.20815 10.9568   9
   0 -20 -10 10.2669 11.0864   1
   0 -20  10 18.4051 14.4100   1
   0 -20  11 4.98427 10.9999  12
   0  20  11 12.5544 14.2990   6
   0 -20  11 28.0903 10.4821  10
   0  20 -11 12.7142 11.0282  11
   0 -20 -11 10.0754 11.1169  10
   0  20 -11 18.3562 9.61548   9
   0  20  11 6.96648 10.7687   9
   0 -20  11-3.82562 14.6807   1
   0 -20 -11 12.6677 10.5919   1
   0 -20  12 92.1802 18.5038  12
   0  20  12 132.407 23.7136   6
   0 -20 -12 116.543 19.2617  10
   0  20  12 110.058 18.9005   9
   0 -20  12 130.886 25.9490   1
   0 -20 -12 95.4288 19.1271   1
   0  20 -12 113.629 19.6714  11
   0 -20  13 10.4941 11.3453  12
   0  20  13 2.35913 9.45018   9
   0 -20 -13-2.55216 10.8391  10
   0 -20 -13 30.0023 13.2377   1
   0 -20  13-4.07081 15.5955   1
   0  20 -13 13.1183 12.4999  11
   0 -20  14 13.5067 12.3403  12
   0  20 -14 21.2890 12.3510  11
   0 -20 -14 20.5961 11.5778  10
   0  20  14 9.48790 11.1922   9
   0 -20 -14 12.4975 11.4280   1
   0 -20  14 21.0180 17.5405   1
   0 -20  15 8.32208 11.9862  12
   0  20  15-3.47893 15.5573   6
   0 -20 -15 10.4204 12.2199  10
   0 -20 -15 2.52027 9.65463   1
   0 -20  15 17.2356 16.8711   1
   0  20 -15-2.69077 11.2041  11
   0 -20 -16 18.4935 12.1446  10
   0 -20 -16 12.7709 10.5827   1
   0  20 -16 48.9657 14.5056  11
   0 -20 -17 32.2339 12.9944  10
   0 -20 -17 26.0576 13.6514   1
   0  21   0 12.0155 10.7570   6
   0  21   0 23.3356 12.3559   9
   0 -21   0-8.81840 13.7936   1
   0  21   0 6.48632 9.68103  11
   0 -21   0 9.86348 11.0373  10
   0  21  -1 2.31452 9.64106   6
   0  21   1 2.49068 10.3737   6
   0  21   1-8.51348 12.2907  11
   0  21  -1 2.20203 9.34769  11
   0 -21   1 14.6651 11.8095  10
   0  21  -1 13.9672 10.0621   9
   0 -21  -1 14.9422 10.9537  10
   0 -21   1 2.99387 12.2250   1
   0 -21  -1 20.6089 12.7223   1
   0 -21   2 68.8349 15.2555  12
   0  21   2 56.5002 15.2371   6
   0  21  -2 78.0262 15.0130   6
   0 -21   2 65.4937 15.9212  10
   0  21  -2 74.0519 15.2094  11
   0  21   2 69.0174 14.7154  11
   0 -21  -2 77.9110 15.6416  10
   0  21  -2 67.3430 15.0875   9
   0 -21   2 58.0184 16.5021   1
   0 -21  -2 75.7746 17.5307   1
   0 -21   3 30.5010 12.1660  12
   0  21   3 50.2178 14.9576   6
   0  21  -3 21.4825 11.0370   6
   0  21  -3 52.6138 13.2595  11
   0 -21   3 16.8818 11.3568  10
   0  21   3 51.3910 12.7529  11
   0  21   3 7.04172 11.2299   9
   0  21  -3 32.4137 12.8721   9
   0 -21   3 9.25010 11.4743   1
   0 -21  -3 34.7053 13.9446   1
   0 -21   4 28.0462 11.6823  12
   0  21   4 48.8924 14.5574   6
   0  21   4 16.1724 10.5662  11
   0  21  -4 21.0081 12.1259  11
   0 -21   4 50.4159 14.0522  10
   0  21   4 21.1808 11.6023   9
   0  21  -4 41.5202 12.4237   9
   0 -21   4 44.4607 15.9401   1
   0 -21  -4 14.5453 13.4256   1
   0 -21   5 30.4676 12.6053  12
   0  21   5 36.4008 14.9863   6
   0 -21   5 28.6908 12.5513  10
   0  21  -5 28.5798 12.8030  11
   0  21   5 21.7708 10.7144  11
   0  21   5 35.4213 11.7872   9
   0 -21  -5 33.5407 12.3104  10
   0  21  -5 20.6698 10.5173   9
   0 -21  -5 46.1916 15.4409   1
   0 -21   5 13.1375 15.7973   1
   0 -21   6 11.7938 11.5568  12
   0  21   6 25.8861 13.0066   6
   0  21  -6 36.4922 13.3164  11
   0 -21   6 47.6703 12.1513  10
   0  21   6 23.7188 10.9551   9
   0 -21  -6 20.7958 12.5256  10
   0  21  -6 41.1185 12.5218   9
   0 -21  -6 23.0914 13.2626   1
   0 -21   6-6.81296 15.3546   1
   0 -21   7 95.7919 17.2958  12
   0  21   7 61.8002 17.7294   6
   0  21  -7 106.722 17.4870  11
   0 -21   7 104.345 17.4765  10
   0 -21  -7 60.1622 15.9007  10
   0  21  -7 79.3672 15.7700   9
   0  21   7 90.5998 16.4430   9
   0 -21  -7 79.7702 18.3071   1
   0 -21   7 69.7764 18.3053   1
   0 -21   8-2.44360 10.5549  12
   0  21   8-15.1268 14.1865   6
   0 -21   8-2.36212 10.2030  10
   0  21   8 7.20046 10.5507   9
   0  21  -8 2.24832 9.35821   9
   0 -21  -8-2.62888 11.3552  10
   0 -21   8-10.8743 13.2323   1
   0 -21  -8 16.9500 14.5843   1
   0 -21   9 9.98806 12.0685  12
   0  21   9 21.7858 13.2098   6
   0 -21   9 25.8150 12.1256  10
   0  21  -9 8.90485 10.6075   9
   0 -21  -9 10.5559 11.6107  10
   0  21   9-2.41705 10.8177   9
   0 -21  -9-5.58115 11.8464   1
   0 -21   9-3.76422 15.0608   1
   0 -21  10-5.09214 12.2953  12
   0  21  10 3.20312 13.3320   6
   0 -21  10 6.96561 11.9868  10
   0  21 -10-2.62653 11.1404  11
   0  21 -10 22.0046 10.3183   9
   0  21  10-4.87641 11.7744   9
   0 -21 -10-15.9031 14.3513  10
   0 -21  10-7.72841 15.4525   1
   0 -21 -10 13.7036 11.8380   1
   0 -21  11 5.21993 10.4370  12
   0  21  11-6.55764 12.5535   6
   0 -21  11-2.29013 10.5748  10
   0  21 -11-5.33882 12.3261  11
   0 -21 -11-10.6397 11.2820  10
   0  21 -11 10.8456 9.02835   9
   0  21  11 4.91650 10.0330   9
   0 -21  11 4.00952 15.3510   1
   0 -21 -11 8.12670 11.4897   1
   0 -21  12 13.3879 12.7322  12
   0  21  12 64.0448 16.8695   6
   0  21 -12 8.14151 11.9110  11
   0  21  12 34.7029 13.5869   9
   0 -21 -12 24.0572 12.1363  10
   0 -21 -12 34.9039 12.7662   1
   0 -21  12 29.0611 18.0561   1
   0 -21  13-8.21772 11.4047  12
   0  21  13 17.2403 14.0756   6
   0  21  13-12.4880 11.7149   9
   0 -21 -13-2.68932 12.9901  10
   0 -21 -13 2.67359 11.1315   1
   0 -21  13 4.25508 14.7386   1
   0  21 -13-8.25254 12.0953  11
   0 -21  14 95.7468 20.1662  12
   0 -21 -14 108.368 19.4063  10
   0  21  14 103.002 18.6024   9
   0 -21 -14 114.997 20.5218   1
   0  21 -14 100.397 19.8740  11
   0 -21 -15 5.47330 10.9570  10
   0 -21 -15 8.06234 10.3036   1
   0 -21 -16-5.54142 12.8013  10
   0  22   0 234.001 29.4727   6
   0 -22   0 240.673 29.7594  10
   0  22   0 244.324 28.7799  11
   0  22   0 187.889 27.8973   9
   0 -22   0 274.336 33.0713   1
   0 -22   1 5.09444 10.8996  12
   0  22   1 34.1809 12.3902   6
   0  22  -1 71.2834 13.9967   6
   0 -22  -1 52.8277 15.1397  10
   0  22   1 62.8846 14.8017  11
   0 -22   1 31.1199 13.6193  10
   0  22  -1 39.4885 13.1340  11
   0  22  -1 59.1984 15.0192   9
   0 -22   1 38.5443 16.2810   1
   0 -22  -1 58.9545 16.9283   1
   0 -22   2-2.50252 9.80306  12
   0  22   2 5.41275 11.2700   6
   0  22  -2-2.37107 10.4287   6
   0  22   2 13.2810 10.3855  11
   0 -22   2-5.14762 11.5127  10
   0  22  -2 7.09688 11.4294  11
   0 -22  -2-8.00271 11.1086  10
   0  22  -2-19.6933 12.7134   9
   0 -22  -2-12.4338 12.4354   1
   0 -22   2-3.23072 13.4515   1
   0 -22   3 44.6039 13.9368  12
   0  22   3 50.0257 15.7118   6
   0 -22   3 38.3587 13.2552  10
   0  22  -3 36.1452 12.0638  11
   0  22   3 34.8361 12.4667  11
   0  22  -3 34.3606 13.5170   9
   0  22   3 54.6672 14.4084   9
   0 -22  -3 33.8303 15.3950   1
   0 -22   3 39.7247 16.7418   1
   0 -22   4 41.9198 13.0293  12
   0  22   4 34.2053 14.3752   6
   0  22   4 27.8444 12.3436  11
   0  22  -4 49.1298 14.1678  11
   0 -22   4 78.8064 15.9024  10
   0  22  -4 48.9222 14.5290   9
   0  22   4 44.8290 13.6137   9
   0 -22   4 34.0823 15.6188   1
   0 -22  -4 40.1031 16.4840   1
   0 -22   5 34.5980 13.1010  12
   0  22   5 38.0047 15.7491   6
   0 -22   5 37.9623 14.1743  10
   0  22   5 27.2883 11.7492  11
   0  22  -5 22.5434 13.4263  11
   0  22   5 42.4699 14.2939   9
   0  22  -5 38.9632 13.3706   9
   0 -22  -5 41.0365 13.9061  10
   0 -22  -5 61.0506 16.2301   1
   0 -22   5 48.5780 17.4839   1
   0 -22   6 179.252 25.1562  12
   0  22   6 194.880 27.5742   6
   0  22  -6 227.349 27.2482  11
   0 -22   6 189.056 25.2865  10
   0 -22  -6 167.849 25.3422  10
   0  22   6 193.166 25.0369   9
   0  22  -6 150.202 23.9757   9
   0 -22   6 118.565 26.4990   1
   0 -22  -6 219.629 28.6935   1
   0 -22   7 12.5957 11.2631  12
   0  22   7-6.15282 13.2881   6
   0  22  -7 7.82556 12.7758  11
   0 -22   7 7.53190 13.5941  10
   0  22  -7 4.80990 9.41497   9
   0 -22  -7-16.5924 13.3546  10
   0  22   7 2.52113 11.0825   9
   0 -22  -7 15.1878 14.2437   1
   0 -22   7-3.72381 14.8913   1
   0 -22   8 7.69496 11.2935  12
   0  22   8 9.47944 14.3752   6
   0 -22   8 9.99456 11.1898  10
   0  22   8 38.0486 13.1111   9
   0 -22  -8 8.33193 12.6388  10
   0  22  -8-7.15558 10.5046   9
   0 -22   8 11.4356 14.9363   1
   0 -22  -8 8.96330 12.4524   1
   0 -22   9 18.3302 11.3160  12
   0  22   9 6.49223 13.2532   6
   0 -22   9 12.3918 10.8999  10
   0  22   9-2.55477 10.4329   9
   0  22  -9-2.36184 10.3880   9
   0 -22  -9 16.7232 13.8434  10
   0 -22  -9 14.7897 12.7811   1
   0 -22   9-15.8032 17.6671   1
   0 -22  10 34.6423 14.4605  12
   0  22  10 39.8493 16.5801   6
   0  22 -10 52.3655 14.7612  11
   0 -22  10 34.3571 12.7621  10
   0  22 -10 30.3512 12.6211   9
   0 -22 -10 44.7204 14.4286  10
   0  22  10 54.0729 14.4630   9
   0 -22  10 44.5529 18.9778   1
   0 -22 -10 38.0195 15.2527   1
   0 -22  11 95.4805 19.2031  12
   0  22  11 129.711 23.5665   6
   0 -22 -11 106.481 19.8967  10
   0  22 -11 85.1696 17.8030   9
   0  22  11 96.0643 19.0452   9
   0 -22  11 79.7033 23.8842   1
   0 -22 -11 115.713 20.1596   1
   0  22 -11 123.202 20.6576  11
   0 -22  12-2.79331 10.7020  12
   0 -22 -12-5.62372 12.1518  10
   0  22  12-2.61856 11.1136   9
   0 -22  12-4.33656 16.6079   1
   0 -22 -12-8.60173 13.2455   1
   0  22  13 97.5990 18.1529   9
   0 -22 -13 87.5867 18.7056  10
   0 -22 -13 74.1197 17.8176   1
   0  22  14 10.6142 12.4637   9
   0 -22 -14 56.9506 15.4118   1
   0  23   0-5.37362 11.1830   6
   0 -23   0 19.3742 12.1663  10
   0  23   0-2.40505 10.0103  11
   0  23   0-5.22518 11.4843   9
   0 -23   0-3.37350 12.9160   1
   0 -23   1-13.3694 13.0995  12
   0  23  -1 26.0255 13.0994   6
   0  23   1 2.76977 12.3874   6
   0 -23   1-8.23731 13.0726  10
   0 -23  -1-5.58776 10.7014  10
   0  23   1-2.36803 10.9390  11
   0  23  -1-4.88992 10.1812  11
   0  23  -1-10.4293 11.0634   9
   0 -23  -1 3.31121 13.5178   1
   0 -23   1-10.1652 13.8329   1
   0 -23   2 7.90314 10.9651  12
   0  23  -2-15.0876 12.4857   6
   0  23   2 2.84628 11.8470   6
   0 -23  -2 8.46183 11.7402  10
   0 -23   2 8.17410 12.9688  10
   0  23  -2 19.9032 12.0147  11
   0  23   2-4.67056 11.2777  11
   0  23  -2-18.2191 13.6039   9
   0 -23   2 6.91654 14.6684   1
   0 -23  -2-6.61888 14.2947   1
   0 -23   3-2.60820 10.6449  12
   0  23   3-5.83443 12.3732   6
   0  23  -3-7.59696 11.8743  11
   0  23   3-2.29782 10.2733  11
   0 -23   3-8.11767 11.2624  10
   0  23   3 15.7415 12.3023   9
   0  23  -3 7.78584 11.4082   9
   0 -23  -3-2.84478 14.1248  10
   0 -23   3 21.2749 14.4717   1
   0 -23  -3 3.26195 13.5768   1
   0 -23   4 41.6167 15.2483  12
   0  23   4 47.7926 15.7020   6
   0  23   4 51.9654 13.5612  11
   0  23  -4 69.6549 15.7100  11
   0 -23   4 69.9368 16.0272  10
   0  23  -4 54.3101 15.1690   9
   0  23   4 60.4625 14.9414   9
   0 -23   4 82.7572 19.5691   1
   0 -23  -4 48.9426 17.2421   1
   0 -23   5 36.4611 14.6693  12
   0  23   5 24.4522 14.0306   6
   0 -23   5 64.2106 16.5494  10
   0  23  -5 47.3231 14.3234  11
   0  23  -5 69.5530 15.5511   9
   0 -23  -5 34.6631 13.9371  10
   0  23   5 55.3622 14.1976   9
   0 -23  -5 87.9945 19.6047   1
   0 -23   5 77.9333 19.5805   1
   0 -23   6-2.61736 10.6828  12
   0  23   6 12.5255 12.7805   6
   0 -23   6 2.66267 12.1016  10
   0  23  -6-2.67887 11.5712  11
   0  23  -6 15.3578 11.4442   9
   0  23   6 2.64521 9.89516   9
   0 -23  -6 2.90779 12.3336  10
   0 -23  -6-3.21100 13.6196   1
   0 -23   6-15.1380 13.1066   1
   0 -23   7-5.31245 11.0567  12
   0  23   7-3.20827 13.3542   6
   0  23  -7-10.9166 14.0902  11
   0 -23   7 2.64680 11.6357  10
   0  23   7 15.9446 11.8821   9
   0  23  -7 5.08267 10.1637   9
   0 -23  -7-2.92011 12.6137  10
   0 -23  -7-12.7841 16.2927   1
   0 -23   7-7.82925 16.6044   1
   0 -23   8-2.68919 10.0611  12
   0  23   8 3.29175 12.6044   6
   0  23  -8 11.1348 12.4471  11
   0 -23   8-5.26406 11.9636  10
   0 -23  -8 2.92626 11.4570  10
   0  23  -8 12.5993 11.0784   9
   0  23   8-2.67326 13.6286   9
   0 -23   8-4.04916 15.8524   1
   0 -23  -8 9.51756 12.6880   1
   0 -23   9 109.646 20.6176  12
   0  23   9 124.944 24.0485   6
   0  23   9 123.842 21.4909   9
   0  23  -9 104.797 19.7495   9
   0 -23  -9 140.817 22.7658  10
   0 -23  -9 162.062 24.4538   1
   0 -23   9 115.948 25.0047   1
   0 -23   9 141.032 21.5232  10
   0 -23  10 67.1173 16.8136  12
   0 -23  10 67.1823 15.4964  10
   0 -23 -10 94.0124 18.5527  10
   0  23 -10 71.5349 15.1300   9
   0  23  10 40.6896 15.2636   9
   0 -23  10 81.3794 23.6638   1
   0 -23 -10 27.7837 13.9140   1
   0  23  11 158.613 22.8944   9
   0 -23 -11 119.236 22.5094   1
   0 -23 -12 78.9068 19.7214   1
   0 -24   0 193.998 29.5112  12
   0  24   0 215.149 29.4561   6
   0 -24   0 222.070 30.4422  10
   0  24   0 222.181 28.6708  11
   0  24   0 231.345 29.5520   9
   0 -24   0 269.634 34.3820   1
   0 -24   1 11.2050 12.5535  12
   0  24  -1 21.9906 12.1136   6
   0  24   1 17.4726 13.4741   6
   0 -24  -1-2.94627 13.8421  10
   0  24   1 7.46462 10.7816  11
   0  24  -1 25.6451 12.9327  11
   0 -24   1 2.89617 13.1905  10
   0  24   1 33.0854 12.9569   9
   0  24  -1 8.24767 11.6923   9
   0 -24   1 3.61411 15.6340   1
   0 -24  -1 3.52551 15.2519   1
   0 -24   2 41.4546 14.8685  12
   0  24   2 74.6088 18.6586   6
   0  24  -2 50.6011 14.8813   6
   0 -24   2 74.7134 18.0221  10
   0  24   2 90.7160 16.6138  11
   0 -24  -2 71.3914 18.1211  10
   0  24  -2 80.8155 16.4991  11
   0  24  -2 65.8669 16.2347   9
   0 -24   2 73.8792 20.6817   1
   0 -24  -2 56.1812 18.2112   1
   0 -24   3-8.22819 11.8467  12
   0  24   3 33.6082 14.5421   6
   0  24  -3-13.2658 12.9942  11
   0 -24   3-5.70038 12.7429  10
   0 -24  -3-3.00170 12.0035  10
   0  24   3 2.41871 11.3417  11
   0  24  -3-5.47276 12.6353   9
   0  24   3-2.76370 9.83342   9
   0 -24  -3 20.6844 16.4084   1
   0 -24   3 3.73555 14.6236   1
   0 -24   4-13.6759 11.8148  12
   0  24   4 18.7413 13.4921   6
   0  24  -4 8.09992 11.6627  11
   0  24   4 4.75935 11.1593  11
   0 -24   4 22.6527 14.0599  10
   0  24   4-2.76831 10.8378   9
   0  24  -4-2.72437 11.1198   9
   0 -24  -4 17.1995 13.7563   1
   0 -24   4-11.5291 15.6852   1
   0 -24   5 49.2266 15.9087  12
   0  24   5 70.1811 18.1871   6
   0 -24   5 33.7755 14.8139  10
   0  24  -5 46.7542 15.6735  11
   0  24  -5 51.5473 15.4777   9
   0  24   5 55.4835 15.9609   9
   0 -24  -5 88.2998 18.7733  10
   0 -24  -5 65.1338 20.2578   1
   0 -24   5 54.6702 19.6123   1
   0 -24   6 5.51610 11.9746  12
   0  24   6 13.0436 13.0964   6
   0 -24   6 28.0026 13.9567  10
   0  24  -6-2.80064 14.8652  11
   0  24  -6 18.8722 13.6202   9
   0  24   6 38.9781 14.9519   9
   0 -24   6 12.0928 14.3935   1
   0 -24  -6 30.3178 16.3128   1
   0 -24   7 44.5222 15.5717  12
   0  24   7 90.1201 19.9802   6
   0  24  -7 45.4935 15.3414   9
   0 -24  -7 66.9685 17.8733   1
   0 -24   7 57.5310 21.4347   1
   0 -24   7 55.7175 15.7533  10
   0 -24   8 8.47939 13.0519  12
   0 -24   8 8.30147 11.7375  10
   0 -24  -8 3.32349 13.8335   1
   0  24  -8-7.97441 13.5507   9
   0 -24   9 32.9142 14.6448  10
   0  24  -9 52.6408 14.5755   9
   0 -24  -9 59.3400 17.2155   1
   0  24 -10 41.6196 12.6358   9
   0  25   0-2.64332 11.0248  11
   0  25   0 17.8602 13.5471   6
   0 -25   0 7.63002 16.1967   1
   0 -25   0 17.8257 13.0788  12
   0  25  -1-8.05000 12.9587  11
   0  25   1 7.81889 11.4573  11
   0  25   1-6.10822 12.7123   6
   0 -25   1-3.84135 14.7076   1
   0 -25  -1-3.74025 14.6424   1
   0 -25   1 8.77803 13.2987  12
   0  25  -2 2.72567 10.9012  11
   0  25   2 10.2820 10.2809  11
   0  25   2 3.12518 11.4099   6
   0 -25  -2-3.71760 14.2346   1
   0 -25   2 3.87838 15.1838   1
   0 -25   2-5.78803 13.3645  12
   0  25   3 2.53880 10.1818  11
   0 -25   3 15.9277 17.5206   1
   0 -25  -3 21.8278 15.4497   1
   0  25   3 19.1468 13.8051   6
   0 -25   3 2.87700 13.5128  12
   0 -25  -4 7.23346 14.7940   1
   0  25   4 32.5710 15.3046   6
   0 -25   4 2.86573 12.4171  12
   0 -25  -5 3.59631 12.8108   1
   0 -25   5-14.3626 14.6561  12
  -1   0  26 436.097 44.6140  12
  -1   0  26 380.569 45.9069  13
   1   0 -26 384.804 50.3043   7
   1   0 -26 438.095 51.7761   5
  -1   0  25 18.0562 11.7595  12
  -1   0  25 9.42552 12.5978  13
   1   0 -25 12.0590 15.0644   7
   1   0 -25 4.17383 14.8794   5
  -1   0  24 176.357 23.4230  12
  -1   0  24 154.797 24.8062  13
   1   0 -24 143.242 27.6456   7
   1   0 -24 130.888 26.7377   5
  -1   0  23 6.97452 9.67662  12
  -1   0  23 8.47448 11.5293  13
   1   0 -23-3.52293 14.3784   7
   1   0 -23-15.0273 16.2269   5
  -1   0  22 311.885 35.0142  13
  -1   0  22 294.533 32.6450  12
   1   0 -22 288.796 37.1995   7
   1   0 -22 276.790 37.7517   5
  -1   0  21-2.50994 11.7698  13
  -1   0  21 2.07409 8.46563  12
   1   0 -21 12.4016 13.3919   7
   1   0 -21-16.7125 15.6736   5
  -1   0  20 46.8319 12.3402  12
   1   0 -20 43.0889 15.7848   7
   1   0 -20 43.8240 16.3513   5
  -1   0  19-5.51084 8.22159  12
   1   0 -19-2.65418 10.6206   7
   1   0 -19-8.79189 14.7513   5
  -1   0  19-1.61872 6.61752   6
  -1   0  18 140.981 18.9388  12
   1   0 -18 151.571 22.4151   7
   1   0 -18 144.919 23.2075   5
  -1   0  18 158.510 18.8879   6
  -1   0  17-1.60406 7.17210  12
   1   0 -17 2.24383 9.69213   7
  -1   0  17-1.42828 6.79862   6
   1   0 -17 12.7052 10.5766   5
  -1   0  16 14.9227 7.81929  12
   1   0 -16 4.09959 9.18115   7
  -1   0  16 1.32642 6.78427   6
   1   0 -16 14.1098 10.8729   5
   1   0 -15 0.88956 2.16826  11
  -1   0  15 1.38280 6.18354  12
   1   0 -15 7.46308 7.91450   7
  -1   0  15 7.37497 6.34674   6
   1   0 -15-6.49875 9.01710   5
   1   0 -14 1901.58 150.583  11
  -1   0  14 1807.44 154.087   6
   1   0 -14 1831.29 157.758   5
  -1   0  14 1928.80 154.951  12
   1   0 -14 1874.73 156.670   7
  -1   0  13-4.70439 5.17023  12
   1   0 -13-0.28220 1.99595  11
   1   0 -13-0.26102 1.98841   4
   1   0 -13-7.24096 8.22741   5
  -1   0  13-4.13423 5.13220   6
   1   0 -13 2.11203 2.16212  11
   1   0 -13-2.00717 2.18411  10
   1   0 -13-2.96106 4.96693   2
   1   0 -13 1.52543 7.04399   7
  -1   0  12 73.0351 9.95527  12
   1   0 -12 69.8148 6.65693  11
   1   0 -12 62.3597 6.37100  11
   1   0 -12 62.7574 6.38261   4
  -1   0  12 50.6531 8.96820   6
   1   0 -12 55.6994 11.5157   5
   1   0 -12 58.0085 6.24500  10
   1   0 -12 82.1174 12.1503   7
   1   0 -12 77.3401 9.57080   2
   1   0 -11 1.84416 2.06292   4
   1   0 -11 2.45063 4.42311   2
  -1   0  11-2.92104 5.27211  12
   1   0 -11 2.13047 2.15220  11
   1   0 -11 5.88173 6.46372   5
  -1   0  11-1.68692 5.01237   6
   1   0 -11-1.72696 2.24147  11
   1   0 -11 0.70836 1.81858  10
   1   0 -11-0.52633 2.68321   8
   1   0 -11-3.65839 6.60287   7
  -1   0  11 1.41289 2.90258   8
   1   0 -10 251.832 23.0064   2
  -1   0  10 250.201 23.5937  12
   1   0 -10 231.884 20.6515  11
   1   0 -10 254.198 20.8482  11
   1   0 -10 249.154 20.7255   4
   1   0 -10 255.167 25.8701   5
  -1   0  10 245.759 22.9898   6
   1   0 -10 255.449 20.5185  10
  -1   0  10 228.009 21.4060   8
   1   0 -10 240.002 21.6801   8
   1   0 -10 277.245 25.0046   7
   1   0  -9-1.98950 4.33063   2
   1   0  -9 0.24989 1.97773   4
  -1   0   9 0.23852 1.93734   4
  -1   0   9 1.55587 4.25977  12
   1   0  -9-0.71682 1.85041  11
   1   0  -9-2.29835 6.89314   5
  -1   0   9 2.64633 4.25224   6
   1   0  -9 1.27852 2.13887  11
   1   0  -9-1.61866 1.73096  10
   1   0  -9 0.44783 2.58494   8
  -1   0   9 0.41008 2.82057   8
   1   0  -9-1.89104 5.67157   7
  -1   0   8 239.371 20.7578   4
  -1   0   8 226.935 22.0394   2
   1   0  -8 271.017 22.6002   2
  -1   0   8 234.062 22.7776  12
   1   0  -8 248.783 20.7530  11
   1   0  -8 253.716 20.8451   4
  -1   0   8 230.679 22.2783   6
   1   0  -8 270.689 24.8024   5
   1   0  -8 261.299 20.8755  11
   1   0  -8 243.322 20.3940  10
   1   0  -8 259.073 21.6160   8
  -1   0   8 253.204 21.4963   8
   1   0  -8 261.970 23.6327   7
  -1   0   7 0.22098 1.98440   4
   1   0  -7 3.64075 3.34303   2
   1   0  -7 3.49412 4.27832   3
   1   0  -7-0.22535 2.04856   4
  -1   0   7 1.43513 3.42662   2
  -1   0   7 0.58821 4.04581  12
  -1   0   7-2.15623 4.90867  13
   1   0  -7-0.40989 2.00770  11
   1   0  -7-4.96696 4.22604  12
   1   0  -7-2.53830 5.94123   5
  -1   0   7 0.97630 4.12184   6
   1   0  -7 0.96795 1.28809  10
   1   0  -7 0.63833 2.04053  11
   1   0  -7-0.73888 2.37471   8
  -1   0   7 3.10299 2.71420   8
   1   0  -7-0.69121 4.33388   7
  -1   0   6 2142.32 171.079   3
   1   0  -6 2253.27 170.820   2
   1   0  -6 2071.79 170.820   3
  -1   0   6 2115.47 169.574   4
  -1   0   6 2097.31 170.482   2
  -1   0   6 2089.99 171.274  13
  -1   0   6 2165.25 170.896  12
   1   0  -6 2055.44 170.647  12
   1   0  -6 2191.51 169.515  11
  -1   0   6 1995.20 170.354   6
   1   0  -6 2048.96 171.644   5
   1   0  -6 2155.49 169.598   4
   1   0  -6 2179.18 169.541  11
   1   0  -6 2107.89 170.120   8
  -1   0   6 2106.73 170.028   8
   1   0  -6 2114.11 171.183   7
  -1   0   5 0.45537 3.96873   3
   1   0  -5-0.38893 1.94415   4
  -1   0   5 0.57813 1.92658   4
   1   0  -5 4.60650 3.34562   2
  -1   0   5-0.50277 4.30429  13
  -1   0   5 2.00951 3.34558  12
   1   0  -5-4.19379 3.54829  12
   1   0  -5 1.18201 1.80770  11
  -1   0   5 3.94299 3.51114   2
  -1   0   5-0.96258 3.33356   6
   1   0  -5 0.46769 3.51964   7
   1   0  -5-1.45538 2.31582   8
  -1   0   5-1.10316 2.71080   8
   1   0  -4 3.01753 3.74482  13
  -1   0   4 5.93606 3.62119  13
  -1   0   4 7.45275 3.20958  12
  -1   0   4 7.89872 2.15095  11
   1   0  -4 5.62395 2.95685  12
   1   0  -4 4.69812 1.86871  11
  -1   0   4 8.61846 3.15108   2
   1   0  -4 5.98753 2.73195   6
  -1   0   4 7.85846 2.81261   6
   1   0  -4 5.69313 2.07011   4
  -1   0   4 8.06915 3.25366   3
   1   0  -4 6.95340 3.07630   2
  -1   0   4 8.44199 2.29924   4
  -1   0   4 9.11597 2.73626   8
   1   0  -4 5.52378 2.37800   8
   1   0  -3 0.28009 2.60705  13
  -1   0   3-0.58423 2.53501  13
   1   0  -3 0.21253 1.95547  12
  -1   0   3 0.42510 1.61569  11
   1   0  -3-0.13557 1.50572  11
  -1   0   3-0.66443 2.12411  12
  -1   0   3-0.46934 2.00030   2
  -1   0   3 1.44832 1.82059   6
   1   0  -3 0.84115 1.78562   6
   1   0  -3-0.42246 1.81699   8
  -1   0   3 1.62812 2.01453   8
   1   0  -3 0.80650 1.47848   4
  -1   0   3 2.69917 1.73927   4
  -1   0   2 3691.54 252.211   4
  -1   0   2 3549.15 252.298   8
   1   0  -2 3647.77 252.441  13
  -1   0   2 3662.10 252.444  13
  -1   0   2 3716.93 252.183  12
   1   0  -2 3546.64 252.136  12
  -1   0   2 3540.11 252.102  11
   1   0  -2 3675.37 252.109  11
  -1   0   1-2.39008 2.85603   7
  -1   0   1 0.85206 0.98400  11
   1   0   0 3.87414 1.01085   4
  -1   0  -1-0.52214 0.95901  11
   1   0   1 0.12814 1.26824  11
  -1   0  -1-0.72069 1.36707  12
   1   0   1 0.43469 0.91620  12
  -1   0  -1-0.32334 2.76817   7
  -1   0  -2 7.30441 1.67606  11
   1   0   2 7.47531 1.89340  11
  -1   0  -2 8.96835 3.92526   5
  -1   0  -2 12.5479 2.16666  10
   1   0   2 7.91993 2.06574  10
  -1   0  -2 5.74739 2.33566  12
  -1   0  -2 4.34555 2.39094  13
   1   0   2 5.78118 2.31028  12
   1   0   2 6.94597 2.25032  13
  -1   0  -2 7.69689 3.75849   7
   1   0   3 1.29405 1.74772  11
  -1   0  -3-0.49173 1.86931  11
  -1   0  -3 8.36163 4.99339   5
   1   0   3 0.50610 4.44975   5
   1   0   3 1.64431 2.25328  10
  -1   0  -3-0.22760 2.25332  10
   1   0   3-0.66812 2.98772  13
  -1   0  -3 2.95942 3.34221  13
  -1   0  -3 0.31732 3.08711  12
  -1   0  -3 0.48999 4.50776   7
   1   0   4 5689.85 458.696  11
  -1   0  -4 5851.85 458.716  11
   1   0   4 5727.29 460.572   5
  -1   0  -4 5842.27 460.749   5
   1   0   4 5845.59 459.098  10
  -1   0  -4 5799.75 459.059  10
  -1   0  -4 6013.88 459.835  13
   1   0   4 5843.24 459.822  13
  -1   0  -4 5717.17 459.640  12
  -1   0  -4 5314.65 460.294   7
  -1   0  -5 0.52672 4.21269  13
   1   0   5-1.62158 4.16253  13
  -1   0  -5-2.95726 3.53048  12
  -1   0  -5-1.63488 2.02961  11
   1   0   5 1.24360 2.07233  11
  -1   0  -5 1.55733 6.38777   5
   1   0   5-1.45949 6.60635   5
  -1   0  -5 2.36889 2.64795  10
   1   0   5-1.85672 2.62525  10
  -1   0  -5-2.85655 5.77077   7
   1   0   5 0.31815 2.59712   2
   1   0   6 338.118 30.0303   2
   1   0   6 338.599 31.1233  13
  -1   0  -6 344.790 31.0578  13
   1   0   6 365.759 29.4234  11
  -1   0  -6 361.092 29.3661  11
  -1   0  -6 359.730 32.7104   5
   1   0   6 351.591 32.2193   5
   1   0   6 381.294 29.9999  10
  -1   0  -6 365.488 29.8860  10
   1   0   6 355.855 28.9443   8
  -1   0  -6 336.604 32.1964   7
   1   0   7-1.28849 3.07664   2
   1   0   7 2.25767 4.47227  13
  -1   0  -7-0.24731 2.09828  11
  -1   0  -7-1.05782 6.40377   5
  -1   0  -7 0.36276 2.68167  10
   1   0   7-0.26462 2.26579  11
   1   0   7-1.53490 3.00460  10
   1   0   7-0.22855 1.92115   9
   1   0   7-0.99887 1.71400   8
   1   0   8 1.95722 3.20247   2
   1   0   8 3.45659 4.78893  13
  -1   0  -8 2.94696 2.14230  11
  -1   0  -8 6.01223 7.34816   5
   1   0   8 3.20472 2.49213  11
  -1   0  -8 3.95382 2.85846  10
   1   0   8 0.42124 2.90529  10
   1   0   8 2.66401 2.15818   9
   1   0   8 2.73584 1.64863   8
   1   0   9-1.10187 3.59768   2
   1   0   9-3.89176 4.56222  13
  -1   0  -9-1.14844 2.30818  11
  -1   0  -9-2.70332 6.97800   5
  -1   0  -9 1.28440 2.79578  10
   1   0   9-0.45906 3.02104  10
   1   0   9 1.87956 2.62020  11
   1   0   9 0.76685 2.11759   9
   1   0   9 0.66854 1.79155   8
  -1   0 -10 3752.90 289.668  11
  -1   0 -10 3524.81 294.725   5
  -1   0 -10 3600.95 290.285  10
   1   0  10 3852.75 289.838  11
   1   0  10 3743.71 290.565  10
   1   0  10 3481.84 289.361   8
   1   0  10 3465.59 289.338   9
   1   0  10 3764.56 289.533   9
   1   0  10 3501.04 292.908  13
   1   0  11-1.20082 6.19990  13
  -1   0 -11 3.18788 2.32915  11
  -1   0 -11-3.32858 8.15152   5
  -1   0 -11 0.49285 2.75946  10
   1   0  11 0.68815 2.19538  11
   1   0  11 0.53700 3.31055  10
   1   0  11 0.99835 1.74295   9
   1   0  11 1.65982 2.14407   9
   1   0  11 1.09025 1.94161   8
   1   0  12 67.0426 10.4855  13
  -1   0 -12 51.1574 5.83256  11
  -1   0 -12 65.7995 12.9216   5
   1   0  12 55.9858 7.13481  10
   1   0  12 49.3046 5.96002  11
   1   0  12 54.0778 5.56727   9
   1   0  12 63.6232 5.81046   9
   1   0  12 44.5265 5.55598   8
  -1   0 -13-1.34605 2.31480  11
  -1   0 -13 3.98121 7.79267   5
   1   0  13-3.70706 3.53045  10
   1   0  13 0.26856 1.96107   9
   1   0  13 12.9388 6.63842  13
   1   0  14 606.341 49.9662  10
  -1   0 -14 653.370 57.1817   5
  -1   0 -14 604.289 48.5200  11
   1   0  14 600.522 53.8559  13
   1   0  14 493.925 52.0382  12
   1   0  15-0.70123 3.84407  10
   1   0  15-3.37147 7.28345  13
   1   0  15-4.44395 7.25721  12
  -1   0 -15-7.02356 10.6417   5
   1   0  16 1365.84 118.281  12
   1   0  16 1391.14 119.116  13
  -1   0 -16 1296.07 121.468   5
   1   0  16 1556.03 119.705   6
   1   0  17 3.89439 8.10905  13
   1   0  17 3.40472 7.22555  12
  -1   0 -17 16.2277 13.4316   5
   1   0  17-1.86916 8.22079   6
   1   0  18-2.08771 9.33864  13
   1   0  18 14.5498 9.27587  12
  -1   0 -18 14.4371 12.6958   5
   1   0  18-1.99713 9.36945   6
   1   0  19-4.46253 9.63834  13
   1   0  19 1.93444 8.05250  12
  -1   0 -19 3.08541 13.7951   5
   1   0  19 10.6105 9.32910   6
   1   0  20 33.2098 11.8135  13
   1   0  20 24.6835 10.5694  12
   1   0  20 22.4123 11.7669   6
  -1   0 -20 29.5090 15.7520   5
   1   0  21-8.72717 9.08178  12
   1   0  21 2.52392 10.5057  13
  -1   0 -21 13.9086 14.1919   5
   1   0  22 16.0838 11.5863  13
   1   0  22 4.61206 9.42147  12
  -1   0 -22-7.37818 14.7585   5
   1   0  23-11.3302 12.8822  13
   1   0  23-2.43624 10.5337  12
  -1   0 -23-3.89605 13.8705   5
   1   0  24 12.8387 11.8602  12
   1   0  24-8.99209 11.2158  13
  -1   0 -24 28.7622 18.0640   5
   1   0  25-3.16391 12.9130  13
   1   0  25 2.70124 11.0247  12
  -1   0 -25 4.33218 17.3239   5
  -1   0 -26 72.8301 23.0289   5
   1  -1 -27 26.2968 12.7914   1
   1  -1 -26 57.8788 17.3196   1
   1  -1 -26 48.6267 21.5475   5
   1   1 -26 47.7698 22.3404   5
   1  -1 -26 47.7725 21.4813   7
   1   1 -26 58.9298 22.2218   7
  -1   1  26 82.6923 19.2745  13
  -1  -1  26 79.8058 17.4403  12
  -1   1  26 53.4313 14.7164  12
  -1  -1  26 46.6033 16.9526  13
   1  -1 -25 33.7284 19.6553   5
   1   1 -25 28.9450 18.0646   5
   1  -1 -25 40.8217 18.1476   7
  -1  -1  25 36.7542 13.6543  12
  -1  -1  25 6.33266 13.9421  13
  -1   1  25 45.7418 13.2344  12
  -1   1  25 50.1872 16.2176  13
   1  -1 -24 56.1186 18.6434   5
   1   1 -24 51.0518 19.8969   5
   1  -1 -24 45.9317 17.8412   7
  -1   1  24 50.6410 14.6048  12
  -1  -1  24 57.4491 15.2268  12
  -1   1  24 65.2852 17.2433  13
  -1  -1  24 33.0596 13.5723  13
   1  -1 -23 322.075 39.3702   5
   1   1 -23 241.648 36.9140   5
   1  -1 -23 247.121 36.6304   7
  -1  -1  23 312.965 32.6594  12
  -1  -1  23 281.716 33.8765  13
  -1   1  23 235.422 32.2271  13
  -1   1  23 292.319 32.0027  12
   1  -1 -22 100.294 21.7427   5
   1   1 -22 98.2546 21.5267   5
   1  -1 -22 74.6425 20.1226   7
  -1  -1  22 87.5283 15.6474  12
  -1  -1  22 53.7590 16.0688  13
  -1   1  22 66.9491 14.9406  12
   1  -1 -21 27.0057 14.9287   5
   1   1 -21 42.9359 17.5574   5
   1  -1 -21 28.3833 15.5631   7
  -1  -1  21 53.2246 13.6291  13
  -1  -1  21 42.3893 11.7887  12
  -1   1  21 42.7693 11.7218  12
   1  -1 -20 101.548 21.7199   5
   1   1 -20 111.555 20.8367   5
   1  -1 -20 108.092 20.2827   7
  -1  -1  20 109.827 17.2931  12
  -1   1  20 116.815 17.0559  12
  -1  -1  20 107.270 18.1536  13
   1  -1 -19 23.7916 13.7848   5
  -1   1  19 13.4278 8.42023   6
   1   1 -19 5.79879 12.5809   5
   1  -1 -19 13.4945 11.0806   7
  -1  -1  19 17.9836 10.2870  13
  -1   1  19 12.5977 7.86580  12
  -1  -1  19 20.6429 9.01263  12
  -1   1  18 1.58296 7.42776   6
  -1  -1  18-1.46900 7.09932   6
   1  -1 -18 11.1079 10.8744   5
   1   1 -18 8.10631 11.8809   5
   1  -1 -18 14.9112 11.8318   7
  -1  -1  18 4.20785 9.25239  13
  -1  -1  18 8.82902 8.02992  12
  -1   1  18-1.68409 7.01485  12
   1   1 -17 85.2660 17.4067   5
   1  -1 -17 87.8747 18.5547   5
  -1   1  17 108.549 15.0322   6
  -1  -1  17 104.052 14.4295   6
   1  -1 -17 132.114 19.3023   7
  -1   1  17 103.643 14.7040  12
  -1  -1  17 108.970 15.4617  12
   1   1 -16 199.331 25.3503   5
  -1  -1  16 192.157 20.8209   6
   1  -1 -16 210.190 25.7053   5
  -1   1  16 175.800 20.9608   6
  -1  -1  16 169.257 21.4684  12
  -1   1  16 197.658 21.5859  12
   1  -1 -16 209.734 24.9431   7
   1   1 -15 37.2476 5.37137  11
  -1   1  15 44.7211 9.38688  12
  -1  -1  15 40.0188 9.63451  12
  -1  -1  15 38.7217 8.33238   6
  -1   1  15 41.2539 8.79484   6
   1   1 -15 51.1846 12.5816   5
   1  -1 -15 39.6702 12.2049   5
   1  -1 -15 28.9263 10.4361   7
   1  -1 -15 44.2574 8.22873   2
   1  -1 -15 39.1534 4.82723   4
   1  -1 -14 517.099 45.0894   2
  -1   1  14 502.711 45.9549  12
  -1  -1  14 615.946 47.2844  12
   1   1 -14 503.347 42.5048  11
   1  -1 -14 502.381 41.2337  11
  -1   1  14 519.976 45.9779   6
   1  -1 -14 469.413 48.7469   5
  -1  -1  14 520.484 45.4044   6
   1  -1 -14 532.255 42.1416   4
   1   1 -14 523.185 49.1407   5
   1  -1 -14 485.310 43.2003   8
   1  -1 -14 542.956 48.6922   7
   1  -1 -13 113.620 13.4602   2
  -1  -1  13 120.400 14.9381  12
  -1   1  13 118.437 14.3898  12
   1  -1 -13 120.513 10.1752  11
   1  -1 -13 116.882 10.1238  11
   1   1 -13 124.778 11.4379  11
   1   1 -13 110.943 11.2497  11
   1  -1 -13 123.249 11.0413   4
   1  -1 -13 112.721 16.9138   5
  -1  -1  13 139.099 14.2213   6
  -1   1  13 99.9059 13.6423   6
   1   1 -13 108.309 16.6489   5
   1  -1 -13 124.407 10.9483  10
   1   1 -13 117.518 10.6152  10
   1  -1 -13 116.190 11.9170   8
   1  -1 -13 102.202 15.3749   7
   1  -1 -12 938.870 73.0462   2
  -1   1  12 879.456 73.7023  12
  -1  -1  12 859.006 73.8525  12
   1  -1 -12 867.221 69.7544  11
   1  -1 -12 876.462 69.8011  11
   1   1 -12 852.435 70.7944  11
   1   1 -12 885.413 70.9367  11
   1   1 -12 910.436 76.2477   5
   1  -1 -12 865.122 70.5636   4
   1  -1 -12 816.419 75.9444   5
  -1  -1  12 841.188 72.7958   6
  -1   1  12 892.816 73.5743   6
   1  -1 -12 872.634 70.3827  10
   1   1 -12 890.441 70.1328  10
   1  -1 -12 885.400 71.5174   8
  -1   1  12 804.112 71.0087   8
   1  -1 -12 903.809 75.6674   7
   1  -1 -11 31.9041 4.46614   4
   1   1 -11 27.2003 6.40311   2
  -1  -1  11 33.2462 3.95700   4
   1  -1 -11 35.6379 6.51537   2
  -1   1  11 37.1363 7.52276  12
  -1  -1  11 33.2520 7.50770  12
   1   1 -11 38.6709 4.89581  11
   1  -1 -11 34.1535 3.56197  11
   1  -1 -11 38.9248 3.77620  11
   1   1 -11 43.0525 10.1839   5
   1  -1 -11 30.1803 9.46507   5
  -1  -1  11 24.8244 6.14251   6
  -1   1  11 57.4339 8.28072   6
   1   1 -11 32.6414 4.81845  11
   1   1 -11 38.9706 4.04518  10
  -1  -1  11 35.9349 3.97673  10
   1  -1 -11 30.4652 4.10729  10
   1  -1 -11 32.8308 5.10049   8
   1  -1 -11 24.1503 7.77200   7
  -1   1  11 38.9500 5.02847   8
  -1  -1  11 35.2783 5.34396   8
   1  -1 -10 121.375 12.8620   2
  -1  -1  10 125.833 10.6652   4
   1   1 -10 129.123 13.3297   2
  -1   1  10 119.575 13.5046  12
  -1   1  10 112.870 14.3577  13
  -1  -1  10 120.760 13.7946  12
   1  -1 -10 127.876 10.4426  11
   1   1 -10 122.833 11.3525  11
   1  -1 -10 112.042 10.2370  11
   1   1 -10 117.143 11.2827  11
  -1  -1  10 103.272 12.5858   6
  -1   1  10 111.873 13.4289   6
   1  -1 -10 133.293 11.2697   4
   1   1 -10 123.385 15.6885   5
  -1  -1  10 123.150 10.5259  10
   1  -1 -10 123.780 10.8331  10
   1   1 -10 118.946 10.4707  10
  -1  -1  10 111.879 11.6709   8
   1  -1 -10 125.549 11.7858   8
  -1   1  10 127.963 11.5972   8
   1  -1 -10 114.347 14.6934   7
  -1  -1   9 478.830 39.6411   4
   1   1  -9 464.247 41.7430   2
   1  -1  -9 517.077 40.1412   4
   1  -1  -9 496.484 41.5114   2
  -1   1   9 458.122 42.5545  13
  -1   1   9 468.587 41.9095  12
  -1  -1   9 514.325 42.3303  12
   1  -1  -9 486.655 39.2848  11
   1  -1  -9 484.302 39.3610  11
   1   1  -9 490.239 40.2187  11
   1   1  -9 484.463 43.5745   5
  -1   1   9 468.225 41.8667   6
  -1  -1   9 543.708 41.6140   6
  -1  -1   9 511.535 39.4023  10
   1   1  -9 501.854 40.2970  11
   1   1  -9 490.483 39.3846  10
   1  -1  -9 464.911 39.6375  10
  -1  -1   9 474.897 40.6451   8
   1  -1  -9 484.533 40.6282   8
   1  -1  -9 532.352 43.3370   7
  -1   1   9 437.631 40.3066   8
   1  -1  -8 98.9141 10.4344   2
   1   1  -8 100.718 10.9794   2
   1  -1  -8 102.480 9.21404   4
  -1  -1   8 97.0504 8.75487   4
  -1   1   8 94.7197 9.97125   2
  -1   1   8 90.6054 11.4886  13
  -1   1   8 89.8692 10.7049  12
  -1  -1   8 108.729 11.4219  12
   1   1  -8 102.746 9.41167  11
   1  -1  -8 94.9494 8.30183  11
   1   1  -8 89.2566 12.3568   5
  -1  -1   8 118.776 10.6809   6
  -1   1   8 93.9322 10.8777   6
   1  -1  -8 97.4269 8.40034  11
   1   1  -8 94.6326 8.31340  10
   1   1  -8 97.7098 9.29645  11
  -1  -1   8 96.6957 8.32093  10
   1  -1  -8 95.4260 8.66543  10
   1  -1  -8 100.702 9.61244   8
  -1  -1   8 92.3837 9.61884   8
   1  -1  -8 93.6093 11.6020   7
  -1   1   8 87.5971 9.33092   8
  -1  -1   7 512.680 40.3227   4
   1   1  -7 509.751 42.0105   2
  -1   1   7 493.646 42.1785   3
  -1  -1   7 486.488 41.7130   2
   1  -1  -7 514.698 41.6988   2
   1  -1  -7 487.369 41.9307   3
  -1   1   7 500.968 41.3543   2
   1  -1  -7 497.778 40.6602   4
   1   1  -7 464.135 43.0104   1
  -1   1   7 490.224 41.9225  12
   1   1  -7 464.539 41.7632  12
   1  -1  -7 501.333 41.9655  12
  -1  -1   7 504.482 42.1731  12
  -1   1   7 484.831 42.5947  13
   1   1  -7 495.887 40.7756  11
   1  -1  -7 517.486 39.9509  11
  -1   1   7 468.222 41.8575   6
   1   1  -7 472.626 42.9312   5
   1  -1  -7 502.569 39.9757  11
   1  -1  -7 497.650 40.2130  10
   1   1  -7 474.219 40.6919  11
  -1  -1   7 484.461 41.0482   8
   1  -1  -7 483.898 40.9444   8
   1  -1  -7 524.744 42.7919   7
  -1   1   7 491.137 40.8363   8
  -1   1   6 603.342 51.9087   4
   1   1  -6 650.428 53.0916   2
   1  -1  -6 636.269 52.7885   2
   1  -1  -6 656.643 52.0869   4
  -1   1   6 652.478 53.2755   3
   1  -1  -6 617.091 52.9938   3
  -1  -1   6 607.013 52.8385   2
  -1   1   6 590.336 52.5009   2
   1   1  -6 583.420 53.8459   1
  -1   1   6 665.624 53.7767  13
   1   1  -6 635.759 53.0044  12
  -1   1   6 656.212 53.1357  12
   1  -1  -6 630.090 53.5212  13
  -1  -1   6 668.639 53.2895  12
   1  -1  -6 642.530 53.0055  12
   1   1  -6 630.303 52.0910  11
  -1   1   6 638.058 53.1125   6
   1   1  -6 671.588 54.1080   5
  -1  -1   6 640.015 51.7317   4
   1  -1  -6 743.840 53.3522   6
   1  -1  -6 660.954 51.6484  10
   1   1  -6 639.677 52.1259  11
   1  -1  -6 626.196 52.2777   8
   1  -1  -6 637.847 51.4438   9
  -1   1   6 659.978 51.4379   9
   1   1  -6 612.125 52.4612   8
  -1  -1   6 655.958 52.4688   8
   1  -1  -6 704.474 53.7380   7
  -1   1   6 637.619 52.2089   8
   1  -1  -5 42.1139 5.71991   3
  -1  -1   5 50.3992 6.12353   2
   1  -1  -5 38.1375 4.87470   4
  -1   1   5 54.6075 6.31495   3
  -1  -1   5 40.1924 4.51213   4
  -1   1   5 41.9356 4.82491   4
   1   1  -5 52.0052 6.07603   2
   1   1  -5 35.1794 6.58680   1
   1  -1  -5 43.2121 5.51239   2
  -1   1   5 41.6191 5.27728   2
   1  -1  -5 45.6650 6.47927  13
  -1   1   5 36.0791 5.54378  12
   1  -1  -5 42.6826 5.93725  12
  -1   1   5 51.5809 6.88486  13
   1   1  -5 45.9914 5.91675  12
  -1  -1   5 47.0683 6.18385  12
   1   1  -5 41.2860 4.86664  11
  -1   1   5 45.5893 6.01480   6
   1   1  -5 50.2941 7.06893   5
   1  -1  -5 48.3909 5.97025   6
   1   1  -5 44.4946 5.00157  11
  -1  -1   5 46.6652 5.31320   8
  -1   1   5 44.1580 4.21250   9
   1  -1  -5 45.4463 4.23626   9
   1   1  -5 36.2040 5.24472   8
   1  -1  -5 44.9994 6.53195   7
   1  -1  -5 41.6467 4.92639   8
  -1   1   5 37.5892 4.93871   8
   1  -1  -4 2459.27 194.423   4
  -1   1   4 2376.76 194.329   4
  -1  -1   4 2454.39 194.873   2
   1  -1  -4 2396.48 194.668   2
  -1   1   4 2490.44 194.989   3
   1  -1  -4 2413.83 194.877   3
  -1   1   4 2357.34 194.545   2
   1   1  -4 2259.82 195.404   1
  -1  -1   4 2453.54 195.657   1
  -1   1   4 2371.21 195.168  13
  -1  -1   4 2444.29 194.971  12
   1  -1  -4 2499.51 194.799  12
   1  -1  -4 2442.77 195.171  13
  -1   1   4 2477.50 194.763  12
  -1  -1   4 2266.44 195.179  13
   1   1  -4 2480.25 194.456  11
   1   1  -4 2452.73 194.881  12
  -1   1   4 2638.87 195.432   5
  -1  -1   4 2519.21 194.192   4
   1  -1  -4 2509.06 194.948   6
  -1   1   4 2431.57 194.876   6
   1   1  -4 2517.52 194.451  11
   1  -1  -4 2400.14 194.005  10
  -1  -1   4 2500.06 194.638   8
  -1   1   4 2456.66 194.002   9
   1  -1  -4 2429.24 194.502   8
   1  -1  -4 2390.49 193.992   9
   1   1  -4 2366.34 194.633   8
  -1   1   4 2447.75 194.438   8
   1  -1  -4 2535.10 195.093   7
  -1   1   3 1814.62 145.356   3
   1   1  -3 1749.29 145.400   3
   1  -1  -3 1855.79 145.306   3
  -1   1   3 1789.82 145.029   4
   1  -1  -3 1850.14 145.096   4
  -1  -1   3 1728.65 145.841   1
   1  -1  -3 1753.79 145.181   2
   1   1  -3 1737.75 145.724   1
  -1   1   3 1719.79 145.075   2
  -1   1   3 1832.56 145.126  12
   1  -1  -3 1921.50 145.576  13
   1  -1  -3 1804.06 145.133  12
  -1   1   3 1830.47 145.539  13
  -1  -1   3 1864.75 145.393  12
   1   1  -3 1847.54 145.383  12
  -1  -1   3 1847.43 145.171  11
   1   1  -3 1873.21 145.121  11
   1  -1  -3 1876.05 145.357   6
  -1   1   3 1850.29 145.361   6
  -1  -1   3 1840.97 144.914   4
   1  -1  -3 1748.67 144.720  10
  -1   1   3 1878.15 144.808   9
  -1  -1   3 1838.75 145.223   8
   1  -1  -3 1795.84 144.780   9
   1   1  -3 1755.20 145.216   8
  -1   1   3 1846.19 145.092   8
   1  -1  -3 1941.23 145.417   7
   1  -1  -3 1786.26 145.112   8
  -1   1   2 7547.31 607.405   3
   1  -1  -2 7540.98 607.330   4
  -1   1   2 7642.42 607.312   4
   1   1  -2 7586.55 607.424   3
   1   1  -2 7696.30 607.594   1
  -1  -1   2 7657.41 607.648   1
  -1   1   2 7703.13 607.334   2
   1  -1  -2 7859.24 607.421  13
  -1   1   2 7675.62 607.413  13
  -1  -1   2 8038.24 607.434  12
   1   1  -2 7687.57 607.401  12
   1  -1  -2 7538.53 607.036  11
  -1  -1   2 7913.16 607.408  11
  -1   1   2 7602.41 607.043  11
   1   1  -2 7847.65 607.378  11
  -1   1   2 7793.52 607.439   6
   1  -1  -2 7417.61 607.383   6
  -1   1   2 7659.10 607.108  10
   1  -1  -2 7578.78 607.093  10
  -1  -1   2 7087.88 607.313   8
  -1   1   2 7805.43 607.178   9
  -1  -1   2 7657.52 607.045   9
   1   1  -2 7628.44 607.067   9
   1  -1  -2 7617.67 607.152   9
  -1   1   2 7713.90 607.308   8
   1   1  -1 1246.78 11.5461   2
   1   1  -1 1296.17 10.6894   3
  -1  -1   1 1172.36 11.0193   2
   1  -1  -1 1214.49 10.6257  11
  -1   1   1 1277.30 10.9429  11
  -1   1   1 1147.42 11.6953   6
  -1   1   1 1310.26 11.6447  10
  -1  -1   1 1276.00 10.2454  10
  -1  -1   1 1258.33 10.9152   9
  -1   1   1 1276.54 11.6587   9
   1   1  -1 1271.98 11.9204   1
  -1  -1   1 1329.58 12.7435   1
  -1  -1   0 1263.47 99.2787  12
   1   1   0 1227.04 99.2833  11
   1   1   0 1236.64 99.2164   1
  -1  -1   0 1236.20 99.2354   1
  -1  -1   0 1237.48 99.1649   8
   1  -1   0 1267.71 99.2834   4
  -1   1  -1 810.986 60.1383   4
   1  -1   1 807.750 60.1280   4
  -1   1  -1 774.480 60.6139   1
  -1  -1  -1 794.482 60.4670   1
   1  -1   1 726.892 60.1629  12
  -1  -1  -1 811.881 60.4566  12
  -1  -1  -1 857.405 60.6555  13
   1   1   1 856.940 60.7517  13
  -1   1  -1 805.140 60.2219  12
   1   1   1 805.084 60.1848  11
   1  -1   1 805.594 60.3437  11
   1  -1   1 765.785 60.3773  10
   1   1   1 795.227 60.3254   9
   1  -1   1 816.387 60.3300   9
  -1   1  -1 671.710 60.1862   9
   1  -1   1 816.495 60.5439   7
  -1   1  -1 829.434 60.6913   7
  -1  -1  -2 4329.70 387.592   1
   1  -1   2 5059.86 387.551  13
  -1   1  -2 5024.31 387.518  13
  -1   1  -2 4903.22 387.584  12
  -1  -1  -2 4796.79 387.663  12
  -1  -1  -2 4988.57 387.826  13
   1  -1   2 4862.85 387.596  12
   1   1   2 5070.08 387.896  13
   1   1   2 4840.74 387.145  11
  -1  -1  -2 5058.19 387.199  11
   1  -1   2 4885.46 387.410  11
  -1   1  -2 4876.29 387.422  11
   1  -1   2 4886.72 388.089   5
  -1   1  -2 4856.68 388.148   5
   1  -1   2 4717.54 387.477  10
  -1  -1  -2 4916.70 387.519  10
  -1   1  -2 4872.32 387.484  10
   1   1   2 4907.80 387.566  10
   1   1   2 4901.46 387.380   9
   1  -1   2 4898.65 387.347   9
  -1   1  -2 4860.14 387.331   9
  -1   1  -2 4744.60 387.941   7
   1  -1   2 4807.89 387.801   7
  -1   1  -3 2362.77 184.665  13
  -1   1  -3 2362.11 184.681  12
   1   1   3 2344.65 184.952  13
   1  -1   3 2295.83 184.691  12
  -1  -1  -3 2312.43 184.906  13
   1  -1   3 2374.49 184.718  13
  -1  -1  -3 2101.69 184.606  12
   1   1   3 2306.85 183.862  11
   1  -1   3 2249.29 184.248  11
  -1  -1  -3 2364.57 183.898  11
  -1   1  -3 2254.45 184.226  11
   1  -1   3 2369.76 185.396   5
  -1   1  -3 2356.75 185.432   5
  -1  -1  -3 2370.25 184.410  10
   1   1   3 2242.07 184.438  10
   1  -1   3 2279.20 184.328  10
  -1   1  -3 2310.69 184.328  10
   1  -1   3 2367.98 184.115   9
   1   1   3 2328.79 184.166   9
  -1   1  -3 2273.58 185.109   7
   1  -1   3 2331.30 184.946   7
   1   1   4 11808.1 945.905   2
  -1   1  -4 12102.3 946.923  13
   1  -1   4 11909.3 947.001  13
   1   1   4 12206.4 947.204  13
  -1   1  -4 11867.6 946.854  12
   1  -1   4 11573.3 946.905  12
  -1  -1  -4 11778.9 947.119  13
  -1   1  -4 11707.8 946.187  11
   1   1   4 12270.0 945.767  11
  -1  -1  -4 12210.9 945.774  11
   1  -1   4 11865.5 946.202  11
  -1   1  -4 11543.1 947.707   5
   1  -1   4 11845.3 947.589   5
   1  -1   4 11902.0 946.309  10
  -1  -1  -4 11949.4 946.369  10
   1   1   4 11904.9 946.435  10
  -1   1  -4 11732.2 946.283  10
   1   1   4 11812.0 946.071   9
   1  -1   4 11982.8 945.996   9
  -1   1  -4 11671.7 947.398   7
   1  -1   4 11880.3 947.085   7
   1   1   5 1419.75 115.943   2
   1  -1   5 1307.49 116.923  12
   1  -1   5 1490.52 117.284  13
   1   1   5 1425.83 117.391  13
  -1   1  -5 1444.69 117.031  12
  -1  -1  -5 1396.50 117.257  13
  -1   1  -5 1458.98 117.157  13
  -1   1  -5 1434.47 116.110  11
  -1  -1  -5 1482.28 115.599  11
   1  -1   5 1471.11 116.158  11
   1   1   5 1439.44 115.589  11
   1  -1   5 1441.47 117.915   5
  -1   1  -5 1414.08 118.138   5
  -1  -1  -5 1443.81 116.302  10
   1   1   5 1435.21 116.380  10
  -1   1  -5 1493.71 116.282  10
   1  -1   5 1450.08 116.259  10
   1  -1   5 1490.24 115.848   9
   1   1   5 1454.07 115.943   9
   1  -1   5 1469.69 117.307   7
  -1   1  -5 1488.71 117.961   7
   1   1   6 2679.66 208.045   2
   1  -1   6 2625.09 209.456  13
   1   1   6 2614.96 209.636  13
  -1   1  -6 2520.33 209.221  13
  -1  -1  -6 2535.48 209.461  13
  -1   1  -6 2585.80 209.170  12
   1   1   6 2613.38 207.452  11
   1  -1   6 2689.54 208.108  11
  -1  -1  -6 2655.61 207.437  11
  -1   1  -6 2598.44 207.997  11
   1  -1   6 2550.40 210.094   5
  -1  -1  -6 2186.43 210.221   5
  -1   1  -6 2466.96 210.374   5
   1  -1   6 2620.53 208.201  10
  -1  -1  -6 2576.14 208.201  10
   1   1   6 2671.35 208.371  10
  -1   1  -6 2559.47 208.129  10
   1   1   6 2613.27 207.795   9
   1  -1   6 2700.51 207.688   9
  -1   1  -6 2613.62 210.150   7
   1  -1   6 2504.39 209.279   7
   1   1   7 51.5533 5.51559   2
   1  -1   7 42.0549 6.23286   2
   1   1   7 60.6510 8.02284  13
   1  -1   7 37.3721 6.95791  13
  -1  -1  -7 42.8537 4.38240  11
  -1   1  -7 44.1081 5.06878  11
  -1  -1  -7 40.6849 9.49416   5
  -1   1  -7 43.7466 8.91416   5
   1   1   7 32.1750 5.35242  10
  -1   1  -7 35.0094 5.22648  10
   1  -1   7 36.1895 5.26603  11
   1   1   7 41.8265 4.48784  11
   1  -1   7 43.3346 5.32990  10
  -1  -1  -7 45.1771 5.44494  10
   1  -1   7 42.4776 4.64924   8
   1   1   7 46.3485 5.03434   9
   1  -1   7 45.1092 4.71169   9
  -1   1  -7 56.0065 9.08410   7
   1   1   7 39.5513 4.05821   8
   1   1   8 1372.63 112.997   2
   1  -1   8 1469.66 113.729   2
   1   1   8 1377.45 114.910  13
   1  -1   8 1366.35 114.740  13
  -1  -1  -8 1384.08 111.944  11
   1   1   8 1466.25 112.080  11
   1  -1   8 1417.90 112.772  11
  -1   1  -8 1380.06 112.612  11
  -1   1  -8 1491.69 116.509   5
  -1  -1  -8 1409.94 116.473   5
  -1   1  -8 1436.91 112.874  10
   1  -1   8 1405.49 112.921  10
   1   1   8 1339.17 113.058  10
  -1  -1  -8 1329.15 112.819  10
   1  -1   8 1419.40 112.154   9
   1   1   8 1471.81 112.408   9
   1  -1   8 1328.55 112.209   8
  -1   1  -8 1474.81 115.931   7
   1   1   8 1385.36 111.766   8
   1   1   9 24.2641 4.55639   2
   1  -1   9 18.4509 6.47954  13
   1   1   9 21.8680 6.51436  13
  -1  -1  -9 26.2395 3.45925  11
  -1   1  -9 29.9491 4.37292  11
  -1  -1  -9 22.3343 9.17104   5
  -1   1  -9 35.4369 8.58940   5
   1   1   9 27.9641 4.84926  10
   1  -1   9 28.7085 4.43267  11
  -1   1  -9 30.9589 4.58808  10
  -1  -1  -9 21.4150 4.24762  10
   1  -1   9 36.7496 5.15680  10
   1   1   9 25.5856 3.66466  11
   1  -1   9 29.9018 3.70383   9
   1  -1   9 32.6993 3.93163   8
   1   1   9 28.2895 3.95658   9
   1   1   9 28.7005 3.32708   8
  -1   1  -9 29.7683 7.96769   7
   1   1  10 366.351 33.0622   2
  -1  -1 -10 383.912 31.5223   4
   1  -1  10 395.287 35.5875  13
   1   1  10 404.158 35.6629  13
  -1   1 -10 376.280 32.4053  11
  -1  -1 -10 390.579 31.6693  11
  -1  -1 -10 373.517 37.5088   5
  -1   1 -10 331.469 36.5616   5
  -1  -1 -10 382.900 32.7654  10
   1  -1  10 368.261 32.4483  11
  -1   1 -10 362.483 32.6050  10
   1  -1  10 396.210 32.8982  10
   1   1  10 400.587 31.8271  11
   1   1  10 408.181 33.1659  10
   1  -1  10 409.614 32.1587   8
   1  -1  10 390.154 31.8100   9
   1   1  10 413.647 32.2193   9
   1   1  10 380.444 31.6047   8
  -1   1 -10 345.072 36.2290   7
  -1  -1 -11 43.5714 4.00051   4
   1   1  11 32.8318 7.99144  13
   1   1  11 15.9343 6.63550  12
   1  -1  11 38.5222 8.50997  13
  -1  -1 -11 33.3486 4.06224  11
  -1   1 -11 44.4871 5.22929  11
  -1   1 -11 40.6421 10.1005   5
  -1  -1 -11 35.7866 10.2683   5
   1  -1  11 34.3031 5.42128  10
   1   1  11 41.7504 5.95805  10
   1   1  11 39.6852 4.29424  11
  -1   1 -11 32.1607 5.23923  10
   1  -1  11 35.8940 5.12461  11
   1  -1  11 38.0588 4.28772   9
   1  -1  11 37.3012 4.27101   9
   1   1  11 36.5427 4.61560   9
   1   1  11 36.6124 4.18765   8
   1  -1  11 38.0124 4.71165   8
  -1   1 -11 28.5193 8.73184   7
  -1  -1 -12 58.7757 5.38001   4
   1  -1  12 59.2938 10.2016  13
   1   1  12 46.3721 8.83710  12
   1   1  12 66.4896 10.8893  13
  -1  -1 -12 55.9501 5.68809  11
  -1   1 -12 47.5380 6.46552  11
  -1   1 -12 62.4536 12.9293   5
  -1  -1 -12 54.1509 12.6560   5
   1   1  12 66.8839 7.83739  10
  -1   1 -12 51.6089 6.92432  10
   1  -1  12 66.9845 6.92018  11
   1  -1  12 66.7715 7.45967  10
   1   1  12 53.5444 5.87495  11
   1   1  12 60.7199 6.22632   9
   1  -1  12 61.0300 5.89899   9
   1  -1  12 53.9196 5.70194   9
   1  -1  12 60.6526 6.37054   8
   1   1  12 59.4278 5.82825   8
  -1   1 -12 34.6947 10.6553   7
   1   1  13 33.3861 8.25977  13
   1  -1  13 14.4075 7.67760  13
   1   1  13 8.80581 5.81997  12
  -1   1 -13 15.4374 3.56921  11
  -1  -1 -13 17.4768 2.84167  11
  -1   1 -13 23.4255 10.5556   5
  -1  -1 -13 14.2498 9.80399   5
   1   1  13 11.3854 7.84977   6
   1  -1  13 20.1907 4.48302  10
   1  -1  13 20.7004 3.95401  11
   1   1  13 19.0464 4.90740  10
   1   1  13 18.0283 3.22051   9
   1  -1  13 24.9946 3.15620   9
   1  -1  13 17.1070 3.38878   8
  -1   1 -13 34.8887 9.94203   7
  -1  -1 -14 50.0496 5.26203  11
  -1   1 -14 59.8179 6.50931  11
  -1  -1 -14 50.8014 13.8767   5
  -1   1 -14 21.1961 10.7618   5
   1   1  14 64.9553 11.4097   6
   1   1  14 57.3749 7.49508  10
   1  -1  14 51.1579 7.05148  10
   1   1  14 48.6769 11.1272  13
   1  -1  14 53.2694 10.3435  13
   1   1  14 43.5804 9.67739  12
  -1   1 -14 69.8970 13.4829   7
  -1   1 -15 7.71298 3.41152  11
   1  -1  15 5.36059 4.16017  10
   1  -1  15 10.1806 7.08023  13
   1   1  15 3.39606 7.60844  13
   1   1  15 8.79094 7.09336  12
  -1   1 -15 17.5778 11.7717   7
   1   1  15-3.35036 7.50651   6
  -1   1 -15 22.9694 11.5688   5
  -1  -1 -15-2.38004 10.4742   5
   1  -1  16-5.46345 8.79536  13
   1   1  16-3.14747 6.16187  12
   1   1  16 1.82316 6.82081  13
  -1   1 -16-4.81431 9.62668   7
  -1   1 -16 14.8295 11.5901   5
  -1  -1 -16-2.56303 10.6685   5
   1   1  16-1.80530 7.79854   6
   1  -1  17 250.597 29.5025  13
   1  -1  17 263.437 29.0810  12
   1   1  17 266.304 29.9346  13
   1   1  17 307.943 29.5499  12
  -1   1 -17 248.106 32.1659   7
  -1   1 -17 281.858 33.0348   5
   1  -1  17 311.149 30.3299   6
   1   1  17 265.072 30.0575   6
  -1  -1 -17 260.488 32.9486   5
   1  -1  18 55.3604 12.4864  12
   1   1  18 73.6607 12.3644  12
   1   1  18 41.8241 12.0979  13
   1  -1  18 48.2597 11.8902  13
  -1   1 -18 70.2497 16.0389   7
   1  -1  18 55.7546 13.2409   6
  -1  -1 -18 14.6736 13.8972   5
   1   1  18 41.2697 12.1893   6
  -1   1 -18 42.6225 15.3560   5
   1  -1  19 11.2160 10.6776  13
   1  -1  19 9.83728 8.34585  12
   1   1  19-2.23457 8.35964  13
   1   1  19 1.91198 8.25938  12
  -1   1 -19 5.98996 12.7037   7
   1  -1  19-10.2317 10.2976   6
   1   1  19-2.18782 10.2597   6
  -1  -1 -19 15.6209 13.0040   5
  -1   1 -19-3.03844 12.1510   5
   1   1  20 20.3166 9.13325  12
   1   1  20-4.75061 10.1198  13
   1  -1  20 23.8107 11.8608  13
   1  -1  20 16.7311 10.4278  12
  -1   1 -20 16.1672 14.9609   7
  -1  -1 -20-9.98086 16.3220   5
   1   1  20 25.3814 11.4962   6
  -1   1 -20 25.8518 16.0731   5
   1  -1  20 8.66860 10.3588   6
   1  -1  21 325.952 33.9863  12
   1  -1  21 319.250 34.8938  13
   1   1  21 308.413 34.4824  13
   1   1  21 288.524 32.7356  12
  -1   1 -21 320.369 39.1980   7
  -1   1 -21 237.270 36.5901   5
   1   1  21 285.185 33.9176   6
  -1  -1 -21 299.727 38.9856   5
   1  -1  22 28.1478 11.7249  12
   1   1  22 13.6828 10.4523  12
   1   1  22 18.7428 10.3403  13
   1  -1  22 5.37736 12.2942  13
  -1   1 -22 22.0655 16.7685   7
  -1  -1 -22 7.45914 14.0164   5
  -1   1 -22 29.1270 16.6023   5
   1  -1  23-4.94343 10.0941  12
   1   1  23 12.0447 9.83811  12
   1  -1  23 8.54115 12.9441  13
   1   1  23 11.3554 12.4839  13
  -1   1 -23-3.93804 16.3946   7
  -1  -1 -23 3.94600 14.7647   5
  -1   1 -23 3.84914 13.6999   5
  -1  -1 -24 15.6512 12.3147   1
   1   1  24 7.62062 11.6326  12
   1   1  24 33.0708 13.5170  13
   1  -1  24 36.1024 13.0729  13
   1  -1  24 15.6153 10.9259  12
  -1   1 -24 12.6099 16.5164   7
  -1  -1 -24-4.33878 18.4580   7
  -1  -1 -24 20.7957 16.6931   5
  -1   1 -24 24.4110 18.8405   5
  -1  -1 -25 24.8026 13.3846   1
   1  -1  25 24.6163 12.5124  12
   1   1  25 6.33290 11.6468  13
   1  -1  25 6.32801 11.9211  13
   1   1  25 18.7231 12.0433  12
  -1  -1 -25 31.8059 19.6774   7
  -1   1 -25 8.94762 17.9471   7
  -1  -1 -25 39.4681 20.9213   5
  -1   1 -25 29.9893 20.7380   5
  -1   1 -26 13.5033 20.1523   5
   1  -2 -27 388.507 43.0888   1
   1  -2 -26 267.355 31.6782   1
  -1  -2  26 243.153 31.9692  12
  -1  -2  26 273.987 34.0254  13
  -1   2  26 237.910 33.2288  13
  -1   2  26 243.250 30.2817  12
   1  -2 -26 220.356 37.4034   7
   1   2 -26 203.037 36.5254   5
   1  -2 -26 254.442 37.7562   5
   1  -2 -25 66.2834 16.1203   1
  -1  -2  25 80.1099 16.5379  12
  -1   2  25 60.2854 14.6656  12
  -1  -2  25 50.9280 17.0797  13
   1  -2 -25 41.4671 19.7058   7
   1   2 -25 69.8960 22.4949   5
   1  -2 -25 38.2060 17.6030   5
   1  -2 -24 12.0305 11.1126   1
   1   2 -24-11.6728 17.3974   5
   1  -2 -24-12.1215 16.8188   5
   1  -2 -24-11.6687 15.5556   7
  -1  -2  24-5.08840 12.8040  12
  -1   2  24-4.76504 10.4755  12
  -1  -2  24 6.05104 11.5859  13
   1  -2 -23 7.66739 14.6842   5
   1   2 -23 3.68187 16.1903   5
   1  -2 -23-3.69611 16.2529   7
  -1   2  23 11.2776 10.7441  12
  -1  -2  23 7.25327 9.67797  12
  -1  -2  23 2.86974 11.2424  13
   1   2 -22 163.230 26.5365   5
   1  -2 -22 94.2979 23.2465   5
   1  -2 -22 144.748 25.2878   7
  -1  -2  22 112.359 18.8724  12
  -1   2  22 108.674 17.8974  12
  -1  -2  22 139.198 21.4642  13
   1   2 -21-9.79918 13.6011   5
   1  -2 -21 3.42235 12.1834   5
   1  -2 -21-3.20595 13.0907   7
  -1  -2  21 2.57845 10.1017  13
  -1   2  21 24.1093 10.1173  12
  -1  -2  21 8.67855 9.70842  12
   1  -2 -20 3.21097 14.3595   5
  -1   2  20-12.9375 8.93108   6
   1   2 -20-3.06272 12.7516   5
   1  -2 -20 5.94230 11.8856   7
  -1  -2  20-2.42967 9.51688  13
  -1  -2  20-2.04892 8.85573  12
  -1   2  20-1.89010 8.31465  12
  -1   2  19 49.0617 11.3245   6
   1  -2 -19 39.1499 14.9379   5
   1   2 -19 40.0643 14.4250   5
   1  -2 -19 72.5538 17.2339   7
  -1   2  19 31.9557 9.77965  12
  -1  -2  19 38.6165 11.3309  12
  -1  -2  19 50.2580 12.6950  13
   1  -2 -18 509.615 54.3929   5
   1   2 -18 540.887 54.3868   5
  -1  -2  18 564.791 49.6286   6
  -1   2  18 590.632 50.9385   6
   1  -2 -18 490.588 53.7126   7
  -1  -2  18 569.922 52.5784  13
  -1  -2  18 573.528 51.3596  12
  -1   2  18 498.596 50.0018  12
  -1   2  17 77.4851 13.0372   6
   1   2 -17 106.270 17.4188   5
  -1  -2  17 57.9977 10.9496   6
   1  -2 -17 78.7182 16.9603   5
  -1   2  17 79.2283 12.3678  12
  -1  -2  17 60.1284 13.3404  13
  -1  -2  17 79.9347 13.2401  12
   1  -2 -17 42.4213 14.0459   7
   1  -2 -16 86.6410 11.1772   2
   1   2 -16 68.1093 8.14014  11
  -1  -2  16 69.8983 12.2778  12
  -1  -2  16 78.5071 13.7952  13
  -1   2  16 72.2331 11.6345  12
   1   2 -16 79.8496 15.3064   5
   1  -2 -16 38.9645 14.1277   5
  -1   2  16 52.3694 11.2679   6
  -1  -2  16 71.9082 11.2548   6
   1  -2 -16 63.4916 8.26838   8
   1  -2 -16 94.7972 15.9828   7
   1  -2 -15 136.748 15.9783   2
  -1   2  15 163.686 17.6376  12
  -1  -2  15 152.282 17.9911  12
  -1  -2  15 126.222 18.0882  13
   1   2 -15 142.641 13.9265  11
   1  -2 -15 153.415 13.5020   4
  -1   2  15 125.980 16.8531   6
   1   2 -15 174.000 21.6714   5
  -1  -2  15 118.496 15.7811   6
   1  -2 -15 147.702 14.3007   8
   1  -2 -15 147.480 19.9316   7
   1  -2 -14 123.144 14.2728   2
  -1   2  14 158.813 16.3896  12
  -1  -2  14 108.231 15.3230  12
   1   2 -14 128.317 12.8284  11
   1   2 -14 126.180 12.8009  11
  -1   2  14 123.201 15.5040   6
  -1  -2  14 98.5851 14.0141   6
   1   2 -14 139.881 18.7236   5
   1  -2 -14 135.091 12.2995   4
  -1  -2  14 138.993 11.6416  10
   1  -2 -14 122.804 12.7949   8
   1  -2 -14 124.545 17.7826   7
   1  -2 -13 3.84896 2.92950   4
   1  -2 -13 6.24458 4.37498   2
  -1   2  13-1.13918 5.01271  12
  -1   2  13-1.41965 6.55920  13
  -1  -2  13-1.26366 6.19307  12
   1   2 -13 2.71251 3.10812  11
  -1   2  13 1.16845 4.86859   6
  -1  -2  13 1.82931 4.78599   6
   1   2 -13 3.47980 7.10475   5
   1   2 -13 3.58025 2.06844  10
  -1  -2  13 3.93612 2.06703  10
   1  -2 -13 1.54028 2.44531  10
   1   2 -13 5.30137 3.24625  11
   1  -2 -13 3.43419 3.31144   8
   1  -2 -13-4.87807 8.60469   7
   1  -2 -12 326.417 27.9318   2
   1  -2 -12 327.048 26.0985   4
  -1  -2  12 289.434 24.9547   4
  -1   2  12 328.230 28.8790  12
  -1   2  12 272.437 29.2188  13
  -1  -2  12 279.326 28.8897  12
   1   2 -12 327.624 26.5701  11
   1   2 -12 302.955 26.4190  11
   1   2 -12 332.964 31.4043   5
  -1   2  12 303.593 28.8698   6
  -1  -2  12 305.353 25.1526  10
   1  -2 -12 295.959 25.6437  10
   1   2 -12 300.414 25.1273  10
   1  -2 -12 291.070 26.3668   8
  -1   2  12 310.640 24.7866   9
  -1   2  12 282.833 26.0935   8
   1  -2 -12 320.853 30.9647   7
   1  -2 -11 22.4213 5.44398   2
   1  -2 -11 32.8647 4.45758   4
  -1  -2  11 27.4536 3.32565   4
  -1   2  11 24.6039 6.20993  12
  -1   2  11 26.0442 7.05067  13
  -1  -2  11 14.7233 5.97031  12
   1   2 -11 25.5134 4.75740  11
  -1   2  11 22.7211 6.70235   6
   1   2 -11 25.2478 8.41501   5
  -1  -2  11 22.2969 3.21817  10
   1  -2 -11 30.9737 3.91420  10
   1   2 -11 24.7259 4.51819  11
   1   2 -11 23.6298 3.21501  10
  -1   2  11 26.4849 3.09343   9
   1  -2 -11 27.8514 2.96346   9
   1  -2 -11 26.2576 7.83454   7
  -1   2  11 16.9753 3.95700   8
   1  -2 -11 20.2270 4.27419   8
   1  -2 -10 63.4261 6.91978   4
   1  -2 -10 59.7173 7.71652   2
  -1  -2  10 61.9087 5.88065   4
  -1   2  10 63.0235 8.73153  12
  -1   2  10 62.1674 10.3109  13
  -1  -2  10 70.0764 9.37215  12
   1   2 -10 58.1198 7.00196  11
   1   2 -10 64.4783 10.9753   5
  -1   2  10 59.2734 9.21884   6
   1   2 -10 59.7680 7.22602  11
  -1  -2  10 60.7293 5.76002  10
   1   2 -10 59.2842 5.72013  10
   1  -2 -10 52.1980 6.12529  10
  -1   2  10 60.1971 5.74614   9
  -1  -2  10 61.0133 7.54954   8
   1  -2 -10 59.6379 5.64781   9
   1  -2 -10 63.5448 10.1073   7
   1  -2 -10 64.0323 7.17662   8
  -1   2  10 45.3509 6.47816   8
   1  -2  -9 186.897 17.9706   2
   1  -2  -9 201.175 17.2409   4
  -1  -2   9 231.129 19.7270  12
  -1   2   9 202.439 18.9149  12
  -1   2   9 169.183 19.4116  13
   1   2  -9 217.227 17.6348  11
   1   2  -9 207.768 20.5157   5
  -1  -2   9 193.301 16.3679   4
  -1   2   9 198.940 19.3120   6
   1   2  -9 186.948 17.3591  11
   1  -2  -9 190.000 16.7085  10
   1   2  -9 190.117 16.1509  10
  -1  -2   9 201.814 16.1817  10
   1  -2  -9 183.211 17.2675   8
   1  -2  -9 193.661 16.2934   9
  -1  -2   9 171.514 17.4649   8
  -1   2   9 195.349 16.3233   9
   1  -2  -9 220.838 20.5900   7
  -1   2   9 173.584 17.0257   8
   1  -2  -8 23.8833 4.91481   2
  -1  -2   8 26.5216 3.53659   4
  -1   2   8 37.6888 6.28719   3
   1  -2  -8 25.2638 4.31653   4
  -1   2   8 30.8695 4.64654   2
  -1   2   8 21.2992 6.31936  13
  -1   2   8 27.9509 5.93400  12
  -1  -2   8 26.3381 6.03570  12
   1   2  -8 42.7723 8.02795   5
   1   2  -8 23.2593 6.03336   7
  -1   2   8 19.7557 5.80087   6
   1   2  -8 24.2149 4.53424  11
   1  -2  -8 26.6732 3.68375  10
   1   2  -8 28.3548 3.20090  10
  -1  -2   8 29.5870 3.23933  10
   1  -2  -8 28.4524 3.55710   9
  -1   2   8 30.2937 3.55862   9
  -1  -2   8 30.9738 4.75688   8
   1  -2  -8 33.9941 4.65095   8
  -1   2   8 34.3491 4.55759   8
   1  -2  -8 35.1312 7.20302   7
  -1   2   7 70.4537 8.04609   3
   1  -2  -7 63.4028 6.64459   4
   1  -2  -7 53.5528 7.23797   3
   1   2  -7 66.9029 8.23232   2
   1  -2  -7 55.6151 6.98902   2
  -1   2   7 56.2311 6.64929   2
  -1   2   7 49.9027 7.49430  12
  -1   2   7 64.9934 8.71993  13
   1  -2  -7 71.1385 7.99077  12
  -1  -2   7 47.9139 7.75957  12
   1  -2  -7 58.4210 8.03661   6
  -1   2   7 57.9013 7.78991   7
  -1   2   7 48.2271 7.99464   6
  -1  -2   7 62.3288 5.88589   4
   1   2  -7 59.6747 9.13049   5
   1  -2  -7 61.8821 9.54415   5
  -1  -2   7 68.6842 5.51625  10
   1   2  -7 56.9337 5.41897  10
   1   2  -7 62.2196 6.76969  11
  -1  -2   7 53.8830 6.80892   8
   1  -2  -7 53.6439 5.77696   9
  -1   2   7 54.7304 5.77480   9
  -1   2   7 52.4807 6.31877   8
   1  -2  -7 59.6273 6.57538   8
   1  -2  -7 66.8244 9.09524   7
  -1   2   6 90.1305 10.1725   3
   1   2  -6 85.9761 10.1340   3
   1   2  -6 95.6322 10.2995   2
  -1  -2   6 88.2218 9.84515   2
   1  -2  -6 90.3713 9.37610   2
   1  -2  -6 93.9411 9.12535   4
   1  -2  -6 103.010 9.90813   3
  -1  -2   6 96.2624 12.1309   1
  -1   2   6 85.3357 9.14565   2
   1   2  -6 88.2642 11.1841   1
   1  -2  -6 100.073 9.93996  12
  -1   2   6 82.4972 10.3431  13
  -1   2   6 95.8027 9.81963  12
   1  -2  -6 88.4694 10.5505  13
  -1  -2   6 96.8229 10.3879  12
   1   2  -6 79.1232 9.65629  12
   1  -2  -6 76.9425 11.2683   5
  -1  -2   6 93.3520 8.49819   4
   1  -2  -6 92.3769 10.2532   6
  -1   2   6 90.8413 10.1649   7
  -1   2   6 95.2113 10.9217   5
  -1   2   6 105.219 10.6658   6
   1   2  -6 87.8986 10.8166   5
  -1  -2   6 92.8402 8.09405  10
   1   2  -6 87.4992 8.04364  10
   1   2  -6 101.624 9.44447  11
  -1  -2   6 98.5197 8.08748   9
   1  -2  -6 100.432 8.60634   9
  -1   2   6 94.5587 8.52617   9
   1   2  -6 100.023 8.16010   9
  -1  -2   6 92.3316 9.46546   8
   1  -2  -6 94.6685 9.11405   8
   1  -2  -6 100.172 10.8210   7
  -1   2   6 91.8852 9.09877   8
   1  -2  -5 220.512 18.6578   4
   1   2  -5 209.674 19.3114   3
   1  -2  -5 208.847 18.9190   3
  -1  -2   5 226.580 19.3448   2
   1  -2  -5 215.370 18.7569   2
   1   2  -5 193.675 19.2462   2
  -1   2   5 227.506 19.2101   3
   1   2  -5 215.670 20.4285   1
  -1  -2   5 183.276 20.2810   1
  -1   2   5 194.571 18.4216   2
   1  -2  -5 222.219 19.6667  13
  -1   2   5 196.703 18.8820  12
   1  -2  -5 220.471 19.0303  12
  -1  -2   5 218.942 19.5447  12
  -1   2   5 197.702 19.5620  13
   1   2  -5 187.734 19.1613  12
   1   2  -5 231.951 19.8671   5
  -1   2   5 208.850 19.4756   6
  -1   2   5 219.386 19.8210   5
   1  -2  -5 185.227 19.1862   6
   1  -2  -5 188.767 19.9146   5
  -1  -2   5 239.094 17.8055  10
   1   2  -5 243.439 18.8621  11
  -1  -2   5 216.072 18.8490   8
   1   2  -5 233.113 17.9100   9
  -1  -2   5 226.242 17.8174   9
   1  -2  -5 218.373 18.1391   9
  -1   2   5 200.507 18.0927   9
  -1   2   5 212.131 18.4958   8
   1  -2  -5 219.281 18.5980   8
   1  -2  -5 228.306 19.6286   7
  -1   2   5 211.813 19.1129   7
   1  -2  -4 1359.91 109.170   4
   1  -2  -4 1377.21 109.276   3
   1   2  -4 1291.45 109.562   3
  -1   2   4 1387.88 109.418   3
  -1  -2   4 1367.30 110.566   1
  -1   2   4 1332.71 109.044   2
   1   2  -4 1365.08 110.278   1
   1  -2  -4 1312.80 109.197   1
   1  -2  -4 1377.64 109.232   2
  -1   2   4 1342.47 109.806  13
   1  -2  -4 1363.76 109.269  12
  -1   2   4 1296.90 109.213  12
   1  -2  -4 1321.12 109.741  13
  -1   2   4 1401.82 108.419  11
   1  -2  -4 1320.30 108.404  11
   1   2  -4 1377.66 109.309  11
  -1  -2   4 1420.61 109.775  12
   1   2  -4 1389.41 109.688  12
   1  -2  -4 1373.53 109.780   6
  -1   2   4 1399.06 109.840   6
   1  -2  -4 1315.37 110.061   5
  -1   2   4 1437.63 109.945   5
   1   2  -4 1378.61 109.252  11
  -1  -2   4 1383.43 108.524  10
   1  -2  -4 1310.26 108.858  10
   1   2  -4 1409.18 108.676   9
   1  -2  -4 1373.04 108.845   9
  -1   2   4 1313.40 108.841   9
  -1  -2   4 1332.98 108.589   9
   1  -2  -4 1373.51 109.141   8
  -1   2   4 1330.73 109.053   8
   1  -2  -4 1416.93 109.625   7
  -1   2   4 1427.26 109.441   7
   1  -2  -3 9734.04 755.498   3
  -1   2   3 9587.20 755.577   3
   1   2  -3 9602.04 755.755   3
   1  -2  -3 9403.42 755.570   4
   1   2  -3 9390.81 756.246   1
  -1   2   3 9321.77 755.413   1
   1  -2  -3 9193.75 755.398   1
  -1  -2   3 9121.27 756.268   1
   1  -2  -3 10056.8 755.598   2
  -1   2   3 9524.24 755.894  13
  -1   2   3 9380.20 755.424  12
   1  -2  -3 9521.30 755.418  12
   1  -2  -3 9247.75 755.836  13
  -1  -2   3 9398.23 755.812  12
  -1   2   3 9366.86 755.011  11
   1  -2  -3 9510.30 755.012  11
   1   2  -3 9224.19 755.775  12
   1   2  -3 9393.14 755.663  11
   1  -2  -3 9239.12 755.987   5
   1  -2  -3 9439.50 755.931   6
  -1   2   3 11203.5 756.185   5
  -1   2   3 9666.28 756.031   6
   1   2  -3 9496.40 755.628  11
   1  -2  -3 9378.42 755.339  10
   1  -2  -3 9552.01 755.345   9
  -1   2   3 9262.41 755.343   9
   1   2  -3 9595.65 755.231   9
  -1  -2   3 9461.94 755.162   9
   1  -2  -3 9518.48 755.537   8
  -1   2   3 9926.78 755.487   7
   1  -2  -3 9837.27 755.625   7
   1   2  -2 1520.70 120.165   3
   1   2  -2 1476.74 120.342   2
  -1  -2   2 1507.64 120.195   3
   1  -2  -2 1503.75 120.049   3
  -1   2   2 1492.61 120.060   3
  -1   2   2 1516.53 119.954   1
   1   2  -2 1412.98 120.453   1
  -1  -2   2 1430.68 120.559   1
   1  -2  -2 1549.21 119.946   1
  -1   2   2 1488.39 119.925  12
  -1   2   2 1571.99 120.392  13
   1  -2  -2 1485.22 119.887  12
   1  -2  -2 1519.57 120.278  13
   1  -2  -2 1480.99 119.874  11
  -1   2   2 1496.74 119.880  11
  -1  -2   2 1439.21 120.347  12
   1  -2  -2 1629.34 120.412   5
   1  -2  -2 1410.74 120.406   6
  -1   2   2 1494.90 120.536   6
  -1   2   2 1514.15 120.123  10
   1  -2  -2 1416.09 120.068  10
  -1  -2   2 1492.88 119.992   9
   1  -2  -2 1524.44 120.136   9
  -1   2   2 1470.01 120.127   9
   1   2  -2 1497.62 120.051   9
  -1   2   2 1647.65 119.880   7
   1   2  -2 1330.44 121.998   7
   1  -2  -2 1566.83 119.926   7
  -1   2   1 3369.15 273.944   3
   1   2  -1 3516.11 273.799   3
  -1  -2   1 3554.59 273.841   3
   1  -2  -1 3448.84 273.955   3
  -1  -2   1 3452.19 274.022   2
  -1  -2   1 3724.64 274.518   1
  -1   2   1 3504.65 273.783   1
   1  -2  -1 3666.10 273.847   1
  -1   2   1 2773.57 274.031  13
   1  -2  -1 3792.06 274.145  13
  -1   2   1 3374.74 273.977  11
   1  -2  -1 3431.45 273.973  11
   1   2  -1 3545.04 273.942   6
  -1  -2   1 3347.26 273.901   6
  -1   2   1 3557.67 274.154  10
  -1   2   1 3507.36 274.163   9
   1   2  -1 3209.24 274.038   9
  -1  -2   1 3442.28 274.061   9
   1   2  -1 2908.21 276.239   7
   1   2   0 4320.36 330.800  11
  -1  -2   0 4821.88 331.023   6
   1   2   0 4077.88 330.893   6
   1  -2   0 4196.68 330.659   1
  -1  -2   0 4202.64 330.797   1
  -1   2   0 4179.12 330.624   1
   1  -2   0 4112.06 330.704   4
   1  -2   1 117.854 10.7318   4
   1  -2   1 124.725 11.5149   1
  -1   2  -1 104.511 11.2896   1
  -1  -2  -1 116.502 11.9210  13
   1  -2   1 131.096 10.8715  12
  -1   2  -1 136.079 10.9340  12
  -1  -2  -1 136.246 10.9269  11
   1   2   1 130.060 10.8873  11
   1  -2   1 130.161 11.1499  10
  -1   2  -1 112.919 10.9315   9
   1  -2   1 123.287 11.0157   9
   1   2   1 115.292 10.9826   9
   1  -2   1 124.221 10.5835   7
  -1   2  -1 126.286 10.7132   7
   1   2   1 146.264 13.1970   7
   1  -2   2 1428.73 119.086   4
  -1   2  -2 1449.95 120.195   1
   1  -2   2 1435.90 120.260   1
  -1  -2  -2 1558.19 120.117  13
   1  -2   2 1491.73 119.597  12
   1  -2   2 1488.18 119.562  11
   1   2   2 1541.43 119.176  11
  -1   2  -2 1518.71 119.601  12
  -1  -2  -2 1517.84 119.224  11
  -1   2  -2 1444.93 119.546  11
  -1   2  -2 1495.26 119.779   5
   1   2   2 1412.06 120.385   5
  -1  -2  -2 1474.56 120.752   5
   1  -2   2 1511.95 119.748   5
  -1   2  -2 1470.29 119.533  10
   1   2   2 1478.17 119.669  10
   1  -2   2 1498.20 119.592  10
  -1  -2  -2 1539.74 119.650  10
   1   2   2 1529.84 119.527   9
  -1  -2  -2 1499.17 119.457   9
   1  -2   2 1559.72 119.460   9
  -1   2  -2 1455.37 119.426   9
   1   2   2 1370.94 120.753   7
  -1   2  -2 1507.25 119.603   7
   1  -2   2 1550.82 119.484   7
   1  -2   3 21.8456 2.80648   4
   1  -2   3 21.3267 5.75712   1
  -1   2  -3 17.2374 5.34113   1
   1  -2   3 24.9245 4.33325  13
   1   2   3 24.6119 4.85843  13
  -1  -2  -3 27.5602 4.93358  13
  -1   2  -3 29.3446 4.25158  12
   1   2   3 22.1064 2.93276  11
   1  -2   3 15.4228 3.94177  12
  -1  -2  -3 26.6743 3.08356  11
  -1   2  -3 21.8021 3.91737  11
   1  -2   3 18.7846 4.74133   5
   1   2   3 28.6742 6.89368   5
  -1   2  -3 28.0227 5.23515   5
   1   2   3 25.4914 4.08080  10
  -1   2  -3 25.1307 3.95251  10
   1  -2   3 31.3918 4.19470  11
   1  -2   3 24.8368 3.83485  10
  -1  -2  -3 19.6302 3.75977  10
  -1   2  -3 21.6367 3.48534   9
   1  -2   3 17.6956 3.47114   9
  -1  -2  -3 17.5328 3.43296   9
   1   2   3 25.3315 3.68830   9
   1   2   3 19.9542 6.62823   7
  -1  -2  -3 23.7785 7.73594   7
  -1   2  -3 21.4021 4.46091   7
   1  -2   3 21.4644 4.35338   7
   1  -2   4 3051.47 245.219   4
   1   2   4 2965.36 245.227   2
  -1  -2  -4 3069.85 245.305   2
  -1   2  -4 2830.23 247.261   1
  -1  -2  -4 3067.66 246.895  13
  -1   2  -4 3119.00 246.498  12
   1  -2   4 3016.86 246.605  12
   1   2   4 3155.52 247.093  13
   1  -2   4 3200.40 246.695  13
  -1   2  -4 3075.82 246.122  11
  -1  -2  -4 3225.25 245.404  11
   1  -2   4 3110.75 246.123  11
   1   2   4 3118.84 245.324  11
  -1   2  -4 3024.34 247.129   5
   1  -2   4 3178.01 247.041   5
   1   2   4 3021.32 247.714   5
  -1   2  -4 3102.38 246.038  10
   1  -2   4 3065.27 246.066  10
  -1  -2  -4 3110.32 246.179  10
   1   2   4 3049.23 246.250  10
   1   2   4 3144.92 245.946   9
  -1  -2  -4 3039.29 245.841   9
  -1   2  -4 3159.35 245.782   9
   1  -2   4 3136.39 245.779   9
  -1  -2  -4 2786.13 247.705   7
  -1   2  -4 3221.38 246.973   7
   1  -2   4 3166.63 246.572   7
   1   2   4 3122.06 247.763   7
  -1  -2  -5 1314.40 104.911   2
   1   2   5 1308.42 104.840   2
  -1   2  -5 1170.10 107.060   1
  -1   2  -5 1272.42 106.099  12
   1   2   5 1329.85 106.787  13
  -1  -2  -5 1258.04 106.528  13
   1  -2   5 1298.03 106.401  13
   1  -2   5 1298.08 106.348  12
  -1  -2  -5 1360.09 104.679  11
   1   2   5 1298.69 104.627  11
  -1   2  -5 1316.53 105.581  11
   1  -2   5 1360.00 105.658  11
   1   2   5 1199.67 107.341   5
   1  -2   5 1262.23 106.676   5
  -1   2  -5 1308.22 107.075   5
   1   2   5 1296.59 105.706  10
  -1  -2  -5 1371.66 105.674  10
   1  -2   5 1312.93 105.500  10
  -1   2  -5 1359.66 105.519  10
  -1   2  -5 1320.53 105.094   9
  -1  -2  -5 1318.11 105.234   9
   1   2   5 1290.37 105.298   9
   1  -2   5 1350.53 105.143   9
   1   2   5 1383.88 107.490   7
   1  -2   5 1300.68 106.235   7
  -1  -2  -5 1202.83 107.523   7
  -1   2  -5 1285.66 106.753   7
  -1  -2  -6 234.696 20.3614   2
   1   2   6 232.230 20.3204   2
   1   2   6 224.960 22.4180  13
  -1  -2  -6 216.232 22.0592  13
   1  -2   6 236.527 22.0409  12
   1  -2   6 261.820 22.3178  13
  -1   2  -6 237.060 21.8445  13
   1   2   6 249.416 19.7958  11
   1  -2   6 249.889 20.9834  11
  -1   2  -6 238.536 20.8856  11
  -1  -2  -6 250.314 19.8319  11
   1  -2   6 218.724 22.4713   5
  -1   2  -6 237.026 23.1166   5
   1   2   6 252.972 21.2126  10
   1  -2   6 252.242 20.8960  10
  -1  -2  -6 232.713 20.9033  10
  -1   2  -6 241.841 20.8180  10
  -1  -2  -6 236.201 20.4502   9
   1  -2   6 245.105 20.3551   9
  -1  -2  -6 240.756 19.7020   8
   1   2   6 245.702 20.6229   9
   1  -2   6 227.542 21.8332   7
  -1  -2  -6 229.143 23.7041   7
  -1   2  -6 244.394 22.6543   7
  -1  -2  -7 5.45325 2.41444   2
   1   2   7 7.49064 2.76469   2
   1  -2   7 7.59896 4.74285  13
   1   2   7 0.82178 4.61816  13
   1  -2   7 1.43728 4.78436  12
  -1   2  -7 4.46339 2.91833  11
  -1  -2  -7 7.12072 1.74638  11
   1   2   7 4.21764 1.71512  11
  -1   2  -7 11.7429 6.74397   5
   1   2   7 4.15970 3.42174  10
   1  -2   7 9.04706 3.12521  10
   1  -2   7-0.41972 3.56914  11
  -1   2  -7 7.33881 3.03731  10
  -1  -2  -7 6.74155 3.18051  10
   1  -2   7 3.67116 2.28454   9
   1   2   7 0.33140 2.67039   9
  -1  -2  -7 14.2292 7.74905   7
  -1   2  -7 6.98813 5.93794   7
  -1  -2  -7 7.50096 1.68268   8
   1   2   8 179.865 15.8944   2
   1  -2   8 138.923 17.4858  13
   1   2   8 159.065 18.1486  13
   1  -2   8 147.297 17.4057  12
  -1   2  -8 175.434 16.2502  11
  -1  -2  -8 197.637 14.8750  11
   1   2   8 180.723 14.8605  11
  -1   2  -8 169.794 19.2037   5
   1   2   8 196.250 16.6514  10
   1  -2   8 179.622 16.2856  11
   1  -2   8 172.472 16.0737  10
  -1   2  -8 180.683 16.0802  10
  -1  -2  -8 178.470 16.2623  10
  -1  -2  -8 174.623 14.9288   8
   1  -2   8 172.221 15.3671   9
   1   2   8 191.780 15.9048   9
  -1   2  -8 149.310 18.3651   7
  -1  -2  -8 162.545 19.6354   7
   1   2   9 1279.43 112.019   2
   1  -2   9 1400.70 114.575  13
   1   2   9 1301.90 113.903  12
   1   2   9 1436.00 114.798  13
  -1  -2  -9 1439.33 110.900  11
  -1   2  -9 1369.88 112.210  11
   1   2   9 1439.58 110.973  11
  -1   2  -9 1344.85 115.660   5
   1   2   9 1579.77 115.389   6
   1  -2   9 1430.54 112.388  11
   1   2   9 1389.73 112.622  10
  -1  -2  -9 1353.07 112.300  10
   1  -2   9 1413.91 112.304  10
  -1   2  -9 1324.71 112.088  10
   1  -2   9 1357.62 111.413   9
   1   2   9 1427.25 111.903   9
  -1  -2  -9 1367.81 111.110   8
   1  -2   9 1373.79 111.850   8
  -1  -2  -9 1286.04 115.687   7
  -1   2  -9 1397.91 115.281   7
   1   2  10 438.618 38.0194   2
   1  -2  10 488.919 41.2748  13
   1   2  10 422.501 40.5850  13
   1   2  10 435.499 40.0885  12
  -1  -2 -10 465.260 36.5487  11
  -1   2 -10 444.786 38.0238  11
   1   2  10 488.650 41.2887   6
  -1   2 -10 434.685 41.9924   5
   1   2  10 445.408 38.4700  10
   1   2  10 459.509 36.6248  11
  -1   2 -10 463.979 38.0759  10
   1  -2  10 479.280 38.2337  11
   1  -2  10 431.475 37.9927  10
  -1  -2 -10 440.464 36.8779   8
   1  -2  10 434.561 37.6045   8
   1  -2  10 448.597 37.0857   9
   1   2  10 473.547 37.6721   9
  -1  -2 -10 380.857 41.6021   7
  -1   2 -10 489.020 42.1586   7
  -1  -2 -11 45.1170 5.03590   4
   1   2  11 26.7128 7.00981  12
   1  -2  11 46.2953 8.68233  13
   1   2  11 58.7072 9.54716  13
  -1  -2 -11 45.7405 4.13585  11
  -1   2 -11 48.3299 5.99380  11
  -1   2 -11 36.4330 10.1515   5
   1   2  11 33.9482 8.49681   6
   1  -2  11 39.6153 5.80784  10
   1   2  11 44.5448 4.20798  11
  -1   2 -11 38.2031 5.62797  10
   1  -2  11 40.4221 5.87734  11
   1  -2  11 33.4959 5.16832   8
   1  -2  11 39.3984 4.68573   9
   1   2  11 43.1524 5.33945   9
  -1   2 -11 45.0703 10.2008   7
  -1  -2 -11 33.3035 10.1723   7
  -1  -2 -12 603.269 46.7659   4
   1   2  12 563.867 51.3875  13
   1   2  12 589.159 50.4397  12
   1  -2  12 509.794 50.6504  13
  -1  -2 -12 576.194 45.9238  11
  -1   2 -12 566.201 47.6946  11
  -1  -2 -12 513.143 52.8388   5
   1   2  12 605.741 51.6914   6
  -1   2 -12 567.842 52.9890   5
   1   2  12 568.098 45.9841  11
   1  -2  12 566.046 47.7603  11
   1  -2  12 575.613 47.8323  10
   1   2  12 607.629 47.1752   9
   1  -2  12 560.830 46.4895   9
   1  -2  12 557.548 47.2552   8
  -1   2 -12 523.492 51.9453   7
  -1  -2 -12 558.093 53.2319   7
  -1  -2 -13 58.5477 5.69589   4
   1   2  13 65.2238 11.0547  13
   1  -2  13 46.7373 9.52365  13
   1   2  13 58.0451 9.97709  12
  -1   2 -13 48.1823 6.52443  11
  -1  -2 -13 53.9702 13.2172   5
  -1   2 -13 53.4827 12.4642   5
   1   2  13 56.6107 10.6953   6
   1  -2  13 50.9790 6.88818  10
   1  -2  13 57.2666 5.43970   9
   1   2  13 42.4978 5.82930   9
   1  -2  13 43.8540 6.12439   8
  -1  -2 -13 55.9788 12.4609   7
  -1   2 -13 46.2334 11.4263   7
  -1  -2 -14 88.0702 8.04513   4
   1   2  14 89.8661 12.9083  12
   1   2  14 75.2212 13.1096  13
   1  -2  14 85.6169 13.5862  13
  -1   2 -14 97.2429 9.56271  11
  -1   2 -14 68.7347 14.2007   5
  -1  -2 -14 49.4768 13.6786   5
   1   2  14 83.9063 13.7679   6
   1  -2  14 79.2034 9.47108  10
   1   2  14 86.1304 8.54237   9
  -1   2 -14 88.4179 15.1063   7
  -1  -2 -14 99.9570 16.3994   7
  -1   2 -15 130.451 12.7647  11
  -1  -2 -15 135.966 21.4950   5
   1   2  15 144.380 18.0690   6
  -1   2 -15 130.739 19.7090   5
   1   2  15 129.108 17.2090  13
   1  -2  15 119.994 17.2750  13
   1   2  15 103.975 15.7888  12
  -1   2 -15 125.323 19.3502   7
  -1  -2 -15 119.474 20.2195   7
   1  -2  15 127.845 13.1085  10
  -1  -2 -16 226.437 30.5408   5
  -1   2 -16 299.671 31.6343   5
   1   2  16 263.288 28.2407   6
  -1   2 -16 239.877 29.6017   7
  -1  -2 -16 262.506 31.3458   7
   1   2  16 276.887 28.2797  13
   1   2  16 236.874 26.4687  12
   1  -2  16 223.440 27.0953  13
  -1  -2 -17 80.9307 16.6500   5
  -1   2 -17 52.3121 15.1024   5
   1   2  17 71.8220 14.2581   6
  -1  -2 -17 55.2450 16.3395   7
  -1   2 -17 53.3593 15.7050   7
   1   2  17 62.0247 12.0275  12
   1   2  17 37.6074 11.8500  13
   1  -2  17 83.2487 14.0834  13
  -1   2 -18 272.283 35.0157   5
   1   2  18 309.762 33.1996   6
  -1  -2 -18 282.681 36.0108   5
  -1  -2 -18 248.981 35.0837   7
  -1   2 -18 306.747 35.4465   7
   1   2  18 272.331 32.1630  13
   1  -2  18 350.153 33.6076  13
   1   2  18 327.143 31.7254  12
   1   2  19 154.812 21.5003   6
  -1   2 -19 197.630 26.0656   5
  -1  -2 -19 190.474 27.4099   5
   1  -2  19 204.839 22.9324   6
  -1   2 -19 144.338 24.8233   7
  -1  -2 -19 105.475 23.7083   7
   1  -2  19 138.224 21.3248  13
   1   2  19 157.853 20.4052  12
   1   2  19 157.777 21.8004  13
   1  -2  19 140.609 20.4242  12
  -1   2 -20 223.060 30.6285   5
   1   2  20 239.364 28.2691   6
  -1  -2 -20 205.508 31.4566   5
   1  -2  20 258.129 28.7838  13
   1  -2  20 185.527 25.5796  12
   1   2  20 256.192 28.4479  13
   1   2  20 214.025 26.1487  12
  -1  -2 -20 182.842 30.7130   7
  -1   2 -20 245.040 31.8969   7
  -1  -2 -21 219.189 29.3061   1
  -1   2 -21 230.751 34.0878   5
   1   2  21 260.790 31.4975   6
  -1  -2 -21 246.859 34.8956   5
   1  -2  21 304.954 31.5291  12
   1   2  21 286.816 30.7062  12
   1  -2  21 335.703 33.4019  13
   1   2  21 247.105 31.0636  13
  -1   2 -21 229.573 33.9527   7
  -1  -2 -21 274.121 36.8616   7
  -1  -2 -22 44.0576 13.0057   1
  -1   2 -22 53.9188 17.6871   5
   1   2  22 49.1889 14.8796   6
  -1  -2 -22 52.9486 19.5756   5
   1   2  22 51.2464 15.1537  13
   1  -2  22 45.9781 15.0320  13
   1   2  22 36.2387 12.7241  12
   1  -2  22 45.3582 12.9306  12
  -1  -2 -22 31.3790 17.8617   7
  -1   2 -22 22.0766 15.3955   7
  -1  -2 -23 12.2401 10.7754   1
  -1   2 -23 3.80263 15.5299   5
  -1  -2 -23-3.99063 16.2967   5
   1   2  23 14.3020 10.9657  13
   1  -2  23-2.51587 10.4864  12
   1  -2  23 2.86194 10.9716  13
   1   2  23 16.7505 10.7131  12
  -1   2 -23-3.87642 15.5114   7
  -1  -2 -23 24.7843 18.1661   7
  -1  -2 -24 348.625 39.9482   1
  -1   2 -24 349.889 46.1304   5
  -1  -2 -24 421.336 48.5541   5
   1  -2  24 344.191 41.8070  13
   1   2  24 403.657 40.7452  12
   1  -2  24 381.155 41.0373  12
   1   2  24 410.591 43.3744  13
  -1   2 -24 310.468 45.5786   7
  -1  -2 -24 378.921 47.9887   7
  -1  -2 -25 8.17354 12.6069   1
  -1  -2 -25 13.2875 17.7304   5
  -1   2 -25 38.1273 19.5784   5
  -1  -2 -25 4.61392 16.8627   7
  -1   2 -25 13.2133 17.6317   7
   1  -2  25 3.17922 11.3411  13
   1   2  25 13.2901 10.6604  12
   1  -2  25 22.1821 13.0273  12
   1   2  25-3.18987 13.8021  13
  -1   2 -26-4.45319 15.8485   5
   1  -3 -27 39.2080 14.7884   1
   1  -3 -26 10.6298 10.8670   1
   1  -3 -26 26.9879 19.4398   5
   1   3 -26 21.4312 18.1924   5
  -1   3  26 7.87312 10.7322  12
  -1  -3  26 13.4711 12.6156  13
  -1  -3  26 2.84298 10.9057  12
   1   3 -26-8.16528 17.6470   7
   1  -3 -26 4.47312 17.9002   7
   1  -3 -25-2.51294 10.0493   1
   1   3 -25 12.2301 16.6386   5
   1  -3 -25 8.58468 16.8034   5
  -1  -3  25-9.64017 12.0203  13
  -1  -3  25 19.0466 11.7528  12
  -1   3  25-7.48348 13.1962  12
   1   3 -25 15.3414 15.9636   7
   1  -3 -25 12.6229 18.1742   7
   1  -3 -24 4.76139 10.2898   1
   1  -3 -24-4.08824 16.3527   5
   1   3 -24 3.86658 16.0978   5
  -1   3  24 2.36481 10.2212  12
  -1  -3  24-5.19555 11.0248  12
  -1  -3  24 21.4276 12.4990  13
   1   3 -24 17.9797 14.6810   7
   1  -3 -24 3.94883 16.4400   7
   1  -3 -23 29.2560 11.7684   1
   1   3 -23 61.9969 19.0978   5
   1  -3 -23 27.1728 16.7734   5
  -1  -3  23 44.5509 14.3591  12
  -1   3  23 42.5445 12.4064  12
  -1  -3  23 37.8257 14.9874  13
   1   3 -23 51.2349 17.4830   7
   1  -3 -23 45.0403 18.1496   7
   1  -3 -22 2.12455 8.85164   1
   1  -3 -22-3.66654 14.6674   5
   1   3 -22 3.43789 14.0368   5
  -1  -3  22 11.7634 9.61030  12
  -1   3  22 6.34672 8.29133  12
  -1  -3  22 5.52050 11.2725  13
   1  -3 -22 17.5027 15.6556   7
   1   3 -22-3.18389 11.6294   7
   1  -3 -21 124.371 18.6472   1
   1  -3 -21 141.922 24.5222   5
   1   3 -21 100.229 21.2977   5
  -1   3  21 155.999 19.5650   6
  -1  -3  21 129.454 19.4212  12
  -1   3  21 117.758 18.2920  12
  -1  -3  21 107.106 19.0288  13
   1  -3 -21 136.776 24.0598   7
   1   3 -21 121.378 21.9950   7
   1  -3 -20 3.77848 9.25277   1
   1   3 -20-3.02940 12.1142   5
  -1   3  20 1.92769 7.70860   6
   1  -3 -20 6.13641 12.2694   7
   1   3 -20-10.9775 13.2529   7
  -1  -3  20-2.11293 8.96192  12
  -1  -3  20 12.3359 10.8451  13
  -1   3  20 1.87902 8.53974  12
   1   3 -19 22.6263 13.8782   5
  -1   3  19 12.7432 8.44933   6
   1  -3 -19 5.67463 13.1292   7
   1   3 -19 7.60779 10.1768   7
  -1  -3  19 16.2761 10.6018  13
  -1  -3  19 11.9719 8.34868  12
  -1   3  19 5.29604 7.80693  12
   1   3 -18 197.368 25.9580   5
  -1   3  18 179.222 21.2411   6
   1  -3 -18 159.968 18.8741   2
   1   3 -18 128.463 22.1970   7
   1  -3 -18 190.746 25.2896   7
  -1  -3  18 153.538 21.4029  12
  -1  -3  18 170.495 22.6094  13
  -1   3  18 195.259 21.2159  12
  -1  -3  17 239.866 24.8767   6
  -1   3  17 254.229 26.7635   6
   1   3 -17 243.743 29.7483   5
  -1  -3  17 262.172 28.2494  13
  -1  -3  17 249.650 26.9563  12
  -1   3  17 252.145 26.3744  12
   1  -3 -17 209.611 28.7324   7
   1   3 -17 257.896 28.8418   7
   1  -3 -17 225.975 24.2524   2
   1  -3 -16 16.3809 6.10500   2
  -1  -3  16 4.93582 7.28169  12
  -1   3  16 18.7464 8.11405  12
  -1  -3  16 9.52276 9.36618  13
  -1   3  16 12.7089 8.55543  13
  -1  -3  16 9.32121 6.22169   6
   1   3 -16 2.24817 9.21461   5
  -1   3  16 6.10053 6.75746   6
   1   3 -16 8.69120 4.20638  11
   1  -3 -16 11.4052 4.25588   8
   1  -3 -16 17.8191 10.6353   7
   1   3 -16 15.5047 8.41394   7
   1  -3 -15 196.435 18.4628   2
   1  -3 -15 177.225 15.9432   4
  -1   3  15 128.146 19.7024  13
  -1  -3  15 202.501 21.1357  12
  -1  -3  15 184.411 21.2592  13
  -1   3  15 147.373 18.6212  12
   1   3 -15 161.845 16.3764  11
   1   3 -15 164.650 21.3865   7
   1  -3 -15 152.451 21.5522   7
   1  -3 -15 167.040 16.4521   8
  -1   3  15 165.496 19.5557   6
  -1  -3  15 222.777 19.3975   6
   1   3 -15 132.082 21.3106   5
   1  -3 -14 4.20796 3.22086   4
   1  -3 -14 2.81417 4.12958   2
  -1   3  14-1.56512 6.76394  13
  -1  -3  14 1.64382 7.35275  13
  -1   3  14 1.23998 5.26411  12
  -1  -3  14 15.6706 7.44928  12
  -1   3  14-5.32510 6.43280   6
   1   3 -14 1.88838 8.44574   5
   1   3 -14 1.30373 3.53671  11
  -1  -3  14 3.53788 2.31923  10
   1  -3 -14 7.42851 3.78805   8
  -1   3  14 2.85110 1.97158   9
   1  -3 -14 3.73113 8.48158   7
   1   3 -14-4.83771 7.79052   7
  -1  -3  13 461.177 37.2593   4
   1  -3 -13 469.091 40.2051   2
   1  -3 -13 492.344 38.8927   4
  -1  -3  13 528.310 42.8415  12
  -1  -3  13 475.568 43.0574  13
  -1   3  13 442.797 42.3882  13
  -1   3  13 394.807 40.8053  12
   1   3 -13 491.050 39.4177  11
   1  -3 -13 433.896 38.3160  10
   1   3 -13 448.846 37.6267  10
  -1  -3  13 466.651 37.6391  10
   1   3 -13 487.223 42.9637   7
   1  -3 -13 503.759 44.5746   7
  -1   3  13 454.065 37.5486   9
   1  -3 -13 447.179 37.4309   9
   1  -3 -13 480.109 39.1400   8
  -1   3  13 431.357 41.5544   6
   1   3 -13 403.980 43.1648   5
  -1  -3  12 52.5845 4.87617   4
   1  -3 -12 39.1578 6.61171   2
   1  -3 -12 48.0324 6.16994   4
  -1   3  12 57.2424 9.64077  13
  -1  -3  12 39.7622 8.57872  12
  -1  -3  12 42.9557 9.59014  13
  -1   3  12 58.5053 8.62948  12
  -1   3  12 33.3778 8.15435   6
   1   3 -12 46.1960 10.4416   5
   1  -3 -12 36.9711 10.9563   5
   1   3 -12 35.8366 6.23316  11
  -1  -3  12 53.8841 5.09657  10
   1  -3 -12 36.6878 5.43839  10
   1   3 -12 45.9046 5.03832  10
   1  -3 -12 39.3290 4.76031   9
  -1   3  12 48.1484 5.12578   9
   1  -3 -12 47.3667 9.75178   7
   1  -3 -12 46.4116 6.28709   8
   1   3 -12 27.4469 8.06282   7
   1  -3 -11 5.86266 3.62918   2
  -1  -3  11 9.34076 2.27627   4
   1  -3 -11 10.1177 3.54492   4
  -1   3  11 6.08771 6.30855  13
  -1   3  11 8.55243 5.11478  12
  -1  -3  11 7.67927 5.75901  12
  -1   3  11 2.13153 5.31895   6
   1   3 -11 5.49142 7.36803   5
   1  -3 -11 4.78122 7.26314   5
   1   3 -11 4.16207 3.43966  11
   1  -3 -11 4.25181 2.65225  10
  -1  -3  11 5.81165 2.08100  10
   1   3 -11 7.48047 2.22354  10
  -1   3  11 8.48360 2.41976   9
   1  -3 -11 10.6139 2.43650   9
  -1   3  11 1.86423 2.74325   8
   1  -3 -11 6.78736 7.36968   7
   1   3 -11 2.35012 5.78004   7
   1  -3 -11 6.32180 3.40136   8
   1  -3 -10 8.66192 3.91349   2
  -1  -3  10 9.61866 2.51086   4
   1  -3 -10 15.2620 4.21318   4
  -1   3  10 5.52779 5.59007  13
  -1   3  10 9.42404 5.10473  12
  -1  -3  10 22.8475 6.72073  12
   1   3 -10 15.6272 6.50675   7
  -1   3  10 6.88577 5.88577   6
   1  -3 -10 14.3118 8.16242   5
   1   3 -10 13.3222 6.85934   5
   1  -3 -10 17.2047 3.32676  10
  -1  -3  10 14.1726 2.59422  10
   1   3 -10 20.4741 4.55283  11
  -1  -3  10 13.3462 3.70908  11
   1   3 -10 13.9166 2.52965  10
  -1  -3  10 14.7727 2.05937   9
   1   3 -10 15.5769 2.05048   9
  -1   3  10 13.3650 2.95161   9
   1  -3 -10 10.7743 2.67292   9
   1  -3 -10 8.89197 3.75827   8
  -1   3  10 10.1815 3.20257   8
   1  -3 -10 20.6390 7.08663   7
   1  -3  -9 86.5244 9.65089   2
  -1   3   9 86.2192 10.3639   3
   1  -3  -9 82.9314 9.24591   4
  -1   3   9 83.6137 11.5333  13
  -1   3   9 90.2267 10.5948  12
  -1  -3   9 104.546 11.5027  12
   1  -3  -9 69.9741 12.6663   5
  -1   3   9 94.4778 11.3898   6
  -1  -3   9 84.6726 8.09626   4
   1   3  -9 86.4344 11.8833   5
   1   3  -9 75.7462 10.7433   7
   1  -3  -9 94.8701 8.87352  10
   1   3  -9 85.7588 8.03758  10
  -1  -3   9 78.5511 9.19914  11
   1   3  -9 88.7104 9.66420  11
  -1  -3   9 90.3944 8.07136  10
  -1  -3   9 90.1088 7.75764   9
  -1   3   9 86.8081 8.45665   9
   1   3  -9 86.2660 7.70852   9
   1  -3  -9 92.3381 8.46377   9
   1  -3  -9 77.9675 8.99695   8
   1  -3  -9 66.5920 11.1381   7
  -1   3   8 289.587 25.3419   3
   1  -3  -8 269.407 24.3067   4
   1  -3  -8 258.434 24.4242   2
  -1   3   8 291.432 25.3519  12
  -1  -3   8 301.925 26.0341  12
  -1   3   8 276.789 26.0849  13
   1  -3  -8 265.941 27.1250   5
  -1   3   8 272.872 25.8512   6
   1   3  -8 259.372 26.1763   5
  -1  -3   8 273.790 23.3579   4
  -1  -3   8 278.069 27.5904   1
   1  -3  -8 273.498 25.2581   1
  -1   3   8 271.304 24.1094   2
   1   3  -8 288.267 23.2147  10
  -1  -3   8 246.541 24.1033  11
  -1  -3   8 288.810 23.2592  10
   1   3  -8 258.987 24.3890  11
   1   3  -8 283.906 23.0798   9
  -1  -3   8 289.504 23.0754   9
  -1  -3   8 282.109 24.6460   8
   1  -3  -8 300.159 23.6799   9
  -1   3   8 288.448 23.6688   9
   1  -3  -8 280.412 24.1923   8
   1  -3  -8 268.434 26.3195   7
   1  -3  -7 6031.42 449.610   4
   1  -3  -7 5610.12 449.823   3
   1  -3  -7 5598.30 449.596   2
  -1   3   7 5903.44 450.188   3
  -1   3   7 5260.49 449.123   2
   1  -3  -7 5628.60 450.094   1
  -1  -3   7 5532.30 452.026   1
  -1   3   7 5785.48 451.091  13
  -1  -3   7 5696.76 450.741  12
  -1   3   7 5658.97 450.135  12
   1  -3  -7 5626.52 450.103  12
   1  -3  -7 5297.82 450.608   6
  -1   3   7 5703.60 450.842   6
   1   3  -7 5643.25 450.881   5
   1  -3  -7 5604.80 451.722   5
   1   3  -7 5531.20 448.461  10
  -1  -3   7 5939.56 448.599  10
  -1  -3   7 5274.65 449.375  11
   1   3  -7 5491.95 449.662  11
  -1  -3   7 5588.46 448.452   9
   1   3  -7 5618.88 448.510   9
   1  -3  -7 5759.56 448.923   9
  -1  -3   7 5851.70 449.806   8
  -1   3   7 5666.06 448.948   9
  -1   3   7 5682.37 450.261   7
   1  -3  -7 5788.42 449.353   8
   1  -3  -7 5699.43 451.014   7
   1  -3  -6 1147.08 89.2206   4
   1   3  -6 1116.52 89.8847   3
   1  -3  -6 1143.07 89.1230   2
  -1   3   6 1117.49 89.4937   3
  -1  -3   6 1100.09 89.7246   2
   1  -3  -6 1078.33 89.1389   3
   1  -3  -6 1077.37 89.3668   1
  -1   3   6 1017.26 88.6911   2
  -1  -3   6 1100.65 91.4125   1
   1   3  -6 1095.15 90.8481   1
  -1  -3   6 1110.74 90.0070  12
  -1   3   6 1091.05 89.4449  12
  -1   3   6 1082.61 90.1928  13
   1  -3  -6 1120.40 89.4603  12
   1  -3  -6 1078.23 90.0656  13
   1   3  -6 1115.36 89.7887  12
   1  -3  -6 1099.97 90.1855   6
   1  -3  -6 1091.18 90.8645   5
   1   3  -6 1114.89 90.0410   5
  -1   3   6 1142.31 90.2946   6
  -1   3   6 994.631 90.0119   5
  -1  -3   6 1136.15 88.2592  10
  -1  -3   6 1082.66 89.0262  11
   1   3  -6 1122.10 89.2935  11
   1   3  -6 1088.35 88.1255  10
  -1  -3   6 1060.44 88.1629   9
   1   3  -6 1108.49 88.2647   9
  -1   3   6 1099.16 88.6157   9
   1  -3  -6 1128.92 88.5950   9
  -1   3   6 1091.12 89.5304   7
   1  -3  -6 1087.28 90.1628   7
   1  -3  -6 1176.31 88.9769   8
   1  -3  -5 508.975 44.4624   3
   1   3  -5 534.220 45.1450   3
  -1   3   5 568.591 44.8936   3
   1  -3  -5 516.461 44.6967   1
   1  -3  -5 590.388 44.6698   2
   1   3  -5 530.504 46.0740   1
  -1  -3   5 517.356 46.3422   1
  -1   3   5 572.912 44.9227  12
   1  -3  -5 510.260 44.6811  12
  -1   3   5 575.252 45.7099  13
   1  -3  -5 546.755 45.4622  13
   1  -3  -5 521.858 43.5547  11
   1   3  -5 533.597 45.2285  12
  -1  -3   5 552.354 45.3321  12
  -1   3   5 554.680 43.5631  11
   1  -3  -5 556.725 45.6410   6
  -1   3   5 532.696 45.6305   6
   1   3  -5 544.839 45.3217   5
   1  -3  -5 523.557 45.9094   5
  -1   3   5 543.639 45.5389   5
  -1  -3   5 555.149 43.9657  10
   1   3  -5 534.275 44.8030  11
  -1  -3   5 531.145 44.6320  11
  -1   3   5 540.981 44.3145   9
  -1  -3   5 529.992 43.9407   9
   1  -3  -5 542.763 44.2517   9
   1   3  -5 525.471 44.0044   9
  -1   3   5 558.613 45.0055   7
   1  -3  -5 573.295 44.5303   8
   1  -3  -5 534.126 45.3747   7
   1  -3  -4 421.166 35.6641   3
   1   3  -4 474.632 36.4342   3
  -1   3   4 418.392 35.8006   3
  -1   3   4 453.039 36.0412   1
  -1  -3   4 399.068 37.1895   1
   1  -3  -4 477.083 35.9895   2
   1  -3  -4 433.598 35.9112   1
   1   3  -4 439.153 37.1139   1
  -1   3   4 426.506 35.9255  12
  -1   3   4 423.944 36.6630  13
   1  -3  -4 441.438 35.9030  12
   1  -3  -4 426.664 36.4494  13
  -1  -3   4 440.326 36.5009  12
   1  -3  -4 452.285 35.1678  11
  -1   3   4 427.745 35.1166  11
   1  -3  -4 440.356 36.8254   5
  -1   3   4 481.966 37.0150   6
  -1  -3   4 410.273 34.9896   6
  -1   3   4 449.757 36.6275   5
   1  -3  -4 406.895 36.5976   6
  -1  -3   4 429.210 35.4007  10
  -1  -3   4 444.931 36.0738  11
   1  -3  -4 428.560 35.7746  10
   1   3  -4 463.579 36.2478  11
   1   3  -4 437.852 35.5605   9
  -1  -3   4 423.922 35.4396   9
  -1   3   4 427.797 35.7475   9
   1  -3  -4 448.685 35.7382   9
  -1   3   4 431.651 35.9514   7
   1  -3  -4 385.303 35.6886   8
   1  -3  -4 423.632 36.2530   7
   1   3  -3 453.339 38.8077   3
  -1   3   3 482.543 38.6074   3
   1  -3  -3 467.597 38.4818   3
  -1   3   3 484.459 38.7143   1
   1  -3  -3 479.111 38.6735   1
  -1  -3   3 445.419 39.6587   1
   1   3  -3 445.307 39.4194   1
   1  -3  -3 476.690 38.6155  12
  -1   3   3 503.655 39.4674  13
   1  -3  -3 489.435 39.1667  13
  -1   3   3 483.164 38.7270  12
   1  -3  -3 467.206 38.2566  11
  -1  -3   3 410.819 39.0493  12
  -1   3   3 497.929 38.3012  11
   1  -3  -3 470.617 39.3689   6
  -1   3   3 484.724 39.5879   6
  -1  -3   3 475.529 38.0554   6
   1   3  -3 465.407 38.0352   6
   1  -3  -3 470.659 39.2234   5
  -1   3   3 508.375 39.1095   5
   1   3  -3 493.172 39.0661  11
   1  -3  -3 444.005 38.7004  10
  -1  -3   3 452.920 38.9045  11
   1   3  -3 480.171 38.6285   9
   1  -3  -3 438.048 38.6064   9
  -1   3   3 462.428 38.7457   9
  -1  -3   3 465.373 38.4840   9
  -1   3   3 490.668 38.5768   7
   1  -3  -3 464.460 38.7701   7
   1   3  -2 964.599 76.2322   3
   1  -3  -2 959.874 76.0510   3
  -1   3   2 909.670 76.0288   3
  -1   3   2 929.516 76.1108   1
  -1  -3   2 917.051 76.9540   1
   1  -3  -2 928.915 76.1514   1
   1  -3  -2 1028.88 76.7605  13
  -1   3   2 981.793 76.9113  13
   1  -3  -2 946.552 76.1243  12
  -1   3   2 909.824 76.0761  12
  -1   3   2 969.721 76.1747  11
   1  -3  -2 983.779 76.1824  11
   1   3  -2 1000.74 75.9797   6
   1  -3  -2 965.952 76.3969   5
  -1  -3   2 977.168 76.0169   6
  -1   3   2 854.450 76.7841   6
   1  -3  -2 914.173 76.4339  10
  -1   3   2 931.861 76.4310  10
  -1  -3   2 926.409 76.2877   9
   1  -3  -2 935.272 76.4543   9
   1   3  -2 963.010 76.3995   9
  -1   3   2 930.648 76.4708   9
   1  -3  -2 962.939 76.1082   7
   1   3  -2 784.009 78.5465   7
  -1   3   2 967.730 75.8818   7
  -1   3   1 1465.27 107.893   3
   1   3  -1 1362.25 107.522   3
   1  -3  -1 1463.95 108.001   1
  -1   3   1 1371.04 107.881   1
  -1  -3   1 1311.87 108.553   1
   1  -3  -1 969.541 108.408  13
   1  -3  -1 1359.35 107.963  11
  -1   3   1 1329.59 107.962  11
  -1  -3   1 1348.59 107.966   6
   1   3  -1 1425.49 108.028   6
   1  -3  -1 1491.07 107.612   5
  -1   3   1 1269.28 108.067  10
  -1   3   1 1296.57 108.115   9
  -1  -3   1 1359.61 108.053   9
   1   3  -1 1323.93 108.092   9
  -1  -3   1 1102.46 110.673   7
   1   3  -1 1070.65 111.184   7
  -1   3   0 4359.81 340.087  11
   1   3   0 4322.20 340.119  11
   1  -3   0 4176.61 340.208   6
   1   3   0 4346.74 340.325   6
  -1  -3   0 4342.25 340.293   6
   1   3   0 4590.20 340.130  11
   1   3   0 2438.50 342.973   7
  -1  -3   0 2878.92 343.578   7
  -1   3   0 4625.50 340.100   1
   1  -3   0 4389.26 340.100   1
  -1  -3  -1 5234.45 533.296   7
  -1   3  -1 7228.05 530.615   7
   1   3   1 7765.99 533.645   7
   1   3   1 7001.66 531.140  11
   1  -3   1 6660.30 531.071  12
  -1  -3  -1 6754.19 531.157  11
  -1  -3  -1 6388.94 531.622   6
   1   3   1 6578.13 531.739   6
   1   3   1 6763.84 531.844   5
   1  -3   1 6734.11 531.438   6
  -1   3  -1 6160.28 531.172  10
   1  -3   1 6706.53 531.320  10
   1   3   1 6568.15 531.266   9
  -1   3  -1 6741.53 531.270   9
   1  -3   1 6658.02 531.201   9
  -1   3  -1 6525.99 531.373   1
   1  -3   1 6363.00 531.478   1
  -1   3  -2 817.336 70.8871   1
   1  -3   2 890.668 71.2271   1
  -1  -3  -2 880.391 71.1786  13
   1   3   2 920.079 70.0021  11
  -1   3  -2 908.010 70.3556  12
   1  -3   2 862.209 70.3902  11
  -1  -3  -2 875.814 69.9917  11
   1  -3   2 893.589 70.3781  12
  -1  -3  -2 858.539 71.0091   6
  -1  -3  -2 905.768 71.7216   5
   1  -3   2 859.478 69.9363   5
  -1   3  -2 852.169 70.0097   5
   1   3   2 891.005 71.1674   5
  -1   3  -2 886.956 70.3280  10
   1  -3   2 852.733 70.3501  10
  -1  -3  -2 877.589 70.2881   9
   1  -3   2 839.352 70.1344   9
  -1   3  -2 854.006 70.2286   9
   1   3   2 845.592 70.3049   9
  -1  -3  -2 848.032 72.2556   7
  -1   3  -2 857.665 69.9461   7
   1   3   2 818.108 71.6410   7
  -1  -3  -3 1722.09 143.163   3
  -1   3  -3 1715.54 144.926   1
   1  -3   3 1726.71 145.152   1
   1  -3   3 1800.31 144.202  12
  -1  -3  -3 1753.49 144.599  13
  -1   3  -3 1820.64 144.125  11
  -1  -3  -3 1796.89 143.411  11
   1   3   3 1857.13 143.376  11
   1  -3   3 1793.84 144.059  11
  -1   3  -3 1866.49 144.210  12
  -1   3  -3 1737.35 144.086   5
   1   3   3 1748.40 145.118   5
  -1  -3  -3 1838.82 145.536   5
   1  -3   3 1784.95 143.963   5
   1  -3   3 1893.38 144.058  10
  -1   3  -3 1775.50 143.895  10
  -1  -3  -3 1835.37 144.087  10
  -1  -3  -3 1855.98 143.883   9
  -1   3  -3 1795.58 143.777   9
   1   3   3 1813.17 143.931   9
   1  -3   3 1786.75 143.759   9
  -1  -3  -3 1784.65 145.907   7
   1   3   3 1679.35 145.433   7
  -1   3  -3 1853.42 144.041   7
  -1  -3  -4 93.4787 7.83471   2
  -1  -3  -4 95.1425 8.55147   3
  -1   3  -4 83.9787 10.5157   1
   1  -3   4 84.2920 11.2446   1
  -1  -3  -4 77.5861 10.1707  13
  -1   3  -4 89.4585 9.34386  11
  -1   3  -4 101.858 9.84087  12
   1  -3   4 100.482 9.33670  11
  -1  -3  -4 83.2729 8.24151  11
   1   3   4 90.8017 8.15482  11
   1  -3   4 82.2553 9.70056  12
   1  -3   4 90.6463 9.80993   5
   1   3   4 92.7332 11.4655   5
   1   3   4 75.6870 10.7185   6
  -1  -3  -4 97.8969 12.2590   5
  -1   3  -4 100.231 10.4873   5
   1  -3   4 83.0908 9.01098  10
  -1   3  -4 92.1306 9.14074  10
  -1  -3  -4 90.2253 9.37767  10
   1   3   4 99.8344 9.11960   9
   1  -3   4 86.8276 8.76805   9
  -1  -3  -4 87.8975 8.94079   9
  -1   3  -4 95.4360 8.83675   9
   1   3   4 105.664 11.9447   7
  -1   3  -4 90.9445 9.79196   7
  -1  -3  -4 73.1886 11.9955   7
  -1  -3  -5 2308.56 182.589   2
  -1  -3  -5 2292.60 183.283   3
  -1   3  -5 2142.22 185.090   1
   1  -3   5 2186.29 185.455   1
   1   3   5 2222.06 182.431   2
   1  -3   5 2414.85 184.479  13
   1  -3   5 2379.58 184.379  12
  -1  -3  -5 2173.85 184.484  13
  -1   3  -5 2250.69 184.049  12
  -1   3  -5 2319.13 183.742  11
   1   3   5 2339.31 182.551  11
  -1  -3  -5 2266.64 182.591  11
   1  -3   5 2305.98 183.712  11
   1   3   5 2306.64 185.524   5
  -1  -3  -5 2300.84 185.825   5
   1   3   5 2116.04 184.823   6
  -1   3  -5 2305.77 184.668   5
   1  -3   5 2232.32 184.200   5
  -1   3  -5 2329.12 183.443  10
  -1  -3  -5 2285.45 183.625  10
   1  -3   5 2400.42 183.585  10
   1   3   5 2310.28 183.433   9
  -1  -3  -5 2310.21 183.299   9
  -1   3  -5 2356.96 183.193   9
   1  -3   5 2263.80 183.107   9
  -1   3  -5 2474.29 184.575   7
  -1  -3  -5 2215.15 185.848   7
   1   3   5 2312.44 185.484   7
  -1  -3  -6 1476.08 123.335   3
  -1  -3  -6 1595.82 122.660   2
   1  -3   6 1455.56 122.163   4
   1   3   6 1442.37 122.389   2
   1  -3   6 1508.66 124.425  12
   1  -3   6 1615.61 124.699  13
   1   3   6 1419.66 124.178  12
   1   3   6 1470.43 124.883  13
   1  -3   6 1553.02 123.641  11
  -1   3  -6 1530.71 123.677  11
   1   3   6 1555.41 122.223  11
  -1  -3  -6 1542.42 122.284  11
   1   3   6 1472.76 125.167   6
   1  -3   6 1481.44 124.505   5
  -1  -3  -6 1469.54 125.943   5
  -1   3  -6 1570.27 125.113   5
  -1  -3  -6 1513.07 123.503  10
   1  -3   6 1565.23 123.423  10
  -1   3  -6 1533.37 123.294  10
   1  -3   6 1533.57 122.930   9
  -1  -3  -6 1567.34 123.132   9
  -1   3  -6 1568.68 122.962   9
   1   3   6 1619.95 123.353   9
  -1  -3  -6 1627.22 122.427   8
  -1   3  -6 1651.02 124.874   7
  -1  -3  -6 1506.03 126.153   7
  -1  -3  -7 2799.05 228.401   3
  -1  -3  -7 2826.81 227.584   2
   1  -3   7 2805.87 226.749   4
  -1  -3  -7 2602.19 229.195   1
   1   3   7 2595.12 227.288   2
   1  -3   7 2991.90 229.705  12
   1   3   7 2794.41 230.056  13
   1   3   7 2817.25 229.351  12
   1  -3   7 2938.88 229.787  13
   1   3   7 2999.04 226.871  11
  -1  -3  -7 2758.70 226.877  11
  -1   3  -7 2979.44 228.515  11
  -1  -3  -7 2748.75 231.249   5
   1  -3   7 2677.38 229.452   5
  -1   3  -7 2851.71 230.353   5
   1   3   7 2706.57 230.111   6
   1  -3   7 2940.75 228.476  11
   1  -3   7 2919.08 228.254  10
  -1  -3  -7 2867.23 228.335  10
  -1   3  -7 2916.23 228.136  10
   1  -3   7 2787.59 227.618   9
  -1  -3  -7 3012.48 227.911   9
  -1   3  -7 2987.10 227.666   9
   1   3   7 2966.60 228.094   9
  -1   3  -7 2915.91 230.049   7
  -1  -3  -7 2766.18 231.195   7
  -1  -3  -7 2948.78 227.159   8
  -1  -3  -8 0.36915 2.52234   2
  -1  -3  -8-0.83641 5.01770   1
   1   3   8 0.94286 2.43509   2
   1  -3   8 0.85349 4.51569  12
   1   3   8-3.95242 5.81672  13
   1   3   8 0.81644 4.94305  12
   1  -3   8 0.89857 5.02906  13
  -1  -3  -8-0.12964 1.37389  11
   1   3   8 1.24690 1.37919  11
  -1   3  -8 3.13447 3.51732  11
  -1  -3  -8 2.65389 7.18519   5
  -1   3  -8 4.33865 6.07035   5
   1   3   8 14.4014 6.92455   6
   1  -3   8 1.58318 3.50048  11
  -1   3  -8 4.05886 2.99173  10
  -1  -3  -8 2.02078 3.37638  10
   1  -3   8-1.84746 2.89694  10
  -1  -3  -8 1.85042 2.71996   9
  -1   3  -8 1.55602 2.56679   9
   1   3   8-2.53154 3.32227   9
   1  -3   8 1.88755 2.21046   9
  -1  -3  -8 2.55878 1.91627   8
  -1  -3  -8 1.29964 7.79609   7
  -1   3  -8 3.89742 6.46182   7
  -1  -3  -9 1884.19 148.355   2
   1   3   9 1684.39 147.909   2
  -1  -3  -9 1860.53 150.510   1
   1  -3   9 1901.73 150.928  13
   1  -3   9 1848.19 150.494  12
   1   3   9 1783.88 150.211  12
   1   3   9 1802.24 151.048  13
  -1   3  -9 1848.58 148.796  11
  -1   3  -9 1794.47 151.658   5
   1   3   9 1792.16 151.148   6
   1  -3   9 1852.97 148.518  10
   1  -3   9 1859.22 148.899  11
  -1   3  -9 1821.72 148.437  10
  -1  -3  -9 1903.78 147.415   8
   1  -3   9 1836.09 147.764   9
  -1  -3  -9 1842.26 148.020   9
   1   3   9 1941.96 148.414   9
  -1   3  -9 1984.56 151.629   7
  -1  -3  -9 1863.60 152.768   7
  -1  -3 -10 1384.70 111.167   2
   1   3  10 1292.90 110.676   2
  -1  -3 -10 1348.38 113.355   1
   1  -3  10 1404.40 114.131  13
   1   3  10 1434.10 114.277  13
   1   3  10 1401.75 113.314  12
   1  -3  10 1379.35 113.523  12
  -1   3 -10 1393.31 111.477  11
  -1   3 -10 1456.03 115.373   5
   1   3  10 1338.76 114.123   6
  -1   3 -10 1345.81 111.071  10
   1  -3  10 1395.89 111.225  10
   1   3  10 1426.22 110.979   9
   1  -3  10 1352.48 110.264   9
  -1  -3 -10 1360.29 109.986   8
  -1   3 -10 1518.60 114.947   7
  -1  -3 -10 1316.63 115.539   7
   1   3  11 194.798 18.6342   2
  -1  -3 -11 184.325 21.0568   1
   1   3  11 216.497 22.3656  13
   1  -3  11 223.754 22.3743  13
   1   3  11 209.852 21.2956  12
  -1   3 -11 221.743 19.4419  11
   1   3  11 173.650 21.8356   6
  -1   3 -11 230.064 23.8112   5
   1  -3  11 200.554 18.9523  10
  -1   3 -11 223.948 19.1275  10
   1  -3  11 201.539 17.9450   9
  -1  -3 -11 215.252 17.8213   8
   1   3  11 220.632 18.8232   9
   1  -3  11 206.095 18.7771   8
  -1  -3 -11 229.579 24.1332   7
  -1   3 -11 209.067 22.8468   7
  -1  -3 -12-2.46175 6.43601   1
   1   3  12 14.1198 7.20003  13
   1  -3  12 8.25366 6.35455  13
   1   3  12 16.5408 6.17797  12
  -1   3 -12 5.57332 3.57901  11
   1   3  12 1.44585 6.78221   6
  -1   3 -12-3.41406 8.12690   5
   1  -3  12 1.13562 3.14887  10
   1  -3  12 0.30249 2.17445   9
   1  -3  12 3.09216 3.00982   8
  -1  -3 -12 1.69088 2.01381   8
   1   3  12 3.70406 2.83420   9
  -1   3 -12-1.57562 7.04683   7
  -1  -3 -12 1.89462 8.33027   7
  -1  -3 -13 241.390 20.3670   4
  -1  -3 -13 214.381 23.8726   1
   1   3  13 232.002 25.0488  13
   1   3  13 214.637 23.5287  12
   1  -3  13 221.758 24.5651  13
  -1   3 -13 229.997 21.2269  11
  -1   3 -13 219.336 26.2376   5
   1   3  13 221.757 24.8981   6
   1  -3  13 245.306 21.1705  10
   1   3  13 223.416 20.4336   9
  -1  -3 -13 248.158 27.2359   7
  -1   3 -13 262.740 26.5544   7
  -1  -3 -14 1.61782 2.62722   4
  -1  -3 -14-2.86577 6.92212   1
   1   3  14-2.75119 6.55003  12
   1  -3  14 1.62406 6.63103  13
   1   3  14 4.93024 6.43621  13
  -1   3 -14 3.93917 3.79411  11
   1   3  14 1.68010 7.51388   6
  -1   3 -14 8.16659 9.57534   5
   1  -3  14 8.09645 3.94237  10
   1   3  14 0.90785 3.01605   9
  -1  -3 -14 2.24666 8.98611   7
  -1   3 -14 3.87041 8.36083   7
   1  -3  15-1.75222 7.15520  13
   1   3  15 1.47622 6.60410  12
   1   3  15 8.81575 8.39514  13
  -1   3 -15 4.69518 3.83959  11
   1  -3  15 1.29883 3.60281  10
  -1  -3 -15 4.85954 9.91945   7
  -1   3 -15-2.12759 9.02708   7
  -1  -3 -15 3.07126 6.98298   1
  -1   3 -15 15.4885 10.9886   5
   1   3  15 3.60324 7.35670   6
  -1  -3 -16 811.625 69.9890   1
  -1   3 -16 804.554 73.2117   5
   1   3  16 814.271 71.2516   6
   1   3  16 743.734 70.6108  13
   1   3  16 833.830 69.8570  12
   1  -3  16 779.426 70.7177  13
  -1   3 -16 754.247 72.2243   7
  -1  -3 -16 771.776 73.6990   7
  -1  -3 -17 966.860 86.0404   1
  -1  -3 -17 926.397 90.1501   5
   1   3  17 942.251 87.1833   6
  -1   3 -17 1065.46 90.5580   5
   1  -3  17 1028.88 87.5438  13
   1   3  17 926.715 86.8250  13
   1   3  17 985.405 85.7824  12
  -1  -3 -17 1098.20 92.1710   7
  -1   3 -17 1052.89 90.1184   7
  -1  -3 -18 105.595 17.2823   1
  -1   3 -18 113.381 20.9486   5
  -1  -3 -18 84.7593 20.3701   5
   1   3  18 130.692 19.6247   6
   1   3  18 138.076 17.5333  12
   1   3  18 152.662 19.9833  13
   1  -3  18 116.389 18.6593  13
  -1  -3 -18 164.673 24.0988   7
  -1   3 -18 133.234 22.1707   7
  -1  -3 -19 569.406 55.1150   1
  -1  -3 -19 624.341 61.1998   5
   1   3  19 635.253 57.5509   6
  -1   3 -19 563.657 58.6753   5
   1   3  19 552.451 56.0209  13
   1  -3  19 624.588 56.9831  13
   1   3  19 571.674 54.5239  12
  -1  -3 -19 578.344 60.5244   7
  -1   3 -19 594.378 59.4400   7
  -1  -3 -20-2.07769 7.95741   1
   1   3  20 9.68521 10.4603   6
  -1  -3 -20-17.1115 16.0488   5
  -1   3 -20 12.5763 13.3370   5
   1  -3  20 4.88276 9.55948  13
   1   3  20 9.72986 10.1264  13
   1   3  20-4.04165 8.25026  12
  -1   3 -20 6.26441 12.7853   7
  -1  -3 -20 24.5466 15.9384   7
  -1  -3 -21 26.3240 12.0939   1
  -1  -3 -21 39.8583 17.3288   5
   1   3  21 30.4491 13.0508   6
  -1   3 -21 50.2430 18.0434   5
   1  -3  21 75.0661 15.6122  13
   1   3  21 77.2631 15.6788  13
   1   3  21 49.2156 12.6920  12
  -1  -3 -21 22.2861 16.9520   7
  -1   3 -21 26.9976 16.4193   7
  -1  -3 -22 176.006 22.7683   1
   1   3  22 195.912 25.3117   6
  -1  -3 -22 130.480 26.0809   5
  -1   3 -22 120.717 24.5741   5
   1   3  22 169.414 23.9413  13
   1  -3  22 131.260 21.6611  12
   1  -3  22 139.679 23.4555  13
   1   3  22 176.505 22.6270  12
  -1   3 -22 163.023 28.3931   7
  -1  -3 -22 143.428 27.2505   7
  -1  -3 -23 104.853 18.9578   1
  -1  -3 -23 109.271 25.0947   5
  -1   3 -23 45.0897 21.3861   5
   1  -3  23 74.2238 17.2615  12
   1   3  23 80.7868 19.5951  13
   1   3  23 124.189 18.8386  12
   1  -3  23 121.454 21.0033  13
  -1   3 -23 152.696 26.5160   7
  -1  -3 -23 130.054 27.6747   7
  -1  -3 -24-2.56969 9.89853   1
  -1  -3 -24 12.7865 15.9803   5
  -1   3 -24 47.7164 19.5051   5
   1   3  24 9.15947 12.9956  13
   1  -3  24 8.06395 12.0669  12
   1  -3  24 12.1901 12.7310  13
   1   3  24 42.8074 12.5501  12
  -1   3 -24 4.07568 15.6423   7
  -1  -3 -24 17.8933 17.5455   7
  -1  -3 -25-10.7947 13.3994   1
  -1  -3 -25-22.4388 17.9460   5
  -1   3 -25 16.7634 17.4430   5
  -1  -3 -25 4.68380 17.9326   7
  -1   3 -25 4.34055 14.1723   7
   1   3  25 5.29488 9.90310  12
   1   3  25 3.21338 12.8500  13
   1  -3  25 2.81666 11.2635  12
   1  -3  25-3.20208 12.8048  13
  -1   3 -26 141.046 28.0215   5
   1  -4 -26 5.24492 11.1341   1
   1  -4 -26-9.09790 20.6799   5
   1   4 -26 21.2583 16.2856   5
  -1  -4  26 40.3027 13.5079  12
  -1   4  26-2.61218 12.0719  12
  -1  -4  26 13.5689 13.2887  13
   1  -4 -26-9.07103 17.7620   7
   1   4 -26-8.18216 17.9901   7
   1  -4 -25 59.8930 15.1412   1
   1   4 -25 48.5372 19.9789   5
  -1  -4  25 35.6968 16.2240  13
  -1  -4  25 66.2472 16.1651  12
  -1   4  25 67.1045 15.0841  12
   1  -4 -25 51.2080 20.7404   7
   1   4 -25 30.7480 18.5053   7
   1  -4 -24 9.45921 10.7476   1
   1   4 -24-7.66610 14.3380   5
  -1  -4  24 15.4065 12.8249  13
  -1   4  24-9.42894 10.8847  12
  -1  -4  24-2.64093 10.9921  12
   1   4 -24 10.8066 13.7915   7
   1  -4 -24 4.06802 15.5750   7
   1  -4 -23 15.7276 10.8913   1
   1   4 -23 50.7388 18.2975   5
  -1  -4  23 57.9937 14.3475  12
  -1   4  23 42.4694 12.5484  12
  -1  -4  23 41.0897 15.6942  13
   1   4 -23 70.7224 19.3317   7
   1  -4 -23 60.9265 19.6921   7
   1  -4 -22-2.12613 10.1465   1
   1   4 -22 17.0870 15.2966   5
  -1   4  22 12.6798 9.78615  12
  -1  -4  22 16.8249 10.5912  12
  -1  -4  22 11.1582 12.2844  13
   1  -4 -22 7.10856 15.3697   7
   1   4 -22 18.8463 13.5872   7
   1  -4 -21-2.01002 8.83943   1
   1   4 -21 3.20098 13.5794   5
  -1   4  21 2.11331 9.76175   6
  -1  -4  21 9.14049 10.5548  12
  -1  -4  21 10.5852 11.6355  13
  -1   4  21 7.98736 8.62892  12
   1   4 -21 2.92128 12.1617   7
   1  -4 -21-6.72147 13.9904   7
   1  -4 -20 9.51019 10.1890   1
   1   4 -20 26.9761 14.9296   5
  -1   4  20 48.3342 12.3825   6
  -1   4  20 59.7225 13.2176  13
  -1   4  20 30.1055 10.7661  12
  -1  -4  20 41.1851 12.0477  12
  -1  -4  20 47.5954 13.5278  13
   1  -4 -20 34.2746 15.0777   7
   1   4 -20 27.0758 13.1709   7
  -1   4  19 15.9327 8.59549  12
  -1   4  19 9.00326 9.22965  13
  -1  -4  19 18.9160 10.6091  13
  -1  -4  19 12.2995 9.35918  12
   1  -4 -19 19.7230 9.52694   1
  -1   4  19 7.61533 9.74597   6
   1   4 -19-2.79713 11.8975   5
   1  -4 -19 13.0607 7.51596   2
   1   4 -19 17.5141 10.6497   7
   1  -4 -19-2.92789 12.4506   7
  -1  -4  18 77.9046 15.4610  13
  -1   4  18 76.1934 14.6426  13
  -1   4  18 88.0621 13.8361  12
  -1  -4  18 94.7696 15.0407  12
   1  -4 -18 67.4844 13.4472   1
   1   4 -18 111.829 18.9666   5
  -1   4  18 93.9382 15.2792   6
   1  -4 -18 69.3099 11.4444   2
   1   4 -18 96.8724 16.8912   7
   1  -4 -18 110.662 19.0956   7
  -1   4  17 556.880 49.9171  12
  -1  -4  17 601.529 52.8407  13
  -1   4  17 510.646 51.1159  13
  -1  -4  17 570.904 51.4138  12
   1  -4 -17 512.166 54.3524   5
   1   4 -17 541.647 53.4169   5
  -1   4  17 577.151 50.8642   6
   1  -4 -17 546.795 49.8760   1
   1   4 -17 533.617 52.0682   7
   1  -4 -17 527.981 53.5592   7
   1  -4 -17 511.487 47.7591   2
   1  -4 -16-12.6990 5.53712   2
  -1   4  16 5.55839 7.86277  13
  -1   4  16-7.26117 6.91688  12
  -1  -4  16-5.83704 8.55657  13
  -1  -4  16-1.69855 6.65427  12
   1   4 -16 11.1252 9.95123   5
   1  -4 -16 12.6083 12.5231   5
  -1   4  16-3.20205 7.16262   6
   1  -4 -16 4.44752 6.85034   1
   1   4 -16-3.91847 5.08402  11
   1  -4 -16 0.69787 3.74433   8
   1  -4 -16 2.30321 9.01999   7
   1   4 -16-1.92025 8.73093   7
   1  -4 -15 26.4129 5.32410   4
   1  -4 -15 28.6080 6.72428   2
   1  -4 -15 20.7267 7.26009   1
  -1   4  15 22.9693 7.76655  12
  -1  -4  15 31.7151 8.64502  12
  -1   4  15 43.2443 10.2976  13
  -1  -4  15 30.8176 9.58910  13
  -1   4  15 33.0982 8.76099   6
   1  -4 -15 9.35283 10.1352   5
   1   4 -15 28.5639 10.2086   5
   1   4 -15 23.2399 5.72325  11
   1  -4 -15 29.7822 5.56098   8
   1   4 -15 22.8554 8.50464   7
   1  -4 -15 17.0466 10.7843   7
   1  -4 -14 367.234 29.6235   4
   1  -4 -14 318.035 30.5105   2
   1  -4 -14 363.917 32.4763   1
  -1   4  14 344.363 32.1362  12
  -1   4  14 312.273 33.0256  13
  -1  -4  14 348.410 34.1683  13
  -1  -4  14 350.853 33.4337  12
   1   4 -14 353.795 30.1237  11
   1   4 -14 280.814 33.7821   5
  -1   4  14 333.076 32.6604   6
   1  -4 -14 330.267 35.6477   5
  -1  -4  14 332.631 28.0556  10
   1  -4 -14 327.498 29.4509   8
  -1   4  14 318.989 28.1613   9
   1   4 -14 361.046 33.9126   7
   1  -4 -14 345.413 35.0955   7
   1  -4 -13 1.25359 3.50757   4
   1  -4 -13-1.70968 3.94722   2
   1  -4 -13-2.36355 5.19476   1
  -1  -4  13-3.09586 7.47511  13
  -1   4  13 3.46544 5.16453  12
  -1  -4  13 9.51374 6.83876  12
   1  -4 -13-1.97729 8.84021   5
  -1   4  13-3.96548 6.47379   6
   1   4 -13 1.68359 7.77397   5
   1   4 -13-4.45830 4.24570  11
  -1  -4  13 0.97006 2.16048  10
  -1   4  13 0.39274 2.46243   9
   1  -4 -13-2.16340 2.16281   9
   1   4 -13 1.35346 2.26077  10
   1  -4 -13 3.53304 7.63010   7
   1  -4 -13 3.12186 3.18280   8
   1   4 -13 5.77250 6.12095   7
   1  -4 -12 79.9499 9.67472   2
   1  -4 -12 95.3969 9.61799   4
   1  -4 -12 61.6404 10.2741   1
  -1   4  12 81.2384 12.1120  13
  -1  -4  12 85.1441 12.4385  13
  -1   4  12 76.3175 10.9282  12
  -1  -4  12 64.8893 11.2923  12
  -1   4  12 75.4053 11.7509   6
  -1  -4  12 72.9531 7.47645   4
   1   4 -12 80.1496 13.0525   5
   1  -4 -12 59.5954 12.6032   5
   1  -4 -12 73.5073 8.56880  10
   1   4 -12 80.6763 7.88844  10
  -1  -4  12 80.0490 7.81716  10
   1   4 -12 80.7876 9.68257  11
   1  -4 -12 78.5783 7.97329   9
   1   4 -12 78.4347 7.12977   9
  -1  -4  12 86.4727 7.23016   9
  -1   4  12 77.8585 8.21482   9
   1  -4 -12 83.7871 9.05042   8
   1  -4 -12 85.3270 13.4436   7
   1   4 -12 85.0012 12.5174   7
   1  -4 -11 971.344 77.8280   2
   1  -4 -11 971.989 77.2870   4
   1  -4 -11 948.593 78.8962   1
  -1  -4  11 962.904 79.6821  12
  -1   4  11 902.897 78.6058  12
  -1   4  11 918.925 79.9097  13
  -1  -4  11 937.187 80.3319  13
   1   4 -11 966.800 77.6499  11
  -1  -4  11 967.660 75.7886   4
   1   4 -11 929.528 80.4943   5
   1  -4 -11 789.885 80.7203   5
  -1   4  11 915.340 79.4655   6
   1   4 -11 909.332 75.8781  10
  -1  -4  11 925.596 75.9059  10
   1  -4 -11 909.594 76.7158  10
  -1  -4  11 952.515 75.5011   9
  -1   4  11 966.321 76.3895   9
   1  -4 -11 950.884 76.2281   9
   1   4 -11 917.537 75.4499   9
   1  -4 -11 987.669 77.1308   8
   1   4 -11 995.699 79.8375   7
   1  -4 -11 909.896 80.6838   7
  -1   4  10 58.7655 9.29545   3
   1  -4 -10 54.8950 8.33541   4
   1  -4 -10 76.9037 9.78792   1
   1  -4 -10 73.8213 8.76397   2
  -1   4  10 71.7639 9.83007  12
  -1  -4  10 70.8349 11.1973  13
  -1   4  10 83.3062 11.6260  13
  -1  -4  10 91.3126 10.9753  12
  -1  -4  10 77.1593 7.40396   4
   1  -4 -10 70.8600 12.7908   5
   1   4 -10 94.3940 11.5463   7
  -1   4  10 55.9020 10.1820   6
   1   4 -10 60.4380 10.8034   5
   1  -4 -10 76.4304 8.17269  10
  -1  -4  10 78.1029 7.48637  10
   1   4 -10 80.1250 9.08258  11
   1   4 -10 76.4869 7.41238  10
   1  -4 -10 77.5076 7.75953   9
   1   4 -10 70.4439 7.01464   9
  -1   4  10 73.7264 7.91787   9
  -1  -4  10 81.4911 7.19495   9
   1  -4 -10 69.9750 8.36338   8
   1  -4 -10 65.0725 11.6762   7
  -1   4   9 2.96580 4.21654   3
   1  -4  -9 8.14639 3.67527   4
  -1  -4   9 2.77455 7.43883   1
   1  -4  -9 6.60757 3.63038   2
   1  -4  -9 7.87326 4.38135   1
  -1  -4   9 3.22304 5.76769  13
  -1   4   9 11.5755 6.32775  13
  -1   4   9 3.93085 4.32766  12
  -1  -4   9 4.69929 5.22215  12
   1  -4  -9 17.0830 7.74762   5
   1   4  -9 11.3511 6.75320   5
  -1   4   9 2.98138 5.57902   6
   1   4  -9 1.27513 3.91972  11
  -1  -4   9 6.61843 2.62326  10
   1   4  -9 5.41960 2.37348  10
  -1  -4   9 5.35383 2.21901   9
   1   4  -9 6.55742 2.31736   9
  -1   4   9 3.75246 2.77956   9
   1  -4  -9 5.55513 2.82138   9
   1  -4  -9-2.25810 6.97213   7
   1  -4  -9 7.48908 3.46258   8
  -1   4   8 1.31147 3.51118   3
   1  -4  -8 0.56672 3.95352   4
  -1  -4   8 2.51275 7.81085   1
   1  -4  -8 1.61867 3.41282   2
  -1   4   8 3.95942 2.98446   2
   1  -4  -8-1.39138 4.17405   1
  -1   4   8 4.20630 4.32140  12
  -1   4   8-1.89937 5.31534  13
  -1  -4   8 8.43536 5.28971  12
   1  -4  -8 5.80062 6.42338   5
  -1   4   8 0.91587 5.74317   6
   1   4  -8 5.28582 5.33388   5
  -1  -4   8 0.31669 2.35698  10
   1   4  -8 1.82138 4.05760  11
   1  -4  -8 0.39448 2.32391   9
   1   4  -8-0.29403 2.32890  10
  -1   4   8 0.41521 2.91709   9
   1   4  -8 2.06585 2.38666   9
  -1  -4   8-0.56587 2.29987   9
   1  -4  -8 2.35009 2.94848   8
   1  -4  -8 6.90210 6.13030   7
   1  -4  -7 810.346 59.8355   2
  -1   4   7 738.240 60.0341   3
   1  -4  -7 702.451 59.5793   3
  -1  -4   7 680.774 62.2141   1
   1  -4  -7 708.890 60.0984   1
  -1  -4   7 683.103 60.7476  12
  -1   4   7 663.111 59.9754  12
  -1   4   7 728.306 61.1872  13
  -1   4   7 730.905 58.0745  11
   1  -4  -7 674.601 61.6038   5
   1   4  -7 722.647 60.7578   5
  -1   4   7 712.629 61.1072   6
   1   4  -7 733.464 60.0589  11
   1  -4  -7 749.417 58.1256  11
  -1  -4   7 721.759 58.8628  10
   1   4  -7 726.459 58.7292  10
  -1  -4   7 670.994 59.5896  11
   1  -4  -7 743.767 59.2132   9
  -1  -4   7 702.777 58.7400   9
   1   4  -7 718.688 58.8308   9
  -1   4   7 777.968 59.4205   9
   1  -4  -7 678.229 61.0390   7
   1  -4  -7 749.409 59.4858   8
  -1   4   7 709.194 60.2396   7
   1  -4  -6 3307.96 272.936   3
  -1   4   6 3407.36 273.341   3
   1  -4  -6 3311.32 273.412   1
  -1  -4   6 3225.02 275.315   1
   1  -4  -6 3629.27 273.159   2
   1  -4  -6 3391.32 273.420  12
  -1   4   6 3461.07 274.474  13
  -1   4   6 3368.34 273.506  12
  -1  -4   6 3153.27 273.879  12
  -1   4   6 3445.09 271.946  11
   1   4  -6 3330.00 273.911   5
   1  -4  -6 3171.38 274.210   6
  -1   4   6 3296.82 274.127   5
   1  -4  -6 3488.94 275.003   5
  -1   4   6 3529.30 274.646   6
   1   4  -6 3611.88 273.666  11
  -1  -4   6 3599.46 272.645  10
   1  -4  -6 3523.63 272.013  11
  -1  -4   6 3306.65 273.240  11
   1  -4  -6 3375.86 272.833   9
   1   4  -6 3441.95 272.638   9
  -1   4   6 3450.61 272.971   9
  -1  -4   6 3407.51 272.504   9
   1  -4  -6 3386.85 273.049   8
  -1   4   6 3476.24 273.620   7
   1  -4  -6 3400.58 274.317   7
  -1   4   5 922.539 72.7855   3
   1  -4  -5 848.353 72.3898   3
   1   4  -5 904.615 74.3489   1
   1  -4  -5 869.133 72.8996   1
   1  -4  -5 925.038 72.7065   2
  -1   4   5 887.810 73.0525   1
  -1  -4   5 862.308 74.6048   1
   1  -4  -5 894.568 72.9087  12
  -1   4   5 892.944 73.0531  12
  -1   4   5 946.325 74.0729  13
   1  -4  -5 860.973 73.5232  13
  -1   4   5 896.066 71.8539  11
   1  -4  -5 950.147 71.9478  11
  -1  -4   5 907.324 71.9307   6
   1  -4  -5 889.918 74.1368   5
  -1   4   5 947.115 74.1685   6
  -1   4   5 894.253 73.6001   5
   1  -4  -5 839.773 73.7141   6
   1   4  -5 928.045 73.2301  11
  -1  -4   5 905.603 72.3640  10
  -1  -4   5 857.321 72.8927  11
   1  -4  -5 883.792 72.5737   9
  -1   4   5 867.624 72.6473   9
   1   4  -5 902.506 72.4302   9
  -1  -4   5 891.873 72.3090   9
  -1   4   5 865.532 72.9446   7
   1  -4  -5 847.678 73.5003   7
  -1   4   4 8677.83 674.440   3
   1  -4  -4 8606.43 674.270   3
  -1   4   4 8455.40 674.725   1
  -1  -4   4 8009.88 675.858   1
   1  -4  -4 8777.16 674.751   1
   1   4  -4 7681.79 675.501   1
   1  -4  -4 8449.08 675.243  13
  -1   4   4 9033.64 675.768  13
  -1   4   4 8674.89 674.748  12
   1  -4  -4 8387.77 674.586  12
  -1   4   4 8631.01 674.036  11
   1  -4  -4 8592.43 674.077  11
   1  -4  -4 8301.53 675.490   6
  -1   4   4 8391.42 675.066   5
   1  -4  -4 8299.63 675.390   5
  -1   4   4 8858.26 675.777   6
  -1  -4   4 8477.05 673.919   6
  -1  -4   4 8057.44 674.753  11
  -1  -4   4 8664.44 674.429  10
   1  -4  -4 8658.66 674.798  10
   1   4  -4 8346.50 675.061  11
  -1   4   4 8476.77 674.694   9
   1   4  -4 8557.27 674.509   9
   1  -4  -4 8346.50 674.572   9
  -1  -4   4 8439.00 674.342   9
   1  -4  -4 8039.79 674.990   7
  -1   4   4 8773.29 674.701   7
   1  -4  -3 2300.28 178.403   3
  -1   4   3 2194.00 178.418   3
  -1  -4   3 1883.35 179.601   1
  -1   4   3 2229.91 178.743   1
   1  -4  -3 2354.17 178.879   1
   1  -4  -3 2287.23 178.738  12
   1  -4  -3 2359.04 179.442  13
  -1   4   3 2183.58 178.708  12
  -1   4   3 2437.72 179.904  13
   1  -4  -3 2325.41 178.515  11
  -1   4   3 2314.48 178.509  11
  -1   4   3 2196.21 178.893   5
  -1   4   3 2270.26 179.908   6
   1   4  -3 2141.23 178.194   6
  -1  -4   3 2320.30 178.363   6
   1  -4  -3 2231.46 179.204   5
   1  -4  -3 2231.51 179.012  10
   1   4  -3 2124.20 179.100  11
  -1  -4   3 2187.51 179.008  11
  -1   4   3 2252.81 178.998   9
   1   4  -3 2279.88 178.862   9
  -1  -4   3 2211.90 178.692   9
   1  -4  -3 2205.07 178.862   9
   1  -4  -3 2163.41 178.935   7
   1   4  -3 1879.20 181.322   7
  -1   4   3 2304.45 178.640   7
  -1   4   2 7779.56 649.282   3
   1  -4  -2 8334.56 649.375   3
   1  -4  -2 8224.15 649.735   1
  -1   4   2 8181.04 649.607   1
   1  -4  -2 8711.00 649.888  12
   1  -4  -2 9669.70 650.960  13
  -1   4   2 8248.71 649.685  11
   1  -4  -2 8055.93 649.637  11
   1  -4  -2 7897.16 649.646   5
   1   4  -2 8203.50 649.537   6
  -1  -4   2 7947.97 649.541   6
  -1   4   2 9126.47 649.608   5
  -1   4   2 7785.22 649.876  10
   1  -4  -2 7945.80 649.960  10
  -1   4   2 8121.90 649.991   9
   1  -4  -2 8096.64 649.949   9
  -1  -4   2 8123.84 649.815   9
   1   4  -2 8290.07 649.958   9
  -1  -4   2 7281.70 652.210   7
   1  -4  -2 8075.06 649.614   7
   1   4  -2 6968.61 652.213   7
  -1   4   2 8253.43 649.378   7
  -1   4   1 583.231 45.0558   1
   1  -4  -1 595.097 45.1644   1
  -1  -4   1 466.559 48.2090   7
   1  -4  -1 551.258 44.9899  11
  -1   4   1 554.768 45.0446  11
  -1   4   1 523.470 45.0292  10
   1   4  -1 503.652 45.0972  11
  -1   4   1 656.865 44.9586   3
   1   4  -1 540.792 45.1311   9
  -1   4   1 491.727 45.0545   9
  -1  -4   1 568.370 45.1464   9
   1  -4  -1 507.470 45.2804   6
   1   4  -1 566.846 45.0910   6
   1  -4  -1 546.223 44.2997   5
  -1  -4   1 558.497 45.0859   6
  -1   4   0 56.8757 7.08699   6
   1   4   0 59.9916 7.37663   6
  -1  -4   0 55.1716 7.32940   6
   1  -4   0 55.3462 7.17645   6
  -1   4   0 64.8468 7.28667  11
   1  -4   0 56.6874 7.05583  11
   1   4   0 60.4660 6.92059  11
   1   4   0 51.8074 19.3490   7
  -1  -4   0 54.7781 17.0607   7
  -1   4   0 88.3138 7.52400   1
   1  -4   0 59.4622 7.19368   1
   1   4   1 165.079 17.2886   7
  -1  -4  -1 64.8684 17.2885   7
   1  -4   1 138.715 12.9100  12
   1   4   1 138.582 12.8713  11
   1   4   1 130.342 13.5615   5
  -1  -4  -1 133.497 13.7284   6
   1   4   1 130.250 13.6173   6
  -1   4  -1 153.602 13.2906   6
   1  -4   1 140.332 13.1614   6
   1  -4   1 137.286 13.1620  10
  -1   4  -1 150.144 13.1915  10
   1   4   1 146.377 12.9233  11
   1   4   1 134.384 13.1366   9
   1  -4   1 143.841 13.0431   9
  -1   4  -1 154.372 13.1741   9
   1  -4   1 134.982 13.4021   1
  -1   4  -1 150.251 13.4067   1
   1   4   2 2203.66 187.556   7
  -1  -4  -2 2587.06 189.076   7
  -1   4  -2 2407.32 186.164  12
   1   4   2 2332.96 185.768  11
   1  -4   2 2414.44 186.124  12
   1  -4   2 2283.45 186.173  11
   1  -4   2 2337.89 186.213   6
  -1  -4  -2 2218.95 186.764   6
   1   4   2 2287.69 186.937   6
   1   4   2 2269.77 186.696   5
  -1   4  -2 2321.54 185.283   5
   1  -4   2 2224.53 185.102   5
  -1   4  -2 2295.68 186.038  10
   1  -4   2 2422.82 186.229  10
   1   4   2 2351.99 185.735  11
  -1   4  -2 2397.02 186.122   9
   1   4   2 2425.47 186.236   9
   1  -4   2 2309.34 185.978   9
  -1  -4  -2 2339.59 186.056   9
  -1   4  -2 2281.20 186.579   1
   1  -4   2 2310.02 186.872   1
  -1  -4  -3 27.8170 3.36543   3
   1  -4   3 24.9175 6.20809   1
  -1   4  -3 30.6648 6.76442   1
   1   4   3 31.5161 5.61009   1
   1   4   3 27.2424 5.48324  12
   1  -4   3 28.2375 5.28332  12
  -1   4  -3 29.0041 5.23491  12
   1   4   3 31.3319 4.44748  11
   1   4   3 24.4678 6.93053   5
  -1   4  -3 30.2087 4.88445   5
  -1  -4  -3 24.4097 6.63312   6
   1  -4   3 34.7265 4.60613   5
  -1   4  -3 35.0632 4.76965   7
  -1  -4  -3 32.4843 7.11709   5
   1  -4   3 30.4350 5.20514  11
   1   4   3 32.4930 4.30864  11
  -1   4  -3 33.9612 5.39043  11
   1  -4   3 34.0318 5.31851  10
  -1   4  -3 22.8892 4.75935  10
   1   4   3 27.8879 5.13696   9
  -1  -4  -3 35.7704 5.06898   9
  -1   4  -3 28.8550 4.77523   9
   1  -4   3 32.9105 4.81762   9
  -1  -4  -3 31.0684 8.51730   7
   1   4   3 41.3590 8.01314   7
  -1  -4  -4 2287.90 180.493   3
   1   4   4 2298.43 181.955   1
  -1   4  -4 2257.01 182.752   1
  -1  -4  -4 2378.94 180.194   2
   1  -4   4 2130.08 182.975   1
   1   4   4 2173.05 181.795  12
   1  -4   4 2320.51 181.901  12
  -1   4  -4 2291.72 181.685  11
   1   4   4 2310.60 180.635  11
  -1   4  -4 2224.73 181.696  12
   1  -4   4 2210.08 181.548  11
  -1   4  -4 2179.73 181.499   5
   1   4   4 2175.52 182.736   5
  -1  -4  -4 2338.57 183.347   5
   1  -4   4 2110.68 181.128   5
   1   4   4 2258.41 180.607  11
   1  -4   4 2331.95 181.506  10
  -1   4  -4 2146.04 181.185  10
   1  -4   4 2209.27 181.054   9
  -1  -4  -4 2218.07 181.227   9
   1   4   4 2357.95 181.481   9
  -1   4  -4 2272.74 181.187   9
   1   4   4 2262.30 183.152   7
  -1  -4  -4 2197.12 183.657   7
  -1   4  -4 2384.79 181.621   7
  -1  -4  -5 343.490 29.4849   2
  -1  -4  -5 353.582 30.0806   3
   1  -4   5 383.031 33.3975   1
   1  -4   5 383.205 31.7194  12
   1   4   5 332.573 31.3696  12
   1  -4   5 365.490 31.0826  11
   1   4   5 382.218 29.7787  11
  -1   4  -5 365.986 31.3466  12
  -1   4  -5 369.929 31.1581  11
  -1   4  -5 360.377 31.5927   5
  -1  -4  -5 339.699 32.9799   5
   1  -4   5 343.749 31.0056   5
   1   4   5 354.415 32.4877   6
   1   4   5 346.517 32.7278   5
  -1   4  -5 329.576 30.4917  10
  -1  -4  -5 367.064 30.9782  10
   1  -4   5 371.632 30.8634  10
   1   4   5 363.308 29.7778  11
   1   4   5 369.767 30.8530   9
  -1  -4  -5 375.802 30.6338   9
  -1   4  -5 387.995 30.5859   9
   1  -4   5 362.766 30.3999   9
  -1   4  -5 379.683 31.3825   7
   1   4   5 377.468 33.1188   7
  -1  -4  -5 338.781 33.4742   7
  -1  -4  -6 129.692 12.3498   3
  -1  -4  -6 129.784 11.6196   2
  -1  -4  -6 145.044 14.0025   1
   1  -4   6 138.792 16.2388   1
   1   4   6 129.652 13.7045  12
   1  -4   6 136.230 14.1104  13
   1  -4   6 129.179 14.0136  12
   1   4   6 139.075 11.5439  11
  -1   4  -6 145.665 13.3449  11
   1   4   6 113.965 14.6352   6
  -1  -4  -6 169.673 16.6428   5
  -1   4  -6 115.279 14.2025   5
   1  -4   6 119.795 13.3874   5
  -1   4  -6 122.722 12.4885  10
  -1  -4  -6 137.291 13.0992  10
   1  -4   6 138.248 12.9293  10
   1  -4   6 119.243 13.0430  11
   1   4   6 132.876 11.5580  11
  -1   4  -6 141.106 12.4669   9
   1  -4   6 122.199 12.2133   9
  -1  -4  -6 129.540 12.5356   9
   1   4   6 131.246 12.7898   9
  -1   4  -6 141.812 14.0912   7
  -1  -4  -6 151.494 16.8222   7
  -1  -4  -7 869.253 70.8662   2
  -1  -4  -7 856.604 71.5922   3
  -1  -4  -7 839.951 72.8152   1
   1   4   7 844.186 70.6283   2
   1  -4   7 896.241 73.3663  13
   1   4   7 868.159 72.9647  12
   1  -4   7 921.298 73.2492  12
  -1   4  -7 863.289 72.1827  11
   1   4   7 937.996 70.4021  11
  -1  -4  -7 840.329 74.8110   5
   1  -4   7 779.115 72.5570   5
  -1   4  -7 897.787 73.7097   5
   1   4   7 853.270 73.9948   6
   1   4   7 896.505 70.4255  11
  -1   4  -7 905.174 71.7202  10
   1  -4   7 973.138 72.0024  10
  -1  -4  -7 909.555 71.5936   9
   1   4   7 890.208 71.7804   9
   1  -4   7 811.373 71.1161   9
  -1   4  -7 897.270 71.3237   9
  -1  -4  -7 826.015 70.7065   8
  -1   4  -7 911.381 73.3088   7
  -1  -4  -7 831.667 74.9254   7
  -1  -4  -8 1047.71 88.9736   3
  -1  -4  -8 1096.71 88.2237   2
  -1  -4  -8 1092.89 90.4556   1
   1   4   8 1009.02 87.8069   2
   1  -4   8 1120.91 90.8678  13
   1  -4   8 1157.09 90.7785  12
   1   4   8 985.183 90.1808  12
  -1   4  -8 1092.02 89.3628  11
   1   4   8 1135.21 87.2925  11
  -1  -4  -8 999.239 92.1336   5
  -1   4  -8 1051.89 91.1086   5
   1   4   8 1052.54 91.4924   6
  -1   4  -8 1101.52 88.8208  10
   1  -4   8 1118.80 88.9710  10
   1   4   8 1098.76 87.3383  11
  -1  -4  -8 1121.98 88.6491   9
   1   4   8 1129.17 88.9609   9
  -1   4  -8 1065.10 88.2870   9
   1  -4   8 1041.47 88.2431   9
  -1   4  -8 1125.55 90.9078   7
  -1  -4  -8 1113.29 92.7495   7
  -1  -4  -8 1158.37 87.9365   8
  -1  -4  -9 52.7281 6.53034   2
   1  -4   9 56.3552 5.23189   4
   1   4   9 52.6312 6.09381   2
  -1  -4  -9 45.7445 8.57456   1
   1   4   9 41.8339 9.12425  13
   1  -4   9 56.8218 9.38844  13
   1   4   9 55.4424 9.15497  12
   1  -4   9 78.6518 9.84278  12
  -1   4  -9 63.4164 10.3478   5
   1   4   9 62.9818 10.0696   6
  -1  -4  -9 57.6221 11.8871   5
  -1   4  -9 64.2727 7.12051  10
   1  -4   9 61.8549 7.36179  10
  -1   4  -9 52.7536 7.52804  11
  -1   4  -9 56.5467 6.43317   9
   1  -4   9 63.8748 6.59503   9
  -1  -4  -9 57.9128 6.80598   9
   1   4   9 48.6966 6.83629   9
  -1   4  -9 70.9476 10.0617   7
  -1  -4  -9 62.7965 11.9335   7
  -1  -4  -9 56.3310 6.01897   8
  -1  -4 -10 432.973 37.8372   2
  -1  -4 -10 462.867 40.4660   1
   1   4  10 419.866 37.4060   2
   1  -4  10 487.280 40.9927  12
   1   4  10 455.183 40.4027  12
   1   4  10 443.665 41.1243  13
   1  -4  10 482.841 41.2455  13
  -1   4 -10 455.001 38.8532  11
   1   4  10 467.715 41.7814   6
  -1   4 -10 418.829 41.4046   5
  -1  -4 -10 493.493 43.5722   5
  -1   4 -10 455.005 38.1909  10
   1  -4  10 441.177 38.2450  10
   1  -4  10 435.528 37.4209   9
  -1  -4 -10 461.607 37.8382   9
   1   4  10 497.040 38.3675   9
  -1  -4 -10 454.229 37.1538   8
  -1  -4 -10 453.218 43.2456   7
  -1   4 -10 451.587 41.2253   7
  -1  -4 -11 100.798 10.0119   2
  -1  -4 -11 105.006 12.9314   1
   1   4  11 80.1369 9.18181   2
   1  -4  11 93.8598 13.0463  13
   1  -4  11 78.2141 12.2104  12
   1   4  11 74.8444 11.4837  12
   1   4  11 91.9804 13.4678  13
  -1   4 -11 104.752 10.9528  11
  -1   4 -11 90.5773 14.2070   5
  -1  -4 -11 89.7066 15.0501   5
   1   4  11 90.4293 13.2514   6
   1  -4  11 84.9307 9.92916  10
   1   4  11 95.7672 9.99988   9
  -1  -4 -11 99.5846 9.63977   9
   1  -4  11 91.7651 9.22245   9
  -1  -4 -11 101.445 8.97876   8
  -1   4 -11 111.267 14.0117   7
  -1  -4 -11 95.0015 14.9557   7
  -1  -4 -12 3.05749 2.96329   2
  -1  -4 -12 2.50800 6.14657   1
   1   4  12 1.47939 6.83556  13
   1   4  12 7.26438 5.68260  12
   1  -4  12 1.41196 6.62544  13
   1  -4  12 2.62969 6.35431  12
  -1   4 -12 2.14836 3.88530  11
  -1  -4 -12 13.9592 9.06643   5
   1   4  12 6.07147 7.12172   6
  -1   4 -12-5.00520 7.33800   5
   1  -4  12 1.79710 3.50068  10
   1  -4  12 0.73275 2.29093   9
   1   4  12 3.28807 3.35656   9
  -1  -4 -12 6.37718 2.54883   8
  -1  -4 -12 7.85413 9.75238   7
  -1   4 -12 7.77032 7.40087   7
  -1  -4 -13 159.951 18.5115   1
   1   4  13 182.718 18.5054  12
   1  -4  13 165.788 19.2654  13
   1   4  13 156.123 19.1307  13
   1  -4  13 150.865 18.5262  12
  -1   4 -13 169.846 15.9464  11
  -1   4 -13 154.203 20.4419   5
  -1  -4 -13 179.545 22.8215   5
   1   4  13 141.770 19.0646   6
   1  -4  13 150.893 15.1993  10
   1   4  13 153.427 14.8599   9
  -1  -4 -13 148.673 13.8476   8
  -1   4 -13 153.650 19.7290   7
  -1  -4 -13 154.160 21.6225   7
  -1  -4 -14 48.1171 6.20592   4
  -1  -4 -14 34.9747 8.85125   1
   1   4  14 32.2410 8.71140  12
   1  -4  14 16.6696 8.23536  13
   1   4  14 42.7414 10.3828  13
  -1   4 -14 52.2190 7.26531  11
   1   4  14 50.4678 11.3790   6
  -1   4 -14 36.0462 11.4309   5
   1  -4  14 48.1487 6.73058  10
   1   4  14 34.3529 5.81403   9
  -1   4 -14 47.7001 11.1548   7
  -1  -4 -14 46.4758 13.3989   7
   1   4  15-3.65731 7.00179  13
   1   4  15-1.50049 6.12463  12
   1  -4  15-5.38637 8.16042  13
  -1   4 -15 3.87038 4.42383  11
  -1   4 -15-4.35873 10.0636   5
   1   4  15 3.72228 8.03927   6
   1  -4  15-2.65264 4.39854  10
  -1  -4 -15-1.56012 7.20438   1
  -1   4 -15 12.3864 9.38265   7
  -1  -4 -15-12.5576 12.6378   7
  -1   4 -16 158.192 16.5281  11
   1   4  16 167.769 21.2489  13
   1  -4  16 148.290 20.7236  13
   1   4  16 158.571 19.3925  12
  -1  -4 -16 166.368 20.0433   1
  -1  -4 -16 167.667 24.2194   7
  -1   4 -16 167.241 22.6859   7
  -1   4 -16 193.055 23.9535   5
   1   4  16 164.236 21.3800   6
   1  -4  17 129.727 19.9554  13
   1   4  17 149.522 20.4915  13
   1   4  17 151.821 18.8535  12
  -1  -4 -17 152.106 19.5490   1
  -1  -4 -17 176.910 25.1290   7
  -1   4 -17 170.037 22.8625   7
  -1   4 -17 119.063 21.1225   5
   1   4  17 153.798 21.5319   6
   1   4  18 17.6457 10.4757  13
   1  -4  18 28.5275 12.1306  13
   1   4  18 10.8759 9.38866  12
  -1  -4 -18 29.9966 9.93906   1
  -1   4 -18 10.7146 13.0420   7
  -1  -4 -18 15.4987 13.9581   7
   1   4  18 49.0275 13.4705   6
  -1   4 -18 10.8988 13.4478   5
   1   4  19 343.833 37.1523  13
   1  -4  19 312.620 36.6168  13
   1   4  19 380.705 36.5166  12
  -1  -4 -19 355.072 36.2039   1
  -1  -4 -19 335.496 41.5285   7
  -1   4 -19 348.261 40.2432   7
  -1   4 -19 270.657 38.2932   5
   1   4  19 416.185 39.0761   6
   1   4  20 99.3781 18.1339  13
   1   4  20 79.3040 15.2422  12
   1  -4  20 133.605 20.2040  13
  -1  -4 -20 67.0512 15.4907   1
  -1  -4 -20 103.333 24.0321   7
  -1   4 -20 141.891 22.8976   7
  -1   4 -20 108.574 21.5745   5
   1   4  20 119.191 19.1189   6
   1   4  21 275.823 32.4949  13
   1   4  21 264.523 30.1636  12
   1  -4  21 259.166 31.2815  13
  -1  -4 -21 257.717 30.2888   1
  -1  -4 -21 267.794 36.6805   7
  -1   4 -21 305.698 36.0757   7
   1   4  21 239.411 31.0316   6
  -1   4 -21 228.214 33.4433   5
   1   4  22 49.9165 15.2304  13
   1  -4  22 91.2471 17.9565  13
   1   4  22 59.0515 14.0416  12
  -1  -4 -22 78.8980 15.8589   1
  -1   4 -22 67.8223 19.4540   7
  -1  -4 -22 76.8440 22.1479   7
  -1  -4 -22 38.8605 18.5435   5
  -1   4 -22 21.0495 16.3676   5
   1   4  22 59.7956 16.5200   6
   1   4  23 396.083 40.9190  13
   1  -4  23 329.349 39.9306  13
   1   4  23 339.664 37.9607  12
  -1  -4 -23 360.200 38.5825   1
  -1   4 -23 328.645 44.1533   7
  -1  -4 -23 327.867 44.6612   7
  -1  -4 -23 320.359 44.7076   5
   1   4  23 367.537 40.2476   6
   1   4  24-6.17708 11.0079  13
   1   4  24-5.04087 10.3068  12
   1  -4  24 12.2591 12.0148  13
  -1  -4 -24 10.2374 11.2686   1
  -1  -4 -24 58.9906 20.9629   7
  -1   4 -24 16.3209 17.6354   7
  -1  -4 -24 30.2526 18.3420   5
  -1   4 -24 19.6639 16.6931   5
   1  -4  25 111.658 20.6325  12
   1   4  25 126.960 19.9815  12
   1   4  25 101.105 20.5635  13
   1  -4  25 118.985 21.3064  13
  -1  -4 -25 59.2048 15.8795   1
  -1  -4 -25 85.5067 24.4049   7
  -1   4 -25 68.3954 22.4678   7
  -1  -4 -25 113.536 27.2291   5
  -1   4 -25 78.7451 24.0992   5
  -1   4 -26 21.8010 17.5213   5
  -1   5  26-2.61301 11.2932  12
  -1  -5  26 27.1994 16.1871  13
   1  -5 -26-7.80147 10.6208   1
   1  -5 -26 32.1457 17.9815   7
   1   5 -26 12.6499 16.5115   5
  -1  -5  25 50.5453 14.7330  12
  -1  -5  25-3.25721 13.0885  13
  -1   5  25 19.8818 10.8111  12
   1  -5 -25 9.93213 12.0595   1
   1   5 -25 7.58419 13.1953   7
   1  -5 -25 38.9195 19.0523   7
   1   5 -25 20.0506 17.9748   5
  -1  -5  24 45.7644 13.6885  12
  -1  -5  24 18.6906 14.0661  13
  -1   5  24 18.9251 10.5839  12
   1  -5 -24 30.6634 12.3356   1
   1   5 -24 10.6653 14.6429   7
   1  -5 -24 32.9933 18.5438   7
   1   5 -24 19.0063 16.2429   5
  -1   5  23-2.24294 9.33780  12
  -1  -5  23-2.57538 10.7212  12
  -1  -5  23-8.91750 12.6094  13
  -1   5  23 20.1983 12.4649  13
   1  -5 -23-6.74892 10.5508   1
   1  -5 -23-23.1666 18.1063   7
   1   5 -23 9.97837 13.0224   7
   1   5 -23 17.9638 15.7941   5
   1  -5 -23-7.92499 16.8080   5
  -1  -5  22-8.48986 13.0675  13
  -1  -5  22 4.91776 9.83294  12
  -1   5  22-5.47189 12.6334  13
  -1   5  22 6.37030 9.17191  12
   1  -5 -22 12.8077 10.0096   1
   1  -5 -22 3.66107 14.6403   7
   1   5 -22-12.4083 12.9115   7
  -1   5  22-6.91113 9.40241   6
   1  -5 -22-15.0394 17.6304   5
   1   5 -22 23.7035 16.3525   5
  -1   5  21 33.6601 12.7989  13
  -1  -5  21 39.6762 12.5009  12
  -1   5  21 50.2545 12.5794  12
  -1  -5  21 43.0392 13.8085  13
   1  -5 -21 46.5358 12.4403   1
   1   5 -21 14.4216 12.9700   7
   1  -5 -21 57.9346 17.3644   7
  -1   5  21 26.4445 11.8378   6
   1  -5 -21 35.5780 15.8762   5
   1   5 -21 9.51350 12.7114   5
  -1  -5  20 15.5134 10.2492  12
  -1  -5  20 2.54838 9.77351  13
  -1   5  20 2.43944 9.14281  13
  -1   5  20 5.68907 7.44555  12
   1  -5 -20 30.7631 10.1871   1
   1   5 -20 18.7217 12.7425   7
   1  -5 -20 3.21434 13.1312   7
   1   5 -20 2.96871 11.6356   5
  -1   5  20-2.09109 9.20958   6
   1  -5 -20-3.35617 14.5075   5
  -1  -5  19 75.5936 14.6308  12
  -1   5  19 50.6660 13.5819  13
  -1  -5  19 76.7457 15.3599  13
  -1   5  19 55.3885 12.2564  12
   1  -5 -19 74.3352 17.4884   7
   1   5 -19 89.0878 17.0328   7
   1  -5 -19 72.6575 13.7644   1
   1  -5 -19 72.4361 18.9582   5
  -1   5  19 59.7774 14.2680   6
   1   5 -19 74.7581 16.4029   5
   1  -5 -18 70.2094 13.6148   1
  -1   5  18 128.197 16.9394   6
   1   5 -18 82.5489 18.2164   5
   1  -5 -18 129.979 21.5714   5
  -1  -5  18 65.5591 14.9251  13
  -1  -5  18 91.2363 16.3533  12
  -1   5  18 99.1018 14.7624  12
  -1   5  18 80.2958 16.0146  13
   1  -5 -18 103.452 12.6948   2
   1  -5 -18 94.7321 19.3183   7
   1   5 -18 86.8485 16.5905   7
   1  -5 -17 4.82862 6.83077   1
  -1  -5  17-1.85980 8.03641  12
  -1  -5  17-6.36980 9.65261  13
  -1   5  17 6.30897 7.28667  12
  -1   5  17 2.04068 8.49687  13
  -1   5  17-3.56323 8.48301   6
   1  -5 -17 24.8669 12.7602   5
   1   5 -17 4.77194 10.8462   5
   1   5 -17 6.33819 5.23140  11
   1  -5 -17-10.2319 12.1772   7
   1   5 -17 8.30389 9.58866   7
   1  -5 -17 7.72340 5.55672   2
   1  -5 -16 237.488 21.9585   4
   1  -5 -16 255.765 23.4186   2
   1  -5 -16 245.754 25.3455   1
  -1   5  16 231.754 26.5028  13
  -1  -5  16 231.969 25.9203  12
  -1  -5  16 229.517 27.3356  13
  -1   5  16 249.250 25.2359  12
   1   5 -16 223.665 22.4887  11
   1   5 -16 208.794 27.6977   5
  -1   5  16 209.806 25.3971   6
   1  -5 -16 223.359 28.8620   5
   1  -5 -16 265.764 22.3388   8
   1   5 -16 208.154 26.2326   7
   1  -5 -16 199.692 27.7677   7
   1  -5 -15 56.2432 10.8973   1
  -1  -5  15 64.5614 12.7874  13
  -1   5  15 74.1583 11.1012  12
  -1  -5  15 83.1067 12.4960  12
  -1   5  15 62.7307 12.2214  13
  -1   5  15 81.4175 12.9561   6
   1  -5 -15 61.9724 14.6456   5
   1   5 -15 46.3123 12.9769   5
   1   5 -15 78.8465 9.59991  11
   1   5 -15 59.5574 11.9917   7
   1  -5 -15 63.5279 8.51157   8
   1  -5 -15 52.8042 13.5376   7
   1  -5 -15 64.7827 8.51532   4
   1  -5 -15 47.6453 8.32583   2
   1  -5 -14 123.139 14.8478   2
   1  -5 -14 165.654 15.0276   4
   1  -5 -14 142.214 16.9328   1
  -1  -5  14 126.366 17.9956  13
  -1   5  14 137.763 16.6240  12
  -1   5  14 140.494 18.2361  13
   1   5 -14 152.227 15.4465  11
  -1  -5  14 128.452 17.8154  12
   1   5 -14 154.025 19.8052   5
  -1   5  14 127.942 17.4296   6
   1  -5 -14 160.915 21.3515   5
  -1  -5  14 135.966 12.9609  10
  -1   5  14 144.370 13.5396   9
   1  -5 -14 144.844 14.4016   8
   1   5 -14 164.964 18.8330   7
   1  -5 -14 123.598 18.8688   7
   1  -5 -13 8.18085 4.29471   4
   1  -5 -13-0.85217 3.93720   2
   1  -5 -13 2.39842 5.36319   1
  -1   5  13 4.66577 6.83781  13
  -1   5  13 3.53960 5.09793  12
  -1  -5  13-3.16290 7.07175  13
  -1  -5  13 1.39690 6.24681  12
  -1   5  13 1.41825 6.65164   6
   1   5 -13-4.97498 8.45453   5
   1  -5 -13 2.02316 8.42177   5
  -1  -5  13 2.31478 2.97391  10
   1   5 -13-1.69878 4.85515  11
  -1   5  13 6.09403 3.29295   9
   1  -5 -13 1.86120 2.40585   9
   1   5 -13 0.25439 1.88510   9
   1   5 -13 11.5603 7.55389   7
   1  -5 -13 4.66593 3.65234   8
   1  -5 -13-7.30113 7.74300   7
   1  -5 -12-0.73826 3.95240   4
   1  -5 -12 1.58351 3.59921   2
   1  -5 -12-1.09991 4.83555   1
  -1   5  12 5.43259 5.46771  12
  -1   5  12 5.76242 7.05595  13
  -1  -5  12-1.45522 6.50659  13
  -1  -5  12 1.29224 5.96746  12
   1   5 -12 1.48983 7.09145   5
  -1  -5  12 1.26335 2.14295   4
  -1   5  12 5.30960 6.31840   6
   1   5 -12-3.94051 6.69616   7
   1  -5 -12 9.25934 9.31858   5
  -1  -5  12 1.17285 2.57402  10
   1   5 -12-2.47633 4.85934  11
   1   5 -12 1.15866 1.95134   9
   1   5 -12 4.78940 2.62773  10
  -1   5  12-1.54772 3.18034   9
   1  -5 -12 2.39017 2.61873   9
  -1  -5  12-0.59903 2.22874   9
   1  -5 -12 0.63402 3.19125   8
   1  -5 -12 13.2812 8.24326   7
   1  -5 -11 864.501 64.9167   4
   1  -5 -11 786.314 64.6217   2
   1  -5 -11 730.901 65.4933   1
  -1  -5  11 745.618 66.3841  12
  -1  -5  11 790.036 67.3065  13
  -1   5  11 794.629 65.8579  12
  -1   5  11 746.504 66.8510  13
   1   5 -11 785.549 64.9724  11
   1  -5 -11 725.925 68.3064   5
  -1  -5  11 743.802 62.7822   4
  -1   5  11 765.028 66.7357   6
   1   5 -11 726.952 66.9817   5
   1   5 -11 739.925 63.0114  10
  -1  -5  11 821.244 63.2354  10
   1  -5 -11 815.406 63.5696   9
   1   5 -11 749.319 62.7439   9
  -1   5  11 788.726 63.6936   9
  -1  -5  11 795.651 62.8432   9
   1  -5 -11 791.292 64.0697   8
   1   5 -11 789.458 66.5440   7
   1  -5 -11 674.575 67.1582   7
   1  -5 -10 143.570 13.3608   4
  -1   5  10 99.2005 12.9352   3
   1  -5 -10 133.348 12.8448   2
   1  -5 -10 112.647 13.4838   1
  -1  -5  10 118.849 16.5580   1
  -1   5  10 126.036 15.3184  13
  -1  -5  10 138.619 15.9819  13
  -1   5  10 119.539 13.6372  12
  -1  -5  10 124.067 14.4330  12
   1  -5 -10 132.040 16.5254   5
   1   5 -10 108.010 14.1489   7
   1   5 -10 123.390 14.9299   5
  -1   5  10 111.840 14.6620   6
   1   5 -10 120.502 13.2215  11
  -1  -5  10 111.636 11.3908  10
   1   5 -10 124.910 11.4224  10
   1  -5 -10 123.057 11.7748   9
  -1  -5  10 127.051 11.2861   9
  -1   5  10 107.178 11.8383   9
   1   5 -10 127.750 11.3093   9
   1  -5 -10 118.058 15.3197   7
   1  -5 -10 119.639 12.2098   8
  -1   5   9 450.569 39.1103   3
   1  -5  -9 483.314 38.7394   2
   1  -5  -9 552.733 39.6334   4
  -1  -5   9 436.962 42.2060   1
   1  -5  -9 405.208 39.1483   1
  -1   5   9 465.516 40.9757  13
  -1   5   9 436.035 39.4319  12
  -1  -5   9 459.643 40.3498  12
  -1   5   9 470.691 40.9297   6
   1   5  -9 449.510 40.3225   5
   1  -5  -9 422.768 41.5329   5
  -1  -5   9 464.489 37.7302  10
   1   5  -9 445.740 37.5373  10
   1   5  -9 454.850 39.2260  11
   1  -5  -9 453.122 37.9951   9
   1   5  -9 435.753 37.4980   9
  -1  -5   9 439.208 37.4620   9
  -1   5   9 457.744 38.2237   9
   1  -5  -9 446.218 38.2682   8
   1  -5  -9 445.732 41.0583   7
   1  -5  -8 156.456 14.5534   2
  -1   5   8 162.979 15.0670   3
  -1  -5   8 143.993 17.9417   1
   1  -5  -8 148.154 15.2568   1
  -1   5   8 146.696 15.2208  12
  -1   5   8 132.771 16.1962  13
  -1   5   8 156.291 12.6727  11
  -1   5   8 151.410 16.4387   6
   1  -5  -8 116.569 16.6466   5
   1   5  -8 165.250 16.3611   5
   1  -5  -8 145.653 12.6270  11
   1   5  -8 151.720 15.2776  11
  -1  -5   8 162.104 13.9098  10
   1   5  -8 149.533 13.5872  10
   1   5  -8 130.195 13.5186   9
  -1  -5   8 158.873 13.6493   9
   1  -5  -8 149.347 14.0258   9
  -1   5   8 144.194 14.1899   9
   1  -5  -8 122.576 16.3999   7
   1  -5  -8 152.523 14.2725   8
   1  -5  -7 1266.23 108.715   3
  -1   5   7 1356.58 109.312   3
   1  -5  -7 1454.82 109.165   2
   1  -5  -7 1284.51 109.501   1
  -1  -5   7 1320.54 111.889   1
  -1   5   7 1290.28 109.571  12
  -1   5   7 1429.08 111.144  13
  -1   5   7 1377.50 107.763  11
   1  -5  -7 1297.59 111.252   5
   1   5  -7 1389.99 110.025   5
  -1   5   7 1371.45 110.989   6
  -1  -5   7 1443.08 108.739  10
   1  -5  -7 1330.28 107.745  11
   1   5  -7 1415.96 109.884  11
   1  -5  -7 1336.20 108.835   9
   1   5  -7 1295.67 108.539   9
  -1   5   7 1325.90 109.009   9
  -1  -5   7 1299.55 108.413   9
   1  -5  -7 1253.71 110.691   7
   1  -5  -7 1411.24 109.105   8
  -1   5   7 1337.21 109.744   7
   1  -5  -6 588.790 51.4537   3
  -1   5   6 645.509 52.0226   3
  -1   5   6 629.239 52.4267   1
   1  -5  -6 634.431 52.3822   1
  -1  -5   6 582.249 54.0726   1
   1  -5  -6 662.238 51.9034   2
  -1   5   6 626.791 53.5979  13
  -1   5   6 650.366 52.4956  12
   1  -5  -6 589.308 52.0996  12
  -1   5   6 657.209 50.9773  11
  -1  -5   6 606.399 51.1212   6
  -1   5   6 648.349 53.7243   6
   1   5  -6 648.562 52.6349   5
   1  -5  -6 585.718 53.4669   5
  -1   5   6 587.042 52.8485   5
   1  -5  -6 642.161 50.9473  11
  -1  -5   6 646.036 51.6797  10
   1   5  -6 643.091 52.6497  11
  -1  -5   6 619.441 51.4939   9
   1   5  -6 634.181 51.7276   9
   1  -5  -6 617.418 51.8081   9
  -1   5   6 624.237 52.0156   9
   1  -5  -6 625.689 53.3247   7
  -1   5   6 621.745 52.4402   7
  -1   5   5 31.7729 4.83759   3
   1  -5  -5 35.0637 4.66008   3
  -1  -5   5 39.8239 8.21083   1
   1  -5  -5 38.4155 5.61818   1
  -1   5   5 36.5576 5.74663   1
   1  -5  -5 31.3049 5.90932  13
  -1   5   5 40.7986 7.33094  13
   1  -5  -5 36.4047 5.38918  12
  -1   5   5 29.3606 5.31929  12
  -1   5   5 40.2955 4.66704  11
  -1  -5   5 32.0271 4.37892   6
  -1   5   5 31.9182 7.25658   6
   1  -5  -5 31.9259 6.53017   5
  -1   5   5 34.6692 6.21355   5
   1  -5  -5 27.6562 4.28242  11
   1   5  -5 45.4164 6.42563  11
   1  -5  -5 29.6851 4.97379   9
  -1  -5   5 27.3862 4.71010   9
   1   5  -5 38.1773 5.23138   9
  -1  -5   5 32.3322 4.84564  10
  -1   5   5 31.0417 5.45168   9
   1  -5  -5 17.9889 5.74396   7
  -1   5   5 34.7955 6.03901   7
   1  -5  -4 284.551 24.0470   3
  -1   5   4 288.612 24.2236   3
   1  -5  -4 287.872 24.9248   1
  -1   5   4 272.564 24.7127   1
   1  -5  -4 298.080 24.7462  12
   1  -5  -4 269.356 25.3482  13
  -1   5   4 284.143 24.7586  12
  -1   5   4 330.436 26.5892  13
  -1   5   4 295.983 24.2600  11
   1  -5  -4 264.894 25.7403   6
  -1   5   4 271.362 25.8889   6
  -1  -5   4 288.926 24.1393   6
  -1   5   4 294.052 25.1798   5
   1  -5  -4 263.298 25.3860   5
  -1  -5   4 282.238 25.0006  11
   1  -5  -4 266.391 24.9136  10
   1   5  -4 297.116 25.3417  11
  -1  -5   4 288.581 24.5995  10
   1  -5  -4 300.837 24.2525  11
  -1   5   4 269.749 24.8453   9
   1  -5  -4 281.245 24.7785   9
   1   5  -4 287.277 24.7037   9
  -1  -5   4 302.899 24.6548   9
  -1   5   4 289.638 24.8366   7
   1  -5  -4 265.733 25.1255   7
   1  -5  -3 442.418 35.3942   3
  -1   5   3 432.873 35.4198   3
   1  -5  -3 463.475 36.2604   1
  -1   5   3 412.516 35.9090   1
  -1   5   3 421.613 35.9838  12
   1  -5  -3 435.007 36.0705  12
   1  -5  -3 493.798 37.3341  13
  -1   5   3 295.658 36.7817  13
   1  -5  -3 446.272 35.7991  11
  -1   5   3 450.534 35.8694  11
   1  -5  -3 397.650 36.2284   5
   1   5  -3 423.014 35.5497   6
  -1  -5   3 433.611 35.7111   6
  -1   5   3 424.994 35.9905   5
  -1  -5   3 428.448 36.3524  11
  -1  -5   3 434.484 36.1269  10
   1  -5  -3 438.989 36.4697  10
  -1   5   3 445.753 36.4473   9
   1   5  -3 434.435 36.2640   9
  -1  -5   3 444.699 36.0835   9
   1  -5  -3 438.868 36.2653   9
   1  -5  -3 426.976 36.3828   7
  -1   5   3 423.229 35.9221   7
   1   5  -3 408.677 39.5544   7
  -1   5   2 74.8007 7.36573   3
   1  -5  -2 69.9134 8.24519   1
  -1   5   2 72.9959 8.10307   1
   1  -5  -2 96.1593 9.06443  12
   1  -5  -2 102.433 10.8283  13
  -1   5   2 81.9366 8.32650  11
   1  -5  -2 92.1302 8.34669  11
  -1  -5   2 74.0548 8.13123   6
   1   5  -2 68.6430 7.90960   6
   1  -5  -2 76.0246 7.86376   5
  -1   5   2 81.3964 7.73428   5
   1  -5  -2 82.3510 8.67629   9
  -1  -5   2 48.8846 7.75208   9
  -1   5   2 68.1399 8.52958   9
   1  -5  -2 66.4325 8.35735  10
   1   5  -2 73.4557 8.41359   9
  -1  -5   2 83.6822 12.8922   7
   1   5  -2 29.2230 12.6962   7
  -1   5   2 75.3437 7.87149   7
   1  -5  -2 88.8431 8.76629   7
   1  -5  -1 937.401 72.3674   1
  -1   5   1 984.149 72.2862   1
  -1  -5   1 917.085 76.1292   7
  -1   5   1 858.465 71.4904   7
   1   5  -1 604.857 77.2510   7
   1  -5  -1 677.314 72.8057   7
   1  -5  -1 914.194 72.1222  11
  -1   5   1 911.176 72.1719  11
   1  -5  -1 861.947 71.1643   5
  -1   5   1 796.706 72.5076   6
   1   5  -1 934.768 72.3043   6
  -1  -5   1 896.465 72.2113   6
   1  -5  -1 889.892 72.5392   6
   1   5  -1 888.020 72.3676  11
  -1  -5   1 857.620 72.0927  11
  -1   5   1 805.975 72.0320  10
   1   5  -1 920.370 72.4172   9
  -1  -5   1 866.616 72.0803   9
  -1   5   1 1107.47 72.1119   3
  -1   5   0 2967.61 219.451  11
   1  -5   0 2756.30 219.180  11
   1   5   0 2900.03 219.663   6
   1  -5   0 2718.95 219.369   6
  -1  -5   0 2682.66 219.438   6
  -1   5   0 2707.41 219.464   6
  -1  -5   0 2744.74 219.045  11
   1   5   0 2734.61 219.226  11
  -1   5   0 2239.36 220.809   7
  -1  -5   0 2154.49 223.902   7
   1   5   0 1654.19 223.751   7
  -1   5   0 3168.74 219.570   1
   1  -5   0 2936.23 219.584   1
   1   5   1 403.764 33.8488   7
  -1   5  -1 326.927 29.5253   7
  -1   5  -1 345.124 29.4128  11
  -1   5  -1 346.739 29.3655   6
   1   5   1 334.801 29.4985   5
  -1  -5  -1 322.564 29.7833   6
   1   5   1 345.679 30.0633   6
   1  -5   1 333.633 29.2640   6
   1   5   1 345.036 29.0985  11
  -1   5  -1 344.172 29.2227  10
   1  -5   1 363.665 29.5372  10
   1  -5   1 315.759 29.0981   9
  -1   5  -1 357.613 29.3547   9
   1   5   1 317.246 29.3036   9
  -1   5  -1 361.794 29.5208   1
   1  -5   1 352.893 29.8046   1
  -1   5  -2 578.017 49.2560   1
   1   5   2 578.924 48.8046   1
   1  -5   2 573.463 49.7521   1
  -1  -5  -2 579.101 49.0895  12
   1  -5   2 603.143 48.8301  12
   1   5   2 605.148 48.5318  11
   1  -5   2 605.696 48.9295   6
  -1  -5  -2 563.076 49.5624   6
   1   5   2 632.457 50.0004   6
   1   5   2 566.040 49.2500   5
   1   5   2 578.825 48.4379  11
   1  -5   2 599.608 48.9732  10
  -1   5  -2 561.431 48.6683  10
  -1  -5  -2 599.460 48.8018   9
  -1   5  -2 604.296 48.8598   9
   1   5   2 628.010 49.1110   9
   1  -5   2 583.354 48.6730   9
  -1  -5  -2 512.138 52.1489   7
   1   5   2 599.437 50.7841   7
   1  -5   3 2453.88 195.663   1
  -1   5  -3 2382.07 195.164   1
   1   5   3 2363.57 194.533   1
  -1  -5  -3 2393.05 194.578  12
   1   5   3 2346.19 194.536  12
  -1   5  -3 2468.33 194.703  11
  -1   5  -3 2415.85 194.542  12
   1   5   3 2430.53 193.824  11
   1  -5   3 2586.86 194.634  12
   1  -5   3 2403.38 194.399   6
   1   5   3 2305.79 195.382   6
  -1  -5  -3 2366.00 195.346   6
  -1   5  -3 2485.06 193.582   5
  -1  -5  -3 2721.37 196.316   5
   1  -5   3 2399.59 193.224   5
   1   5   3 2363.27 195.217   5
   1  -5   3 2438.77 194.573  11
   1   5   3 2457.91 193.847  11
  -1   5  -3 2327.58 194.193  10
   1  -5   3 2442.88 194.490  10
  -1   5  -3 2411.40 194.293   9
  -1  -5  -3 2385.82 194.260   9
   1  -5   3 2397.25 194.173   9
   1   5   3 2507.62 194.581   9
  -1  -5  -3 2489.77 197.221   7
   1   5   3 2403.89 195.987   7
  -1  -5  -4 54.6727 5.34051   3
  -1  -5  -4 48.8194 7.35246   1
  -1   5  -4 59.6635 8.79013   1
   1  -5   4 52.5546 9.11403   1
   1   5   4 62.1780 7.90532  12
   1   5   4 57.8079 6.25558  11
  -1   5  -4 46.2379 7.33228  12
   1  -5   4 46.7754 7.25751  12
   1   5   4 53.2708 8.85118   5
  -1   5  -4 62.3038 7.08808   7
  -1  -5  -4 62.7853 9.40010   5
   1  -5   4 54.8729 6.26292   5
  -1   5  -4 55.8539 6.88376   5
   1   5   4 50.9857 6.06528  11
   1  -5   4 48.5115 7.27387  11
  -1   5  -4 54.3331 7.03604  10
   1  -5   4 58.6032 7.33291  10
  -1   5  -4 49.8362 7.49371  11
   1   5   4 50.0039 6.98920   9
   1  -5   4 47.0576 6.59066   9
  -1   5  -4 59.3458 6.93647   9
  -1  -5  -4 48.7250 6.79500   9
  -1  -5  -4 55.1363 10.6171   7
   1   5   4 42.1885 9.46917   7
  -1  -5  -5 773.100 61.6188   3
   1  -5   5 671.476 64.6890   1
  -1  -5  -5 827.232 61.3943   2
  -1  -5  -5 751.486 63.2647   1
   1  -5   5 779.572 63.4137  12
   1   5   5 756.479 63.3332  12
  -1   5  -5 755.984 63.1387  11
   1   5   5 795.108 61.7748  11
  -1  -5  -5 737.257 64.7626   5
   1  -5   5 727.722 62.3038   5
  -1   5  -5 735.798 62.8542   5
   1   5   5 738.440 61.6884  11
  -1   5  -5 748.320 62.4841  10
   1  -5   5 816.384 62.9224  10
   1   5   5 756.639 62.7510   9
  -1   5  -5 730.979 62.3654   9
  -1  -5  -5 752.911 62.5201   9
   1  -5   5 700.404 62.1925   9
  -1   5  -5 794.194 62.9872   7
  -1  -5  -5 751.312 65.6318   7
  -1  -5  -6 61.5210 6.26919   2
  -1  -5  -6 55.6568 6.78268   3
   1  -5   6 51.0330 10.2272   1
  -1  -5  -6 60.3691 8.49302   1
   1   5   6 53.9892 8.46480  12
   1   5   6 62.8502 6.43357  11
   1  -5   6 55.5826 8.75122  12
  -1  -5  -6 67.7248 11.0179   5
   1  -5   6 57.9782 7.83237   5
   1   5   6 67.3003 10.2899   6
  -1   5  -6 66.3476 8.86199   5
  -1   5  -6 57.5758 7.35228  10
   1  -5   6 77.3671 8.16859  10
   1   5   6 66.3692 6.59330  11
  -1   5  -6 65.4556 8.43024  11
   1   5   6 71.6581 8.09587   9
  -1  -5  -6 65.1582 7.62538   9
  -1   5  -6 72.1517 7.54831   9
   1  -5   6 60.5379 7.36186   9
  -1  -5  -6 55.2666 11.2133   7
  -1   5  -6 67.4598 8.66156   7
  -1  -5  -7 30.3804 5.24330   3
   1  -5   7 41.9423 9.88982   1
  -1  -5  -7 44.3301 7.33632   1
  -1  -5  -7 41.0419 4.71204   2
   1   5   7 45.2007 7.27136  12
   1  -5   7 51.0453 7.88901  12
   1   5   7 44.2807 4.58568  11
  -1  -5  -7 53.6460 10.6273   5
   1   5   7 29.9751 8.39293   6
   1  -5   7 37.4163 6.97399   5
  -1   5  -7 33.6746 7.40779   5
   1   5   7 37.4927 4.50602  11
  -1   5  -7 37.5759 6.62425  11
  -1   5  -7 32.6668 5.52922  10
   1  -5   7 42.8376 6.10545  10
   1  -5   7 38.3973 5.52030   9
  -1   5  -7 45.3206 5.82761   9
  -1  -5  -7 40.6685 5.93383   9
   1   5   7 36.2326 5.97298   9
  -1  -5  -7 48.8336 10.3212   7
  -1   5  -7 28.4993 6.96755   7
  -1  -5  -8 783.285 66.8084   3
  -1  -5  -8 832.792 66.1450   2
   1  -5   8 785.772 70.7126   1
  -1  -5  -8 834.600 68.5921   1
   1  -5   8 916.763 69.4607  13
   1  -5   8 889.604 69.0437  12
   1   5   8 827.680 68.6408  12
  -1   5  -8 792.635 67.7542  11
   1   5   8 894.082 65.6316  11
  -1  -5  -8 725.247 70.2256   5
  -1   5  -8 789.524 68.9517   5
   1   5   8 791.323 69.7068   6
   1  -5   8 816.293 67.1664  10
   1   5   8 821.272 65.6006  11
  -1   5  -8 792.375 66.9316  10
  -1   5  -8 827.206 66.6700   9
   1  -5   8 795.873 66.5142   9
   1   5   8 847.245 67.3082   9
  -1  -5  -8 759.667 70.6294   7
  -1  -5  -8 692.638 65.9237   8
  -1   5  -8 874.816 69.0055   7
  -1  -5  -9 133.816 12.5340   2
  -1  -5  -9 128.782 14.9919   1
   1   5   9 139.096 15.2122  12
   1  -5   9 150.865 16.0396  13
  -1   5  -9 120.573 13.8127  11
   1   5   9 140.764 11.4213  11
   1  -5   9 148.925 15.5953  12
  -1   5  -9 121.778 15.7344   5
  -1  -5  -9 124.803 17.4494   5
   1   5   9 140.680 16.7218   6
   1   5   9 133.242 11.4868  11
   1  -5   9 133.439 13.4634  10
   1   5   9 145.178 13.6394   9
   1  -5   9 128.387 12.6352   9
  -1   5  -9 124.390 12.5932   9
  -1  -5  -9 114.472 17.1765   7
  -1  -5  -9 135.052 12.3221   8
  -1   5  -9 136.096 15.4474   7
   1  -5  10 172.357 15.4853   4
  -1  -5 -10 186.264 16.7558   2
  -1  -5 -10 178.891 19.0892   1
   1   5  10 163.045 16.1323   2
   1  -5  10 202.603 19.9959  12
[truncated: 3,787,046 more chars]
