# Supplementary material for: Approach to the “Missing” Diarylsilylene: Formation, Characterization, and Intramolecular C–H Bond Activation of Blue Diarylsilylenes with Bulky Rind Groups
Source: Int J Mol Sci. 2024 Mar 28;25(7):3761. doi: 10.3390/ijms25073761 (PMC11011690; doi:10.3390/ijms25073761)
Supplement: Supplementary file 1 [file ijms-25-03761-s001.zip › CrystalA.cif]

data_Eind-Silylene

# start Validation Reply Form
_vrf_PLAT094_Eind-Silylene
;
PROBLEM: Ratio of Maximum / Minimum Residual Density ....       5.12 Report
RESPONSE: The crystal may contain a trace amount of 
water molecules that interat with the silylene moiety 
but this was not implemented in the refinement model 
due to a lack of crucial evidence for its presence.
;
_vrf_PLAT097_Eind-Silylene
;
PROBLEM: Large Reported Max.  (Positive) Residual Density       1.71 eA-3
RESPONSE: The crystal may contain a trace amount of 
water molecules that interat with the silylene moiety 
but this was not implemented in the refinement model 
due to a lack of crucial evidence for its presence.
;
# end Validation Reply Form

_audit_creation_method            'SHELXL-2019/3'
_shelx_SHELXL_version_number      '2019/3'
_chemical_name_systematic         ?
_chemical_name_common             ?
_chemical_melting_point           ?
_chemical_formula_moiety         'C56 H90 Si' 
_chemical_formula_sum            'C56 H90 Si' 
_chemical_formula_weight          791.36

loop_
 _atom_type_symbol
 _atom_type_description
 _atom_type_scat_dispersion_real
 _atom_type_scat_dispersion_imag
 _atom_type_scat_source
 'C'  'C'   0.0033   0.0016
 'International Tables Vol C Tables 4.2.6.8 and 6.1.1.4'
 'H'  'H'   0.0000   0.0000
 'International Tables Vol C Tables 4.2.6.8 and 6.1.1.4'
 'Si'  'Si'   0.0817   0.0704
 'International Tables Vol C Tables 4.2.6.8 and 6.1.1.4'
 
_space_group_crystal_system       monoclinic
_space_group_IT_number            15
_space_group_name_H-M_alt         'C 2/c'
_space_group_name_Hall            '-C 2yc'
 
_shelx_space_group_comment
;
The symmetry employed for this shelxl refinement is uniquely defined
by the following loop, which should always be used as a source of
symmetry information in preference to the above space-group names.
They are only intended as comments.
;
 
loop_
 _space_group_symop_operation_xyz
 'x, y, z'
 '-x, y, -z+1/2'
 'x+1/2, y+1/2, z'
 '-x+1/2, y+1/2, -z+1/2'
 '-x, -y, -z'
 'x, -y, z-1/2'
 '-x+1/2, -y+1/2, -z'
 'x+1/2, -y+1/2, z-1/2'
 
_cell_length_a                    32.720(7)
_cell_length_b                    18.594(4)
_cell_length_c                    16.662(4)
_cell_angle_alpha                 90
_cell_angle_beta                  104.756(3)
_cell_angle_gamma                 90
_cell_volume                      9803(4)
_cell_formula_units_Z             8
_cell_measurement_temperature     100
_cell_measurement_reflns_used     14839
_cell_measurement_theta_min       1.90
_cell_measurement_theta_max       31.36
 
_exptl_crystal_description        block
_exptl_crystal_colour             blue
_exptl_crystal_density_meas       ?
_exptl_crystal_density_method     ?
_exptl_crystal_density_diffrn     1.072
_exptl_crystal_F_000              3520
_exptl_transmission_factor_min    ?
_exptl_transmission_factor_max    ?
_exptl_crystal_size_max           0.280
_exptl_crystal_size_mid           0.180
_exptl_crystal_size_min           0.110
_exptl_absorpt_coefficient_mu     0.082
_shelx_estimated_absorpt_T_min    0.977
_shelx_estimated_absorpt_T_max    0.991
_exptl_absorpt_correction_type   'numerical'
_exptl_absorpt_correction_T_max   0.9929
_exptl_absorpt_correction_T_min   0.9813
_exptl_absorpt_process_details   'CrystalClear'
_exptl_absorpt_special_details    ?
_diffrn_ambient_temperature       100
_diffrn_radiation_wavelength      0.71073
_diffrn_radiation_type            MoK\a
_diffrn_source                   'Rotating anode'
_diffrn_measurement_device_type  'Rigaku Saturn724+'
_diffrn_measurement_method       '\w-scan'
_diffrn_detector_area_resol_mean  7.111
_diffrn_reflns_number             40049
_diffrn_reflns_av_unetI/netI      0.0564
_diffrn_reflns_av_R_equivalents   0.0556
_diffrn_reflns_limit_h_min        -42
_diffrn_reflns_limit_h_max        38
_diffrn_reflns_limit_k_min        -17
_diffrn_reflns_limit_k_max        24
_diffrn_reflns_limit_l_min        -21
_diffrn_reflns_limit_l_max        21
_diffrn_reflns_theta_min          1.672
_diffrn_reflns_theta_max          27.500
_diffrn_reflns_theta_full         25.242
_diffrn_measured_fraction_theta_max   0.998
_diffrn_measured_fraction_theta_full  0.998
_diffrn_reflns_Laue_measured_fraction_max    0.998
_diffrn_reflns_Laue_measured_fraction_full   0.998
_diffrn_reflns_point_group_measured_fraction_max   0.998
_diffrn_reflns_point_group_measured_fraction_full  0.998
_reflns_number_total              11249
_reflns_number_gt                 8955
_reflns_threshold_expression      'I > 2\s(I)'
_reflns_Friedel_coverage          0.000
_reflns_Friedel_fraction_max      .
_reflns_Friedel_fraction_full     .
 
_reflns_special_details
;
 Reflections were merged by SHELXL according to the crystal
 class for the calculation of statistics and refinement.
 
 _reflns_Friedel_fraction is defined as the number of unique
 Friedel pairs measured divided by the number that would be
 possible theoretically, ignoring centric projections and
 systematic absences.
;
 
_computing_data_collection       'CrystalClear'
_computing_cell_refinement       'CrystalClear'
_computing_data_reduction        'CrystalClear'
_computing_structure_solution    'SIR2008'
_computing_structure_refinement  'SHELXL-2019/3 (Sheldrick, 2019)'
_computing_molecular_graphics    'SHELXLE'
_computing_publication_material  'SHELXL-2019/3 (Sheldrick, 2019)'
_refine_special_details           ?
_refine_ls_structure_factor_coef  Fsqd
_refine_ls_matrix_type            full
_refine_ls_weighting_scheme       calc
_refine_ls_weighting_details
'w=1/[\s^2^(Fo^2^)+(0.0678P)^2^+14.2765P] where P=(Fo^2^+2Fc^2^)/3'
_atom_sites_solution_primary      direct
_atom_sites_solution_secondary    difmap
_atom_sites_solution_hydrogens    mixed
_refine_ls_hydrogen_treatment     mixed
_refine_ls_extinction_method      none
_refine_ls_extinction_coef        .
_refine_ls_number_reflns          11249
_refine_ls_number_parameters      540
_refine_ls_number_restraints      7
_refine_ls_R_factor_all           0.0969
_refine_ls_R_factor_gt            0.0757
_refine_ls_wR_factor_ref          0.1823
_refine_ls_wR_factor_gt           0.1704
_refine_ls_goodness_of_fit_ref    1.098
_refine_ls_restrained_S_all       1.110
_refine_ls_shift/su_max           0.000
_refine_ls_shift/su_mean          0.000
 
loop_
 _atom_site_label
 _atom_site_type_symbol
 _atom_site_fract_x
 _atom_site_fract_y
 _atom_site_fract_z
 _atom_site_U_iso_or_equiv
 _atom_site_adp_type
 _atom_site_occupancy
 _atom_site_site_symmetry_order  
 _atom_site_calc_flag
 _atom_site_refinement_flags_posn
 _atom_site_refinement_flags_adp
 _atom_site_refinement_flags_occupancy
 _atom_site_disorder_assembly
 _atom_site_disorder_group
Si1A Si 0.37770(5) 0.18987(8) 0.34607(9) 0.0184(3) Uani 0.711(3) 1 d . . P A 1
H1 H 0.3524(9) 0.1265(16) 0.3547(18) 0.011(7) Uiso 0.711(3) 1 d . . P A 1
C55A C 0.40096(10) 0.17153(17) 0.2543(2) 0.0239(7) Uani 0.711(3) 1 d . . P A 1
H55A H 0.421689 0.210817 0.253293 0.029 Uiso 0.711(3) 1 calc R U P A 1
C56A C 0.42467(11) 0.09912(18) 0.2553(2) 0.0322(7) Uani 0.711(3) 1 d . . P A 1
H56A H 0.405687 0.059249 0.259225 0.048 Uiso 0.711(3) 1 calc R U P A 1
H56B H 0.449328 0.097958 0.303208 0.048 Uiso 0.711(3) 1 calc R U P A 1
H56C H 0.433971 0.094429 0.204099 0.048 Uiso 0.711(3) 1 calc R U P A 1
Si1B Si 0.36833(12) 0.1777(2) 0.3590(2) 0.0184(3) Uani 0.289(3) 1 d . . P A 2
C55B C 0.41005(14) 0.1619(3) 0.2209(3) 0.0239(7) Uani 0.289(3) 1 d D . P A 2
H55C H 0.427822 0.204724 0.219264 0.029 Uiso 0.289(3) 1 calc R U P A 2
H55D H 0.411155 0.152363 0.279862 0.029 Uiso 0.289(3) 1 calc R U P A 2
C56B C 0.4296(2) 0.0978(4) 0.1871(5) 0.0322(7) Uani 0.289(3) 1 d D . P A 2
H56D H 0.415445 0.053523 0.197060 0.048 Uiso 0.289(3) 1 calc R U P A 2
H56E H 0.459756 0.094864 0.215222 0.048 Uiso 0.289(3) 1 calc R U P A 2
H56F H 0.426169 0.103992 0.127336 0.048 Uiso 0.289(3) 1 calc R U P A 2
C1 C 0.40921(7) 0.21316(11) 0.45675(12) 0.0198(4) Uani 1 1 d . . . . .
C2 C 0.40057(6) 0.17844(11) 0.52748(13) 0.0192(4) Uani 1 1 d . . . . .
C3 C 0.37746(7) 0.10625(11) 0.53511(13) 0.0213(4) Uani 1 1 d . . . . .
C4 C 0.38924(7) 0.09401(11) 0.63071(13) 0.0234(5) Uani 1 1 d . . . . .
H4A H 0.364541 0.074713 0.647795 0.028 Uiso 1 1 calc R U . . .
H4B H 0.412528 0.058625 0.646335 0.028 Uiso 1 1 calc R U . . .
C5 C 0.40313(7) 0.16634(11) 0.67512(13) 0.0215(4) Uani 1 1 d . . . . .
C6 C 0.41700(7) 0.20701(11) 0.60792(13) 0.0199(4) Uani 1 1 d . . . . .
C7 C 0.44315(7) 0.26706(11) 0.62072(13) 0.0203(4) Uani 1 1 d . . . . .
H7 H 0.453046 0.286810 0.674777 0.024 Uiso 1 1 calc R U . . .
C8 C 0.45467(6) 0.29790(11) 0.55396(13) 0.0187(4) Uani 1 1 d . . . . .
C9 C 0.48326(6) 0.36318(11) 0.55755(13) 0.0200(4) Uani 1 1 d . . . . .
C10 C 0.49342(7) 0.36002(12) 0.47197(13) 0.0235(5) Uani 1 1 d . . . . .
H10A H 0.522995 0.344186 0.478754 0.028 Uiso 1 1 calc R U . . .
H10B H 0.490171 0.408383 0.446282 0.028 Uiso 1 1 calc R U . . .
C11 C 0.46264(7) 0.30611(11) 0.41510(12) 0.0197(4) Uani 1 1 d . . . . .
C12 C 0.43923(6) 0.27040(11) 0.47401(12) 0.0190(4) Uani 1 1 d . . . . .
C13 C 0.39455(7) 0.04154(12) 0.49407(14) 0.0255(5) Uani 1 1 d . . . . .
H13A H 0.385156 -0.003457 0.515647 0.031 Uiso 1 1 calc R U . . .
H13B H 0.381431 0.043041 0.433593 0.031 Uiso 1 1 calc R U . . .
C14 C 0.44228(8) 0.03822(13) 0.50755(18) 0.0359(6) Uani 1 1 d . . . . .
H14A H 0.449739 -0.004213 0.479392 0.043 Uiso 1 1 calc R U . . .
H14B H 0.452061 0.081678 0.484831 0.043 Uiso 1 1 calc R U . . .
H14C H 0.455796 0.035048 0.567116 0.043 Uiso 1 1 calc R U . . .
C15 C 0.32865(7) 0.11124(12) 0.50150(14) 0.0249(5) Uani 1 1 d . . . . .
H15A H 0.318324 0.150431 0.531450 0.030 Uiso 1 1 calc R U . . .
H15B H 0.322193 0.125043 0.442207 0.030 Uiso 1 1 calc R U . . .
C16 C 0.30372(8) 0.04279(13) 0.50895(16) 0.0324(5) Uani 1 1 d . . . . .
H16A H 0.273470 0.051718 0.486093 0.039 Uiso 1 1 calc R U . . .
H16B H 0.312826 0.003729 0.478005 0.039 Uiso 1 1 calc R U . . .
H16C H 0.308945 0.029193 0.567515 0.039 Uiso 1 1 calc R U . . .
C17 C 0.43977(7) 0.15620(12) 0.75335(14) 0.0271(5) Uani 1 1 d . . . . .
H17A H 0.463101 0.130882 0.737282 0.032 Uiso 1 1 calc R U . . .
H17B H 0.450379 0.204254 0.774449 0.032 Uiso 1 1 calc R U . . .
C18 C 0.42863(9) 0.11424(14) 0.82414(15) 0.0365(6) Uani 1 1 d . . . . .
H18A H 0.453711 0.110503 0.870947 0.044 Uiso 1 1 calc R U . . .
H18B H 0.406162 0.139466 0.841973 0.044 Uiso 1 1 calc R U . . .
H18C H 0.418913 0.065925 0.804721 0.044 Uiso 1 1 calc R U . . .
C19 C 0.36468(7) 0.20422(12) 0.69514(14) 0.0251(5) Uani 1 1 d . . . . .
H19A H 0.342300 0.209412 0.642829 0.030 Uiso 1 1 calc R U . . .
H19B H 0.353460 0.172473 0.732212 0.030 Uiso 1 1 calc R U . . .
C20 C 0.37316(8) 0.27814(13) 0.73589(15) 0.0290(5) Uani 1 1 d . . . . .
H20A H 0.346960 0.297218 0.745841 0.035 Uiso 1 1 calc R U . . .
H20B H 0.394573 0.273805 0.788819 0.035 Uiso 1 1 calc R U . . .
H20C H 0.383380 0.310852 0.699172 0.035 Uiso 1 1 calc R U . . .
C21 C 0.52355(7) 0.35783(12) 0.62891(13) 0.0233(5) Uani 1 1 d . . . . .
H21A H 0.515303 0.355424 0.682040 0.028 Uiso 1 1 calc R U . . .
H21B H 0.538227 0.312361 0.622875 0.028 Uiso 1 1 calc R U . . .
C22 C 0.55468(7) 0.42047(13) 0.63335(15) 0.0291(5) Uani 1 1 d . . . . .
H22A H 0.579366 0.413050 0.680230 0.035 Uiso 1 1 calc R U . . .
H22B H 0.563739 0.422590 0.581688 0.035 Uiso 1 1 calc R U . . .
H22C H 0.540776 0.465728 0.640955 0.035 Uiso 1 1 calc R U . . .
C23 C 0.45810(7) 0.43298(11) 0.56286(13) 0.0238(5) Uani 1 1 d . . . . .
H23A H 0.474864 0.474380 0.551696 0.029 Uiso 1 1 calc R U . . .
H23B H 0.431597 0.431680 0.518045 0.029 Uiso 1 1 calc R U . . .
C24 C 0.44669(8) 0.44665(12) 0.64486(14) 0.0281(5) Uani 1 1 d . . . . .
H24A H 0.430943 0.491870 0.641307 0.034 Uiso 1 1 calc R U . . .
H24B H 0.429195 0.407006 0.656082 0.034 Uiso 1 1 calc R U . . .
H24C H 0.472602 0.449843 0.689841 0.034 Uiso 1 1 calc R U . . .
C25 C 0.48924(7) 0.24895(13) 0.38322(15) 0.0281(5) Uani 1 1 d . . . . .
H25A H 0.469824 0.217799 0.342487 0.034 Uiso 1 1 calc R U . . .
H25B H 0.507794 0.273945 0.353630 0.034 Uiso 1 1 calc R U . . .
C26 C 0.51675(8) 0.20110(14) 0.45068(18) 0.0373(6) Uani 1 1 d . . . . .
H26A H 0.532370 0.166773 0.425128 0.045 Uiso 1 1 calc R U . . .
H26B H 0.536766 0.231096 0.490595 0.045 Uiso 1 1 calc R U . . .
H26C H 0.498717 0.174832 0.479428 0.045 Uiso 1 1 calc R U . . .
C27 C 0.43232(7) 0.34760(12) 0.34430(13) 0.0225(4) Uani 1 1 d . . . . .
H27A H 0.409541 0.314452 0.315827 0.027 Uiso 1 1 calc R U . . .
H27B H 0.419003 0.386701 0.369047 0.027 Uiso 1 1 calc R U . . .
C28 C 0.45222(8) 0.38041(13) 0.27936(14) 0.0271(5) Uani 1 1 d . . . . .
H28A H 0.430465 0.405449 0.237318 0.032 Uiso 1 1 calc R U . . .
H28B H 0.474244 0.414650 0.306203 0.032 Uiso 1 1 calc R U . . .
H28C H 0.464757 0.342203 0.252836 0.032 Uiso 1 1 calc R U . . .
C29 C 0.34014(7) 0.25750(12) 0.28429(13) 0.0224(4) Uani 1 1 d . . . . .
C30 C 0.31553(7) 0.31740(12) 0.29623(13) 0.0224(4) Uani 1 1 d . . . . .
C31 C 0.30250(7) 0.34079(12) 0.37435(13) 0.0241(5) Uani 1 1 d . . . . .
C32 C 0.26998(8) 0.40278(15) 0.34205(15) 0.0336(6) Uani 1 1 d . . . . .
H32A H 0.241434 0.387469 0.345053 0.040 Uiso 1 1 calc R U . . .
H32B H 0.277978 0.445908 0.377412 0.040 Uiso 1 1 calc R U . . .
C33 C 0.26946(7) 0.42122(12) 0.25140(14) 0.0257(5) Uani 1 1 d D . . . .
C34 C 0.29758(7) 0.36341(11) 0.22970(13) 0.0236(5) Uani 1 1 d . . . . .
C35 C 0.30558(7) 0.35492(12) 0.15170(13) 0.0255(5) Uani 1 1 d . . . . .
H35 H 0.294868 0.388639 0.108644 0.031 Uiso 1 1 calc R U . . .
C36 C 0.32938(7) 0.29655(12) 0.13806(13) 0.0230(4) Uani 1 1 d . . . . .
C37 C 0.34548(7) 0.27859(12) 0.06272(13) 0.0228(4) Uani 1 1 d . . . . .
C38 C 0.36692(9) 0.20388(14) 0.08634(17) 0.0393(6) Uani 1 1 d D . . . .
H38A H 0.397110 0.206700 0.086142 0.047 Uiso 1 1 calc R U . . .
H38B H 0.353126 0.167479 0.044882 0.047 Uiso 1 1 calc R U . . .
C39 C 0.36306(7) 0.18094(12) 0.17440(15) 0.0280(5) Uani 1 1 d D . . . .
C40 C 0.34282(7) 0.24678(12) 0.20187(13) 0.0237(5) Uani 1 1 d . . . . .
C41 C 0.28239(8) 0.27848(14) 0.41142(15) 0.0328(6) Uani 1 1 d . . . . .
H41A H 0.305229 0.245919 0.441003 0.039 Uiso 1 1 calc R U . . .
H41B H 0.268705 0.298498 0.453111 0.039 Uiso 1 1 calc R U . . .
C42 C 0.24960(9) 0.23381(16) 0.34913(17) 0.0429(7) Uani 1 1 d . . . . .
H42A H 0.238714 0.195690 0.378643 0.052 Uiso 1 1 calc R U . . .
H42B H 0.226259 0.264956 0.320541 0.052 Uiso 1 1 calc R U . . .
H42C H 0.262880 0.212237 0.308400 0.052 Uiso 1 1 calc R U . . .
C43 C 0.34084(7) 0.36896(12) 0.44132(13) 0.0239(5) Uani 1 1 d . . . . .
H43A H 0.362607 0.330737 0.453702 0.029 Uiso 1 1 calc R U . . .
H43B H 0.353027 0.410400 0.418146 0.029 Uiso 1 1 calc R U . . .
C44 C 0.33144(8) 0.39246(14) 0.52293(14) 0.0332(6) Uani 1 1 d . . . . .
H44A H 0.357543 0.409417 0.561374 0.040 Uiso 1 1 calc R U . . .
H44B H 0.310586 0.431415 0.511989 0.040 Uiso 1 1 calc R U . . .
H44C H 0.320189 0.351560 0.547631 0.040 Uiso 1 1 calc R U . . .
C45 C 0.22433(9) 0.41300(15) 0.19403(16) 0.0386(6) Uani 1 1 d . . . . .
H45A H 0.226000 0.417632 0.135752 0.046 Uiso 1 1 calc R U . . .
H45B H 0.214167 0.363814 0.200995 0.046 Uiso 1 1 calc R U . . .
C46 C 0.19161(9) 0.46669(16) 0.20861(18) 0.0447(7) Uani 1 1 d . . . . .
H46A H 0.164258 0.457090 0.169483 0.054 Uiso 1 1 calc R U . . .
H46B H 0.188854 0.461732 0.265551 0.054 Uiso 1 1 calc R U . . .
H46C H 0.200718 0.515694 0.200132 0.054 Uiso 1 1 calc R U . . .
C47A C 0.28286(9) 0.49888(15) 0.2338(2) 0.0265(7) Uani 0.740(3) 1 d D . P B 3
H47A H 0.277237 0.505658 0.173001 0.032 Uiso 0.740(3) 1 calc R U P B 3
H47B H 0.265168 0.533761 0.254699 0.032 Uiso 0.740(3) 1 calc R U P B 3
C48A C 0.32921(11) 0.51537(18) 0.2734(2) 0.0375(8) Uani 0.740(3) 1 d D . P B 3
H48A H 0.334735 0.511499 0.333841 0.056 Uiso 0.740(3) 1 calc R U P B 3
H48B H 0.335700 0.564274 0.258474 0.056 Uiso 0.740(3) 1 calc R U P B 3
H48C H 0.347004 0.480951 0.253260 0.056 Uiso 0.740(3) 1 calc R U P B 3
C47B C 0.2977(3) 0.4894(3) 0.2755(4) 0.0265(7) Uani 0.260(3) 1 d D . P B 4
H47C H 0.283074 0.523898 0.303857 0.032 Uiso 0.260(3) 1 calc R U P B 4
H47D H 0.324459 0.475269 0.315444 0.032 Uiso 0.260(3) 1 calc R U P B 4
C48B C 0.3081(3) 0.5268(4) 0.2019(6) 0.0375(8) Uani 0.260(3) 1 d D . P B 4
H48D H 0.326399 0.495761 0.178629 0.056 Uiso 0.260(3) 1 calc R U P B 4
H48E H 0.322712 0.572235 0.220292 0.056 Uiso 0.260(3) 1 calc R U P B 4
H48F H 0.281906 0.536599 0.159399 0.056 Uiso 0.260(3) 1 calc R U P B 4
C49 C 0.30929(8) 0.27644(14) -0.01690(14) 0.0316(5) Uani 1 1 d . . . . .
H49A H 0.289408 0.237807 -0.011153 0.038 Uiso 1 1 calc R U . . .
H49B H 0.293738 0.322568 -0.021864 0.038 Uiso 1 1 calc R U . . .
C50 C 0.32268(10) 0.26389(17) -0.09680(16) 0.0464(7) Uani 1 1 d . . . . .
H50A H 0.297624 0.263384 -0.143900 0.056 Uiso 1 1 calc R U . . .
H50B H 0.341695 0.302591 -0.104352 0.056 Uiso 1 1 calc R U . . .
H50C H 0.337355 0.217625 -0.093615 0.056 Uiso 1 1 calc R U . . .
C51 C 0.37985(8) 0.33290(13) 0.05353(15) 0.0313(5) Uani 1 1 d . . . . .
H51A H 0.401909 0.334087 0.106680 0.038 Uiso 1 1 calc R U . . .
H51B H 0.393243 0.314247 0.010736 0.038 Uiso 1 1 calc R U . . .
C52 C 0.36577(10) 0.40999(14) 0.03050(18) 0.0428(7) Uani 1 1 d . . . . .
H52A H 0.390229 0.438916 0.026590 0.051 Uiso 1 1 calc R U . . .
H52B H 0.344671 0.410351 -0.023104 0.051 Uiso 1 1 calc R U . . .
H52C H 0.353371 0.430269 0.073216 0.051 Uiso 1 1 calc R U . . .
C53 C 0.33427(8) 0.11370(13) 0.16729(14) 0.0287(5) Uani 1 1 d . . . . .
H53A H 0.346860 0.074550 0.141190 0.034 Uiso 1 1 calc R U . . .
H53B H 0.334377 0.097779 0.224040 0.034 Uiso 1 1 calc R U . . .
C54 C 0.28862(8) 0.12352(14) 0.11820(18) 0.0375(6) Uani 1 1 d . . . . .
H54A H 0.276203 0.164360 0.140739 0.056 Uiso 1 1 calc R U . . .
H54B H 0.272560 0.079804 0.122389 0.056 Uiso 1 1 calc R U . . .
H54C H 0.287668 0.132724 0.059844 0.056 Uiso 1 1 calc R U . . .
 
loop_
 _atom_site_aniso_label
 _atom_site_aniso_U_11
 _atom_site_aniso_U_22
 _atom_site_aniso_U_33
 _atom_site_aniso_U_23
 _atom_site_aniso_U_13
 _atom_site_aniso_U_12
Si1A 0.0179(7) 0.0202(6) 0.0165(5) -0.0008(4) 0.0033(4) -0.0020(4)
C55A 0.0234(15) 0.0247(15) 0.0240(17) -0.0054(13) 0.0069(12) 0.0050(11)
C56A 0.0334(17) 0.0281(16) 0.0330(16) -0.0015(13) 0.0047(14) 0.0059(13)
Si1B 0.0179(7) 0.0202(6) 0.0165(5) -0.0008(4) 0.0033(4) -0.0020(4)
C55B 0.0234(15) 0.0247(15) 0.0240(17) -0.0054(13) 0.0069(12) 0.0050(11)
C56B 0.0334(17) 0.0281(16) 0.0330(16) -0.0015(13) 0.0047(14) 0.0059(13)
C1 0.0234(10) 0.0166(10) 0.0170(9) -0.0001(8) 0.0007(8) 0.0008(8)
C2 0.0192(10) 0.0158(10) 0.0203(10) -0.0004(8) 0.0011(8) -0.0008(8)
C3 0.0217(10) 0.0184(10) 0.0226(10) 0.0008(8) 0.0035(8) -0.0031(8)
C4 0.0273(11) 0.0194(11) 0.0216(10) 0.0021(8) 0.0026(9) -0.0036(8)
C5 0.0250(11) 0.0187(10) 0.0189(10) 0.0016(8) 0.0023(8) -0.0040(8)
C6 0.0210(10) 0.0185(10) 0.0192(10) 0.0015(8) 0.0034(8) 0.0001(8)
C7 0.0225(10) 0.0188(10) 0.0175(10) -0.0017(8) 0.0013(8) -0.0016(8)
C8 0.0181(10) 0.0167(10) 0.0201(10) -0.0001(8) 0.0026(8) -0.0005(8)
C9 0.0204(10) 0.0189(10) 0.0188(10) 0.0011(8) 0.0017(8) -0.0027(8)
C10 0.0238(11) 0.0236(11) 0.0223(11) 0.0002(8) 0.0044(9) -0.0051(9)
C11 0.0210(10) 0.0199(10) 0.0173(9) 0.0007(8) 0.0036(8) -0.0016(8)
C12 0.0200(10) 0.0179(10) 0.0175(10) 0.0015(8) 0.0018(8) 0.0023(8)
C13 0.0287(12) 0.0191(11) 0.0272(11) -0.0014(9) 0.0046(9) -0.0018(9)
C14 0.0350(14) 0.0258(13) 0.0472(15) -0.0012(11) 0.0112(12) 0.0014(10)
C15 0.0245(11) 0.0258(11) 0.0220(11) -0.0020(9) 0.0016(9) -0.0049(9)
C16 0.0273(12) 0.0297(13) 0.0389(14) -0.0038(10) 0.0060(10) -0.0083(10)
C17 0.0308(12) 0.0250(12) 0.0218(11) 0.0020(9) 0.0000(9) -0.0045(9)
C18 0.0456(15) 0.0352(14) 0.0244(12) 0.0068(10) 0.0008(11) -0.0069(11)
C19 0.0270(11) 0.0273(12) 0.0215(10) -0.0003(9) 0.0070(9) -0.0045(9)
C20 0.0320(12) 0.0288(12) 0.0275(12) -0.0034(9) 0.0099(10) -0.0043(10)
C21 0.0229(11) 0.0235(11) 0.0210(10) 0.0028(8) 0.0011(9) -0.0027(8)
C22 0.0247(11) 0.0303(13) 0.0278(12) 0.0031(9) -0.0014(9) -0.0086(9)
C23 0.0254(11) 0.0188(11) 0.0238(11) 0.0007(8) 0.0001(9) -0.0032(8)
C24 0.0336(12) 0.0243(12) 0.0231(11) -0.0020(9) 0.0013(9) 0.0009(9)
C25 0.0251(11) 0.0282(12) 0.0313(12) -0.0016(9) 0.0078(10) -0.0001(9)
C26 0.0286(13) 0.0322(14) 0.0517(16) 0.0093(12) 0.0114(12) 0.0060(10)
C27 0.0228(11) 0.0242(11) 0.0195(10) 0.0035(8) 0.0035(8) 0.0000(8)
C28 0.0320(12) 0.0287(12) 0.0207(11) 0.0019(9) 0.0071(9) -0.0029(9)
C29 0.0217(10) 0.0252(11) 0.0179(10) 0.0020(8) 0.0004(8) -0.0073(8)
C30 0.0220(10) 0.0263(11) 0.0170(10) 0.0010(8) 0.0015(8) -0.0063(8)
C31 0.0213(11) 0.0331(12) 0.0175(10) 0.0019(9) 0.0040(8) -0.0023(9)
C32 0.0240(12) 0.0530(16) 0.0236(12) 0.0037(11) 0.0056(9) 0.0065(11)
C33 0.0337(12) 0.0210(11) 0.0246(11) -0.0017(8) 0.0114(9) -0.0026(9)
C34 0.0290(11) 0.0206(11) 0.0204(10) -0.0001(8) 0.0048(9) -0.0033(9)
C35 0.0343(12) 0.0228(11) 0.0189(10) 0.0030(8) 0.0062(9) 0.0006(9)
C36 0.0251(11) 0.0262(11) 0.0167(10) -0.0003(8) 0.0033(8) -0.0026(9)
C37 0.0225(11) 0.0259(11) 0.0200(10) -0.0010(8) 0.0055(8) 0.0000(9)
C38 0.0435(15) 0.0300(14) 0.0550(17) 0.0093(12) 0.0316(14) 0.0106(11)
C39 0.0234(11) 0.0227(12) 0.0336(13) 0.0043(9) -0.0007(9) -0.0007(9)
C40 0.0267(11) 0.0226(11) 0.0186(10) -0.0006(8) -0.0005(8) -0.0067(9)
C41 0.0308(12) 0.0442(15) 0.0238(11) 0.0019(10) 0.0079(10) -0.0108(11)
C42 0.0392(15) 0.0574(18) 0.0332(14) -0.0023(12) 0.0111(12) -0.0241(13)
C43 0.0203(10) 0.0295(12) 0.0206(10) -0.0043(9) 0.0029(8) 0.0006(9)
C44 0.0309(13) 0.0431(15) 0.0241(12) -0.0070(10) 0.0044(10) 0.0019(11)
C45 0.0468(15) 0.0381(15) 0.0264(12) 0.0018(10) 0.0009(11) 0.0188(12)
C46 0.0511(17) 0.0452(17) 0.0389(15) 0.0094(12) 0.0136(13) 0.0234(13)
C47A 0.0322(17) 0.0209(14) 0.0267(18) 0.0016(13) 0.0085(13) 0.0001(12)
C48A 0.0400(19) 0.0287(17) 0.0427(18) 0.0011(14) 0.0088(15) -0.0066(14)
C47B 0.0322(17) 0.0209(14) 0.0267(18) 0.0016(13) 0.0085(13) 0.0001(12)
C48B 0.0400(19) 0.0287(17) 0.0427(18) 0.0011(14) 0.0088(15) -0.0066(14)
C49 0.0325(13) 0.0434(15) 0.0177(11) -0.0044(10) 0.0044(9) -0.0067(11)
C50 0.0599(19) 0.0588(19) 0.0220(12) -0.0112(12) 0.0135(12) -0.0170(15)
C51 0.0299(12) 0.0385(14) 0.0259(12) 0.0012(10) 0.0079(10) -0.0070(10)
C52 0.0648(19) 0.0313(14) 0.0390(15) -0.0057(11) 0.0253(14) -0.0141(13)
C53 0.0339(13) 0.0264(12) 0.0227(11) -0.0020(9) 0.0016(9) -0.0072(9)
C54 0.0286(13) 0.0301(13) 0.0541(17) -0.0117(12) 0.0114(12) -0.0060(10)
 
_geom_special_details
;
 All esds (except the esd in the dihedral angle between two l.s. planes)
 are estimated using the full covariance matrix.  The cell esds are taken
 into account individually in the estimation of esds in distances, angles
 and torsion angles; correlations between esds in cell parameters are only
 used when they are defined by crystal symmetry.  An approximate (isotropic)
 treatment of cell esds is used for estimating esds involving l.s. planes.
;
 
loop_
 _geom_bond_atom_site_label_1
 _geom_bond_atom_site_label_2
 _geom_bond_distance
 _geom_bond_site_symmetry_2
 _geom_bond_publ_flag
Si1A C29 1.873(3) . ?
Si1A C55A 1.904(4) . ?
Si1A C1 1.919(2) . ?
C55A C56A 1.552(4) . ?
C55A C39 1.581(4) . ?
Si1B C1 1.941(5) . ?
Si1B C29 2.004(5) . ?
C55B C56B 1.527(3) . ?
C55B C39 1.576(3) . ?
C1 C12 1.427(3) . ?
C1 C2 1.433(3) . ?
C2 C6 1.414(3) . ?
C2 C3 1.562(3) . ?
C3 C15 1.555(3) . ?
C3 C13 1.557(3) . ?
C3 C4 1.557(3) . ?
C4 C5 1.546(3) . ?
C5 C6 1.513(3) . ?
C5 C17 1.542(3) . ?
C5 C19 1.550(3) . ?
C6 C7 1.390(3) . ?
C7 C8 1.386(3) . ?
C8 C12 1.396(3) . ?
C8 C9 1.524(3) . ?
C9 C21 1.537(3) . ?
C9 C10 1.545(3) . ?
C9 C23 1.552(3) . ?
C10 C11 1.559(3) . ?
C11 C12 1.541(3) . ?
C11 C27 1.541(3) . ?
C11 C25 1.551(3) . ?
C13 C14 1.521(3) . ?
C15 C16 1.534(3) . ?
C17 C18 1.533(3) . ?
C19 C20 1.527(3) . ?
C21 C22 1.537(3) . ?
C23 C24 1.527(3) . ?
C25 C26 1.533(3) . ?
C27 C28 1.525(3) . ?
C29 C40 1.412(3) . ?
C29 C30 1.418(3) . ?
C30 C34 1.405(3) . ?
C30 C31 1.532(3) . ?
C31 C41 1.537(3) . ?
C31 C43 1.543(3) . ?
C31 C32 1.568(3) . ?
C32 C33 1.545(3) . ?
C33 C34 1.517(3) . ?
C33 C45 1.549(3) . ?
C33 C47A 1.559(3) . ?
C33 C47B 1.560(4) . ?
C34 C35 1.398(3) . ?
C35 C36 1.388(3) . ?
C36 C40 1.394(3) . ?
C36 C37 1.517(3) . ?
C37 C49 1.537(3) . ?
C37 C51 1.548(3) . ?
C37 C38 1.561(3) . ?
C38 C39 1.564(3) . ?
C39 C40 1.517(3) . ?
C39 C53 1.552(3) . ?
C41 C42 1.533(3) . ?
C43 C44 1.532(3) . ?
C45 C46 1.528(3) . ?
C47A C48A 1.523(4) . ?
C47B C48B 1.522(4) . ?
C49 C50 1.522(3) . ?
C51 C52 1.525(4) . ?
C53 C54 1.520(3) . ?
 
loop_
 _geom_angle_atom_site_label_1
 _geom_angle_atom_site_label_2
 _geom_angle_atom_site_label_3
 _geom_angle
 _geom_angle_site_symmetry_1
 _geom_angle_site_symmetry_3
 _geom_angle_publ_flag
C29 Si1A C55A 91.12(13) . . ?
C29 Si1A C1 119.57(12) . . ?
C55A Si1A C1 125.82(14) . . ?
C56A C55A C39 112.8(2) . . ?
C56A C55A Si1A 116.6(2) . . ?
C39 C55A Si1A 105.56(19) . . ?
C1 Si1B C29 112.3(2) . . ?
C56B C55B C39 116.2(3) . . ?
C12 C1 C2 116.10(18) . . ?
C12 C1 Si1A 122.38(16) . . ?
C2 C1 Si1A 121.21(16) . . ?
C12 C1 Si1B 135.57(19) . . ?
C2 C1 Si1B 107.40(18) . . ?
C6 C2 C1 120.20(18) . . ?
C6 C2 C3 108.70(17) . . ?
C1 C2 C3 130.92(18) . . ?
C15 C3 C13 109.81(17) . . ?
C15 C3 C4 109.95(18) . . ?
C13 C3 C4 108.26(17) . . ?
C15 C3 C2 113.18(17) . . ?
C13 C3 C2 113.15(17) . . ?
C4 C3 C2 102.13(16) . . ?
C5 C4 C3 109.16(17) . . ?
C6 C5 C17 111.81(18) . . ?
C6 C5 C4 100.81(17) . . ?
C17 C5 C4 111.63(18) . . ?
C6 C5 C19 110.18(17) . . ?
C17 C5 C19 111.88(18) . . ?
C4 C5 C19 110.02(17) . . ?
C7 C6 C2 121.18(19) . . ?
C7 C6 C5 125.22(19) . . ?
C2 C6 C5 113.60(18) . . ?
C8 C7 C6 119.46(19) . . ?
C7 C8 C12 120.52(19) . . ?
C7 C8 C9 125.99(18) . . ?
C12 C8 C9 113.48(18) . . ?
C8 C9 C21 112.05(17) . . ?
C8 C9 C10 101.98(16) . . ?
C21 C9 C10 111.57(17) . . ?
C8 C9 C23 109.82(17) . . ?
C21 C9 C23 111.90(17) . . ?
C10 C9 C23 109.05(17) . . ?
C9 C10 C11 109.14(17) . . ?
C12 C11 C27 112.07(17) . . ?
C12 C11 C25 109.65(17) . . ?
C27 C11 C25 112.89(17) . . ?
C12 C11 C10 103.83(16) . . ?
C27 C11 C10 109.50(17) . . ?
C25 C11 C10 108.46(17) . . ?
C8 C12 C1 121.92(19) . . ?
C8 C12 C11 109.40(17) . . ?
C1 C12 C11 128.43(18) . . ?
C14 C13 C3 115.89(19) . . ?
C16 C15 C3 116.10(19) . . ?
C18 C17 C5 115.25(19) . . ?
C20 C19 C5 116.05(19) . . ?
C22 C21 C9 114.54(17) . . ?
C24 C23 C9 116.40(18) . . ?
C26 C25 C11 115.0(2) . . ?
C28 C27 C11 115.80(18) . . ?
C40 C29 C30 115.18(19) . . ?
C40 C29 Si1A 104.18(17) . . ?
C30 C29 Si1A 140.09(17) . . ?
C40 C29 Si1B 111.5(2) . . ?
C30 C29 Si1B 133.1(2) . . ?
C34 C30 C29 120.4(2) . . ?
C34 C30 C31 110.27(19) . . ?
C29 C30 C31 129.28(19) . . ?
C30 C31 C41 111.56(19) . . ?
C30 C31 C43 111.09(17) . . ?
C41 C31 C43 108.52(18) . . ?
C30 C31 C32 103.20(17) . . ?
C41 C31 C32 111.68(19) . . ?
C43 C31 C32 110.76(19) . . ?
C33 C32 C31 109.66(19) . . ?
C34 C33 C32 102.68(18) . . ?
C34 C33 C45 108.88(18) . . ?
C32 C33 C45 110.7(2) . . ?
C34 C33 C47A 113.2(2) . . ?
C32 C33 C47A 117.1(2) . . ?
C45 C33 C47A 104.2(2) . . ?
C34 C33 C47B 106.3(4) . . ?
C32 C33 C47B 94.0(3) . . ?
C45 C33 C47B 130.4(4) . . ?
C35 C34 C30 121.7(2) . . ?
C35 C34 C33 124.7(2) . . ?
C30 C34 C33 113.60(19) . . ?
C36 C35 C34 119.1(2) . . ?
C35 C36 C40 118.4(2) . . ?
C35 C36 C37 129.44(19) . . ?
C40 C36 C37 112.11(19) . . ?
C36 C37 C49 111.48(18) . . ?
C36 C37 C51 110.63(18) . . ?
C49 C37 C51 110.55(18) . . ?
C36 C37 C38 102.46(18) . . ?
C49 C37 C38 113.1(2) . . ?
C51 C37 C38 108.33(19) . . ?
C37 C38 C39 109.92(19) . . ?
C40 C39 C53 111.72(19) . . ?
C40 C39 C38 102.05(18) . . ?
C53 C39 C38 109.9(2) . . ?
C40 C39 C55B 118.6(3) . . ?
C53 C39 C55B 110.7(3) . . ?
C38 C39 C55B 102.7(3) . . ?
C40 C39 C55A 98.29(19) . . ?
C53 C39 C55A 107.8(2) . . ?
C38 C39 C55A 125.9(2) . . ?
C36 C40 C29 124.2(2) . . ?
C36 C40 C39 112.52(19) . . ?
C29 C40 C39 123.2(2) . . ?
C42 C41 C31 115.7(2) . . ?
C44 C43 C31 115.38(19) . . ?
C46 C45 C33 115.7(2) . . ?
C48A C47A C33 113.7(2) . . ?
C48B C47B C33 113.8(3) . . ?
C50 C49 C37 115.4(2) . . ?
C52 C51 C37 117.3(2) . . ?
C54 C53 C39 116.0(2) . . ?
 
loop_
 _geom_torsion_atom_site_label_1
 _geom_torsion_atom_site_label_2
 _geom_torsion_atom_site_label_3
 _geom_torsion_atom_site_label_4
 _geom_torsion
 _geom_torsion_site_symmetry_1
 _geom_torsion_site_symmetry_2
 _geom_torsion_site_symmetry_3
 _geom_torsion_site_symmetry_4
 _geom_torsion_publ_flag
C12 C1 C2 C6 8.2(3) . . . . ?
Si1A C1 C2 C6 -165.68(17) . . . . ?
Si1B C1 C2 C6 -162.6(2) . . . . ?
C12 C1 C2 C3 -166.3(2) . . . . ?
Si1A C1 C2 C3 19.9(3) . . . . ?
Si1B C1 C2 C3 23.0(3) . . . . ?
C6 C2 C3 C15 110.2(2) . . . . ?
C1 C2 C3 C15 -74.9(3) . . . . ?
C6 C2 C3 C13 -124.09(19) . . . . ?
C1 C2 C3 C13 50.9(3) . . . . ?
C6 C2 C3 C4 -8.0(2) . . . . ?
C1 C2 C3 C4 167.0(2) . . . . ?
C15 C3 C4 C5 -100.3(2) . . . . ?
C13 C3 C4 C5 139.78(18) . . . . ?
C2 C3 C4 C5 20.2(2) . . . . ?
C3 C4 C5 C6 -23.8(2) . . . . ?
C3 C4 C5 C17 -142.70(19) . . . . ?
C3 C4 C5 C19 92.5(2) . . . . ?
C1 C2 C6 C7 -2.8(3) . . . . ?
C3 C2 C6 C7 172.83(19) . . . . ?
C1 C2 C6 C5 177.00(18) . . . . ?
C3 C2 C6 C5 -7.4(2) . . . . ?
C17 C5 C6 C7 -42.2(3) . . . . ?
C4 C5 C6 C7 -160.9(2) . . . . ?
C19 C5 C6 C7 82.9(2) . . . . ?
C17 C5 C6 C2 138.05(19) . . . . ?
C4 C5 C6 C2 19.3(2) . . . . ?
C19 C5 C6 C2 -96.9(2) . . . . ?
C2 C6 C7 C8 -2.5(3) . . . . ?
C5 C6 C7 C8 177.8(2) . . . . ?
C6 C7 C8 C12 1.9(3) . . . . ?
C6 C7 C8 C9 -179.49(19) . . . . ?
C7 C8 C9 C21 46.8(3) . . . . ?
C12 C8 C9 C21 -134.48(19) . . . . ?
C7 C8 C9 C10 166.3(2) . . . . ?
C12 C8 C9 C10 -15.0(2) . . . . ?
C7 C8 C9 C23 -78.2(2) . . . . ?
C12 C8 C9 C23 100.5(2) . . . . ?
C8 C9 C10 C11 13.5(2) . . . . ?
C21 C9 C10 C11 133.24(18) . . . . ?
C23 C9 C10 C11 -102.63(19) . . . . ?
C9 C10 C11 C12 -8.1(2) . . . . ?
C9 C10 C11 C27 111.75(19) . . . . ?
C9 C10 C11 C25 -124.66(19) . . . . ?
C7 C8 C12 C1 4.1(3) . . . . ?
C9 C8 C12 C1 -174.71(18) . . . . ?
C7 C8 C12 C11 -170.60(18) . . . . ?
C9 C8 C12 C11 10.6(2) . . . . ?
C2 C1 C12 C8 -8.9(3) . . . . ?
Si1A C1 C12 C8 164.85(17) . . . . ?
Si1B C1 C12 C8 158.4(3) . . . . ?
C2 C1 C12 C11 164.64(19) . . . . ?
Si1A C1 C12 C11 -21.6(3) . . . . ?
Si1B C1 C12 C11 -28.0(4) . . . . ?
C27 C11 C12 C8 -119.35(19) . . . . ?
C25 C11 C12 C8 114.47(19) . . . . ?
C10 C11 C12 C8 -1.3(2) . . . . ?
C27 C11 C12 C1 66.4(3) . . . . ?
C25 C11 C12 C1 -59.8(3) . . . . ?
C10 C11 C12 C1 -175.5(2) . . . . ?
C15 C3 C13 C14 168.46(19) . . . . ?
C4 C3 C13 C14 -71.5(2) . . . . ?
C2 C3 C13 C14 40.9(3) . . . . ?
C13 C3 C15 C16 54.0(3) . . . . ?
C4 C3 C15 C16 -65.1(2) . . . . ?
C2 C3 C15 C16 -178.54(19) . . . . ?
C6 C5 C17 C18 -179.0(2) . . . . ?
C4 C5 C17 C18 -66.9(3) . . . . ?
C19 C5 C17 C18 56.9(3) . . . . ?
C6 C5 C19 C20 -67.2(2) . . . . ?
C17 C5 C19 C20 57.9(2) . . . . ?
C4 C5 C19 C20 -177.46(18) . . . . ?
C8 C9 C21 C22 177.32(19) . . . . ?
C10 C9 C21 C22 63.7(2) . . . . ?
C23 C9 C21 C22 -58.8(3) . . . . ?
C8 C9 C23 C24 71.3(2) . . . . ?
C21 C9 C23 C24 -53.8(2) . . . . ?
C10 C9 C23 C24 -177.76(18) . . . . ?
C12 C11 C25 C26 -48.6(2) . . . . ?
C27 C11 C25 C26 -174.27(19) . . . . ?
C10 C11 C25 C26 64.2(2) . . . . ?
C12 C11 C27 C28 -175.89(18) . . . . ?
C25 C11 C27 C28 -51.5(3) . . . . ?
C10 C11 C27 C28 69.5(2) . . . . ?
C55A Si1A C29 C40 12.23(18) . . . . ?
C1 Si1A C29 C40 145.40(16) . . . . ?
C55A Si1A C29 C30 -158.3(3) . . . . ?
C1 Si1A C29 C30 -25.1(3) . . . . ?
C40 C29 C30 C34 -3.2(3) . . . . ?
Si1A C29 C30 C34 166.6(2) . . . . ?
Si1B C29 C30 C34 -176.5(2) . . . . ?
C40 C29 C30 C31 173.7(2) . . . . ?
Si1A C29 C30 C31 -16.5(4) . . . . ?
Si1B C29 C30 C31 0.4(4) . . . . ?
C34 C30 C31 C41 126.0(2) . . . . ?
C29 C30 C31 C41 -51.1(3) . . . . ?
C34 C30 C31 C43 -112.8(2) . . . . ?
C29 C30 C31 C43 70.1(3) . . . . ?
C34 C30 C31 C32 6.0(2) . . . . ?
C29 C30 C31 C32 -171.2(2) . . . . ?
C30 C31 C32 C33 -7.9(2) . . . . ?
C41 C31 C32 C33 -127.8(2) . . . . ?
C43 C31 C32 C33 111.1(2) . . . . ?
C31 C32 C33 C34 6.7(2) . . . . ?
C31 C32 C33 C45 122.8(2) . . . . ?
C31 C32 C33 C47A -118.0(2) . . . . ?
C31 C32 C33 C47B -101.0(4) . . . . ?
C29 C30 C34 C35 -4.4(3) . . . . ?
C31 C30 C34 C35 178.2(2) . . . . ?
C29 C30 C34 C33 175.46(19) . . . . ?
C31 C30 C34 C33 -2.0(3) . . . . ?
C32 C33 C34 C35 176.9(2) . . . . ?
C45 C33 C34 C35 59.5(3) . . . . ?
C47A C33 C34 C35 -55.9(3) . . . . ?
C47B C33 C34 C35 -85.0(3) . . . . ?
C32 C33 C34 C30 -3.0(2) . . . . ?
C45 C33 C34 C30 -120.4(2) . . . . ?
C47A C33 C34 C30 124.2(2) . . . . ?
C47B C33 C34 C30 95.1(3) . . . . ?
C30 C34 C35 C36 4.7(3) . . . . ?
C33 C34 C35 C36 -175.2(2) . . . . ?
C34 C35 C36 C40 2.8(3) . . . . ?
C34 C35 C36 C37 -174.3(2) . . . . ?
C35 C36 C37 C49 -55.0(3) . . . . ?
C40 C36 C37 C49 127.7(2) . . . . ?
C35 C36 C37 C51 68.4(3) . . . . ?
C40 C36 C37 C51 -108.8(2) . . . . ?
C35 C36 C37 C38 -176.3(2) . . . . ?
C40 C36 C37 C38 6.5(2) . . . . ?
C36 C37 C38 C39 -0.5(3) . . . . ?
C49 C37 C38 C39 -120.6(2) . . . . ?
C51 C37 C38 C39 116.5(2) . . . . ?
C37 C38 C39 C40 -4.9(2) . . . . ?
C37 C38 C39 C53 113.8(2) . . . . ?
C37 C38 C39 C55B -128.3(3) . . . . ?
C37 C38 C39 C55A -114.6(3) . . . . ?
C56B C55B C39 C40 -176.4(5) . . . . ?
C56B C55B C39 C53 52.5(7) . . . . ?
C56B C55B C39 C38 -64.8(6) . . . . ?
C56A C55A C39 C40 169.4(3) . . . . ?
Si1A C55A C39 C40 41.0(2) . . . . ?
C56A C55A C39 C53 53.3(3) . . . . ?
Si1A C55A C39 C53 -75.1(2) . . . . ?
C56A C55A C39 C38 -79.1(3) . . . . ?
Si1A C55A C39 C38 152.4(2) . . . . ?
C35 C36 C40 C29 -11.2(3) . . . . ?
C37 C36 C40 C29 166.4(2) . . . . ?
C35 C36 C40 C39 172.0(2) . . . . ?
C37 C36 C40 C39 -10.4(3) . . . . ?
C30 C29 C40 C36 11.2(3) . . . . ?
Si1A C29 C40 C36 -162.10(19) . . . . ?
Si1B C29 C40 C36 -174.1(2) . . . . ?
C30 C29 C40 C39 -172.35(19) . . . . ?
Si1A C29 C40 C39 14.4(2) . . . . ?
Si1B C29 C40 C39 2.4(3) . . . . ?
C53 C39 C40 C36 -108.2(2) . . . . ?
C38 C39 C40 C36 9.2(2) . . . . ?
C55B C39 C40 C36 121.2(4) . . . . ?
C55A C39 C40 C36 138.8(2) . . . . ?
C53 C39 C40 C29 75.0(3) . . . . ?
C38 C39 C40 C29 -167.6(2) . . . . ?
C55B C39 C40 C29 -55.7(4) . . . . ?
C55A C39 C40 C29 -38.0(3) . . . . ?
C30 C31 C41 C42 -45.3(3) . . . . ?
C43 C31 C41 C42 -168.0(2) . . . . ?
C32 C31 C41 C42 69.7(3) . . . . ?
C30 C31 C43 C44 -178.83(19) . . . . ?
C41 C31 C43 C44 -55.8(3) . . . . ?
C32 C31 C43 C44 67.1(3) . . . . ?
C34 C33 C45 C46 179.1(2) . . . . ?
C32 C33 C45 C46 67.0(3) . . . . ?
C47A C33 C45 C46 -59.8(3) . . . . ?
C47B C33 C45 C46 -47.9(5) . . . . ?
C34 C33 C47A C48A -52.7(3) . . . . ?
C32 C33 C47A C48A 66.6(3) . . . . ?
C45 C33 C47A C48A -170.8(3) . . . . ?
C34 C33 C47B C48B 73.1(8) . . . . ?
C32 C33 C47B C48B 177.6(7) . . . . ?
C45 C33 C47B C48B -60.7(9) . . . . ?
C36 C37 C49 C50 176.0(2) . . . . ?
C51 C37 C49 C50 52.5(3) . . . . ?
C38 C37 C49 C50 -69.2(3) . . . . ?
C36 C37 C51 C52 -68.4(3) . . . . ?
C49 C37 C51 C52 55.6(3) . . . . ?
C38 C37 C51 C52 -180.0(2) . . . . ?
C40 C39 C53 C54 49.6(3) . . . . ?
C38 C39 C53 C54 -63.0(3) . . . . ?
C55B C39 C53 C54 -175.8(3) . . . . ?
C55A C39 C53 C54 156.5(2) . . . . ?
 
_refine_diff_density_max    1.709
_refine_diff_density_min   -0.334
_refine_diff_density_rms    0.053

_shelx_res_file
;
TITL (Eind)2Si 140925
    shelxl.res
    created by SHELXL-2019/3 at 14:11:21 on 28-Feb-2024
CELL 0.71073 32.7202 18.5940 16.6619 90 104.756 90
ZERR 8 0.0073 0.0039 0.0037 0 0.003 0
LATT 7
SYMM -x, y, 1/2-z
SFAC C H Si
UNIT 448 720 8
OMIT -3 55
L.S. 10
FMAP 2
PLAN 10
TEMP -173
ACTA
BOND
CONF
SIZE 0.28 0.18 0.11
EADP SI1A SI1B
EADP C55A C55B
EADP C56A C56B
DFIX 1.56 0.003 C39 C55B
DFIX 1.53 0.003 C55B C56B
DANG 2.60 0.005 C39 C56B
DANG 2.52 0.005 C38 C55B
OMIT 0 2 0
OMIT -2 0 2
WGHT    0.067800   14.276499
FVAR       0.63420   0.71130   0.74020
PART 1
SI1A  3    0.377702    0.189872    0.346069    21.00000    0.01786    0.02020 =
         0.01646   -0.00077    0.00326   -0.00203
H1    2    0.352403    0.126516    0.354703    21.00000    0.01116
C55A  1    0.400960    0.171527    0.254327    21.00000    0.02338    0.02470 =
         0.02403   -0.00542    0.00693    0.00500
AFIX  13
H55A  2    0.421689    0.210817    0.253293    21.00000   -1.20000
AFIX   0
C56A  1    0.424671    0.099120    0.255305    21.00000    0.03342    0.02806 =
         0.03304   -0.00153    0.00471    0.00592
AFIX 137
H56A  2    0.405687    0.059249    0.259225    21.00000   -1.50000
H56B  2    0.449328    0.097958    0.303208    21.00000   -1.50000
H56C  2    0.433971    0.094429    0.204099    21.00000   -1.50000
AFIX   0
PART 0
PART 2
SI1B  3    0.368334    0.177692    0.358951   -21.00000    0.01786    0.02020 =
         0.01646   -0.00077    0.00326   -0.00203
C55B  1    0.410046    0.161935    0.220897   -21.00000    0.02338    0.02470 =
         0.02403   -0.00542    0.00693    0.00500
AFIX  23
H55C  2    0.427822    0.204724    0.219264   -21.00000   -1.20000
H55D  2    0.411155    0.152363    0.279862   -21.00000   -1.20000
AFIX   0
C56B  1    0.429605    0.097841    0.187104   -21.00000    0.03342    0.02806 =
         0.03304   -0.00153    0.00471    0.00592
AFIX 137
H56D  2    0.415445    0.053523    0.197060   -21.00000   -1.50000
H56E  2    0.459756    0.094864    0.215222   -21.00000   -1.50000
H56F  2    0.426169    0.103992    0.127336   -21.00000   -1.50000
AFIX   0
PART 0
C1    1    0.409207    0.213161    0.456754    11.00000    0.02342    0.01663 =
         0.01702   -0.00014    0.00068    0.00080
C2    1    0.400567    0.178444    0.527477    11.00000    0.01922    0.01582 =
         0.02032   -0.00038    0.00113   -0.00082
C3    1    0.377460    0.106250    0.535113    11.00000    0.02174    0.01843 =
         0.02263    0.00077    0.00351   -0.00308
C4    1    0.389242    0.094007    0.630713    11.00000    0.02732    0.01943 =
         0.02157    0.00207    0.00261   -0.00359
AFIX  23
H4A   2    0.364541    0.074713    0.647795    11.00000   -1.20000
H4B   2    0.412528    0.058625    0.646335    11.00000   -1.20000
AFIX   0
C5    1    0.403128    0.166342    0.675119    11.00000    0.02499    0.01873 =
         0.01895    0.00164    0.00229   -0.00403
C6    1    0.416996    0.207006    0.607917    11.00000    0.02103    0.01853 =
         0.01924    0.00145    0.00338    0.00009
C7    1    0.443147    0.267056    0.620718    11.00000    0.02249    0.01883 =
         0.01755   -0.00168    0.00127   -0.00162
AFIX  43
H7    2    0.453046    0.286810    0.674777    11.00000   -1.20000
AFIX   0
C8    1    0.454672    0.297898    0.553964    11.00000    0.01806    0.01666 =
         0.02009   -0.00008    0.00260   -0.00052
C9    1    0.483263    0.363182    0.557545    11.00000    0.02039    0.01892 =
         0.01882    0.00109    0.00168   -0.00270
C10   1    0.493420    0.360016    0.471969    11.00000    0.02381    0.02357 =
         0.02227    0.00021    0.00438   -0.00506
AFIX  23
H10A  2    0.522995    0.344186    0.478754    11.00000   -1.20000
H10B  2    0.490171    0.408383    0.446282    11.00000   -1.20000
AFIX   0
C11   1    0.462639    0.306115    0.415099    11.00000    0.02105    0.01994 =
         0.01731    0.00073    0.00362   -0.00160
C12   1    0.439226    0.270397    0.474006    11.00000    0.01996    0.01794 =
         0.01752    0.00148    0.00177    0.00226
C13   1    0.394552    0.041539    0.494070    11.00000    0.02871    0.01913 =
         0.02715   -0.00144    0.00456   -0.00178
AFIX  23
H13A  2    0.385156   -0.003457    0.515647    11.00000   -1.20000
H13B  2    0.381431    0.043041    0.433593    11.00000   -1.20000
AFIX   0
C14   1    0.442284    0.038217    0.507552    11.00000    0.03504    0.02579 =
         0.04718   -0.00124    0.01118    0.00143
AFIX  33
H14A  2    0.449739   -0.004213    0.479392    11.00000   -1.20000
H14B  2    0.452061    0.081678    0.484831    11.00000   -1.20000
H14C  2    0.455796    0.035048    0.567116    11.00000   -1.20000
AFIX   0
C15   1    0.328646    0.111238    0.501496    11.00000    0.02449    0.02581 =
         0.02202   -0.00198    0.00158   -0.00492
AFIX  23
H15A  2    0.318324    0.150431    0.531450    11.00000   -1.20000
H15B  2    0.322193    0.125043    0.442207    11.00000   -1.20000
AFIX   0
C16   1    0.303723    0.042793    0.508950    11.00000    0.02731    0.02972 =
         0.03894   -0.00382    0.00605   -0.00829
AFIX  33
H16A  2    0.273470    0.051718    0.486093    11.00000   -1.20000
H16B  2    0.312826    0.003729    0.478005    11.00000   -1.20000
H16C  2    0.308945    0.029193    0.567515    11.00000   -1.20000
AFIX   0
C17   1    0.439773    0.156203    0.753354    11.00000    0.03076    0.02495 =
         0.02185    0.00200   -0.00004   -0.00452
AFIX  23
H17A  2    0.463101    0.130882    0.737282    11.00000   -1.20000
H17B  2    0.450379    0.204254    0.774449    11.00000   -1.20000
AFIX   0
C18   1    0.428635    0.114238    0.824135    11.00000    0.04559    0.03521 =
         0.02435    0.00682    0.00079   -0.00695
AFIX  33
H18A  2    0.453711    0.110503    0.870947    11.00000   -1.20000
H18B  2    0.406162    0.139466    0.841973    11.00000   -1.20000
H18C  2    0.418913    0.065925    0.804721    11.00000   -1.20000
AFIX   0
C19   1    0.364678    0.204217    0.695143    11.00000    0.02698    0.02729 =
         0.02149   -0.00026    0.00703   -0.00453
AFIX  23
H19A  2    0.342300    0.209412    0.642829    11.00000   -1.20000
H19B  2    0.353460    0.172473    0.732212    11.00000   -1.20000
AFIX   0
C20   1    0.373157    0.278143    0.735893    11.00000    0.03204    0.02878 =
         0.02748   -0.00336    0.00994   -0.00427
AFIX  33
H20A  2    0.346960    0.297218    0.745841    11.00000   -1.20000
H20B  2    0.394573    0.273805    0.788819    11.00000   -1.20000
H20C  2    0.383380    0.310852    0.699172    11.00000   -1.20000
AFIX   0
C21   1    0.523547    0.357827    0.628909    11.00000    0.02287    0.02346 =
         0.02102    0.00280    0.00107   -0.00274
AFIX  23
H21A  2    0.515303    0.355424    0.682040    11.00000   -1.20000
H21B  2    0.538227    0.312361    0.622875    11.00000   -1.20000
AFIX   0
C22   1    0.554676    0.420472    0.633347    11.00000    0.02471    0.03031 =
         0.02779    0.00311   -0.00136   -0.00858
AFIX  33
H22A  2    0.579366    0.413050    0.680230    11.00000   -1.20000
H22B  2    0.563739    0.422590    0.581688    11.00000   -1.20000
H22C  2    0.540776    0.465728    0.640955    11.00000   -1.20000
AFIX   0
C23   1    0.458098    0.432980    0.562856    11.00000    0.02541    0.01877 =
         0.02383    0.00068    0.00008   -0.00315
AFIX  23
H23A  2    0.474864    0.474380    0.551696    11.00000   -1.20000
H23B  2    0.431597    0.431680    0.518045    11.00000   -1.20000
AFIX   0
C24   1    0.446688    0.446648    0.644863    11.00000    0.03358    0.02431 =
         0.02308   -0.00198    0.00128    0.00092
AFIX  33
H24A  2    0.430943    0.491870    0.641307    11.00000   -1.20000
H24B  2    0.429195    0.407006    0.656082    11.00000   -1.20000
H24C  2    0.472602    0.449843    0.689841    11.00000   -1.20000
AFIX   0
C25   1    0.489242    0.248947    0.383223    11.00000    0.02511    0.02815 =
         0.03126   -0.00161    0.00784   -0.00014
AFIX  23
H25A  2    0.469824    0.217799    0.342487    11.00000   -1.20000
H25B  2    0.507794    0.273945    0.353630    11.00000   -1.20000
AFIX   0
C26   1    0.516755    0.201097    0.450676    11.00000    0.02858    0.03223 =
         0.05171    0.00925    0.01138    0.00602
AFIX  33
H26A  2    0.532370    0.166773    0.425128    11.00000   -1.20000
H26B  2    0.536766    0.231096    0.490595    11.00000   -1.20000
H26C  2    0.498717    0.174832    0.479428    11.00000   -1.20000
AFIX   0
C27   1    0.432317    0.347596    0.344295    11.00000    0.02283    0.02420 =
         0.01950    0.00352    0.00351   -0.00005
AFIX  23
H27A  2    0.409541    0.314452    0.315827    11.00000   -1.20000
H27B  2    0.419003    0.386701    0.369047    11.00000   -1.20000
AFIX   0
C28   1    0.452225    0.380406    0.279360    11.00000    0.03202    0.02873 =
         0.02073    0.00186    0.00713   -0.00292
AFIX  33
H28A  2    0.430465    0.405449    0.237318    11.00000   -1.20000
H28B  2    0.474244    0.414650    0.306203    11.00000   -1.20000
H28C  2    0.464757    0.342203    0.252836    11.00000   -1.20000
AFIX   0
C29   1    0.340136    0.257498    0.284290    11.00000    0.02166    0.02521 =
         0.01786    0.00200    0.00038   -0.00730
C30   1    0.315533    0.317397    0.296230    11.00000    0.02198    0.02626 =
         0.01695    0.00102    0.00147   -0.00629
C31   1    0.302504    0.340794    0.374354    11.00000    0.02133    0.03313 =
         0.01746    0.00189    0.00401   -0.00234
C32   1    0.269984    0.402784    0.342046    11.00000    0.02395    0.05299 =
         0.02361    0.00372    0.00558    0.00653
AFIX  23
H32A  2    0.241434    0.387469    0.345053    11.00000   -1.20000
H32B  2    0.277978    0.445908    0.377412    11.00000   -1.20000
AFIX   0
C33   1    0.269459    0.421221    0.251401    11.00000    0.03369    0.02103 =
         0.02458   -0.00166    0.01144   -0.00265
C34   1    0.297583    0.363410    0.229695    11.00000    0.02904    0.02058 =
         0.02044   -0.00012    0.00485   -0.00334
C35   1    0.305578    0.354918    0.151699    11.00000    0.03434    0.02283 =
         0.01889    0.00303    0.00620    0.00056
AFIX  43
H35   2    0.294868    0.388639    0.108644    11.00000   -1.20000
AFIX   0
C36   1    0.329375    0.296552    0.138056    11.00000    0.02512    0.02617 =
         0.01669   -0.00028    0.00330   -0.00261
C37   1    0.345481    0.278588    0.062717    11.00000    0.02250    0.02594 =
         0.02002   -0.00097    0.00548    0.00003
C38   1    0.366922    0.203878    0.086337    11.00000    0.04345    0.02996 =
         0.05501    0.00932    0.03164    0.01062
AFIX  23
H38A  2    0.397110    0.206700    0.086142    11.00000   -1.20000
H38B  2    0.353126    0.167479    0.044882    11.00000   -1.20000
AFIX   0
C39   1    0.363057    0.180941    0.174400    11.00000    0.02342    0.02272 =
         0.03358    0.00430   -0.00071   -0.00070
C40   1    0.342819    0.246775    0.201865    11.00000    0.02669    0.02255 =
         0.01858   -0.00064   -0.00046   -0.00666
C41   1    0.282395    0.278481    0.411424    11.00000    0.03082    0.04422 =
         0.02379    0.00193    0.00791   -0.01079
AFIX  23
H41A  2    0.305229    0.245919    0.441003    11.00000   -1.20000
H41B  2    0.268705    0.298498    0.453111    11.00000   -1.20000
AFIX   0
C42   1    0.249604    0.233811    0.349133    11.00000    0.03915    0.05739 =
         0.03323   -0.00232    0.01105   -0.02411
AFIX  33
H42A  2    0.238714    0.195690    0.378643    11.00000   -1.20000
H42B  2    0.226259    0.264956    0.320541    11.00000   -1.20000
H42C  2    0.262880    0.212237    0.308400    11.00000   -1.20000
AFIX   0
C43   1    0.340843    0.368965    0.441324    11.00000    0.02031    0.02945 =
         0.02060   -0.00427    0.00286    0.00059
AFIX  23
H43A  2    0.362607    0.330737    0.453702    11.00000   -1.20000
H43B  2    0.353027    0.410400    0.418146    11.00000   -1.20000
AFIX   0
C44   1    0.331443    0.392455    0.522931    11.00000    0.03092    0.04310 =
         0.02405   -0.00701    0.00445    0.00189
AFIX  33
H44A  2    0.357543    0.409417    0.561374    11.00000   -1.20000
H44B  2    0.310586    0.431415    0.511989    11.00000   -1.20000
H44C  2    0.320189    0.351560    0.547631    11.00000   -1.20000
AFIX   0
C45   1    0.224335    0.412995    0.194026    11.00000    0.04682    0.03806 =
         0.02639    0.00176    0.00093    0.01884
AFIX  23
H45A  2    0.226000    0.417632    0.135752    11.00000   -1.20000
H45B  2    0.214167    0.363814    0.200995    11.00000   -1.20000
AFIX   0
C46   1    0.191606    0.466693    0.208605    11.00000    0.05107    0.04518 =
         0.03892    0.00935    0.01361    0.02344
AFIX  33
H46A  2    0.164258    0.457090    0.169483    11.00000   -1.20000
H46B  2    0.188854    0.461732    0.265551    11.00000   -1.20000
H46C  2    0.200718    0.515694    0.200132    11.00000   -1.20000
AFIX   0
EADP C47A C47B
EADP C48A C48B
SADI 0.002 C33 C47A C33 C47B
SADI 0.002 C47A C48A C47B C48B
SADI 0.002 C33 C48A C33 C48B
PART 3
C47A  1    0.282862    0.498884    0.233773    31.00000    0.03224    0.02093 =
         0.02674    0.00155    0.00848    0.00008
AFIX  23
H47A  2    0.277237    0.505658    0.173001    31.00000   -1.20000
H47B  2    0.265168    0.533761    0.254699    31.00000   -1.20000
AFIX   0
C48A  1    0.329205    0.515371    0.273365    31.00000    0.03997    0.02874 =
         0.04269    0.00114    0.00877   -0.00661
AFIX 137
H48A  2    0.334735    0.511499    0.333841    31.00000   -1.50000
H48B  2    0.335700    0.564274    0.258474    31.00000   -1.50000
H48C  2    0.347004    0.480951    0.253260    31.00000   -1.50000
AFIX   0
PART 0
PART 4
C47B  1    0.297725    0.489375    0.275518   -31.00000    0.03224    0.02093 =
         0.02674    0.00155    0.00848    0.00008
AFIX  23
H47C  2    0.283074    0.523898    0.303857   -31.00000   -1.20000
H47D  2    0.324459    0.475269    0.315444   -31.00000   -1.20000
AFIX   0
C48B  1    0.308110    0.526828    0.201904   -31.00000    0.03997    0.02874 =
         0.04269    0.00114    0.00877   -0.00661
AFIX 137
H48D  2    0.326399    0.495761    0.178629   -31.00000   -1.50000
H48E  2    0.322712    0.572235    0.220292   -31.00000   -1.50000
H48F  2    0.281906    0.536599    0.159399   -31.00000   -1.50000
AFIX   0
PART 0
C49   1    0.309290    0.276438   -0.016900    11.00000    0.03251    0.04337 =
         0.01770   -0.00442    0.00441   -0.00669
AFIX  23
H49A  2    0.289408    0.237807   -0.011153    11.00000   -1.20000
H49B  2    0.293738    0.322568   -0.021864    11.00000   -1.20000
AFIX   0
C50   1    0.322683    0.263893   -0.096805    11.00000    0.05995    0.05881 =
         0.02203   -0.01125    0.01346   -0.01699
AFIX  33
H50A  2    0.297624    0.263384   -0.143900    11.00000   -1.20000
H50B  2    0.341695    0.302591   -0.104352    11.00000   -1.20000
H50C  2    0.337355    0.217625   -0.093615    11.00000   -1.20000
AFIX   0
C51   1    0.379847    0.332896    0.053534    11.00000    0.02990    0.03847 =
         0.02586    0.00118    0.00787   -0.00699
AFIX  23
H51A  2    0.401909    0.334087    0.106680    11.00000   -1.20000
H51B  2    0.393243    0.314247    0.010736    11.00000   -1.20000
AFIX   0
C52   1    0.365773    0.409993    0.030502    11.00000    0.06476    0.03126 =
         0.03900   -0.00574    0.02531   -0.01406
AFIX  33
H52A  2    0.390229    0.438916    0.026590    11.00000   -1.20000
H52B  2    0.344671    0.410351   -0.023104    11.00000   -1.20000
H52C  2    0.353371    0.430269    0.073216    11.00000   -1.20000
AFIX   0
C53   1    0.334271    0.113705    0.167290    11.00000    0.03395    0.02639 =
         0.02269   -0.00204    0.00156   -0.00720
AFIX  23
H53A  2    0.346860    0.074550    0.141190    11.00000   -1.20000
H53B  2    0.334377    0.097779    0.224040    11.00000   -1.20000
AFIX   0
C54   1    0.288620    0.123520    0.118205    11.00000    0.02863    0.03012 =
         0.05411   -0.01173    0.01138   -0.00603
AFIX 137
H54A  2    0.276203    0.164360    0.140739    11.00000   -1.50000
H54B  2    0.272560    0.079804    0.122389    11.00000   -1.50000
H54C  2    0.287668    0.132724    0.059844    11.00000   -1.50000
AFIX   0
HKLF 4


REM  (Eind)2Si 140925
REM wR2 = 0.1823, GooF = S = 1.098, Restrained GooF = 1.110 for all data
REM R1 = 0.0757 for 8955 Fo > 4sig(Fo) and 0.0969 for all 11249 data
REM 540 parameters refined using 7 restraints

END

WGHT      0.0678     14.2666

REM Highest difference peak  1.709,  deepest hole -0.334,  1-sigma level  0.053
Q1    1   0.4179  0.0879  0.3380  11.00000  0.05    1.71
Q2    1   0.4144  0.1651  0.1938  11.00000  0.05    0.69
Q3    1   0.2400  0.4375  0.1876  11.00000  0.05    0.35
Q4    1   0.2624  0.1963  0.3403  11.00000  0.05    0.30
Q5    1   0.3192  0.1041  0.3315  11.00000  0.05    0.28
Q6    1   0.3993  0.1321  0.6580  11.00000  0.05    0.28
Q7    1   0.3998  0.2089  0.4140  11.00000  0.05    0.27
Q8    1   0.3537  0.2007  0.1775  11.00000  0.05    0.27
Q9    1   0.2683  0.3635  0.3379  11.00000  0.05    0.27
Q10   1   0.4458  0.2861  0.4407  11.00000  0.05    0.26
;
_shelx_res_checksum   53818

_shelx_hkl_file
;
   0   0  -2   26.58   20.25
   0   0   2  -14.50   11.81
   0   0   2   50.67   23.47
   0   0  -2  -14.77   11.75
   0   0  -3   45.61   31.28
   0   0   3   55.35   33.93
   0   0   3   80.54   40.75
   0   0  -3   45.29   17.90
   0   0  -4 4198.18  140.41
   0   0   4 4069.79  101.61
   0   0   4 4226.56  107.48
   0   0  -4 3948.50   97.47
   0   0  -5   74.59   43.10
   0   0   5   37.93   22.41
   0   0   5   33.16   31.52
   0   0  -5   92.92   32.27
   0   0   613320.60   91.71
   0   0   613688.91  120.69
   0   0  -612378.30  243.86
   0   0  -7    3.54   33.33
   0   0   7   26.42   28.73
   0   0   7   67.27   37.84
   0   0  -7   29.59   22.41
   0   0  -8 5646.79  149.45
   0   0   8 5451.70  143.28
   0   0  -9   19.08   39.03
   0   0   9  -23.08   36.07
   0   0 -10 9564.76  327.82
   0   0  10 9726.22  266.88
   0   0 -11  -41.60   42.84
   0   0  11  -38.46   43.86
   0   0 -12  234.90   59.73
   0   0  12  196.08   69.26
   0   0 -13   -2.50   29.01
   0   0  13   33.38   49.87
   0   0 -14  721.89  180.84
   0   0  14  687.77  134.05
   0   0 -15   24.27   34.93
   0   0  15   13.06   29.18
   0   0 -16  -75.76   54.38
   0   0  16   22.47   27.78
   0   0 -17   53.68   32.89
   0   0  17    1.12   31.75
   0   0 -18  131.46   49.51
   0   0  18   21.98   36.50
   0   0 -19   10.67   35.08
   0   0  19   79.37   64.61
   0   0 -20  279.32  194.27
   0   0  20  391.64  144.87
   0   0 -21   72.86   32.02
   0   0  21   26.13   35.39
   0   0 -22  223.55  131.06
   0   0  22  241.64  102.35
   0   0  23   48.93   21.58
   0   2   0   -5.19    6.38
   0  -2   0   -1.30    3.94
   0   2   2 1345.90  103.93
   0   2   2 1374.49   58.31
   0   2  -2 1293.61   50.01
   0   2  -2 1193.34   31.92
   0  -2   2 1207.80   80.18
   0  -2  -2 1333.43   52.65
   0  -2  -2 1401.38   55.20
   0   2  -3 4508.79  107.49
   0   2   3 4684.30  110.86
   0   2  -3 4303.32  107.94
   0   2   3 4871.08  119.66
   0  -2   3 4548.61  135.40
   0  -2   3 4284.15  115.75
   0  -2  -3 4719.78  116.37
   0  -2  -3 4568.92  150.42
   0   2  -424700.19  163.50
   0  -2  -426532.69  171.99
   0   2   5 3397.46   97.12
   0   2  -5 3352.51   89.96
   0   2   5 3341.01   89.95
   0  -2   5 3469.64  110.60
   0  -2   5 3042.33   97.16
   0  -2  -5 3435.12   97.74
   0  -2  -5 3438.86   91.10
   0   2   6 3926.97  106.67
   0   2  -6 4128.78  168.09
   0   2   6 3982.56  102.75
   0  -2   6 4093.52  114.03
   0  -2   6 3609.16  101.71
   0  -2  -6 3931.84  106.38
   0  -2  -6 3711.90   95.72
   0  -2   6 3983.75  105.70
   0   2   7 1128.50  125.03
   0   2  -7  923.81   63.34
   0  -2  -7  890.74   51.66
   0  -2   7  853.03   45.53
   0  -2   7  854.32   35.34
   0  -2  -7  907.59   67.02
   0  -2   7  939.30   92.46
   0   2  -8 1933.58   83.10
   0   2   8 1843.00   59.55
   0  -2   8 1896.26   63.41
   0   2   9  -22.85   35.32
   0   2  -9   -7.85   35.37
   0  -2  -9   73.54   46.50
   0  -2   9   17.04   10.39
   0   2  10  422.40  105.02
   0   2 -10  220.96   73.11
   0  -2 -10  440.83   99.17
   0  -2  10  375.51   98.00
   0   2  11 1408.72  101.34
   0   2 -11 1415.57   63.90
   0  -2 -11 1196.20  194.30
   0  -2  11 1456.84  117.11
   0   2  12 1052.51  241.24
   0   2 -12  984.66  110.18
   0  -2 -12  866.38   79.04
   0  -2  12  997.88   69.65
   0   2  13  505.51  114.84
   0   2 -13  412.21  108.61
   0  -2 -13  369.09   96.59
   0  -2  13  466.54  103.02
   0   2  14  471.86  118.48
   0   2 -14  469.77  133.21
   0  -2 -14  533.21  132.98
   0  -2  14  579.70  156.91
   0   2  15   49.01   38.27
   0   2 -15   41.85   37.54
   0  -2 -15   66.25   42.71
   0  -2  15   77.10   44.07
   0   2  16  810.30  178.21
   0   2 -16  697.23  174.62
   0  -2 -16  865.60  149.18
   0  -2  16  670.92  149.96
   0   2  17    2.38   34.89
   0   2 -17  -56.42   54.49
   0  -2 -17   93.36   53.83
   0  -2  17   53.07   46.30
   0   2  18  131.04   68.66
   0   2 -18  167.90   67.62
   0  -2 -18   63.58   40.65
   0  -2  18  -10.35   51.16
   0   2  19   42.94   41.43
   0   2 -19   87.51   47.34
   0  -2 -19   51.32   27.23
   0  -2  19   64.54   33.05
   0   2  20  110.72   60.06
   0   2 -20  179.63   68.57
   0  -2 -20   82.39   45.42
   0  -2  20  136.58   47.99
   0   2  21  232.75   81.97
   0   2 -21  222.08   78.29
   0  -2 -21  129.08   67.43
   0  -2  21  144.95   45.24
   0   2  22  102.81   61.48
   0   2 -22  189.22   59.48
   0  -2 -22   60.84   49.50
   0  -2  22   53.71   45.91
   0   4   0 9854.51  188.69
   0   4   010523.13  207.63
   0  -4   0 9623.67  182.60
   0  -4   010020.90  195.46
   0   4   1   29.35   12.47
   0   4  -1    7.80   10.28
   0   4  -1   37.13   30.82
   0   4   1   39.67   19.87
   0   4   1   15.29   21.20
   0  -4   1  -33.71   26.42
   0  -4   1    9.21    7.72
   0  -4  -1   18.33   24.09
   0   4  -2  809.51   48.70
   0   4   2  755.09   72.03
   0   4  -2  853.88   47.59
   0   4   2  852.50   50.67
   0  -4   2  759.08   25.72
   0  -4   2  715.47   35.19
   0  -4  -2  773.77   31.80
   0  -4  -2  722.83   39.14
   0   4   3  646.40   38.63
   0   4  -3  666.35   50.08
   0   4  -3  667.82   39.43
   0  -4   3  582.96   18.85
   0  -4   3  593.33  104.15
   0  -4  -3  603.17   36.87
   0  -4  -3  613.10   61.31
   0   4  -4  541.39   40.49
   0   4   4  590.58   37.20
   0   4  -4  522.72  121.46
   0   4   4  714.00  146.04
   0  -4   4  515.30   27.22
   0  -4   4  479.64  105.72
   0  -4  -4  591.30  149.31
   0  -4  -4  587.85   44.30
   0   4  -5   42.71   20.49
   0   4   5   11.37   15.07
   0   4  -5   -9.77   36.65
   0   4   5    9.20   18.77
   0  -4   5    9.60    9.22
   0  -4   5   23.71   18.94
   0  -4  -5   34.00   38.14
   0  -4  -5   28.40   15.72
   0   4   6 5005.74  137.77
   0   4  -6 5251.37  133.70
   0   4  -6 4922.67  154.33
   0   4   6 5048.63  134.09
   0  -4   6 5181.81  126.44
   0  -4   6 5139.93  136.81
   0  -4  -6 4966.94  132.31
   0  -4  -6 5100.27  136.46
   0   4   7  274.90   61.81
   0   4  -7  231.74   74.56
   0   4  -7  281.68   72.46
   0  -4  -7  108.64   47.82
   0  -4   7  233.08   55.02
   0   4   8   46.97   26.86
   0   4  -8   58.02   33.22
   0  -4  -8   -9.74   42.84
   0   4   9 1170.76   89.91
   0   4  -9  927.77  124.15
   0  -4  -9 1103.12   70.80
   0  -4   9 1040.59  107.67
   0   4  10 9752.17  269.56
   0   4 -10 9522.11  262.64
   0  -4 -10 9850.40  327.61
   0  -4  10 9629.57  267.11
   0   4  11  501.02   96.19
   0   4 -11  406.46  109.93
   0  -4 -11  414.94   92.21
   0  -4  11  324.59   62.06
   0   4  12  129.76   63.83
   0   4 -12   82.15   69.94
   0  -4 -12   95.00   44.29
   0  -4  12  101.80   65.46
   0   4  13   46.45   45.90
   0   4 -13   60.39   54.94
   0  -4 -13  138.29   50.69
   0  -4  13   43.29   39.53
   0   4  14  440.64  110.13
   0   4 -14  505.20  132.54
   0  -4 -14  607.28  148.35
   0  -4  14  445.33  146.37
   0   4  15  112.92   49.11
   0   4 -15  -98.71   50.25
   0  -4 -15  -35.69   64.98
   0  -4  15   30.81   46.34
   0   4  16  311.41   60.97
   0   4 -16  254.28   76.36
   0  -4 -16  344.41  130.64
   0  -4  16  318.61   60.92
   0   4  17  376.97  111.58
   0   4 -17  377.18   93.41
   0  -4 -17  439.12  126.00
   0  -4  17  439.75  101.39
   0   4  18   41.29   48.95
   0   4 -18   39.83   34.40
   0  -4 -18   31.40   47.56
   0  -4  18  105.14   57.60
   0   4 -19   54.27   31.68
   0  -4 -19   83.90   66.03
   0  -4  19  122.08   60.67
   0   4  20  159.35  102.17
   0   4 -20  125.22   50.22
   0  -4 -20  151.64   50.16
   0  -4  20  176.22   92.40
   0   4  21   85.99   32.93
   0   4 -21   63.96   35.80
   0  -4 -21   85.71   58.29
   0  -4  21  144.41   59.56
   0   4 -22  -18.85   45.06
   0   4  22  -30.59   62.06
   0  -4  22    7.01   24.05
   0  -4  23   16.48   30.95
   0   6   0 2588.44   63.27
   0   6   0 2823.44   88.01
   0  -6   0 2581.31   83.96
   0   6   110960.22  210.28
   0   6  -111213.89  214.71
   0   6  -111323.85  225.29
   0   6   111137.38  215.06
   0   6   111590.48  245.11
   0  -6   110750.35  213.76
   0  -6   110538.67  199.73
   0  -6  -110922.21  217.06
   0   6   2 2296.90   97.40
   0   6  -2 2482.48   86.26
   0   6   2 2319.10   95.77
   0   6   2 2256.02   88.92
   0  -6   2 2384.18   95.20
   0  -6   2 2368.31   69.20
   0   6  -3    3.21    8.77
   0   6   3   21.66   20.23
   0   6  -3   -5.17   35.58
   0   6   3  -37.01   41.67
   0  -6   3  -14.48   11.40
   0  -6   3   -2.17   28.79
   0  -6  -3   13.63   16.51
   0  -6  -3   14.42    8.37
   0   6  -4  377.63   33.30
   0   6   4  321.65   90.07
   0   6  -4  350.43   75.25
   0   6   4  349.38  106.52
   0  -6   4  358.74   46.56
   0  -6   4  299.65   71.94
   0  -6  -4  342.24   89.52
   0  -6  -4  324.83   67.01
   0   6  -5   87.20   39.17
   0   6   5   79.34   35.03
   0   6  -5   72.89   44.89
   0   6   5   66.52   41.65
   0  -6   5   89.08   22.90
   0  -6   5   71.98   27.90
   0  -6  -5   86.03   54.38
   0   6   6   40.89   25.30
   0   6  -6   33.58   26.39
   0   6  -6   14.22   37.96
   0  -6  -6   46.61   21.81
   0  -6   6   -4.41   11.73
   0   6   7 1949.85   78.55
   0   6  -7 1727.96   64.13
   0   6  -7 1529.17  155.26
   0  -6  -7 1595.61   67.99
   0  -6   7 1793.33   78.89
   0   6   8  605.47  156.57
   0   6  -8  621.63  109.89
   0   6  -8  595.86  158.32
   0  -6  -8  492.35  127.74
   0  -6   8  599.47   44.12
   0   6  -9 5485.66  180.18
   0   6  -9 5840.68  170.10
   0   6   9 5824.65  174.59
   0  -6  -9 5632.89  167.73
   0   6 -10 2630.69  154.76
   0   6 -10 2748.69   64.15
   0   6  10 3012.14  145.99
   0  -6 -10 2814.35   87.60
   0   6  11 3364.87  106.02
   0   6 -11 3137.55   81.10
   0  -6 -11 3052.78  203.76
   0  -6  11 3286.49  218.59
   0   6  12  294.11  111.67
   0   6 -12  245.60   70.59
   0  -6 -12  380.99  110.03
   0  -6  12  202.79   63.41
   0   6  13   47.48   43.42
   0   6 -13   24.01   38.66
   0  -6 -13   89.88   49.36
   0  -6  13   26.29   38.03
   0   6  14   66.06   52.07
   0   6 -14   32.88   25.97
   0  -6 -14   18.67   64.68
   0  -6  14  102.93   31.81
   0   6  15   26.37   39.50
   0   6 -15  108.34   39.64
   0  -6 -15   16.59   60.23
   0  -6  15   62.00   29.58
   0   6  16   71.43   57.25
   0   6 -16   98.26   53.64
   0  -6 -16   15.02   36.45
   0  -6  16   58.40   41.64
   0   6  17 1216.32   93.51
   0   6 -17 1032.87  238.93
   0  -6 -17 1087.05  254.54
   0  -6  17  966.90  204.42
   0   6  18   94.38   45.37
   0   6 -18  169.93   51.92
   0  -6 -18   43.43   31.24
   0  -6  18   31.57   48.21
   0   6  19   -8.74   56.04
   0   6 -19  -17.31   45.57
   0  -6 -19   43.54   36.07
   0  -6  19  -10.43   39.71
   0   6  20   43.17   29.25
   0   6 -20  116.45   31.95
   0  -6 -20   35.18   28.45
   0  -6  20   81.09   43.11
   0   6  21  -74.67   57.88
   0   6 -21  -10.52   43.20
   0  -6 -21  -61.15   60.87
   0  -6  21   12.47   35.34
   0   6 -22   47.47   41.19
   0   6  22  111.72   69.88
   0  -6  22   77.03   49.24
   0   8   0  484.99   22.36
   0   8   0  480.63   56.20
   0   8   0  628.59  140.66
   0  -8   0  499.88   81.27
   0   8   1 1407.71   38.35
   0   8  -1 1523.70   48.27
   0   8   1 1493.90   53.48
   0   8   1 1554.13  139.24
   0   8  -1 1696.36   61.14
   0  -8   1 1354.10   47.16
   0  -8   1 1449.92  129.54
   0   8   2 1204.70   43.17
   0   8  -2 1455.82   39.39
   0   8  -2 1394.06   55.68
   0   8   2 1225.26   43.89
   0   8   2 1307.49   66.82
   0  -8   2 1239.79   34.61
   0   8   3  179.81   52.90
   0   8  -3  186.56   40.26
   0   8  -3  176.37   62.20
   0   8   3   98.13   36.74
   0   8   3  243.93   56.95
   0  -8   3  175.53   42.46
   0   8   4 1427.99   48.34
   0   8  -4 1469.52   38.89
   0   8   4 1615.13  175.42
   0   8  -4 1533.37   70.73
   0  -8   4 1455.16   42.20
   0   8   5  936.24   85.24
   0   8   5  724.97   65.28
   0   8  -5  846.30   33.58
   0   8  -5  902.05   67.02
   0  -8   5  817.47   40.60
   0  -8  -5  851.79   89.89
   0   8   6  642.12  150.51
   0   8  -6  726.41   68.45
   0   8  -6  632.70  112.53
   0  -8  -6  664.07   33.69
   0  -8   6  668.89   58.90
   0   8   7  355.10   62.79
   0   8  -7  308.62   81.55
   0   8  -7  256.35   80.18
   0  -8  -7  279.91   57.11
   0  -8   7  248.55   60.69
   0   8   8  538.43  156.77
   0   8  -8  546.89   57.78
   0   8  -8  421.02   91.27
   0  -8  -8  685.00  145.62
   0  -8   8  503.61   46.70
   0   8  -9 1330.97   50.12
   0   8  -9 1614.26   49.39
   0   8   9 2037.61  238.48
   0  -8  -9 1577.80   63.06
   0   8 -10  829.55   53.94
   0   8 -10  853.73   79.78
   0   8  10 1137.43  210.02
   0  -8 -10  868.15  208.64
   0   8 -11  226.35   53.73
   0   8 -11  195.51   46.86
   0   8  11  246.11   57.40
   0  -8 -11  183.15   51.93
   0   8  12  703.13   74.07
   0   8 -12  673.34   67.96
   0  -8 -12  688.23  179.71
   0   8  13  462.69  110.68
   0   8 -13  332.26   77.62
   0  -8 -13  416.38   99.95
   0  -8  13  481.85   71.60
   0   8  14  200.56   71.26
   0   8 -14  246.78   80.96
   0  -8 -14  143.60   48.86
   0  -8  14  134.59   48.58
   0   8  15   10.45   19.90
   0   8 -15   82.63   33.43
   0  -8 -15   30.69   52.43
   0  -8  15   43.94   22.86
   0   8  16  167.77   68.69
   0   8 -16  173.87   37.95
   0  -8 -16  173.69   52.82
   0  -8  16   35.24   63.83
   0   8  17  332.79   99.21
   0   8 -17  266.41   61.71
   0  -8 -17  316.36   45.78
   0  -8  17  321.05   84.00
   0   8  18 1122.94  121.12
   0   8 -18 1055.76   71.71
   0  -8 -18  855.55  272.50
   0  -8  18 1044.10  124.61
   0   8  19  142.51   64.81
   0   8 -19  102.52   47.39
   0  -8 -19  180.83   48.95
   0  -8  19  217.44   89.46
   0   8  20 1096.17  139.68
   0   8 -20 1017.51  228.06
   0  -8 -20  881.42  307.12
   0  -8  20 1076.16  137.89
   0   8 -21  137.35   71.04
   0   8  21  129.76   44.11
   0  -8  21  116.48   47.93
   0   8 -22   57.06   28.26
   0  -8  22  -12.53   40.21
   0  10   0 3512.70   96.41
   0  10   0 3680.86   95.65
   0  10   0 3795.98  130.77
   0  10  -1   35.79   12.60
   0  10   1   22.48   17.38
   0  10  -1    3.56    7.72
   0  10   1    6.81   15.89
   0  10  -1   45.72   27.74
   0  10   1   75.68   45.54
   0  10   2   14.85   10.26
   0  10  -2   16.89    8.47
   0  10   2   13.68   15.14
   0  10   2   82.53   55.54
   0  10  -2   68.73   43.82
   0 -10   2   22.40   13.81
   0  10   3    4.26    7.72
   0  10  -3    9.78    9.48
   0  10  -3  -11.28   44.22
   0  10   3   54.95   33.60
   0  10   3   53.93   37.47
   0 -10   3   -9.49    9.02
   0  10   4  165.59   36.88
   0  10  -4  176.12   35.25
   0  10  -4  125.32   68.16
   0  10   4  180.06   68.54
   0  10   4  270.78   76.19
   0 -10   4  138.98   20.75
   0  10  -5  126.33   25.04
   0  10  -5  154.05   52.93
   0  10   5  172.78   48.45
   0  10   5  104.61   47.09
   0 -10   5  107.84   21.44
   0  10  -6   12.05    8.31
   0  10  -6   -9.67   42.85
   0  10   6   53.63   29.16
   0  10   6   62.54   48.46
   0 -10   6    3.92    9.55
   0  10   7  112.18   74.96
   0  10  -7  128.35   30.41
   0  10  -7   72.52   49.45
   0 -10  -7  139.60   38.86
   0 -10   7   63.02   21.32
   0  10   8 1549.83   88.29
   0  10  -8 1392.36   37.13
   0  10  -8 1223.38   50.92
   0 -10  -8 1359.59   58.29
   0 -10   8 1271.14   38.96
   0  10  -9   26.89   22.82
   0  10  -9   45.02   18.27
   0  10   9   73.59   28.78
   0 -10  -9   71.62   46.63
   0  10 -10  162.15   58.03
   0  10 -10  245.43   77.19
   0  10  10  286.98   75.60
   0 -10 -10  226.82   82.16
   0  10 -11  811.35  152.51
   0  10 -11  766.10   84.72
   0  10  11  796.96  170.75
   0 -10 -11  777.08  200.25
   0  10 -12   28.59   45.95
   0  10 -12   69.20   20.79
   0  10  12   88.76   73.91
   0 -10 -12   96.10   33.24
   0  10 -13  375.85   97.68
   0  10 -13  378.31   94.76
   0  10  13  401.18  118.68
   0 -10 -13  332.76   75.37
   0  10  14  594.18  152.70
   0  10 -14  478.89  122.98
   0 -10 -14  488.15  148.09
   0 -10  14  479.55  121.67
   0  10  15 1358.51   97.03
   0  10 -15 1184.33  112.88
   0 -10 -15 1131.03  115.14
   0 -10  15 1378.56   95.46
   0  10  16  430.25   74.43
   0  10 -16  423.27  100.71
   0 -10 -16  363.29   83.38
   0 -10  16  324.10  121.18
   0  10  17   71.34   48.12
   0  10 -17   97.93   31.38
   0 -10 -17   81.03   58.22
   0 -10  17   70.28   49.79
   0  10  18  176.54   86.18
   0 -10 -18  129.24   52.51
   0 -10  18  105.35   50.16
   0  10 -19   43.59   29.21
   0  10  19   -3.85   61.93
   0 -10  19   51.66   38.81
   0  10 -20   53.32   33.71
   0  10  20    8.15   44.23
   0  10  20   88.75   51.66
   0 -10  20   34.78   71.55
   0  10  21  110.93   62.50
   0 -10  21   20.56   16.52
   0  12   0  441.36   22.23
   0  12   0  457.37   46.34
   0  12   0  442.94  106.78
   0  12  -1  355.10   31.02
   0  12   1  320.50   29.06
   0  12  -1  390.67   50.19
   0  12   1  325.05   39.75
   0  12  -1  486.49  181.65
   0  12   1  378.04   79.27
   0  12  -2 8007.08  208.76
   0  12   2 8233.26  219.14
   0  12  -2 9034.26  235.97
   0  12   2 8448.73  228.61
   0  12  -2 8480.43  238.48
   0  12   2 8394.35  243.01
   0  12   3  815.27   31.83
   0  12   3  758.89   67.03
   0  12   3  868.39   75.15
   0  12  -3  948.89  182.82
   0 -12   3  750.05   40.08
   0  12  -4  102.46   16.22
   0  12  -4  104.07   51.57
   0  12   4   62.39   36.88
   0  12   4   61.91   45.42
   0 -12   4   62.02   13.77
   0  12  -5  107.34   19.08
   0  12  -5   91.94   27.50
   0  12   5  177.39   50.29
   0  12   5   96.78   51.08
   0 -12   5   97.42   20.18
   0  12  -6   11.38    8.99
   0  12  -6   -9.43   41.37
   0  12   6   33.18   24.89
   0  12   6   46.23   28.55
   0 -12   6    8.72    6.30
   0  12  -7  205.66   40.60
   0  12  -7  120.08   50.49
   0  12   7  181.23   36.18
   0  12   7  170.52   79.46
   0 -12   7  125.82   27.60
   0  12  -8  343.74   67.97
   0  12  -8  413.52   85.50
   0  12   8  369.57   94.13
   0  12   8  177.50  112.84
   0 -12   8  237.32   60.08
   0  12  -9  647.63   88.09
   0  12   9  697.02  156.23
   0  12  -9  638.80  148.55
   0  12   9  675.08  150.32
   0  12 -10  418.93   40.90
   0  12  10  400.59  131.88
   0  12 -10  363.86  117.68
   0  12  10  403.40  102.17
   0  12 -11 2612.04  100.65
   0  12  11 2745.74  193.34
   0  12 -11 2639.49  204.09
   0  12  11 2997.46  225.09
   0  12 -12   89.22   32.43
   0  12  12  114.15   45.06
   0  12 -12  112.18   27.99
   0  12  12  153.43   86.05
   0  12 -13  480.05  112.41
   0  12  13  573.23  194.81
   0  12 -13  649.66  148.41
   0  12  13  476.96  115.40
   0  12 -14  387.18  125.75
   0  12  14  461.06  136.15
   0  12 -14  343.42   76.73
   0  12  14  522.18  130.91
   0  12 -15  167.19   56.07
   0  12  15  255.98   89.21
   0  12  15  134.03   57.52
   0 -12  15  156.49   62.97
   0  12 -16    6.35   17.34
   0  12  16   83.70   47.92
   0  12  16   20.01   35.82
   0 -12  16   36.71   53.29
   0  12  17  180.82   44.58
   0  12  17  100.49   63.11
   0 -12  17   89.29   98.14
   0  12  18  944.74  139.86
   0  12  18  854.60   96.31
   0 -12  18  796.28  102.04
   0  12  19   49.10   39.13
   0  12  19   67.34   58.65
   0 -12  19  -15.62   50.28
   0 -12  20  121.78   45.69
   0  14   0  325.96   41.09
   0  14   0  312.50   53.29
   0  14   0  273.94   95.91
   0  14  -1  453.36   29.57
   0  14   1  461.88   44.69
   0  14  -1  427.68   49.57
   0  14   1  516.12   69.30
   0  14  -1  501.26  133.32
   0  14   1  601.23  150.04
   0  14  -2  144.39   26.46
   0  14   2  158.68   40.06
   0  14   2  123.18   36.29
   0  14  -2   65.11   26.41
   0  14   2  142.14   51.19
   0  14  -3 1400.62   15.03
   0  14   3 1426.38   67.37
   0  14   3 1485.24   52.35
   0  14  -3 1627.18   65.21
   0  14   3 1673.59   84.68
   0  14   4  252.60   46.63
   0  14   4  261.44   62.28
   0  14  -4  305.67   89.04
   0 -14   4  175.08   20.65
   0  14  -5   42.15   31.04
   0  14   5  -11.43   22.35
   0  14   5   32.57   33.13
   0 -14   5   20.65    8.85
   0  14  -6 6118.86  123.59
   0  14  -6 6342.46  214.16
   0  14   6 6062.85  175.45
   0  14   6 6439.60  163.39
   0 -14   6 5464.51  109.64
   0  14  -7 1588.58   71.34
   0  14   7 1556.86  115.05
   0  14  -7 1591.43   69.47
   0  14   7 1753.49  122.21
   0  14  -8   -2.87   12.77
   0  14   8   45.27   19.22
   0  14  -8   60.06   24.56
   0  14   8   -2.37   66.97
   0  14  -9  781.60   59.21
   0  14   9  928.76  146.04
   0  14  -9  841.97   75.15
   0  14   9  949.50  318.72
   0  14 -10 2024.67   44.36
   0  14  10 2026.92   64.49
   0  14 -10 1888.93  160.39
   0  14  10 2177.55  135.19
   0  14 -11 1116.41   41.02
   0  14  11 1054.61   56.91
   0  14 -11 1214.15  245.82
   0  14  11 1394.58  347.94
   0  14  12   82.97   48.12
   0  14 -12  156.32   81.94
   0  14  12  171.36   67.80
   0  14  13   14.50   38.74
   0  14 -13  145.31   66.96
   0  14  13  -49.05   60.72
   0  14  14   97.76   70.86
   0  14 -14   51.01   36.74
   0  14  14   80.84   51.02
   0  14  15   58.81   43.48
   0  14 -15   38.14   47.96
   0  14  15    7.83   33.28
   0  14  16   97.47   38.58
   0  14  16  102.34   48.79
   0 -14  16   64.53   68.60
   0  14  17   99.34   77.90
   0  14  17  139.92   86.48
   0 -14  17   64.99   61.72
   0  14  18   -4.74   37.05
   0  14  18   30.32   28.53
   0 -14  18   34.64   20.78
   0  14  19   -8.20   52.63
   0 -14  19   43.90   16.34
   0  16   0   32.84   11.01
   0  16   0  118.33   52.21
   0  16   1  558.34   73.08
   0  16  -1  588.04  181.45
   0  16   1  646.32  197.12
   0  16   2  478.64   91.08
   0  16  -2  545.32  103.28
   0  16   2  617.77  160.60
   0  16   3  918.87  102.42
   0  16  -3  779.64   74.23
   0  16   3  960.42  252.43
   0  16   4  730.11   84.64
   0  16  -4  703.76  194.53
   0  16   4  892.16  204.08
   0  16   5 1137.96   95.10
   0  16  -5 1312.39   77.50
   0  16   5 1173.90  354.51
   0  16   6   13.42   29.63
   0  16  -6   -3.41   41.84
   0  16   6   58.78   44.79
   0  16   7 1572.26  152.96
   0  16  -7 1478.64  167.81
   0  16   7 1735.04  135.98
   0  16   8  678.43   72.29
   0  16  -8  532.64  103.71
   0  16   8  649.57  271.34
   0  16   9  237.31   67.96
   0  16  -9  282.51   66.57
   0  16   9  295.64  141.41
   0  16  10    3.82   17.25
   0  16 -10  -29.77   58.88
   0  16  10  131.39   77.70
   0  16  11   35.01   47.42
   0  16 -11  -21.88   44.37
   0  16  11   27.07   41.53
   0  16  12  -48.83   33.70
   0  16 -12   39.50   31.03
   0  16  12   38.64   67.63
   0  16  13  585.86  180.12
   0  16 -13  629.17  138.35
   0  16  13  491.20  156.10
   0  16  14  334.76  151.92
   0  16 -14  515.89  124.04
   0  16  14  400.44  149.15
   0  16  15   83.59   33.76
   0  16 -15  104.45   64.80
   0  16  15  130.22   54.75
   0  16  16  231.96   85.57
   0  16 -16  102.27   43.46
   0  16  16  251.24  117.48
   0  16  17  258.80  126.20
   0  16  17  151.65   67.07
   0 -16  17  116.44   53.82
   0  16  18   98.02   46.99
   0 -16  18    2.52   55.12
   0  18   0  408.33  103.12
   0  18  -1 1879.99  260.61
   0  18   1 1662.65  216.82
   0  18  -2  209.92   87.80
   0  18   2  147.72   70.82
   0  18   3  620.15   79.94
   0  18  -3  729.20  233.29
   0  18   3  790.78  257.52
   0  18   4  881.56   45.63
   0  18  -4  731.72  212.53
   0  18   4  935.52  229.84
   0  18   5 4095.79  103.32
   0  18  -5 4483.32  104.97
   0  18   5 4385.41  120.74
   0  18   6   38.59   20.55
   0  18  -6   54.65   31.53
   0  18   6  124.19   67.54
   0  18   7  173.63   56.13
   0  18  -7  258.48   72.49
   0  18   7  234.66   82.89
   0  18   8   53.43   21.99
   0  18  -8   81.61   41.03
   0  18   8  232.66  122.38
   0  18   9  334.35   69.29
   0  18  -9  429.66  113.93
   0  18   9  384.70  118.08
   0  18  10  -77.81   32.15
   0  18 -10   37.69   28.02
   0  18  10   -5.90   29.03
   0  18  11   92.59   43.22
   0  18 -11   71.43   25.42
   0  18  11  139.35   60.41
   0  18  12  346.99  118.03
   0  18 -12  480.28  103.36
   0  18  12  418.35  189.40
   0  18  13   -3.51   36.40
   0  18 -13   31.24   26.07
   0  18  13  -50.87   73.56
   0  18  14  327.90  119.28
   0  18 -14  420.48  130.69
   0  18  14  394.61  129.21
   0  18  15   -3.46   41.41
   0  18 -15   74.64   38.08
   0  18  15   50.35   51.08
   0  18  16   53.63   42.75
   0  18 -16   50.31   33.08
   0  18  17  100.60   45.45
   0 -18  17   45.10   64.71
   0  20   0  415.41  192.47
   0  20  -1  128.95   66.99
   0  20   1  108.43   66.44
   0  20  -2   11.39   31.40
   0  20   2   91.96   65.79
   0  20  -3  194.41   68.83
   0  20   3  338.15  104.67
   0  20  -4  378.20  164.95
   0  20   4  496.46  249.30
   0  20  -5 2427.84  135.92
   0  20   5 2651.04  208.96
   0  20  -6  200.63   59.49
   0  20   6  138.12  102.53
   0  20  -7  100.11   58.64
   0  20   7  163.76   94.08
   0  20  -8  117.99   51.42
   0  20   8  179.15   83.52
   0  20  -9  -19.46   50.10
   0  20   9   76.55   43.19
   0  20 -10  149.57   65.38
   0  20  10   92.33   47.32
   0  20 -11  285.77   64.19
   0  20  11  219.25   61.08
   0  20 -12  -36.27   47.69
   0  20  12   -0.83   29.94
   0  20 -13  -42.07   46.38
   0  20  13  -18.32   63.95
   0  20 -14   72.41   57.67
   0  20 -15  100.20   77.58
   0  22   0  208.87   65.96
   0  22  -1  190.80   64.27
   0  22   1   -7.83   58.80
   0  22  -2  161.42  123.16
   0  22   2  144.40   65.76
   0  22  -3   -2.84   60.46
   0  22   3   50.44   53.32
   0  22  -4  217.41   70.18
   0  22   4  187.85   57.81
   0  22  -5   76.66   60.86
   0  22   5  -14.45   55.06
   0  22  -6  493.51  111.79
   0  22   6  400.56  154.69
   0  22  -7   60.44   27.85
   0  22   7   41.48   51.68
   0  22  -8  422.74   86.86
   0  22   8  467.59  130.98
   0  22  -9  130.41   50.29
   0  22   9   50.32   47.42
   0  22 -10  162.22   55.61
   0  22  10   27.35   31.90
   0  22 -11   39.12   31.67
   0  22  11   92.09   70.62
   0  22 -12   87.74   38.04
   0  24   0   12.86   73.65
   0  24  -1   49.25   83.24
   0  24   1  211.20   94.53
   0  24  -2   73.17   33.74
   0  24   2   31.48   52.01
   0  24  -3  385.31  174.93
   0  24   3  464.12  177.30
   0  24  -4   94.53   41.10
   0  24   4  114.66   54.62
   0  24  -5  -86.27   57.27
   0  24   5   -0.36   58.28
   0  24  -6  163.42   91.13
   0  24   6  170.68  115.18
   0  24  -7  206.42   98.06
   0  24   7  176.35  132.62
   0  24  -8   73.43   52.50
   0  24  -9   52.20   33.15
  -1   1  23   35.91   35.85
  -1  -1  23   -2.29   43.07
  -1   1  22  195.92   70.85
   1   1 -22  234.13  105.49
   1  -1 -22  386.24  126.13
  -1  -1  22  270.87   77.30
  -1   1  21    9.71   50.04
   1   1 -21   62.80   29.42
   1  -1 -21   -0.35   68.14
  -1  -1  21   40.84   49.58
  -1   1  20  -22.82   60.86
   1   1 -20   38.44   21.59
   1  -1 -20   40.00   26.36
  -1  -1  20  -16.63   61.21
  -1   1  19  711.70  226.15
   1   1 -19  645.68  206.51
   1  -1 -19  639.70  217.30
  -1  -1  19  754.47  221.72
  -1   1  18   44.08   23.75
   1   1 -18   63.72   43.85
   1  -1 -18   84.45   65.48
  -1  -1  18  130.40   71.80
  -1   1  17   65.73   42.21
   1   1 -17   72.08   45.15
   1  -1 -17   73.39   57.95
  -1  -1  17  -43.02   46.03
  -1   1  16  397.99   58.32
   1   1 -16  256.50   72.97
   1  -1 -16  349.62   65.59
  -1  -1  16  327.79   63.68
  -1   1  15 2285.05  145.91
   1   1 -15 2106.94   91.04
   1  -1 -15 2450.49  105.19
  -1  -1  15 2164.60  112.54
  -1   1  14  512.77  114.76
   1   1 -14  530.71  134.05
   1  -1 -14  546.07  146.25
  -1  -1  14  383.72  101.49
  -1   1  13  656.68  187.59
   1   1 -13  491.26  161.15
   1  -1 -13  592.66  141.21
  -1  -1  13  605.78  181.18
  -1   1  12  853.85   79.05
   1   1 -12  789.39   53.01
   1  -1 -12  783.23  154.23
  -1  -1  12  879.39   97.14
  -1   1  11   82.64   41.08
   1   1 -11   34.20   30.46
   1  -1 -11  -25.12   43.79
  -1  -1  11  -46.58   40.52
  -1   1  10 1728.16   57.88
   1   1 -10 1663.58   68.77
   1  -1 -10 1578.97   64.31
  -1  -1  10 1684.22  101.87
  -1   1   9  213.04   38.80
   1   1  -9  171.11   57.20
   1  -1  -9  295.31   96.77
  -1  -1   9  218.47   34.53
  -1   1   8  663.39   43.63
   1   1  -8  567.05   86.12
   1  -1  -8  563.36  140.41
  -1  -1   8  650.26  134.72
  -1   1   7  260.85   72.62
   1   1  -7  342.65   95.30
  -1   1   7  256.25   80.72
  -1  -1   7  279.04   70.90
  -1  -1   7  230.51   51.87
   1  -1  -7  269.97  115.92
  -1  -1   7  289.37   70.20
   1  -1  -7  298.23   53.19
  -1   1   615962.41  127.91
  -1   1   616689.41  163.44
  -1  -1   614187.71  107.22
  -1  -1   616512.71  131.62
  -1   1   5    8.34   36.55
   1   1  -5   26.40   32.70
  -1   1   5   36.01   26.04
  -1  -1   5   19.97   30.23
  -1  -1   5   30.60   20.93
   1  -1  -5   -8.90   33.57
   1  -1  -5   36.49   21.53
  -1  -1   5   98.16   52.42
  -1   1   4 2473.30   85.00
   1   1  -4 2259.96   81.48
  -1   1   4 2318.07   75.18
  -1  -1   4 2348.29   89.78
  -1  -1   4 2006.46   67.79
   1  -1  -4 2363.24   82.96
   1  -1  -4 2410.27   80.96
  -1  -1   4 2394.67  158.76
  -1   1   3 2701.78   73.65
   1   1  -3 2502.30   93.08
   1  -1  -3 2530.56   87.41
  -1  -1   3 2279.15   37.64
  -1  -1   3 2562.69   56.05
   1  -1  -3 2582.18   67.50
  -1   1   1  -15.71   10.64
   1   1  -1  -38.94    9.28
  -1   1   1  -10.83    9.70
   1   1   2  551.93   38.20
   1   1   2  514.96   23.74
  -1   1  -2  558.55   28.98
  -1   1  -2  576.12   50.25
   1  -1   2  448.38   21.68
  -1  -1  -2  521.34   29.46
  -1  -1  -2  505.90   29.27
   1   1   3  893.37  145.21
   1   1   3  778.40   29.05
  -1   1  -3  705.09   39.49
   1  -1   3  708.04   32.45
   1  -1   3  608.57   34.42
  -1  -1  -3  837.38  171.46
  -1  -1  -3  748.85   28.63
   1  -1   3  683.03   58.75
   1  -1   4 6935.28  141.10
   1  -1   4 6927.08  158.97
   1   1   5 6179.55  208.35
   1   1   5 6245.81  131.11
  -1  -1  -5 6216.01  134.81
   1  -1   5 5935.19  127.00
   1  -1   5 6567.83  137.44
   1  -1   5 6457.61  139.28
   1   1   6  311.81   97.49
  -1   1  -6  314.23  116.85
   1   1   6  317.79   97.44
   1  -1   6  327.95   71.89
   1  -1   6  301.77   56.10
  -1  -1  -6  304.49   97.29
   1  -1   6  294.84   89.56
  -1  -1  -6  423.29   50.55
   1   1   7 5435.05  146.81
  -1   1  -7 5491.66  144.22
  -1  -1  -7 5520.04  145.57
   1  -1   7 4666.36  124.15
   1  -1   7 5078.85  149.70
   1  -1   7 5432.51  197.54
  -1  -1  -7 5090.47  145.63
   1   1   8  850.33   54.28
  -1   1  -8  959.02   66.69
  -1  -1  -8  840.58  102.25
   1  -1   8  983.32  177.26
   1   1   9   -2.37   33.04
  -1   1  -9   -5.15   41.91
  -1  -1  -9   31.34   19.13
   1  -1   9   -1.89   24.33
   1   1  10 2070.07  129.59
  -1   1 -10 1899.59  122.82
  -1  -1 -10 1899.55  223.13
   1  -1  10 1810.09   94.83
   1   1  11 3030.68   84.52
  -1   1 -11 2744.87   76.62
  -1  -1 -11 3040.26   84.26
   1  -1  11 2956.82  151.55
   1   1  12 3221.64  106.50
  -1   1 -12 3069.84  121.87
  -1  -1 -12 2703.39  144.76
   1  -1  12 3218.68  105.54
   1   1  13   34.35   59.03
  -1   1 -13   50.75   16.47
  -1  -1 -13   -0.57   52.76
   1  -1  13  118.28   51.84
   1   1  14  685.36  191.12
  -1   1 -14  672.98  221.37
  -1  -1 -14  674.31  166.85
   1  -1  14  659.90  152.53
   1   1  15 1792.65  146.08
  -1   1 -15 1659.69   84.47
  -1  -1 -15 1626.14  334.72
   1  -1  15 1665.89  108.05
   1   1  16   69.41   31.04
  -1   1 -16  -43.94   46.73
  -1  -1 -16   84.27   41.51
   1  -1  16   79.82   58.48
   1   1  17 1765.99  103.33
  -1   1 -17 1442.40   80.93
  -1  -1 -17 1601.63  179.04
   1  -1  17 1556.26  113.81
   1   1  18   87.76   38.67
  -1   1 -18  119.74   61.27
  -1  -1 -18  104.93   82.68
   1  -1  18  -18.66   56.51
   1   1  19  182.13   56.48
  -1   1 -19   93.45   30.57
  -1  -1 -19   -6.57   57.32
   1  -1  19  130.97   47.63
   1   1  20  301.43  144.46
  -1   1 -20  293.46  112.92
  -1  -1 -20  299.12   97.24
   1  -1  20  304.15  106.80
   1   1  21  -31.71   56.70
  -1   1 -21   53.13   52.54
  -1  -1 -21   17.19   40.83
   1  -1  21   45.91   54.75
  -1   1 -22  176.31   98.51
   1   1  22  174.26   84.34
   1  -1  22  142.61   82.20
  -1   3  23  133.38   86.46
  -1  -3  23   15.72   21.52
  -1   3  22  165.30   93.60
   1   3 -22  180.19  111.99
   1  -3 -22  195.17   84.10
  -1  -3  22   22.00   57.82
  -1   3  21   40.75   28.28
   1   3 -21   39.37   34.27
   1  -3 -21  -29.87   66.16
  -1  -3  21   48.67   36.06
  -1   3  20   -7.08   40.36
   1   3 -20   43.10   33.27
   1  -3 -20   12.80   36.45
  -1  -3  20   56.43   44.34
  -1   3  19   68.36   42.67
   1   3 -19   46.72   31.70
   1  -3 -19   54.25   31.48
  -1  -3  19   39.79   58.36
  -1   3  18  384.12  106.05
   1   3 -18  333.91  102.42
   1  -3 -18  442.29  117.54
  -1  -3  18  278.72   74.44
  -1   3  17  671.21  151.79
   1   3 -17  709.67  186.06
   1  -3 -17  593.97  160.40
  -1  -3  17  475.88  162.47
  -1   3  16  131.61   45.53
   1   3 -16  120.11   47.89
   1  -3 -16  134.55   45.36
  -1  -3  16   84.18   44.53
  -1   3  15 1407.33   98.84
   1   3 -15 1211.87  291.43
   1  -3 -15 1226.06  281.37
  -1  -3  15 1196.38   72.75
  -1   3  14  343.65   95.73
   1   3 -14  280.24   68.92
   1  -3 -14  424.56   99.00
  -1  -3  14  354.05   88.09
  -1   3  13  187.27   65.54
   1   3 -13  199.77   67.49
   1  -3 -13   71.20   45.10
  -1  -3  13  180.25   94.00
  -1   3  12 1315.23  104.47
   1   3 -12 1193.82   88.07
   1  -3 -12 1285.74  210.24
  -1  -3  12 1244.66  101.78
  -1   3  11  238.11   59.27
   1   3 -11  246.73   59.30
   1  -3 -11  265.29   74.75
  -1  -3  11  252.20   61.90
  -1   3  10  544.90  106.15
   1   3 -10  375.26  105.75
   1  -3 -10  407.14  126.00
  -1  -3  10  531.88  115.09
  -1   3   9  547.59  132.37
   1   3  -9  233.46  136.81
   1  -3  -9  505.83  129.05
  -1  -3   9  532.38   81.34
  -1   3   8 1450.16   86.52
   1   3  -8 1315.01   62.59
   1  -3  -8 1222.69   55.39
  -1  -3   8 1283.64   48.81
  -1   3   711800.93  174.16
   1   3  -711956.96  177.61
   1  -3  -711784.97  205.44
  -1  -3   710641.16  156.54
  -1  -3   711430.18  165.99
   1  -3  -711421.94  166.86
  -1  -3   711083.10  162.74
  -1   3   6  329.01   89.00
   1   3  -6  370.59  119.62
   1   3  -6  334.57   81.67
  -1   3   6  401.05   94.63
  -1  -3   6  362.47   94.62
  -1  -3   6  252.08   45.51
   1  -3  -6  367.93  105.91
   1  -3  -6  318.52   82.34
   1   3  -5 1328.27   67.31
  -1   3   5 1264.52   41.56
   1   3  -5 1198.31   44.36
  -1   3   5 1332.84  117.89
  -1  -3   5 1318.65   54.45
  -1  -3   5 1156.39   51.81
   1  -3  -5 1259.20   65.14
   1  -3  -5 1321.93   71.10
   1   3  -4  267.65   81.51
  -1   3   4  219.39   70.01
   1   3  -4  249.53   46.14
  -1   3   4  305.82   76.62
  -1  -3   4  252.60   64.67
  -1  -3   4  226.28   54.68
   1  -3  -4  297.56   53.70
   1  -3  -4  296.39   45.67
  -1   3   253916.74  324.29
  -1   3   251119.46  308.38
   1   3  -252572.98  315.71
   1  -3  -250906.12  303.24
  -1  -3   255197.37  308.88
   1  -3  -253672.18  312.45
  -1   3   119730.58  127.93
   1   3  -119825.81  131.26
  -1  -3   119196.64  150.76
   1   3   0  220.65   31.35
  -1   3   0  227.48   33.28
  -1   3   0  127.59   58.20
   1   3   0  248.96   54.30
   1  -3   0  176.29   29.47
   1  -3   0  202.57   45.35
  -1  -3   0  195.44   37.49
  -1   3  -1   74.70   22.69
   1   3   1   52.13   18.65
  -1   3  -1  115.05   59.89
   1   3   1   32.97   26.60
   1  -3   1   83.53   19.27
   1  -3   1   52.08   27.03
  -1  -3  -1   22.97   17.27
  -1  -3  -1   76.12   38.39
   1   3   2 3623.40  101.56
   1   3   2 3810.53   91.69
  -1   3  -2 4010.98  102.39
   1  -3   2 3972.98   92.72
   1  -3   2 3845.83   97.43
  -1  -3  -2 3743.40   93.24
  -1   3  -3 2218.47   70.08
   1   3   3 2227.23   71.83
  -1   3  -3 2141.72   74.74
   1   3   3 2225.78  155.32
   1  -3   3 2356.57   82.52
   1  -3   3 2067.83   71.15
  -1  -3  -3 2108.21   77.84
  -1  -3  -3 2124.43   97.36
  -1   3  -4 1427.00   82.64
   1   3   4 1615.63   63.47
  -1   3  -4 1294.59   58.48
   1   3   4 1574.89  147.07
   1  -3   4 1428.83   91.09
   1  -3   4 1146.70   75.64
  -1  -3  -4 1664.41  108.17
  -1  -3  -4 1710.79  123.48
  -1   3  -5  570.99   48.63
   1   3   5  627.35   35.01
  -1   3  -5  661.06  136.81
   1   3   5  760.46  118.99
   1  -3   5  656.99   34.81
   1  -3   5  552.28  108.27
  -1  -3  -5  646.73   41.44
  -1  -3  -5  716.52  119.75
   1   3   6 2625.59   87.06
  -1   3  -6 2681.70  138.45
  -1   3  -6 2557.41   92.21
   1   3   6 2779.80  125.06
   1  -3   6 2514.83   80.58
   1  -3   6 2319.64   82.97
  -1  -3  -6 2513.83  107.67
  -1  -3  -6 2682.70  111.14
  -1   3  -7   45.72   27.96
   1   3   7  -43.19   40.14
  -1  -3  -7   53.97   43.99
   1  -3   7  -63.89   25.57
   1  -3   7  -12.35   37.46
   1   3   8 1534.74  128.45
  -1   3  -8 1644.65   75.53
  -1  -3  -8 1515.20   76.86
   1  -3   8 1616.70  123.48
   1   3   9  105.61   47.96
  -1   3  -9  127.76   84.24
  -1  -3  -9  125.93   61.32
   1  -3   9   70.23   30.04
   1   3  10 1357.33  100.23
  -1   3 -10 1223.60   93.83
  -1  -3 -10 1383.88  124.08
   1  -3  10 1293.05  154.00
   1   3  11  800.15  160.27
  -1   3 -11  748.36   57.18
  -1  -3 -11  876.33   60.00
   1  -3  11  752.26   70.44
  -1   3 -12 8629.44  185.83
   1   3  12 8877.25  172.18
   1  -3  12 8439.77  168.24
   1   3  13 2512.74   93.15
  -1   3 -13 2421.50   76.29
  -1  -3 -13 2490.60   84.11
   1  -3  13 2695.13  180.17
   1   3  14 2576.93  136.46
  -1   3 -14 2647.44  135.15
  -1  -3 -14 2719.46  127.78
   1  -3  14 2436.93   93.03
   1   3  15  119.89   34.83
  -1   3 -15   66.37   35.38
  -1  -3 -15  237.54   70.19
   1  -3  15  107.67   23.32
   1   3  16  100.03   43.27
  -1   3 -16  151.57   57.27
  -1  -3 -16   37.76   35.15
   1  -3  16  -15.70   46.43
   1   3  17   23.76   49.81
  -1   3 -17   11.05   44.98
  -1  -3 -17   95.26   50.71
   1  -3  17   61.08   25.44
   1   3  18   69.32   26.66
  -1   3 -18  152.49   51.74
  -1  -3 -18   68.26   82.94
   1  -3  18   29.39   41.72
   1   3  19  227.18   84.60
  -1   3 -19  125.59   60.71
  -1  -3 -19  122.74   70.79
   1  -3  19  240.32   94.42
   1   3  20  464.50  125.90
  -1   3 -20  348.55   60.80
  -1  -3 -20  317.10  106.71
   1  -3  20  188.61   94.22
   1   3  21   57.54   42.00
  -1   3 -21  130.04   42.84
  -1  -3 -21   50.99   60.31
   1  -3  21   91.06   40.29
  -1   3 -22  463.80  150.95
   1   3  22  293.28  160.42
   1  -3  22  315.48  167.20
  -1  -5  23   96.39   34.47
   1   5 -22   13.85   27.40
  -1   5  22   47.61   42.57
  -1  -5  22   49.31   42.41
  -1   5  21  108.75   67.65
   1  -5 -21  145.13   52.97
  -1  -5  21  126.73   94.29
  -1   5  20  143.01   66.90
   1   5 -20  191.79   59.57
   1  -5 -20  253.94   86.75
  -1  -5  20  197.75   52.65
  -1   5  19   16.40   34.47
   1   5 -19   15.54   24.71
   1  -5 -19   51.01   46.59
  -1  -5  19   28.55   41.22
  -1   5  18   23.18   39.65
   1   5 -18   33.57   32.22
   1  -5 -18  -22.57   46.48
  -1  -5  18   75.57   65.25
  -1   5  17  150.45   74.44
   1   5 -17  186.68   65.07
   1  -5 -17   11.42   39.44
  -1  -5  17  105.44   58.02
  -1   5  16 1007.67  102.21
   1   5 -16  851.23   77.67
   1  -5 -16  950.27  180.31
  -1  -5  16  917.81   84.05
  -1   5  15  157.51   55.81
   1   5 -15   51.32   48.93
   1  -5 -15  148.65   65.96
  -1  -5  15   84.29   79.16
  -1   5  14  -21.85   51.97
   1   5 -14   38.80   42.16
   1  -5 -14   33.67   42.88
  -1  -5  14   45.17   38.29
  -1   5  13   90.64   57.39
   1   5 -13   83.05   55.44
   1  -5 -13   63.45   37.96
  -1  -5  13   39.73   59.23
  -1   5  12 8454.91  172.59
   1   5 -12 7973.65  152.76
   1  -5 -12 8175.49  159.05
  -1  -5  12 8018.68  161.11
  -1   5  11  629.51  186.81
   1   5 -11  614.97  154.87
   1  -5 -11  764.96   72.17
  -1  -5  11  735.23  153.34
  -1   5  10   91.40   47.66
   1   5 -10  110.02   56.33
   1  -5 -10  146.38   58.94
  -1  -5  10  203.46   51.96
   1   5  -9  825.36   57.93
   1   5  -9 1008.55   61.09
  -1   5   9 1000.76   55.11
   1  -5  -9 1008.40   63.27
   1   5  -8 3054.37  120.61
   1   5  -8 3260.65  100.19
  -1   5   8 3496.52  182.74
   1  -5  -8 3310.39  105.34
  -1   5   7  800.02   57.48
   1   5  -7  614.23  114.59
   1   5  -7  745.25   79.25
   1  -5  -7  645.38   49.07
  -1  -5   7  720.78   35.90
   1   5  -6 3259.96  136.37
  -1   5   6 3042.61   98.89
   1   5  -6 3129.25  106.83
  -1   5   6 3268.72  125.17
  -1  -5   6 3221.60  103.72
  -1  -5   6 3022.37  100.52
   1  -5  -6 3174.02  151.81
   1   5  -5 1290.73   42.93
  -1   5   5 1268.72   47.11
   1   5  -5 1338.09   57.60
  -1   5   5 1472.21   75.39
  -1  -5   5 1355.08   47.25
  -1  -5   5 1289.31   48.14
   1  -5  -5 1370.31   57.36
   1  -5  -5 1427.07   51.77
   1   5  -4   40.31   24.68
  -1   5   4   14.91   24.95
   1   5  -4  -23.26   31.77
  -1   5   4    4.90   25.07
  -1  -5   4   22.00   11.07
  -1  -5   4   55.28   23.90
   1  -5  -4   33.37   34.66
   1  -5  -4   19.14   26.06
   1   5  -3 1029.84   42.03
  -1   5   3 1037.20   33.96
   1   5  -3 1006.00   56.52
  -1   5   3 1112.14   69.46
  -1  -5   3  975.90   39.55
  -1  -5   3  958.18   48.57
   1  -5  -3 1061.89   39.72
   1  -5  -3 1038.52   34.36
  -1   5   2 6998.41  139.72
   1   5  -2 7736.17  147.68
   1   5  -2 7794.53  177.09
  -1   5   2 7401.04  161.15
  -1   5   2 7774.23  162.32
  -1  -5   2 7153.16  149.00
  -1  -5   2 7385.56  140.13
   1  -5  -2 7278.97  148.79
  -1   5   1 8700.25  169.45
   1   5  -1 9012.98  180.57
  -1   5   1 8988.48  181.94
  -1  -5   1 8602.64  161.99
  -1  -5   1 9008.77  182.17
   1   5   0 2867.70   67.28
  -1   5   0 3011.85   91.63
   1   5   0 3007.91   81.31
   1   5   0 3138.42  112.59
  -1   5   0 3095.13   98.60
   1  -5   0 2755.78   74.49
   1  -5   0 2846.95   85.04
  -1  -5   0 3132.89  158.29
  -1   5  -1 2939.95   71.66
   1   5   1 2842.08   68.98
  -1   5  -1 3333.92  157.29
   1   5   1 3056.07   94.89
   1  -5   1 2747.03   65.25
   1  -5   1 2891.50  117.35
  -1  -5  -1 2861.00   71.34
  -1  -5  -1 2933.28  118.36
  -1   5  -2  282.08   59.67
   1   5   2  268.34   22.04
  -1   5  -2  244.48   51.10
   1   5   2  208.20   57.12
   1  -5   2  258.55   42.24
   1  -5   2  255.50   65.12
  -1  -5  -2  296.51   80.47
  -1  -5  -2  252.39   59.41
  -1   5  -3  930.57   34.75
   1   5   3 1007.30   31.98
  -1   5  -3  773.70  108.98
   1   5   3 1219.26  197.93
   1  -5   3  908.20   65.73
   1  -5   3  898.14   45.95
  -1  -5  -3  974.40   42.22
  -1  -5  -3 1101.28   48.22
  -1   5  -4 1371.78   49.97
   1   5   4 1437.06   69.27
  -1   5  -4 1329.03   59.78
   1   5   4 1585.10   74.42
   1  -5   4 1335.47   57.48
   1  -5   4 1398.99   58.56
  -1  -5  -4 1486.10  126.14
  -1  -5  -4 1455.95   64.71
  -1   5  -5 1674.83   90.40
   1   5   5 1665.07   59.69
  -1   5  -5 1402.89   52.34
   1   5   5 1769.55   72.81
   1  -5   5 1644.89   73.57
   1  -5   5 1526.40  122.37
  -1  -5  -5 1609.73  133.23
  -1  -5  -5 1744.61   68.27
   1   5   610018.10  164.37
  -1   5  -6 9836.95  147.20
  -1   5  -6 9216.19  144.68
  -1  -5  -6 9384.39  147.14
   1  -5   6 9525.75  148.29
   1   5   7 1005.28  170.38
  -1   5  -7  977.98   50.43
  -1   5  -7  970.73  201.64
  -1  -5  -7  872.81   39.86
   1  -5   7  866.83   79.34
  -1   5  -8 3841.07  151.46
  -1   5  -8 4253.35   68.09
   1   5   8 4495.50  153.33
  -1  -5  -8 4271.89   76.29
   1   5   9  108.09   39.87
  -1   5  -9   72.69   49.14
  -1  -5  -9  -31.82   42.88
   1   5  10  452.91  124.89
  -1   5 -10  309.17   96.04
  -1  -5 -10  488.91  129.00
   1  -5  10  370.53   81.71
   1   5  11  316.79  111.69
  -1   5 -11  215.64   66.54
  -1  -5 -11  253.90   82.22
   1  -5  11  235.30   77.68
   1   5  12 5976.08  153.24
  -1   5 -12 5674.26  137.47
  -1  -5 -12 6075.59  134.77
   1  -5  12 5701.42  136.24
   1   5  13 2133.01  189.74
  -1   5 -13 2176.84  116.67
  -1  -5 -13 2193.05  129.04
   1  -5  13 2182.92  163.11
   1   5  14  120.31   44.35
  -1   5 -14   70.02   29.96
  -1  -5 -14  184.51   45.64
   1  -5  14  145.26   44.15
   1   5  15 1782.11  137.86
  -1   5 -15 1663.61  212.61
  -1  -5 -15 1580.82  187.62
   1  -5  15 1463.30  121.88
   1   5  16   95.42   42.03
  -1   5 -16   53.23   46.44
  -1  -5 -16   57.24   50.76
   1  -5  16  -13.82   45.78
   1   5  17  406.94  150.91
  -1   5 -17  193.44  109.41
  -1  -5 -17  483.31  148.92
   1  -5  17  461.91  119.75
   1   5  18  111.56   88.42
  -1   5 -18  184.15   79.89
  -1  -5 -18   89.23   61.64
   1  -5  18  125.64   39.58
  -1   5 -19  -12.14   54.45
  -1  -5 -19   61.60   44.22
   1  -5  19   88.03   66.11
   1   5  20   37.36   29.59
  -1   5 -20  167.35   69.82
  -1  -5 -20   54.70   37.86
   1  -5  20   43.84   50.27
   1   5  21  -22.41   53.22
  -1   5 -21   13.98   20.37
  -1  -5 -21   26.95   63.69
   1  -5  21   -3.81   59.67
  -1   5 -22  100.11   48.10
   1  -5  22   65.06   51.35
   1   7 -22   57.05   31.16
  -1   7  22   63.78   60.00
  -1  -7  22   60.71   31.78
  -1   7  21   75.19   55.80
   1   7 -21   95.47   40.59
   1  -7 -21  -74.07   62.61
  -1  -7  21   87.13   39.54
  -1   7  20  348.43  105.64
   1   7 -20  267.29  110.07
   1  -7 -20  329.55  102.54
  -1  -7  20  259.87  127.92
  -1   7  19  143.59   71.12
   1   7 -19  124.89   72.17
   1  -7 -19  111.40   47.90
  -1  -7  19  135.90   41.24
  -1   7  18  434.11  140.11
   1   7 -18  372.01  148.41
   1  -7 -18  314.65   74.64
  -1  -7  18  338.08   67.39
  -1   7  17  100.57   49.70
   1   7 -17  111.90   39.44
   1  -7 -17   64.63   48.74
  -1  -7  17  206.17   63.71
  -1   7  16  582.75  194.99
   1   7 -16  444.49  107.79
   1  -7 -16  598.86  150.62
  -1  -7  16  597.12  187.82
  -1   7  15  -86.82   50.98
   1   7 -15   10.70   24.22
   1  -7 -15   41.60   49.84
  -1  -7  15   60.26   18.60
  -1   7  14  883.15   84.06
   1   7 -14  846.43  111.42
   1  -7 -14  794.49  165.84
  -1  -7  14  706.67  133.72
  -1   7  13   66.02   50.91
   1   7 -13   41.04   31.71
   1  -7 -13   69.10   47.65
  -1  -7  13   46.13   44.09
  -1   7  12 2783.81  117.01
   1   7 -12 2390.54   80.25
   1  -7 -12 2404.05   71.70
  -1  -7  12 2572.57  201.67
   1   7 -11 2994.81   89.03
   1   7 -11 2911.26   66.70
  -1   7  11 3376.98  115.64
   1  -7 -11 2987.17  149.30
   1   7 -10   48.39   25.87
   1   7 -10   60.92   44.65
  -1   7  10  102.41   52.03
   1  -7 -10   34.45   22.58
   1   7  -9    0.90   19.28
   1   7  -9   42.17   13.29
  -1   7   9  111.61   62.80
   1  -7  -9   77.46   35.75
  -1   7   8 1202.17   65.52
   1   7  -8 1134.39   45.78
   1   7  -8 1119.40   93.02
   1  -7  -8 1067.61  140.29
  -1  -7   8 1150.06   57.48
  -1   7   7  444.65   92.23
   1   7  -7  500.64   45.34
   1   7  -7  434.41  150.92
   1  -7  -7  498.48  115.66
  -1  -7   7  475.10   35.13
  -1   7   6  743.43  176.03
   1   7  -6  617.05   44.74
   1   7  -6  610.90  139.51
   1  -7  -6  623.68  106.46
  -1  -7   6  565.04   46.43
  -1   7   5 4839.53  133.60
  -1   7   5 4718.83  131.68
   1   7  -5 4886.25  118.93
   1   7  -5 4559.03  181.24
  -1  -7   5 4676.28  112.54
   1  -7  -5 4395.86  122.17
  -1   7   4   89.74   29.45
   1   7  -4  156.65   30.75
   1   7  -4  109.09   45.78
  -1   7   4  164.50   38.10
  -1   7   4   57.76   30.91
  -1  -7   4   50.33   28.19
  -1  -7   4  117.62   32.32
  -1   7   3 9694.20  149.89
   1   7  -310856.70  142.85
   1   7  -310738.77  160.56
  -1   7   310011.46  143.79
  -1   7   310395.52  158.69
  -1  -7   310006.02  147.69
  -1  -7   310374.99  137.67
   1  -7  -310162.40  191.61
  -1   7   2  175.62   39.63
   1   7  -2  176.14   40.59
  -1   7   2  168.38   41.40
  -1   7   2  108.58   40.44
  -1  -7   2   88.82   32.52
  -1  -7   2  158.53   22.25
   1  -7  -2  179.51   47.34
   1   7  -1 2445.71   58.61
  -1   7   1 2428.72   71.62
   1   7  -1 2634.66   63.03
  -1   7   1 2422.24   75.32
   1   7  -1 2578.68   58.61
  -1  -7   1 2581.81  101.67
   1  -7  -1 2484.52   88.96
   1   7   0  472.68   18.55
  -1   7   0  484.88   24.06
   1   7   0  465.50   32.91
   1   7   0  613.98  126.93
  -1   7   0  550.83  174.15
   1  -7   0  401.34   40.69
   1  -7   0  442.40  112.88
  -1  -7   0  394.70   75.74
   1   7   1  312.14   67.71
  -1   7  -1  378.71   28.93
  -1   7  -1  383.80  128.92
   1   7   1  347.35   29.79
   1   7   1  383.30  104.10
   1  -7   1  317.82   67.80
   1  -7   1  355.68   26.05
  -1  -7  -1  357.21   79.90
   1   7   2   82.71   32.30
  -1   7  -2   30.51   11.69
  -1   7  -2   36.08   18.20
   1   7   2   42.45   23.46
   1   7   2  153.56   42.96
   1  -7   2   17.94   26.08
   1  -7   2   31.83    7.89
  -1  -7  -2   87.34   20.17
  -1   7  -3  468.12   39.39
   1   7   3  470.31   53.22
  -1   7  -3  587.32  127.69
   1   7   3  463.07  115.95
   1  -7   3  486.37   30.73
   1  -7   3  454.55   85.16
  -1  -7  -3  426.14   92.62
  -1  -7  -3  349.78   89.56
   1   7   4  511.72  105.98
   1   7   4  382.20   35.59
  -1   7  -4  483.19   31.17
  -1   7  -4  513.87  141.66
   1  -7   4  510.69   31.82
  -1  -7  -4  458.45  108.86
   1   7   5  689.00  168.19
   1   7   5  491.59   62.96
  -1   7  -5  636.24   42.81
  -1   7  -5  527.72  149.00
   1  -7   5  521.98   50.20
  -1  -7  -5  582.39  124.12
   1   7   6  497.97  127.39
  -1   7  -6  439.56   90.28
  -1   7  -6  487.46  122.32
  -1  -7  -6  447.72  107.98
   1  -7   6  434.09   33.06
   1   7   7  426.71   85.29
  -1   7  -7  424.85   78.10
  -1   7  -7  412.85   85.34
  -1  -7  -7  298.91   62.44
   1  -7   7  281.14   83.98
  -1   7  -8 2603.02  213.36
  -1   7  -8 2742.49  133.24
   1   7   8 3252.51  156.93
  -1  -7  -8 2897.84  102.91
  -1   7  -9  222.46   46.37
  -1   7  -9  292.69   70.61
   1   7   9  292.53   82.06
  -1  -7  -9  326.24   61.25
  -1   7 -10   16.77   29.67
  -1   7 -10   14.36   14.02
   1   7  10   12.36   24.60
  -1  -7 -10   73.38   29.57
   1   7  11   80.94   61.56
  -1   7 -11   49.55   16.50
  -1  -7 -11   -3.19   51.55
   1   7  12  -21.97   58.08
  -1   7 -12   75.47   37.85
  -1  -7 -12   22.81   37.95
   1  -7  12   40.06   32.12
   1   7  13   92.30   43.56
  -1   7 -13  139.19   55.31
  -1  -7 -13   69.82   50.27
   1  -7  13  171.32   52.11
   1   7  14  636.77  140.79
  -1   7 -14  687.69  200.63
  -1  -7 -14  830.05  189.18
   1  -7  14  783.67  160.74
   1   7  15  260.34   82.21
  -1   7 -15  400.40   74.89
  -1  -7 -15  299.01   72.30
   1  -7  15  201.72   45.72
   1   7  16  126.03   55.51
  -1   7 -16   79.36   19.42
  -1  -7 -16  -21.48   63.08
   1  -7  16   52.67   35.20
   1   7  17  -37.64   57.11
  -1   7 -17   73.22   28.65
  -1  -7 -17   85.38   47.57
   1  -7  17   85.82   37.50
   1   7  18   26.85   37.38
  -1   7 -18   39.18   21.47
  -1  -7 -18   76.86   58.82
   1  -7  18   75.35   54.19
   1   7  19   97.94   65.52
  -1   7 -19   77.45   43.64
  -1  -7 -19   70.95   93.67
   1  -7  19   16.75   41.36
   1   7  20   -1.46   36.35
  -1   7 -20    2.13   29.98
  -1  -7 -20  125.17   69.81
   1  -7  20   70.98   60.29
   1   7  21   38.88   28.72
  -1   7 -21   26.52   41.85
  -1  -7 -21  -79.68   62.65
   1  -7  21   85.28   50.57
  -1   7 -22   34.27   33.66
   1  -7  22   48.00   39.76
  -1  -9  22   26.15   26.89
   1   9 -21  -22.24   34.27
  -1   9  21   50.41   57.20
  -1  -9  21   31.46   27.00
   1   9 -20   68.85   32.12
  -1   9  20  115.06   48.23
  -1   9  20  111.95   67.81
  -1  -9  20   26.48   54.89
   1   9 -19  547.47  213.93
  -1   9  19  750.77  115.44
  -1  -9  19  531.98  163.98
  -1   9  18  493.56  130.55
   1   9 -18  569.91  170.91
   1  -9 -18  476.87  127.48
  -1  -9  18  573.24   82.04
  -1   9  17  419.26  163.13
   1   9 -17  427.26   69.93
   1  -9 -17  431.31  145.59
  -1  -9  17  400.58   71.86
  -1   9  16  -20.72   55.03
   1   9 -16   89.67   38.76
   1  -9 -16   68.08   48.37
  -1  -9  16   80.04   27.84
  -1   9  15  473.05   99.20
   1   9 -15  430.05   73.52
   1  -9 -15  390.88   65.72
  -1  -9  15  419.83   98.82
  -1   9  14   77.54   44.03
   1   9 -14  269.41   63.42
   1  -9 -14  368.59  113.28
  -1  -9  14  348.22  110.94
  -1   9  13   58.63   47.86
   1   9 -13   17.84   21.44
   1  -9 -13   36.17   59.11
  -1  -9  13   55.76   36.23
   1   9 -12  275.17   61.08
   1   9 -12  173.43   31.10
  -1   9  12  195.35   40.67
   1  -9 -12  252.62   42.73
   1   9 -11  805.83  221.07
   1   9 -11  880.44   67.18
  -1   9  11  972.60   99.31
   1  -9 -11  961.98  180.12
   1   9 -10   26.36   29.63
   1   9 -10   21.41   12.99
  -1   9  10   35.74   40.11
   1  -9 -10  118.91   60.62
   1   9  -9   -7.10   18.79
   1   9  -9   27.39   15.47
  -1   9   9   60.88   29.23
   1  -9  -9 -100.04   51.20
  -1   9   8  174.80   69.08
   1   9  -8  391.78  108.89
   1   9  -8  276.83   74.07
   1  -9  -8  313.17   89.66
  -1  -9   8  324.79   31.24
  -1   9   7   61.16   49.91
   1   9  -7    4.55   11.60
   1   9  -7   72.80   33.67
   1  -9  -7   48.63   21.97
  -1  -9   7   25.17   14.13
   1   9  -6  428.35   38.59
   1   9  -6  389.19  131.92
  -1   9   6  506.26  128.12
  -1   9   6  458.06  137.47
  -1  -9   6  409.82   47.13
   1   9  -5  107.50   24.83
   1   9  -5  127.58   40.90
  -1   9   5  103.69   63.52
  -1   9   5  158.05   62.16
  -1  -9   5  175.53   22.71
  -1   9   4 6003.05  171.09
   1   9  -4 6111.53  124.24
  -1   9   4 6375.02  156.05
  -1   9   4 6399.86  145.42
  -1  -9   4 5898.03  124.22
  -1   9   3 4365.68  103.87
   1   9  -3 4614.22   94.69
   1   9  -3 4677.33  133.98
  -1   9   3 4525.22  103.59
  -1   9   3 4754.77  122.85
  -1  -9   3 4225.06   47.79
  -1   9   2    5.76   10.05
  -1   9   2   20.64   14.60
  -1   9   2   -7.91   25.90
   1   9  -2   11.45   42.14
  -1  -9   2   22.67    7.96
  -1   9   1  415.95   41.31
   1   9  -1  402.78   31.87
   1   9  -1  424.17   33.85
  -1   9   1  418.90   42.30
   1   9  -1  509.31  112.12
  -1   9   1  530.57  166.31
   1   9   0  608.03   32.03
  -1   9   0  648.70   28.90
   1   9   0  571.02   38.98
   1   9   0  565.76   53.35
  -1   9   0  786.92  186.83
   1  -9   0  595.26   53.85
   1   9   1  284.87   24.62
  -1   9  -1  322.59   28.29
   1   9   1  305.82   53.97
   1   9   1  360.27   73.31
  -1   9  -1  358.74   95.78
   1  -9   1  279.52   55.49
   1   9   2 1502.90   43.85
  -1   9  -2 1475.79   44.87
  -1   9  -2 1370.54   60.81
   1   9   2 1471.55   49.35
   1   9   2 1639.14  145.87
   1  -9   2 1331.09   40.16
   1   9   3 3394.90   89.47
  -1   9  -3 3856.55   96.86
  -1   9  -3 2984.70  194.70
   1   9   3 3366.92   91.10
   1   9   3 3724.42  169.34
   1  -9   3 3263.39   86.99
   1   9   4 2076.56   87.70
   1   9   4 2073.20   70.92
  -1   9  -4 1967.76   68.12
  -1   9  -4 1901.11   97.75
   1  -9   4 1849.17   51.37
  -1  -9  -4 1978.70   65.15
   1   9   5   61.81   37.39
  -1   9  -5   25.59   11.69
  -1   9  -5   41.94   30.77
  -1  -9  -5  -20.69   28.92
   1  -9   5   33.93   18.07
   1   9   6   -1.78   46.50
  -1   9  -6  -12.90   19.50
  -1   9  -6   14.03   53.07
  -1  -9  -6  -34.24   31.60
   1  -9   6   12.76   12.40
   1   9   7   71.39   50.06
  -1   9  -7  139.98   38.06
  -1   9  -7  187.03   71.56
  -1  -9  -7  105.55   54.13
   1  -9   7   98.51   18.06
  -1   9  -8 1719.75   66.60
  -1   9  -8 1797.61   69.80
   1   9   8 1948.93  164.20
  -1  -9  -8 1632.87   65.86
  -1   9  -9   21.44   17.20
  -1   9  -9   26.88   18.33
   1   9   9   -5.95   51.55
  -1  -9  -9   71.64   48.28
  -1   9 -10   87.22   31.79
  -1   9 -10   58.40   36.90
   1   9  10   71.76   44.72
  -1  -9 -10  192.41   92.10
  -1   9 -11 3096.44  164.19
  -1   9 -11 3198.20  120.56
   1   9  11 3250.77  128.35
  -1  -9 -11 2844.40   97.59
  -1   9 -12  186.55   61.74
  -1   9 -12  147.60   47.65
   1   9  12  155.49   50.19
  -1  -9 -12  170.79   63.43
   1   9  13  878.87  154.08
  -1   9 -13  735.01   67.12
  -1  -9 -13  587.41  127.63
   1  -9  13  707.66   80.44
   1   9  14  165.57   73.58
  -1   9 -14   88.64   44.86
  -1  -9 -14  147.41   69.36
   1  -9  14  182.19   56.55
   1   9  15  137.71   40.64
  -1   9 -15  187.47   41.32
  -1  -9 -15  176.06   71.27
   1  -9  15  184.63   43.65
   1   9  16  143.62   37.58
  -1   9 -16  133.68   59.36
  -1  -9 -16  124.45   82.02
   1  -9  16  158.41   50.07
   1   9  17  330.11   91.98
  -1   9 -17  400.38   79.86
  -1  -9 -17  316.52  106.16
   1  -9  17  330.78   93.12
   1   9  18  388.61  124.71
  -1   9 -18  252.98   68.39
  -1  -9 -18  229.04  111.84
   1  -9  18  210.76   59.78
   1   9  19   83.47   51.84
  -1   9 -19   38.46   23.54
  -1  -9 -19  -60.93   65.46
   1  -9  19   24.77   44.83
   1   9  20  422.55  143.57
  -1   9 -20  311.25   52.97
  -1  -9 -20  413.59  122.76
   1  -9  20  215.24   89.20
  -1   9 -21   13.58   23.86
   1  -9  21   81.30   52.78
  -1 -11  21  246.61  184.59
  -1  11  20  177.08   83.55
  -1  11  20   86.79   55.73
  -1 -11  20  101.92   47.01
  -1  11  19  269.89   89.55
  -1  11  19  110.97   48.25
  -1 -11  19  207.44  109.87
   1  11 -18  121.40   38.15
  -1  11  18  148.75  122.79
  -1  11  18  137.25   59.05
  -1 -11  18  193.92   78.47
   1  11 -17  260.77   67.19
  -1  11  17  160.81   61.11
  -1  11  17  339.12  117.34
  -1 -11  17  348.71   99.53
   1  11 -16   44.83   22.41
  -1  11  16   49.98   41.88
  -1  11  16   13.72   39.25
  -1 -11  16   71.76   42.99
   1  11 -15   62.23   32.99
  -1  11  15  106.91   57.48
  -1  11  15   34.65   26.01
  -1 -11  15   48.93   45.17
   1  11 -14   45.93   24.13
  -1  11  14   37.77   50.83
  -1  11  14   67.20   46.19
   1  11 -13   31.84   21.47
   1  11 -13   38.45   34.98
  -1  11  13  -22.71   63.03
   1  11 -12   89.38   38.84
   1  11 -12   62.73   54.82
  -1  11  12  120.64   78.27
   1  11 -11 2271.54   93.77
  -1  11  11 2318.53   86.11
   1  11 -11 2357.68   92.19
  -1  11  11 2801.08  235.17
   1  11 -10 2274.25   73.76
  -1  11  10 2394.48   88.70
   1  11 -10 2203.83   81.24
  -1  11  10 2549.46  100.00
   1  11  -9   35.16   16.98
   1  11  -9   46.72   30.49
  -1  11   9    9.47   55.50
  -1  11   9  -38.83   52.50
  -1 -11   9   33.05   19.41
   1  11  -8  131.83   32.19
   1  11  -8   80.54   30.83
  -1  11   8  153.40   62.46
  -1  11   8  168.07   58.28
  -1 -11   8  107.04   27.28
   1  11  -7   -4.82   14.69
   1  11  -7   38.91   30.20
  -1  11   7   44.95   49.05
  -1  11   7   63.08   41.92
  -1 -11   7   25.78   18.45
   1  11  -6   28.54   11.01
   1  11  -6   50.46   21.82
  -1  11   6   64.24   26.10
  -1  11   6  110.83   50.32
  -1 -11   6   53.71   14.37
   1  11  -5  868.05   25.96
   1  11  -5  883.71  185.21
  -1  11   5  948.33   55.37
  -1  11   5  940.82   70.69
  -1 -11   5  869.43   25.59
  -1  11   4   17.33    9.42
   1  11  -4   11.68    5.86
   1  11  -4    5.90   19.52
  -1  11   4   58.96   35.84
  -1  11   4   13.62   33.14
  -1 -11   4   11.06    8.68
  -1  11   3  268.00   56.89
  -1  11   3  301.17   69.23
  -1  11   3  503.13  104.40
   1  11  -3  357.64   63.62
  -1 -11   3  289.66   23.25
   1  11  -2  663.32   18.56
  -1  11   2  723.69   46.66
  -1  11   2  758.99   83.13
   1  11  -2  676.98   51.94
  -1  11   2  727.08  155.46
  -1  11   1  528.24   58.01
   1  11  -1  433.34   20.74
   1  11  -1  441.80   30.95
  -1  11   1  558.96   66.82
   1  11  -1  490.27  143.77
  -1  11   1  617.26  150.57
  -1  11   0 9080.78  183.73
   1  11   0 9446.28  188.72
  -1  11   0 9522.24  195.36
   1  11   0 9646.90  194.01
  -1  11   0 9879.46  241.28
   1  11   0 9536.27  211.97
   1  11   1  866.76   24.05
  -1  11  -1  864.83   29.86
   1  11   1  833.47   42.37
   1  11   1  870.14  173.55
  -1  11  -1  998.30   85.81
   1 -11   1  806.45   23.39
   1  11   2  119.11   25.41
  -1  11  -2  141.77   21.82
   1  11   2  122.18   36.07
   1  11   2  119.12   37.34
  -1  11  -2  104.24   53.13
   1 -11   2  102.15   24.00
   1  11   3 2721.57   84.82
  -1  11  -3 2796.33   79.91
  -1  11  -3 2646.65  100.45
   1  11   3 2754.41   93.10
   1  11   3 2717.02  187.34
   1 -11   3 2440.74   75.65
   1  11   4 3857.83  149.11
  -1  11  -4 3959.54  108.84
  -1  11  -4 4043.81  131.54
   1  11   4 3927.02  115.51
   1  11   4 4144.84  171.45
   1 -11   4 3592.35   49.50
  -1  11  -5  577.40   35.17
  -1  11  -5  571.62  135.59
   1  11   5  604.02   43.03
   1  11   5  633.18  119.08
   1 -11   5  487.73   48.71
  -1  11  -6  771.45   33.57
  -1  11  -6  611.20  164.27
   1  11   6  813.68   62.13
   1  11   6  805.51   63.11
   1 -11   6  724.39   38.71
   1  11   7  416.92  111.71
  -1  11  -7  375.44   86.19
  -1  11  -7  309.78   94.62
  -1 -11  -7  396.43   81.28
   1 -11   7  288.14   71.91
   1  11   8   84.35   51.85
  -1  11  -8   30.80   17.26
  -1  11  -8    9.59   20.32
  -1 -11  -8   55.07   37.00
   1 -11   8   17.45   13.94
  -1  11  -9   22.08   47.10
  -1  11  -9   17.67   11.54
   1  11   9  100.52   40.93
  -1 -11  -9    7.12   25.53
  -1  11 -10 2676.71  133.11
  -1  11 -10 2824.77   87.37
   1  11  10 3013.66  121.68
  -1 -11 -10 2911.46  127.34
  -1  11 -11  601.67   93.08
  -1  11 -11  577.53   74.80
   1  11  11  687.01  248.32
  -1 -11 -11  662.62  149.38
  -1  11 -12  808.08  182.42
  -1  11 -12  864.71   47.21
   1  11  12  791.02  190.52
  -1 -11 -12  678.99  120.53
  -1  11 -13   86.60   45.38
  -1  11 -13   10.32   15.50
   1  11  13   36.01   45.76
  -1 -11 -13  -14.86   45.41
   1  11  14  119.19   43.24
  -1  11 -14  103.42   31.05
  -1 -11 -14   73.25   47.95
   1 -11  14  103.28   36.51
   1  11  15  126.15   61.24
  -1  11 -15  107.84   44.55
  -1 -11 -15  176.97   89.80
   1 -11  15  135.37   49.73
   1  11  16  208.45   40.08
  -1  11 -16  198.17   40.35
  -1 -11 -16  183.03   79.68
   1 -11  16  185.60   57.14
   1  11  17   53.77   34.43
  -1  11 -17   88.66   43.24
  -1 -11 -17   87.38   68.53
   1 -11  17   48.18   48.24
   1  11  18  -28.90   60.60
  -1  11 -18   26.30   18.31
  -1 -11 -18  108.45   62.97
   1 -11  18   65.51   51.53
   1  11  19   20.60   36.96
   1  11  19   66.71   48.19
   1 -11  19   67.92   33.99
   1  11  20  215.20   90.38
   1 -11  20  159.44   61.85
   1 -11  21   50.27   34.43
  -1 -13  20   20.32   19.51
  -1  13  19   90.26   54.87
  -1  13  19   81.25   63.22
  -1 -13  19  110.78   56.71
  -1  13  18   14.35   23.93
  -1  13  18   37.02   32.18
  -1 -13  18   24.25   32.86
  -1  13  17  200.83   94.18
  -1  13  17  111.68   63.44
  -1 -13  17  148.05   69.62
  -1  13  16  161.91   68.53
  -1  13  16  228.04   81.35
  -1 -13  16  254.28   77.44
  -1  13  15   82.01   61.62
  -1  13  15   61.06   35.40
   1  13 -14   76.17   22.25
  -1  13  14   63.22   34.33
   1  13 -14  122.43   42.45
  -1  13  14  177.70   82.67
   1  13 -13 1338.13   87.19
  -1  13  13 1222.29  113.91
   1  13 -13 1256.17  108.95
  -1  13  13 1551.66  162.17
   1  13 -12   31.84   20.14
  -1  13  12   26.94   36.88
   1  13 -12   73.03   48.62
  -1  13  12  113.31   79.11
   1  13 -11   46.71   28.33
  -1  13  11   96.05   37.41
   1  13 -11   16.03   25.34
  -1  13  11   74.65   69.98
   1  13 -10    7.28   16.26
  -1  13  10   59.54   59.69
   1  13 -10   54.45   36.83
  -1  13  10   17.97   48.90
   1  13  -9  305.60   67.06
  -1  13   9  273.53   84.84
   1  13  -9  379.86   83.74
  -1  13   9  190.70   54.80
   1  13  -8  822.07   29.81
  -1  13   8  763.45  105.83
   1  13  -8  763.91  176.54
  -1  13   8  885.03  138.93
   1  13  -7 2777.47   39.70
   1  13  -7 2824.16  157.53
  -1  13   7 3000.50   64.97
  -1  13   7 3213.56   94.38
  -1 -13   7 2762.98   34.54
   1  13  -6  558.88   34.90
   1  13  -6  588.76  149.43
  -1  13   6  504.06   58.52
  -1  13   6  529.51  159.04
  -1 -13   6  467.50   33.63
   1  13  -5   70.56   39.05
  -1  13   5   36.10   18.37
  -1  13   5   57.65   40.36
  -1 -13   5   49.75   11.04
  -1  13   4  432.92   46.71
   1  13  -4  335.35   96.34
  -1  13   4  464.66   68.15
  -1  13   3  200.89   41.25
  -1  13   3  232.62   44.98
   1  13  -3  171.53   74.44
  -1  13   3  178.75  102.30
  -1  13   2 1385.74   32.61
   1  13  -2 1393.56   10.74
   1  13  -2 1469.51   11.42
  -1  13   2 1536.62   61.08
   1  13  -2 1414.18   61.31
  -1  13   2 1679.58  127.76
  -1  13   1  989.44   36.93
   1  13  -1  914.14   24.25
  -1  13   1  973.08   41.00
   1  13  -1  998.72  199.90
  -1  13   1  970.53  126.61
  -1  13   011627.24  145.16
   1  13   012293.27  153.58
  -1  13   012436.79  168.28
   1  13   012451.46  152.86
  -1  13   012663.62  272.15
   1  13   012939.84  192.11
  -1  13  -1 2114.59   59.66
   1  13   1 2405.94   50.57
  -1  13  -1 2385.45   35.15
   1  13   1 2331.27   38.85
  -1  13  -1 2452.42   81.99
   1  13   1 2531.92  143.30
   1  13   2 1144.59   27.75
  -1  13  -2 1209.43   41.42
   1  13   2 1079.69   49.78
  -1  13  -2 1277.82  164.66
   1  13   2 1309.43  150.66
   1  13   3 1150.76   32.77
  -1  13  -3 1254.16   27.81
   1  13   3 1195.21   43.68
   1  13   3 1333.79   82.58
  -1  13  -3 1367.66  152.52
   1 -13   3 1057.21   41.37
  -1  13  -4   13.23   10.35
  -1  13  -4   38.55   25.41
   1  13   4   51.71   34.10
   1  13   4   -7.17   34.78
   1 -13   4  -11.87    8.17
  -1  13  -5  368.55   52.93
  -1  13  -5  311.37  138.60
   1  13   5  367.44  100.48
   1  13   5  312.78   82.86
   1 -13   5  316.60   30.39
  -1  13  -6 5615.84  110.22
  -1  13  -6 5201.37  122.47
   1  13   6 5290.58  103.97
   1 -13   6 4932.17   83.07
  -1  13  -7  401.54   77.83
  -1  13  -7  374.72  110.07
   1  13   7  275.75   73.80
   1  13   7  466.47  101.99
   1 -13   7  291.92   39.34
  -1  13  -8  265.35   63.35
   1  13   8  254.04   77.08
  -1  13  -8  209.06   53.20
   1  13   8  386.93   63.81
  -1  13  -9   -3.02   16.90
   1  13   9   31.80   22.54
  -1  13  -9   46.38   23.23
   1  13   9  -58.26   67.10
  -1  13 -10  548.50   66.89
   1  13  10  734.93   70.27
  -1  13 -10  663.43  156.11
   1  13  10  803.37  207.71
  -1  13 -11 1010.46   42.86
   1  13  11 1055.32   67.42
  -1  13 -11 1021.96   92.12
   1  13  11  943.53  305.61
  -1  13 -12   20.91   29.93
   1  13  12   28.27   28.59
  -1  13 -12   92.83   34.61
   1  13  12   11.92   45.70
  -1  13 -13    8.90   28.40
   1  13  13   12.87   31.57
  -1  13 -13   43.58   26.31
   1  13  13   75.89   72.80
  -1  13 -14   30.01   18.53
   1  13  14   -2.69   32.85
  -1  13 -14   42.20   38.74
   1  13  14   68.08   54.85
   1  13  15  248.84   87.24
   1  13  15  241.30   81.85
   1  13  16  452.91  101.80
   1  13  16  322.22  127.38
   1 -13  16  147.90   84.28
   1  13  17   28.68   49.81
   1  13  17   54.37   60.38
   1 -13  17   56.23   49.78
   1  13  18  216.11  107.69
   1  13  18  189.36  124.02
   1 -13  18  148.01   64.44
   1  13  19  111.04   49.26
   1  13  19   90.47   69.72
   1 -13  19   71.55   52.13
   1 -13  20  -34.04   45.88
  -1 -15  19   78.49   17.09
  -1  15  18   47.30   40.75
  -1  15  18   35.89   25.98
  -1 -15  18  -29.27   42.51
  -1  15  17  481.04  150.71
  -1  15  17  396.91  152.52
  -1 -15  17  310.29  106.62
  -1  15  16  386.60  161.22
  -1  15  16  426.63  142.12
  -1  15  15  431.47  122.15
   1  15 -15  359.89  129.53
  -1  15  15  393.23   76.56
  -1  15  14   83.19   57.96
   1  15 -14   32.65   44.72
  -1  15  14  110.24   46.23
  -1  15  13 1725.95   78.20
   1  15 -13 1512.33  156.73
  -1  15  13 1637.07  124.41
  -1  15  12  326.27   77.60
   1  15 -12  449.42   93.78
  -1  15  12  381.93   93.62
  -1  15  11  133.14   39.00
   1  15 -11  228.06   66.12
  -1  15  11  147.44   62.87
  -1  15  10  712.42  105.82
   1  15 -10  737.75  179.00
  -1  15  10  700.29  263.16
  -1  15   9  387.23  104.54
   1  15  -9  465.83   88.25
  -1  15   9  511.32  110.35
  -1  15   8  409.31  126.19
   1  15  -8  182.90   91.07
  -1  15   8  403.40  166.63
  -1  15   7 3111.97   70.08
   1  15  -7 3109.74  221.13
  -1  15   7 3221.04  140.51
  -1  15   6   -8.82   19.84
   1  15  -6 -106.21   53.45
  -1  15   6   45.24   36.75
  -1  15   5 2800.27   88.60
   1  15  -5 2754.76   96.12
  -1  15   5 2886.23   98.92
  -1  15   4 1891.44   63.43
   1  15  -4 1993.15   91.24
  -1  15   4 1736.01   82.12
  -1  15   3 1113.89   42.25
   1  15  -3 1186.84   59.81
  -1  15   3 1215.47   86.16
  -1  15   2  183.35   36.63
  -1  15   2  262.26   48.16
   1  15  -2  273.95   66.37
  -1  15   2  199.01   83.46
  -1  15   1   75.80   29.08
   1  15  -1   73.90   17.90
  -1  15   1   85.78   22.85
   1  15  -1  130.23   60.64
  -1  15   1  127.75   37.26
  -1  15   0 1664.57   53.28
   1  15   0 1741.41   54.70
  -1  15   0 1823.49   59.55
   1  15   0 1764.75   61.42
  -1  15   0 1651.53   98.41
   1  15   0 1844.58  138.48
  -1  15  -1 5482.14  110.88
   1  15   1 5453.67  121.54
  -1  15  -1 5787.17  117.67
   1  15   1 5598.57  116.69
  -1  15  -1 5642.40  146.18
   1  15   1 5682.07  147.91
  -1  15  -2  222.35   37.38
   1  15   2  227.97   46.42
   1  15   2  335.81   58.63
  -1  15  -2  236.73   85.36
   1  15   2  396.54   69.87
  -1  15  -3    8.48    5.22
   1  15   3   23.80   19.05
   1  15   3   22.89   10.49
  -1  15  -3   56.20   45.86
   1  15   3   42.99   39.59
   1  15   4   30.27   11.91
   1  15   4   43.93   49.08
  -1  15  -4  -54.65   53.92
   1 -15   4   20.09    7.70
  -1  15  -5   65.94   19.90
   1  15   5  106.89   35.68
  -1  15  -5   97.04   50.39
   1  15   5  146.62   83.31
  -1  15  -6    8.83    8.41
   1  15   6   48.21   26.23
  -1  15  -6   59.39   47.16
   1  15   6   62.79   48.23
  -1  15  -7  450.93   52.88
   1  15   7  383.20  110.90
  -1  15  -7  474.26   82.31
   1  15   7  462.01  127.08
  -1  15  -8  416.14   55.09
   1  15   8  494.38  137.35
  -1  15  -8  499.20   98.48
   1  15   8  418.07  132.93
   1  15   9   30.69   19.17
  -1  15  -9   30.75   26.33
   1  15   9   99.36   44.60
   1  15  10   14.87   16.60
  -1  15 -10  -16.26   46.77
   1  15  10   10.33   48.15
   1  15  11  190.69   82.75
  -1  15 -11  158.52   65.41
   1  15  11  357.31  100.94
   1  15  12   32.13   24.11
  -1  15 -12  -43.77   53.20
   1  15  12   47.66   45.08
   1  15  13   18.86   24.37
  -1  15 -13  -60.61   48.07
   1  15  13  128.53   73.49
   1  15  14 1285.68  141.87
  -1  15 -14  840.21  227.92
   1  15  14 1252.31  116.06
   1  15  15  -26.57   49.62
  -1  15 -15    2.08   48.27
   1  15  15  141.41   79.93
   1  15  16  325.19  163.76
   1  15  16  443.49  183.56
   1 -15  16  448.01  120.46
   1  15  17   13.91   39.13
   1  15  17  105.82   52.47
   1 -15  17   29.19   42.37
   1  15  18   50.96   59.76
   1  15  18   78.98   57.30
   1 -15  18   78.60   44.91
  -1 -17  18   29.35   29.62
  -1  17  17   18.02   30.96
  -1 -17  17   62.05   29.30
  -1  17  16   37.26   34.27
   1  17 -16    8.52   35.43
  -1  17  16   34.22   40.25
  -1  17  15   21.40   33.25
   1  17 -15   38.10   26.02
  -1  17  15  127.92   73.29
  -1  17  14   66.86   31.25
   1  17 -14   -3.32   31.13
  -1  17  14   24.19   53.04
  -1  17  13  214.40   59.88
   1  17 -13  361.77   75.92
  -1  17  13  275.72   68.21
  -1  17  12   17.47   18.94
   1  17 -12   30.91   32.95
  -1  17  12  -26.14   61.55
  -1  17  11   90.15   36.76
   1  17 -11  163.99   45.47
  -1  17  11  106.24   44.75
  -1  17  10  714.96   73.89
   1  17 -10  693.14  134.48
  -1  17  10  713.79  225.82
  -1  17   9 1100.66   92.52
   1  17  -9 1229.59  101.90
  -1  17   9 1320.99  161.75
  -1  17   8   30.92   15.57
   1  17  -8   62.04   34.83
  -1  17   8   73.09   48.21
  -1  17   7  239.52   58.03
   1  17  -7  308.89   70.30
  -1  17   7  356.62   85.25
  -1  17   6   32.11   31.46
   1  17  -6   38.15   38.59
  -1  17   6   49.57   73.16
  -1  17   5  126.49   46.55
   1  17  -5  120.17   34.87
  -1  17   5  106.34   75.72
  -1  17   4   12.81   16.56
   1  17  -4   37.23   30.62
  -1  17   4   29.77   48.39
  -1  17   3   33.02   21.28
   1  17  -3   -0.28   51.26
  -1  17   3   48.01   78.97
  -1  17   2   32.28   15.79
   1  17  -2   91.56   46.05
  -1  17   2   61.26   46.44
  -1  17   1 1663.59   33.57
   1  17  -1 1710.21  140.40
  -1  17   1 1759.68  129.33
  -1  17   0   25.60   17.09
  -1  17   0   73.03   51.74
   1  17   0   16.35   27.25
   1  17   1   35.26   17.05
  -1  17  -1   71.20   28.92
   1  17   1  -21.88   60.47
   1  17   2   13.04   12.13
  -1  17  -2   85.58   42.36
   1  17   2   72.71   58.43
   1  17   3  187.33   45.21
  -1  17  -3   65.19   38.18
   1  17   3  198.07   95.40
   1  17   4  526.80  102.53
  -1  17  -4  479.28  145.02
   1  17   4  627.00  218.16
   1  17   5  848.17   44.17
  -1  17  -5  762.86  196.63
   1  17   5  872.66  247.25
   1  17   6 3910.27   70.82
  -1  17  -6 3909.29  139.82
   1  17   6 3725.59  245.60
   1  17   7  442.23  131.78
  -1  17  -7  502.31  108.56
   1  17   7  576.53  188.03
   1  17   8   35.13   13.55
  -1  17  -8    9.58   16.93
   1  17   8   53.29   43.52
   1  17   9  798.00   74.78
  -1  17  -9  668.51  132.82
   1  17   9  866.61  211.31
   1  17  10  224.75   90.27
  -1  17 -10  414.02   71.03
   1  17  10  415.24  117.55
   1  17  11   36.53   37.43
  -1  17 -11   48.62   44.05
   1  17  11  -84.06   66.76
   1  17  12  469.84  126.08
  -1  17 -12  468.28   90.61
   1  17  12  426.14  128.52
   1  17  13  213.02   84.46
  -1  17 -13  291.59   84.82
   1  17  13  366.09   90.12
   1  17  14  -30.60   39.48
  -1  17 -14   86.55   41.03
   1  17  14  -27.74   64.71
   1  17  15  237.84  100.95
  -1  17 -15  411.96  173.95
   1  17  15  206.82   97.62
   1  17  16   14.59   23.78
  -1  17 -16   -0.79   52.95
   1  17  16   78.74   70.19
   1  17  17   51.06   40.36
   1 -17  17   42.70   55.70
  -1  19  17  205.44   42.99
  -1  19  16   54.03   37.80
   1  19 -16  125.58   49.25
  -1  19  15  141.97   70.80
   1  19 -15   53.47   25.56
  -1  19  15  266.05  111.67
  -1  19  14  420.56  177.33
   1  19 -14  403.34  167.91
  -1  19  14  630.31  181.05
  -1  19  13  137.89   42.24
   1  19 -13  155.33   48.27
  -1  19  13   38.84   38.79
  -1  19  12  175.60   46.28
   1  19 -12  143.54   49.47
  -1  19  12  242.64   99.27
  -1  19  11   69.43   17.96
   1  19 -11  320.56  102.15
  -1  19  11  326.81   87.38
  -1  19  10  265.26   88.50
   1  19 -10  310.18   78.03
  -1  19  10  264.40   97.05
  -1  19   9   81.88   31.88
   1  19  -9  125.68   51.09
  -1  19   9  238.76   64.55
  -1  19   8   36.58   24.49
   1  19  -8  101.98   29.89
  -1  19   8   97.23   50.96
  -1  19   7    5.61   20.40
   1  19  -7   11.88   24.95
  -1  19   7  -14.96   65.12
  -1  19   6   30.99   25.40
   1  19  -6   56.68   26.32
  -1  19   6   16.94   76.88
   1  19  -5   40.89   34.08
  -1  19   5   52.62   44.51
   1  19  -4 1306.76  104.12
  -1  19   4 1147.35   89.72
   1  19  -3    7.41   30.18
  -1  19   3   -7.21   41.14
   1  19  -2   42.21   44.15
  -1  19   2   59.27   31.55
   1  19  -1   62.72   42.68
  -1  19   1   36.99   28.96
  -1  19   0 1108.48   78.59
   1  19   0  970.14  237.57
  -1  19  -1  430.06  131.82
   1  19   1  170.49   76.60
  -1  19  -2  383.01  103.68
   1  19   2  559.01  179.59
  -1  19  -3   66.84   45.29
   1  19   3   74.19   39.49
  -1  19  -4  100.52   68.06
   1  19   4   50.78   72.02
  -1  19  -5   44.54   44.75
   1  19   5   46.23   80.12
  -1  19  -6 1899.30  139.87
   1  19   6 2154.83  208.71
   1  19   7  458.80  120.57
  -1  19  -7  504.67  208.10
   1  19   7  254.42   95.06
   1  19   8    1.82   14.33
  -1  19  -8   85.58   52.62
   1  19   8  129.65   73.00
   1  19   9   22.41   34.91
  -1  19  -9  113.39   57.00
   1  19   9   67.44   97.92
   1  19  10   46.98   22.34
  -1  19 -10  -16.51   49.18
   1  19  10  105.81   74.86
   1  19  11   26.72   20.06
  -1  19 -11   28.51   35.08
   1  19  11   52.30   38.07
   1  19  12   61.79   39.36
  -1  19 -12  102.69   42.80
   1  19  12   83.99   52.25
   1  19  13  558.40   79.45
  -1  19 -13  754.78  122.47
   1  19  13  606.66  197.46
   1  19  14  144.96   52.45
  -1  19 -14  192.25   76.95
   1  19  14   94.73   49.44
   1  19  15  109.51   37.82
  -1  19 -15   70.83   47.19
   1  19  16   42.10   40.66
   1  21 -14 1118.55  113.50
   1  21 -13   33.95   35.11
   1  21 -12   38.30   23.28
  -1  21  12  159.61   63.17
   1  21 -11   40.37   38.30
  -1  21  11   59.12   56.28
   1  21 -10   57.63   30.92
  -1  21  10   65.74   45.72
   1  21  -9   33.70   37.76
  -1  21   9   53.35   63.63
   1  21  -8  145.88   76.07
  -1  21   8  174.85   79.75
   1  21  -7  105.30   39.16
  -1  21   7  232.51   98.32
   1  21  -6  320.26   98.94
  -1  21   6  240.28   87.97
   1  21  -5  190.14   40.75
  -1  21   5  328.90   76.38
   1  21  -4   58.63   39.73
  -1  21   4  191.43   81.16
   1  21  -3  -40.21   56.74
  -1  21   3   93.70   33.47
   1  21  -2   62.00   60.62
  -1  21   2   63.73   43.46
   1  21  -1   82.09   51.71
  -1  21   1    5.03   68.90
  -1  21   0  148.88   60.07
   1  21   0  203.09  100.24
  -1  21  -1   62.47   50.08
   1  21   1  -24.73   70.46
  -1  21  -2  407.15   99.09
   1  21   2  243.79  104.89
  -1  21  -3   62.84   47.60
   1  21   3    9.87   51.78
  -1  21  -4  449.16  173.60
   1  21   4  457.75  185.67
  -1  21  -5   39.85   37.46
   1  21   5   73.96   58.44
  -1  21  -6  283.86   97.47
   1  21   6  353.22  110.03
  -1  21  -7  274.61   76.07
   1  21   7  317.80   90.66
  -1  21  -8   58.32   37.09
   1  21   8  -19.46   54.76
  -1  21  -9  122.15   59.13
   1  21   9 -136.88   60.80
  -1  21 -10   60.21   29.26
   1  21  10   91.55   36.36
  -1  21 -11   87.86   30.60
   1  21  11  123.83   56.98
  -1  21 -12   81.09   52.70
   1  21  12   61.17   36.46
  -1  21 -13  336.14   58.73
   1  23 -11   46.52   32.36
   1  23 -10  129.09   62.82
   1  23  -9  -19.47   44.43
  -1  23   9   45.91   45.02
   1  23  -8   31.49   32.96
  -1  23   8   56.40   40.09
   1  23  -7   97.40   41.09
  -1  23   7   75.65   35.57
   1  23  -6  466.62   69.33
  -1  23   6  362.24  126.06
   1  23  -5   57.69   32.84
  -1  23   5  -67.97   56.31
   1  23  -4  108.64   66.47
  -1  23   4   57.98   34.96
   1  23  -3   30.41   59.54
  -1  23   3   95.61   60.02
   1  23  -2   43.25   64.76
  -1  23   2  162.80   91.83
   1  23  -1  -39.65   64.77
  -1  23   1   60.62   40.17
  -1  23   0  113.75   60.53
   1  23   0   78.76   55.92
  -1  23  -1   52.86   48.48
   1  23   1   80.96   62.44
  -1  23  -2  119.05   82.37
   1  23   2  140.93   70.14
  -1  23  -3  305.99  121.19
   1  23   3  162.76   79.87
  -1  23  -4   -4.12   62.70
   1  23   4   66.88   66.27
  -1  23  -5  128.00   54.14
   1  23   5   92.25   50.05
  -1  23  -6  156.88   42.72
   1  23   6  131.87   45.28
  -1  23  -7  629.08  115.30
   1  23   7  551.97  264.02
  -1  23  -8  391.10   96.83
   1  23   8  282.44  178.41
  -1  23  -9  102.08   54.03
   1  23   9  102.63   51.92
  -1  23 -10  108.29   61.01
   1  25  -6   49.81   41.65
   1  25  -5  876.34  192.48
   1  25  -4  174.68   56.80
  -1  25   4   85.91   49.26
   1  25  -3   33.62   54.20
  -1  25   3   83.71   50.41
   1  25  -2   40.69   51.35
  -1  25   2   37.11   36.13
   1  25  -1  -19.79   55.73
  -1  25   1   -3.27   59.54
  -1  25   0   96.37   62.86
   1  25   0  136.91   64.47
  -1  25  -1   59.98   52.73
   1  25   1   77.36   67.88
  -1  25  -2  155.98  107.21
   1  25   2  292.74   99.14
  -1  25  -3   48.62   33.08
   1  25   3   91.62   59.59
  -1  25  -4  153.21   61.59
  -1  25  -5  203.63   56.16
  -2   0  23   34.71   37.82
   2   0 -22   -6.46   56.90
  -2   0  22  -14.52   47.74
   2   0 -21   73.70   64.94
  -2   0  21  -63.31   51.61
   2   0 -20   98.97   58.25
  -2   0  20   33.16   63.94
   2   0 -19  -67.07   58.97
  -2   0  19  -44.04   53.59
   2   0 -18  697.05  179.63
  -2   0  18  748.52   80.03
   2   0 -17  -22.76   57.44
  -2   0  17   61.73   25.28
   2   0 -16 1786.25  132.58
  -2   0  16 1787.47  136.03
   2   0 -15   46.80   43.03
  -2   0  15   30.55   29.09
   2   0 -14   46.24   29.38
  -2   0  14   -0.13   37.23
   2   0 -13   34.44   49.33
  -2   0  13   18.93   43.07
   2   0 -12 3650.48   91.37
  -2   0  12 3808.45  125.51
   2   0 -11   -6.17   41.90
  -2   0  11   53.99   33.86
   2   0 -10 3255.66  107.51
  -2   0  10 3267.64  102.15
   2   0  -9   29.57   30.86
  -2   0   9  -36.77   32.80
   2   0  -8 3579.92  119.16
  -2   0   8 3584.45  113.30
   2   0  -8 3349.80  108.40
   2   0  -7  -38.51   39.32
  -2   0   7   22.42   22.77
  -2   0   7  -22.84   33.76
   2   0  -7   12.59   16.24
   2   0  -6 8634.64  177.57
  -2   0   6 8209.55  167.05
  -2   0   6 8615.02  177.90
   2   0  -6 8308.16  168.27
   2   0  -5   70.46   39.89
  -2   0   5   43.13   34.53
  -2   0   5   69.25   32.36
   2   0  -5   53.03   24.65
  -2   0   413417.60  101.78
  -2   0   413549.97  100.71
   2   0  -412998.10   60.80
   2   0  -3   35.35   22.01
  -2   0   3   15.21   21.67
  -2   0   3   54.15   27.69
   2   0  -3   43.21   22.30
   2   0  -2   75.10   28.45
  -2   0  -1   -6.75   13.88
   2   0   1   11.80    8.70
   2   0   261712.43  364.74
  -2   0  -3   38.77   22.58
   2   0   3    8.57   21.49
   2   0   3   56.66   39.27
  -2   0  -3   -0.56   24.41
  -2   0  -4 2922.87  148.14
   2   0   4 2819.72   78.45
   2   0   4 3025.69  155.01
  -2   0  -4 2668.89   75.19
  -2   0  -5   29.63   29.82
   2   0   5   31.64   30.63
   2   0   5   41.26   44.41
  -2   0  -5    5.50   21.07
  -2   0  -6  464.67  138.09
   2   0   6  439.80   31.71
   2   0   6  529.09   54.20
  -2   0  -6  467.86   87.48
  -2   0  -7    9.61   21.08
   2   0   7   -1.59   36.18
  -2   0  -7   37.77   20.85
  -2   0  -8  404.45  130.04
   2   0   8  451.27  105.95
  -2   0  -9  -28.78   41.92
   2   0   9   15.64   20.51
  -2   0 -10 1676.27   89.32
   2   0  10 1892.46   74.99
  -2   0 -11   10.47   31.03
   2   0  11  -15.12   49.33
  -2   0 -12   36.28   37.88
   2   0  12   -6.72   54.01
  -2   0 -13  -16.08   43.44
   2   0  13   12.57   37.04
  -2   0 -14 2947.59   94.69
   2   0  14 3241.26  220.40
  -2   0 -15   56.62   34.92
   2   0  15    2.49   26.00
  -2   0 -16   81.96   34.13
   2   0  16   -4.97   27.27
  -2   0 -17   89.66   34.65
   2   0  17  -19.73   45.15
  -2   0 -18 1346.53  138.50
   2   0  18 1360.98  148.40
  -2   0 -19   65.64   31.03
   2   0  19  120.43   68.74
  -2   0 -20  411.05  173.38
   2   0  20  527.98  177.97
  -2   0 -21   -8.34   59.90
   2   0  21   37.66   29.64
  -2   0 -22  -27.85   57.14
   2   0  22   63.39   57.86
  -2   2  23   54.74   51.56
  -2  -2  23  102.26   56.16
  -2   2  22   70.60   41.63
   2   2 -22  105.33   50.63
   2  -2 -22   65.12   53.83
  -2  -2  22  156.15   72.84
  -2   2  21   61.95   38.40
   2   2 -21    0.15   34.61
   2  -2 -21   88.91   68.19
  -2  -2  21   40.48   24.44
  -2   2  20   97.16   77.14
   2   2 -20  122.75   36.89
   2  -2 -20   69.27   39.55
  -2  -2  20   87.74   54.76
  -2   2  19   28.07   26.07
   2   2 -19   -8.06   51.67
   2  -2 -19   35.03   30.10
  -2  -2  19   28.12   40.71
  -2   2  18  180.20   70.33
   2   2 -18  285.34   66.21
   2  -2 -18  284.20   95.10
  -2  -2  18   71.30   50.89
  -2   2  17  677.85  207.71
   2   2 -17  632.99  220.74
   2  -2 -17  586.38  163.63
  -2  -2  17  789.87   82.86
  -2   2  16  952.85   90.45
   2   2 -16  746.78  171.44
   2  -2 -16  870.33   93.16
  -2  -2  16  653.02  160.21
  -2   2  15  264.54   79.08
   2   2 -15  434.49   76.05
   2  -2 -15  397.39   81.58
  -2  -2  15  346.92   66.66
  -2   2  14   54.13   29.51
   2   2 -14   41.24   36.23
   2  -2 -14   30.82   41.98
  -2  -2  14   63.26   47.32
  -2   2  13 5301.91  313.57
   2   2 -13 4923.41  113.93
   2  -2 -13 4737.03  174.31
  -2  -2  13 4994.68  161.96
  -2   2  12  433.49  150.58
   2   2 -12  359.04  104.22
   2  -2 -12  397.09   90.60
  -2  -2  12  421.97   54.75
  -2   2  11   33.46   25.94
   2   2 -11   17.81   26.69
   2  -2 -11  -20.11   48.46
  -2  -2  11   26.06   38.57
  -2   2  10  296.28   47.12
   2   2 -10  269.75   91.41
   2  -2 -10  240.70   53.42
  -2  -2  10  346.10   78.00
  -2   2   9  630.36  141.75
   2   2  -9  431.85  130.09
   2  -2  -9  461.83  121.01
  -2  -2   9  461.94   42.01
   2   2  -8 5938.16  154.41
  -2   2   8 6118.16  157.44
   2  -2  -8 6308.02  221.81
  -2  -2   8 5519.33  137.68
  -2  -2   8 5489.47  173.88
  -2   2   713296.61  191.07
  -2  -2   711974.36  182.36
  -2  -2   713016.52  182.62
   2  -2  -712725.34  180.05
  -2  -2   712882.10  197.01
  -2   2   6 6060.33  130.26
   2  -2  -6 5729.36  139.20
  -2  -2   6 5261.97  133.78
  -2  -2   6 5567.84  132.54
   2  -2  -6 5759.41  147.83
  -2  -2   6 5575.43   57.91
  -2   2   5  351.47   92.31
   2   2  -5  448.76  107.97
  -2   2   5  288.36   80.01
  -2  -2   5  294.52   37.72
  -2  -2   5  276.00   50.19
   2  -2  -5  310.85   96.42
   2  -2  -5  352.46   69.43
  -2   2   415775.48  115.93
   2   2  -415376.15  110.11
   2   2  -415240.20  110.07
  -2  -2   415915.75  112.98
   2  -2  -415333.15  134.69
  -2  -2   414777.48  118.78
   2  -2  -416221.94  141.00
   2   2  -3 5295.11   55.17
  -2   2   3 5092.43  133.85
   2   2  -3 5352.53   49.85
  -2   2   3 5428.12  130.46
  -2  -2   3 5234.80  121.93
  -2  -2   3 4954.29  118.88
   2  -2  -3 5162.31  126.99
   2  -2  -3 5280.11  126.91
  -2   2   2 1503.15   54.67
   2   2  -2 1598.63   51.64
   2   2  -2 1605.72   99.06
  -2   2   2 1603.19   88.20
  -2   2   2 1629.75   80.30
  -2  -2   2 1589.72   54.78
  -2  -2   2 1671.21   53.01
   2  -2  -2 1732.90   64.16
   2  -2  -1  114.27   40.88
  -2   2  -2   57.43   28.98
   2   2   2   32.58   18.73
  -2   2  -2   43.20   28.14
   2   2   2   72.83   37.96
   2  -2   2   19.26   23.06
   2  -2   2    9.98   17.12
  -2  -2  -2   38.78   22.55
  -2  -2  -2   56.79   24.55
   2   2   315470.63  108.25
  -2   2  -315735.18  110.33
  -2   2  -314873.49  112.75
   2  -2   315636.23  106.64
   2  -2   314519.30  143.89
  -2   2  -4  559.39   51.82
   2   2   4  439.03   27.41
  -2   2  -4  546.80  112.78
   2   2   4  599.57  109.79
   2  -2   4  642.18   73.58
   2  -2   4  500.24   35.81
  -2  -2  -4  519.69   45.04
  -2  -2  -4  572.84  112.91
   2   2   5  202.94   58.82
  -2   2  -5  243.35   62.10
   2   2   5  169.82   54.39
   2  -2   5  217.77   54.33
   2  -2   5  219.46   48.07
  -2  -2  -5  166.16   51.12
  -2  -2  -5  254.16   30.47
   2  -2   5  250.73   47.07
   2   2   6  122.05   40.33
  -2   2  -6  324.86  139.77
   2   2   6  204.37   42.87
   2  -2   6  221.61   66.77
   2  -2   6  257.25   49.75
  -2  -2  -6  189.48   54.62
  -2  -2  -6  176.06   32.10
   2  -2   6  287.32   56.29
   2   2   7 9366.39  146.43
  -2   2  -7 9922.54  152.55
  -2  -2  -7 9495.86  150.60
   2  -2   7 9164.37  143.77
   2   2   8 1623.77  148.94
  -2   2  -8 1433.12  152.51
  -2  -2  -8 1775.49   78.96
   2  -2   8 1631.43  112.13
   2   2   9  644.10  129.06
  -2   2  -9  602.50  148.22
  -2  -2  -9  505.27  134.32
   2  -2   9  575.94  125.69
   2   2  10 1029.35   72.34
  -2   2 -10  865.08   64.37
  -2  -2 -10  995.26  103.62
   2  -2  10  884.80  150.20
   2   2  11 3781.24  168.30
  -2   2 -11 3422.54  162.09
  -2  -2 -11 3573.62   96.59
   2  -2  11 3479.47   98.96
   2   2  12   44.32   23.50
  -2   2 -12   51.39   32.76
  -2  -2 -12   47.63   35.52
   2  -2  12  125.67   66.03
   2   2  13 2492.98   94.08
  -2   2 -13 2020.42   79.01
  -2  -2 -13 2117.55   92.67
   2  -2  13 2122.17  135.16
   2   2  14 5909.08  117.12
  -2   2 -14 5312.45  104.32
  -2  -2 -14 5504.19  120.06
   2  -2  14 5553.32  236.56
   2   2  15  233.82   68.18
  -2   2 -15  274.70   80.84
  -2  -2 -15  234.37   60.91
   2  -2  15  286.62   68.88
   2   2  16  180.45   68.13
  -2   2 -16  132.86   41.72
  -2  -2 -16  173.25   52.76
   2  -2  16  161.80   63.70
   2   2  17   57.52   38.56
  -2   2 -17   19.46   32.98
  -2  -2 -17   39.65   36.53
   2  -2  17    9.34   24.95
   2   2  18  930.17  130.68
  -2   2 -18 1215.90  151.48
  -2  -2 -18 1098.48  313.18
   2  -2  18 1348.98  139.47
   2   2  19   71.47   44.05
  -2   2 -19  122.33   51.05
  -2  -2 -19  185.91   51.22
   2  -2  19   68.03   50.58
   2   2  20   79.14   40.99
  -2   2 -20   34.41   29.30
  -2  -2 -20   32.82   42.34
   2  -2  20    9.52   41.05
   2   2  21 1341.38  212.59
  -2   2 -21 1229.75  188.94
  -2  -2 -21 1354.17   86.28
   2  -2  21  932.04  249.06
  -2   2 -22   71.95   38.37
   2   2  22   48.81   44.54
   2  -2  22   48.30   51.84
  -2   4  23 1103.28  152.21
  -2  -4  23  572.70  199.58
   2   4 -22  411.53  143.04
  -2   4  22  393.61  149.79
  -2  -4  22  351.18  155.27
   2   4 -21  278.22   74.06
  -2   4  21  262.76  139.84
  -2  -4  21  140.24   56.15
  -2   4  20   49.66   51.70
   2   4 -20   34.61   50.57
   2  -4 -20  -21.11   56.19
  -2  -4  20   22.22   54.69
  -2   4  19  -17.46   57.22
   2   4 -19   16.69   37.42
   2  -4 -19   74.39   55.77
  -2  -4  19   63.25   62.79
  -2   4  18   65.66   50.11
   2   4 -18   76.24   37.83
   2  -4 -18   -3.75   51.76
  -2  -4  18  -12.90   43.22
  -2   4  17  127.09   68.50
   2   4 -17  -14.06   55.88
   2  -4 -17   58.39   55.32
  -2  -4  17   13.14   26.92
  -2   4  16   62.28   35.71
   2   4 -16   44.79   55.11
   2  -4 -16   38.37   40.02
  -2  -4  16  168.24   39.70
  -2   4  15  158.49   46.00
   2   4 -15  174.16   87.60
   2  -4 -15  239.62   98.69
  -2  -4  15  101.40   52.76
  -2   4  14  518.86  112.31
   2   4 -14  481.92  142.39
   2  -4 -14  270.53   78.60
  -2  -4  14  350.89   66.26
  -2   4  13 1900.24  160.54
   2   4 -13 1330.64  137.87
   2  -4 -13 1636.77   77.10
  -2  -4  13 1649.44   95.31
  -2   4  12  456.98  132.39
   2   4 -12  528.45   72.23
   2  -4 -12  618.72  103.98
  -2  -4  12  551.72  133.14
  -2   4  11 1783.29   95.17
   2   4 -11 1766.27   69.23
   2  -4 -11 1731.52  116.47
  -2  -4  11 1829.17  132.74
  -2   4  10 1307.76   76.19
   2   4 -10 1185.69  126.91
   2  -4 -10 1192.47   58.06
  -2  -4  10 1480.28  181.58
  -2   4   9 1982.74   83.31
   2   4  -9 1918.92  131.61
   2  -4  -9 1860.71   75.73
  -2  -4   9 1657.56  119.33
   2   4  -8 4921.48  125.82
  -2   4   8 4603.84  171.30
   2  -4  -8 4516.74  115.41
  -2  -4   8 4557.95  112.01
  -2   4   7  463.48  106.82
   2   4  -7  381.95  110.66
   2   4  -7  445.54  102.10
  -2  -4   7  288.82   79.78
  -2  -4   7  318.30   77.09
   2  -4  -7  399.32  118.59
  -2   4   6 8207.84  125.99
   2   4  -6 8627.60  131.35
   2   4  -6 8342.63  129.04
  -2   4   6 8760.88  135.37
  -2  -4   6 8444.50  121.74
  -2  -4   6 7614.85  115.56
   2  -4  -6 8313.39  132.80
   2  -4  -6 8560.75  130.58
   2   4  -5  537.94   78.27
  -2   4   5  437.35  100.92
   2   4  -5  421.62  118.99
  -2   4   5  567.86  151.41
  -2  -4   5  465.95   26.46
  -2  -4   5  463.02   30.84
   2  -4  -5  532.85  103.61
   2  -4  -5  513.89   42.33
   2   4  -4  288.46   73.24
  -2   4   4  220.84   58.58
   2   4  -4  225.18   56.05
  -2   4   4  282.09   60.18
  -2  -4   4  254.86   66.73
  -2  -4   4  261.69   75.53
   2  -4  -4  338.26   86.00
   2  -4  -4  227.23   48.39
  -2   4   314797.78  106.11
   2   4  -315254.07  111.44
  -2   4   315033.63  140.13
  -2   4   315926.90  122.70
  -2  -4   315098.06  108.57
  -2  -4   315778.61   98.67
   2  -4  -315755.92  117.11
  -2   4   2 8304.74  165.65
   2   4  -2 8592.17  169.02
   2   4  -2 8858.50  175.86
  -2   4   2 8765.83  199.94
  -2   4   2 9008.90  180.88
  -2  -4   2 8529.69  169.00
  -2  -4   2 9344.59  176.17
   2  -4  -2 8802.93  175.30
  -2   4   1 3971.88   95.66
  -2   4   1 4412.47  112.83
   2   4  -1 4073.24  103.53
   2  -4  -1 3969.41   93.73
  -2  -4   1 3970.92   97.81
   2  -4  -1 4195.54  102.65
  -2   4   0 4535.84  107.14
   2   4   0 4942.95  112.08
  -2   4   0 4634.33  117.15
   2   4   0 4681.51  115.43
   2  -4   0 4333.19  101.19
   2  -4   0 4543.10  123.48
  -2  -4   0 4646.53  106.49
  -2  -4   0 4829.72  117.10
  -2   4  -1 3820.06   92.10
   2   4   1 3836.86   93.01
  -2   4  -1 3364.39   92.20
   2   4   1 3823.14  118.87
   2  -4   1 3515.82   83.59
   2  -4   1 3583.09   91.70
  -2  -4  -1 3651.73   97.37
  -2  -4  -1 3811.77  102.76
  -2   4  -2 7686.91  151.32
   2   4   2 7458.47  149.82
  -2   4  -2 7294.15  170.38
   2   4   2 7635.63  210.72
   2  -4   2 7358.09  143.67
   2  -4   2 7080.96  144.33
  -2  -4  -2 7213.89  143.47
  -2  -4  -2 7317.84  162.35
   2   4   3 5167.68  123.91
  -2   4  -3 5288.24   59.77
  -2  -4  -3 5018.25  123.87
   2  -4   3 5148.75  122.66
   2  -4   3 4771.18  121.52
  -2  -4  -3 4993.90  132.97
  -2   4  -412522.98  242.92
   2   4   411559.57  228.88
  -2   4  -411609.67  232.05
   2   4   412099.41  243.97
   2  -4   411934.67  238.84
   2  -4   411150.86  251.28
  -2  -4  -411637.76  230.73
  -2  -4  -411622.21  229.93
  -2   4  -5  215.41   66.45
   2   4   5   89.77   63.25
  -2   4  -5   92.91   46.91
   2   4   5   66.63   27.32
   2  -4   5  144.38   32.18
   2  -4   5   98.21   33.00
  -2  -4  -5  111.83   80.21
  -2  -4  -5  163.14   26.66
   2   4   6  627.07   43.19
  -2   4  -6  496.99   85.22
  -2   4  -6  508.32   48.28
   2   4   6  632.16  145.74
   2  -4   6  521.52   67.05
   2  -4   6  493.01  109.89
  -2  -4  -6  562.93   61.44
   2   4   7 1225.90  136.03
  -2   4  -7 1045.29  141.85
  -2   4  -7  904.57   49.83
  -2  -4  -7 1006.38   65.13
   2  -4   7 1065.75   55.44
   2   4   8   62.61   37.11
  -2   4  -8   17.57   31.98
  -2  -4  -8   54.99   18.85
   2  -4   8   46.39   28.74
   2   4   9 5181.47  159.45
  -2   4  -9 5197.61  157.84
  -2  -4  -9 4983.84  153.35
   2  -4   9 4949.40  150.68
   2   4  10  839.84   65.64
  -2   4 -10  866.78  160.27
  -2  -4 -10  734.86  169.60
   2  -4  10  767.82   55.20
   2   4  11  199.31   65.88
  -2   4 -11  121.54   54.95
  -2  -4 -11  183.54   48.30
   2  -4  11  162.06   52.85
   2   4  12 1244.57   88.63
  -2   4 -12 1192.24   66.68
  -2  -4 -12 1169.70   88.29
   2  -4  12 1238.47  171.12
   2   4  13 1501.03   85.91
  -2   4 -13 1400.58  208.87
  -2  -4 -13 1419.00  110.35
   2  -4  13 1372.32  124.51
   2   4  14 2580.79  155.32
  -2   4 -14 2314.39   83.72
  -2  -4 -14 2487.22  197.31
   2  -4  14 2345.82  157.39
   2   4  15  524.66   94.75
  -2   4 -15  357.53   95.43
  -2  -4 -15  451.41  123.15
   2  -4  15  427.51   67.86
   2   4  16  361.00   73.43
  -2   4 -16  299.90   81.38
  -2  -4 -16  134.06   58.73
   2  -4  16  130.81   51.88
   2   4  17 1126.48  123.07
  -2   4 -17 1125.57  232.17
  -2  -4 -17 1137.52  236.06
   2  -4  17  896.12  229.03
   2   4  18  596.77  236.95
  -2   4 -18  859.61  202.59
  -2  -4 -18  642.74  156.86
   2  -4  18  539.78  195.44
   2   4  19  310.43  115.78
  -2   4 -19  417.25   97.81
  -2  -4 -19  388.44  163.29
   2  -4  19  248.25   82.72
   2   4  20  -43.13   59.51
  -2   4 -20   25.14   35.61
  -2  -4 -20   53.62   48.80
   2  -4  20    9.32   30.42
   2   4  21 -132.40   55.89
  -2   4 -21   66.24   39.97
  -2  -4 -21   49.51   32.30
   2  -4  21   26.83   41.22
  -2   4 -22    4.95   28.28
   2   4  22  145.44   65.84
   2  -4  22   75.08   54.69
  -2  -6  23   64.88   28.99
   2   6 -22   37.00   27.95
  -2   6  22  110.03   81.91
  -2  -6  22   42.59   37.76
   2   6 -21   37.48   20.84
  -2   6  21   23.69   63.88
  -2  -6  21   27.61   43.92
  -2   6  20  369.62   92.12
   2   6 -20  293.04  101.65
   2  -6 -20  390.15  103.15
  -2  -6  20  250.37  120.27
  -2   6  19  500.32  128.26
   2   6 -19  398.96  116.97
   2  -6 -19  412.87  169.87
  -2  -6  19  296.76  149.38
  -2   6  18  345.67  139.52
   2   6 -18  228.84   67.30
   2  -6 -18  389.66  120.96
  -2  -6  18  286.24  100.69
  -2   6  17   90.92   59.78
   2   6 -17  116.69   39.07
   2  -6 -17  201.57   49.09
  -2  -6  17   90.56   48.58
  -2   6  16  102.35   22.95
   2   6 -16   78.86   34.05
   2  -6 -16   77.31   67.13
  -2  -6  16   30.76   20.28
  -2   6  15   44.43   27.69
   2   6 -15  169.97   54.37
   2  -6 -15   74.29   41.25
  -2  -6  15  150.88   49.39
  -2   6  14  492.46  151.11
   2   6 -14  408.31   93.53
   2  -6 -14  451.26  106.66
  -2  -6  14  427.65   95.13
  -2   6  13  548.75  182.58
   2   6 -13  709.83   85.73
   2  -6 -13  805.19  170.25
  -2  -6  13  752.66  151.34
  -2   6  12  152.82   93.47
   2   6 -12  129.39   40.42
   2  -6 -12  122.43   44.78
  -2  -6  12  142.86   80.91
  -2   6  11   38.52   23.13
   2   6 -11    9.22   21.72
   2  -6 -11    9.51   20.58
  -2  -6  11   46.91   33.24
   2   6 -10  653.99  162.05
   2   6 -10  605.55  159.54
  -2   6  10  627.45  158.85
   2  -6 -10  742.96  151.30
   2   6  -9 1097.65  215.22
   2   6  -9 1135.31   49.95
  -2   6   9 1099.36  229.95
   2  -6  -9  962.98   68.59
  -2   6   8  -17.33   40.37
   2   6  -8   25.87   16.96
   2   6  -8   22.08   35.57
   2  -6  -8  -28.78   34.10
  -2  -6   8   17.33    9.55
  -2   6   7 1248.02   57.22
   2   6  -7 1142.59   42.00
   2   6  -7 1267.75  128.01
   2  -6  -7 1017.91   40.40
  -2  -6   7 1241.00   34.20
  -2   6   6  914.42   64.01
   2   6  -6  870.66   66.65
   2   6  -6  940.03  134.57
  -2  -6   6  853.66   28.59
  -2  -6   6  904.47   42.95
   2  -6  -6  960.04  191.03
   2   6  -5   35.71   12.51
  -2   6   5   32.53   20.32
   2   6  -5   44.83   28.44
  -2   6   5   50.63   42.89
  -2  -6   5   38.51   18.49
  -2  -6   5   44.43   31.14
   2  -6  -5   42.15   43.16
   2  -6  -5  -41.65   31.60
  -2   6   4  556.63   34.53
   2   6  -4  528.91   27.33
   2   6  -4  601.12   45.51
  -2   6   4  702.27  112.04
  -2   6   4  713.96   72.50
  -2  -6   4  498.46   32.22
  -2  -6   4  550.65   22.74
   2  -6  -4  619.11   41.12
   2   6  -3  659.13   30.01
   2   6  -3  636.43   42.12
  -2   6   3  520.60   45.10
  -2   6   3  635.53  148.39
  -2  -6   3  554.36   93.33
  -2  -6   3  629.35   25.68
   2  -6  -3  568.57   39.40
  -2   6   2 3396.98   84.43
  -2   6   2 3583.67  110.64
   2   6  -2 3578.42   97.73
  -2   6   2 3653.27  118.40
  -2  -6   2 3351.31   95.24
   2  -6  -2 3549.63   93.95
  -2   6   1 1870.62   87.51
  -2   6   1 2054.34  113.21
   2   6  -1 2169.59   78.56
   2  -6  -1 1781.46   58.44
  -2  -6   1 2033.70   78.87
   2  -6  -1 1878.64   81.60
   2   6   0 1668.21   55.17
  -2   6   0 1635.97   57.80
  -2   6   0 1473.79   58.93
   2   6   0 1594.66   49.52
   2   6   0 1755.88   72.18
   2  -6   0 1478.37   60.47
   2  -6   0 1574.08   52.23
  -2  -6   0 1694.01   76.92
   2   6   120288.86  150.81
   2   6   120017.62  124.20
  -2   6  -120349.84  130.21
   2  -6   119098.73  122.39
   2  -6   119531.62  157.19
  -2  -6  -119111.25  130.24
  -2  -6  -119780.01  146.98
  -2   6  -2   45.64   23.27
   2   6   2    5.31    9.78
  -2   6  -2   45.90   26.31
   2   6   2   37.50   23.85
   2  -6   2   17.07   13.29
   2  -6   2   59.56   23.99
  -2  -6  -2    2.84    9.20
  -2  -6  -2   19.66   20.13
  -2   6  -3  246.25   44.81
   2   6   3  210.11   81.88
  -2   6  -3  218.32   57.08
   2   6   3  162.30   72.45
   2  -6   3  231.68   61.00
   2  -6   3  261.64   49.96
  -2  -6  -3  178.69   23.55
  -2  -6  -3  193.01   39.50
  -2   6  -4 3276.32   99.37
   2   6   4 2991.18   93.22
  -2   6  -4 3006.49  105.11
   2   6   4 3116.77  111.69
   2  -6   4 2887.74  112.64
   2  -6   4 2868.08   94.35
  -2  -6  -4 2929.30   94.41
   2   6   5 2441.66  111.83
   2   6   5 2365.57  128.46
  -2   6  -5 2249.27   97.27
  -2   6  -5 2179.98  169.70
   2  -6   5 2108.07   70.42
  -2  -6  -5 2231.38   89.78
   2   6   6 2504.20  149.59
  -2   6  -6 2634.43   88.52
  -2   6  -6 2568.30   96.11
  -2  -6  -6 2524.61   89.76
   2  -6   6 2528.84   80.35
   2   6   7 8094.88  184.54
  -2   6  -7 7937.90  175.66
  -2   6  -7 7227.90  188.03
  -2  -6  -7 7398.84  183.80
   2  -6   7 7813.71  166.76
  -2   6  -8 1290.94  207.41
  -2   6  -8 1099.77   55.28
   2   6   8 1204.44  138.32
  -2  -6  -8 1161.72   76.28
  -2   6  -9  330.85   74.12
  -2   6  -9  386.30  143.87
   2   6   9  476.12   87.58
  -2  -6  -9  320.17  104.82
   2   6  10 1077.32   79.50
  -2   6 -10  974.92  161.97
  -2  -6 -10  795.55   69.34
   2   6  11  184.49   71.00
  -2   6 -11  -52.21   42.06
  -2  -6 -11  148.88   94.80
   2  -6  11  118.16   34.10
   2   6  12 5532.34  153.46
  -2   6 -12 5306.98  132.42
  -2  -6 -12 4949.03  228.06
   2  -6  12 5062.05  303.39
   2   6  13   67.32   52.15
  -2   6 -13   18.50   34.13
  -2  -6 -13   69.64   27.29
   2  -6  13  128.07   53.80
   2   6  14  -26.07   54.97
  -2   6 -14    6.49   33.31
  -2  -6 -14  -51.16   70.46
   2  -6  14  -28.90   43.48
   2   6  15   93.13   56.15
  -2   6 -15   65.72   30.28
  -2  -6 -15   25.35   28.63
   2  -6  15   46.37   29.52
   2   6  16  848.67  209.87
  -2   6 -16 1031.15  291.51
  -2  -6 -16 1088.79  259.38
   2  -6  16  876.40  218.73
   2   6  17   19.51   32.79
  -2   6 -17  -18.87   46.80
  -2  -6 -17   35.83   42.51
   2  -6  17   81.05   51.13
   2   6  18   11.06   30.71
  -2   6 -18  -46.57   44.35
  -2  -6 -18   25.60   49.93
   2  -6  18   66.84   52.49
   2   6  19  162.50   43.49
  -2   6 -19  326.98   97.78
  -2  -6 -19  150.40   77.61
   2  -6  19  200.21   88.43
   2   6  20  360.00  139.07
  -2   6 -20  308.88   73.99
  -2  -6 -20  360.18  119.28
   2  -6  20  313.71  146.17
  -2   6 -21    9.73   23.13
   2   6  21   -5.74   56.25
   2  -6  21   52.60   47.56
  -2   6 -22  104.99   38.26
   2  -6  22  160.47  103.13
   2   8 -22  142.37   54.93
  -2   8  22  293.70  140.26
  -2  -8  22   41.36   69.97
   2   8 -21   30.79   42.58
  -2   8  21   41.69   50.27
  -2   8  21   96.64   62.73
  -2  -8  21   46.65   32.99
   2   8 -20   -9.52   38.90
  -2   8  20   47.07   44.73
  -2   8  20   55.57   54.90
  -2  -8  20   50.33   46.24
   2   8 -19  536.82  158.61
  -2   8  19  511.84  192.88
  -2  -8  19  618.39  160.84
  -2   8  18   62.32   65.24
   2   8 -18   23.93   28.14
   2  -8 -18  -78.69   62.01
  -2  -8  18   -1.78   48.90
  -2   8  17  118.46   42.06
   2   8 -17  173.89   49.59
   2  -8 -17  137.81   70.59
  -2  -8  17  178.91   31.64
  -2   8  16   32.52   35.86
   2   8 -16   51.27   24.88
   2  -8 -16   -8.17   59.62
  -2  -8  16    5.83   37.09
  -2   8  15 1230.29   81.25
   2   8 -15 1166.74   86.56
   2  -8 -15 1217.40  237.35
  -2  -8  15 1144.38   89.21
  -2   8  14  833.88  215.99
   2   8 -14  729.27   94.88
   2  -8 -14  892.50  217.66
  -2  -8  14  861.65   90.89
  -2   8  13 1663.01   82.16
   2   8 -13 1432.64   56.29
   2  -8 -13 1570.91  246.39
  -2  -8  13 1703.02  147.97
  -2   8  12   72.41   44.04
   2   8 -12   81.65   33.15
   2  -8 -12   96.24   38.53
   2   8 -11   12.18   22.82
   2   8 -11  -29.04   25.27
  -2   8  11   69.20   37.12
   2  -8 -11   35.32   33.65
   2   8 -10   37.74   33.13
   2   8 -10   56.23   28.91
  -2   8  10   68.25   36.01
   2  -8 -10   19.27   36.09
   2   8  -9  197.33   36.35
   2   8  -9  210.00   64.67
  -2   8   9  127.78   64.50
   2  -8  -9   90.54   52.63
  -2   8   8   25.32   28.52
   2   8  -8   21.50   18.58
   2   8  -8    9.88   15.95
   2  -8  -8  -39.20   37.93
  -2  -8   8   16.73   12.67
  -2   8   7   49.08   32.24
   2   8  -7   -6.14   19.54
   2   8  -7   15.27   19.53
   2  -8  -7  121.01   32.52
  -2  -8   7   25.53   16.91
   2   8  -6 3496.58  106.24
   2   8  -6 3513.77  112.62
  -2   8   6 3432.24  107.13
  -2   8   6 3369.14  106.28
  -2  -8   6 3457.74   90.73
  -2   8   5 3644.83  100.66
   2   8  -5 3791.09  101.36
   2   8  -5 3689.46  162.08
  -2   8   5 4024.84  113.76
  -2   8   5 3994.94  125.13
  -2  -8   5 3650.81   91.30
  -2   8   4 1679.24   50.74
   2   8  -4 1630.52   42.48
   2   8  -4 1786.58   72.75
  -2   8   4 1813.96   84.17
  -2   8   4 1799.01   80.33
  -2  -8   4 1674.23   40.90
  -2   8   3  100.25   27.30
   2   8  -3   88.36   41.26
  -2   8   3   88.36   30.45
  -2   8   3   64.61   32.32
  -2  -8   3   77.34   19.91
  -2  -8   3   88.78   10.09
  -2   8   2   31.16   15.20
  -2   8   2   24.30   24.97
   2   8  -2  -21.33   41.32
  -2   8   2   92.99   42.21
  -2  -8   2   15.37   17.88
   2   8  -1  218.65   13.91
  -2   8   1  204.47   38.32
  -2   8   1  217.55   64.81
   2   8  -1  235.16   55.93
   2  -8  -1  169.62   47.30
  -2  -8   1  224.41   52.43
   2   8   0 5727.74  132.51
  -2   8   0 6212.01  153.86
   2   8   0 5707.90  137.80
   2   8   0 5995.89  172.74
  -2   8   0 6499.04  180.39
   2  -8   0 5627.97  134.43
  -2  -8   0 5842.73  162.27
   2   8   1  871.54   29.61
  -2   8  -1  917.41   42.79
  -2   8  -1  866.15   52.33
   2   8   1  881.60   39.71
   2   8   1  847.93   51.29
   2  -8   1  785.82   33.63
   2   8   2 1930.48   77.66
   2   8   2 2017.90   70.37
  -2   8  -2 1868.10   39.08
  -2   8  -2 1849.48   64.35
   2  -8   2 1774.52   30.50
  -2  -8  -2 1768.46   41.66
   2   8   3  929.17   54.89
   2   8   3  838.75   33.84
  -2   8  -3  896.57   41.94
  -2   8  -3  819.95   85.07
   2  -8   3  805.64   41.77
  -2  -8  -3  918.08   37.13
   2   8   4 1459.90   71.61
   2   8   4 1406.38  102.15
  -2   8  -4 1427.94   67.99
  -2   8  -4 1495.25   67.89
   2  -8   4 1243.92   62.01
  -2  -8  -4 1556.29  117.51
   2   8   5   23.47   39.13
   2   8   5   11.71   15.05
  -2   8  -5   27.44   22.28
  -2   8  -5  -36.67   39.24
   2  -8   5   25.87   14.76
  -2  -8  -5  -15.51   30.05
   2   8   6  680.04   59.10
  -2   8  -6  710.19   52.91
  -2   8  -6  614.61  123.52
  -2  -8  -6  548.60   36.59
   2  -8   6  657.15   27.81
   2   8   7  438.80  135.54
  -2   8  -7  462.23   89.20
  -2   8  -7  477.73  143.93
  -2  -8  -7  516.76  120.10
   2  -8   7  423.34   31.48
  -2   8  -8 1347.69   97.40
  -2   8  -8 1548.27   47.10
   2   8   8 1686.01   87.47
  -2  -8  -8 1374.56   60.62
  -2   8  -9  168.29   45.24
  -2   8  -9  147.40   62.45
   2   8   9  202.01   67.78
  -2  -8  -9  182.22   53.47
  -2   8 -10  753.93   51.37
  -2   8 -10  661.77   47.40
   2   8  10  719.32  163.23
  -2  -8 -10  805.64  211.66
  -2   8 -11 2769.76   79.92
  -2   8 -11 2854.52  101.48
   2   8  11 3041.13  170.56
  -2  -8 -11 3007.03   99.31
   2   8  12 1547.18  136.27
  -2   8 -12 1377.38  135.45
  -2  -8 -12 1567.14   78.26
   2  -8  12 1431.42  105.35
   2   8  13  225.83   86.04
  -2   8 -13  299.56   75.98
  -2  -8 -13  332.98   86.44
   2  -8  13  255.93   69.50
   2   8  14   74.57   47.03
  -2   8 -14   99.35   47.81
  -2  -8 -14  171.58   56.09
   2  -8  14  120.53   38.11
   2   8  15  150.07   54.23
  -2   8 -15  126.77   49.77
  -2  -8 -15   99.12   42.16
   2  -8  15  -15.73   50.84
   2   8  16  887.18  164.34
  -2   8 -16  828.18   94.47
  -2  -8 -16  750.97  209.52
   2  -8  16  798.23  156.78
   2   8  17  131.84   51.86
  -2   8 -17   90.84   33.72
  -2  -8 -17   62.30   39.13
   2  -8  17  101.54   58.53
   2   8  18  685.47  235.78
  -2   8 -18  588.28  144.31
  -2  -8 -18  935.01  201.16
   2  -8  18  764.79  206.81
   2   8  19   25.85   43.16
  -2   8 -19   84.74   50.27
  -2  -8 -19   84.66   39.05
   2  -8  19  141.43   60.12
   2   8  20  106.25   50.85
  -2   8 -20   76.12   35.17
  -2  -8 -20  173.07   79.97
   2  -8  20  103.68   76.06
  -2   8 -21   78.56   36.29
   2   8  21   12.78   21.89
   2  -8  21   75.31   66.70
  -2   8 -22   34.48   20.53
  -2 -10  22  241.32   82.10
  -2  10  21  290.25  129.92
  -2 -10  21  267.11   83.05
   2  10 -20  116.73   44.66
  -2  10  20  175.44   81.03
  -2  10  20  188.94   81.46
  -2 -10  20  134.41   72.78
   2  10 -19   51.18   27.96
  -2  10  19   23.44   50.51
  -2  10  19   63.62   52.60
  -2 -10  19   43.47   19.99
   2  10 -18   21.32   23.94
  -2  10  18   56.31   63.28
  -2  10  18   72.14   39.07
  -2 -10  18   62.49   21.79
   2  10 -17  447.13   96.52
  -2  10  17  487.24  164.80
  -2  10  17  487.41  166.26
  -2 -10  17  469.98  151.38
   2  10 -16   75.70   26.11
  -2  10  16   73.18   26.51
  -2  10  16   73.74   46.25
  -2 -10  16   13.45   15.82
   2  10 -15  648.65   69.13
  -2  10  15  510.33  190.06
  -2  10  15  697.26  168.29
  -2 -10  15  469.25  100.04
   2  10 -14  106.08   20.24
  -2  10  14  244.34  105.60
  -2 -10  14  158.34   32.53
   2  10 -13   73.34   53.24
   2  10 -13  106.35   48.09
  -2  10  13  130.43   30.55
   2  10 -12  965.58   39.30
   2  10 -12 1015.92  251.63
  -2  10  12 1046.91   74.80
   2  10 -11 2343.39   91.10
  -2  10  11 2089.50  215.39
   2  10 -11 2123.64   81.34
  -2  10  11 2397.05   87.16
   2  10 -10  377.89   89.06
  -2  10  10  332.75   96.41
   2  10 -10  327.68   86.97
  -2  10  10  363.62   59.46
   2  10  -9 1389.62   50.61
   2  10  -9 1368.97  174.67
  -2  10   9 1321.48   96.20
  -2  10   9 1487.69  228.45
  -2 -10   9 1322.84   38.94
   2  10  -8  580.95   65.29
   2  10  -8  607.86  111.87
  -2  10   8  653.73  155.82
  -2  10   8  545.70  123.35
  -2 -10   8  546.80   24.48
   2  10  -7  140.40   38.48
   2  10  -7  209.29   42.22
  -2  10   7  204.58   51.39
  -2  10   7   91.36   31.66
  -2 -10   7  115.50   21.57
   2  10  -6  957.04   44.41
   2  10  -6  983.91   94.92
  -2  10   6 1041.85   55.90
  -2  10   6 1261.70  171.28
  -2 -10   6  978.50   31.74
   2  10  -5   25.19    9.40
   2  10  -5   48.94   34.82
  -2  10   5   10.13   14.68
  -2  10   5   54.43   25.52
  -2 -10   5   14.95    7.95
  -2  10   4 1425.36   48.77
   2  10  -4 1775.43  182.31
  -2  10   4 1535.65  122.78
  -2  10   4 1521.58  142.13
  -2 -10   4 1400.82   28.18
  -2  10   3  420.19   32.88
  -2  10   3  462.03  103.46
   2  10  -3  456.05  156.61
  -2  10   3  501.35  158.22
  -2  10   2  314.68   36.66
  -2  10   2  399.54   90.85
   2  10  -2  503.71  133.18
  -2  10   2  384.15   63.80
  -2  10   1  119.09   26.84
   2  10  -1  109.46   17.19
  -2  10   1  150.10   30.16
   2  10  -1  112.02   69.53
  -2  10   1   82.46   49.30
   2  10   0 1013.95   33.85
  -2  10   0 1076.19   29.68
   2  10   0 1005.34   33.78
   2  10   0 1215.86   75.59
  -2  10   0 1226.37   90.83
   2 -10   0 1014.64   52.83
   2  10   1 2909.12   80.58
  -2  10  -1 2937.80   76.72
   2  10   1 2835.84   82.20
   2  10   1 3079.15  155.33
  -2  10  -1 2973.74   98.08
   2 -10   1 2656.64   72.68
   2  10   2 1012.76   32.87
  -2  10  -2 1098.87   30.78
  -2  10  -2  957.79   49.09
   2  10   2  990.72   73.15
   2  10   2 1041.21  145.50
   2 -10   2  902.31   31.31
   2  10   3 3327.30   91.41
  -2  10  -3 3538.62  101.13
  -2  10  -3 3322.93  124.01
   2  10   3 3390.91  102.91
   2  10   3 3607.17  116.29
   2 -10   3 3094.43   84.83
   2  10   4 1686.38  109.82
   2  10   4 1558.40   72.20
  -2  10  -4 1545.65   61.52
  -2  10  -4 1495.24   80.56
   2 -10   4 1441.94   43.23
  -2 -10  -4 1646.86   94.80
   2  10   5  187.65   43.57
  -2  10  -5  328.54   67.19
  -2  10  -5  287.31   99.38
  -2 -10  -5  254.87   49.93
   2 -10   5  203.50   36.82
   2  10   6  419.00  127.48
  -2  10  -6  524.62   35.26
  -2  10  -6  442.98  111.65
  -2 -10  -6  500.06  106.37
   2 -10   6  408.92   50.98
   2  10   7  679.90  150.56
  -2  10  -7  742.14   37.75
  -2  10  -7  609.36   62.99
  -2 -10  -7  707.16   60.84
   2 -10   7  606.16   51.56
  -2  10  -8 1308.77   64.23
  -2  10  -8 1314.47   48.07
   2  10   8 1386.09   72.64
  -2 -10  -8 1272.93   74.53
  -2  10  -9   21.58   22.53
  -2  10  -9   20.42   18.51
   2  10   9  -10.92   51.83
  -2 -10  -9   85.47   33.46
  -2  10 -10 1571.35  134.59
  -2  10 -10 1458.46   44.49
   2  10  10 1508.59   94.36
  -2 -10 -10 1470.49  118.52
  -2  10 -11  253.21   91.02
  -2  10 -11  239.60   39.20
   2  10  11  202.12   94.82
  -2 -10 -11  207.21   61.25
  -2  10 -12  437.61   91.14
  -2  10 -12  474.87  123.62
   2  10  12  525.15  117.75
  -2 -10 -12  378.40   51.44
  -2  10 -13  304.83   89.88
  -2  10 -13  236.70   58.77
   2  10  13  311.46  117.34
  -2 -10 -13  184.57   81.80
   2  10  14   95.54   67.36
  -2  10 -14   70.04   20.37
  -2 -10 -14   79.35   48.64
   2 -10  14   64.39   56.12
   2  10  15  176.17   73.12
  -2  10 -15   76.69   43.46
  -2 -10 -15  219.16   89.28
   2 -10  15  137.39   56.35
   2  10  16  133.05   73.22
  -2  10 -16  114.78   33.18
  -2 -10 -16  140.90   40.67
   2 -10  16   95.63   55.29
   2  10  17   44.12   51.77
  -2  10 -17   33.89   20.47
  -2 -10 -17  -31.86   52.33
   2 -10  17  145.36   79.05
   2  10  18  530.00  205.79
  -2  10 -18  501.20   96.23
  -2 -10 -18  337.91  100.84
   2 -10  18  423.62  149.52
   2  10  19  199.22  111.92
  -2  10 -19  220.39   48.56
  -2 -10 -19  115.42   73.84
   2 -10  19  137.81   61.10
   2  10  20   30.60   46.14
  -2  10 -20   20.76   28.00
  -2 -10 -20   38.27   48.41
   2 -10  20   11.41   35.59
   2 -10  21   45.57   60.90
  -2 -12  21  131.70   58.29
  -2  12  20  328.48  116.50
  -2 -12  20  277.59   64.73
  -2  12  19  202.98   79.48
  -2  12  19  157.16   51.61
  -2 -12  19  201.41   60.65
  -2  12  18   27.30   34.80
  -2  12  18   31.59   41.59
  -2 -12  18   68.87   48.94
  -2  12  17   79.84   27.00
  -2  12  17   75.53   49.41
  -2 -12  17   86.52   44.86
   2  12 -16  127.43   28.47
  -2  12  16  120.72   45.67
  -2  12  16  129.09   64.94
  -2 -12  16   37.72   48.21
   2  12 -15  101.68   36.76
  -2  12  15  124.75   66.40
  -2  12  15  117.35   68.89
  -2 -12  15   70.07   30.15
   2  12 -14   -2.56   17.28
  -2  12  14   49.83   28.03
   2  12 -14   37.20   33.74
  -2  12  14   92.03   32.55
   2  12 -13   31.68   33.83
  -2  12  13   32.27   21.50
   2  12 -13   70.55   35.21
  -2  12  13   99.15   39.55
   2  12 -12   63.99   24.55
  -2  12  12  -29.14   47.14
   2  12 -12   46.55   34.75
  -2  12  12   37.85   36.22
   2  12 -11 2259.10   85.41
  -2  12  11 2472.86  156.90
   2  12 -11 2242.90  150.71
  -2  12  11 2331.34  139.35
   2  12 -10  495.78   58.16
  -2  12  10  409.08   91.64
   2  12 -10  519.69  153.55
  -2  12  10  532.91  141.32
   2  12  -9    8.40   16.14
  -2  12   9   36.66   42.66
   2  12  -9   34.41   28.31
  -2  12   9   86.07   34.91
   2  12  -8   12.10   16.85
   2  12  -8   60.15   20.60
  -2  12   8   27.24   15.82
  -2  12   8   40.42   43.37
  -2 -12   8   15.00    9.53
   2  12  -7  354.17   45.00
   2  12  -7  307.68   82.69
  -2  12   7  522.06  118.50
  -2  12   7  463.69  103.14
  -2 -12   7  254.78   50.07
   2  12  -6 1067.02   28.95
   2  12  -6 1219.16   70.91
  -2  12   6 1041.29   48.52
  -2  12   6  956.51   79.18
  -2 -12   6 1017.30   37.43
   2  12  -5  104.55   33.61
  -2  12   5   40.72   17.08
  -2  12   5   56.58   39.11
  -2 -12   5   39.44    9.49
  -2  12   4 1271.27   87.86
   2  12  -4 1222.63   59.43
  -2  12   4 1301.03  109.93
  -2  12   3  924.53   51.62
  -2  12   3  975.81   89.27
   2  12  -3  868.00   78.11
  -2  12   3 1111.56  201.98
  -2  12   2  614.04   48.18
  -2  12   2  723.61   51.03
   2  12  -2  853.14  192.15
  -2  12   2  748.22   59.76
  -2  12   1 3432.89  110.74
   2  12  -1 3344.75   90.29
  -2  12   1 3509.20  104.34
   2  12  -1 3307.55  116.34
  -2  12   1 3644.98  127.24
  -2  12   0  449.51   56.46
   2  12   0  526.18   21.04
  -2  12   0  504.73   49.93
   2  12   0  519.35   22.33
  -2  12   0  586.32  145.29
   2  12   0  537.75  117.89
   2  12   1  163.61   28.36
  -2  12  -1  226.52   37.69
   2  12   1  147.68   23.32
   2  12   1  141.30   64.76
  -2  12  -1  188.28   66.60
   2 -12   1  138.38   35.63
   2  12   2  143.08   38.62
  -2  12  -2  158.33   41.77
   2  12   2  154.46   42.49
   2  12   2  176.24   54.05
  -2  12  -2   74.60   32.91
   2 -12   2  113.67   28.07
   2  12   3  867.98   47.02
  -2  12  -3 1000.18   32.37
  -2  12  -3  923.11   64.78
   2  12   3  886.55   40.26
   2  12   3 1077.94  221.28
   2 -12   3  811.21   55.82
   2  12   4  215.15   31.54
  -2  12  -4  205.12   29.30
  -2  12  -4  156.25   30.61
   2  12   4  195.71   55.53
   2  12   4  190.19   75.38
   2 -12   4  160.37   35.10
  -2  12  -5   54.59   14.73
  -2  12  -5  107.57   36.57
   2  12   5   30.64   26.91
   2  12   5   78.25   32.79
   2 -12   5   26.71    9.19
  -2  12  -6 2327.77   72.17
  -2  12  -6 1934.02   86.79
   2  12   6 1936.70   69.37
   2  12   6 2202.88  175.20
   2 -12   6 1947.26   67.78
  -2  12  -7 4313.72   83.31
   2  12   7 4659.21  142.27
  -2  12  -7 4112.47  206.63
   2 -12   7 3933.02   75.94
  -2  12  -8 1799.69  101.38
  -2  12  -8 1871.21   51.26
   2  12   8 1659.40  111.42
  -2 -12  -8 1820.80   71.50
  -2  12  -9  342.52   68.39
  -2  12  -9  246.53   49.67
   2  12   9  351.12   90.39
  -2 -12  -9  294.62   60.38
  -2  12 -10   16.39   33.81
  -2  12 -10   20.78   18.58
   2  12  10   55.13   37.69
  -2 -12 -10   46.02   39.25
  -2  12 -11 1001.17  199.73
  -2  12 -11  815.64   41.30
   2  12  11 1038.07  292.90
  -2 -12 -11  850.99  142.41
  -2  12 -12  347.51   71.40
  -2  12 -12  324.70   85.42
   2  12  12  249.39  115.91
  -2 -12 -12  228.92   53.11
  -2  12 -13  960.33   94.96
  -2  12 -13  905.15   86.00
   2  12  13  970.72  217.50
  -2 -12 -13  641.21  180.91
  -2  12 -14   78.22   56.89
  -2  12 -14   60.38   23.91
   2  12  14   77.86   36.88
  -2 -12 -14   55.91   29.02
   2  12  15   -4.09   51.99
  -2  12 -15   47.81   24.89
  -2 -12 -15   39.75   29.87
   2 -12  15   26.68   39.83
   2  12  16  -24.61   57.19
  -2  12 -16   26.20   16.21
  -2 -12 -16   43.95   24.40
   2 -12  16   74.18   37.96
   2  12  17  364.57  164.84
  -2  12 -17  254.19   52.36
  -2 -12 -17  284.67   83.75
   2 -12  17  375.24  101.25
   2  12  18   -7.02   46.96
   2 -12  18   18.45   35.02
   2  12  19  132.18   51.91
   2  12  19  193.61   85.97
   2 -12  19  224.92  113.70
   2 -12  20   56.45   41.28
  -2 -14  20   39.17   33.61
  -2  14  19  101.34   39.27
  -2  14  19  164.86   80.56
  -2 -14  19  181.53   69.57
  -2  14  18  125.13   65.63
  -2  14  18   70.65   68.21
  -2 -14  18   58.50   53.75
  -2  14  17  159.91   63.00
  -2  14  17  159.06  103.30
  -2 -14  17   77.45   51.66
  -2  14  16   -6.25   53.17
  -2  14  16  -29.74   61.95
  -2 -14  16  242.07  136.34
  -2  14  15   50.73   32.25
   2  14 -15  -43.91   44.38
  -2  14  15   61.25   69.42
  -2  14  14   63.62   40.91
   2  14 -14   -0.22   44.46
  -2  14  14   13.18   29.04
  -2  14  13  214.83   79.66
   2  14 -13  254.61   95.60
  -2  14  13  362.81   90.45
  -2  14  12   88.65   52.88
   2  14 -12  187.46   65.74
  -2  14  12  277.74   91.45
  -2  14  11  265.67   88.45
   2  14 -11  345.82   63.41
  -2  14  11  317.50  101.35
   2  14 -10   26.05   17.84
  -2  14  10   32.50   26.49
   2  14 -10   44.78   37.88
  -2  14  10  100.40   49.16
   2  14  -9   64.62   20.68
  -2  14   9  203.89   49.81
   2  14  -9   86.86   42.80
  -2  14   9   77.39   39.66
   2  14  -8  260.57   50.04
  -2  14   8  323.96   76.57
   2  14  -8  163.69   55.63
  -2  14   8  320.95   84.29
  -2  14   7   -5.04   26.92
   2  14  -7   33.61   33.91
  -2  14   7   47.53   28.37
  -2  14   6 2142.40   54.15
   2  14  -6 1994.22  138.17
  -2  14   6 2201.16   85.80
  -2  14   5   -4.41   24.42
   2  14  -5  -17.41   42.65
  -2  14   5   34.03   57.95
  -2  14   4  397.60  101.39
   2  14  -4  456.39   98.90
  -2  14   4  340.83   93.26
  -2  14   3  565.63   63.04
  -2  14   3  530.20  114.67
   2  14  -3  654.78  147.57
  -2  14   3  750.09  210.98
  -2  14   2   99.78   21.27
  -2  14   2  125.89   33.34
   2  14  -2   67.82   61.05
  -2  14   2  151.21   53.28
  -2  14   1   32.81   19.47
   2  14  -1   -0.50    1.53
   2  14  -1    6.71    2.85
  -2  14   1   12.74   17.07
   2  14  -1  -23.54   40.95
  -2  14   1  -72.54   49.73
  -2  14   0  296.37   43.14
   2  14   0  295.21   40.42
  -2  14   0  330.18   59.60
   2  14   0  270.86   44.88
  -2  14   0  447.20  117.55
   2  14   0  355.63   79.38
  -2  14  -1  609.82   41.50
   2  14   1  719.06   27.77
  -2  14  -1  691.01   47.93
   2  14   1  587.51   43.42
  -2  14  -1  616.87  198.46
   2  14   1  745.06  171.89
   2  14   2 1964.48   63.51
  -2  14  -2 2064.33   84.52
   2  14   2 1934.34   63.75
   2  14   2 2356.72  223.22
  -2  14  -2 2039.23   94.87
   2 -14   2 1872.40   65.12
   2  14   3   88.61   24.43
  -2  14  -3   74.64   20.88
   2  14   3   87.79   23.15
   2  14   3   51.37   31.65
  -2  14  -3  113.66   39.80
   2 -14   3   77.42   21.96
  -2  14  -4  759.92   56.00
  -2  14  -4  789.39   59.63
   2  14   4  640.49   66.07
   2  14   4  682.43  202.60
   2 -14   4  647.26   38.63
  -2  14  -5 1462.58   30.55
  -2  14  -5 1410.71  111.37
   2  14   5 1458.21   53.06
   2  14   5 1558.59  155.74
   2 -14   5 1253.15   27.37
  -2  14  -6   -2.13   14.71
   2  14   6   60.79   23.60
  -2  14  -6   17.79   41.08
   2  14   6   44.82   33.86
  -2  14  -7 3973.80   66.42
   2  14   7 4045.92   74.17
  -2  14  -7 3664.92  129.15
   2  14   7 4276.03  118.96
  -2  14  -8 3405.58   97.87
   2  14   8 3331.10   71.34
  -2  14  -8 3210.45  179.86
   2  14   8 3776.06  149.71
  -2  14  -9 1817.85   41.91
   2  14   9 1641.40  117.09
  -2  14  -9 1758.65  122.41
   2  14   9 1629.49  148.63
  -2  14 -10  128.91   22.62
   2  14  10   14.24   36.97
  -2  14 -10   98.87   50.54
   2  14  10  104.25   75.84
  -2  14 -11  214.38   57.15
   2  14  11  231.51   66.22
  -2  14 -11  140.94   56.45
   2  14  11  219.66   79.98
  -2  14 -12 3203.72   83.70
   2  14  12 3211.48  205.00
  -2  14 -12 3322.03  186.19
   2  14  12 3647.47  114.58
  -2  14 -13   52.01   29.27
   2  14  13   21.25   29.01
  -2  14 -13   57.26   30.76
   2  14  13   26.71   61.24
   2  14  14  254.62   66.94
  -2  14 -14  118.13   65.08
   2  14  14  176.30   60.65
   2  14  15   79.81   54.42
  -2  14 -15   -7.68   46.25
   2  14  15  129.65   62.29
   2  14  16  -78.42   55.54
   2  14  16   24.86   38.36
   2 -14  16   45.08   65.49
   2  14  17  247.76   80.69
   2  14  17   86.99   95.70
   2 -14  17   67.73   67.53
   2  14  18   -6.31   45.01
   2  14  18   74.85   53.54
   2 -14  18   47.50   31.06
   2 -14  19   72.25   53.35
  -2 -16  19   81.22   39.08
  -2  16  18   49.62   30.41
  -2 -16  18   55.23   31.20
  -2  16  17   75.67   36.62
  -2 -16  17  123.48   44.80
  -2  16  16  -40.16   46.52
   2  16 -16    3.81   35.69
  -2  16  16  -21.05   75.27
  -2  16  15   18.97   23.56
   2  16 -15  -65.56   46.49
  -2  16  15  120.24   48.46
  -2  16  14  208.48   48.55
   2  16 -14  331.69  102.22
  -2  16  14  322.36  111.71
  -2  16  13   21.13   28.08
   2  16 -13   95.91   44.77
  -2  16  13  -12.75   54.08
  -2  16  12  373.28  143.56
   2  16 -12  639.16  102.35
  -2  16  12  348.22  150.58
  -2  16  11  -51.70   37.77
   2  16 -11  -18.49   56.21
  -2  16  11   35.93   59.54
  -2  16  10   29.39   18.95
   2  16 -10   22.69   30.87
  -2  16  10  -30.05   64.48
  -2  16   9   73.21   43.05
   2  16  -9  100.32   39.23
  -2  16   9   92.43   60.91
  -2  16   8  103.06   46.91
   2  16  -8  142.98   75.37
  -2  16   8  148.43   70.10
  -2  16   7  380.28   63.41
   2  16  -7  359.19  106.03
  -2  16   7  462.71  146.96
  -2  16   6   77.29   26.45
   2  16  -6   97.10   44.34
  -2  16   6   85.31   45.50
  -2  16   5   28.00   22.37
   2  16  -5   53.34   27.62
  -2  16   5  -11.75   71.08
  -2  16   4  576.34  134.38
   2  16  -4  717.41   89.58
  -2  16   4  646.24  152.57
  -2  16   3 5988.11   86.54
   2  16  -3 6164.53  106.62
  -2  16   2 1755.90   68.99
   2  16  -2 1907.66  109.66
  -2  16   2 1976.16  123.84
  -2  16   1 2129.00   41.35
   2  16  -1 2070.25   87.19
  -2  16   1 2034.88  113.75
   2  16   0    1.67    5.21
  -2  16   0   27.21   15.48
  -2  16   0  -22.43   60.36
   2  16   0   14.46   27.14
  -2  16  -1  204.39   32.88
   2  16   1  198.97   27.92
  -2  16  -1  109.06   42.97
   2  16   1  251.04   73.81
  -2  16  -2   12.70    5.26
   2  16   2   29.90   10.06
  -2  16  -2   43.84   49.35
   2  16   2   -2.16   61.09
   2  16   3 3082.99   45.68
  -2  16  -3 3012.44  113.02
   2  16   3 3086.91  126.32
   2  16   4  261.47   44.67
  -2  16  -4  204.40   79.51
   2  16   4  158.42   70.65
   2  16   5  242.55   53.54
  -2  16  -5  217.96   59.54
   2  16   5  283.24  167.77
   2  16   6  -44.10   27.71
  -2  16  -6   72.25   60.77
   2  16   6   56.67   55.63
   2  16   7  856.83   99.12
  -2  16  -7  846.39  164.97
   2  16   7  686.54  224.17
   2  16   8  190.85   72.76
  -2  16  -8  241.45   81.07
   2  16   8  194.79  113.43
   2  16   9  630.27   76.57
  -2  16  -9  701.66  159.63
   2  16   9  848.00  249.69
   2  16  10   84.80   45.41
  -2  16 -10   36.71   39.95
   2  16  10  -41.22   65.98
   2  16  11 1022.14   87.61
  -2  16 -11 1211.31  272.05
   2  16  11  985.10  276.16
   2  16  12  204.17   86.12
  -2  16 -12  494.90  102.18
   2  16  12  371.04  118.12
   2  16  13  439.29  168.99
  -2  16 -13  516.88  151.31
   2  16  13  423.89   96.52
   2  16  14   33.31   37.85
  -2  16 -14  155.36   74.26
   2  16  14   82.43   60.14
   2  16  15  183.40  112.35
  -2  16 -15  102.30   43.67
   2  16  15  298.87  136.17
   2  16  16  -39.71   41.78
   2  16  16  -27.17   73.77
   2  16  17   80.46   46.91
   2  16  17   64.50   51.75
   2 -16  17   22.96   32.26
   2 -16  18  -18.17   55.63
  -2  18  17  294.50  131.99
  -2  18  16   -2.96   40.95
   2  18 -16  -18.12   40.60
  -2  18  16   83.56   98.83
  -2  18  15   20.65   30.41
   2  18 -15    4.46   27.35
  -2  18  15   61.45   82.99
  -2  18  14   79.12   33.87
   2  18 -14  246.68   70.35
  -2  18  14   23.49   57.10
  -2  18  13  344.70   67.64
   2  18 -13  320.01   86.93
  -2  18  13  386.97  131.28
  -2  18  12  337.11  104.47
   2  18 -12  397.39  104.45
  -2  18  12  314.52  135.52
  -2  18  11  -17.04   31.37
   2  18 -11   65.23   30.31
  -2  18  11   31.96   29.91
  -2  18  10   29.22   23.94
   2  18 -10   54.67   33.53
  -2  18  10   32.71   28.90
  -2  18   9   31.94   32.71
   2  18  -9   78.27   37.02
  -2  18   9   -0.91   58.35
  -2  18   8  417.05  104.86
   2  18  -8  637.88  176.44
  -2  18   8  607.81  237.92
  -2  18   7  363.08   80.18
   2  18  -7  502.87  123.54
  -2  18   7  460.70  147.18
  -2  18   6   32.63   27.21
   2  18  -6   37.94   44.48
  -2  18   6   21.29   35.88
  -2  18   5  877.36  125.99
   2  18  -5  811.12  189.23
  -2  18   5  916.20  253.04
  -2  18   4  444.53   88.76
   2  18  -4  519.04  133.17
  -2  18   4  563.85  200.12
  -2  18   3   17.27   10.46
   2  18  -3   98.40   45.32
  -2  18   3   32.60   43.06
  -2  18   2 4886.31   57.23
   2  18  -2 5124.64  106.77
  -2  18   2 5374.83  363.80
   2  18  -1  123.87   74.98
  -2  18   1  187.79   45.86
  -2  18   0  145.20   61.92
   2  18   0  137.85   55.63
  -2  18  -1 1277.21   77.07
   2  18   1 1472.74  101.80
  -2  18  -2  543.71  118.32
   2  18   2  580.79  154.67
  -2  18  -3  359.00  110.98
   2  18   3  361.95   82.89
   2  18   4   36.59   15.12
  -2  18  -4  103.03   39.01
   2  18   4  106.19   48.54
   2  18   5   20.78   17.47
  -2  18  -5   55.07   31.10
   2  18   5   30.56   48.27
   2  18   6   65.85   25.90
  -2  18  -6  -87.41   55.65
   2  18   6   83.46   47.96
   2  18   7  159.29   57.39
  -2  18  -7  150.40   56.98
   2  18   7  145.73   60.98
   2  18   8   86.38   31.30
  -2  18  -8  119.62   50.16
   2  18   8   36.05   35.68
   2  18   9  407.46  121.05
  -2  18  -9  322.32  102.29
   2  18   9  388.33  134.60
   2  18  10  123.29   58.07
   2  18  10   71.23   50.01
   2  18  11   87.02   35.00
  -2  18 -11  140.14   45.33
   2  18  11   52.63   77.05
   2  18  12  229.48   64.91
  -2  18 -12  249.62   64.79
   2  18  12  242.52   67.89
   2  18  13  259.93   93.50
  -2  18 -13  208.77   76.30
   2  18  13  230.69   88.03
   2  18  14   -1.54   19.62
  -2  18 -14  -60.97   48.23
   2  18  14   94.26   39.95
  -2  18 -15  217.67   49.37
   2  18  15  298.57  148.64
   2  18  16  212.11   62.38
  -2  18 -16  103.62   64.72
   2  18  17   64.50   58.45
   2  20 -15   29.51   26.52
  -2  20  14   38.46   30.94
   2  20 -14  -11.67   27.06
  -2  20  14   65.12   98.41
   2  20 -13 1133.26  114.16
  -2  20  13 1263.40  211.79
   2  20 -12  -35.50   44.05
  -2  20  12   88.20   60.33
   2  20 -11  118.06   54.68
  -2  20  11   14.61   63.38
   2  20 -10  428.00  138.84
  -2  20  10  544.90  112.80
   2  20  -9   63.10   38.92
  -2  20   9   40.34   49.78
   2  20  -8   -1.67   50.86
  -2  20   8  -25.95   51.24
   2  20  -7 1829.17  121.23
  -2  20   7 1878.75  179.28
   2  20  -6  279.89   70.34
  -2  20   6  428.68   93.07
   2  20  -5   80.41   67.24
  -2  20   5  108.36   69.16
   2  20  -4  -14.03   56.15
  -2  20   4  127.58   70.42
   2  20  -3  109.71   54.92
  -2  20   3   85.44   42.20
   2  20  -2  104.33   45.11
  -2  20   2  137.58   59.71
   2  20  -1  290.70   92.88
  -2  20   1  344.92   75.02
  -2  20   0  350.08  139.16
   2  20   0  279.42  108.68
  -2  20  -1 1214.67  267.26
   2  20   1 1300.35  127.13
  -2  20  -2  276.37  126.94
   2  20   2  232.23  121.54
  -2  20  -3 1003.61  104.70
   2  20   3  943.48  317.42
  -2  20  -4   -6.99   65.28
   2  20   4   33.81   53.54
  -2  20  -5  183.62   84.87
   2  20   5  161.57   55.96
  -2  20  -6  256.34  123.19
   2  20   6  160.58   86.63
  -2  20  -7 1149.86   76.70
   2  20   7 1462.07  127.09
  -2  20  -8   -7.25   33.05
   2  20   8   -2.89   54.79
  -2  20  -9   46.36   53.53
   2  20   9  -14.28   36.37
  -2  20 -10  215.10   52.00
   2  20  10    7.77   44.92
  -2  20 -11   69.20   46.57
   2  20  11  -54.17   55.39
  -2  20 -12   26.16   22.98
   2  20  12  211.92   75.92
  -2  20 -13  504.61  120.22
   2  20  13  387.47  221.59
  -2  20 -14  374.11  127.95
   2  22 -13  355.45   86.33
   2  22 -12   95.97   34.55
   2  22 -11  149.81   52.38
  -2  22  11  135.55   87.88
   2  22 -10   76.65   26.92
  -2  22  10   44.28   52.05
   2  22  -9  125.64   43.56
  -2  22   9   32.99   24.33
   2  22  -8  246.45   70.24
  -2  22   8  252.59   65.87
   2  22  -7  -18.06   33.19
  -2  22   7   65.65   53.67
   2  22  -6  365.19   99.57
  -2  22   6  254.54   96.70
   2  22  -5   98.40   56.88
  -2  22   5   57.44   47.69
   2  22  -4   35.87   36.22
  -2  22   4   51.45   41.58
   2  22  -3  287.96   97.16
  -2  22   3  284.24   60.60
   2  22  -2  785.57  177.35
  -2  22   2  896.07  360.17
   2  22  -1  178.33   90.57
  -2  22   1  224.44  111.35
  -2  22   0  110.65  102.16
   2  22   0  138.20   52.51
  -2  22  -1  225.34   83.58
   2  22   1  160.79   63.99
  -2  22  -2   32.06   47.16
   2  22   2  100.96   48.33
  -2  22  -3   69.59   43.33
   2  22   3   75.67   42.25
  -2  22  -4   72.94   58.85
   2  22   4   46.35   51.56
  -2  22  -5  353.15  108.21
   2  22   5  392.52  122.82
  -2  22  -6  130.12   74.59
   2  22   6  136.13   52.47
  -2  22  -7    3.76   46.54
   2  22   7  -26.08   59.97
  -2  22  -8   89.27   43.12
   2  22   8  101.24   39.07
  -2  22  -9   94.28   49.70
   2  22   9   62.03   68.31
  -2  22 -10  164.62   56.74
   2  22  10   90.30   43.60
  -2  22 -11   81.79   34.11
   2  24  -9   26.22   45.99
   2  24  -8   54.76   61.58
   2  24  -7   60.55   32.10
  -2  24   7  106.37   74.00
   2  24  -6  212.54   48.10
  -2  24   6  148.01   67.36
   2  24  -5  -40.36   55.59
  -2  24   5   -9.88   60.41
   2  24  -4  132.90   65.59
  -2  24   4   93.24   42.35
   2  24  -3  106.96   61.94
  -2  24   3   12.83   33.86
   2  24  -2  137.55   63.75
  -2  24   2  135.09   63.89
   2  24  -1   66.60   35.13
  -2  24   1   32.40   32.93
  -2  24   0   57.58   31.53
   2  24   0  118.28   84.98
  -2  24  -1 1228.58  131.02
   2  24   1 1046.73  328.31
  -2  24  -2  270.36  121.99
   2  24   2  303.52   98.38
  -2  24  -3  -37.45   64.88
   2  24   3   54.50   22.06
  -2  24  -4  142.66   53.64
   2  24   4  167.62   95.10
  -2  24  -5   -8.98   60.56
   2  24   5  -60.28   61.65
  -2  24  -6  -40.36   56.39
   2  24   6   65.82   51.47
  -2  24  -7   68.14   49.58
   2  24   7   50.79   67.44
  -2  24  -8  100.49   51.55
  -3   1  23  156.28   63.96
  -3  -1  23  113.46   53.77
  -3   1  22   68.64   38.83
   3   1 -22  109.71   37.59
   3  -1 -22  115.37   49.30
  -3   1  21  269.79   71.92
   3   1 -21  203.66   63.58
   3  -1 -21  151.85   87.13
  -3  -1  21  215.49   86.50
  -3   1  20   37.20   27.12
   3   1 -20   28.96   24.46
   3  -1 -20   66.34   39.45
  -3  -1  20  106.97   58.49
  -3   1  19   55.46   51.53
   3   1 -19  -12.27   49.87
   3  -1 -19   58.05   41.66
  -3  -1  19  -17.14   44.26
  -3   1  18   31.01   21.72
   3   1 -18   54.86   71.96
   3  -1 -18   68.73   47.06
  -3  -1  18    0.31   25.17
  -3   1  17  102.61   41.94
   3   1 -17   94.58   42.65
   3  -1 -17  196.97   66.56
  -3  -1  17   96.40   52.70
  -3   1  16  176.04   69.19
   3   1 -16  205.06   69.65
   3  -1 -16  271.74   86.45
  -3  -1  16  129.98   42.63
  -3   1  15  838.27  207.93
   3   1 -15  980.72  230.67
   3  -1 -15 1130.03  281.04
  -3  -1  15 1017.37   87.10
  -3   1  14  201.43   50.10
   3   1 -14   98.52  108.13
   3  -1 -14  195.40   50.30
  -3  -1  14  106.00   50.63
  -3   1  13 6687.82  170.69
   3   1 -13 6171.70  139.43
   3  -1 -13 6063.64  129.43
  -3  -1  13 6691.74  138.00
  -3   1  12  377.89   77.64
   3   1 -12  183.98   66.52
   3  -1 -12  272.52   71.01
  -3  -1  12  280.76   78.12
  -3   1  1113866.76  373.65
   3   1 -1113031.63  369.82
   3  -1 -1113663.58  408.74
  -3  -1  1113437.89  362.53
  -3   1  10 1288.64   83.78
   3   1 -10 1080.24  116.34
   3  -1 -10 1176.36   57.88
  -3  -1  10 1200.04   53.01
  -3   1   9   51.85   27.09
   3   1  -9  116.28   60.06
   3  -1  -9   71.23   74.47
  -3  -1   9   86.62   40.58
   3   1  -8 2361.06   92.83
  -3   1   8 2207.72   92.28
   3  -1  -8 2211.75   85.52
  -3  -1   8 2014.28   69.05
  -3  -1   8 2273.63  155.16
   3  -1  -8 2053.73   72.28
  -3   1   7 1146.16   97.41
   3   1  -7  934.92   65.51
  -3   1   7  984.56   58.63
  -3  -1   7  976.42   39.40
  -3  -1   7  857.70   60.31
   3  -1  -7 1074.68   54.19
  -3  -1   7 1145.61  126.84
   3  -1  -7  922.23   77.11
  -3   1   610515.36  211.32
   3   1  -610190.05  203.64
  -3   1   6 9931.43  198.11
  -3  -1   6 9935.18  197.35
  -3  -1   6 9351.76  185.14
   3  -1  -6 9950.01  202.23
   3  -1  -6 9877.15  195.87
  -3  -1   610165.15  201.34
  -3   1   5 1282.35   55.96
   3   1  -5 1160.48   50.03
  -3   1   5 1244.89   65.96
  -3  -1   5 1043.74   79.64
  -3  -1   5  919.03   47.26
   3  -1  -5 1303.72   94.50
   3  -1  -5 1209.89  110.46
  -3  -1   5 1095.81   52.15
  -3   1   419864.32  130.96
  -3  -1   419013.00  131.93
   3  -1  -419340.99  135.65
   3  -1  -419252.00  127.13
  -3  -1   419187.26  123.36
   3   1  -3 2510.94   67.41
  -3   1   3 2572.09   67.79
  -3   1   3 2746.63   77.61
  -3   1   3 2829.59   80.33
  -3  -1   3 2677.31   85.50
  -3  -1   3 2476.69   62.63
   3  -1  -3 2766.66  100.41
  -3  -1   3 2573.63   65.53
   3   1  -2 2980.99   89.03
   3  -1  -2 3226.29   76.51
   3   1   1  411.38   39.88
  -3   1  -2  863.08   43.16
   3   1   2  823.08   31.70
  -3   1  -2  721.43   41.95
   3   1   2  854.08   57.26
   3  -1   2  870.17   30.74
   3  -1   2  680.40   30.23
  -3  -1  -2  904.22   43.01
  -3  -1  -2  768.49   33.90
   3   1   3 2779.74   73.45
  -3   1  -3 2834.77   85.03
  -3  -1  -3 2955.60   88.38
   3  -1   3 2721.57   71.46
   3  -1   3 2554.20   81.58
  -3  -1  -3 2461.85   93.81
   3  -1   3 2757.76   98.44
   3   1   4  143.22   33.81
  -3   1  -4  115.74   48.53
   3   1   4   90.09   44.22
   3  -1   4  113.34   43.75
   3  -1   4   83.72   27.66
  -3  -1  -4  136.19   47.84
  -3  -1  -4  131.91   40.33
   3  -1   4   53.60   30.92
   3   1   510805.63  217.52
   3  -1   511321.41  225.30
  -3  -1  -511031.12  220.93
  -3  -1  -510223.48  203.09
   3  -1   510588.50  228.99
   3   1   6 3996.76  102.76
  -3   1  -6 3707.32  118.84
   3   1   6 3768.87  142.95
   3  -1   6 3622.57  113.56
   3  -1   6 3127.99  104.64
  -3  -1  -6 3930.77   70.66
   3  -1   6 3677.39  160.01
  -3  -1  -6 3737.04  147.88
   3   1   7  867.46  105.80
  -3   1  -7  705.75   73.62
  -3  -1  -7  864.40   92.88
   3  -1   7  622.84   54.40
   3   1   8  460.33  143.87
  -3   1  -8  352.38  127.10
  -3  -1  -8  492.73  134.48
   3  -1   8  464.90   78.48
  -3   1  -9  119.43   84.19
   3   1   9  125.30   50.84
   3  -1   9  145.06   47.29
   3   1  10  141.23   49.78
  -3   1 -10   66.95   33.84
  -3  -1 -10   94.26   73.94
   3  -1  10  119.64   47.60
   3   1  11 1114.42   77.14
  -3   1 -11 1097.28   56.89
  -3  -1 -11  994.54   64.29
   3  -1  11 1118.88  118.14
   3   1  12  475.12   88.16
  -3   1 -12  458.04   84.78
  -3  -1 -12  453.17  123.14
   3  -1  12  488.49   90.59
   3   1  13 5321.69  251.24
  -3   1 -13 4691.09  171.63
  -3  -1 -13 5301.19  146.53
   3  -1  13 5058.76  234.65
   3   1  14  539.52  127.12
  -3   1 -14  595.99  169.04
  -3  -1 -14  506.14  137.13
   3  -1  14  610.55   89.45
   3   1  15  156.77   61.26
  -3   1 -15  349.36   86.20
  -3  -1 -15  156.24   53.64
   3  -1  15  293.53   67.59
   3   1  16  -66.13   56.82
  -3   1 -16    8.24   26.85
  -3  -1 -16   60.54   46.09
   3  -1  16   43.90   32.09
   3   1  17  -16.90   57.34
  -3   1 -17   62.10   66.13
  -3  -1 -17   39.85   42.11
   3  -1  17   76.42   53.55
   3   1  18   -0.98   39.28
  -3   1 -18  -31.50   54.23
  -3  -1 -18   33.03   45.11
   3  -1  18  -33.29   58.53
   3   1  19    1.52   25.13
  -3   1 -19  -77.87   51.09
  -3  -1 -19   54.14   53.24
   3  -1  19   17.47   43.77
   3   1  20  288.81   89.71
  -3   1 -20  233.35  115.55
  -3  -1 -20  266.55   78.10
   3  -1  20  134.33   32.08
   3   1  21  317.81   78.34
  -3   1 -21  434.41  101.48
  -3  -1 -21  261.65   88.67
   3  -1  21  322.07  122.90
   3   1  22  174.12   76.72
   3  -1  22  176.02   76.25
  -3   3  23  137.44   46.94
  -3  -3  23   -5.39   35.67
   3   3 -22   68.51   20.99
  -3   3  22   25.73   47.67
  -3  -3  22   85.74   30.07
  -3   3  21   98.20   48.69
   3   3 -21  111.75   59.95
   3  -3 -21  201.65   72.72
  -3  -3  21   46.86   35.16
  -3   3  20   86.84   42.13
   3   3 -20   35.96   31.14
   3  -3 -20  179.79   80.00
  -3  -3  20   70.02   49.24
  -3   3  19  168.74   50.71
   3   3 -19  191.31   83.11
   3  -3 -19  105.92   56.57
  -3  -3  19  233.72   69.29
  -3   3  18   47.47   36.42
   3   3 -18   26.49   30.20
   3  -3 -18  -22.13   71.26
  -3  -3  18   40.22   30.88
  -3   3  17   84.41   59.32
   3   3 -17   58.99   47.09
   3  -3 -17  -35.81   64.21
  -3  -3  17   30.11   28.59
  -3   3  16   40.85   45.27
   3   3 -16   65.91   31.80
   3  -3 -16   23.79   53.50
  -3  -3  16   18.09   28.62
  -3   3  15   59.51   45.26
   3   3 -15   46.72   29.69
   3  -3 -15   78.86   33.84
  -3  -3  15   41.15   38.86
  -3   3  14   33.46   29.12
   3   3 -14   59.90   55.30
   3  -3 -14   60.61   34.01
  -3  -3  14   20.69   30.17
  -3   3  13 2700.18  110.99
   3   3 -13 2739.52  144.69
   3  -3 -13 2733.16  113.45
  -3  -3  13 2748.92  111.05
  -3   3  12 3091.51  155.11
   3   3 -12 2654.10  142.11
   3  -3 -12 2770.87   87.50
  -3  -3  12 2814.06   95.91
  -3   3  11 1292.97  100.68
   3   3 -11 1309.76  130.63
   3  -3 -11 1209.24  114.81
  -3  -3  11 1369.26   82.43
  -3   3  10  121.28   24.76
   3   3 -10   74.78   67.57
   3  -3 -10  137.13   42.37
  -3  -3  10   53.35   25.07
  -3   3   9 1558.60  128.14
   3   3  -9 1327.43   64.89
   3  -3  -9 1391.34  185.09
  -3  -3   9 1530.29   70.72
  -3   3   8  150.62   46.35
   3   3  -8   57.06   51.25
   3  -3  -8  319.92   71.65
  -3  -3   8   98.91   20.25
  -3  -3   8  128.60   35.06
  -3  -3   8   95.75   26.40
  -3   3   7 6573.69  192.33
   3   3  -7 6187.45  155.99
   3  -3  -7 6150.53  161.68
  -3  -3   7 5589.33  136.94
  -3  -3   7 5825.06  142.38
   3  -3  -7 5946.98  147.31
  -3  -3   7 5791.87  143.28
  -3   3   6 2110.28   75.42
   3   3  -6 1805.86   90.71
   3   3  -6 1665.58   83.95
  -3   3   6 2140.50   81.29
  -3  -3   6 1831.95   63.01
  -3  -3   6 1727.68   80.28
   3  -3  -6 2106.86  180.22
   3  -3  -6 2014.13   69.17
  -3   3   5  780.83   32.32
   3   3  -5  865.63   66.88
   3   3  -5  755.60   56.67
  -3   3   5  851.90   49.31
  -3  -3   5  931.88   93.41
  -3  -3   5  736.74   65.07
   3  -3  -5  874.78   82.78
   3  -3  -5  838.38   78.26
  -3   3   4 4095.33  103.59
   3   3  -4 3758.36   94.42
   3   3  -4 3822.48   94.97
  -3   3   4 4485.42  125.28
  -3  -3   4 3873.35  104.15
  -3  -3   4 3806.67   95.44
   3  -3  -4 4332.75  106.73
  -3   3   3 5107.30  129.87
   3   3  -3 5189.02  121.02
   3   3  -3 5286.32   95.81
  -3   3   3 5206.97  127.36
  -3   3   3 5490.79  120.22
  -3  -3   3 5054.46  118.48
  -3  -3   3 5515.38   54.05
   3  -3  -3 5374.01  138.38
   3   3  -2   34.00   30.59
  -3   3   2   36.45   27.53
  -3   3   2   29.28   21.18
   3  -3  -2  -14.89   22.70
  -3  -3   2   19.29   16.32
  -3  -3   2   19.50   14.87
  -3  -3   2   29.26   11.70
   3  -3  -2   58.50   30.14
   3   3  -1  421.81   77.25
   3   3  -1  320.57   42.31
  -3   3   1  338.12   73.62
  -3   3   1  434.37   98.38
   3  -3  -1  323.16   88.03
  -3  -3   1  378.53   30.87
   3  -3  -1  343.12   28.72
  -3  -3   1  364.83   71.54
   3   3   0 1266.09   41.92
   3   3   0 1324.29   48.54
  -3   3   0 1449.40   59.87
   3  -3   0 1373.91   50.36
   3  -3   0 1457.15   82.94
  -3  -3   0 1325.52   21.83
  -3  -3   0 1270.22   37.49
  -3   3  -1  630.94   31.25
   3   3   1  538.55   23.42
  -3   3  -1  607.63  122.77
   3   3   1  626.59  120.05
   3  -3   1  566.02   28.89
   3  -3   1  570.16   25.25
  -3  -3  -1  573.93   46.45
  -3  -3  -1  527.88   78.50
   3   3   2 3146.71   88.19
   3   3   2 3206.28   79.81
  -3  -3  -2 3239.32   83.16
   3  -3   2 2822.11   74.90
   3  -3   2 3028.44   75.80
  -3  -3  -2 3021.06   78.49
  -3   3  -310552.18  207.77
   3   3   310095.37  198.11
  -3   3  -3 9872.27  198.32
   3   3   310689.48  213.86
   3  -3   310037.07  197.59
   3  -3   3 9459.66  188.63
  -3  -3  -310375.11  204.61
  -3  -3  -310130.72  200.83
  -3   3  -4  141.32   57.53
   3   3   4   91.56   42.55
  -3   3  -4  168.55   63.45
   3   3   4   89.35   39.72
   3  -3   4  153.24   46.14
   3  -3   4  101.81   28.09
  -3  -3  -4   81.56   47.72
  -3  -3  -4   87.93   42.35
  -3   3  -5  420.36   39.53
   3   3   5  410.97   26.89
  -3   3  -5  458.46  139.66
   3   3   5  461.24   50.62
   3  -3   5  453.49  108.58
   3  -3   5  318.04   82.59
  -3  -3  -5  454.66  120.06
  -3  -3  -5  477.73   89.61
   3   3   6 1026.85   45.26
  -3   3  -6 1092.46   56.39
  -3   3  -6  984.81   64.48
   3   3   6 1052.23   50.19
   3  -3   6 1051.10   43.35
   3  -3   6  980.37   57.00
  -3  -3  -6 1002.89   89.62
   3   3   7   35.99   33.24
  -3   3  -7    2.49   28.46
  -3  -3  -7  -26.33   42.60
   3  -3   7   48.79   55.48
   3   3   8   75.32   62.03
  -3   3  -8   -1.38   44.46
  -3  -3  -8   31.75   26.79
   3  -3   8    9.71   30.91
   3   3   9  665.81   66.56
  -3   3  -9  576.49  173.83
  -3  -3  -9  530.12  130.02
   3  -3   9  677.84  152.07
   3   3  10  138.92   46.91
  -3   3 -10  -17.69   43.26
  -3  -3 -10   27.32   39.73
   3  -3  10   56.04   40.18
   3   3  11 1013.09   76.05
  -3   3 -11  829.59   76.21
  -3  -3 -11 1101.80  229.41
   3  -3  11  959.52   60.93
   3   3  12  126.24   69.34
  -3   3 -12  140.08   53.31
  -3  -3 -12  130.41   59.99
   3  -3  12   93.68   59.71
   3   3  13  -59.40   54.24
  -3   3 -13   90.42   61.79
  -3  -3 -13   56.28   40.32
   3  -3  13  -25.60   53.64
   3   3  14  849.73  176.30
  -3   3 -14  735.71   70.16
  -3  -3 -14  819.50  181.97
   3  -3  14  918.55   79.24
   3   3  15 2221.68  168.77
  -3   3 -15 1854.41   91.88
  -3  -3 -15 1925.18  254.88
   3  -3  15 1855.50  162.44
   3   3  16  588.03  161.61
  -3   3 -16  594.06  143.81
  -3  -3 -16  610.28  165.54
   3  -3  16  608.09  161.02
   3   3  17   30.91   52.68
  -3   3 -17  -24.82   58.52
  -3  -3 -17   66.43   58.68
   3  -3  17   87.83   55.45
   3   3  18   64.50   24.66
  -3   3 -18   22.86   37.66
  -3  -3 -18  -41.31   65.85
   3  -3  18  122.83   52.31
   3   3  19   77.85   51.82
  -3   3 -19   44.87   37.58
  -3  -3 -19  102.22   52.86
   3  -3  19  122.88   50.33
   3   3  20   27.17   28.93
  -3   3 -20   74.90   44.90
  -3  -3 -20   90.95   43.96
   3  -3  20  -45.16   56.99
   3   3  21   69.28   45.52
  -3   3 -21   40.78   28.93
  -3  -3 -21   65.02   46.84
   3  -3  21   71.95   39.93
  -3   3 -22  244.69   50.62
   3   3  22  112.06   39.10
   3  -3  22   67.52   77.16
   3   5 -23  -55.60   42.10
  -3   5  23   19.23   44.94
  -3  -5  23   58.74   20.25
   3   5 -22  252.88   62.59
  -3   5  22  186.55   73.69
  -3  -5  22  199.96   83.91
   3   5 -21  170.11   77.91
  -3   5  21   81.79   45.70
  -3   5  21  113.70   53.26
  -3   5  20  148.12   94.64
   3   5 -20  184.77   49.58
   3  -5 -20  167.18  166.94
  -3  -5  20  182.69   49.41
  -3   5  19   45.55   53.25
   3   5 -19  102.02   57.01
   3  -5 -19   46.09   45.16
  -3  -5  19  138.07   48.59
  -3   5  18  129.08   57.34
   3   5 -18   65.78   64.99
   3  -5 -18   71.66   55.61
  -3  -5  18   42.26   36.49
  -3   5  17  463.55   92.86
   3   5 -17  456.82  123.76
   3  -5 -17  370.26   94.45
  -3  -5  17  408.43  125.04
  -3   5  16 1073.87   82.57
   3   5 -16  860.28  203.36
   3  -5 -16 1144.30  205.11
  -3  -5  16 1007.62  101.40
  -3   5  15 1919.56  146.60
   3   5 -15 1749.76   97.03
   3  -5 -15 1811.42  242.18
  -3  -5  15 1769.08  126.91
  -3   5  14   36.76   22.13
   3   5 -14  -18.30   47.70
   3  -5 -14   99.55   47.78
  -3  -5  14  104.20   38.91
  -3   5  13  489.73   95.31
   3   5 -13  522.01  144.77
   3  -5 -13  689.99  153.54
  -3  -5  13  414.37   91.51
  -3   5  12 5369.36  128.60
   3   5 -12 5053.42  126.79
   3  -5 -12 4794.89  151.12
  -3  -5  12 5018.65  125.95
  -3   5  11  254.69   80.57
   3   5 -11  174.04   43.17
   3  -5 -11  314.91   53.19
  -3  -5  11  243.87   57.06
  -3   5  10 1934.40   66.61
   3   5 -10 1712.95   58.46
   3  -5 -10 1743.31   91.96
  -3  -5  10 1760.62  121.82
   3   5  -9   79.45   29.49
   3   5  -9   38.60   21.72
  -3   5   9  -20.18   36.10
   3  -5  -9  124.27   49.49
  -3   5   8 1272.79  138.42
   3   5  -8 1367.33   49.66
   3   5  -8 1309.26  165.53
   3  -5  -8 1232.68   53.97
  -3  -5   8 1377.52   48.19
  -3   5   7 1251.23  103.67
   3   5  -7 1107.95  112.90
   3   5  -7 1116.63   81.66
  -3  -5   7 1136.78   36.70
  -3  -5   7  956.92   82.75
   3  -5  -7 1125.70   58.38
  -3   5   6  452.12  114.71
   3   5  -6  513.36   34.86
   3   5  -6  496.46   45.43
  -3   5   6  543.78  122.30
  -3  -5   6  456.40   48.30
  -3  -5   6  460.61   31.76
   3  -5  -6  548.95   93.20
   3  -5  -6  549.81  117.62
  -3   5   5 2017.67   70.63
   3   5  -5 1917.39   69.47
   3   5  -5 2019.43   75.19
  -3   5   5 2116.26   79.25
  -3   5   5 2230.91   83.26
  -3  -5   5 1826.64   62.89
  -3  -5   5 1874.28   63.53
   3  -5  -5 2099.32   72.23
  -3   5   4 1565.90   58.99
   3   5  -4 1451.53   56.52
   3   5  -4 1495.57   67.17
  -3   5   4 1489.53   69.85
  -3   5   4 1559.70   86.39
  -3  -5   4 1446.35   68.18
  -3  -5   4 1596.58   64.94
   3  -5  -4 1621.84  110.00
  -3   5   3 1573.18   58.73
   3   5  -3 1489.78   46.08
   3   5  -3 1715.92   63.89
  -3   5   3 1588.53   81.71
  -3   5   3 1686.79   67.76
  -3  -5   3 1582.91   66.83
  -3  -5   3 1589.16   47.25
   3  -5  -3 1510.93   58.77
  -3   5   2  477.15  115.18
   3   5  -2  369.89   84.34
  -3   5   2  373.12   90.63
   3  -5  -2  381.17   87.49
  -3  -5   2  414.70   71.25
   3  -5  -2  327.56   79.14
  -3   5   1 3816.30  101.04
   3   5  -1 3764.50   97.10
  -3   5   1 4078.66  111.19
   3  -5  -1 3692.10  100.02
   3  -5  -1 3796.46  108.92
  -3  -5   1 3545.33   93.93
  -3   5   0 4794.01  114.13
   3   5   0 4944.96  112.36
  -3   5   0 4751.79  122.03
   3   5   0 5074.03  129.82
   3  -5   0 4424.25  107.37
   3  -5   0 4699.04  116.76
  -3  -5   0 4627.64  105.97
  -3  -5   0 4653.34  117.50
   3   5   119106.58  129.81
  -3  -5  -118106.74  126.49
   3  -5   118242.42  119.30
  -3  -5  -118914.20  177.71
  -3   5  -2  391.23   89.89
   3   5   2  316.09   49.62
  -3   5  -2  298.05   77.25
   3   5   2  411.02   55.88
   3  -5   2  284.21   32.80
   3  -5   2  267.50   65.64
  -3  -5  -2  356.97   81.26
  -3  -5  -2  383.01   75.26
  -3   5  -3 6046.67  125.08
   3   5   3 5585.46   54.17
  -3   5  -3 5674.54  127.65
   3   5   3 5843.99  129.80
   3  -5   3 5708.09   52.91
   3  -5   3 5414.30   63.19
  -3  -5  -3 5625.36  119.81
  -3  -5  -3 5750.63  161.50
  -3   5  -4   39.62   25.54
   3   5   4   30.25   25.80
  -3   5  -4   39.43   26.11
   3   5   4   56.13   33.75
   3  -5   4   46.19   24.85
   3  -5   4   28.24   12.72
  -3  -5  -4   66.69   27.73
  -3  -5  -4   94.54   35.94
   3   5   5 1682.23  174.46
   3   5   5 1619.99   65.85
  -3   5  -5 1734.66   57.75
  -3   5  -5 1653.80   92.80
   3  -5   5 1769.96   59.74
  -3  -5  -5 1429.78  132.04
   3   5   6  488.57  148.55
  -3   5  -6  548.99  131.46
  -3   5  -6  428.93  113.89
  -3  -5  -6  433.16   84.25
   3  -5   6  330.01   87.69
  -3   5  -7  611.05  118.68
  -3   5  -7  650.00  177.84
   3   5   7  574.80   53.36
  -3  -5  -7  574.34   51.01
  -3   5  -8  445.61  123.13
  -3   5  -8  446.25  122.22
   3   5   8  526.48  166.34
  -3  -5  -8  428.36   94.95
   3   5   9 3225.15  117.49
  -3   5  -9 2882.30  103.46
  -3  -5  -9 2861.84  106.67
   3  -5   9 3018.03  110.05
   3   5  10  690.18   81.53
  -3   5 -10  697.71  117.60
  -3  -5 -10  757.67   68.85
   3  -5  10  750.36  195.01
   3   5  11  102.82   37.09
  -3   5 -11  130.36   45.53
  -3  -5 -11   81.97   31.50
   3  -5  11  143.51   80.47
   3   5  12  212.23   77.15
  -3   5 -12  155.38   60.76
  -3  -5 -12  141.54   66.65
   3  -5  12  157.87   65.57
   3   5  13  852.75  212.51
  -3   5 -13  939.50   82.46
  -3  -5 -13  835.35  215.65
   3  -5  13  924.37  213.81
   3   5  14 1879.92  192.15
  -3   5 -14 1332.97  191.74
  -3  -5 -14 1730.78  114.33
   3  -5  14 1361.38  218.68
   3   5  15   55.50   40.09
  -3   5 -15  -13.57   51.06
  -3  -5 -15   54.57   28.47
   3  -5  15  -35.42   48.78
   3   5  16   17.55   33.85
  -3   5 -16  127.91   63.88
  -3  -5 -16  106.68   77.13
   3  -5  16   71.11   36.95
   3   5  17  443.08  146.98
  -3   5 -17  549.14  131.15
  -3  -5 -17  452.76  127.02
   3  -5  17  405.19  172.91
   3   5  18  479.17  107.45
  -3   5 -18  373.76  112.53
  -3  -5 -18  515.15  170.64
   3  -5  18  410.27  122.14
   3   5  19  -14.07   57.43
  -3   5 -19  -40.09   56.71
  -3  -5 -19  -24.20   56.73
   3  -5  19   74.75   47.31
   3   5  20   56.70   57.25
  -3   5 -20  120.71   44.31
  -3  -5 -20  -12.02   54.42
   3  -5  20   -6.71   55.86
   3   5  21   76.52   46.70
  -3   5 -21   55.34   32.61
  -3  -5 -21   93.55   46.37
   3  -5  21   36.02   42.98
  -3   5 -22  -11.72   42.92
   3  -5  22   46.98   54.95
   3   7 -22  -26.74   38.53
  -3   7  22  -58.57   62.54
  -3  -7  22   51.32   20.90
   3   7 -21  124.21   42.90
  -3   7  21   62.90   49.07
  -3   7  21  237.02   79.26
  -3  -7  21  113.40   32.13
   3   7 -20   -1.55   39.87
  -3   7  20   60.87   53.05
  -3   7  20   35.93   37.98
  -3  -7  20   34.08   26.55
   3   7 -19   77.41   38.33
  -3   7  19   11.41   31.63
  -3  -7  19   46.49   24.92
  -3   7  18   78.15   72.30
   3   7 -18   61.38   23.34
   3  -7 -18   78.60   35.52
  -3  -7  18  149.32   63.35
  -3   7  17   88.37   70.91
   3   7 -17   57.15   38.39
   3  -7 -17   64.72   24.58
  -3  -7  17   38.04   31.90
  -3   7  16  359.33   97.66
   3   7 -16  249.84   63.53
   3  -7 -16  460.98   92.55
  -3  -7  16  338.25   76.28
  -3   7  15  -22.99   47.17
   3   7 -15   34.15   24.99
   3  -7 -15  -37.60   71.98
  -3  -7  15    3.52   24.68
  -3   7  14  328.81   90.88
   3   7 -14  376.14   79.88
   3  -7 -14  369.01   77.61
  -3  -7  14  387.00  106.28
  -3   7  13 2495.25  155.86
   3   7 -13 2181.24  142.66
   3  -7 -13 2519.85  110.77
  -3  -7  13 2258.91  154.96
  -3   7  12 2334.28  161.41
   3   7 -12 2514.71   61.08
   3  -7 -12 2308.49   89.60
  -3  -7  12 2392.05  236.54
   3   7 -11  731.57  152.99
   3   7 -11  791.33   43.15
  -3   7  11  777.66   73.91
   3  -7 -11  955.09   76.85
   3   7 -10  135.88   50.26
   3   7 -10   72.64   58.64
  -3   7  10  111.14   89.63
   3  -7 -10   36.58   61.30
   3   7  -9   -8.88   43.36
   3   7  -9   17.59   19.13
  -3   7   9   -9.89   42.29
   3  -7  -9   43.39   25.74
  -3   7   8 2066.48   59.75
   3   7  -8 2012.68   62.64
   3   7  -8 1951.84  104.26
   3  -7  -8 1790.00   58.67
  -3  -7   8 2014.20   38.06
   3   7  -7 2740.78  126.35
   3   7  -7 2752.64  152.62
  -3   7   7 2588.26   92.15
  -3   7   7 2905.04   93.81
  -3  -7   7 2847.22   82.34
   3   7  -6 2410.83   76.37
   3   7  -6 2473.53   88.09
  -3   7   6 2595.06  186.38
  -3   7   6 2655.60   89.24
  -3  -7   6 2442.08   76.76
   3   7  -5   13.06    9.84
  -3   7   5   15.60   24.98
   3   7  -5   60.46   57.50
  -3   7   5   11.65   16.83
  -3   7   5   20.84   27.12
  -3  -7   5   22.18   18.22
  -3  -7   5   -5.94   12.84
  -3   7   4 1198.20   43.35
   3   7  -4 1379.96   38.98
   3   7  -4 1328.91   91.49
  -3   7   4 1373.97   81.51
  -3   7   4 1375.70   75.06
  -3  -7   4 1403.49   70.69
  -3  -7   4 1373.96   37.66
  -3   7   3  229.61   51.17
  -3   7   3  333.81   52.92
  -3   7   3  285.49   53.86
   3   7  -3  270.47   73.18
  -3  -7   3  213.06   22.58
  -3  -7   3  224.35   38.21
  -3  -7   3  226.57   21.76
   3  -7  -3  218.19   43.79
  -3   7   2 5729.81  120.10
   3   7  -2 6236.26  137.26
  -3   7   2 6362.93  142.19
  -3  -7   2 5905.90  126.39
   3  -7  -2 6091.80  130.48
  -3   7   1 2064.76   82.05
   3   7  -1 2321.50   91.66
  -3   7   1 2151.67   87.61
   3  -7  -1 2010.38   65.64
   3  -7  -1 2197.95  123.30
  -3  -7   1 2257.77   85.13
   3   7   0   65.35   11.78
  -3   7   0   84.98   30.45
  -3   7   0   41.31   42.49
   3   7   0   62.94   26.99
   3   7   0   -3.87   41.80
   3  -7   0   37.10   30.85
   3  -7   0   86.85   30.22
  -3  -7   0   77.98   28.32
  -3   7  -1  675.71   32.62
   3   7   1  640.39   24.05
  -3   7  -1  677.09   47.01
   3   7   1  710.41  159.00
   3  -7   1  669.92   30.77
   3  -7   1  714.98   42.40
  -3  -7  -1  627.05   27.36
  -3  -7  -1  659.36   34.17
  -3   7  -2 2476.80   76.94
   3   7   2 2331.66   72.11
  -3   7  -2 2473.72   97.92
   3   7   2 2508.59   91.52
   3  -7   2 2298.82   83.49
   3  -7   2 2453.23   85.59
  -3  -7  -2 2398.88   94.44
  -3  -7  -2 2491.34  114.77
   3   7   3 8198.95  137.39
   3   7   3 8103.99  141.19
  -3   7  -3 8213.62  119.63
  -3   7  -3 7761.44  217.65
   3  -7   3 7373.38  173.57
  -3  -7  -3 7490.35  112.94
   3   7   4 1646.49  112.33
   3   7   4 1585.79   48.01
  -3   7  -4 1532.42   47.63
  -3   7  -4 1506.09   64.94
   3  -7   4 1396.20   49.33
  -3  -7  -4 1479.39   51.28
  -3   7  -5 4771.11  157.07
   3   7   5 4897.01  125.08
  -3   7  -5 4662.45  182.07
   3  -7   5 4434.34  116.98
  -3  -7  -5 4540.46  118.70
   3   7   6 1512.84   73.33
  -3   7  -6 1454.33   46.16
  -3   7  -6 1333.72   54.75
  -3  -7  -6 1542.07   67.23
   3  -7   6 1339.97   42.80
   3   7   7 2458.07   96.05
  -3   7  -7 2821.72  118.35
  -3   7  -7 2688.91   97.04
  -3  -7  -7 2436.89   81.07
   3  -7   7 2562.62   73.30
  -3   7  -8  154.17   74.71
  -3   7  -8  164.77   58.46
   3   7   8  133.82   54.01
  -3  -7  -8  158.03   59.69
  -3   7  -9 9999.05  290.40
  -3   7  -911116.21  163.48
   3   7   910953.41  269.51
  -3  -7  -910066.45  162.63
  -3   7 -10  -29.16   42.13
  -3   7 -10   32.85   25.37
   3   7  10  -28.38   50.09
  -3  -7 -10   11.43   39.23
   3   7  11  556.30  133.10
  -3   7 -11  495.82  141.01
  -3  -7 -11  569.72  156.53
   3  -7  11  562.22  145.59
   3   7  12 1180.35  213.63
  -3   7 -12 1139.86  120.29
  -3  -7 -12  980.82  257.78
   3  -7  12 1103.52  222.14
   3   7  13 1265.41  147.35
  -3   7 -13 1254.42   69.71
  -3  -7 -13 1040.97  272.20
   3  -7  13 1044.38  175.33
   3   7  14 1775.76  101.75
  -3   7 -14 1610.28   91.64
  -3  -7 -14 1608.78  106.15
   3  -7  14 1752.47  190.81
   3   7  15   70.22   50.64
  -3   7 -15   96.72   41.03
  -3  -7 -15  139.00   66.26
   3  -7  15  112.42   46.11
   3   7  16   50.20   32.87
  -3   7 -16   67.37   24.02
  -3  -7 -16   99.99   45.07
   3  -7  16   50.38   36.94
   3   7  17  543.57  156.12
  -3   7 -17  764.78  162.68
  -3  -7 -17  728.46  214.70
   3  -7  17  682.74  109.75
   3   7  18   86.56   41.74
  -3   7 -18   10.81   32.69
  -3  -7 -18   12.12   45.40
   3  -7  18   40.73   46.54
   3   7  19  371.07  264.83
  -3   7 -19  582.02  167.39
  -3  -7 -19  402.83  152.45
   3  -7  19  470.42  233.51
   3   7  20  181.96  108.64
  -3   7 -20  283.30   74.97
  -3  -7 -20  202.86   72.19
   3  -7  20  212.81   57.25
  -3   7 -21  -17.28   40.39
   3   7  21   29.95   31.18
   3  -7  21   41.54   28.53
  -3   7 -22   24.34   29.07
  -3   9  22  244.61  115.22
  -3  -9  22  239.05   82.41
   3   9 -21   81.90   49.12
  -3   9  21   59.73   64.72
  -3   9  21  118.18   62.64
  -3  -9  21   80.70   32.31
   3   9 -20  -37.01   31.84
  -3   9  20   66.94   33.85
  -3   9  20   51.76   61.30
  -3  -9  20   80.90   36.90
   3   9 -19  157.39   37.43
  -3   9  19  155.04   55.70
  -3   9  19  144.84   68.43
  -3  -9  19  123.97   46.57
   3   9 -18  -20.03   31.50
  -3   9  18    4.98   44.27
  -3   9  18   95.89   50.72
  -3  -9  18   34.59   42.33
   3   9 -17  379.70   93.79
  -3   9  17  267.37  120.49
  -3   9  17  306.96   88.53
  -3  -9  17  374.79   70.25
   3   9 -16  866.07  196.50
  -3   9  16 1011.14  247.40
  -3   9  16  968.06  106.06
  -3  -9  16 1063.83  125.01
   3   9 -15  437.06  132.21
  -3   9  15  451.86  137.07
  -3   9  15  489.29   90.20
  -3  -9  15  512.08  166.47
   3   9 -14  329.39   99.55
  -3   9  14  290.71  113.29
  -3  -9  14  341.02   88.33
   3   9 -13  161.01   50.25
  -3   9  13  243.11   78.99
  -3  -9  13   82.61   31.97
   3   9 -12 1476.99   88.43
   3   9 -12 1430.13  101.77
  -3   9  12 1319.66  114.20
   3   9 -11   18.12   10.72
  -3   9  11  101.86   62.73
   3   9 -11   11.81   19.40
  -3   9  11  -30.13   54.16
   3   9 -10 3001.41   72.89
  -3   9  10 2759.04  174.95
   3   9 -10 2778.28  120.39
  -3   9  10 2675.45  230.09
   3   9  -9   35.56   17.34
   3   9  -9   18.01   28.88
  -3   9   9   93.21   39.02
  -3   9   9   53.46   44.32
  -3  -9   9   18.99   14.57
   3   9  -8  365.79   90.01
   3   9  -8  341.89   84.46
  -3   9   8  437.06  116.27
  -3   9   8  490.71   78.76
  -3  -9   8  349.47   32.21
   3   9  -7   24.64    9.47
   3   9  -7   34.94   34.38
  -3   9   7   -9.46   43.55
  -3   9   7   70.73   24.69
  -3  -9   7   45.82   18.55
   3   9  -6   31.32   18.36
   3   9  -6   57.30   36.76
  -3   9   6   50.88   31.34
  -3   9   6   47.70   26.56
  -3  -9   6   23.81    7.37
   3   9  -5 2065.24   55.81
   3   9  -5 1935.42   81.52
  -3   9   5 2224.09  115.49
  -3   9   5 2315.64  109.39
  -3  -9   5 2113.56   60.50
  -3   9   4   -5.74   22.44
   3   9  -4   45.10   29.38
  -3   9   4  -28.83   35.20
  -3   9   4    7.68   24.08
  -3  -9   4   18.86    6.89
  -3   9   3  127.82   29.78
  -3   9   3  120.87   37.07
   3   9  -3  118.84   52.21
  -3   9   3  100.68   32.61
  -3   9   2   13.69   14.98
  -3   9   2   18.59   25.69
   3   9  -2    4.79   55.20
  -3   9   2   27.77   37.95
   3   9  -1   -0.01    1.40
  -3   9   1    6.70   12.35
  -3   9   1  -10.52   42.22
   3   9  -1   -3.33   26.10
   3  -9  -1   17.60   16.54
   3   9   0 2944.26   87.04
  -3   9   0 2689.87   83.39
   3   9   0 2895.43   84.60
   3   9   0 2911.10  115.14
  -3   9   0 2440.52  152.77
   3  -9   0 2493.65   76.35
   3   9   1   80.29   20.93
  -3   9  -1   47.05   20.29
  -3   9  -1   84.50   30.49
   3   9   1   82.33   28.29
   3   9   1  224.43  109.01
   3  -9   1   41.03   18.55
   3   9   2   98.65   31.25
   3   9   2   98.11   28.60
  -3   9  -2   68.72   26.29
  -3   9  -2   55.58   28.10
   3  -9   2   68.06   18.37
  -3  -9  -2   32.49   26.37
   3   9   3 1011.04   86.43
   3   9   3  963.49   56.53
  -3   9  -3  966.67   29.57
  -3   9  -3  863.30   51.33
   3  -9   3  855.88   25.91
  -3  -9  -3  945.10   53.98
   3   9   4  973.70   74.99
   3   9   4  924.86   33.51
  -3   9  -4  948.83   36.36
  -3   9  -4  943.90   80.93
   3  -9   4  833.27   46.32
  -3  -9  -4  849.61   41.27
   3   9   5  181.44   60.27
  -3   9  -5  223.87   59.10
  -3   9  -5  200.94   93.87
  -3  -9  -5  122.58   39.06
   3  -9   5  147.45   27.30
   3   9   6  107.57   50.51
  -3   9  -6  132.00   43.91
  -3   9  -6  139.86   59.19
  -3  -9  -6   61.00   26.76
   3  -9   6   95.10   30.31
   3   9   7   28.74   45.81
  -3   9  -7   53.00   23.38
  -3   9  -7   52.27   36.81
  -3  -9  -7   56.71   33.21
   3  -9   7   45.11   21.21
  -3   9  -8   28.09   37.61
  -3   9  -8   14.08   30.54
   3   9   8  129.07   41.95
  -3  -9  -8   66.26   24.95
  -3   9  -9 2598.67   97.79
  -3   9  -9 2576.23  123.56
   3   9   9 2738.42  107.34
  -3  -9  -9 2776.83  110.29
  -3   9 -10   96.60   34.19
  -3   9 -10  168.02   50.71
   3   9  10  195.94   53.16
  -3  -9 -10  121.81   66.28
  -3   9 -11  -13.87   56.12
  -3   9 -11  -51.21   23.97
   3   9  11   18.49   36.59
  -3  -9 -11   39.73   29.64
  -3   9 -12   25.51   31.58
  -3   9 -12   -1.78   31.17
   3   9  12   -3.64   64.09
  -3  -9 -12   91.44   50.24
   3   9  13  769.82  241.02
  -3   9 -13  897.30   79.11
  -3  -9 -13  688.30  156.89
   3  -9  13  570.39  118.09
   3   9  14   -3.54   68.78
  -3   9 -14  -27.77   30.78
  -3  -9 -14   66.46   25.53
   3  -9  14   -7.66   35.03
   3   9  15  288.74   99.85
  -3   9 -15  173.67   75.14
  -3  -9 -15  146.07   54.92
   3  -9  15  257.31   89.42
   3   9  16  -12.93   54.77
  -3   9 -16  117.85   30.67
  -3  -9 -16   50.41   39.99
   3  -9  16  144.32   85.93
   3   9  17   76.03   43.34
  -3   9 -17   26.22   21.39
  -3  -9 -17   48.39   34.56
   3  -9  17   63.72   46.40
   3   9  18  135.55  106.10
  -3   9 -18  120.20   51.52
  -3  -9 -18  168.75   67.90
   3  -9  18   28.87   26.13
   3   9  19   79.78   45.40
  -3   9 -19   43.09   25.78
  -3  -9 -19   -7.23   53.34
   3  -9  19  107.04   60.06
   3   9  20    6.13   47.01
  -3   9 -20   44.79   26.04
  -3  -9 -20  151.93   57.16
   3  -9  20   51.16   48.81
  -3   9 -21   62.89   25.42
   3  -9  21   40.38   64.39
  -3  11  21  129.34   75.70
  -3 -11  21   11.45   53.21
  -3  11  20  228.14   61.37
  -3  11  20   18.86   49.56
  -3 -11  20   60.62   18.18
  -3  11  19   86.58   77.15
  -3  11  19  129.53   59.81
  -3 -11  19  253.74   79.07
   3  11 -18  771.72   97.10
  -3  11  18 1028.30  159.82
  -3  11  18  766.75  269.94
  -3 -11  18  608.79  193.00
   3  11 -17  142.60   53.21
  -3  11  17  226.67   94.95
  -3 -11  17  221.98  180.22
   3  11 -16   60.56   39.44
  -3  11  16   91.93   47.03
  -3  11  16   46.65   60.83
  -3 -11  16  141.63   53.50
   3  11 -15   20.71   24.80
  -3  11  15   -4.31   52.45
  -3  11  15   68.56   72.37
  -3 -11  15  -14.80   40.88
   3  11 -14  111.58   41.66
  -3  11  14   77.44   32.38
   3  11 -14  122.41   61.73
  -3  11  14   42.62   57.29
   3  11 -13   48.05   21.70
  -3  11  13  117.41   47.77
   3  11 -13   71.03   50.44
  -3  11  13  152.32   58.35
   3  11 -12 3724.90  125.88
  -3  11  12 3959.91  122.32
   3  11 -12 3880.05  116.39
  -3  11  12 4341.21  137.40
   3  11 -11 3142.88  130.01
  -3  11  11 3496.48   98.92
   3  11 -11 3172.49  151.00
  -3  11  11 3820.59  233.11
   3  11 -10  361.86   46.33
  -3  11  10  488.12  147.10
   3  11 -10  400.38  120.09
  -3  11  10  514.57  121.45
   3  11  -9  601.28   90.22
   3  11  -9  499.84  145.07
  -3  11   9  726.20  135.37
  -3  11   9  756.65  171.77
  -3 -11   9  497.94   47.89
   3  11  -8  777.56   43.91
   3  11  -8  807.10   58.92
  -3  11   8  866.08   79.66
  -3  11   8  968.98  198.88
  -3 -11   8  827.13   24.54
   3  11  -7  187.16   41.90
   3  11  -7  172.88   68.22
  -3  11   7  191.73   44.84
  -3  11   7  212.34   86.28
  -3 -11   7  139.12   30.34
   3  11  -6   65.86   16.82
   3  11  -6   30.29   23.56
  -3  11   6   11.16   37.76
  -3  11   6   -0.42   52.18
  -3 -11   6   40.24   11.55
  -3  11   5 3072.14  155.71
   3  11  -5 2510.20  104.91
  -3 -11   5 2343.35   69.19
  -3  11   4  119.18   40.42
   3  11  -4   38.04   34.13
  -3  11   4  123.46   57.84
  -3  11   3 3261.13   97.09
  -3  11   3 3194.19  106.02
   3  11  -3 3500.73  121.25
  -3  11   3 3419.89  119.17
  -3  11   2   19.83   10.48
  -3  11   2   57.07   28.08
   3  11  -2  -50.92   44.76
  -3  11   2   59.70   48.22
  -3  11   1   30.60   17.25
   3  11  -1   28.26    4.65
   3  11  -1   19.65    4.36
  -3  11   1   43.53   18.03
   3  11  -1   78.78   43.43
  -3  11   1  -47.02   48.62
   3  11   0   60.80   13.18
  -3  11   0   47.01   23.34
   3  11   0   36.55   15.19
   3  11   0   68.68   38.96
  -3  11   0   88.56   36.14
   3 -11   0   45.46   17.07
   3  11   1 3614.56   92.23
  -3  11  -1 3677.94  103.24
   3  11   1 3559.22   91.01
   3  11   1 3936.40  121.38
  -3  11  -1 3718.70  117.57
   3 -11   1 3380.71   90.49
   3  11   2 1515.19   48.72
  -3  11  -2 1574.27   74.96
  -3  11  -2 1373.71   58.04
   3  11   2 1400.34   60.20
   3  11   2 1492.10   80.17
   3 -11   2 1250.35   63.19
   3  11   3  543.12   66.69
  -3  11  -3  676.85   52.77
  -3  11  -3  656.67  176.30
   3  11   3  536.74   54.38
   3  11   3  562.38   65.24
   3 -11   3  600.25   29.57
   3  11   4 3972.44  112.47
  -3  11  -4 4432.08  122.26
   3  11   4 4105.63  174.21
  -3  11  -4 4125.48  139.07
   3 -11   4 3772.51  109.35
   3  11   5 1522.24  129.23
  -3  11  -5 1674.43   81.41
  -3  11  -5 1543.95   62.22
  -3 -11  -5 1488.90   91.79
   3 -11   5 1567.68   32.70
   3  11   6  251.97   73.07
  -3  11  -6  145.72   34.14
  -3  11  -6  133.77   68.46
  -3 -11  -6  137.20   35.92
   3 -11   6   93.90   29.78
   3  11   7  125.88   36.25
  -3  11  -7   83.51   38.58
  -3  11  -7   64.68   22.66
  -3 -11  -7   73.05   23.51
   3 -11   7  117.56   33.92
  -3  11  -8  264.86   44.40
  -3  11  -8  231.16   60.83
   3  11   8  323.17   73.67
  -3 -11  -8  228.99   53.50
  -3  11  -9  772.10   49.79
  -3  11  -9  829.75  101.93
   3  11   9  931.62  112.40
  -3 -11  -9  938.72  209.99
  -3  11 -10  452.92   97.94
  -3  11 -10  421.57  104.68
   3  11  10  469.46  150.26
  -3 -11 -10  532.92   94.26
  -3  11 -11   31.08   32.88
  -3  11 -11   23.64   25.97
   3  11  11    8.81   42.70
  -3 -11 -11  -10.98   46.12
  -3  11 -12  -55.21   44.67
  -3  11 -12   28.00   35.03
   3  11  12   -0.72   39.31
  -3 -11 -12   19.70   29.29
  -3  11 -13  944.80  191.65
  -3  11 -13 1011.04   49.08
   3  11  13 1288.71  106.99
  -3 -11 -13  856.21  257.46
   3  11  14  890.16  171.33
  -3  11 -14  774.10   90.32
  -3 -11 -14  817.44  170.76
   3 -11  14  763.09  153.72
   3  11  15   58.54   41.49
  -3  11 -15  134.05   41.33
  -3 -11 -15   91.16   35.53
   3 -11  15  183.85   66.71
   3  11  16   47.16   33.00
  -3  11 -16   40.39   23.64
  -3 -11 -16  143.01   56.94
   3 -11  16   70.84   42.58
   3  11  17   92.13   68.94
  -3  11 -17  172.52   43.59
  -3 -11 -17  116.15   65.80
   3 -11  17  284.25   71.20
   3  11  18  404.31  170.04
  -3  11 -18  486.92  108.31
  -3 -11 -18  438.52  146.98
   3 -11  18  332.08  106.07
   3  11  19   54.64   92.93
  -3  11 -19   39.78   14.26
  -3 -11 -19   74.74   65.66
   3 -11  19   51.29   45.76
   3 -11  20   84.04   73.53
  -3  13  20   39.55   58.59
  -3 -13  20   51.45   29.51
  -3  13  19  712.19  268.01
  -3  13  19  745.96  315.61
  -3 -13  19  800.36  114.86
  -3  13  18  463.93  181.51
  -3  13  18  454.39  140.16
  -3 -13  18  370.19  133.04
  -3  13  17  138.15   52.00
  -3  13  17  106.22   87.81
  -3 -13  17   52.66   43.64
  -3  13  16  481.78  213.20
  -3  13  16  622.01  184.94
  -3 -13  16  353.66   85.74
  -3  13  15  159.42   53.86
   3  13 -15  104.58   54.94
  -3  13  15   84.47   43.17
  -3  13  14   82.59   50.74
   3  13 -14   22.51   23.91
  -3  13  14   14.73   57.53
   3  13 -13  144.41   45.79
  -3  13  13  180.53  115.82
   3  13 -13  203.19   68.97
  -3  13  13  153.26   72.03
   3  13 -12 2529.31   88.32
   3  13 -12 2758.61  127.78
  -3  13  12 2997.34  120.35
   3  13 -11 1060.57   74.78
  -3  13  11 1311.75  116.68
   3  13 -11 1220.91  226.61
  -3  13  11 1193.75   86.64
   3  13 -10   46.93   17.51
  -3  13  10   38.70   30.65
   3  13 -10   60.29   40.68
  -3  13  10  -19.24   66.88
   3  13  -9   49.48   21.84
  -3  13   9   44.45   27.10
   3  13  -9   -8.51   54.47
  -3  13   9   13.87   62.04
   3  13  -8 1248.04   27.49
  -3  13   8 1360.10  153.51
   3  13  -8 1400.21  118.02
  -3  13   8 1415.53   77.45
   3  13  -7 1372.51   73.76
  -3  13   7 1373.17   48.72
  -3  13   7 1667.09   86.29
  -3 -13   7 1287.43   35.85
  -3  13   6  457.85  105.42
   3  13  -6  255.66   71.57
  -3  13   6  210.74   61.37
  -3  13   5  286.57   73.87
   3  13  -5  264.60   60.05
  -3  13   5  340.35  124.31
  -3  13   4 3775.39   97.44
   3  13  -4 3663.08   97.58
  -3  13   4 4060.24  112.69
  -3  13   3 2560.80   44.69
  -3  13   3 2616.08  100.22
   3  13  -3 2639.46   72.80
  -3  13   3 2744.97   71.94
  -3  13   2  992.91   27.18
  -3  13   2 1159.19   57.20
   3  13  -2 1033.66   61.79
  -3  13   2 1337.92   92.62
  -3  13   1  743.25   59.76
  -3  13   1  809.94   46.39
   3  13  -1  929.85  198.46
  -3  13   1  796.61   55.49
  -3  13   0 6547.25  103.05
  -3  13   0 7007.92   99.90
   3  13   0 6757.33   89.55
  -3  13   0 7324.57  136.29
   3  13   0 6890.80  126.14
   3  13   1  190.66   32.25
  -3  13  -1  203.73   43.62
   3  13   1  208.83   31.50
   3  13   1  106.45   46.70
  -3  13  -1  206.42   56.75
   3 -13   1  148.87   42.01
   3  13   2   43.78   23.59
  -3  13  -2   72.48   24.15
   3  13   2   54.40   43.90
   3  13   2   67.09   24.13
  -3  13  -2   39.02   33.42
   3 -13   2   48.81   15.06
   3  13   3 2824.27   45.22
  -3  13  -3 2918.61   66.63
   3  13   3 2795.91   50.91
  -3  13  -3 2831.17  107.27
   3  13   3 2958.93   89.60
  -3  13  -4 1711.87   44.45
  -3  13  -4 1800.83  157.19
   3  13   4 1703.63   61.61
   3  13   4 1534.67   77.72
   3 -13   4 1501.69   42.09
  -3  13  -5   18.39   15.25
  -3  13  -5   25.13   30.73
   3  13   5    4.71    7.98
   3  13   5   49.30   47.06
   3 -13   5   14.08    6.54
  -3  13  -6  347.86   62.25
  -3  13  -6  313.95   83.19
   3  13   6  292.56   55.69
   3  13   6  468.52  124.96
   3 -13   6  227.62   44.60
  -3  13  -7   23.04   11.56
   3  13   7   -2.26   26.31
  -3  13  -7   73.67   45.19
   3  13   7   16.45   24.65
  -3  13  -8 3249.94  189.08
  -3  13  -8 3414.13   53.76
   3  13   8 3733.86  191.78
  -3 -13  -8 3095.85  145.02
  -3  13  -9   81.00   32.50
  -3  13  -9  108.33   25.10
   3  13   9  186.76   80.05
  -3 -13  -9   97.49   45.06
  -3  13 -10  110.29   45.98
  -3  13 -10  149.56   52.25
   3  13  10  182.04   77.15
  -3 -13 -10   64.89   51.43
  -3  13 -11   77.92   44.91
  -3  13 -11   31.66   31.82
   3  13  11   48.94   64.42
  -3 -13 -11   79.12   40.23
  -3  13 -12  416.70   88.19
  -3  13 -12  331.55   71.11
   3  13  12  376.37  130.88
  -3 -13 -12  280.48   61.41
  -3  13 -13  198.74   66.34
  -3  13 -13  270.66   51.88
   3  13  13  287.60   98.08
  -3 -13 -13  257.85   71.12
  -3  13 -14  379.66   80.24
  -3  13 -14  418.81  112.52
   3  13  14  445.97  111.65
  -3 -13 -14  416.89   96.04
   3  13  15  198.93   78.92
  -3  13 -15   70.31   25.76
  -3 -13 -15  104.47   63.08
   3 -13  15   92.74   38.00
   3  13  16   43.89  117.07
  -3 -13 -16   25.60   29.77
   3 -13  16   25.61   36.68
   3  13  17  121.77   71.16
   3 -13  17    6.55   46.81
   3  13  18   64.89   29.77
   3  13  18   58.81   56.10
   3 -13  18  -12.91   55.22
   3 -13  19   -8.56   57.36
  -3 -15  19  151.16   56.90
  -3  15  18   71.56   57.82
  -3  15  18  107.07   62.31
  -3 -15  18   40.42   18.73
  -3  15  17  391.64  159.34
  -3  15  17  457.74  186.85
  -3  15  16  103.27   51.72
  -3  15  16   13.06   47.08
  -3  15  15  332.35  131.54
   3  15 -15  261.52   80.25
  -3  15  15  265.27   84.21
  -3  15  14   80.94   52.72
   3  15 -14  -16.52   44.00
  -3  15  14   43.41   50.79
  -3  15  13  186.02   83.23
   3  15 -13  148.41   38.49
  -3  15  13  189.53   41.80
  -3  15  12   -2.30   31.28
   3  15 -12   83.21   38.52
  -3  15  12   -2.28   57.81
  -3  15  11  226.32   47.62
   3  15 -11  153.43   86.71
  -3  15  11  114.85   47.26
  -3  15  10  230.73   41.86
   3  15 -10  180.74   66.62
  -3  15  10  254.94   96.32
  -3  15   9   47.52   27.70
   3  15  -9   16.17   16.76
  -3  15   9   29.42   40.35
  -3  15   8 2959.80  101.33
   3  15  -8 3137.97  210.55
  -3  15   8 2884.30  141.87
  -3  15   7 2106.00   81.39
   3  15  -7 2010.26  110.63
  -3  15   7 2168.39  157.48
  -3  15   6 1165.65  101.09
   3  15  -6 1295.02   81.39
  -3  15   6 1394.09  106.07
  -3  15   5 1968.58   64.32
   3  15  -5 1674.53   87.35
  -3  15   5 2130.73  112.43
  -3  15   4  117.47   44.01
   3  15  -4  120.18   65.88
  -3  15   4  201.73   66.64
  -3  15   3 1261.65   67.04
   3  15  -3 1226.37   84.96
  -3  15   3 1166.55  264.83
  -3  15   2  419.93   85.40
  -3  15   2  563.20   76.18
   3  15  -2  721.10   58.63
  -3  15   2  569.35  190.28
  -3  15   1 1885.66   66.92
  -3  15   1 2054.64   51.41
   3  15  -1 2255.15   99.26
  -3  15   1 1897.84  155.93
  -3  15   0  406.47   51.42
   3  15   0  463.82   29.63
  -3  15   0  491.06   71.31
  -3  15   0  453.38  153.41
   3  15   0  641.47  152.92
  -3  15  -1   91.56   17.13
   3  15   1  122.05   22.65
  -3  15  -1  112.33   32.77
   3  15   1  102.72   21.11
  -3  15  -1  127.57   44.17
   3  15   1  190.79   93.17
   3  15   2  532.97   58.93
  -3  15  -2  658.30   53.15
   3  15   2  529.27   90.45
   3  15   2  544.10  131.56
  -3  15  -2  617.89  115.46
   3 -15   2  382.72   32.97
   3  15   3 1217.91   52.27
  -3  15  -3 1200.59   74.23
   3  15   3 1250.66   43.54
   3  15   3 1411.63  207.31
  -3  15  -3 1114.94   59.54
   3 -15   3  994.76   35.29
  -3  15  -4  327.11   58.91
   3  15   4  369.40   71.40
  -3  15  -4  376.90   89.24
   3  15   4  498.23  132.58
  -3  15  -5  100.93   24.33
   3  15   5  172.47   49.03
  -3  15  -5   43.93   41.11
   3  15   5  180.01   60.99
  -3  15  -6   26.51   22.20
   3  15   6   46.69   21.15
  -3  15  -6   31.33   39.46
   3  15   6  114.68   84.72
  -3  15  -7  137.96   27.84
   3  15   7  126.18   35.56
  -3  15  -7  129.58   52.88
   3  15   7  121.29   88.51
  -3  15  -8  362.36   74.93
   3  15   8  417.68  122.25
  -3  15  -8  415.52  103.44
   3  15   8  539.90  142.35
  -3  15  -9  412.54  105.00
   3  15   9  501.80   66.34
  -3  15  -9  596.81  127.61
   3  15   9  796.82  190.90
  -3  15 -10   58.89   15.45
   3  15  10   34.41   35.54
  -3  15 -10   29.84   50.49
   3  15  10   57.72   71.25
   3  15  11  165.89   57.12
  -3  15 -11  141.51   64.06
   3  15  11  241.20  100.54
   3  15  12   18.21   20.92
  -3  15 -12   83.59   34.80
   3  15  12   95.65   87.80
   3  15  13  186.95  129.80
  -3  15 -13  242.80   59.20
   3  15  13  260.06  109.57
   3  15  14   31.55   45.25
  -3  15 -14    9.64   29.69
   3  15  14   87.11   42.37
   3  15  15   46.44   52.62
  -3  15 -15   21.18   39.88
   3  15  15   91.76   72.22
   3  15  16   99.43   44.61
   3  15  16  -21.16   64.37
   3 -15  16   55.58   57.77
   3  15  17   60.80   52.41
   3  15  17  -23.20   75.07
   3 -15  17  153.17   78.94
   3  15  18   80.82   60.19
   3 -15  18   87.14   46.27
  -3  17  18   58.53   44.35
  -3 -17  18  -19.40   32.94
  -3  17  17   29.02   43.42
  -3  17  17   40.23   58.01
  -3 -17  17   83.41   40.33
  -3  17  16  232.16   42.13
   3  17 -16  110.68   60.00
  -3  17  16  201.39  108.56
  -3  17  15  146.88   64.66
   3  17 -15   96.69   63.59
  -3  17  15  143.63   49.88
  -3  17  14  236.96   77.37
   3  17 -14  295.36  107.64
  -3  17  14  138.26   97.29
  -3  17  13   36.66   29.66
   3  17 -13   26.81   42.89
  -3  17  13    4.25   39.81
  -3  17  12  173.79   46.73
   3  17 -12  130.99   41.89
  -3  17  12  133.89   38.94
  -3  17  11   28.28   28.27
   3  17 -11   -8.49   51.06
  -3  17  11  108.17   47.18
  -3  17  10  470.32  166.64
   3  17 -10  619.29  197.28
  -3  17  10  443.24  155.65
  -3  17   9   45.91   23.36
   3  17  -9   27.20   21.84
  -3  17   9  -16.84   60.88
  -3  17   8 1323.05   50.07
   3  17  -8 1417.00  114.52
  -3  17   8 1516.36  116.16
  -3  17   7   18.39   17.87
   3  17  -7  -29.53   49.37
  -3  17   7   -4.40   67.46
  -3  17   6 4802.33   90.32
   3  17  -6 4653.79   97.38
  -3  17   6 4950.04  123.17
  -3  17   5  214.00   54.91
   3  17  -5  239.18   72.54
  -3  17   5  323.10   92.00
  -3  17   4   82.96   26.97
   3  17  -4  102.51   54.45
  -3  17   4   -0.83   52.93
  -3  17   3  671.51  120.53
   3  17  -3  637.78  149.84
  -3  17   3  747.96  185.76
  -3  17   2 1528.93   43.57
   3  17  -2 1416.20  109.45
  -3  17   2 1556.54  133.49
  -3  17   1  908.07  103.92
   3  17  -1 1063.81  105.07
  -3  17   1 1092.93  271.96
  -3  17   0   68.37   19.33
  -3  17   0   38.01   58.21
   3  17   0  114.11   52.37
  -3  17  -1  907.50   54.02
  -3  17  -1  943.67  212.77
   3  17   1  888.11   71.36
   3  17   2 1089.37   48.81
  -3  17  -2 1301.63  103.17
   3  17   2 1138.97   99.92
   3  17   3   38.50   15.59
  -3  17  -3   24.59   36.81
   3  17   3   96.03   59.12
   3  17   4  671.47   62.87
  -3  17  -4  711.94  142.09
   3  17   4  683.50  218.49
   3  17   5  329.36   79.84
  -3  17  -5  412.02   97.40
   3  17   5  388.06  165.46
   3  17   6  174.63   42.15
  -3  17  -6  241.83   55.54
   3  17   6  295.88   95.21
   3  17   7 1498.48   51.21
  -3  17  -7 1342.68  126.92
   3  17   7 1603.30  157.96
   3  17   8   20.14   19.55
  -3  17  -8  109.28   54.09
   3  17   8   64.36   36.51
   3  17   9  492.08   99.49
  -3  17  -9  625.67  135.86
   3  17   9  598.71  178.73
   3  17  10  716.25   76.93
  -3  17 -10  770.79   92.45
   3  17  10  650.48  268.08
   3  17  11   40.23   29.27
  -3  17 -11   18.41   39.87
   3  17  11  179.81   76.46
   3  17  12   22.64   28.65
  -3  17 -12  139.50   67.00
   3  17  12   87.62   65.14
   3  17  13  440.48  152.42
  -3  17 -13  492.22  131.10
   3  17  13  532.20  153.52
   3  17  14  197.92  101.40
  -3  17 -14  240.12   66.17
   3  17  14  141.08   97.99
   3  17  15   63.37   51.68
  -3  17 -15  160.42   65.78
   3  17  15  173.03  108.18
   3  17  16   -3.91   42.59
  -3  17 -16   70.10   33.37
   3  17  16  159.77   99.78
   3  17  17    0.95   39.56
  -3  19  17   38.15   27.67
   3  19 -17   32.69   47.64
  -3  19  16   35.84   30.46
   3  19 -16   42.10   18.56
  -3  19  15  617.36  151.65
   3  19 -15  369.81  258.17
  -3  19  15  620.07  272.25
  -3  19  14   57.95   32.31
   3  19 -14   16.03   20.09
  -3  19  14  123.15  102.93
  -3  19  13  108.74   60.51
   3  19 -13  131.93   40.19
  -3  19  13  162.18   46.37
  -3  19  12   54.66   42.85
   3  19 -12   55.57   43.58
  -3  19  12   48.62   65.24
  -3  19  11  133.07   37.55
   3  19 -11  137.77   52.21
  -3  19  11  206.19   53.52
  -3  19  10   98.47   45.53
   3  19 -10  176.19   66.31
  -3  19  10  101.36   87.64
  -3  19   9  225.98   66.79
   3  19  -9  160.92   59.50
  -3  19   9  170.66   94.04
  -3  19   8  260.55   77.52
   3  19  -8  292.07   80.84
  -3  19   8  416.76  125.69
  -3  19   7   25.88   15.99
   3  19  -7   72.92   52.23
  -3  19   7  -11.59   58.06
  -3  19   6  460.02  124.41
   3  19  -6  703.49  227.31
  -3  19   6  504.32  159.17
  -3  19   5    8.08   10.87
   3  19  -5   89.02   51.97
  -3  19   5  120.21   70.82
   3  19  -4  144.55   57.38
  -3  19   4   84.53   38.63
   3  19  -3 1021.59   80.62
  -3  19   3  999.31  101.14
   3  19  -2   50.24   31.88
  -3  19   2   84.63   52.89
   3  19  -1  104.37   45.42
  -3  19   1  144.12   68.15
  -3  19   0   97.16   70.18
   3  19   0  279.92   81.42
  -3  19  -1   99.16   63.64
   3  19   1  -17.94   59.00
  -3  19  -2   54.62   42.18
   3  19   2   30.20   30.95
  -3  19  -3   28.23   51.00
   3  19   3  -21.30   69.32
  -3  19  -4 1141.73  167.53
   3  19   4  930.28  277.47
  -3  19  -5   79.08   36.06
   3  19   5   26.74   34.98
  -3  19  -6  158.66  125.17
   3  19   6  215.83   74.42
  -3  19  -7  -29.89   53.19
   3  19   7   16.79   69.45
   3  19   8   23.49   26.76
  -3  19  -8   47.29   23.27
   3  19   8  -29.28   70.42
   3  19   9  416.96  123.78
  -3  19  -9  556.11  132.82
   3  19   9  444.71  176.87
   3  19  10  607.93  120.24
  -3  19 -10  639.15  170.05
   3  19  10  553.86  167.41
   3  19  11   67.72   37.10
  -3  19 -11  105.76   39.74
   3  19  11   22.10   40.40
   3  19  12   34.40   20.90
  -3  19 -12   50.74   23.60
   3  19  12  -74.90   64.38
   3  19  13  162.96   75.69
   3  19  13  184.15   55.76
   3  19  14   26.76   18.19
  -3  19 -14   -2.82   49.28
   3  19  14   38.64   43.82
   3  19  15   82.32   52.41
  -3  19 -15  103.61   71.83
   3  19  16   39.90   38.72
   3  21 -14   25.91   19.24
   3  21 -13  -83.14   40.63
   3  21 -12   33.44   25.43
  -3  21  12  116.37   76.22
   3  21 -11   88.29   55.81
  -3  21  11   64.62   43.52
   3  21 -10  115.38   40.04
  -3  21  10   27.60   67.62
   3  21  -9  484.67   94.29
  -3  21   9  156.09   83.01
   3  21  -8   37.56   36.95
  -3  21   8   68.51   39.17
   3  21  -7  127.15   54.98
  -3  21   7  121.47   57.75
   3  21  -6  376.86   67.50
  -3  21   6  292.19  134.19
   3  21  -5  452.57   74.74
  -3  21   5  523.07  170.45
   3  21  -4   73.32   23.03
  -3  21   4   47.76   65.66
   3  21  -3  649.20  216.45
  -3  21   3  687.61  163.25
   3  21  -2  404.46  122.40
  -3  21   2  376.98   98.12
   3  21  -1   53.95   35.23
  -3  21   1   77.51   64.51
  -3  21   0  165.93   58.28
   3  21   0  113.03   33.00
  -3  21  -1   36.35   43.72
   3  21   1    3.27   22.99
  -3  21  -2   47.18   75.94
   3  21   2  161.96  116.19
  -3  21  -3   -3.75   65.62
   3  21   3   61.28   38.82
  -3  21  -4  813.12  178.03
   3  21   4  747.31  271.92
  -3  21  -5   48.18   32.03
   3  21   5   71.80   64.68
  -3  21  -6   47.29   59.76
   3  21   6   21.99   39.29
  -3  21  -7  -91.37   60.89
   3  21   7   64.78   58.08
  -3  21  -8   54.71   50.52
   3  21   8   87.68   47.28
  -3  21  -9  317.39   84.44
   3  21   9  179.90   69.46
  -3  21 -10  123.72   42.76
   3  21  10  108.72   39.47
  -3  21 -11   84.38   31.34
   3  21  11   32.67   61.51
  -3  21 -12  -93.75   46.24
  -3  21 -13   66.08   46.08
   3  23 -11  528.61  156.49
   3  23 -10   36.90   30.53
   3  23  -9   90.36   54.50
  -3  23   9   52.73   31.78
   3  23  -8  101.56   27.15
  -3  23   8   91.52   37.27
   3  23  -7  308.43   86.16
  -3  23   7  355.28  154.52
   3  23  -6   51.61   40.02
  -3  23   6   11.77   68.93
   3  23  -5  347.62   93.63
  -3  23   5  346.20  156.30
   3  23  -4  236.78  110.12
  -3  23   4  272.24  108.88
   3  23  -3   72.69   76.04
  -3  23   3   53.63   46.42
   3  23  -2   -5.98   58.99
  -3  23   2  123.74   69.42
  -3  23   1  339.87  125.48
   3  23  -1  240.42  132.54
  -3  23   0   88.82   60.60
   3  23   0  228.69  131.61
  -3  23  -1  -50.05   61.27
   3  23   1   52.66   36.55
  -3  23  -2   57.38   71.90
   3  23   2   11.12   75.48
  -3  23  -3  -67.02   64.42
   3  23   3  -40.07   70.80
  -3  23  -4   62.94   51.38
   3  23   4   55.12   56.71
  -3  23  -5  273.52  107.32
   3  23   5  166.43   68.10
  -3  23  -6  196.29   96.79
   3  23   6   74.75   41.85
  -3  23  -7   99.56   48.39
   3  23   7   81.32   73.86
  -3  23  -8  273.78   67.06
   3  23   8  222.48   99.52
  -3  23  -9   79.79   62.19
   3  25  -6  -29.25   48.19
   3  25  -5  489.76  142.11
   3  25  -4   13.48   24.07
  -3  25   4   51.37   29.97
   3  25  -3   17.78   54.40
  -3  25   3   81.01   41.02
   3  25  -2   43.60   55.50
  -3  25   2   59.86   59.58
   3  25  -1  107.14   70.58
  -3  25   1  104.23   64.58
  -3  25   0   67.74   73.95
   3  25   0   30.37   41.60
  -3  25  -1  -93.37   58.56
   3  25   1  -26.48   61.51
  -3  25  -2  116.84   50.25
   3  25   2  179.68   60.01
  -3  25  -3   91.73   43.05
   3  25   3  131.50   52.72
  -3  25  -4   81.94   47.13
   3  25   4   76.90   28.05
  -4   0  23  -24.22   37.35
   4   0 -22   52.73   34.39
  -4   0  22  -18.45   40.35
   4   0 -21  -46.10   60.34
  -4   0  21   56.56   33.91
   4   0 -20 1315.16   91.05
  -4   0  20 1471.30  154.88
   4   0 -19  -24.40   52.70
  -4   0  19   25.17   19.24
   4   0 -18  247.38  105.37
  -4   0  18  201.65   62.93
   4   0 -17   42.60   33.45
  -4   0  17   53.87   29.51
   4   0 -16  337.36   97.18
  -4   0  16  284.31   56.66
   4   0 -15  101.20   53.25
  -4   0  15  -14.47   47.42
   4   0 -14 2110.65   82.56
  -4   0  14 2315.41  143.12
   4   0 -13  -18.75   42.59
  -4   0  13   31.60   47.21
   4   0 -12  908.35   53.63
  -4   0  12 1083.68  102.42
   4   0 -11   21.37   18.51
  -4   0  11  -10.13   22.13
   4   0 -10  620.77   85.28
  -4   0  10  694.61  115.65
   4   0  -9   13.50   26.59
  -4   0   9   93.16   58.07
   4   0  -810923.23  195.10
  -4   0   811507.75  168.50
   4   0  -7    7.37   21.02
  -4   0   7  -18.51   31.33
  -4   0   7   42.42   25.57
   4   0  -7   16.09   12.87
   4   0  -6 9689.69  208.90
  -4   0   6 9745.92  197.43
  -4   0   610044.20  199.68
   4   0  -6 9293.41  184.96
   4   0  -5   21.33   19.22
  -4   0   5   15.07   17.84
  -4   0   5   -7.08   25.06
   4   0  -5   29.49   20.62
  -4   0   427991.46  183.04
  -4   0   427735.90  167.25
  -4   0   3   42.65   22.24
   4   0  -3   47.37   17.45
  -4   0   3   33.76   17.76
   4   0  -3   33.90   11.88
  -4   0   2  375.62   26.97
   4   0  -2  396.05   43.48
  -4   0   2  364.31   27.87
   4   0  -2  419.82   31.67
  -4   0   1   28.03   16.48
   4   0  -1  -10.75   12.89
  -4   0   1   -2.00    4.03
  -4   0  -1   22.52   12.69
   4   0   1   54.54   32.20
   4   0   1   11.55   14.76
  -4   0  -1   29.93   22.47
  -4   0  -2   17.68   33.90
   4   0   2    9.13   21.56
   4   0   2   43.57   19.46
  -4   0  -2   77.23   31.47
  -4   0  -3   37.81   16.18
   4   0   3   35.76   19.69
   4   0   3   14.46   24.12
  -4   0  -3   -2.64   15.27
  -4   0  -4  139.14   33.57
   4   0   4  109.04   51.52
   4   0   4  164.87   48.17
  -4   0  -4   80.65   31.88
  -4   0  -5   81.68   35.59
   4   0   5   28.29   20.74
   4   0   5   48.52   32.53
  -4   0  -5  -24.73   25.81
  -4   0  -6 1812.89   64.36
   4   0   6 1703.71   56.62
   4   0   6 1777.89   76.41
  -4   0  -6 1590.59   73.22
  -4   0  -7   22.31   24.13
   4   0   7   50.91   38.26
  -4   0  -8  738.42   58.13
   4   0   8  880.51  141.63
  -4   0  -9   86.61   52.16
   4   0   9   13.89   19.34
  -4   0 -10   40.75   66.40
   4   0  10   55.00   46.98
  -4   0 -11   39.51   32.16
   4   0  11   31.10   20.33
  -4   0 -12  -35.44   47.78
   4   0  12  150.06   61.07
  -4   0 -13  -37.26   56.46
   4   0  13   31.36   37.67
  -4   0 -14 2002.68  121.57
   4   0  14 1971.95  124.95
  -4   0 -15   -0.06   56.88
   4   0  15   13.76   54.41
  -4   0 -16  595.12  149.46
   4   0  16  514.74  186.54
  -4   0 -17   83.81   38.92
   4   0  17   27.15   36.67
  -4   0 -18   80.37   36.26
   4   0  18  103.56   28.64
  -4   0 -19   -6.17   47.07
   4   0  19   52.51   43.44
  -4   0 -20  153.93   52.87
   4   0  20  122.71   54.01
  -4   0 -21  -63.77   61.69
   4   0  21   19.77   43.28
   4   0  22   75.42   40.01
  -4   2  23   40.83   37.60
  -4  -2  23  -56.42   53.70
  -4  -2  23   66.36   29.45
   4   2 -22   62.66   37.84
  -4   2  22   92.41   58.08
  -4   2  22   70.60   45.60
  -4  -2  22  174.94  105.08
  -4   2  21   91.16   62.88
   4   2 -21   46.86   32.97
   4  -2 -21   64.45   57.47
  -4  -2  21   55.46   42.10
  -4   2  20 1318.71  149.49
   4   2 -20 1145.09   83.96
   4  -2 -20 1120.83  292.40
  -4  -2  20 1008.91   98.72
  -4   2  19  769.87  140.49
   4   2 -19  638.10  157.37
   4  -2 -19  750.66  226.89
  -4  -2  19  668.76  202.84
  -4   2  18   75.20   37.34
   4   2 -18   17.06   44.93
   4  -2 -18    3.53   37.36
  -4  -2  18   62.91   31.35
  -4   2  17   43.96   30.20
   4   2 -17   41.09   37.39
   4  -2 -17   77.29   45.47
  -4  -2  17   35.38   33.08
  -4   2  16  524.09  100.91
   4   2 -16  303.87   92.08
   4  -2 -16  150.68   55.96
  -4  -2  16  439.56  105.77
  -4   2  15 2284.53  166.71
   4   2 -15 2020.63  113.67
   4  -2 -15 2105.88   75.46
  -4  -2  15 2316.82  145.88
  -4   2  14   58.85   40.58
   4   2 -14   86.56   36.86
   4  -2 -14   58.74   54.40
  -4  -2  14   38.27   45.90
  -4   2  13   34.65   34.74
   4   2 -13   50.44   27.26
   4  -2 -13   53.75   28.67
  -4  -2  13   -1.23   44.70
  -4   2  12 2377.99  170.16
   4   2 -12 1853.74  125.43
   4  -2 -12 2045.75  133.32
  -4  -2  12 1829.53  146.10
  -4   2  11  906.71   80.03
   4   2 -11  659.99   46.43
   4  -2 -11 1041.98   89.04
  -4  -2  11 1025.66  125.25
  -4   2  10    9.38   21.24
   4   2 -10   25.40   35.50
   4  -2 -10  -20.40   47.16
  -4  -2  10   45.94   24.12
  -4   2   9  666.23  141.41
   4   2  -9  557.18   44.64
   4  -2  -9  534.60  171.34
  -4  -2   9  528.80   74.68
   4   2  -8 5634.34  191.81
  -4   2   8 5573.08  153.87
   4  -2  -8 5617.89  147.83
  -4  -2   8 5134.15  127.27
   4  -2  -8 5324.92  137.00
  -4  -2   8 5611.90  169.16
  -4   2   7  861.07   57.45
   4   2  -7  708.75   39.08
   4  -2  -7  861.06   98.09
  -4  -2   7  663.54   75.07
  -4  -2   7  815.00   46.13
   4  -2  -7  915.90   59.07
  -4  -2   7  863.99   49.78
  -4   2   6 2575.72   50.20
   4   2  -6 2562.31   91.01
  -4   2   6 2460.89  121.53
  -4  -2   6 2686.80   81.37
  -4  -2   6 2491.10   67.36
   4  -2  -6 2288.76   87.60
   4  -2  -6 2454.42   79.47
  -4  -2   6 2710.01   77.40
   4   2  -5 4886.81  120.24
  -4   2   5 5473.31   55.63
   4  -2  -5 4931.98  128.10
  -4  -2   5 4837.73  115.81
   4  -2  -5 5413.80   52.63
   4   2  -4 9996.98  196.51
  -4   2   4 9308.82  184.47
   4   2  -4 9870.65  191.73
  -4   2   4 9732.15  194.40
  -4   2   4 9921.60  215.86
  -4  -2   4 9813.53  189.32
  -4  -2   410077.53  200.66
   4  -2  -4 9963.31  193.68
  -4   2   338947.29  245.35
   4   2  -339147.58  226.87
   4  -2  -339567.03  243.50
  -4  -2   338623.18  226.51
  -4  -2   337919.52  221.21
   4  -2  -339975.28  234.48
   4   2  -219932.45  125.16
  -4   2   219363.88  133.12
   4   2  -219398.89  133.45
  -4  -2   219582.62  120.89
   4  -2  -219739.42  137.02
   4  -2  -220684.26  132.94
  -4   2   1 4319.44  106.54
   4   2  -1 4312.99  110.36
  -4   2   1 4560.74  111.28
   4   2  -1 4514.63  111.93
   4  -2  -1 4211.33  102.61
   4  -2  -1 4486.36  111.49
  -4  -2   1 4406.44  111.71
  -4  -2   1 4528.57  106.92
   4   2   019164.24  125.53
   4   2   018925.43  119.19
  -4   2   018948.05  138.08
   4  -2   019220.47  133.75
   4  -2   018896.77  132.96
  -4  -2   019083.93  119.27
  -4  -2   019180.20  142.34
  -4   2  -1 3622.26  136.27
   4   2   1 3371.26   84.01
  -4   2  -1 3323.46  104.56
   4   2   1 3391.02  126.67
   4  -2   1 3363.99   84.86
   4  -2   1 3313.60   92.40
  -4  -2  -1 3404.34   84.94
  -4  -2  -1 3090.68   77.88
  -4   2  -221404.29  170.59
   4   2   222914.41  155.09
   4  -2   222486.50  146.16
   4  -2   221544.01  141.97
  -4  -2  -223293.57  150.97
   4   2   315783.01  115.53
  -4   2  -314325.24  113.10
   4  -2   315601.45  114.16
  -4  -2  -315537.63  137.32
  -4   2  -4  577.26   46.30
   4   2   4  546.95   32.97
  -4   2  -4  441.00  116.64
   4   2   4  523.39  117.02
   4  -2   4  518.56   57.17
   4  -2   4  263.34   78.13
  -4  -2  -4  540.64   40.71
  -4  -2  -4  436.95   85.54
   4   2   5  -33.95   40.20
  -4   2  -5   21.59   15.19
   4   2   5   18.04   10.93
   4  -2   5   -0.86   33.03
   4  -2   5   42.64   25.03
  -4  -2  -5   32.77   24.17
  -4  -2  -5    1.21   14.81
   4  -2   5  -13.56   40.03
   4   2   6  151.53   45.24
  -4   2  -6  236.28   51.75
  -4  -2  -6  151.13   36.82
   4  -2   6   72.05   33.25
   4  -2   6  159.37   39.98
   4  -2   6  251.57   59.41
   4   2   7 2832.50  157.09
  -4   2  -7 2700.67  114.98
  -4  -2  -7 2714.84  128.68
   4  -2   7 2716.57  103.79
   4   2   8   -3.21   42.17
  -4   2  -8   -6.88   40.63
  -4  -2  -8   46.07   36.05
   4  -2   8   56.48   32.46
   4   2   9   69.39   37.72
  -4   2  -9  153.94   54.17
  -4  -2  -9   93.19   42.76
   4  -2   9   56.96   33.10
   4   2  10 1223.16  261.03
  -4   2 -10 1223.60   63.90
  -4  -2 -10  999.54   56.91
   4  -2  10 1482.23  171.06
   4   2  11 1598.63   76.97
  -4   2 -11 1376.23   59.98
  -4  -2 -11 1380.10  170.69
   4  -2  11 1504.71  100.88
   4   2  12 1071.74   86.26
  -4   2 -12 1019.87  122.82
  -4  -2 -12 1063.03   77.59
   4  -2  12 1075.58   79.26
   4   2  13 9132.34  230.75
  -4   2 -13 8561.89  270.99
  -4  -2 -13 8741.30  232.11
   4  -2  13 8464.04  201.73
   4   2  14  -48.16   58.24
  -4   2 -14   12.86   61.69
  -4  -2 -14   58.77   53.42
   4  -2  14   75.82   49.01
   4   2  15 1296.31  114.58
  -4   2 -15 1244.45   85.64
  -4  -2 -15 1224.39  185.25
   4  -2  15 1426.55  146.43
   4   2  16   87.74   40.86
  -4   2 -16   -3.03   26.73
  -4  -2 -16   21.90   27.57
   4  -2  16   56.72   54.79
   4   2  17  -13.90   53.58
  -4   2 -17   67.11   21.39
  -4  -2 -17  -20.38   71.75
   4  -2  17  157.50   42.99
   4   2  18   40.45   32.36
  -4   2 -18  127.50   39.02
  -4  -2 -18   96.50   45.87
   4  -2  18  159.23   60.69
   4   2  19  124.77   50.59
  -4   2 -19   30.42   25.85
  -4  -2 -19  -48.28   57.13
   4  -2  19   83.23   32.76
   4   2  20  123.19   73.18
  -4   2 -20   57.44   28.52
  -4  -2 -20   39.01   43.16
   4  -2  20   72.07   51.80
   4   2  21  366.83  167.55
  -4   2 -21  478.81  126.84
  -4  -2 -21  354.77  120.77
   4  -2  21  302.32  123.11
   4   2  22   75.04   31.06
   4  -2  22   52.01   57.18
  -4   4  23  -37.94   43.77
  -4  -4  23   20.95   42.41
  -4  -4  23   36.81   31.29
   4   4 -22   84.93   53.77
  -4   4  22   72.36   69.84
  -4   4  22  143.74   35.95
  -4  -4  22   14.54   21.43
   4   4 -21  308.56  107.04
  -4   4  21  395.07  131.82
  -4   4  21  324.73  176.70
  -4  -4  21  361.63  100.05
  -4   4  20  179.66   73.47
   4   4 -20  181.97   74.48
   4  -4 -20  307.58   93.73
  -4  -4  20  163.95   35.86
  -4   4  19  110.76   32.74
   4   4 -19  103.39   78.93
   4  -4 -19  172.58   49.37
  -4  -4  19  168.03   55.56
  -4   4  18  109.61   60.23
   4   4 -18   55.30   39.59
   4  -4 -18  -40.81   69.13
  -4  -4  18   78.38   34.74
  -4   4  17   46.82   40.30
   4   4 -17  -23.13   54.45
   4  -4 -17   74.85   24.88
  -4  -4  17  -38.32   38.32
  -4   4  16   87.37   52.96
   4   4 -16   75.25   37.90
   4  -4 -16   74.32   62.08
  -4  -4  16   47.16   21.53
  -4   4  15  828.04   76.46
   4   4 -15  803.28   59.35
   4  -4 -15  989.52  301.08
  -4  -4  15  669.20  153.51
  -4   4  14 4008.12  201.09
   4   4 -14 3866.83  101.18
   4  -4 -14 4054.53  109.10
  -4  -4  14 4044.94  110.48
  -4   4  13  344.94   77.22
   4   4 -13  142.97   58.70
   4  -4 -13  146.22   59.67
  -4  -4  13   58.31   42.95
  -4   4  12  107.99   35.62
   4   4 -12  219.17   54.43
   4  -4 -12  127.16   75.15
  -4  -4  12  195.81   66.42
  -4   4  11   94.30   42.93
   4   4 -11  177.01   59.38
   4  -4 -11  116.29   40.95
  -4  -4  11   62.92   23.51
  -4   4  10 4782.40  147.06
   4   4 -10 4385.55  195.50
   4  -4 -10 4454.27  146.82
  -4  -4  10 4121.75  124.17
  -4   4   9  736.01   55.02
   4   4  -9  595.29   48.57
   4  -4  -9  736.99  164.82
  -4  -4   9  646.50   71.15
  -4   4   8  598.02   41.05
   4   4  -8  565.88   67.80
   4  -4  -8  494.46   40.90
  -4  -4   8  450.66   24.96
  -4  -4   8  531.83   42.90
  -4   4   7 4060.87  118.37
   4   4  -7 4093.55  157.90
   4   4  -7 3966.02  115.47
  -4  -4   7 3922.87   63.65
  -4  -4   7 3565.56  122.29
   4  -4  -7 3666.98  116.05
   4  -4  -7 3921.08  109.97
   4   4  -6 5895.80  171.16
  -4   4   6 5720.72  143.59
   4   4  -6 5759.08  144.28
  -4   4   6 6232.93  158.36
  -4  -4   6 5680.30  150.00
  -4  -4   6 5342.67  137.99
   4  -4  -6 5827.42  145.28
   4   4  -5 1634.04   56.64
  -4   4   5 1753.70   63.20
   4   4  -5 1612.28   63.36
  -4   4   5 1818.22   80.71
  -4   4   5 1794.54   73.04
  -4  -4   5 1594.04   56.92
  -4  -4   5 1637.65   53.53
   4  -4  -5 1814.89  121.60
   4   4  -4  880.70   79.11
  -4   4   4  817.51   49.43
   4   4  -4  887.02   70.78
  -4   4   4  847.53   37.25
  -4   4   4  870.95   60.96
  -4  -4   4  847.77   55.93
  -4  -4   4  860.57   54.88
   4  -4  -4  837.72   57.77
   4   4  -3  953.68   34.49
  -4   4   3 1007.12   43.26
  -4   4   3 1085.34   63.76
   4  -4  -3 1018.17   45.05
  -4  -4   3  894.96   26.72
  -4  -4   3  839.31   57.84
  -4  -4   3  878.96   30.49
   4  -4  -3 1033.33   43.61
  -4   4   2 2729.23  111.50
  -4   4   2 2890.63   81.68
   4   4  -2 2788.58   74.55
   4  -4  -2 2591.58   70.23
  -4  -4   2 2422.21   59.65
  -4  -4   2 2734.04   97.23
  -4  -4   2 2653.41   66.22
   4  -4  -2 2818.77   76.01
  -4   4   1 1268.11   37.61
   4   4  -1 1419.29   47.52
  -4   4   1 1258.57   45.81
   4   4  -1 1392.22   62.80
   4  -4  -1 1294.93   47.34
   4  -4  -1 1241.78   47.21
  -4  -4   1 1407.72   45.47
  -4  -4   1 1249.68   36.82
  -4   4   0   66.36   34.57
   4   4   0  102.60   22.30
  -4   4   0  118.26   45.21
   4   4   0   65.61   22.64
   4  -4   0   73.40   31.91
   4  -4   0   12.59   15.58
  -4  -4   0   97.95   17.38
  -4  -4   0   97.30   38.78
  -4   4  -1 2364.67   76.51
   4   4   1 2287.35   72.83
  -4   4  -1 2411.00  106.79
   4   4   1 2465.68   92.80
   4  -4   1 2428.61   84.66
   4  -4   1 2366.46  109.11
  -4  -4  -1 2253.01   68.45
  -4  -4  -1 2141.25   74.79
  -4   4  -237636.66  230.92
   4   4   237173.33  226.18
  -4   4  -235113.03  228.02
  -4  -4  -237505.85  238.76
  -4  -4  -236746.67  235.86
  -4   4  -3   64.73   32.75
   4   4   3   73.33   32.60
  -4   4  -3   44.67   34.41
   4   4   3   12.68   34.51
   4  -4   3   69.07   38.58
   4  -4   3   42.56   31.77
  -4  -4  -3   50.97   34.87
  -4  -4  -3   83.98   30.37
  -4   4  -4 8098.50  166.30
   4   4   4 7455.83  151.48
  -4   4  -4 7265.32  155.48
   4   4   4 7969.56  170.01
   4  -4   4 7534.58  153.23
   4  -4   4 7025.45  185.93
  -4  -4  -4 7447.82  155.16
  -4  -4  -4 7423.28  154.97
  -4   4  -5  808.42   51.38
   4   4   5  700.56   91.24
  -4   4  -5  716.58  161.63
   4   4   5  618.77  181.71
   4  -4   5  817.17   33.89
   4  -4   5  693.34  146.90
  -4  -4  -5  722.99   39.08
  -4  -4  -5  750.67   38.16
   4   4   6  198.90   81.32
  -4   4  -6  197.17   98.74
  -4   4  -6  142.65   68.85
  -4  -4  -6  143.72   48.21
   4  -4   6  238.52   51.17
  -4   4  -7  -13.09   44.56
  -4   4  -7   94.27   45.14
   4   4   7  135.79   48.27
  -4  -4  -7  124.74   47.53
   4   4   8  127.66   34.08
  -4   4  -8  216.27   88.84
  -4  -4  -8   80.51   38.50
   4  -4   8  156.22   33.63
   4   4   9  535.74  110.49
  -4   4  -9  387.92  114.86
  -4  -4  -9  410.66  121.29
   4  -4   9  423.55   87.57
   4   4  10  395.01   85.34
  -4   4 -10  266.01   64.10
  -4  -4 -10  238.31   66.44
   4  -4  10  258.44   48.30
   4   4  11 1454.39   84.62
  -4   4 -11 1250.75  159.38
  -4  -4 -11 1437.15   71.69
   4  -4  11 1456.32  171.68
   4   4  12  113.28   56.06
  -4   4 -12  108.38   50.08
  -4  -4 -12   54.61   61.78
   4  -4  12  200.11   72.51
   4   4  13  949.42   87.25
  -4   4 -13  794.18  231.21
  -4  -4 -13  924.73  157.51
   4  -4  13  855.58  211.48
   4   4  14 1008.29  205.71
  -4   4 -14  931.11   87.98
  -4  -4 -14 1150.56  218.29
   4  -4  14  847.48  196.47
   4   4  15 1586.23  121.01
  -4   4 -15 1603.27  125.94
  -4  -4 -15 1639.53  269.78
   4  -4  15 1432.74  253.77
   4   4  16  214.25  120.20
  -4   4 -16  352.06  106.47
  -4  -4 -16  334.06   95.64
   4  -4  16  144.47   78.67
   4   4  17  385.37  109.84
  -4   4 -17  536.06  107.78
  -4  -4 -17  209.15   91.13
   4  -4  17  318.30  127.06
   4   4  18   38.58   20.24
  -4   4 -18  -73.41   52.98
  -4  -4 -18  -10.52   65.98
   4  -4  18   79.69   29.03
   4   4  19  149.86  105.33
  -4   4 -19  658.89  155.31
  -4  -4 -19  508.20  114.29
   4  -4  19  429.22  108.93
   4   4  20   25.48   47.75
  -4   4 -20   28.66   31.44
  -4  -4 -20   40.68   32.30
   4  -4  20   63.99   63.54
   4   4  21   86.02   41.54
  -4   4 -21   74.25   22.04
  -4  -4 -21   -5.59   64.72
   4  -4  21   94.43   58.73
   4  -4  22   -3.53   52.59
  -4   6  23   97.69   89.69
  -4  -6  23   57.72   38.34
  -4  -6  23  171.42   50.24
   4   6 -22  418.55  148.80
  -4   6  22  324.82  169.35
  -4  -6  22  770.80  222.19
   4   6 -21   70.60   29.85
  -4   6  21   94.08   43.07
  -4   6  21  124.01   59.55
  -4  -6  21  -14.80   38.57
   4   6 -20  522.62  178.06
  -4   6  20  462.47  199.34
  -4   6  20  617.38  211.59
  -4  -6  20  488.05  200.23
   4   6 -19  204.32   87.91
  -4   6  19  151.82  101.60
  -4   6  19  116.44   73.50
  -4  -6  19   77.55   50.47
  -4   6  18  112.96   49.01
   4   6 -18   66.37   29.31
   4  -6 -18   78.02   48.89
  -4  -6  18  111.37   41.07
  -4   6  17   53.79   40.40
   4   6 -17  128.98   29.67
   4  -6 -17   53.56   42.56
  -4  -6  17  118.33   30.71
  -4   6  16   25.10   38.94
   4   6 -16    8.31   19.78
   4  -6 -16  -17.73   63.04
  -4  -6  16   25.13   18.45
  -4   6  15  107.18   43.78
   4   6 -15   73.19   37.96
   4  -6 -15  132.21   64.64
  -4  -6  15   31.70   54.35
  -4   6  14  609.43  127.67
   4   6 -14  634.35  198.04
   4  -6 -14  551.19  114.47
  -4  -6  14  631.92  167.39
  -4   6  13  503.71  137.38
   4   6 -13  372.36   94.27
   4  -6 -13  380.81   66.84
  -4  -6  13  492.59   87.77
  -4   6  12 3403.85  185.99
   4   6 -12 3042.76  144.62
   4  -6 -12 3106.60  116.03
  -4  -6  12 2966.00   88.02
  -4   6  11  -41.40   47.29
   4   6 -11   -9.80   30.23
   4  -6 -11   71.10   45.70
  -4  -6  11   77.33   38.05
   4   6 -10  102.22  111.63
   4   6 -10   79.92   24.69
  -4   6  10   60.24   46.70
   4  -6 -10   96.22   53.88
   4   6  -9 1675.72  155.29
   4   6  -9 1643.54   48.02
  -4   6   9 1854.25   66.85
   4  -6  -9 1489.65   57.89
   4   6  -8  113.39   28.69
  -4   6   8   72.77   29.67
   4   6  -8   90.37   51.05
  -4  -6   8   69.10   24.96
   4   6  -7 3590.79  102.20
   4   6  -7 3584.72  105.32
  -4   6   7 3288.06   99.82
  -4   6   7 3723.78  170.88
  -4  -6   7 3534.15  102.09
  -4  -6   7 3473.98   97.23
   4   6  -6 9631.69  135.41
   4   6  -6 9677.98  178.47
  -4   6   610290.34  210.23
  -4   6   610600.23  159.98
  -4  -6   6 9280.00  163.52
  -4  -6   6 9970.09  145.61
   4   6  -5 5509.66  131.80
  -4   6   5 5908.71  146.69
   4   6  -5 5513.72  140.72
  -4   6   5 5942.35  151.65
  -4   6   5 6473.64  164.23
  -4  -6   5 5288.07  130.84
  -4  -6   5 5811.50  144.03
   4  -6  -5 6070.88  175.95
  -4   6   4 4685.59  123.38
   4   6  -4 4853.39  128.98
  -4   6   4 4862.01  126.93
  -4   6   4 5131.16  212.71
  -4  -6   4 4637.16  116.26
  -4  -6   4 4823.11  121.69
   4  -6  -4 4887.58  124.22
  -4   6   3  164.91   64.37
  -4   6   3  196.16   85.57
   4   6  -3  263.51   58.58
   4  -6  -3  201.40   41.91
  -4  -6   3  228.89   24.25
  -4  -6   3  245.41   43.11
  -4  -6   3  218.32   24.06
   4  -6  -3  226.48   35.90
  -4   6   2 4616.62  113.40
  -4   6   2 4732.91  122.60
   4   6  -2 4858.04  127.75
   4  -6  -2 4199.47  105.46
  -4  -6   2 4740.65  144.19
   4  -6  -2 4494.94  112.41
   4   6  -1 1867.41   77.84
   4   6  -1 1705.88   51.69
  -4   6   1 1766.57   62.03
  -4   6   1 1780.50   86.95
   4  -6  -1 1609.07  107.91
  -4  -6   1 1576.23   45.55
   4  -6  -1 1726.76   74.63
  -4  -6   1 1617.57   61.21
  -4   6   0 2904.16  114.52
   4   6   0 2957.93   69.94
  -4   6   0 3020.12   91.85
   4   6   0 2931.34  134.43
   4  -6   0 2670.51   81.66
   4  -6   0 2787.00   99.14
  -4  -6   0 2781.05   66.50
  -4  -6   0 2759.29   80.68
  -4   6  -1 4923.23  118.97
   4   6   1 5176.85  120.42
  -4   6  -1 4993.23  170.97
   4   6   1 5313.16  141.94
   4  -6   1 4475.46  109.41
   4  -6   1 4854.65  121.59
  -4  -6  -1 4999.63  126.18
  -4  -6  -1 4949.16  134.10
  -4   6  -2 1822.34   80.25
   4   6   2 1699.69   75.55
  -4   6  -2 1494.81   86.40
   4   6   2 1856.69   81.53
   4  -6   2 1713.95   81.50
   4  -6   2 1572.91   64.73
  -4  -6  -2 1630.55   69.90
  -4  -6  -2 1660.84   68.00
  -4   6  -3 4887.87  151.97
   4   6   3 4579.64  112.65
  -4   6  -3 4642.60  151.84
   4   6   3 4751.53  129.41
   4  -6   3 4661.64  138.07
   4  -6   3 4644.50  150.64
  -4  -6  -3 4649.13  136.38
  -4  -6  -3 4637.19  123.55
   4   6   4 3902.16  135.08
   4   6   4 3795.50  125.82
  -4   6  -4 4018.26  103.08
  -4   6  -4 3640.02  177.88
   4  -6   4 3776.78  112.92
  -4  -6  -4 3752.17  126.47
   4   6   5 2470.12  124.44
   4   6   5 2412.28   81.84
  -4   6  -5 2452.28  123.19
  -4   6  -5 2163.46   85.98
   4  -6   5 2103.41   68.65
  -4  -6  -5 2358.19   84.00
   4   6   6   38.17   27.75
  -4   6  -6   86.12   47.02
  -4   6  -6  -10.59   40.39
  -4  -6  -6   39.07   26.85
   4  -6   6   67.42   35.30
  -4   6  -7  103.91   38.10
  -4   6  -7   79.18   49.14
   4   6   7   43.86   28.02
  -4  -6  -7   35.92   34.65
  -4   6  -8  342.98   88.66
  -4   6  -8  462.21  116.60
   4   6   8  426.07  113.62
  -4  -6  -8  425.87  124.76
  -4   6  -9  654.07  157.05
  -4   6  -9  589.80  159.43
   4   6   9  736.23  140.74
  -4  -6  -9  658.22  195.49
   4   6  10 2549.37   91.26
  -4   6 -10 2432.86  123.87
  -4  -6 -10 2406.87   93.24
   4  -6  10 2475.56  108.63
   4   6  11 1636.15   87.25
  -4   6 -11 1724.71   82.71
  -4  -6 -11 1718.08  122.41
   4  -6  11 1454.85  168.42
   4   6  12   53.61   50.83
  -4   6 -12   26.74   43.53
  -4  -6 -12   98.14   55.39
   4  -6  12   43.18   34.96
   4   6  13   91.41   63.80
  -4   6 -13   83.97   62.51
  -4  -6 -13   41.82   30.25
   4  -6  13   66.33   23.86
   4   6  14  354.21  181.76
  -4   6 -14  425.99  101.11
  -4  -6 -14  322.82   88.45
   4  -6  14  510.22  122.30
   4   6  15  452.57  171.10
  -4   6 -15  408.26  117.81
  -4  -6 -15  477.77  124.03
   4  -6  15  337.19   84.92
   4   6  16  -92.33   55.44
  -4   6 -16  -32.84   51.10
  -4  -6 -16   43.24   40.39
   4  -6  16  -40.29   58.74
   4   6  17  102.12   43.84
  -4   6 -17   32.24   40.97
  -4  -6 -17   83.96   39.43
   4  -6  17   64.90   48.71
   4   6  18  101.44   47.21
  -4   6 -18   98.02   43.65
  -4  -6 -18   95.31   61.16
   4  -6  18   12.46   37.23
   4   6  19  669.58  237.25
  -4   6 -19  674.77  186.10
  -4  -6 -19  566.81   80.82
   4  -6  19  499.90  170.35
   4   6  20   49.45   54.87
  -4   6 -20  297.03   69.90
  -4  -6 -20  157.88   57.85
   4  -6  20   71.99   53.93
  -4   6 -21   98.82   36.95
   4   6  21   83.88   27.89
   4  -6  21  110.16   57.17
  -4   8  22   59.42   37.53
  -4  -8  22   22.81   26.10
  -4  -8  22  149.24  100.45
   4   8 -21  188.09   46.87
  -4   8  21  233.91   75.21
  -4   8  21  131.65   70.69
  -4  -8  21    7.13   38.75
   4   8 -20   41.50   29.75
  -4   8  20   54.06   40.04
  -4   8  20   29.91   71.16
  -4  -8  20   49.73   32.64
   4   8 -19   90.00   48.34
  -4   8  19    0.06   57.21
  -4   8  19   94.49   60.41
  -4  -8  19   47.78   25.34
   4   8 -18    0.05   34.88
  -4   8  18  -18.63   57.41
  -4   8  18   -8.14   60.80
  -4  -8  18   -4.90   38.00
   4   8 -17  689.61  210.76
  -4   8  17 1026.02  102.59
  -4   8  17  947.96  216.50
  -4  -8  17  826.01  208.70
   4   8 -16  430.41  162.31
  -4   8  16  515.93  168.23
  -4   8  16  603.48  136.30
  -4  -8  16  429.32  136.33
   4   8 -15 1150.47   99.72
  -4   8  15 1362.20   98.49
  -4   8  15 1615.12  108.86
  -4  -8  15 1320.73  122.43
   4   8 -14  -32.39   31.81
  -4   8  14   10.30   34.95
  -4   8  14   54.00   30.71
  -4  -8  14   72.85   39.89
   4   8 -13 2029.91   59.91
  -4   8  13 2526.20  134.81
  -4   8  13 2432.02   93.17
  -4  -8  13 2344.32  124.21
   4   8 -12   48.60   25.84
  -4   8  12  -29.50   49.93
   4   8 -12   66.83   37.64
  -4   8  12   17.00   28.21
   4   8 -11 2513.06  118.92
  -4   8  11 2752.73  178.38
   4   8 -11 2694.30  101.16
  -4   8  11 3152.36  210.42
   4   8 -10   72.86   46.18
  -4   8  10   44.42   31.06
   4   8 -10   98.19   40.11
  -4   8  10   87.33   53.81
   4   8  -9 2064.98   76.34
   4   8  -9 1912.19   66.91
  -4   8   9 2216.05   65.67
  -4   8   9 2011.16  103.30
  -4  -8   9 2032.02   61.04
   4   8  -8 3096.50  112.43
   4   8  -8 2909.80  102.56
  -4   8   8 3027.39  108.04
  -4   8   8 3428.46  197.03
  -4  -8   8 3048.50   89.78
   4   8  -7  106.34   24.43
   4   8  -7   73.53   34.58
  -4   8   7   83.21   65.06
  -4   8   7  122.73   31.84
  -4  -8   7   99.01   26.16
   4   8  -6 7572.15  154.63
   4   8  -6 7869.83  175.89
  -4   8   6 7774.42  175.56
  -4   8   6 7857.54  175.98
  -4  -8   6 7937.33  162.85
   4   8  -5   90.53   20.63
   4   8  -5   69.18   41.32
  -4   8   5  122.11   50.06
  -4   8   5   63.17   36.32
  -4  -8   5   43.53   15.63
  -4   8   4 9650.67  141.72
  -4   8   410772.38  248.57
  -4   8   410004.63  151.56
   4   8  -410202.72  157.17
  -4  -8   410053.98  130.53
  -4  -8   410539.07  155.98
  -4  -8   410614.52  136.81
  -4   8   3 3838.81  101.83
  -4   8   3 4081.80  177.90
   4   8  -3 4312.72  121.57
  -4   8   3 4359.77  138.62
  -4  -8   3 4393.86  115.17
  -4   8   2  697.42   51.54
  -4   8   2  774.35   56.94
   4   8  -2  728.97   68.90
   4  -8  -2  751.63   32.78
  -4  -8   2  670.40   44.90
  -4   8   1  458.85   88.18
   4   8  -1  484.48  142.76
  -4   8   1  450.57  114.52
   4  -8  -1  431.21   34.15
  -4  -8   1  401.55  100.12
   4   8   013924.70  182.04
  -4   8   013514.72  186.08
  -4   8   013635.17  201.34
   4   8   013387.51  176.11
   4   8   014154.01  205.54
   4  -8   012414.09  189.23
  -4  -8   013699.19  198.46
   4   8   1 5201.71  145.77
   4   8   1 5340.01  128.73
  -4   8  -1 5306.86  129.02
  -4   8  -1 5396.53  152.08
   4  -8   1 4706.27  115.45
  -4  -8  -1 4913.82  118.79
   4   8   2 5100.02  157.12
   4   8   2 4742.30  127.49
  -4   8  -2 4704.51  116.58
  -4   8  -2 4748.18  136.14
   4  -8   2 4275.50  105.55
  -4  -8  -2 4639.02  137.67
   4   8   3  785.29  190.16
   4   8   3  753.95   44.84
  -4   8  -3  701.91   69.02
  -4   8  -3  624.76  159.25
   4  -8   3  641.58   47.66
  -4  -8  -3  688.66   90.28
   4   8   4  332.79   71.58
   4   8   4  309.42   64.07
  -4   8  -4  322.61   80.33
  -4   8  -4  207.03   75.09
   4  -8   4  213.39   40.08
  -4  -8  -4  326.67   60.68
   4   8   5  781.77   71.01
  -4   8  -5  694.15   90.84
  -4   8  -5  690.15  147.38
  -4  -8  -5  571.25   70.38
   4  -8   5  706.34   28.51
   4   8   6  106.08   38.74
  -4   8  -6   72.89   28.30
  -4   8  -6   30.27   55.86
  -4  -8  -6  120.49   41.38
   4  -8   6   37.95   18.85
  -4   8  -7   74.93   58.46
  -4   8  -7   88.46   38.50
   4   8   7   76.78   38.52
  -4  -8  -7   45.64   38.69
  -4   8  -8   84.56   37.51
  -4   8  -8   64.58   36.00
   4   8   8   10.21   44.64
  -4  -8  -8  -10.44   43.48
  -4   8  -9  140.47   31.35
  -4   8  -9  203.52   53.36
   4   8   9  112.29   31.83
  -4  -8  -9  183.48   73.86
  -4   8 -10 1420.26   66.00
  -4   8 -10 1509.54  103.20
   4   8  10 1606.86   72.35
  -4  -8 -10 1648.17  236.46
  -4   8 -11  104.18   41.86
  -4   8 -11  216.60   48.90
   4   8  11  193.68   80.96
  -4  -8 -11   77.09   43.01
   4   8  12  -28.46   60.55
  -4   8 -12   12.96   15.02
  -4  -8 -12   32.86   26.42
   4  -8  12   81.53   39.01
   4   8  13  101.83   43.98
  -4   8 -13  147.05   56.72
  -4  -8 -13  109.83   65.81
   4  -8  13   87.36   30.34
   4   8  14   79.87   55.24
  -4   8 -14   52.47   28.21
  -4  -8 -14   49.46   41.60
   4  -8  14    2.51   30.25
   4   8  15  365.42  121.66
  -4   8 -15  482.77  111.65
  -4  -8 -15  426.91  113.14
   4  -8  15  441.17   96.65
   4   8  16   71.98   39.52
  -4   8 -16   88.83   49.59
  -4  -8 -16   -8.57   32.65
   4  -8  16   75.49   50.36
   4   8  17   34.00   35.42
  -4   8 -17   40.37   31.54
  -4  -8 -17    4.84   38.38
   4  -8  17   27.70   27.18
   4   8  18   24.12   33.35
  -4   8 -18   50.25   26.91
  -4  -8 -18   40.31   66.11
   4  -8  18   82.09   41.04
   4   8  19  162.09   63.94
  -4   8 -19   67.26   40.72
  -4  -8 -19  127.37   50.09
   4  -8  19   56.44   50.52
   4   8  20   70.34   54.90
  -4   8 -20  155.52   59.62
  -4  -8 -20  -89.17   61.70
   4  -8  20   80.71   38.81
  -4   8 -21   66.53   28.78
   4  -8  21  121.27   54.56
  -4 -10  22   52.47   34.00
  -4  10  21   87.40   43.23
  -4 -10  21  200.83   96.90
  -4  10  20  -81.51   65.25
  -4  10  20   61.39   54.96
  -4 -10  20   66.59   29.85
   4  10 -19  444.31  112.32
  -4  10  19  783.79  172.23
  -4  10  19  595.43  268.97
  -4 -10  19  807.80  123.86
   4  10 -18  761.89   53.95
  -4  10  18  851.53  188.35
  -4  10  18  686.41  266.74
  -4 -10  18  510.43  168.88
   4  10 -17  240.11   80.56
  -4  10  17  360.74  107.82
  -4  10  17  306.32  134.37
   4  10 -16   51.68   17.45
  -4  10  16  126.40   69.51
  -4  10  16  173.01  102.89
  -4 -10  16  110.01   30.41
   4  10 -15   61.31   31.96
  -4  10  15  141.41   57.67
  -4  10  15  197.62   77.84
  -4 -10  15  102.93   30.93
   4  10 -14   54.56   21.25
  -4  10  14   -7.63   49.39
  -4  10  14  149.29   63.84
  -4 -10  14   40.32   39.77
   4  10 -13  450.68   87.00
  -4  10  13  491.03  100.07
   4  10 -13  393.45   91.76
  -4  10  13  534.83  128.57
   4  10 -12  101.22   20.75
  -4  10  12   56.71   82.94
   4  10 -12  114.52   56.88
  -4  10  12  169.61   46.83
   4  10 -11 1737.69   44.51
  -4  10  11 1786.12  176.58
   4  10 -11 1858.31  113.11
  -4  10  11 1916.15  181.89
   4  10 -10  372.99   78.99
  -4  10  10  566.56  128.24
   4  10 -10  467.93  131.12
  -4  10  10  510.95  178.81
   4  10  -9  655.09   72.39
   4  10  -9  598.77  123.51
  -4  10   9  551.18  146.53
  -4  10   9  579.01  163.59
  -4 -10   9  556.42   26.83
   4  10  -8 1616.68   48.50
   4  10  -8 1789.87  119.08
  -4  10   8 1654.92   65.37
  -4  10   8 1852.87   80.45
  -4 -10   8 1628.97   34.39
   4  10  -7  317.75   35.79
   4  10  -7  234.92   80.24
  -4  10   7  369.09   78.23
  -4  10   7  357.37  127.24
  -4 -10   7  244.38   38.07
   4  10  -6 1812.62   29.73
   4  10  -6 1995.53   66.74
  -4  10   6 1983.07   60.55
  -4  10   6 2090.45   72.02
  -4 -10   6 1962.62   37.17
  -4  10   5  273.99   65.52
  -4  10   5  332.77   76.24
   4  10  -5  312.22   64.48
  -4 -10   5  248.28   28.14
  -4 -10   5  266.02   23.73
  -4  10   4 2618.02  117.00
  -4  10   4 2904.03  109.93
   4  10  -4 2575.45  105.62
  -4  10   4 2959.76  111.70
  -4  10   3  353.96   78.51
  -4  10   3  431.34   91.76
   4  10  -3  430.47  113.74
  -4  10   3  472.74   87.24
  -4  10   2   44.20   22.50
   4  10  -2   -5.16   45.12
  -4  10   2   62.71   37.07
  -4  10   1 5701.81  139.78
   4  10  -1 5993.63  175.45
  -4  10   1 6252.72  161.95
   4 -10  -1 5258.82  118.48
   4  10   0 9269.35  183.94
  -4  10   0 9777.06  201.11
   4  10   0 8917.65  182.07
   4  10   0 9261.32  232.88
  -4  10   010067.28  226.74
   4 -10   0 8674.42  177.65
   4  10   1   34.08   14.93
  -4  10  -1   55.37   23.19
  -4  10  -1   40.12   37.29
   4  10   1   16.66   12.26
   4  10   1   48.31   36.57
   4 -10   1   55.26   21.37
   4  10   2 2589.19  163.47
   4  10   2 2527.18   86.78
  -4  10  -2 2395.67   66.27
  -4  10  -2 2381.95   91.52
   4 -10   2 2279.01   62.27
  -4 -10  -2 2370.30   67.11
   4  10   3  265.09   56.40
   4  10   3  316.27   30.44
  -4  10  -3  336.63   61.63
  -4  10  -3  362.10   62.48
   4 -10   3  242.33   57.01
  -4 -10  -3  300.28   48.03
   4  10   4  967.34   85.26
   4  10   4 1090.22   65.46
  -4  10  -4  998.64   50.89
  -4  10  -4  917.63   68.65
   4 -10   4  922.14   38.40
  -4 -10  -4 1028.94   49.15
   4  10   5 6794.58  222.74
  -4  10  -5 6492.58  179.36
  -4  10  -5 6028.25  216.62
  -4 -10  -5 6157.49  178.68
   4 -10   5 5692.27  158.10
   4  10   6  728.19  188.89
  -4  10  -6  697.07   56.61
  -4  10  -6  605.95  144.68
  -4 -10  -6  569.91  105.81
   4 -10   6  457.77   64.42
  -4  10  -7  715.98  179.51
  -4  10  -7  833.73   86.22
   4  10   7  603.03   54.57
  -4 -10  -7  859.55   81.62
  -4  10  -8  678.53  161.02
  -4  10  -8  799.30   44.95
   4  10   8  895.05  133.99
  -4 -10  -8  847.36   65.76
  -4  10  -9  139.15   56.75
  -4  10  -9   44.01   34.06
   4  10   9  106.66   36.08
  -4 -10  -9   85.66   32.94
  -4  10 -10  547.38  139.16
  -4  10 -10  554.19  131.56
   4  10  10  662.58  168.30
  -4 -10 -10  663.33  109.56
  -4  10 -11  470.54   95.71
  -4  10 -11  565.86   53.55
   4  10  11  607.03  186.78
  -4 -10 -11  484.74   96.46
  -4  10 -12  246.91   56.42
  -4  10 -12  334.48   70.11
   4  10  12  488.11  135.45
  -4 -10 -12  350.85   75.62
   4  10  13  160.69   54.40
  -4  10 -13  249.81   61.23
  -4 -10 -13  105.95   34.72
   4  10  14   30.68   37.73
  -4  10 -14   63.20   21.03
  -4 -10 -14  123.13   54.46
   4 -10  14  158.50   48.77
   4  10  15   29.68   27.90
  -4  10 -15   44.89   42.96
  -4 -10 -15   59.12   29.25
   4 -10  15   40.04   39.18
   4  10  16   87.74   43.30
  -4  10 -16   10.58   20.97
  -4 -10 -16   42.20   37.10
   4 -10  16  166.77   53.98
   4  10  17   71.18   58.81
  -4  10 -17  112.62   35.94
  -4 -10 -17  -70.34   58.71
   4 -10  17   67.21   50.04
   4  10  18   51.63   44.72
  -4  10 -18   38.48   22.17
  -4 -10 -18   61.96   41.16
   4 -10  18  -34.81   61.82
   4  10  19  109.40   69.80
  -4  10 -19   62.01   44.57
  -4 -10 -19   41.75   46.97
   4 -10  19   87.31   47.10
  -4  10 -20  242.78   55.21
   4  10  20  355.98  143.67
  -4 -12  21  107.69   54.80
  -4  12  20  440.14  112.19
  -4  12  20  151.81   74.73
  -4 -12  20  136.27   38.56
  -4  12  19  144.43   60.88
  -4  12  19  176.93   59.92
  -4 -12  19  229.92   94.58
  -4  12  18   84.17   71.59
  -4  12  18   56.55   45.79
  -4 -12  18   50.98   35.58
  -4  12  17  310.87  108.28
  -4  12  17  433.31  105.64
  -4 -12  17  441.62  121.24
   4  12 -16   78.56   47.80
  -4  12  16  127.08   59.81
  -4  12  16   90.02   25.86
  -4 -12  16  154.52   55.72
   4  12 -15   76.43   28.01
  -4  12  15   50.30   33.61
  -4  12  15   46.98   64.64
  -4 -12  15   31.73   35.18
   4  12 -14   66.36   28.10
  -4  12  14   72.55   36.70
   4  12 -14   85.56   63.44
  -4  12  14   43.79   54.65
   4  12 -13  127.88   37.93
  -4  12  13  120.31   65.27
   4  12 -13   74.22   30.49
  -4  12  13   42.27   35.72
   4  12 -12  154.10   58.87
  -4  12  12  234.63   77.03
   4  12 -12  249.39   51.85
  -4  12  12  249.85   79.70
   4  12 -11 3439.88  127.52
  -4  12  11 3523.89  199.98
   4  12 -11 3395.07  224.07
  -4  12  11 3985.74  224.11
   4  12 -10    8.90    9.88
  -4  12  10   65.99   58.03
   4  12 -10   15.66   26.03
  -4  12  10   17.85   46.84
   4  12  -9  262.11   58.02
   4  12  -9  243.37   72.45
  -4  12   9  275.24   61.30
  -4  12   9  227.91   81.21
  -4 -12   9  164.47   39.99
   4  12  -8  393.99   55.62
   4  12  -8  359.81  112.33
  -4  12   8  374.17   88.07
  -4  12   8  570.82   99.66
  -4 -12   8  243.64   47.95
  -4  12   7 1052.44   71.24
  -4  12   7  847.63   91.27
   4  12  -7  784.98  174.70
  -4 -12   7  761.91   25.26
  -4 -12   7  782.13   20.62
  -4  12   6  110.90   52.62
   4  12  -6  104.57   46.13
  -4  12   6  166.10   58.24
  -4  12   5 1321.23   55.08
   4  12  -5 1241.95   53.17
  -4  12   5 1267.42   97.67
  -4  12   4  305.69   61.62
   4  12  -4  211.49   82.91
  -4  12   4  191.63   66.55
  -4  12   3   87.18   21.48
  -4  12   3  156.71   42.75
   4  12  -3  134.04   46.22
  -4  12   3  115.88   56.82
  -4  12   2 1268.00   41.27
  -4  12   2 1529.30   65.17
   4  12  -2 1406.92  140.07
  -4  12   2 1528.74   74.48
  -4  12   1 6701.56  182.84
   4  12  -1 6821.15  205.04
  -4  12   1 7073.33  211.03
   4 -12  -1 6113.62  165.94
   4  12   0  104.10   19.30
  -4  12   0   88.25   31.36
   4  12   0   82.01   18.17
   4  12   0  206.44   85.01
  -4  12   0   95.70   46.80
   4 -12   0   73.47   24.54
   4  12   1   15.35    8.94
  -4  12  -1   27.30   15.24
   4  12   1   28.24   11.65
   4  12   1   34.73   28.81
  -4  12  -1   70.32   28.89
   4 -12   1    4.48   15.51
   4  12   2  182.90   39.78
  -4  12  -2  166.68   43.30
  -4  12  -2  174.18   46.63
   4  12   2  216.98   61.94
   4  12   2  228.88   55.63
   4 -12   2  121.31   30.92
   4  12   3  697.82   59.54
  -4  12  -3  697.13   41.20
  -4  12  -3  695.66  137.72
   4  12   3  696.17   82.71
   4  12   3  748.33  165.95
   4 -12   3  526.66   60.47
  -4  12  -4 1154.81   45.09
   4  12   4 1015.46   59.75
  -4  12  -4 1041.05   76.14
   4 -12   4 1042.79   41.99
   4  12   5 7028.57  132.02
  -4  12  -5 7665.80  114.85
  -4  12  -5 6762.98  124.43
  -4 -12  -5 6906.67  130.11
   4 -12   5 6920.74   99.24
   4  12   6   52.75   41.99
  -4  12  -6   30.73   14.30
  -4  12  -6   22.56   29.60
  -4 -12  -6   45.10   25.57
   4 -12   6   -1.61   13.45
  -4  12  -7   54.75   31.63
  -4  12  -7  127.71   38.13
   4  12   7  270.03   78.54
  -4 -12  -7  189.80   53.22
  -4  12  -8  101.02   46.03
  -4  12  -8   90.09   38.53
   4  12   8   66.11   25.50
  -4 -12  -8  136.84   42.10
  -4  12  -9  -24.58   51.94
  -4  12  -9   33.25   18.81
   4  12   9  155.49   94.08
  -4 -12  -9   73.52   58.50
  -4  12 -10  462.04  117.83
  -4  12 -10  415.29  114.43
   4  12  10  504.00  143.46
  -4 -12 -10  554.76  133.99
  -4  12 -11 1253.77   87.84
  -4  12 -11 1463.84  110.79
   4  12  11 1732.97  123.22
  -4 -12 -11 1385.68   67.13
  -4  12 -12  478.48  107.19
  -4  12 -12  450.86  105.01
   4  12  12  472.64  183.52
  -4 -12 -12  443.08  131.38
  -4  12 -13  498.93  138.18
  -4  12 -13  482.79   98.53
   4  12  13  584.91  195.71
  -4 -12 -13  586.09  110.58
   4  12  14   75.53   32.00
  -4  12 -14  111.14   46.76
  -4 -12 -14   85.03   34.46
   4  12  15  851.88  218.62
  -4  12 -15 1018.10  114.18
  -4 -12 -15  791.34  206.32
   4 -12  15  982.71  104.49
   4  12  16  143.15   63.10
  -4  12 -16   75.56   40.20
  -4 -12 -16  140.81   41.32
   4 -12  16   87.66   45.39
   4  12  17  -23.79   61.36
  -4  12 -17   48.53   21.36
  -4 -12 -17   41.03   50.14
   4 -12  17   61.21   34.59
   4  12  18  203.00   79.41
  -4 -12 -18   97.73   79.60
   4 -12  18   91.01   56.32
   4  12  19   74.03   75.83
  -4 -12 -19   77.44   56.50
   4 -12  19    5.47   27.03
  -4  14  19   74.41   45.70
  -4  14  19  137.86   83.36
  -4 -14  19  221.41   56.76
  -4  14  18  739.48  134.73
  -4  14  18  782.90  127.32
  -4 -14  18  566.29  177.09
  -4  14  17  110.87   48.95
  -4  14  17  150.07   88.74
  -4 -14  17   64.65   29.38
  -4  14  16  148.46   76.02
  -4  14  16   78.57   46.74
  -4 -14  16   19.63   29.91
  -4  14  15   78.38   42.27
   4  14 -15  -21.75   38.81
  -4  14  15  126.40   70.89
  -4  14  14   76.88   50.44
   4  14 -14   60.56   34.42
  -4  14  14   75.66   43.72
  -4  14  13   24.70   30.20
   4  14 -13   15.74   25.85
  -4  14  13  -36.17   59.72
  -4  14  12  427.15   95.79
   4  14 -12  413.35  101.78
  -4  14  12  464.96  157.42
  -4  14  11   39.00   24.87
   4  14 -11   35.81   30.82
  -4  14  11   -7.98   61.27
  -4  14  10   28.15   38.36
   4  14 -10   50.26   26.25
  -4  14  10   89.80   70.35
  -4  14   9  359.66  103.70
   4  14  -9  144.71   58.87
  -4  14   9  342.56   99.03
  -4  14   8  112.03   46.27
  -4  14   8  133.92   59.19
   4  14  -8   90.07   40.27
  -4 -14   8  101.10   23.35
  -4  14   7  793.48   67.41
   4  14  -7  733.31  141.57
  -4  14   7  822.59  199.82
  -4  14   6  778.25   49.11
   4  14  -6  785.22  198.33
  -4  14   6  904.42   87.73
  -4  14   5 1078.90  111.87
   4  14  -5  954.00   72.52
  -4  14   5 1131.38   88.71
  -4  14   4   11.05   17.82
   4  14  -4   32.36   32.74
  -4  14   4   39.92   27.81
  -4  14   3 2411.50   77.76
   4  14  -3 2329.04  193.48
  -4  14   3 2703.52  226.08
  -4  14   2  179.07   41.99
  -4  14   2  256.90   57.24
   4  14  -2  244.99   53.70
  -4  14   2  338.83  100.15
  -4  14   1   26.56   15.21
  -4  14   1   31.50   23.74
  -4  14   1   51.00   35.42
   4  14  -1   29.49   35.34
  -4  14   0 7106.09  130.65
  -4  14   0 7349.33  176.95
   4  14   0 7175.13  184.90
   4  14   1   15.99   10.91
  -4  14  -1   35.76   23.45
   4  14   1   30.28   13.52
   4  14   1   60.70   37.36
  -4  14  -1   16.86   26.22
   4 -14   1   13.29   11.20
   4  14   2   14.50    7.87
  -4  14  -2   31.52   26.40
   4  14   2   49.31   27.52
   4  14   2   50.27   33.85
  -4  14  -2   62.08   39.31
   4 -14   2   31.15   14.17
   4  14   3    7.34    8.47
  -4  14  -3   22.00   13.92
  -4  14  -3    6.30   22.21
   4  14   3   16.68   13.14
   4  14   3   29.98   37.48
   4 -14   3   24.14   11.72
  -4  14  -4 2022.37   42.68
  -4  14  -4 1934.60   94.62
   4  14   4 1928.33   50.21
   4  14   4 1848.84  112.99
   4 -14   4 1701.98   34.76
  -4  14  -5  293.57   48.28
  -4  14  -5  284.00   83.06
   4  14   5  261.71   66.04
   4  14   5  260.69  117.92
   4 -14   5  180.71   36.89
  -4  14  -6 1167.18  110.10
   4  14   6 1089.89   73.61
  -4  14  -6 1125.73  207.90
   4  14   6 1034.65   90.22
  -4  14  -7   32.14   20.70
   4  14   7   39.85   14.19
  -4  14  -7   29.68   31.09
   4  14   7   -9.04   67.88
  -4  14  -8   -3.70   19.19
  -4  14  -8  -65.51   55.49
   4  14   8   -4.92   76.69
  -4  14  -9  103.75   43.96
  -4  14  -9   14.17   17.04
   4  14   9   28.49   27.34
  -4 -14  -9   78.70   50.25
  -4  14 -10 2046.56  117.66
  -4  14 -10 2114.24   55.19
   4  14  10 2010.18  164.64
  -4 -14 -10 2017.91  139.78
  -4  14 -11  347.36   75.39
  -4  14 -11  345.78   60.40
   4  14  11  270.03  127.62
  -4 -14 -11  204.26   97.15
  -4  14 -12  634.06  152.23
  -4  14 -12  482.29  121.72
   4  14  12  443.73  103.72
  -4 -14 -12  457.46  120.89
  -4  14 -13  528.26  122.77
  -4  14 -13  411.76   83.20
   4  14  13  553.85  158.05
  -4 -14 -13  415.42  111.62
   4  14  14   19.88   48.03
  -4  14 -14  -21.20   48.84
  -4 -14 -14   96.09   34.88
   4  14  15 1728.92  145.04
  -4 -14 -15 1722.67  228.69
   4  14  16  307.51   72.35
   4 -14  16  198.36   60.74
   4  14  17   62.97   44.54
   4  14  17   85.67   67.53
   4 -14  17   50.74   42.43
   4  14  18   64.84   28.59
   4 -14  18   63.83   43.82
  -4 -16  19   37.10   25.22
  -4  16  18  118.65  140.20
  -4  16  18  176.98   58.03
  -4  16  17   22.90   27.79
  -4  16  17   98.92   58.27
  -4 -16  17   46.85   24.77
  -4  16  16  125.21  100.74
   4  16 -16  161.56   60.90
  -4  16  16  173.62   88.84
  -4  16  15  437.68   75.08
   4  16 -15  187.15   76.31
  -4  16  15  294.17  116.46
  -4  16  14   62.20   45.55
   4  16 -14   73.22   52.98
  -4  16  14  161.99   51.16
  -4  16  13   25.89   31.03
   4  16 -13   75.95   41.50
  -4  16  13  -14.04   55.12
  -4  16  12  106.89   60.16
   4  16 -12   98.07   51.52
  -4  16  12   32.36   37.15
  -4  16  11   98.85   56.66
   4  16 -11  -32.67   50.24
  -4  16  11  139.74   75.68
  -4  16  10   83.26   47.40
   4  16 -10   -5.92   49.52
  -4  16  10    0.81   53.55
  -4  16   9  803.11   74.31
   4  16  -9  826.19  192.10
  -4  16   9  720.33  152.74
  -4  16   8  178.73   76.35
   4  16  -8  294.66   69.66
  -4  16   8  231.52  137.13
  -4  16   7  707.16   64.40
   4  16  -7  641.55  205.76
  -4  16   7  704.05  209.60
  -4  16   6 3409.75   95.90
   4  16  -6 3642.34  150.31
  -4  16   6 3271.39  183.00
  -4  16   5   34.87   23.15
   4  16  -5   63.87   44.70
  -4  16   5   -5.60   64.72
  -4  16   4   67.49   34.85
   4  16  -4   56.77   36.46
  -4  16   4   67.14   71.24
  -4  16   3   32.60   14.40
   4  16  -3   79.32   63.46
  -4  16   3   67.54   52.63
  -4  16   2 1095.46   41.92
   4  16  -2 1271.51  208.04
  -4  16   2 1145.67  122.15
  -4  16   1    3.66   13.08
  -4  16   1   67.93   56.17
   4  16  -1  -38.45   53.75
  -4  16   0   13.68   16.64
  -4  16   0   60.98   42.49
   4  16   0   86.31   27.29
  -4  16  -1   29.62   20.06
   4  16   1    8.61    5.10
  -4  16  -1  -87.52   65.48
   4  16   1   67.36   36.68
  -4  16  -2  210.14   35.14
   4  16   2  218.45   52.33
  -4  16  -2  428.54  127.66
   4  16   2  184.46   59.79
  -4  16  -3  171.82   30.73
   4  16   3  146.92   32.07
  -4  16  -3  135.35   98.45
   4  16   3  232.81   81.25
  -4  16  -4 1917.29   40.98
   4  16   4 1768.05   53.03
  -4  16  -4 1765.08  185.61
   4  16   4 1856.57  118.94
  -4  16  -5 1244.68   55.30
   4  16   5 1122.38   44.71
  -4  16  -5 1299.66  229.57
   4  16   5 1393.76  322.09
  -4  16  -6  393.68   48.68
   4  16   6  418.87  110.58
  -4  16  -6  345.14   90.66
   4  16   6  486.04  136.68
   4  16   7  267.87   59.47
  -4  16  -7  252.38   83.05
   4  16   7  365.71   97.51
   4  16   8 1219.40   96.56
  -4  16  -8 1027.97  206.16
   4  16   8 1376.19  140.50
   4  16   9  240.06   77.62
  -4  16  -9  433.09   91.14
   4  16   9  192.60   98.34
   4  16  10   86.72   49.16
  -4  16 -10  -26.31   57.10
   4  16  10   63.67   37.45
   4  16  11   77.56   46.93
  -4  16 -11  102.51   41.01
   4  16  11   79.54   42.83
   4  16  12 1219.80   61.88
  -4  16 -12 1192.19  218.05
   4  16  12 1042.67  317.53
   4  16  13  852.88  127.74
  -4  16 -13  945.51  194.27
   4  16  13  848.20  301.86
   4  16  14  218.84  102.63
  -4  16 -14  229.08   71.96
   4  16  14  140.79   97.67
   4  16  15   84.13   54.53
  -4  16 -15   62.90   34.07
   4  16  15   72.16   67.16
   4  16  16  306.20  149.85
   4  16  16  339.21  142.71
   4 -16  16  288.87  104.75
   4  16  17  257.29   69.43
   4 -16  17  103.18   94.46
  -4  18  17   99.60   33.15
  -4  18  16 1310.38  105.95
   4  18 -16  962.58  278.64
  -4  18  16 1007.42  344.58
  -4  18  15  -57.28   42.10
   4  18 -15   -5.24   42.22
  -4  18  15   81.08   78.59
  -4  18  14  270.57  101.70
   4  18 -14  348.25   61.92
  -4  18  14  258.08  104.45
  -4  18  13   25.59   27.25
   4  18 -13   48.75   25.93
  -4  18  13  -23.04   64.42
  -4  18  12   16.28   26.34
   4  18 -12   48.15   34.14
  -4  18  12  106.79   34.87
  -4  18  11   49.65   28.92
   4  18 -11   94.48   38.61
  -4  18  11   72.99   70.44
  -4  18  10   80.32   65.88
   4  18 -10  107.12   38.15
  -4  18  10  117.93   50.27
  -4  18   9  120.73   36.49
   4  18  -9   82.82   55.01
  -4  18   9   78.02   39.86
  -4  18   8  -26.04   31.52
   4  18  -8   76.91   43.25
  -4  18   8   72.45   67.39
  -4  18   7   15.13   21.46
   4  18  -7   59.19   37.58
  -4  18   7   77.21   36.47
  -4  18   6 3079.16   70.19
   4  18  -6 2942.26   90.34
  -4  18   6 2932.82  108.95
  -4  18   5   49.35   22.06
   4  18  -5  233.15   78.50
  -4  18   5   67.78   56.60
  -4  18   4  192.97   41.82
   4  18  -4  124.08   46.74
  -4  18   4  179.98   73.26
  -4  18   3  525.43  100.79
   4  18  -3  535.16  129.28
  -4  18   3  616.67  214.46
  -4  18   2 1216.08   74.62
   4  18  -2 1329.72   97.36
  -4  18   2 1301.01  232.48
  -4  18   1   96.99   29.16
  -4  18   1   85.14   66.49
   4  18  -1  159.35   53.15
  -4  18   0 1199.82  145.46
   4  18   0 1389.83   80.20
  -4  18  -1  701.19  169.31
   4  18   1  840.80  184.68
  -4  18  -2  101.06   52.17
   4  18   2   -2.50   58.96
  -4  18  -3   -4.07   64.71
   4  18   3   65.69   21.97
  -4  18  -4 1110.02  255.89
   4  18   4 1071.02  277.76
   4  18   5  922.80   47.51
  -4  18  -5  921.36   77.50
   4  18   5  857.75  202.64
   4  18   6  351.95   89.72
  -4  18  -6  387.95  107.01
   4  18   6  335.22  144.13
   4  18   7   32.37   26.05
  -4  18  -7  137.21   47.46
   4  18   7   71.21   50.49
   4  18   8   26.17   19.84
  -4  18  -8  115.94   45.24
   4  18   8   37.46   56.20
   4  18   9  926.64   50.06
  -4  18  -9  983.02  147.11
   4  18   9  948.75  110.91
   4  18  10  347.11  167.55
  -4  18 -10  458.10  121.53
   4  18  10  329.68  112.60
   4  18  11   77.95   33.85
  -4  18 -11   48.64   36.28
   4  18  11   38.29   71.46
   4  18  12   48.93   28.96
  -4  18 -12   37.56   37.56
   4  18  12   -0.27   60.77
   4  18  13   60.88   38.07
  -4  18 -13  -13.38   52.66
   4  18  13   99.64   75.80
   4  18  14  472.51  205.28
  -4  18 -14  461.17  142.69
   4  18  14  503.26  215.26
   4  18  15   93.20   48.87
  -4  18 -15  140.75   37.55
   4  18  15   69.20   59.08
   4  18  16   45.50   21.43
  -4  20  15  668.78  218.28
   4  20 -15  941.58  145.08
  -4  20  14   32.49   26.46
   4  20 -14   92.31   40.36
  -4  20  14   61.36   73.65
  -4  20  13  330.95  154.97
   4  20 -13  558.36  170.11
  -4  20  13  405.20  235.94
  -4  20  12   28.64   22.47
   4  20 -12   39.11   21.18
  -4  20  12   35.56   42.59
  -4  20  11  129.10   36.05
   4  20 -11  103.35   31.23
  -4  20  11  184.46   82.79
  -4  20  10  237.93  109.93
   4  20 -10  454.44   81.76
  -4  20  10  272.59  122.82
  -4  20   9   -9.75   26.80
   4  20  -9   47.42   41.77
  -4  20   9   -1.98   34.60
   4  20  -8  -71.12   50.59
  -4  20   8   93.38   63.85
   4  20  -7  164.11   81.50
  -4  20   7   68.39   62.69
   4  20  -6  158.54   68.07
  -4  20   6   84.33   42.78
   4  20  -5   46.13   44.16
  -4  20   5   79.19   51.82
   4  20  -4   57.86   33.99
  -4  20   4   43.79   69.07
   4  20  -3   50.80   38.26
  -4  20   3   93.95   98.82
   4  20  -2   95.67   68.70
  -4  20   2  151.28   44.85
  -4  20   1  158.89   54.85
   4  20  -1  239.85   81.80
  -4  20   0   94.21   62.25
   4  20   0   27.77   52.40
  -4  20  -1   86.18   54.87
   4  20   1  331.77  201.84
  -4  20  -2  -10.79   68.42
   4  20   2   53.68   42.27
  -4  20  -3  136.47   95.00
   4  20   3   24.71   52.52
  -4  20  -4   27.27   57.82
   4  20   4   50.52   64.33
  -4  20  -5 1542.86  100.26
   4  20   5 1720.40  142.39
  -4  20  -6   -3.10   57.08
   4  20   6   10.53   51.03
  -4  20  -7  814.74  230.94
   4  20   7  678.41  100.42
  -4  20  -8   13.53   28.70
   4  20   8   39.51   48.59
  -4  20  -9   80.99   51.82
   4  20   9  -18.92   59.82
  -4  20 -10  327.65   81.50
   4  20  10  184.41   81.22
  -4  20 -11  139.67   66.53
   4  20  11   -9.42   58.98
  -4  20 -12   25.60   36.52
   4  20  12   71.14   36.99
  -4  20 -13  118.28   45.97
   4  22 -13  152.43   43.50
   4  22 -12   41.93   24.78
   4  22 -11   57.64   29.28
  -4  22  11   15.06   39.30
   4  22 -10  268.82   74.73
  -4  22  10  360.72  139.20
   4  22  -9  -23.26   42.80
  -4  22   9   29.02   57.13
   4  22  -8  333.49   77.76
  -4  22   8  186.04   80.49
   4  22  -7   99.64   48.20
  -4  22   7 -129.81   58.63
   4  22  -6  189.04   63.20
  -4  22   6   30.96   42.26
   4  22  -5  -11.31   54.37
  -4  22   5   82.26   36.85
   4  22  -4  512.94  174.87
  -4  22   4  673.14  187.94
   4  22  -3  419.19  116.17
  -4  22   3  376.05  142.86
   4  22  -2  334.21  114.03
  -4  22   2  274.91   81.19
  -4  22   1  904.41  328.50
   4  22  -1  652.82  243.69
  -4  22   0  128.08   64.20
   4  22   0   -5.38   41.42
  -4  22  -1  699.15  200.75
   4  22   1  800.40  178.87
  -4  22  -2   95.72   67.79
   4  22   2   59.17   36.97
  -4  22  -3   29.72   45.69
   4  22   3   36.05   41.49
  -4  22  -4  175.67   57.72
   4  22   4  126.84  118.28
  -4  22  -5  391.12   85.06
   4  22   5  329.08  138.20
  -4  22  -6   48.34   38.53
   4  22   6  190.74   52.02
  -4  22  -7  331.95  111.75
   4  22   7  414.04  206.62
  -4  22  -8   82.65   48.59
   4  22   8   20.79   45.68
  -4  22  -9  325.79   89.50
   4  22   9  108.43   96.86
  -4  22 -10  145.76   71.25
   4  22  10   95.07   56.45
  -4  22 -11   23.57   60.94
   4  24  -9   54.31   27.32
   4  24  -8   41.48   26.96
   4  24  -7   97.13   36.41
  -4  24   7   28.42   35.75
   4  24  -6   30.80   38.10
  -4  24   6   73.06   23.78
   4  24  -5   40.61   40.16
  -4  24   5   39.85   38.30
   4  24  -4   76.66   39.87
  -4  24   4   44.43   28.30
   4  24  -3   -5.06   51.51
  -4  24   3   52.76   40.28
   4  24  -2  120.81   80.69
  -4  24   2  108.11   34.16
  -4  24   1  368.96   96.47
   4  24  -1  330.94  102.82
  -4  24   0   24.65   42.76
   4  24   0   31.06   34.33
  -4  24  -1   66.43   48.63
   4  24   1  -19.68   65.34
  -4  24  -2   -0.89   61.54
   4  24   2   -3.99   66.57
  -4  24  -3  315.01   89.06
   4  24   3  287.67  101.72
  -4  24  -4  119.67   43.99
   4  24   4   -2.66   51.12
  -4  24  -5   94.62   38.33
   4  24   5  -22.16   62.63
  -4  24  -6   45.73   22.76
   4  24   6   60.98   32.78
  -5   1  23   66.72   23.67
  -5  -1  23  187.73   46.57
  -5   1  22   38.10   69.56
  -5   1  22   44.86   15.76
  -5  -1  22   37.51   38.94
  -5  -1  22   52.44   46.41
   5   1 -21  186.25   97.55
  -5   1  21  309.95   92.78
  -5  -1  21  142.19   42.10
  -5   1  20   32.06   30.77
   5  -1 -20   74.18   59.06
  -5  -1  20   28.84   43.06
  -5   1  19   30.34   28.42
   5   1 -19   89.30   51.58
   5  -1 -19   46.28   35.85
  -5  -1  19   84.26   47.94
  -5   1  18  483.86  149.27
   5   1 -18  473.40  158.72
   5  -1 -18  413.30  176.57
  -5  -1  18  594.13   82.28
  -5   1  17   64.19   21.07
   5   1 -17   57.90   35.04
   5  -1 -17   64.90   33.83
  -5  -1  17   12.07   39.45
  -5   1  16  342.14   76.08
   5   1 -16  102.31   94.55
   5  -1 -16  241.23   61.30
  -5  -1  16  261.59   66.28
  -5   1  15   54.69   27.26
   5   1 -15   20.19   29.60
   5  -1 -15   23.98   29.70
  -5  -1  15   84.67   54.57
  -5   1  14   33.17   23.31
   5   1 -14  -12.26   50.49
   5  -1 -14   31.12   17.84
  -5  -1  14   52.12   24.66
  -5   1  13   25.76   25.25
   5   1 -13   93.52   38.93
   5  -1 -13   72.01   34.56
  -5  -1  13   26.52   42.51
  -5   1  12  138.36   42.34
   5   1 -12  237.66   48.83
   5  -1 -12  168.14   77.94
  -5  -1  12  231.86   65.71
  -5   1  11  160.75   36.27
   5   1 -11  195.42   54.78
   5  -1 -11  196.23   54.29
  -5  -1  11  166.94   61.11
  -5   1  10  442.07   76.61
   5   1 -10  332.90   97.25
   5  -1 -10  339.51   86.54
  -5  -1  10  377.53   86.41
   5   1  -9  981.54   46.31
  -5   1   9 1129.06   45.68
   5  -1  -9 1041.96   45.43
  -5  -1   9 1018.81   47.38
  -5  -1   9 1279.88   50.12
   5  -1  -9 1156.09  106.10
   5   1  -8 2539.83   93.68
  -5   1   8 2592.68   86.75
   5  -1  -8 2498.55   96.40
  -5  -1   8 2345.70   90.42
  -5  -1   8 2687.26  142.57
   5  -1  -8 2442.47  108.86
  -5   1   7  868.87   45.57
   5   1  -7  890.28  113.68
  -5   1   7  858.24   48.96
  -5  -1   7  756.22   54.54
  -5  -1   7  693.95   81.01
   5  -1  -7  698.19   43.04
  -5  -1   7  801.67   79.13
   5  -1  -7  764.53   81.58
  -5   1   6 3800.31  133.49
   5   1  -6 3509.20   95.78
  -5   1   6 3376.52   92.11
  -5  -1   6 3177.53   85.72
  -5  -1   6 3231.51  107.08
   5  -1  -6 3208.71   90.66
   5  -1  -6 3471.97   93.64
  -5  -1   6 3470.18   90.23
  -5   1   5 1773.94   68.35
  -5   1   5 1945.89   78.84
  -5   1   5 1848.37  151.25
  -5  -1   5 1528.02   60.55
  -5  -1   5 1525.69   53.61
  -5  -1   5 1686.29   79.15
   5  -1  -5 1879.67   61.96
  -5  -1   5 1599.29   55.31
  -5   1   4 1756.18   63.97
  -5   1   4 2002.96   80.51
  -5   1   4 1906.09   75.61
  -5  -1   4 1556.22   57.46
  -5  -1   4 1581.54   55.61
  -5  -1   4 1664.66   83.18
   5  -1  -4 2018.51   63.22
  -5  -1   4 1702.54   73.59
  -5   1   3  386.41   73.76
   5   1  -3  463.97   34.77
  -5   1   3  377.61   39.32
   5  -1  -3  344.07   72.88
  -5  -1   3  367.15   33.10
  -5  -1   3  507.24   34.25
   5  -1  -3  351.45   40.66
  -5  -1   3  474.51   41.30
   5   1  -2 2995.88  118.28
  -5   1   2 3227.58   90.10
  -5   1   2 3434.71   84.47
   5  -1  -2 3214.47   82.90
  -5  -1   2 3126.13   90.61
   5  -1  -2 3409.75  102.25
   5   1  -1 2414.29   70.69
   5   1  -1 2280.61   72.66
  -5   1   1 2188.89   74.35
  -5   1   1 2349.61   78.50
   5  -1  -1 2396.75   71.81
  -5  -1   1 2309.44   72.42
  -5  -1   1 2379.70   68.58
   5   1   058347.69  333.16
  -5   1   058508.06  337.24
  -5   1   054659.74  322.54
  -5  -1   058863.06  345.14
   5  -1   056539.08  330.21
  -5  -1   056815.52  328.55
   5   1   180831.94  169.28
  -5   1  -181745.23  144.78
   5  -1   179733.16  464.82
  -5  -1  -179901.73  129.63
  -5   1  -2 2442.04  131.05
   5   1   2 2493.93   87.58
  -5   1  -2 2242.18  130.16
   5   1   2 2425.92   82.65
   5  -1   2 2319.71   78.98
   5  -1   2 2273.03   92.83
  -5  -1  -2 2466.46   83.91
  -5  -1  -2 2309.70   74.14
   5   1   3  -22.81   38.62
  -5   1  -3  -44.09   38.22
   5   1   3   -1.88   29.11
   5  -1   3  -48.20   32.23
   5  -1   3   11.46   22.84
  -5  -1  -3    9.89   16.23
  -5  -1  -3   -4.74   34.18
   5  -1   3   -1.95   36.82
   5   1   4   27.26   21.26
  -5   1  -4   57.32   28.39
   5   1   4   -5.76   28.07
   5  -1   4   21.60   29.91
   5  -1   4    4.89   23.28
  -5  -1  -4    9.99   21.89
  -5  -1  -4   21.61   17.44
   5  -1   4   28.54   24.40
   5   1   512889.64  255.15
   5  -1   512572.63  248.58
   5  -1   511612.23  186.02
   5  -1   512576.74   92.08
   5   1   6 1650.74   72.16
  -5   1  -6 1735.55  121.16
  -5  -1  -6 1517.28   57.03
   5  -1   6 1668.76   73.36
   5   1   7 3245.57  144.62
  -5   1  -7 3495.20  159.06
  -5  -1  -7 3255.62  155.48
   5  -1   7 3224.59  147.74
   5   1   8  276.46   96.33
  -5   1  -8  424.33  123.02
  -5  -1  -8  368.50  110.67
   5  -1   8  470.56  123.67
   5   1   9 2072.69   78.49
  -5   1  -9 1722.93   88.41
  -5  -1  -9 2007.72  101.35
   5  -1   9 2070.20  176.37
   5   1  10 5804.65  178.47
  -5   1 -10 6225.51  187.04
  -5  -1 -10 5876.95  177.49
   5  -1  10 5919.04  181.67
   5   1  11 2315.85  126.71
  -5   1 -11 2562.52  138.21
  -5  -1 -11 2411.78   96.10
   5  -1  11 2417.90  108.24
   5   1  12   21.25   26.99
  -5   1 -12   51.99   52.00
  -5  -1 -12   42.87   22.89
   5  -1  12   26.65   46.00
   5   1  13  -35.07   58.52
  -5   1 -13   63.69   54.83
  -5  -1 -13  103.37   42.81
   5  -1  13   76.44   48.02
   5   1  14  532.68  184.34
  -5   1 -14  459.30  123.71
  -5  -1 -14  390.92  113.77
   5  -1  14  574.70  123.39
   5   1  15  859.26  266.38
  -5   1 -15  797.39  199.54
  -5  -1 -15 1230.15  260.35
   5  -1  15  767.04  192.03
   5   1  16  414.04   99.59
  -5   1 -16  587.02  138.85
  -5  -1 -16  399.95   92.28
   5   1  17   69.24   36.75
  -5   1 -17   63.95   52.08
  -5  -1 -17    4.57   55.74
   5  -1  17   -7.18   52.26
   5   1  18   55.72   33.54
  -5   1 -18  179.93   72.35
  -5  -1 -18  -85.51   65.79
   5  -1  18   62.64   36.10
   5   1  19  356.99  105.80
  -5   1 -19  133.61   65.84
  -5  -1 -19  246.94   93.53
   5  -1  19  191.44   70.53
   5   1  20  179.77   57.45
  -5   1 -20   50.44   33.07
  -5  -1 -20   62.54   66.25
   5  -1  20  102.15   56.02
   5   1  21 1030.62  129.62
  -5   1 -21  770.86  176.05
  -5  -1 -21  759.65  293.10
   5  -1  21  522.96  240.58
  -5   3  23   31.65   29.25
  -5  -3  23   20.14   73.18
  -5  -3  23   -0.59   37.15
  -5   3  22   88.92   70.26
  -5   3  22   70.16   33.15
  -5  -3  22  -11.08   61.29
  -5  -3  22   37.48   32.65
   5   3 -21   35.28   36.76
  -5   3  21    9.77   42.28
  -5   3  21   77.19   36.47
  -5  -3  21   47.77   19.65
   5   3 -20   92.81   56.01
  -5   3  20  169.88  108.34
  -5   3  20   19.64   53.11
  -5  -3  20   80.88   45.55
  -5   3  19  464.86  172.23
   5   3 -19  521.29  183.09
   5  -3 -19  659.63  186.75
  -5  -3  19  416.98  133.64
  -5   3  18 1571.45  151.79
   5   3 -18 1552.37  180.66
   5  -3 -18 1648.30  296.46
  -5  -3  18 1667.11  128.76
  -5   3  17  160.72   48.81
   5   3 -17  102.50   45.98
   5  -3 -17  225.87   73.89
  -5   3  16   52.89   21.50
   5   3 -16   -8.47   49.17
   5  -3 -16  -27.36   63.18
  -5  -3  16   96.92   39.31
  -5   3  15  731.96  178.10
   5   3 -15  862.72  144.56
   5  -3 -15  829.59  217.77
  -5  -3  15 1008.52  110.89
  -5   3  14  859.31  200.51
   5   3 -14  653.56  186.17
   5  -3 -14  682.07  172.69
  -5  -3  14  755.32  184.90
  -5   3  13  940.35  130.91
   5   3 -13  832.86  183.80
   5  -3 -13  761.13  202.50
  -5  -3  13  795.85  196.87
  -5   3  12 3297.06  224.98
   5   3 -12 2783.01  140.90
   5  -3 -12 2886.14  191.01
  -5  -3  12 3067.10  129.45
  -5   3  11   51.26   25.59
   5   3 -11   54.65   45.94
   5  -3 -11   57.96   42.69
  -5  -3  11  -43.40   30.58
  -5   3  10  157.71   36.02
   5   3 -10  186.64   60.69
   5  -3 -10  114.46   67.71
  -5  -3  10  149.56   53.34
   5   3  -9 4340.12  110.11
  -5   3   9 4901.69  120.23
  -5  -3   9 4212.03   97.56
  -5  -3   9 4670.14  111.01
   5   3  -8  990.28   46.79
   5  -3  -8 1042.86  124.17
  -5  -3   8 1100.65   43.48
  -5  -3   8 1020.36   45.21
   5  -3  -8 1275.25  103.80
  -5  -3   8 1006.26   59.40
  -5   3   7 1226.77   54.17
   5   3  -7 1168.66  128.74
   5  -3  -7 1178.34   59.00
  -5  -3   7 1075.09   50.34
  -5  -3   7 1139.36   42.21
   5  -3  -7 1135.95   90.01
  -5  -3   7 1152.03   41.96
   5   3  -6  570.97   90.94
  -5   3   6  484.64   98.81
   5   3  -6  497.77   96.09
  -5   3   6  481.38  139.65
  -5   3   6  595.01  153.01
  -5  -3   6  401.21   81.03
  -5  -3   6  510.24   29.37
   5  -3  -6  436.74   92.45
  -5   3   522436.69  168.02
   5   3  -522004.72  150.01
  -5  -3   521405.38  152.02
   5  -3  -523018.55  179.70
  -5   3   4 1719.49   58.80
  -5   3   4 2006.22   71.44
  -5   3   4 1882.69   72.05
   5   3  -4 1730.80   56.32
  -5  -3   4 1576.73   66.77
  -5  -3   4 1659.64   53.78
  -5  -3   4 1513.95   72.19
   5  -3  -4 1922.83   65.90
  -5   3   3 1586.58  103.19
  -5   3   3 1593.79   63.44
   5   3  -3 1409.28   52.05
   5  -3  -3 1355.54   64.62
  -5  -3   3 1384.04   51.04
  -5  -3   3 1293.91   43.01
   5  -3  -3 1548.54   74.41
  -5   3   2 1629.20   59.11
  -5   3   2 1566.78   62.49
   5   3  -2 1368.21   57.52
   5   3  -2 1438.74   88.87
   5  -3  -2 1404.39   93.88
  -5  -3   2 1306.15   59.17
  -5  -3   2 1301.85   69.90
   5  -3  -2 1448.48   97.51
  -5   3   118046.36  122.50
   5   3  -117775.33  108.67
   5   3  -118595.76  121.42
   5  -3  -118115.25  148.76
  -5  -3   118504.76  112.97
  -5  -3   118544.83  118.76
   5   3   076454.14  430.27
  -5   3   075716.40  441.37
  -5   3   075845.02  437.40
   5   3   077712.89  442.13
   5  -3   074817.70  440.00
   5  -3   073926.96  430.48
  -5  -3   077142.28  445.24
  -5   3  -123907.99  158.84
   5   3   123229.11  148.27
  -5   3  -122571.19  152.72
   5  -3   122971.34  149.34
  -5  -3  -124287.38  160.39
   5  -3   123134.25  149.82
  -5  -3  -123583.28  152.84
  -5   3  -2 6037.50  126.74
   5   3   2 5364.30  127.62
  -5   3  -2 5600.47  121.87
   5   3   2 5663.84  133.96
   5  -3   2 5742.56   53.30
   5  -3   2 5671.94  120.74
  -5  -3  -2 5400.21  131.52
  -5  -3  -2 5246.82  161.23
  -5   3  -3 1093.36   70.62
   5   3   3  984.74   47.51
  -5   3  -3 1158.31   51.29
   5   3   3 1052.30  120.53
   5  -3   3 1096.81   90.18
   5  -3   3 1072.52   41.89
  -5  -3  -3 1130.76   38.77
  -5  -3  -3 1094.56   47.89
   5   3   4 2179.70   84.48
   5   3   4 2008.14   67.85
  -5   3  -4 1950.24   74.41
   5  -3   4 1807.05   64.10
   5  -3   4 1643.24   98.15
  -5  -3  -4 2145.12  100.72
  -5  -3  -4 1896.01   71.06
   5   3   5 1202.61   45.66
  -5   3  -5 1323.27  124.29
  -5   3  -5 1212.84  112.73
   5   3   5 1292.07   70.19
   5  -3   5 1235.93   45.66
   5  -3   5 1087.65  117.26
  -5  -3  -5 1183.92   52.36
  -5  -3  -5 1206.54   61.92
  -5   3  -6 8636.96  138.06
   5   3   6 8353.28  137.39
  -5  -3  -6 8251.75  136.79
   5  -3   6 8229.26  146.11
   5   3   7    6.71   44.39
  -5   3  -7   12.37   48.91
  -5  -3  -7   38.08   29.10
   5  -3   7   32.11   18.21
  -5   3  -8   90.89   53.81
  -5  -3  -8   65.38   32.23
   5  -3   8  112.83   56.71
   5   3   9  985.77   68.18
  -5   3  -9  953.22   74.63
  -5  -3  -9  864.40   98.49
   5  -3   9 1048.14   82.53
   5   3  10 2661.87   82.78
  -5   3 -10 2240.24  133.48
  -5  -3 -10 2503.36  168.07
   5  -3  10 2440.20  154.89
   5   3  11 2676.36  106.74
  -5   3 -11 2496.82  226.40
  -5  -3 -11 2714.23  110.02
   5  -3  11 2550.62  103.55
   5   3  12 1032.67   90.38
  -5   3 -12  972.61   90.87
  -5  -3 -12  821.27  189.07
   5  -3  12 1013.79   99.53
   5   3  13 4122.89  283.32
  -5   3 -13 3655.28  195.37
  -5  -3 -13 3522.22  159.57
   5  -3  13 3658.14  107.25
   5   3  14 1100.78  105.55
  -5   3 -14  899.14  209.50
  -5  -3 -14  819.32  233.98
   5  -3  14 1004.60  235.01
   5   3  15   60.87   48.45
  -5   3 -15  226.81   56.79
  -5  -3 -15  276.65   93.09
   5  -3  15  188.81   79.47
   5   3  16 1456.72  230.13
  -5   3 -16 1261.69  109.44
  -5  -3 -16 1363.36  125.97
   5  -3  16 1386.26  265.58
   5   3  17  359.78   82.49
  -5   3 -17  381.88   79.76
  -5  -3 -17  217.91   59.10
   5  -3  17  382.37  155.43
   5   3  18  208.47   67.98
  -5   3 -18  166.11   42.69
  -5  -3 -18   82.17   53.72
   5  -3  18  227.20  102.20
   5   3  19  202.40   43.73
  -5   3 -19  232.18   67.65
  -5  -3 -19  296.80   92.96
   5  -3  19  240.79   89.20
   5   3  20  -29.42   64.79
  -5   3 -20   77.41   32.27
  -5  -3 -20   82.02   30.73
   5  -3  20   34.43   33.01
   5   3  21  151.03   51.10
  -5   3 -21  126.36   47.05
  -5  -3 -21  141.21   54.51
  -5  -5  23   34.18   48.83
  -5  -5  23  134.94   70.42
  -5   5  22   54.17   37.97
  -5   5  22   -2.56   46.70
  -5  -5  22   90.70   34.54
  -5  -5  22   42.35   47.68
   5   5 -21   97.59   38.11
  -5   5  21  -12.32   38.30
  -5   5  21   44.87   31.20
  -5  -5  21   71.02   44.89
   5   5 -20  234.39  101.79
  -5   5  20  144.41   67.19
  -5   5  20  266.67   94.52
  -5  -5  20  130.33   55.26
   5   5 -19   43.89   39.84
  -5   5  19  -64.31   66.13
  -5   5  19   86.43   65.35
  -5  -5  19   24.77   28.64
   5   5 -18   18.92   35.56
  -5   5  18    1.27   30.72
  -5  -5  18   40.14   37.00
  -5   5  17   47.66   27.51
   5   5 -17  -33.90   49.63
   5  -5 -17  116.55   56.64
  -5  -5  17   -5.00   24.93
  -5   5  16  155.22   34.98
   5   5 -16  137.40   36.35
   5  -5 -16   62.95   45.29
  -5  -5  16  191.43   53.34
  -5   5  15 1492.94  148.30
   5   5 -15 1650.75   75.82
   5  -5 -15 1526.58  312.34
  -5  -5  15 1793.00  154.23
  -5   5  14  353.09   81.33
   5   5 -14  303.45   85.10
   5  -5 -14  312.99   76.21
  -5  -5  14  355.51   69.14
  -5   5  13  613.65  165.82
   5   5 -13  673.00  168.59
   5  -5 -13  588.97  102.35
  -5  -5  13  692.20  143.01
  -5   5  12  144.07   65.42
   5   5 -12   61.02   43.77
   5  -5 -12  107.93   23.62
  -5  -5  12  108.34   33.02
  -5   5  11  762.36   45.55
   5   5 -11  798.40   81.64
   5  -5 -11  933.30  186.11
  -5  -5  11  823.88   73.56
  -5   5  10   36.00   16.68
   5   5 -10   11.67   23.51
   5  -5 -10  -32.31   51.75
  -5  -5  10   35.89   14.98
   5   5  -9  505.96  104.75
   5   5  -9  422.94   47.60
  -5   5   9  353.26   91.94
   5  -5  -9  310.79   62.06
   5   5  -8 1461.66   57.04
   5   5  -8 1649.22   64.17
  -5   5   8 1454.76   61.24
  -5   5   8 1916.80  140.10
  -5  -5   8 1685.79   67.73
  -5  -5   8 1692.66   54.42
   5   5  -7 7297.33   72.23
   5   5  -7 7433.01  118.57
  -5   5   7 7689.73  118.24
  -5   5   7 7630.33  188.28
  -5  -5   7 6843.08  172.73
  -5  -5   7 7293.28  181.28
   5   5  -6   32.21   30.90
   5   5  -6   61.80   32.17
  -5   5   6   20.23   25.06
  -5   5   6    2.75   18.49
  -5  -5   6   30.09   12.73
  -5  -5   6   67.53   13.50
   5  -5  -6   38.50   14.35
  -5   5   5  -37.23   27.92
  -5   5   5   52.38   23.36
  -5   5   5    4.37   20.67
   5   5  -5   47.03   33.10
  -5  -5   5   29.13   19.65
  -5  -5   5   -3.27   14.91
  -5  -5   5    9.10   13.12
   5  -5  -5   36.25   22.19
  -5   5   4   17.16   24.59
  -5   5   4   16.74   25.40
  -5   5   4   15.87   25.93
   5   5  -4   32.56   18.43
  -5  -5   4   15.47    7.54
  -5  -5   4  -25.17   23.79
  -5  -5   4    9.73   11.06
   5  -5  -4   11.39   37.14
  -5   5   3  -33.70   34.07
  -5   5   3   -0.47   26.25
   5   5  -3  -12.74   29.12
   5  -5  -3   -2.63   22.31
  -5  -5   3   -2.16    8.06
  -5  -5   3  -15.53   25.32
  -5  -5   3   14.75   11.53
   5  -5  -3    3.36   22.45
  -5   5   2  113.79   46.20
  -5   5   2   31.75   33.70
   5   5  -2   44.75   29.17
   5   5  -2   65.99    8.66
   5  -5  -2   72.51   34.50
  -5  -5   2   80.25    9.40
  -5  -5   2   38.55   32.36
   5  -5  -2   37.59   27.36
  -5   5   131937.88  201.03
   5   5  -132759.50  186.42
  -5   5   133001.33  215.20
  -5  -5   133756.07  191.96
   5  -5  -132544.73  206.79
  -5  -5   132982.52  208.55
  -5   5   015535.81  124.12
  -5   5   015731.57  136.10
   5   5   016328.50  157.33
   5  -5   015290.55  161.18
  -5  -5   016209.16  105.49
  -5  -5   015571.00  123.05
  -5   5  -113378.92  115.78
   5   5   113935.85  167.22
   5  -5   112854.92   71.67
   5  -5   112842.27   75.31
  -5  -5  -113094.64   84.81
  -5   5  -2  218.30   82.33
   5   5   2  301.96   76.17
  -5   5  -2  252.36   70.85
   5   5   2  318.31   66.03
   5  -5   2  289.01   73.16
   5  -5   2  256.72   61.09
  -5  -5  -2  271.12   97.36
  -5  -5  -2  269.63   63.65
  -5   5  -3  273.95   52.24
   5   5   3  349.92   78.52
  -5   5  -3  234.68   70.35
   5   5   3  312.90   76.86
   5  -5   3  187.64   50.09
   5  -5   3  164.89   52.81
  -5  -5  -3  343.23   78.61
  -5  -5  -3  331.64   76.93
   5   5   4 8381.25  135.02
   5   5   4 8031.98   63.10
  -5   5  -4 7461.39   88.51
   5  -5   4 7749.98   61.91
   5  -5   4 7735.06  124.20
  -5  -5  -4 8075.72  131.78
  -5  -5  -4 7757.58   78.53
   5   5   5 2840.73  172.90
   5   5   5 2564.99   87.62
  -5   5  -5 2839.19   98.12
  -5   5  -5 2637.21   99.11
   5  -5   5 2470.69   79.63
  -5  -5  -5 2636.01   90.03
   5   5   6 1361.27   87.02
  -5   5  -6 1443.69   58.92
  -5   5  -6 1421.71  155.39
  -5  -5  -6 1450.65   88.29
   5  -5   6 1486.56   39.13
  -5   5  -7  468.27  106.31
  -5   5  -7  659.79  170.79
   5   5   7  757.50  154.51
  -5  -5  -7  596.77   46.74
  -5   5  -8   71.96   25.53
  -5   5  -8  183.16   58.19
   5   5   8  159.68   52.27
  -5  -5  -8  164.69   65.78
   5   5   9   53.01   49.93
  -5   5  -9   37.40   28.59
  -5  -5  -9   28.35   36.74
   5  -5   9   -3.96   48.29
   5   5  10 4220.87  213.31
  -5   5 -10 3817.19  147.41
  -5  -5 -10 3521.70  112.90
   5  -5  10 3964.92  124.09
   5   5  11 1564.70   77.26
  -5  -5 -11 1499.33   70.41
   5  -5  11 1707.33  113.81
   5   5  12 1192.19   79.63
  -5   5 -12 1125.90   64.90
  -5  -5 -12  927.28   61.58
   5  -5  12 1131.88  232.28
   5   5  13 1494.24  233.33
  -5   5 -13 1296.78   96.39
  -5  -5 -13 1352.80   97.56
   5  -5  13 1134.46   90.36
   5   5  14   37.99   54.45
  -5   5 -14   47.97   24.75
  -5  -5 -14  -93.95   74.32
   5  -5  14  -20.81   56.78
   5   5  15   61.50   41.55
  -5   5 -15   51.48   37.84
  -5  -5 -15   34.46   48.81
   5  -5  15   91.49   63.35
   5   5  16  292.23   97.83
  -5   5 -16  427.93  115.93
  -5  -5 -16  425.48   85.59
   5  -5  16  426.75  102.34
   5   5  17   80.52   53.02
  -5   5 -17   23.82   32.29
  -5  -5 -17   50.30   37.69
   5  -5  17  107.85   46.21
   5   5  18  -71.70   57.06
  -5   5 -18   42.84   32.65
  -5  -5 -18   90.08   37.87
   5  -5  18   51.01   34.87
   5   5  19  166.99   74.64
  -5   5 -19  126.45   58.68
  -5  -5 -19   56.75   31.21
   5  -5  19  115.29   47.26
   5   5  20  216.62   99.12
  -5   5 -20  307.25   66.77
  -5  -5 -20  233.25   50.77
   5  -5  20  297.11   79.58
  -5   5 -21  129.19   63.41
   5   5  21   67.93   41.12
   5  -5  21   64.93   50.62
  -5   7  23  119.70   40.61
  -5  -7  23  142.65   71.26
  -5   7  22   44.52   35.13
  -5  -7  22   13.07   21.32
  -5  -7  22   76.37   34.52
  -5   7  21  204.18   59.61
  -5   7  21  261.95  109.77
  -5  -7  21  193.19   90.06
   5   7 -20  313.69   97.01
  -5   7  20  370.94  141.55
  -5   7  20  229.77   97.94
  -5  -7  20  228.03   56.19
   5   7 -19   66.04   41.96
  -5   7  19  -28.22   56.80
  -5   7  19   22.18   56.18
  -5  -7  19  -60.85   42.77
   5   7 -18   37.40   31.26
  -5   7  18  102.36   45.96
  -5   7  18  114.64   52.20
  -5  -7  18  117.06   68.16
   5   7 -17   42.21   37.91
  -5   7  17   37.32   32.81
  -5   7  17    3.34   45.55
  -5  -7  17   85.74   41.92
   5   7 -16  396.15  109.82
  -5   7  16  360.26   95.46
  -5   7  16  367.04   96.37
  -5  -7  16  380.71   88.29
   5   7 -15  313.85   71.59
  -5   7  15  121.90  103.62
  -5   7  15  144.18   38.91
  -5  -7  15  311.79   68.79
   5   7 -14  666.55   54.38
  -5   7  14  547.84  156.51
  -5   7  14  644.70  165.60
  -5  -7  14  581.35  162.98
   5   7 -13  379.20  117.09
  -5   7  13  444.19   98.92
  -5   7  13  457.92   96.34
  -5  -7  13  439.62  112.72
   5   7 -12    8.92   21.85
  -5   7  12  -82.34   49.52
  -5   7  12   -9.99   30.07
  -5  -7  12   22.12   40.46
   5   7 -11  155.26   56.13
  -5   7  11   63.13   51.43
   5   7 -11   90.04   27.64
  -5   7  11   87.79   35.39
   5   7 -10  669.20   47.01
  -5   7  10  769.90   52.54
   5   7 -10  715.73   59.50
  -5   7  10  894.73  162.58
   5   7  -9  387.88   61.47
   5   7  -9  377.73   76.71
  -5   7   9  388.12   88.70
  -5   7   9  393.58  102.24
  -5  -7   9  373.19   33.73
   5   7  -8   31.51   17.25
   5   7  -8  -62.09   38.80
  -5   7   8   67.17   30.34
  -5   7   8   12.99   33.99
  -5  -7   8   17.78   13.27
   5   7  -7  355.96   66.83
   5   7  -7  418.10  121.25
  -5   7   7  395.05  160.80
  -5   7   7  332.87   84.18
  -5  -7   7  330.98   29.47
   5   7  -6    9.70    6.88
   5   7  -6   34.08   22.11
  -5   7   6    8.24   30.19
  -5   7   6   13.94   24.79
  -5  -7   6   23.69   14.07
  -5  -7   6   10.14   10.73
  -5   7   5  305.39   89.80
  -5   7   5  489.12   87.84
  -5   7   5  396.34   43.38
   5   7  -5  435.75   98.55
  -5  -7   5  437.64   37.90
  -5  -7   5  401.92   58.68
  -5  -7   5  434.50   42.28
  -5   7   4  183.96   49.85
  -5   7   4  190.76   88.41
   5   7  -4  252.05   54.38
  -5   7   4  211.42   81.77
  -5  -7   4  203.78   31.14
  -5  -7   4  211.29   46.06
  -5  -7   4  220.51   29.86
   5  -7  -4  180.86   37.58
  -5   7   3 4904.02  134.23
   5   7  -3 5269.80  174.28
  -5   7   3 4988.65  132.89
   5  -7  -3 4450.56  111.54
  -5  -7   3 4854.98  158.69
   5  -7  -3 4784.66  124.62
  -5   7   2  593.06   70.92
  -5   7   2  680.70   59.39
   5   7  -2  789.35  156.68
   5  -7  -2  585.41   70.39
  -5  -7   2  615.18   68.15
   5  -7  -2  564.30   40.52
   5   7  -115330.50  221.56
   5   7  -115025.40  191.79
  -5   7   115114.37  206.84
  -5   7   115414.75  219.97
   5  -7  -114004.63  191.12
  -5  -7   113942.77  178.94
   5  -7  -114631.92  217.89
  -5  -7   114818.33  205.74
  -5   7   0   43.98   33.38
   5   7   0   25.52   10.60
  -5   7   0   26.68   33.22
   5   7   0   50.21   33.72
   5  -7   0   48.02   28.52
   5  -7   0   44.34   18.87
  -5  -7   0   47.62   11.53
  -5  -7   0   35.57   20.21
  -5   7  -1 1440.57   62.50
   5   7   1 1599.69   41.25
  -5   7  -1 1408.19   74.74
   5   7   1 1614.89  125.00
   5  -7   1 1285.67  111.11
   5  -7   1 1380.32   53.93
  -5  -7  -1 1555.06   52.84
  -5  -7  -1 1421.35  104.42
   5   7   2 4752.19  186.74
   5   7   2 4587.25  113.37
  -5   7  -2 4765.10  128.68
  -5   7  -2 4597.84  124.89
   5  -7   2 4172.19  116.95
  -5  -7  -2 4509.79  114.81
  -5  -7  -2 4480.68  119.06
   5   7   3 2708.48  102.91
   5   7   3 2524.09   93.78
  -5   7  -3 2406.33   87.67
  -5   7  -3 2316.48   91.66
   5  -7   3 2260.50   71.35
  -5  -7  -3 2347.28   78.22
  -5   7  -412080.11  223.02
   5   7   411851.41  168.28
   5   7   412602.85  215.32
  -5  -7  -411542.26  164.99
   5   7   5  641.03  158.17
  -5   7  -5  539.01   63.80
  -5   7  -5  473.97  101.22
  -5  -7  -5  525.35  133.96
   5  -7   5  549.11   50.35
   5   7   6  202.51   84.60
  -5   7  -6  307.00   84.25
  -5   7  -6  230.06   85.38
  -5  -7  -6  318.16   83.00
   5  -7   6  313.21   82.35
  -5   7  -7   16.51   29.11
  -5   7  -7   30.05   14.97
   5   7   7   68.59   54.55
  -5  -7  -7   -3.04   35.71
  -5   7  -8   21.32   24.00
  -5   7  -8   78.25   28.78
   5   7   8   62.44   28.50
  -5  -7  -8  -38.82   42.71
  -5   7  -9  446.70   87.92
  -5   7  -9  413.84  125.37
   5   7   9  295.53   96.56
  -5  -7  -9  454.71  138.47
  -5   7 -10  261.94   74.82
  -5   7 -10  259.03   84.68
   5   7  10  318.54   74.12
  -5  -7 -10  328.28  118.91
   5   7  11 2004.78  150.69
  -5   7 -11 1712.94   62.59
  -5  -7 -11 1879.20  162.65
   5  -7  11 1856.85  216.49
   5   7  12  603.03  127.67
  -5   7 -12  546.79  199.15
  -5  -7 -12  657.49  146.83
   5  -7  12  581.68  150.43
   5   7  13  140.98   65.69
  -5   7 -13  168.18   67.27
  -5  -7 -13  169.82   58.52
   5  -7  13  113.26   61.35
   5   7  14  638.03  137.10
  -5   7 -14  421.81  118.68
  -5  -7 -14  424.28   88.44
   5  -7  14  431.49   75.69
   5   7  15  -12.77   60.14
  -5   7 -15   87.85   52.13
  -5  -7 -15  -27.60   60.89
   5  -7  15   58.59   50.22
   5   7  16   44.38   41.65
  -5   7 -16    4.86   17.86
  -5  -7 -16   29.01   42.25
   5  -7  16   62.27   32.04
   5   7  17 1206.55   88.68
  -5   7 -17 1077.39   70.97
  -5  -7 -17 1083.70   75.09
   5  -7  17 1052.85  125.51
   5   7  18  138.82   64.61
  -5   7 -18  157.30   44.48
  -5  -7 -18  163.86   85.52
   5  -7  18  107.60   76.07
   5   7  19  134.27  112.46
  -5   7 -19  327.32   82.47
  -5  -7 -19  101.15   48.27
   5  -7  19  152.00   89.08
   5   7  20  599.90  294.99
  -5   7 -20  748.41  174.83
  -5  -7 -20  639.00  242.17
   5  -7  20  463.89  173.99
  -5   7 -21   20.39   24.11
   5  -7  21   20.73   44.36
  -5   9  22  101.58   43.14
  -5  -9  22  137.94   56.06
  -5   9  21  -15.12   59.93
  -5   9  21  -26.97   63.12
  -5  -9  21  -36.03   39.29
  -5  -9  21   55.77   33.42
  -5   9  20  -77.04   64.62
  -5   9  20   89.64   69.30
  -5  -9  20   44.22   18.92
   5   9 -19   29.40   19.13
  -5   9  19   28.82   35.90
  -5   9  19   56.93   44.11
  -5  -9  19  114.59   39.67
   5   9 -18  104.64   50.60
  -5   9  18  131.98   89.55
  -5   9  18   80.18   49.91
  -5  -9  18  108.80   52.20
   5   9 -17   27.28   30.95
  -5   9  17   70.70   34.94
  -5   9  17   63.92   87.43
  -5  -9  17   54.11   46.37
   5   9 -16  109.21   39.17
  -5   9  16  153.67   51.22
  -5   9  16  100.05   60.54
  -5  -9  16  151.98   48.79
   5   9 -15   44.13   25.42
  -5   9  15   77.49   35.01
  -5   9  15   44.27   57.74
  -5  -9  15   74.95   27.68
   5   9 -14   46.61   31.20
  -5   9  14   46.79   39.80
  -5   9  14   49.47   22.82
  -5  -9  14   30.10   27.93
   5   9 -13  344.54   96.52
  -5   9  13  296.66   97.09
  -5   9  13  356.00   67.65
   5   9 -12  123.91   31.72
  -5   9  12   81.89   48.89
   5   9 -12   83.12   36.09
  -5   9  12   94.01   29.97
   5   9 -11  286.95   62.75
  -5   9  11  312.71   57.24
   5   9 -11  225.36   64.91
  -5   9  11  189.33   83.68
   5   9 -10  241.31   55.93
  -5   9  10  217.95   59.76
   5   9 -10  246.45   39.34
  -5   9  10  254.55   88.27
   5   9  -9   67.72   45.05
   5   9  -9   64.49   31.22
  -5   9   9   65.75   62.98
  -5   9   9   94.36   50.34
  -5  -9   9   72.72   31.03
   5   9  -8 1085.84   35.57
   5   9  -8 1223.38   80.62
  -5   9   8 1148.80  172.38
  -5   9   8 1181.75   91.11
  -5  -9   8 1038.27   39.12
   5   9  -7 1130.11   51.46
   5   9  -7 1228.62   56.85
  -5   9   7 1308.80   60.67
  -5  -9   7 1263.11   26.32
  -5   9   6  164.83   83.60
  -5   9   6  255.58   60.41
   5   9  -6  252.37   80.80
  -5  -9   6  237.53   45.47
  -5  -9   6  259.34   45.94
  -5   9   5 4601.06  116.11
   5   9  -5 4735.11  121.02
  -5   9   5 4810.46  167.64
  -5  -9   5 4282.38   90.62
  -5  -9   5 4735.20   95.95
  -5   9   4  996.16   72.90
  -5   9   4  952.21   59.69
   5   9  -4 1265.72  192.83
  -5   9   4 1097.45   60.52
  -5   9   3 2360.86   75.76
  -5   9   3 2606.00  101.65
   5   9  -3 2627.98  124.92
   5  -9  -3 2436.62   70.86
  -5   9   2  261.66   69.28
  -5   9   2  183.17   60.40
   5   9  -2  130.22   35.47
   5  -9  -2  154.42   35.15
  -5   9   1  136.46   45.14
   5   9  -1  169.57   69.60
  -5   9   1  143.49   41.56
   5  -9  -1  103.62   25.02
   5   9   0    6.41    5.93
  -5   9   0  -24.80   24.03
   5   9   0   31.75   37.27
  -5   9   0   30.95   34.05
   5  -9   0   -5.64   15.46
   5   9   1  117.52   67.05
   5   9   1   31.50   16.27
  -5   9  -1   31.97   17.14
  -5   9  -1   46.72   30.40
   5  -9   1   17.54   12.73
  -5  -9  -1   44.14   14.63
   5   9   2 6081.39  127.41
  -5   9  -2 6105.59  132.52
   5   9   2 6049.27  142.86
   5  -9   2 5383.65  115.17
   5   9   3 4628.89  120.37
   5   9   3 4400.15   55.91
  -5   9  -3 4523.49  113.80
  -5   9  -3 4199.13  126.10
   5  -9   3 4208.16   53.41
  -5  -9  -3 4345.05  116.72
   5   9   4  871.09  183.67
   5   9   4  726.40   85.76
  -5   9  -4  730.70   35.36
  -5   9  -4  707.54   51.56
   5  -9   4  657.85   27.54
  -5  -9  -4  690.69   52.08
   5   9   5  458.87  128.60
  -5   9  -5  404.21   37.46
  -5   9  -5  448.32  139.77
  -5  -9  -5  576.73  125.78
   5  -9   5  326.34   82.39
  -5   9  -6 2219.31   95.15
  -5   9  -6 2247.65   85.71
   5   9   6 2350.93  104.68
  -5  -9  -6 2135.54   79.00
  -5   9  -7 1179.22   56.45
  -5   9  -7 1214.43  106.85
   5   9   7 1223.34   66.04
  -5  -9  -7 1212.87   59.24
  -5   9  -8  -12.07   41.16
  -5   9  -8   72.47   32.12
   5   9   8   47.32   46.60
  -5  -9  -8   52.22   27.03
  -5   9  -9 1147.93   69.83
  -5   9  -9 1250.88   47.77
   5   9   9 1325.06   66.61
  -5  -9  -9 1348.85  247.43
  -5   9 -10   79.13   39.33
  -5   9 -10   47.03   23.58
   5   9  10   46.78   43.21
  -5  -9 -10  -54.80   57.71
  -5   9 -11  593.10  112.22
  -5   9 -11  514.73  149.25
   5   9  11  740.37  134.65
  -5  -9 -11  586.68  125.01
   5   9  12   34.64   51.19
  -5   9 -12   36.48   20.51
  -5  -9 -12  109.47   39.87
   5   9  13  121.46   70.71
  -5   9 -13  133.63   45.58
  -5  -9 -13  131.92   35.44
   5  -9  13  209.39   55.68
   5   9  14  110.46   58.34
  -5   9 -14  181.92   51.44
  -5  -9 -14  158.80   81.44
   5  -9  14  115.46   51.73
   5   9  15  174.56   68.78
  -5   9 -15  203.76   52.45
  -5  -9 -15   86.78   29.32
   5   9  16  624.93  169.44
  -5   9 -16  585.79  154.04
  -5  -9 -16  520.35  119.38
   5  -9  16  450.80  122.48
   5   9  17 1582.08   88.82
  -5   9 -17 1324.95   81.97
  -5  -9 -17 1404.91  125.65
   5  -9  17 1466.10  101.49
   5   9  18   37.94   83.65
  -5   9 -18   35.85   30.83
  -5  -9 -18  -83.44   70.93
   5  -9  18   -9.99   57.13
   5   9  19   46.91   69.63
  -5   9 -19  -30.67   37.67
  -5  -9 -19    3.07   38.91
   5  -9  19   86.15   55.57
  -5   9 -20   49.24   25.43
   5   9  20   40.06   69.88
   5  -9  20   31.45   23.89
  -5   9 -21   41.04   24.79
  -5  11  21   21.36   61.53
  -5 -11  21   11.28   32.08
  -5  11  20   31.69   73.41
  -5  11  20   33.69   54.32
  -5 -11  20   20.07   24.16
  -5  11  19   44.15   60.80
  -5  11  19 -154.54   67.68
  -5 -11  19   62.97   16.73
  -5  11  18 1210.19   87.79
  -5  11  18 1121.35  120.75
  -5 -11  18  799.96  221.12
   5  11 -17   16.44   22.39
  -5  11  17   34.28   35.18
  -5  11  17   33.57   67.44
  -5 -11  17   79.89   28.65
   5  11 -16   67.36   30.74
  -5  11  16   82.90   46.34
  -5  11  16    9.68   30.89
  -5 -11  16  158.04   70.68
   5  11 -15   33.15   21.57
  -5  11  15   88.37   51.80
  -5  11  15   81.91   29.15
  -5 -11  15   17.13   28.21
   5  11 -14   47.90   27.34
  -5  11  14   21.34   31.39
   5  11 -14   55.92   35.25
  -5  11  14  -12.20   52.94
   5  11 -13  305.46   59.61
  -5  11  13  223.99   72.54
   5  11 -13  293.54   67.92
  -5  11  13  300.59   84.18
   5  11 -12  214.54   41.88
  -5  11  12  291.67   60.43
  -5  11  12  268.95   78.20
   5  11 -11   31.59   19.12
  -5  11  11  -28.29   53.06
   5  11 -11   10.45   16.31
  -5  11  11   76.50   33.37
   5  11 -10  373.17   50.03
  -5  11  10  602.53  155.69
   5  11 -10  433.17  119.58
  -5  11  10  480.61  129.51
   5  11  -9 1488.80   33.50
   5  11  -9 1481.43  104.66
  -5  11   9 1656.25  153.59
  -5  11   9 1991.62  124.08
  -5 -11   9 1578.39   31.91
  -5  11   8 2925.31  202.83
  -5  11   8 2357.12   90.78
   5  11  -8 2274.73   89.53
  -5 -11   8 2505.18   72.69
  -5 -11   8 2219.20   72.52
  -5  11   7  681.95  110.72
  -5  11   7  660.56  131.81
   5  11  -7  649.48   58.66
  -5 -11   7  543.58   32.20
  -5 -11   7  508.38   46.63
  -5  11   6  373.15   77.82
   5  11  -6  497.33  115.49
  -5  11   6  497.07  148.69
  -5 -11   6  379.81   19.82
  -5 -11   6  386.37   23.07
  -5  11   5  988.86   61.27
   5  11  -5 1090.69   65.76
  -5  11   5 1145.68   59.48
  -5  11   4   -2.98   21.73
   5  11  -4   49.91   29.30
  -5  11   4   15.00   23.43
  -5  11   3  611.02   41.49
  -5  11   3  758.29   80.28
   5  11  -3  804.86   65.19
  -5  11   3  799.13   77.31
  -5  11   2 1038.72   40.26
  -5  11   2 1258.97  195.49
   5  11  -2 1382.06  254.24
   5 -11  -2  999.46   33.76
  -5  11   1   -3.93   24.79
   5  11  -1   69.27   25.07
  -5  11   1   31.69   42.19
   5 -11  -1   19.15   11.36
   5  11   0  502.45   27.10
  -5  11   0  486.52   57.96
   5  11   0  538.26   39.31
   5  11   0  526.18  108.04
  -5  11   0  519.05  101.85
   5 -11   0  425.10   60.18
   5  11   1  408.31   38.36
  -5  11  -1  566.60   96.07
  -5  11  -1  601.42  180.03
   5  11   1  373.24   65.41
   5  11   1  480.73   89.57
   5 -11   1  435.58   49.72
   5  11   2 8828.66  252.67
   5  11   2 8302.68  222.28
  -5  11  -2 9032.91  240.67
  -5  11  -2 8588.94  253.45
   5 -11   2 7737.69  207.01
  -5 -11  -2 7859.45  221.59
   5  11   3  155.31   68.51
   5  11   3  116.93   21.79
  -5  11  -3  181.21   32.28
  -5  11  -3   70.18   54.24
   5 -11   3   79.57   21.45
  -5 -11  -3   42.61   18.55
   5  11   4  159.92   58.47
   5  11   4  122.85   26.26
  -5  11  -4  121.83   31.19
  -5  11  -4  138.22   41.36
   5 -11   4   80.27   30.55
  -5 -11  -4  143.57   40.01
   5  11   5  711.45   71.65
  -5  11  -5  694.83   39.14
  -5  11  -5  558.29  126.25
  -5 -11  -5  610.35   40.47
   5 -11   5  530.81   47.67
  -5  11  -6 2613.78  132.20
  -5  11  -6 2683.19   52.09
   5  11   6 2655.69   80.45
  -5 -11  -6 2580.26   98.92
  -5  11  -7  516.45   90.97
  -5  11  -7  578.79   71.17
   5  11   7  484.80  116.10
  -5 -11  -7  402.93   89.14
  -5  11  -8  -73.59   48.70
  -5  11  -8   15.08   20.23
   5  11   8   17.37   35.07
  -5 -11  -8   -9.76   45.78
  -5  11  -9   51.03   31.78
  -5  11  -9  -10.62   24.43
   5  11   9   90.99   48.22
  -5 -11  -9   98.13   48.94
  -5  11 -10  191.29   46.40
  -5  11 -10  152.93   41.03
   5  11  10  189.77   69.02
  -5 -11 -10  148.03   49.66
  -5  11 -11  227.44   56.69
  -5  11 -11  278.01   56.86
   5  11  11  393.64  113.06
  -5 -11 -11  387.88   56.61
  -5  11 -12  979.97   57.52
  -5  11 -12  940.08   80.26
   5  11  12  823.29  258.76
  -5 -11 -12  833.76  179.03
  -5  11 -13   36.14   45.35
  -5  11 -13   59.44   26.98
   5  11  13   21.97   35.27
  -5 -11 -13   88.26   43.56
   5  11  14  -14.64   54.87
  -5  11 -14   97.10   29.52
  -5 -11 -14  -39.26   59.20
   5 -11  14   96.31   65.74
   5  11  15  111.45   67.06
  -5  11 -15  128.93   44.62
  -5 -11 -15   29.25   39.05
   5 -11  15  149.31   65.40
   5  11  16  216.63   81.86
  -5  11 -16  274.26   85.69
  -5 -11 -16  231.61   90.64
   5 -11  16  290.86   86.31
   5  11  17   82.81   56.33
  -5  11 -17   66.72   40.95
  -5 -11 -17    2.48   45.13
   5 -11  17   30.99   29.04
   5  11  18   49.26   52.71
  -5  11 -18   17.07   15.96
  -5 -11 -18   23.74   35.40
   5 -11  18   78.11   58.65
   5  11  19   89.40   46.79
  -5  11 -19   78.56   37.96
  -5 -11 -19   37.42   52.08
   5 -11  19   56.40   54.30
  -5  13  20   89.68   63.70
  -5 -13  20  115.26   60.15
  -5  13  19  182.81   56.33
  -5  13  19  163.21   76.85
  -5  13  18  444.00  104.72
  -5  13  18  229.99   67.35
  -5 -13  18  212.36   71.60
  -5  13  17   45.62   32.27
  -5  13  17   31.35   30.55
  -5 -13  17   17.54   48.35
  -5  13  16    6.97   44.98
  -5  13  16   62.47   41.32
  -5 -13  16   -7.68   36.24
  -5  13  15   67.41   48.24
   5  13 -15   32.22   32.81
  -5  13  15   43.14   46.39
  -5  13  14  149.50   56.18
   5  13 -14   97.59   35.43
  -5  13  14  161.14   59.24
  -5  13  13   58.92   39.94
   5  13 -13   69.26   54.86
  -5  13  13   41.95   59.91
  -5  13  12  181.47   93.65
  -5 -13  12  114.58   34.54
  -5  13  11   47.76   31.33
  -5  13  11   83.91   52.09
   5  13 -11   96.64   30.05
  -5 -13  11   32.86   13.81
  -5  13  10  156.07   60.35
  -5  13  10  293.00   84.56
   5  13 -10  258.59   68.10
  -5 -13  10  198.30   40.72
  -5  13   9   57.78   33.54
  -5  13   9  129.71   73.65
   5  13  -9   10.42   41.49
  -5 -13   9    1.93    6.86
  -5  13   8 1635.34  111.64
  -5  13   8 1522.95  105.37
   5  13  -8 1799.46  219.29
  -5 -13   8 1490.26   43.39
  -5 -13   8 1570.76   33.99
  -5  13   7  506.52  109.92
   5  13  -7  541.34  118.81
  -5  13   7  564.98  146.65
  -5  13   6   40.42   37.29
   5  13  -6   66.15   47.95
  -5  13   6  126.98   44.54
  -5  13   5  613.83  127.24
   5  13  -5  583.73  144.18
  -5  13   5  605.25  160.76
  -5  13   4  490.29  119.99
   5  13  -4  454.49   92.84
  -5  13   4  690.80  141.86
  -5  13   3  842.80   38.38
   5  13  -3  921.78   57.04
  -5  13   3  921.38   69.42
  -5  13   2  250.46   50.82
  -5  13   2  231.12   58.92
   5  13  -2  292.15   65.28
  -5  13   2  280.13   79.04
  -5  13   1  151.39   39.95
   5  13  -1  108.79   34.86
  -5  13   1  242.98   41.90
   5 -13  -1   98.74   29.48
   5  13   0   56.39   12.31
  -5  13   0   48.70   25.37
   5  13   0  136.01   33.05
  -5  13   0  107.12   38.60
   5 -13   0   41.49   18.35
   5  13   1 2838.11   38.61
  -5  13  -1 2923.59   56.12
   5  13   1 2609.77   43.03
   5  13   1 2775.58   81.32
  -5  13  -1 2831.53   86.86
   5 -13   1 2659.89   43.78
   5  13   2   15.73   10.74
  -5  13  -2   24.39   17.42
  -5  13  -2    6.49   37.23
   5  13   2   32.71   15.83
   5  13   2   18.80   36.41
   5 -13   2   16.31   11.10
   5  13   3  250.74   52.98
  -5  13  -3  268.98   59.37
  -5  13  -3  339.44   88.91
   5  13   3  248.72   51.20
   5  13   3  335.61  103.51
   5 -13   3  152.83   48.31
  -5  13  -4   27.43   19.78
  -5  13  -4   48.46   44.31
   5  13   4   15.91    7.66
   5  13   4   64.99   34.91
   5 -13   4   13.10   12.48
   5  13   5  139.02   42.06
  -5  13  -5   73.39   24.21
  -5  13  -5   28.33   43.74
  -5 -13  -5   84.56   28.32
   5 -13   5   53.63   15.33
  -5  13  -6 1698.49  294.75
  -5  13  -6 1679.04   75.46
   5  13   6 1597.99  115.00
  -5 -13  -6 1561.87   90.11
  -5  13  -7  222.24   65.67
  -5  13  -7  245.07   35.99
   5  13   7  246.65  120.61
  -5 -13  -7  146.51   59.79
  -5  13  -8   37.85   45.36
  -5  13  -8   45.64   22.72
   5  13   8  -20.46   72.71
  -5 -13  -8  108.92   48.21
  -5  13  -9   11.08   32.09
  -5  13  -9   40.91   22.32
   5  13   9   57.88   95.93
  -5 -13  -9   66.97   58.07
  -5  13 -10  525.43  142.62
  -5  13 -10  520.46  134.97
   5  13  10  873.18  200.83
  -5 -13 -10  652.55  152.57
  -5  13 -11  676.22  196.79
  -5  13 -11  892.42   47.45
   5  13  11  924.49  214.00
  -5 -13 -11  766.49  151.75
  -5  13 -12   80.16   47.95
  -5  13 -12  197.49   51.14
   5  13  12   81.82   41.45
  -5 -13 -12  167.33   61.38
  -5  13 -13  468.71  111.53
  -5  13 -13  437.92   78.69
   5  13  13  397.82  148.53
  -5 -13 -13  183.98   53.14
  -5  13 -14   23.74   28.63
  -5  13 -14   76.63   42.32
   5  13  14    7.69   63.75
  -5 -13 -14   39.03   28.51
   5  13  15  429.54  193.98
  -5  13 -15  448.56  103.50
  -5 -13 -15  481.84  138.45
   5 -13  15  465.71  112.07
   5  13  16  517.32  289.78
  -5 -13 -16  562.87  158.63
   5 -13  16  537.97  122.61
   5  13  17  163.61   46.32
  -5 -13 -17  262.68   57.75
   5 -13  17  147.16   62.07
   5  13  18   47.12   45.01
  -5 -13 -18   24.00   30.14
   5 -13  18   36.52   53.45
  -5  15  19  342.21  145.00
  -5 -15  19  261.69   89.15
  -5  15  18   68.41   22.65
  -5  15  18   11.90   27.36
  -5  15  17  191.30   54.02
  -5  15  17  134.60   97.80
  -5 -15  17  186.49   80.59
  -5  15  16  191.69   68.40
   5  15 -16   25.20   21.14
  -5  15  16  -51.17   63.66
  -5  15  15  369.71  119.93
   5  15 -15  337.86  116.88
  -5  15  15  436.28  175.78
  -5  15  14  407.49  114.25
   5  15 -14  405.49  108.21
  -5  15  13   36.72   44.95
   5  15 -13   10.57   15.73
  -5  15  13   34.12   31.06
  -5  15  12   34.05   31.35
   5  15 -12   59.78   37.00
  -5  15  12   71.07   57.96
  -5  15  11  483.27  146.13
   5  15 -11  526.09  128.67
  -5  15  11  547.27  174.36
  -5  15  10   39.99   21.50
   5  15 -10   -8.14   35.32
  -5  15  10  -31.38   64.70
  -5  15   9 1445.39   98.24
   5  15  -9 1373.61  108.45
  -5  15   9 1601.26  295.29
  -5  15   8  438.58  113.59
   5  15  -8  371.02  103.41
  -5  15   8  517.47  147.02
  -5  15   7 1233.81   75.34
   5  15  -7 1106.93  246.16
  -5  15   7 1494.54  117.18
  -5  15   6 3742.74   76.79
   5  15  -6 3778.34  101.52
  -5  15   6 4036.32  172.76
  -5  15   5  328.94   96.31
   5  15  -5  330.69   81.17
  -5  15   5  485.60  139.13
  -5  15   4  893.32   37.46
   5  15  -4  935.38   89.89
  -5  15   4  869.23  207.32
  -5  15   3  887.26   40.26
   5  15  -3  986.51  194.69
  -5  15   3 1109.50  165.06
  -5  15   2   19.41   13.32
   5  15  -2   63.19   55.81
  -5  15   2   27.99   31.95
  -5  15   1  233.41   54.06
  -5  15   1  272.95   60.76
  -5  15   1  480.71  104.67
   5  15  -1  187.79   59.41
   5  15   0  360.39   19.38
  -5  15   0  480.01   82.92
   5  15   0  351.36   14.78
  -5  15   0  452.27  105.69
   5  15   0  516.54  107.11
   5  15   1 1087.87   34.66
  -5  15  -1 1227.87   37.23
   5  15   1 1114.71   52.14
   5  15   1 1196.46  252.59
  -5  15  -1 1162.88  252.40
   5 -15   1  985.57   39.21
   5  15   2  110.22   21.92
  -5  15  -2   81.38   28.71
   5  15   2  105.19   24.49
   5  15   2  207.31   59.73
  -5  15  -2  103.24   37.24
   5 -15   2   55.32   33.61
  -5  15  -3  323.12   56.70
   5  15   3  295.10   64.24
  -5  15  -3  323.92  100.86
   5  15   3  338.32   78.76
  -5  15  -4  880.65   63.68
   5  15   4  803.14   42.51
  -5  15  -4  898.02  234.65
   5  15   4  879.33  166.19
  -5  15  -5  351.49   65.76
   5  15   5  239.04   43.77
  -5  15  -5  391.85  119.37
   5  15   5  293.33   81.99
  -5  15  -6 1259.52   36.69
   5  15   6 1231.37   46.01
  -5  15  -6 1186.55   85.41
   5  15   6 1261.29  134.00
  -5  15  -7   94.13   22.71
   5  15   7  156.65   41.52
  -5  15  -7  106.50   32.92
   5  15   7  140.89   58.15
  -5  15  -8   16.04   12.36
   5  15   8   20.54   20.31
  -5  15  -8   -4.01   52.50
   5  15   8   58.94   46.70
  -5  15  -9   40.13   26.83
   5  15   9   32.08   21.32
  -5  15  -9   -1.08   33.50
   5  15   9   36.14   66.20
  -5  15 -10  751.05   82.21
  -5  15 -10  791.27  163.81
   5  15  10 1013.33  334.03
   5  15  11 1498.33  310.41
  -5  15 -11 1323.43   87.61
  -5 -15 -11  966.01  181.33
   5  15  12  126.71   70.91
  -5  15 -12  110.16   46.87
  -5 -15 -12   49.15   18.08
   5  15  13  269.19  124.42
  -5  15 -13  305.98  104.11
  -5 -15 -13  188.26   76.81
  -5  15 -14   25.63   42.77
   5  15  14   56.71   43.03
  -5  15 -15  -14.52   54.09
   5  15  15   58.87   58.33
   5  15  16   74.57   42.70
   5  15  16  130.49   90.34
   5 -15  16   84.86   53.71
   5  15  17  -33.27   43.37
   5  15  17   -0.49   69.66
   5 -15  17   68.01   44.20
   5  15  18  132.39   51.56
  -5  17  18   47.53   44.41
  -5 -17  18   25.52   35.53
  -5  17  17   54.95   40.73
  -5  17  17   43.91   41.26
  -5 -17  17   21.00   13.55
  -5  17  16   85.45   34.16
   5  17 -16   74.95   39.75
  -5  17  16  114.43   62.45
  -5  17  15   18.58   55.33
   5  17 -15   27.95   36.40
  -5  17  15   81.62   56.72
  -5  17  14  -32.60   48.26
   5  17 -14  118.52   46.35
  -5  17  14  154.95   76.40
  -5  17  13  191.79  104.28
   5  17 -13   71.77   38.73
  -5  17  13  221.51   88.07
  -5  17  12   74.12   33.59
   5  17 -12   54.41   38.75
  -5  17  12  -13.90   59.61
  -5  17  11  243.28   94.08
   5  17 -11  303.06   77.08
  -5  17  11  228.07   71.10
  -5  17  10   36.17   30.18
   5  17 -10   10.85   19.20
  -5  17  10  126.40   54.97
  -5  17   9   90.47   42.50
   5  17  -9  196.65   85.18
  -5  17   9  173.76   77.09
  -5  17   8 1143.64   51.44
   5  17  -8 1203.03  156.15
  -5  17   8 1386.56  143.03
  -5  17   7  467.85  119.72
   5  17  -7  475.74   90.44
  -5  17   7  402.34  142.36
  -5  17   6  522.50   74.41
   5  17  -6  514.59  118.74
  -5  17   6  296.68  134.02
  -5  17   5 1167.37   54.82
   5  17  -5 1287.53  203.58
  -5  17   5 1228.47  111.73
  -5  17   4 1584.55   53.95
   5  17  -4 1654.21  138.44
  -5  17   4 1872.20  118.89
  -5  17   3  945.03   66.61
   5  17  -3  899.98   61.08
  -5  17   3  847.90  112.92
  -5  17   2 2374.93   66.11
   5  17  -2 2444.35  101.71
  -5  17   2 2406.66  286.54
  -5  17   1   69.70   32.01
  -5  17   1   92.10   53.78
   5  17  -1  133.12   75.48
  -5  17   0  209.31   46.73
  -5  17   0  176.81   56.93
   5  17   0  225.17   84.12
  -5  17  -1  136.02   30.26
  -5  17  -1  221.12   89.13
   5  17   1  198.71   60.76
  -5  17  -2  235.80   46.02
   5  17   2  165.09   36.11
  -5  17  -2  379.56  146.20
   5  17   2  226.24   72.32
  -5  17  -3   96.40   21.59
   5  17   3   60.36   20.81
  -5  17  -3  194.76   68.43
   5  17   3   46.03   47.87
   5  17   4   14.78   18.74
  -5  17  -4   72.78   31.59
   5  17   4   19.65   26.65
   5  17   5 1559.43   98.36
  -5  17  -5 1843.53  132.75
   5  17   5 1614.39  191.27
   5  17   6  234.94   55.87
  -5  17  -6  183.53   56.45
   5  17   6   96.54   69.91
   5  17   7  485.85   84.64
  -5  17  -7  414.15  196.40
   5  17   7  486.67  170.70
   5  17   8   54.52   29.57
  -5  17  -8   81.71   44.13
   5  17   8   92.98   44.03
   5  17   9  299.58   90.20
  -5  17  -9  348.65  108.24
   5  17   9  502.53  172.24
   5  17  10   34.81   39.22
  -5  17 -10  107.89   49.51
   5  17  10   22.02   58.33
   5  17  11 1430.90  113.96
  -5  17 -11 1577.40  124.45
   5  17  11 1568.10  141.06
   5  17  12   39.20   35.05
  -5  17 -12   95.16   33.98
   5  17  12  -18.85   61.68
   5  17  13    2.70   31.94
  -5  17 -13   81.16   49.12
   5  17  13   89.52   48.12
   5  17  14   62.74   36.72
  -5  17 -14   -1.71   41.38
   5  17  14   77.01   68.18
   5  17  15   35.32   40.97
  -5  17 -15   81.84   37.55
   5  17  15  -13.56   65.30
   5  17  16   79.91   43.30
   5  17  17   76.06   32.05
  -5  19  17   88.91   54.94
   5  19 -17   48.13   36.56
  -5  19  16   48.95   26.21
   5  19 -16  -21.63   35.43
  -5  19  15   34.88   31.14
   5  19 -15  110.20   46.75
  -5  19  15  107.24   76.08
  -5  19  14  754.74  139.38
   5  19 -14  746.08  213.60
  -5  19  14  695.60  274.10
  -5  19  13  139.93   59.36
   5  19 -13  182.65   76.32
  -5  19  13  168.67   63.80
  -5  19  12   88.76   33.68
   5  19 -12   39.91   48.72
  -5  19  12  135.20   90.16
  -5  19  11   22.90   17.98
   5  19 -11   -0.05   50.87
  -5  19  11   37.82   38.92
  -5  19  10   22.81   19.42
   5  19 -10  -21.90   47.30
  -5  19  10  -15.33   58.99
  -5  19   9   38.17   23.08
   5  19  -9   83.30   41.31
  -5  19   9   50.35   35.59
  -5  19   8  109.16   36.18
   5  19  -8  124.41   56.07
  -5  19   8  112.89   50.68
  -5  19   7  439.14  104.97
   5  19  -7  659.87  145.29
  -5  19   7  458.95  193.92
  -5  19   6   12.20   19.36
   5  19  -6   55.43   72.13
  -5  19   6  100.24   61.18
  -5  19   5  144.82   36.98
   5  19  -5  232.19  104.95
  -5  19   5  215.72   87.02
  -5  19   4   59.10   25.43
   5  19  -4   76.19   70.01
  -5  19   4  -15.42   63.39
   5  19  -3   70.72   26.86
  -5  19   3   67.84   54.36
   5  19  -2  -13.98   48.28
  -5  19   2   45.34   32.77
  -5  19   1  141.92   67.61
   5  19  -1   70.00   31.76
  -5  19   0   67.41   41.91
   5  19   0   24.59   48.78
  -5  19  -1   45.96   33.87
   5  19   1   58.46   37.66
  -5  19  -2   29.78   36.68
   5  19   2   12.25   28.65
  -5  19  -3  231.81  128.77
   5  19   3  222.16  109.39
  -5  19  -4  -24.14   67.24
   5  19   4   11.90   50.88
  -5  19  -5   53.37   37.95
   5  19   5  106.65   37.51
  -5  19  -6  221.58  151.06
   5  19   6  311.73  143.01
  -5  19  -7   36.29   30.46
   5  19   7  -14.66   71.66
  -5  19  -8  540.38  100.41
   5  19   8  616.72  178.97
  -5  19  -9  188.29   46.57
   5  19   9  134.27   60.46
  -5  19 -10  308.55   91.78
   5  19  10  353.81  160.08
   5  19  11  160.34   50.02
  -5  19 -11   95.40   71.52
   5  19  11  122.84   52.43
   5  19  12  237.66   53.31
  -5  19 -12  188.46   85.93
   5  19  12  337.37   98.32
   5  19  13   78.14   30.56
  -5  19 -13   88.65   45.65
   5  19  13  101.53   68.49
   5  19  14  -22.17   35.39
  -5  19 -14   69.80   53.86
   5  21 -15  135.26   80.40
   5  21 -14  906.32  235.92
   5  21 -13  389.26   66.73
  -5  21  13  150.77  114.11
   5  21 -12  -19.13   42.00
  -5  21  12   75.73   79.19
   5  21 -11  458.62  119.81
  -5  21  11  229.90  128.49
   5  21 -10 1065.63  183.52
  -5  21  10 1038.13  103.93
   5  21  -9  152.75   49.32
  -5  21   9   97.03   75.97
   5  21  -8 1582.39  306.87
  -5  21   8 1497.94  147.36
   5  21  -7   57.99   43.20
  -5  21   7   85.68   39.99
   5  21  -6  199.72  143.89
  -5  21   6  -15.85   61.42
   5  21  -5   34.66   35.82
  -5  21   5   73.05   42.29
   5  21  -4  -19.19   49.59
  -5  21   4    3.33   38.01
   5  21  -3 1732.63  173.46
  -5  21   3 1833.27  126.93
   5  21  -2   70.59   35.82
  -5  21   2   -1.14   73.46
  -5  21   1   87.56   54.32
   5  21  -1  130.82   62.82
  -5  21   0  539.25  149.05
   5  21   0  515.15  201.47
  -5  21  -1  167.33   65.47
   5  21   1  154.71   83.11
  -5  21  -2   51.82   41.28
   5  21   2   49.24   41.94
  -5  21  -3  348.22   74.92
   5  21   3  354.35  134.24
  -5  21  -4  147.43   68.33
   5  21   4  122.97   51.18
  -5  21  -5 1378.22  306.83
   5  21   5 1292.92  283.72
  -5  21  -6  213.81   91.12
   5  21   6   55.63   32.53
  -5  21  -7   43.71   58.36
   5  21   7  -54.60   65.64
  -5  21  -8  190.15   98.25
   5  21   8   77.93   66.05
  -5  21  -9    1.61   41.78
   5  21   9   82.50   50.15
  -5  21 -10   45.58   43.70
   5  21  10   94.83   64.12
  -5  21 -11   76.72   35.31
   5  21  11   51.26   44.55
  -5  21 -12 -113.17   51.55
   5  23 -12   -2.44   33.81
   5  23 -11   86.46   32.92
   5  23 -10  -31.06   43.40
   5  23  -9  105.49   35.67
  -5  23   9  125.67   66.33
   5  23  -8   57.01   20.43
  -5  23   8   61.90   43.48
   5  23  -7  -19.68   44.31
  -5  23   7  118.41   46.78
   5  23  -6  159.53   55.00
  -5  23   6   85.53   56.01
   5  23  -5  322.39   72.99
  -5  23   5  241.97  122.27
   5  23  -4  263.09   89.53
   5  23  -3   92.11   35.95
  -5  23   3  202.41   74.14
   5  23  -2  101.68   40.84
  -5  23   1   73.62   40.35
   5  23  -1  132.61   48.80
  -5  23   0  175.35   76.27
   5  23   0  111.54   58.55
  -5  23  -1  207.42   91.33
   5  23   1  116.00   69.04
  -5  23  -2   41.53   41.21
   5  23   2   56.82   66.88
  -5  23  -3   94.53   34.04
   5  23   3    9.92   42.32
  -5  23  -4   34.29   45.02
   5  23   4  136.58   54.59
  -5  23  -5  592.25  112.67
   5  23   5  547.14  231.22
  -5  23  -6   58.01   60.96
   5  23   6   28.98   63.57
  -5  23  -7   62.50   42.74
   5  23   7   57.51   37.85
  -5  23  -8   50.23   58.24
   5  23   8  158.17   74.29
  -5  23  -9   37.06   26.07
   5  25  -7   91.81   37.98
   5  25  -6   69.39   40.15
   5  25  -5  553.30  133.22
   5  25  -4   37.53   23.06
  -5  25   4   46.28   34.49
   5  25  -3   18.73   43.75
  -5  25   3   22.90   35.73
   5  25  -2  177.28   90.28
  -5  25   2  151.60   49.59
  -5  25   1   29.93   36.64
   5  25  -1   49.18   42.58
  -5  25   0  395.43  155.56
   5  25   0  384.45  151.12
  -5  25  -1  267.33   93.00
   5  25   1   56.13   39.38
  -5  25  -2  100.28   50.54
   5  25   2   74.75   54.06
  -5  25  -3   46.12   50.03
   5  25   3  -16.22   27.42
  -6   0  23   72.86   41.91
  -6   0  22 1457.85  123.89
  -6   0  22 1359.91  171.43
  -6   0  21   19.12   43.94
  -6   0  20 1451.22  141.73
   6   0 -19  -19.58   51.76
  -6   0  19   18.21   19.96
   6   0 -18  431.20  109.74
  -6   0  18  533.69  125.44
   6   0 -17  -64.57   51.34
  -6   0  17    4.09   22.23
   6   0 -16  223.16   51.62
  -6   0  16  188.83   55.13
   6   0 -15  106.31   36.32
  -6   0  15  -23.23   44.56
   6   0 -14 3014.97  122.95
  -6   0  14 3294.19  222.41
   6   0 -13   25.56   38.65
  -6   0  13   26.33   32.58
   6   0 -12  769.48   47.63
  -6   0  12  923.78  103.65
   6   0 -11   52.15   35.54
  -6   0  11   35.13   32.12
   6   0 -10 5582.82  139.63
  -6   0  10 5846.25  140.28
   6   0  -9   44.40   60.38
  -6   0   9    8.27   26.32
   6   0  -9   50.51   13.10
   6   0  -813249.15  196.69
  -6   0   813951.80  194.68
  -6   0   7  -36.06   30.79
  -6   0   7   43.05   26.57
   6   0  -7   -7.20   24.05
  -6   0   6 1747.76   63.92
  -6   0   6 1745.53   81.89
  -6   0   6 1944.70   66.40
   6   0  -6 1831.28   60.80
  -6   0   5   47.39   34.24
  -6   0   5   30.95   30.77
  -6   0   5  -18.80   16.66
   6   0  -5   19.81   14.34
  -6   0   4   61.75   34.90
   6   0  -4   25.45   20.07
  -6   0   4   60.30   20.86
   6   0  -4   74.91   26.12
  -6   0   3   22.64   21.35
   6   0  -3   19.86   26.76
  -6   0   3    3.53    7.12
   6   0  -3   25.09   12.85
  -6   0   275567.00  431.93
   6   0  -273746.21  421.43
  -6   0   275118.14  412.48
  -6   0   1   30.80   20.10
   6   0  -1   54.52   28.50
  -6   0   1   27.34   11.15
   6   0  -1   36.91   19.46
  -6   0   0 5844.71  123.49
   6   0   0 5621.52   48.78
   6   0   0 5301.02  106.92
   6   0   0 5597.98   81.92
  -6   0  -1   42.20   19.58
   6   0   1   28.85   15.67
   6   0   1   23.58   19.23
   6   0   1   25.29   17.87
  -6   0  -2  108.46   43.09
   6   0   2   88.63   29.64
   6   0   2  110.82   37.22
  -6   0  -3  -11.19   40.55
   6   0   3  -11.60   18.33
   6   0   3   43.18   38.06
  -6   0  -3    8.73   15.44
  -6   0  -4 6145.89  135.87
   6   0   4 6106.81  129.61
   6   0   4 6084.34  134.60
  -6   0  -4 5600.33   60.96
  -6   0  -5   75.69   39.58
   6   0   5   -9.21   24.48
   6   0   5    6.33   19.73
  -6   0  -5   29.33   27.42
  -6   0  -610490.56  161.22
   6   0   610040.57  156.10
  -6   0  -7   54.16   32.46
   6   0   7   18.63   24.79
  -6   0  -8  197.30   66.31
   6   0   8  216.57   92.15
  -6   0  -9    7.13   46.01
   6   0   9   26.80   30.26
  -6   0 -10  184.29   59.29
   6   0  10  361.41   60.94
  -6   0 -11   -7.94   48.49
   6   0  11  -85.37   48.74
  -6   0 -1215040.94  173.24
   6   0  1214853.01  315.45
  -6   0 -13   48.89   48.31
   6   0  13   33.82   46.41
  -6   0 -14 2337.09  169.56
   6   0  14 2429.61  169.26
  -6   0 -15  -12.91   59.29
   6   0  15   75.62   39.80
  -6   0 -16   81.78   64.45
   6   0  16  183.25   73.64
  -6   0 -17  -12.68   66.90
   6   0  17   -9.00   55.59
  -6   0 -18   36.78   47.40
   6   0  18  135.65   72.58
  -6   0 -19  -11.20   54.39
   6   0  19   88.05   41.95
  -6   0 -20  261.23   72.79
   6   0  20  326.76  107.07
  -6   0 -21   53.89   48.57
  -6   2  23   70.26   33.80
  -6  -2  23   82.34   58.36
  -6  -2  23   33.19   46.59
  -6   2  22  111.24   60.74
  -6   2  22  171.50   44.45
  -6  -2  22  151.33   70.79
  -6  -2  22   60.20   20.77
  -6   2  21   97.00   73.32
  -6   2  21   61.35   35.44
  -6  -2  21   57.07   53.85
  -6  -2  21   51.42   27.15
   6   2 -20    3.14   57.34
  -6   2  20   75.69   46.28
  -6   2  20   63.97   33.40
  -6  -2  20   68.99   40.07
   6   2 -19  607.20  199.78
  -6   2  19  742.48   90.99
  -6  -2  19  607.37  141.79
  -6   2  18  369.25  102.95
   6   2 -18  377.38   91.69
   6  -2 -18  337.24  128.01
  -6  -2  18  361.45   71.88
  -6   2  17  809.15   80.80
   6   2 -17  696.32  220.77
   6  -2 -17  738.14  231.36
  -6  -2  17  912.58   67.47
  -6   2  16 1242.88  106.41
   6   2 -16  959.82  175.85
   6  -2 -16  934.89  241.57
  -6  -2  16 1118.09  153.33
  -6   2  15   82.69   30.75
   6   2 -15    8.99   43.32
   6  -2 -15   49.28   44.72
  -6  -2  15   18.84   21.95
  -6   2  14 3686.51  249.51
   6   2 -14 3425.03  108.42
   6  -2 -14 3424.37  116.92
  -6  -2  14 3732.99  138.48
  -6   2  13  432.24  143.91
   6   2 -13  430.30  118.45
   6  -2 -13  453.42   94.14
  -6  -2  13  389.40  112.00
  -6   2  12  977.60   70.65
   6   2 -12  926.80   46.34
   6  -2 -12 1089.29  140.61
  -6  -2  12 1089.26  108.74
  -6   2  11 3391.43  109.03
   6   2 -11 3328.71  178.87
   6  -2 -11 3311.71  135.31
  -6  -2  11 3177.32  147.12
  -6   2  10   60.84   22.70
   6   2 -10   77.94   39.26
   6  -2 -10   99.72   38.40
  -6  -2  10   26.51   20.60
   6   2  -9 1955.15   71.12
  -6   2   9 2302.57  160.26
   6  -2  -9 1952.56   70.21
  -6  -2   9 1860.88   78.44
  -6  -2   9 2117.00   76.35
   6  -2  -9 2040.80   75.92
   6   2  -8 1716.51   69.56
  -6   2   8 2200.11   74.92
  -6  -2   8 1713.08   36.32
  -6  -2   8 1918.23   72.96
   6  -2  -8 2016.67   87.47
  -6  -2   8 1870.74   43.86
   6   2  -7  466.85  143.94
  -6   2   7  561.18  139.86
  -6   2   7  564.92  133.82
  -6  -2   7  477.87   53.50
  -6  -2   7  486.54   34.16
   6  -2  -7  488.06   91.74
  -6  -2   7  507.41   57.94
  -6   2   6 2182.92   77.56
  -6   2   6 2499.43   86.41
  -6   2   6 2397.10  162.04
  -6  -2   6 2289.48   77.41
  -6  -2   6 2234.32   77.63
  -6  -2   6 2401.92   83.19
   6  -2  -6 2304.56  105.55
  -6  -2   6 2340.74   78.40
  -6   2   5  572.04   53.94
  -6   2   5  760.38   72.04
  -6   2   5  715.46   63.09
  -6  -2   5  608.22   29.15
  -6  -2   5  711.75   42.10
  -6  -2   5  702.44   74.57
   6  -2  -5  676.10   47.98
  -6  -2   5  775.62   45.00
   6   2  -4 1013.47   29.91
  -6   2   4 1040.88   58.03
  -6   2   4 1194.21   58.51
   6  -2  -4 1015.89   72.74
  -6  -2   4  946.05   34.70
  -6  -2   4  994.91   52.01
  -6  -2   4 1067.64   42.20
   6   2  -3 1661.00   51.29
  -6   2   3 1790.75   79.53
  -6   2   3 1875.99   82.31
   6   2  -3 1634.99   57.29
  -6  -2   3 1605.46   75.26
  -6  -2   3 1607.12   48.57
   6  -2  -3 1675.54   61.55
   6  -2  -3 1777.15   56.97
   6   2  -2 2157.26   64.59
  -6   2   2 1886.38   71.63
   6   2  -2 2002.05   61.80
  -6   2   2 1943.23   62.63
   6  -2  -2 1853.30   70.13
  -6  -2   2 2098.10   65.61
   6  -2  -2 1958.99   73.36
  -6  -2   2 2049.81   67.84
  -6   2   175183.34  426.09
   6   2  -178675.09  439.94
   6  -2  -174739.31  438.36
   6  -2  -176009.66  429.15
  -6  -2   175702.25  432.02
  -6   2   0 9082.18  181.72
   6   2   0 8614.03  167.54
  -6   2   0 8667.20  171.77
   6   2   0 8962.81  175.45
   6  -2   0 8555.37  167.86
   6  -2   0 8664.05  170.00
  -6  -2   0 9063.73  177.54
  -6  -2   0 8738.62  169.52
   6   2   117929.09  119.57
  -6   2  -118673.20  133.00
  -6   2  -117935.56  125.26
   6   2   118078.61  124.99
   6  -2   117952.64  123.72
   6  -2   117498.40  134.64
  -6  -2  -118417.58  123.74
  -6   2  -2 4808.88  161.96
   6   2   2 4876.26  119.19
  -6   2  -2 4579.88  157.08
   6   2   2 4851.51  120.80
   6  -2   2 4532.35  113.21
   6  -2   2 4293.83  137.37
  -6  -2  -2 4936.38  130.33
  -6  -2  -2 4833.87  123.66
  -6   2  -3 5573.03   68.56
   6   2   3 5151.53  125.01
  -6   2  -3 5244.33   68.62
   6   2   3 5373.93  134.66
   6  -2   3 5241.85  129.79
   6  -2   3 4894.10  121.29
  -6  -2  -3 5328.11  133.37
  -6  -2  -3 5002.82  126.48
   6   2   4 5972.43  125.45
  -6   2  -4 6801.92  199.30
  -6   2  -4 6425.29  241.85
   6   2   4 6157.26  134.35
   6  -2   4 6401.86  135.07
   6  -2   4 5818.54  123.90
  -6  -2  -4 6105.79  133.14
  -6  -2  -4 5686.91  122.01
   6   2   5 4389.28  183.84
  -6   2  -5 4062.77  112.19
   6   2   5 4000.01   56.50
   6  -2   5 3799.18  117.39
   6  -2   5 3158.42  118.17
  -6  -2  -5 4054.47  114.85
  -6  -2  -5 3789.08  128.38
   6  -2   5 3463.70  126.41
  -6   2  -6 2926.49  120.56
  -6  -2  -6 2990.11  106.00
   6  -2   6 2953.10  138.68
   6   2   7 2691.88  151.60
  -6   2  -7 2068.82  109.83
  -6  -2  -7 2299.45   93.70
   6  -2   7 2147.33  118.61
   6   2   8 2249.48  108.11
  -6   2  -8 2109.02   83.65
  -6  -2  -8 2022.57  148.35
   6  -2   8 2280.19  140.70
   6   2   9 2540.56  197.34
  -6   2  -9 2248.51   99.73
  -6  -2  -9 2198.85   98.46
   6  -2   9 2368.00  142.96
   6   2  10 1026.46  219.37
  -6   2 -10  835.26   83.14
  -6  -2 -10  809.18  222.71
   6  -2  10 1007.31  203.92
   6   2  11  581.19  113.43
  -6   2 -11  415.64  128.47
  -6  -2 -11  184.93   70.24
   6  -2  11  331.99  107.57
   6   2  12 2249.58  183.10
  -6   2 -12 2196.31   81.73
  -6  -2 -12 2095.82   86.38
   6  -2  12 2290.89  134.26
   6   2  13 3266.15  103.33
  -6   2 -13 2773.97   92.34
  -6  -2 -13 2881.51  101.38
   6  -2  13 2775.49   91.42
   6   2  14   78.42   51.28
  -6   2 -14   80.85   31.58
  -6  -2 -14   31.65   73.69
   6  -2  14   78.97   50.22
   6   2  15  303.80   77.57
  -6   2 -15  218.12   48.81
  -6  -2 -15  339.66  103.84
   6  -2  15  136.97   65.27
   6   2  16   78.34   55.28
  -6   2 -16  106.52   43.89
  -6  -2 -16   83.18   36.59
   6  -2  16   47.31   58.71
   6   2  17   82.69   36.95
  -6   2 -17  106.82   56.38
  -6  -2 -17   83.65   35.56
   6  -2  17  163.33   78.84
   6   2  18 1020.21  118.16
  -6   2 -18  975.98  257.66
  -6  -2 -18  948.21  210.26
   6  -2  18  722.95  222.50
   6   2  19  103.38   28.16
  -6   2 -19   62.30   32.37
  -6  -2 -19   54.56   30.31
   6  -2  19   32.76   54.98
   6   2  20  159.45   71.31
  -6   2 -20  225.82   76.56
  -6  -2 -20  228.81   76.50
   6  -2  20  185.77  109.00
   6   2  21   60.52   37.94
  -6   2 -21   39.69   51.35
  -6  -2 -21  162.77   53.78
   6  -2  21  -42.19   55.64
  -6   4  23   53.02   44.79
  -6  -4  23   49.45   39.99
  -6  -4  23    8.60   33.16
  -6   4  22  246.18   76.45
  -6   4  22  149.49   51.84
  -6  -4  22  144.34   52.14
  -6   4  21   85.76   35.78
  -6   4  21  129.85   67.19
  -6  -4  21   48.66   45.57
  -6  -4  21   19.16   20.23
   6   4 -20   52.75   50.38
  -6   4  20   82.76   62.28
  -6   4  20   56.88   41.90
  -6  -4  20   23.53   22.86
   6   4 -19  573.74  172.71
  -6   4  19  782.72  193.50
  -6   4  19  503.78  193.98
  -6  -4  19  633.07   82.67
   6   4 -18  128.36   57.68
  -6   4  18  166.40   91.38
  -6   4  18  121.82   44.68
  -6  -4  18   92.40   49.81
   6   4 -17  247.03   69.72
  -6   4  17  258.32   76.19
  -6  -4  17  279.31   70.42
  -6   4  16   24.24   16.44
   6   4 -16   54.56   34.96
   6  -4 -16  122.17   64.07
  -6  -4  16   71.18   46.33
  -6   4  15   49.43   24.96
   6   4 -15   80.06   27.42
   6  -4 -15   56.48   45.35
  -6  -4  15  114.46   51.04
  -6   4  14  528.90  133.87
   6   4 -14  391.35  156.09
   6  -4 -14  483.78   95.71
  -6  -4  14  427.80  101.97
  -6   4  13 2397.37  197.26
   6   4 -13 1832.32  149.72
   6  -4 -13 2064.84   97.93
  -6  -4  13 2366.41  199.43
  -6   4  12   40.68   36.21
   6   4 -12   41.58   20.64
   6  -4 -12   45.61   54.91
  -6  -4  12  119.78   35.66
  -6   4  11   35.76   26.42
   6   4 -11   52.66   41.58
   6  -4 -11   26.12   35.87
  -6  -4  11   59.96   27.39
   6   4 -10   62.59   31.91
  -6   4  10   22.05   18.29
  -6  -4  10   32.05   14.23
   6   4  -9  906.70   61.68
  -6   4   9 1126.95   74.52
  -6   4   9 1251.33  127.60
  -6  -4   9  922.17   60.64
  -6  -4   9  890.17   48.36
   6   4  -8 5557.82  133.56
  -6   4   8 5325.50  130.28
  -6   4   8 5445.78  125.81
  -6  -4   8 5433.21  152.55
  -6  -4   8 4924.11  114.74
   6   4  -7  205.27   61.22
   6   4  -7  168.25   56.18
  -6   4   7  238.55   63.10
  -6   4   7  273.95   78.90
  -6  -4   7  130.59   31.58
  -6  -4   7  151.84   31.95
   6  -4  -7  177.61   41.68
  -6   4   6 1510.91   54.01
  -6   4   6 1717.04  118.91
  -6   4   6 1674.52  102.53
   6   4  -6 1538.21   50.81
  -6  -4   6 1475.81   49.44
  -6  -4   6 1413.22   41.46
  -6  -4   6 1451.81   44.42
   6  -4  -6 1583.79   52.16
  -6   4   5  345.62   66.16
  -6   4   5  364.58   98.91
  -6   4   5  335.03   88.68
   6   4  -5  374.89   60.81
  -6  -4   5  315.88   24.13
  -6  -4   5  327.23   28.83
  -6  -4   5  314.89   51.97
   6  -4  -5  352.41   89.22
   6   4  -4  333.22   62.19
  -6   4   4  297.93   70.60
  -6   4   4  152.72   50.15
   6  -4  -4  218.03   60.31
  -6  -4   4  233.07   23.74
  -6  -4   4  260.60   51.57
  -6  -4   4  320.39   68.79
   6  -4  -4  201.56   38.49
   6   4  -3 6853.12  138.47
  -6   4   3 6683.26  139.25
  -6   4   3 6692.33  142.16
   6   4  -3 6716.06  136.81
  -6  -4   3 6621.84  129.69
  -6  -4   3 6446.72  142.54
   6  -4  -3 6370.34  135.89
   6  -4  -3 6646.44  141.86
  -6   4   254847.50  328.84
   6   4  -253026.26  299.88
   6   4  -255592.51  324.70
  -6   4   254344.43  322.31
   6  -4  -252233.28  325.29
   6  -4  -254313.21  321.96
  -6  -4   254850.71  320.79
  -6   4   1  887.18   43.39
   6   4  -1  787.16   29.70
  -6   4   1  975.34   73.56
   6   4  -1  893.34   59.03
   6  -4  -1  864.95   41.48
   6  -4  -1  938.02   63.51
  -6  -4   1  885.20   30.38
  -6  -4   1  830.23   63.23
  -6   4   0 1002.33   99.24
   6   4   0 1116.70   26.26
  -6   4   0 1078.23   58.48
   6   4   0 1177.38   46.57
   6  -4   0 1035.49   39.06
   6  -4   0 1085.10   38.01
  -6  -4   0 1233.65   35.08
  -6  -4   0 1114.24   51.11
  -6   4  -1 9160.86  203.51
   6   4   1 8747.14  172.99
  -6   4  -1 8938.95  194.87
   6   4   1 9184.08  185.71
   6  -4   1 8386.09  169.20
   6  -4   1 8854.12  177.03
  -6  -4  -1 9073.42  178.27
  -6  -4  -1 8489.64  174.12
  -6   4  -226999.31  186.74
   6   4   227561.61  184.60
   6  -4   226929.53  199.04
   6  -4   226235.13  194.62
  -6  -4  -227476.79  179.33
  -6  -4  -226713.39  180.22
  -6   4  -3  922.57   70.70
   6   4   3  869.29   34.62
  -6   4  -3  978.25   56.87
   6   4   3  897.82   48.61
   6  -4   3  908.55   71.82
   6  -4   3  864.19   36.84
  -6  -4  -3  795.89   85.08
  -6  -4  -3  791.47   69.65
  -6   4  -4 3333.08  148.31
   6   4   4 3344.17  103.53
  -6   4  -4 3374.49  115.62
   6   4   4 3585.53  154.37
   6  -4   4 3060.03   95.58
   6  -4   4 2860.62   92.25
  -6  -4  -4 3434.60  115.87
  -6  -4  -4 3314.14  106.32
   6   4   5 1100.76   59.90
   6   4   5  919.76   36.83
  -6   4  -5  977.85   58.31
  -6   4  -5  845.21   43.58
   6  -4   5  915.38   35.75
  -6  -4  -5 1081.10  111.12
  -6   4  -6 1511.80   65.39
  -6   4  -6 1791.65   71.64
   6   4   6 1705.67   69.80
  -6  -4  -6 1717.02   57.03
  -6   4  -7  -18.22   43.93
  -6   4  -7   -7.06   44.67
   6   4   7    3.89   21.68
  -6  -4  -7  -66.98   36.89
   6   4   8 1308.78   73.77
  -6   4  -8 1227.39  130.47
  -6  -4  -8 1299.76   59.54
   6  -4   8 1187.12   68.43
   6   4   9  223.84   77.23
  -6   4  -9  250.57   75.21
  -6  -4  -9  143.37   69.81
   6  -4   9  217.16   55.59
   6   4  10 1481.25  110.25
  -6   4 -10 1551.21  112.73
  -6  -4 -10 1473.79   77.09
   6  -4  10 1622.47  106.27
   6   4  11  288.05   44.57
  -6   4 -11  195.73   97.30
  -6  -4 -11  335.15   80.36
   6  -4  11  149.44   37.54
   6   4  12   -6.62   53.74
  -6   4 -12  -49.94   50.75
  -6  -4 -12 -135.10   54.46
   6  -4  12   54.06   31.55
   6   4  13  478.26   87.01
  -6   4 -13  439.58  122.40
  -6  -4 -13  510.42  124.71
   6  -4  13  531.12   76.69
   6   4  14  382.38  124.18
  -6   4 -14  331.14   96.91
  -6  -4 -14  380.59  157.03
   6  -4  14  158.71   64.75
   6   4  15  112.49   69.94
  -6   4 -15    1.65   29.22
  -6  -4 -15  112.42   85.13
   6  -4  15   64.61   29.38
   6   4  16   67.35   38.89
  -6   4 -16   78.12   70.76
  -6  -4 -16   64.81   57.00
   6  -4  16   83.38   39.67
   6   4  17   96.49   53.56
  -6   4 -17   55.65   32.68
  -6  -4 -17  137.39   92.24
   6  -4  17   73.84   48.91
   6   4  18   25.39   29.77
  -6   4 -18   19.24   19.87
  -6  -4 -18  -28.03   58.19
   6  -4  18   92.68   57.48
   6   4  19   37.96   49.59
  -6   4 -19  -31.12   54.84
  -6  -4 -19   84.95   37.35
   6  -4  19   50.70   41.33
   6   4  20   27.79   42.77
  -6   4 -20   71.22   37.97
  -6  -4 -20   42.56   41.17
   6  -4  20   29.73   34.99
  -6   4 -21   70.33   36.50
   6   4  21   22.14   37.30
   6  -4  21   24.80   41.29
  -6   6  23   79.84   40.90
  -6  -6  23   53.10   18.02
  -6   6  22   18.17   31.72
  -6  -6  22   30.39   24.11
  -6  -6  22   40.43   35.36
  -6   6  21  230.92  119.23
  -6   6  21  219.94  103.98
  -6  -6  21  164.64  106.03
  -6  -6  21  102.74   38.61
  -6   6  20   97.07   65.92
  -6   6  20  143.18   74.54
  -6  -6  20  171.75   54.59
   6   6 -19   77.39   33.88
  -6   6  19  121.47   95.24
  -6   6  19  108.86   53.87
  -6  -6  19   96.46   43.37
   6   6 -18  -14.29   38.74
  -6   6  18   72.54   47.98
  -6   6  18   -1.62   50.26
  -6  -6  18   40.72   33.24
   6   6 -17  477.55  116.64
  -6   6  17  548.03  127.43
  -6   6  17  489.71  131.10
  -6  -6  17  516.41  137.03
   6   6 -16   30.18   40.35
  -6   6  16   -7.85   41.55
  -6   6  16  -33.57   40.13
  -6  -6  16   33.83   18.60
   6   6 -15  245.57   70.67
  -6   6  15  196.66  103.64
  -6   6  15  278.07   59.82
  -6  -6  15  224.91   68.78
   6   6 -14  424.79  103.72
  -6   6  14  464.11  104.65
  -6   6  14  523.87   91.21
  -6  -6  14  528.03   70.58
   6   6 -13 2288.53   69.33
  -6   6  13 2257.65  203.40
  -6   6  13 2442.26  148.92
  -6  -6  13 2289.22  222.33
   6   6 -12   33.34   28.58
  -6   6  12   77.02   36.42
  -6   6  12   31.98   36.48
  -6  -6  12   28.96   22.93
   6   6 -11  152.29   35.27
  -6   6  11  109.97   31.87
  -6   6  11   75.37   25.41
   6   6 -10 4169.86  130.62
  -6   6  10 3851.80  126.13
   6   6 -10 3694.17  117.85
  -6   6  10 3927.85  124.42
   6   6  -9 2257.04  117.19
  -6   6   9 2191.40  140.43
   6   6  -9 2411.76   86.86
  -6   6   9 2091.66   60.73
   6   6  -8  739.62   39.74
   6   6  -8  825.85   54.71
  -6   6   8  977.60   58.28
  -6   6   8  775.81   45.47
  -6  -6   8  803.28   43.73
  -6  -6   8  812.01   37.05
   6   6  -7 3484.35  101.72
  -6   6   7 3795.59  115.26
  -6   6   7 4025.61  114.41
  -6  -6   7 3425.55   96.75
  -6  -6   7 3406.47   91.45
  -6   6   6  365.34   60.43
  -6   6   6  290.99   58.40
   6   6  -6  285.82   50.06
  -6  -6   6  356.58   75.48
  -6  -6   6  259.52   56.95
  -6  -6   6  323.44   23.11
  -6   6   5 2947.16  106.99
  -6   6   5 3183.43  105.20
  -6   6   5 2974.72  116.99
   6   6  -5 2946.14   94.85
  -6  -6   5 3001.54  100.78
  -6  -6   5 2949.25   89.66
  -6  -6   5 3100.28  101.51
   6  -6  -5 3107.74  100.00
  -6   6   4 1481.78   60.61
  -6   6   4 1616.13   65.25
   6   6  -4 1568.71   73.14
   6  -6  -4 1342.86   72.02
  -6  -6   4 1366.57   35.84
  -6  -6   4 1339.38   54.74
  -6  -6   4 1284.86   55.37
   6  -6  -4 1428.12   52.84
  -6   6   3  725.42  117.20
   6   6  -3  895.59   62.29
  -6   6   3  817.91   55.89
  -6  -6   3  757.67   23.29
  -6  -6   3  759.01   18.36
  -6  -6   3  822.85   32.11
   6  -6  -3  650.14   62.34
   6   6  -2 4773.08  119.30
  -6   6   2 4611.35  116.98
   6   6  -2 4701.15  107.41
  -6   6   2 4995.37  129.90
   6  -6  -2 4329.57  107.17
  -6  -6   2 4785.94  108.27
   6  -6  -2 4701.26  119.78
  -6  -6   2 4748.27  128.23
  -6   6   1 1674.91   64.08
   6   6  -1 1616.76   53.14
  -6   6   1 1811.02  104.78
   6   6  -1 1613.81   95.32
   6  -6  -1 1467.85   94.96
   6  -6  -1 1575.79   80.03
  -6  -6   1 1569.98   56.09
  -6  -6   1 1479.38  100.42
  -6   6   0  528.79   48.56
   6   6   0  617.67   47.76
  -6   6   0  549.11   43.69
   6   6   0  555.66  111.81
   6  -6   0  522.74   43.43
   6  -6   0  545.77   39.35
  -6  -6   0  504.48   24.52
  -6  -6   0  610.24   63.04
   6   6   114039.62  101.20
  -6   6  -113565.40  120.24
   6  -6   113067.36   83.06
  -6   6  -2   54.33   20.39
   6   6   2   64.03   28.81
  -6   6  -2   63.26   41.95
   6   6   2  -31.30   45.75
   6  -6   2   58.75   22.41
   6  -6   2  107.89   39.55
  -6  -6  -2   56.27   35.90
  -6  -6  -2   71.57   34.92
   6   6   3 1444.51  114.58
   6   6   3 1397.53   45.18
  -6   6  -3 1303.38   60.61
  -6   6  -3 1389.48   75.75
   6  -6   3 1152.69   84.20
  -6  -6  -3 1356.01   59.46
  -6  -6  -3 1486.02   80.31
   6   6   4 2083.34  133.78
   6   6   4 1864.74   92.50
  -6   6  -4 1838.11   54.85
  -6   6  -4 1482.72   66.95
   6  -6   4 1594.98   49.94
  -6  -6  -4 1784.73   57.38
   6   6   5 5024.62  151.02
  -6   6  -5 5398.49  127.03
  -6   6  -5 4829.20  120.07
  -6  -6  -5 4791.82  136.78
   6  -6   5 4821.91  114.87
  -6   6  -6   -3.38   43.24
  -6   6  -6   -4.76   37.42
   6   6   6  -35.27   47.19
  -6  -6  -6   12.94   15.06
  -6   6  -7  121.78   63.45
  -6   6  -7  178.06   52.33
   6   6   7  146.05   49.00
  -6  -6  -7  171.49   42.23
  -6   6  -8 1393.79   84.79
  -6   6  -8 1576.55   94.94
   6   6   8 1633.47   78.49
  -6  -6  -8 1521.71   67.91
  -6   6  -9  537.47  120.03
  -6   6  -9  582.01  142.51
   6   6   9  614.90  145.60
  -6  -6  -9  588.71  173.74
   6   6  10  124.77   50.48
  -6   6 -10  146.75   51.69
  -6  -6 -10   90.20   46.59
   6  -6  10  106.10   42.60
   6   6  11 1580.76  187.66
  -6   6 -11 1737.21  103.39
  -6  -6 -11 1702.40   97.20
   6  -6  11 1858.95  113.51
   6   6  12 1165.70  251.76
  -6   6 -12 1277.33   86.82
  -6  -6 -12 1401.10   85.71
   6  -6  12 1250.60  145.05
   6   6  13  123.08   75.05
  -6   6 -13  142.39   79.60
  -6  -6 -13  160.56   51.96
   6  -6  13  125.80   44.77
   6   6  14  809.53  261.16
  -6   6 -14  751.89   95.84
  -6  -6 -14  866.39  170.01
   6  -6  14 1113.15   91.70
   6   6  15  538.77  145.58
  -6   6 -15  651.95  182.72
  -6  -6 -15  563.51   75.05
   6  -6  15  585.91  124.93
   6   6  16  436.52  141.91
  -6   6 -16  438.35  108.20
  -6  -6 -16  502.46   92.31
   6  -6  16  296.90  112.61
   6   6  17  190.38   75.61
  -6   6 -17  252.78   84.80
  -6  -6 -17  191.49   94.98
   6  -6  17  159.99   37.94
   6   6  18  705.71  272.76
  -6   6 -18  614.32  172.88
  -6  -6 -18  750.59  190.89
   6  -6  18  445.81  143.05
   6   6  19   75.58   49.71
  -6   6 -19  113.51   54.80
  -6  -6 -19   88.78   50.13
   6  -6  19  124.09   43.62
   6   6  20  111.66   84.25
  -6   6 -20  155.16   53.61
  -6  -6 -20  114.80   64.98
   6  -6  20  194.74   64.83
  -6   6 -21  118.71   63.04
   6  -6  21   96.19   47.91
  -6   8  22   39.66   40.02
  -6  -8  22   47.51   37.72
  -6  -8  22   51.27   45.87
  -6   8  21   -1.91   51.62
  -6   8  21   32.51   63.77
  -6  -8  21   17.21   24.57
  -6  -8  21  -31.99   39.48
  -6   8  20  285.95   83.18
  -6   8  20  176.10   89.23
  -6  -8  20  200.43   81.67
  -6  -8  20  275.51   65.17
  -6   8  19   25.96   42.82
  -6   8  19   64.94   31.94
  -6  -8  19   39.14   41.51
   6   8 -18   74.14   29.49
  -6   8  18   58.54   49.17
  -6   8  18   -4.81   52.38
  -6  -8  18   31.58   19.97
   6   8 -17   35.67   20.23
  -6   8  17   47.50   75.47
  -6   8  17   41.59   46.72
  -6  -8  17   -3.14   36.38
   6   8 -16  201.41   59.63
  -6   8  16  203.08   84.15
  -6   8  16   87.96   40.16
  -6  -8  16  214.02   50.50
  -6   8  15   99.89   58.41
  -6   8  15  119.36   36.89
  -6  -8  15  147.82   40.94
   6   8 -14   67.29   26.37
  -6   8  14   86.80   58.09
  -6   8  14  125.35   75.32
  -6  -8  14  133.71   48.99
   6   8 -13  185.23   39.29
  -6   8  13  317.00  113.23
  -6   8  13  191.18   76.79
  -6  -8  13  181.99   52.40
   6   8 -12  824.13   43.82
  -6   8  12 1038.86   75.00
   6   8 -12  827.66  155.16
  -6   8  12 1227.81  170.47
   6   8 -11 1278.39   81.96
  -6   8  11 1240.71   95.05
   6   8 -11 1139.66   57.32
   6   8 -10  258.79   69.86
  -6   8  10  299.15   73.75
   6   8 -10  130.07   36.93
  -6   8  10  318.27   82.00
   6   8  -9  419.43   79.28
   6   8  -9  457.93   92.69
  -6   8   9  456.96  130.22
  -6   8   9  495.65  104.92
  -6  -8   9  347.58   30.54
   6   8  -8 4513.76  137.27
  -6   8   8 4898.55  211.39
  -6   8   8 5909.87  295.29
  -6  -8   8 5127.62  157.73
  -6   8   7   51.75   29.86
  -6   8   7   51.02   27.98
   6   8  -7   21.39   21.32
  -6  -8   7   21.27    8.83
  -6  -8   7   63.95   21.55
  -6   8   6  348.10   87.60
  -6   8   6  277.45   74.82
   6   8  -6  298.76   57.34
  -6  -8   6  276.04   43.97
  -6  -8   6  319.63   52.09
  -6   8   5 1736.56  111.73
   6   8  -5 1841.83   75.25
  -6   8   5 1781.89  151.92
  -6  -8   5 1669.45   61.87
  -6  -8   5 1836.84   60.61
  -6  -8   5 1828.91   52.03
   6   8  -4 2673.32  171.94
  -6   8   4 2761.88  122.32
  -6   8   4 2817.78  132.86
  -6  -8   4 2434.11   93.32
  -6  -8   4 2496.23   69.16
  -6   8   3   54.19   39.99
  -6   8   3   46.86   24.83
   6   8  -3  106.65   31.94
   6  -8  -3   61.41   16.84
  -6  -8   3   47.72   24.42
  -6   8   2  978.96   54.10
   6   8  -2 1059.04   62.22
  -6   8   2 1041.69   68.89
   6  -8  -2  930.75   36.67
  -6  -8   2 1113.71   77.18
   6   8  -1 2926.74  119.38
   6   8  -1 2746.19   80.25
  -6   8   1 2797.83   95.81
  -6   8   1 2808.38  122.64
   6  -8  -1 2561.52   79.27
  -6  -8   1 2604.59   73.80
  -6  -8   1 2638.44  106.33
  -6   8   016167.17  243.93
   6   8   016035.59  209.71
   6   8   016853.96  282.67
  -6   8   016175.92  296.60
  -6  -8   015855.24  212.90
  -6  -8   015689.26  218.49
   6   8   1 5265.92  191.10
   6   8   1 4851.73  116.33
  -6   8  -1 5011.09  125.97
  -6   8  -1 4891.26  138.44
   6  -8   1 4537.29  111.77
  -6  -8  -1 4774.40  115.74
   6   8   2 1048.81   81.49
   6   8   2 1031.21   66.82
  -6   8  -2 1097.37   99.41
  -6   8  -2 1046.17   75.90
   6  -8   2 1036.97   40.70
  -6  -8  -2  953.47   78.34
   6   8   3  603.48  158.36
   6   8   3  608.09   30.79
  -6   8  -3  538.84   58.08
  -6   8  -3  422.87  146.86
   6  -8   3  423.81   59.47
  -6  -8  -3  434.33   38.31
   6   8   4 1130.05  109.23
   6   8   4 1177.01   63.22
  -6   8  -4  933.74   80.63
  -6   8  -4  974.95   89.79
   6  -8   4  974.16   38.69
  -6  -8  -4 1070.05   40.56
   6   8   5   50.13   34.01
  -6   8  -5   74.05   30.55
  -6   8  -5   37.96   34.38
  -6  -8  -5   61.26   21.40
   6  -8   5   96.60   21.26
  -6   8  -6   29.49   39.55
  -6   8  -6   40.96   39.22
   6   8   6   19.13   24.19
  -6  -8  -6    1.14   14.72
  -6   8  -7   -7.11   47.96
  -6   8  -7  114.24   47.26
   6   8   7  106.03   60.43
  -6  -8  -7   86.63   39.76
  -6   8  -8 1735.34  139.96
  -6   8  -8 1852.68   59.07
   6   8   8 1910.25  134.24
  -6  -8  -8 1886.61   71.93
  -6   8  -9  114.95   47.44
  -6   8  -9  122.85   86.46
   6   8   9  254.60   54.16
  -6  -8  -9  173.79   49.88
  -6   8 -10  -32.74   50.57
  -6   8 -10   13.16   22.04
   6   8  10   -0.95   29.34
  -6  -8 -10   87.12   64.40
  -6   8 -11  788.30  195.69
  -6   8 -11  963.98  124.36
   6   8  11  944.07  232.57
  -6  -8 -11  852.71   88.70
   6   8  12  678.89  183.11
  -6   8 -12  590.10  110.68
  -6  -8 -12  583.04   91.87
   6  -8  12  590.68  144.52
   6   8  13 1818.41  160.53
  -6   8 -13 1922.89  124.72
  -6  -8 -13 1707.19  108.52
   6  -8  13 1462.74  318.84
   6   8  14  292.23   76.76
  -6   8 -14  191.17   44.73
  -6  -8 -14  289.34   82.65
   6  -8  14   66.46   38.91
   6   8  15  373.94   94.21
  -6   8 -15  344.76  100.87
  -6  -8 -15  305.36   72.21
   6  -8  15  336.55   71.74
   6   8  16  130.97   60.35
  -6   8 -16  144.27   70.84
  -6  -8 -16  208.40   83.25
   6  -8  16   -2.22   55.97
   6   8  17   27.03   42.05
  -6   8 -17  101.35   56.92
  -6  -8 -17  116.66   64.85
   6  -8  17   37.42   33.90
   6   8  18  711.44  275.36
  -6   8 -18  706.74   83.67
  -6  -8 -18  743.15  166.88
   6  -8  18  577.62  153.91
   6   8  19   63.80   50.62
  -6   8 -19   43.18   25.00
  -6  -8 -19    8.11   35.75
   6  -8  19  -11.34   46.81
  -6   8 -20   81.88   45.22
   6   8  20   31.60   54.33
   6  -8  20   40.34   34.00
  -6   8 -21   90.50   29.30
  -6  10  22    9.18   20.61
  -6  10  21  261.48   80.50
  -6 -10  21  136.51   55.78
  -6  10  20   90.19   66.27
  -6  10  20  220.44   98.48
  -6 -10  20   62.77   28.94
  -6  10  19  117.36   69.37
  -6  10  19   44.60   24.64
  -6 -10  19   34.83   31.21
  -6  10  18   87.21   70.10
  -6  10  18   99.98   54.40
  -6 -10  18   28.45   28.63
  -6 -10  18  -10.29   38.60
  -6  10  17  -36.78   58.60
  -6  10  17   36.17   59.91
  -6 -10  17   -9.95   33.27
   6  10 -16  332.82   63.05
  -6  10  16  366.48  172.66
  -6  10  16  492.29   83.14
  -6 -10  16  271.51   85.84
   6  10 -15  160.33   29.13
  -6  10  15   95.42   45.52
  -6  10  15   90.97   55.21
  -6 -10  15  130.88   37.25
   6  10 -14  873.80   94.40
  -6  10  14  786.58  209.34
  -6  10  14  840.67  205.90
  -6 -10  14  939.76   91.44
   6  10 -13  274.58   67.45
  -6  10  13  237.10   89.97
   6  10 -13  326.66  123.15
  -6  10  13  428.45   95.23
   6  10 -12 2328.44   75.27
  -6  10  12 2527.79   86.18
   6  10 -12 2427.37   68.60
  -6  10  12 2838.04  244.36
   6  10 -11  925.28   34.77
  -6  10  11  977.24  123.21
   6  10 -11  838.73  199.02
  -6  10  11  783.83   75.83
  -6  10  10   38.24   37.81
   6  10 -10   44.61   33.18
  -6  10  10   76.51   78.49
  -6  10   9   82.22   35.32
  -6  10   9  -27.78   43.17
   6  10  -9   25.78   42.10
  -6 -10   9   32.13   18.57
  -6 -10   9   37.23   14.55
  -6  10   8   52.80   26.90
  -6  10   8   52.10   27.88
   6  10  -8   65.88   34.96
  -6 -10   8   61.61   15.44
  -6 -10   8   48.41   21.34
  -6  10   7 1156.50   62.07
  -6  10   7  992.97   58.62
   6  10  -7 1174.51   79.41
  -6 -10   7 1145.70   25.92
  -6 -10   7 1073.45   51.14
  -6  10   6 5126.31  153.08
   6  10  -6 5423.64  167.25
  -6  10   6 5662.06  222.92
  -6 -10   6 4923.83  133.52
  -6 -10   6 5360.83  142.10
  -6  10   5  873.10  200.48
   6  10  -5  760.59  158.30
  -6  10   5  733.88   77.03
  -6  10   4  727.74  115.55
   6  10  -4  782.38   54.91
  -6  10   4  908.69   55.99
  -6  10   3   43.27   35.60
  -6  10   3   29.54   40.64
   6  10  -3  116.67   75.11
   6 -10  -3   45.79   17.14
  -6  10   2 2476.71   78.35
  -6  10   2 2367.86  102.45
   6  10  -2 2376.55  158.80
   6 -10  -2 2422.40   71.19
   6  10  -1  934.85    9.59
  -6  10   1  898.70   39.24
   6  10  -1 1051.27  207.43
  -6  10   1  984.72   64.79
   6 -10  -1  809.28   61.81
   6  10   0  908.93   28.73
  -6  10   0  870.75   43.83
   6  10   0  959.40   60.62
  -6  10   0  946.80  190.32
   6 -10   0  799.40   35.62
   6  10   1  359.03   86.54
   6  10   1  357.39   41.26
  -6  10  -1  289.15   84.79
  -6  10  -1  291.75   42.91
   6 -10   1  214.59   52.84
  -6 -10  -1  342.12   42.96
   6  10   2  178.69   78.52
   6  10   2   89.22   20.27
  -6  10  -2   72.08   31.25
  -6  10  -2   58.57   53.04
   6 -10   2   58.25   27.55
  -6 -10  -2   84.61   25.04
   6  10   3  327.26   88.58
   6  10   3  267.49   61.92
  -6  10  -3  276.58   70.21
  -6  10  -3  343.04  104.42
   6 -10   3  205.36   49.14
  -6 -10  -3  248.23   62.17
   6  10   4  238.43   71.75
   6  10   4  206.54   42.69
  -6  10  -4  260.45   78.51
  -6  10  -4  219.52   61.56
   6 -10   4  146.15   39.59
  -6 -10  -4  251.69   58.29
   6  10   5   33.27   30.21
  -6  10  -5   34.19   21.72
  -6  10  -5    9.95   38.24
  -6 -10  -5   -7.48   23.86
   6 -10   5   25.90    9.38
  -6  10  -6   -1.83   45.94
  -6  10  -6   35.86   15.25
   6  10   6   46.54   50.35
  -6 -10  -6   18.65   12.34
  -6  10  -7  -28.72   45.99
  -6  10  -7   58.16   32.11
   6  10   7   36.72   28.73
  -6 -10  -7   -2.57   42.09
  -6  10  -8  604.38  202.83
  -6  10  -8  656.40   86.46
   6  10   8  613.38  145.04
  -6 -10  -8  692.87  137.84
  -6  10  -9  369.62   65.40
  -6  10  -9  252.39   84.14
   6  10   9  387.83   75.69
  -6 -10  -9  462.74  140.94
  -6  10 -10   97.57   28.31
  -6  10 -10   98.97   31.83
   6  10  10   60.34   77.53
  -6 -10 -10  -38.37   52.20
  -6  10 -11   22.54   48.98
  -6  10 -11   37.76   38.81
   6  10  11   30.93   66.82
  -6 -10 -11   76.56   44.42
  -6  10 -12  177.84   48.88
  -6  10 -12  219.98   59.48
   6  10  12  198.55   97.59
  -6 -10 -12  185.01   48.08
   6  10  13 2189.00  151.05
  -6  10 -13 1913.57  118.61
  -6 -10 -13 1810.76  110.89
   6 -10  13 1565.94   90.44
   6  10  14  -73.80   62.73
  -6  10 -14   87.08   35.47
  -6 -10 -14   83.35   40.19
   6 -10  14   -2.97   56.37
   6  10  15  146.92   77.69
  -6  10 -15   70.74   33.80
  -6 -10 -15  300.02   48.79
   6 -10  15  235.64   65.37
   6  10  16  170.21   65.32
  -6  10 -16  210.21   49.25
  -6 -10 -16  162.51   68.31
   6 -10  16  130.54   40.74
   6  10  17    9.20   39.29
  -6  10 -17   86.66   36.33
  -6 -10 -17   14.65   38.52
   6 -10  17   91.82   40.03
   6  10  18  110.64   77.22
  -6  10 -18  139.73   44.69
  -6 -10 -18   87.32   77.21
   6 -10  18   78.50   71.24
   6  10  19  103.77   46.05
  -6  10 -19  -14.42   34.80
  -6 -10 -19  -67.20   69.70
   6 -10  19   34.42   60.87
  -6  10 -20   91.59   32.86
  -6  12  21   55.27   69.66
  -6  12  20   91.80   69.44
  -6  12  20  118.77   50.57
  -6 -12  20  138.78   59.99
  -6  12  19  510.78  131.87
  -6  12  19  333.66  171.05
  -6 -12  19  253.96  101.11
  -6  12  18  378.88  149.62
  -6  12  18  206.66   65.83
  -6 -12  18  276.08  104.66
  -6  12  17 1565.21  143.82
  -6  12  17 1439.73  131.73
  -6 -12  17 1289.75  200.21
  -6  12  16  624.37  164.56
  -6  12  16  568.89  200.32
  -6 -12  16  411.38  157.53
  -6  12  15   46.45   53.62
  -6  12  15   60.54   64.83
  -6 -12  15   12.32   24.47
  -6  12  14  384.24  141.67
  -6  12  14  387.11   87.12
   6  12 -14  354.41  145.58
  -6 -12  14  243.86   67.29
  -6  12  13  101.08   57.12
  -6  12  13  110.28   46.70
   6  12 -13   76.26   32.67
  -6 -12  13   32.48   22.05
  -6  12  12  465.57  141.45
  -6  12  12  486.25  114.65
   6  12 -12  476.21  100.86
  -6 -12  12  285.56   75.05
  -6  12  11  709.24  184.32
  -6  12  11  856.10   81.97
   6  12 -11  627.33  139.77
  -6 -12  11  599.14   97.17
  -6  12  10 4223.67   95.67
  -6  12  10 4443.71  106.86
   6  12 -10 4251.84   90.50
  -6 -12  10 3857.03   62.44
  -6  12   9  209.58   35.77
  -6  12   9  167.42   85.90
   6  12  -9  287.42   75.09
  -6 -12   9  143.62   33.34
  -6 -12   9  240.60   30.93
  -6  12   8 3479.59  185.97
  -6  12   8 2926.65  124.39
   6  12  -8 3135.21   87.22
  -6 -12   8 2807.06   81.43
  -6 -12   8 2680.15   41.90
  -6  12   7 2095.14  146.82
   6  12  -7 2238.63   91.51
  -6  12   7 2267.81  115.84
  -6 -12   7 2044.57   55.20
  -6 -12   7 2138.53   57.32
  -6  12   6   37.94   25.31
   6  12  -6   33.43   33.42
  -6  12   6  -40.10   63.03
  -6  12   5  727.77   62.72
   6  12  -5  712.15  178.48
  -6  12   5  815.61  189.79
  -6  12   4   36.52   27.78
   6  12  -4  -17.91   44.38
  -6  12   4   77.14   71.25
  -6  12   3  445.15  105.08
   6  12  -3  336.98   97.44
  -6  12   3  446.45  109.13
  -6  12   2 3701.89  119.84
  -6  12   2 3949.63  136.86
   6  12  -2 3686.33  124.67
   6 -12  -2 3410.40  101.24
  -6  12   1 1651.62   48.82
   6  12  -1 1530.95   70.22
  -6  12   1 1579.93   88.08
   6 -12  -1 1487.29   37.76
   6  12   0 1709.77   21.62
  -6  12   0 1764.69   48.91
   6  12   0 1655.75   26.49
   6  12   0 1849.90  159.74
  -6  12   0 1897.93  107.68
   6 -12   0 1630.86   36.47
   6  12   1  223.15   47.30
  -6  12  -1  283.35   52.62
  -6  12  -1  242.10   54.47
   6  12   1  219.24   42.51
   6  12   1  156.48   64.17
   6 -12   1  190.12   49.76
   6  12   2  829.82   27.39
  -6  12  -2  964.55   96.53
   6  12   2  989.19   65.00
  -6  12  -2  912.96   73.76
   6 -12   2  879.80   41.32
   6  12   3 3697.43  110.03
   6  12   3 4062.83   71.07
  -6  12  -3 4257.92   84.44
  -6  12  -3 3765.46   97.31
   6 -12   3 3776.24   81.48
  -6 -12  -3 3749.32   65.01
   6  12   4  537.45  142.95
  -6  12  -4  426.98   49.03
  -6  12  -4  490.66  108.48
  -6 -12  -4  415.75   86.74
   6 -12   4  279.42   84.28
   6  12   5 1287.58  194.15
  -6  12  -5 1320.96   48.92
  -6  12  -5 1295.84  119.29
  -6 -12  -5 1174.92   63.49
   6 -12   5 1212.61   34.27
  -6  12  -6  126.29   45.60
  -6  12  -6  105.54   54.06
   6  12   6  125.76   59.35
  -6 -12  -6  229.06   47.24
  -6  12  -7  217.59   64.87
  -6  12  -7  208.46   41.58
   6  12   7  322.92   68.50
  -6 -12  -7  259.74   54.87
  -6  12  -8 1688.45  137.68
  -6  12  -8 1664.80   47.06
   6  12   8 1949.98  125.56
  -6 -12  -8 1623.39   82.23
  -6  12  -9  128.45   53.94
  -6  12  -9   97.90   27.27
   6  12   9  126.60   77.46
  -6 -12  -9  129.13   61.53
  -6  12 -10  763.36  137.69
  -6  12 -10  657.18  137.12
   6  12  10  681.25  226.45
  -6 -12 -10  696.68  129.31
  -6  12 -11  534.97  159.01
  -6  12 -11  540.75  139.32
   6  12  11  749.80  183.47
  -6 -12 -11  610.82   69.92
  -6  12 -12  250.68   76.85
  -6  12 -12  292.57   81.46
   6  12  12  209.04   75.41
  -6 -12 -12  370.52   68.67
  -6  12 -13  328.58   88.72
  -6  12 -13  470.06   85.07
   6  12  13  394.80  117.99
  -6 -12 -13  382.13   99.42
   6  12  14  408.20   80.90
  -6  12 -14  483.30   86.23
  -6 -12 -14  343.82  124.51
   6 -12  14  330.08   94.21
   6  12  15   30.93   72.47
  -6 -12 -15   53.25   65.89
   6 -12  15  236.08   89.81
   6  12  16   93.03   47.35
  -6  12 -16   33.85   17.34
  -6 -12 -16   18.68   59.96
   6 -12  16   91.04   61.00
   6  12  17  113.32   44.48
  -6  12 -17   88.97   32.84
  -6 -12 -17  145.89   82.28
   6 -12  17  250.02   66.34
   6  12  18   77.01   42.46
  -6 -12 -18   75.74   52.13
   6 -12  18   94.73   30.07
  -6 -12 -19  105.22   76.08
   6 -12  19  102.54   52.23
  -6  14  20  145.27   49.02
  -6  14  19  874.76   64.23
  -6  14  19  701.05  193.58
  -6 -14  19  812.09  106.26
  -6  14  18   30.98   32.28
  -6  14  18  -63.61   65.48
  -6 -14  18   -0.22   27.10
  -6  14  17  297.95  144.03
  -6  14  17  401.66  142.32
  -6 -14  17  343.21   70.17
  -6  14  16 1178.25  101.17
  -6  14  16 1342.98  128.33
  -6 -14  16 1166.77  176.67
  -6  14  15   36.38   50.10
   6  14 -15   79.32   27.99
  -6  14  15   77.21   47.65
  -6  14  14  160.67   57.77
   6  14 -14  233.72   68.26
  -6  14  14  188.01  118.22
  -6  14  13  134.04   56.45
   6  14 -13  172.83   55.93
  -6  14  13  189.76   89.14
  -6  14  12  189.79   80.81
   6  14 -12  165.08   36.58
  -6  14  12  112.27   51.20
  -6  14  11   65.99   36.85
   6  14 -11   55.81   31.42
  -6  14  11   93.64   54.62
  -6  14  10  721.36  174.14
   6  14 -10  497.93  114.78
  -6  14  10  612.55  120.63
  -6  14   9  385.61  106.33
   6  14  -9  323.91   83.54
  -6  14   9  607.17  129.21
  -6  14   8   13.55   28.55
   6  14  -8   24.75   38.56
  -6  14   8   75.56   35.79
  -6  14   7  204.51   39.38
   6  14  -7  151.02   74.42
  -6  14   7  202.69   90.64
  -6  14   6 1518.05   97.38
   6  14  -6 1573.82   80.38
  -6  14   6 1533.74   81.31
  -6  14   5   23.87   16.83
   6  14  -5    5.80   26.44
  -6  14   5  107.95   51.22
  -6  14   4   64.35   26.78
   6  14  -4   72.49   29.02
  -6  14   4   17.01   50.64
  -6  14   3   77.81   25.75
   6  14  -3   91.36   28.61
  -6  14   3   93.75   61.11
  -6  14   2  539.46  114.82
   6  14  -2  567.47  149.96
  -6  14   2  621.02  116.23
  -6  14   1   31.79   21.06
   6  14  -1   66.96   48.01
  -6  14   1   24.04   31.55
   6 -14  -1    7.70   14.22
   6  14   0   18.59    9.76
  -6  14   0   55.99   26.41
   6  14   0   -9.25   43.12
  -6  14   0   93.52   54.81
   6 -14   0   21.96   15.05
   6  14   1   55.73   12.30
  -6  14  -1   94.63   26.00
   6  14   1  101.57   24.29
   6  14   1   68.96   32.58
  -6  14  -1  116.59   37.93
   6 -14   1   65.59   17.87
   6  14   2  569.88   29.77
  -6  14  -2  659.85   61.71
  -6  14  -2  560.15  160.92
   6  14   2  607.23   44.62
   6  14   2  826.07   70.92
   6 -14   2  406.21   56.65
   6  14   3  309.53   74.32
  -6  14  -3  434.75   65.37
  -6  14  -3  427.75   89.17
   6  14   3  457.10   86.25
   6  14   3  516.27  122.86
   6 -14   3  214.22   63.11
  -6  14  -4  134.85   48.06
   6  14   4   65.40   26.61
  -6  14  -4   74.72   35.11
   6  14   4   52.60   37.06
  -6  14  -5   20.51   13.83
  -6  14  -5  -60.73   53.10
   6  14   5  -63.74   57.15
  -6  14  -6 2522.39  116.48
  -6  14  -6 2400.86   95.14
   6  14   6 2523.00  104.77
  -6 -14  -6 2365.21   59.71
  -6  14  -7    8.62   36.99
  -6  14  -7   29.56   20.77
   6  14   7    0.99   49.46
  -6 -14  -7   -0.40   36.30
  -6  14  -8   81.84   58.95
  -6  14  -8   42.03   18.63
   6  14   8   87.93   44.07
  -6 -14  -8   26.83   45.35
  -6  14  -9   58.54   41.89
  -6  14  -9   40.16   24.88
   6  14   9  115.29   56.36
  -6 -14  -9   59.78   26.25
  -6  14 -10 1281.30   94.47
  -6  14 -10 1450.16   68.77
   6  14  10 1260.98  117.29
  -6 -14 -10 1367.91   65.82
  -6  14 -11   67.38   50.69
  -6  14 -11    8.96   27.38
   6  14  11  -99.66   66.40
  -6 -14 -11  108.27   41.18
  -6  14 -12   20.38   36.19
  -6  14 -12   22.20   16.59
   6  14  12  -99.97   73.03
  -6 -14 -12   75.71   18.20
  -6  14 -13  592.53  190.52
  -6  14 -13  881.71  107.39
   6  14  13  782.29  268.34
  -6 -14 -13  439.03  224.48
   6  14  14  206.09   97.52
  -6  14 -14   74.06   52.43
  -6 -14 -14  113.31   44.69
   6  14  15  122.53   60.28
  -6 -14 -15  110.53   50.82
   6 -14  15  141.74   79.69
   6  14  16  303.05   68.47
  -6 -14 -16  211.28   56.91
   6 -14  16  114.34   38.77
   6  14  17   80.58   61.74
  -6 -14 -17   42.55   33.87
   6 -14  17   52.26   65.14
  -6 -14 -18  142.17   61.60
   6 -14  18  120.73   51.29
  -6  16  18   67.15   50.31
  -6  16  18  -10.19   57.29
  -6 -16  18   90.43   37.53
  -6  16  17   89.27   59.56
  -6  16  17  143.53   68.66
  -6 -16  17  117.08   34.16
  -6  16  16   80.35   33.01
   6  16 -16   70.29   36.55
  -6  16  16   78.44   45.74
  -6  16  15   55.56   26.30
   6  16 -15   32.16   18.13
  -6  16  15   62.62   28.43
  -6  16  14   71.14   36.58
   6  16 -14   74.21   33.88
  -6  16  14   63.58   32.89
  -6  16  13  355.23   69.53
   6  16 -13  356.15   67.74
  -6  16  13  316.76   75.26
  -6  16  12 1038.30  121.39
   6  16 -12 1111.56   68.10
  -6  16  12 1151.44   99.10
  -6  16  11  406.43  141.40
  -6  16  11  393.87   69.97
  -6  16  10  117.20   53.37
   6  16 -10  109.55   35.47
  -6  16  10  165.84  113.44
  -6  16   9  490.26  133.30
   6  16  -9  551.30  104.63
  -6  16   9  558.19  159.90
  -6  16   8  548.03  121.51
   6  16  -8  699.37  170.35
  -6  16   8  676.62  100.20
  -6  16   7 4499.90  115.44
   6  16  -7 5272.52  144.57
  -6  16   7 4819.46  275.42
  -6  16   6  168.14   43.82
   6  16  -6  122.48   61.30
  -6  16   6  140.18   53.15
  -6  16   5  634.49   84.93
   6  16  -5  688.37  173.76
  -6  16   5  793.24  202.48
  -6  16   4   -1.75   14.58
   6  16  -4   66.97   61.85
  -6  16   4  -75.42   59.41
   6  16  -3   74.90   55.90
  -6  16   3   98.64   55.78
  -6  16   2 4791.47   60.77
   6  16  -2 4982.88  103.97
  -6  16   2 4746.02  155.19
  -6  16   1   57.83   28.51
  -6  16   1   66.79   54.91
   6  16  -1  106.58   86.72
  -6  16   0 2540.16   57.07
  -6  16   0 2322.69  136.68
   6  16   0 2433.63  130.44
  -6  16  -1  321.40   52.56
   6  16   1  257.04   45.68
  -6  16  -1  484.42  169.82
   6  16   1  346.18   93.25
  -6  16  -2 1061.50   36.04
   6  16   2 1029.08   50.27
  -6  16  -2 1056.85   68.09
   6  16   2 1128.97   82.80
  -6  16  -3 2127.17  106.35
   6  16   3 1804.88   39.65
  -6  16  -3 2087.71  203.10
   6  16   3 1859.20  183.32
  -6  16  -4   -0.28   15.17
   6  16   4   60.32   25.55
  -6  16  -4   71.67   31.16
   6  16   4   11.24   51.01
  -6  16  -5   -9.97   16.63
   6  16   5   23.62   19.21
  -6  16  -5   52.93   38.88
   6  16   5   66.30   54.68
  -6  16  -6  185.15   55.35
   6  16   6  242.88   77.35
  -6  16  -6  226.24   95.24
   6  16   6  238.80   73.05
  -6  16  -7  359.72   89.14
   6  16   7  423.66  100.39
  -6  16  -7  361.36  100.30
   6  16   7  495.69  123.86
   6  16   8  347.75   78.71
  -6  16  -8  409.51   88.79
   6  16   8  345.39  105.93
   6  16   9  116.56   43.83
  -6  16  -9   58.24   30.70
   6  16   9    0.07   32.63
   6  16  10  105.97   62.19
  -6  16 -10  241.78   61.88
   6  16  10  178.99   81.84
   6  16  11  925.19   70.19
  -6  16 -11 1033.48  241.66
   6  16  11  869.38  307.01
   6  16  12 1169.58  128.05
  -6  16 -12  942.08  233.31
   6  16  12 1106.19  330.05
   6  16  13  359.39  164.47
  -6  16 -13  320.66   82.14
   6  16  13  437.05  110.00
   6  16  14   44.24   34.30
  -6  16 -14  -42.65   59.90
   6  16  14  -45.87   59.54
   6  16  15  115.43   44.65
  -6  16 -15  164.15   30.33
   6  16  15   73.16   34.29
   6  16  16   28.13   28.94
   6  16  16   85.21   54.16
   6 -16  16   42.81   48.77
   6  16  17   64.32   28.92
  -6  18  17   41.04   28.66
   6  18 -17   47.18   30.24
  -6  18  16   72.50   73.79
   6  18 -16  161.86   56.46
  -6  18  16  185.81   96.54
  -6  18  15   70.89   46.45
   6  18 -15   35.68   34.68
  -6  18  15  -24.16   67.78
  -6  18  14  480.91  134.16
   6  18 -14  474.86   74.71
  -6  18  14  554.18  132.23
  -6  18  13  487.02  165.12
   6  18 -13  723.68  168.55
  -6  18  13  416.90  246.20
  -6  18  12   43.22   25.96
   6  18 -12   33.63   31.36
  -6  18  12  -28.80   62.32
  -6  18  11   35.93   40.06
   6  18 -11   27.52   45.75
  -6  18  11   64.65   45.45
  -6  18  10  -59.39   36.05
   6  18 -10   29.58   29.93
  -6  18  10  -48.71   55.42
  -6  18   9  340.60  132.94
   6  18  -9  395.86   97.25
  -6  18   9  326.49  118.36
  -6  18   8 1157.63   81.51
   6  18  -8 1086.61  201.57
  -6  18   8 1346.70  137.78
  -6  18   7  614.95  144.14
   6  18  -7  797.37  124.53
  -6  18   7  728.68  138.47
  -6  18   6 1245.99   82.28
   6  18  -6 1304.20  102.17
  -6  18   6 1321.79  298.39
  -6  18   5    0.26   15.62
   6  18  -5  -51.70   49.87
  -6  18   5  114.53   65.57
  -6  18   4   51.49   28.50
   6  18  -4   47.61   21.77
  -6  18   4   -7.91   70.31
  -6  18   3   25.44   19.88
   6  18  -3   28.03   28.92
  -6  18   3   14.47   54.03
  -6  18   2  289.50   63.52
   6  18  -2  386.24   63.11
  -6  18   2  179.74   66.27
  -6  18   1  120.33   27.46
  -6  18   1  108.50   53.26
   6  18  -1   73.57   28.64
  -6  18   0 1525.54   45.25
  -6  18   0 1236.51  177.13
   6  18   0 1601.20  123.61
  -6  18  -1   78.69   45.56
   6  18   1   57.88   38.41
  -6  18  -2    1.38   31.49
   6  18   2   -7.38   51.69
  -6  18  -3  102.13   63.37
   6  18   3   16.16   21.64
  -6  18  -4   71.86   38.36
   6  18   4   25.87   64.58
  -6  18  -5  489.69  144.90
   6  18   5  474.45  131.73
   6  18   6  149.25   56.47
  -6  18  -6  169.62   79.64
   6  18   6  119.56   74.60
   6  18   7   38.24   17.32
  -6  18  -7  126.49   74.90
   6  18   7  118.44   75.92
   6  18   8   45.47   38.74
  -6  18  -8   92.03   55.97
   6  18   8   35.85   55.12
   6  18   9   28.14   21.12
  -6  18  -9   52.47   40.89
   6  18   9   17.34   57.75
   6  18  10  102.52   31.93
  -6  18 -10   95.59   44.76
   6  18  10   99.55   48.39
   6  18  11   34.65   34.42
  -6  18 -11   98.97   29.53
   6  18  11  150.18   80.24
   6  18  12 1387.62   73.74
  -6  18 -12 1179.00  113.99
   6  18  12 1339.21  288.90
   6  18  13   -7.95   32.18
  -6  18 -13  -13.14   57.08
   6  18  13  102.06   54.38
   6  18  14  161.98   49.09
  -6  18 -14   94.08   49.16
   6  18  14   10.07   45.85
   6  18  15   37.43   37.97
  -6  18 -15   74.50   71.22
   6  18  16  340.59  167.68
  -6  20  16    6.44   26.54
   6  20 -16   34.21   35.17
  -6  20  15   30.87   35.50
   6  20 -15   90.93   33.96
  -6  20  14  532.76   62.90
   6  20 -14  524.44   89.03
  -6  20  14  266.67  139.05
  -6  20  13   59.08   41.74
   6  20 -13  263.95   54.00
  -6  20  13  264.60   98.36
  -6  20  12   47.77   32.16
   6  20 -12   57.53   35.04
  -6  20  12  -30.12   69.50
  -6  20  11   24.87   20.29
   6  20 -11   24.18   35.30
  -6  20  11   14.43   43.72
  -6  20  10   59.38   36.58
   6  20 -10   28.47   48.84
  -6  20  10   41.62   27.57
  -6  20   9   39.83   24.46
   6  20  -9  -23.39   52.95
  -6  20   9  115.64  127.19
  -6  20   8   38.65   18.94
   6  20  -8   68.10   31.14
  -6  20   8   44.91   41.20
   6  20  -7   72.10   50.15
  -6  20   7   -8.02   61.27
   6  20  -6  296.94   74.11
  -6  20   6  372.77  103.50
   6  20  -5   89.14   49.35
  -6  20   5  140.76   50.64
   6  20  -4   94.10   45.41
  -6  20   4  123.40   58.83
   6  20  -3   -7.76   58.27
  -6  20   3   65.41   51.37
   6  20  -2  100.59   66.15
  -6  20   2  110.87   90.62
  -6  20   1  343.85  114.75
   6  20  -1  333.37  101.40
  -6  20   0  163.16   83.25
   6  20   0  160.44   71.78
  -6  20  -1  119.89   53.99
   6  20   1  248.47   85.34
  -6  20  -2  110.37   62.89
   6  20   2   78.13   61.68
  -6  20  -3  330.04  115.86
   6  20   3  423.20  114.44
  -6  20  -4   58.16   36.55
   6  20   4  121.43   57.19
  -6  20  -5  125.61   60.66
   6  20   5   88.76   58.41
  -6  20  -6  831.71  172.35
   6  20   6  606.59  184.33
  -6  20  -7  439.09   90.76
   6  20   7  498.67  163.04
  -6  20  -8  365.60   83.80
   6  20   8  386.35  115.71
  -6  20  -9  120.64   37.58
   6  20   9  -88.50   59.87
  -6  20 -10  111.08   53.83
   6  20  10   91.98   46.95
  -6  20 -11  118.34   68.73
   6  20  11  -17.75   57.07
  -6  20 -12  433.33  180.53
   6  20  12  406.11  218.24
  -6  20 -13  456.97  118.73
   6  22 -14  262.71   68.51
   6  22 -13   26.23   33.34
   6  22 -12  117.57   32.04
   6  22 -11   41.49   27.08
  -6  22  11   52.77   33.02
   6  22 -10  112.27   31.95
  -6  22  10  162.65  122.66
   6  22  -9   48.70   24.01
  -6  22   9   84.39   49.60
   6  22  -8   99.08   29.73
  -6  22   8   49.44   28.59
   6  22  -7  435.10   92.08
  -6  22   7  319.96  170.95
   6  22  -6  -66.91   54.47
  -6  22   6   10.03   33.89
   6  22  -5   74.66   39.07
  -6  22   5  106.90   56.42
   6  22  -4   88.24   33.44
  -6  22   4  277.61   95.89
   6  22  -3   81.24   31.49
  -6  22   3  106.40   78.93
   6  22  -2  100.60  102.70
  -6  22   2   -0.32   60.77
  -6  22   1  110.36   70.18
   6  22  -1   68.87   40.28
  -6  22   0  117.59   39.94
   6  22   0   97.86   50.45
  -6  22  -1  116.37   52.19
   6  22   1  173.84   64.22
  -6  22  -2  -13.24   56.60
   6  22   2   99.27   41.60
  -6  22  -3  201.88   71.92
   6  22   3  149.69   60.44
  -6  22  -4  390.92  111.90
   6  22   4  291.14  114.28
  -6  22  -5   73.68   68.03
   6  22   5  200.97   70.80
  -6  22  -6  568.23  147.47
   6  22   6  589.22  215.48
  -6  22  -7  165.49   41.63
   6  22   7  207.12   67.17
  -6  22  -8  720.88  157.71
   6  22   8  521.17  260.12
  -6  22  -9  110.15   45.00
   6  22   9  165.24   76.35
  -6  22 -10   59.74   35.35
   6  24 -10  170.44   47.70
   6  24  -9   -9.70   42.11
   6  24  -8   37.46   32.05
   6  24  -7   31.39   14.47
  -6  24   7  -68.77   57.62
  -6  24   6  230.46   82.50
   6  24  -5  112.98   42.81
  -6  24   5  241.85  103.42
   6  24  -4  509.70  182.26
  -6  24   4  990.82  135.39
   6  24  -3   87.01   42.88
  -6  24   3  191.36   73.93
   6  24  -2   53.30   31.19
  -6  24   2   75.98   34.74
  -6  24   1   38.52   37.67
   6  24  -1   45.77   24.91
  -6  24   0   86.29   51.42
   6  24   0  159.11   52.01
  -6  24  -1   21.66   49.48
   6  24   1   92.78   43.04
  -6  24  -2  194.59   51.92
   6  24   2  174.16   99.82
  -6  24  -3   26.86   36.63
   6  24   3   28.67   39.09
  -6  24  -4  135.83   43.14
   6  24   4  176.31  260.31
  -6  24  -5   44.32   36.17
   6  24   5   82.04   58.33
  -6  24  -6   72.76   53.70
   6  24   6  105.21   70.97
  -7   1  23  142.38   81.00
  -7   1  23    0.00   42.97
  -7  -1  23   67.21   53.05
  -7  -1  23   74.11   50.27
  -7   1  22  116.69   76.80
  -7   1  22   66.34   47.61
  -7  -1  22   49.61   35.06
  -7  -1  22   21.05   29.69
  -7   1  21  929.05  152.17
  -7   1  21 1038.42  101.79
  -7  -1  21  786.92  261.91
  -7  -1  21  948.37  116.48
  -7   1  20  -97.02   50.94
  -7   1  20   55.69   29.90
  -7  -1  20   44.92   42.69
  -7  -1  20   11.04   26.03
  -7   1  19   25.95   38.36
  -7   1  19   90.72   34.66
  -7  -1  19   12.96   34.28
  -7  -1  19   42.22   14.20
   7   1 -18   69.52   56.09
  -7   1  18  -35.23   53.49
  -7   1  18  122.35   43.72
  -7  -1  18   34.32   37.12
  -7   1  17  378.17  127.06
   7   1 -17  399.94   90.75
   7  -1 -17  321.95  128.51
  -7  -1  17  364.74   66.64
  -7   1  16  624.06  130.25
   7   1 -16  545.88  159.14
   7  -1 -16  611.67  144.83
  -7  -1  16  825.87  168.87
  -7   1  15 1580.84  224.27
   7   1 -15 1239.24  136.69
   7  -1 -15 1408.37  119.26
  -7  -1  15 1359.67  176.57
  -7   1  14  137.00   34.21
   7   1 -14  156.55   71.06
   7  -1 -14  145.41   42.46
  -7  -1  14  148.55   68.58
  -7   1  13  263.01   40.87
   7   1 -13  199.37   41.21
   7  -1 -13  111.48   51.77
  -7  -1  13  154.48   40.44
  -7   1  12  267.41   64.25
   7   1 -12  251.12   66.63
   7  -1 -12  313.45   69.39
  -7  -1  12  311.49   71.19
  -7   1  11  410.44   83.43
   7   1 -11  344.71   68.15
   7  -1 -11  391.08   91.88
  -7  -1  11  391.75   97.70
  -7   1  10 4074.96  114.53
   7   1 -10 3956.88  120.54
   7  -1 -10 3835.08  115.79
  -7  -1  10 4254.05   90.23
   7   1  -9  766.80  136.27
  -7   1   9  956.79  117.17
  -7   1   9 1083.65   86.03
  -7  -1   9  798.64   89.70
  -7  -1   9  960.00  100.66
   7  -1  -9  950.20   50.04
  -7   1   8 4284.86  137.01
  -7   1   8 4352.58  113.34
  -7  -1   8 3687.78   97.00
  -7  -1   8 4060.49  139.92
  -7  -1   8 4000.62  108.18
   7  -1  -8 4011.60  102.59
  -7   1   734640.98  111.88
  -7   1   734113.97  157.31
  -7  -1   732183.53  434.62
  -7  -1   730843.72  104.39
  -7  -1   733900.11  141.03
  -7  -1   733544.21  437.29
   7  -1  -732884.44  427.35
  -7   1   6   39.86   28.92
  -7   1   6   48.90   16.37
  -7   1   6   38.35   33.83
  -7  -1   6   62.66   31.78
  -7  -1   6   59.18   24.86
  -7  -1   6   88.12   30.02
  -7  -1   6   79.14   27.79
   7  -1  -6   42.87   24.66
  -7   1   5  835.02   53.20
  -7   1   5  764.73   58.43
  -7  -1   5  715.40  100.47
  -7  -1   5  734.56   52.69
  -7  -1   5  935.23  119.72
   7  -1  -5  827.66   45.88
  -7  -1   5  853.25   39.65
  -7   1   4 9666.45  192.55
  -7   1   4 9511.98  192.44
   7   1  -4 8798.53  196.94
   7  -1  -4 8852.84  178.34
  -7  -1   4 8651.82  168.47
  -7  -1   4 9258.74  186.23
   7  -1  -4 9429.93  180.95
  -7  -1   4 9298.93  176.76
  -7   1   3  890.00   42.12
  -7   1   3  889.29   95.44
   7   1  -3  761.11   42.98
  -7  -1   3  875.32   56.29
   7  -1  -3  815.45   36.69
   7  -1  -3  932.36   25.82
   7   1  -2 7914.19  156.37
  -7   1   2 7608.55  155.98
  -7   1   2 7682.58  147.18
   7  -1  -2 7276.34  145.03
  -7  -1   2 8141.68  189.36
   7  -1  -2 7884.84  151.18
   7   1  -1 8071.60  167.91
  -7   1   1 8710.38  175.75
  -7   1   1 8495.69  168.20
   7   1  -1 8566.59  163.94
   7  -1  -1 8422.32  166.78
   7  -1  -1 8445.25  162.13
  -7  -1   1 8390.10  184.16
  -7  -1   1 7965.93  151.97
   7   1   0  847.12   51.40
  -7   1   0  867.77   48.45
   7   1   0  838.60   34.64
  -7   1   0  873.76   54.40
  -7  -1   0  863.89   34.99
  -7  -1   0  802.79   49.99
   7   1   1   15.88   12.06
  -7   1  -1   16.12   39.26
  -7   1  -1   23.20   10.79
   7   1   1   -4.99   28.62
   7  -1   1   21.38   31.61
   7  -1   1   19.17   13.45
  -7  -1  -1   39.63   24.20
  -7  -1  -1    6.86   17.96
   7   1   2 8326.90  172.83
  -7   1  -2 8833.54  180.80
   7   1   2 7975.29  160.23
   7  -1   2 8266.87  166.65
   7  -1   2 7744.32  156.20
  -7  -1  -2 8504.60  200.61
  -7  -1  -2 7956.32  163.95
  -7   1  -345977.43  291.58
   7   1   345775.71  283.27
   7   1   345236.69  301.92
   7  -1   340836.73  254.91
   7  -1   344526.98  275.41
   7  -1   344551.36  285.98
   7   1   411344.32  227.66
  -7   1  -411610.22  233.87
   7   1   411051.21  219.50
   7  -1   410809.57  215.79
   7  -1   4 9890.34  197.11
  -7  -1  -412094.95  242.30
  -7  -1  -410614.44  213.26
   7  -1   411021.45  292.85
   7   1   5 1461.83   66.72
   7   1   5 1365.13   57.45
  -7  -1  -5 1385.74   59.58
   7  -1   5 1453.86   59.22
   7  -1   5 1565.70   62.67
   7  -1   5 1448.05  100.32
  -7  -1  -5 1440.24   66.96
   7   1   6  140.57   41.77
  -7   1  -6  125.85   42.47
  -7  -1  -6   82.46   43.76
   7  -1   6   82.13   45.18
   7   1   7 1668.67   79.34
  -7   1  -7 1747.55   78.14
  -7  -1  -7 1867.08   77.85
   7  -1   7 1839.38  102.82
   7   1   8   76.99   44.59
  -7   1  -8   56.35   29.06
  -7  -1  -8   46.05   28.10
   7  -1   8   61.94   44.40
   7   1   9  279.04   86.04
  -7   1  -9  309.21  109.19
  -7  -1  -9  233.86   76.28
   7  -1   9  384.62   70.24
   7   1  10  784.36  123.50
  -7   1 -10  635.70  189.07
  -7  -1 -10  824.24   77.07
   7  -1  10  839.46  169.55
   7   1  11  349.88   40.89
  -7   1 -11  242.29   86.64
  -7  -1 -11  361.06   79.06
   7  -1  11  275.04   69.48
   7   1  12  229.29   58.07
  -7   1 -12   88.92   36.11
  -7  -1 -12  108.21   48.53
   7  -1  12  -17.85   52.47
   7   1  13 1109.24  212.27
  -7   1 -13 1019.05  100.92
  -7  -1 -13  995.65  124.92
   7  -1  13  956.72   90.08
   7   1  14  897.22  195.44
  -7   1 -14  819.02  227.50
  -7  -1 -14  914.03  299.91
   7  -1  14 1066.72  238.28
   7   1  15  422.85  123.78
  -7   1 -15  479.79  117.83
  -7  -1 -15  579.03  163.33
   7  -1  15  580.50  188.69
   7   1  16  463.56  145.92
  -7   1 -16  560.90  141.34
  -7  -1 -16  586.62  141.43
   7  -1  16  507.90  145.12
   7   1  17  433.77  117.96
  -7   1 -17  415.43  106.44
  -7  -1 -17  547.62  145.84
   7  -1  17  515.30  113.11
   7   1  18   39.65   38.11
  -7   1 -18  -18.49   53.83
  -7  -1 -18  116.77   54.97
   7  -1  18   73.56   32.82
   7   1  19  490.25  140.04
  -7   1 -19  479.82  199.45
  -7  -1 -19  548.27  153.86
   7  -1  19  388.70   89.97
   7   1  20    6.26   45.61
  -7   1 -20   49.62   37.97
  -7  -1 -20   42.80   58.98
   7  -1  20   15.53   58.65
   7   1  21   72.10   45.01
  -7   1 -21   63.14   60.72
  -7  -1 -21  104.06   84.08
   7  -1  21   17.55   58.87
  -7   3  23  687.88  114.80
  -7  -3  23  845.37  123.28
  -7   3  22   51.48   36.77
  -7   3  22  -56.53   41.50
  -7  -3  22  -16.42   61.25
  -7  -3  22  -19.33   37.88
  -7   3  21 1456.42  155.11
  -7  -3  21 1364.76  126.18
  -7  -3  21 1348.64   87.19
  -7   3  20  137.74   53.16
  -7   3  20   79.60   24.87
  -7  -3  20   59.27   67.12
  -7  -3  20   91.16   19.36
  -7   3  19  776.13  234.81
  -7   3  19  747.35  175.66
  -7  -3  19  669.07  289.07
  -7  -3  19  848.54  111.12
   7   3 -18  386.24  168.06
  -7   3  18  393.97   69.22
  -7   3  18  387.24  112.57
  -7  -3  18  361.99  131.22
   7   3 -17  378.24   77.93
  -7   3  17  431.74   87.54
  -7   3  17  354.86   98.18
  -7  -3  17  304.08   90.58
   7   3 -16 2239.67   84.24
  -7   3  16 2070.92  137.69
  -7   3  16 1997.43  172.97
  -7  -3  16 2054.87  149.81
   7   3 -15   21.03   44.02
  -7   3  15   62.62   87.65
  -7   3  15   46.18   22.20
  -7  -3  15   12.85   35.75
   7   3 -14 2444.08   85.49
  -7   3  14 2585.61  144.46
  -7  -3  14 2752.00   93.26
   7   3 -13  101.94   47.19
  -7   3  13   65.69   22.65
  -7  -3  13   48.01   39.82
   7   3 -12 1459.24   94.96
  -7   3  12 1696.39  112.53
  -7   3  12 1713.94   68.67
  -7  -3  12 1474.54  128.73
   7   3 -11   55.53   20.51
  -7   3  11   23.24   26.17
  -7   3  11   23.75   25.46
  -7  -3  11   52.26   22.78
   7   3 -10  357.91  115.07
  -7   3  10  428.56  122.11
  -7   3  10  477.80  124.34
  -7  -3  10  324.11   58.18
   7   3  -9  249.20   93.10
  -7   3   9  388.53   81.22
  -7   3   9  381.14   95.43
  -7  -3   9  187.86   40.37
  -7  -3   9  302.70   80.74
  -7   3   8  251.94   45.24
  -7   3   8  113.15   44.91
  -7  -3   8  215.44   52.17
  -7  -3   8  198.52   33.48
  -7  -3   8  225.59   47.36
   7  -3  -8  192.63   70.10
  -7  -3   8  227.90   47.31
  -7   3   7 8816.92  149.69
  -7  -3   7 8450.45  132.11
  -7  -3   7 7850.04  126.12
  -7  -3   7 8389.43  170.26
   7  -3  -7 8474.37  124.53
  -7  -3   7 8275.60  123.74
  -7   3   610623.61  163.67
  -7   3   611510.79  163.31
  -7   3   611227.69  165.87
   7   3  -610316.13  144.07
  -7  -3   610766.68  157.44
  -7  -3   610139.38  141.83
  -7  -3   610492.69  147.73
   7  -3  -611139.67  156.55
   7   3  -5 1227.07   37.63
  -7   3   5 1407.21  156.63
  -7   3   5 1402.42  120.82
   7  -3  -5 1264.55   59.53
  -7  -3   5 1174.08   35.99
  -7  -3   5 1150.40   73.07
  -7  -3   5 1248.50   36.63
   7  -3  -5 1309.08   55.77
   7   3  -4 1270.45   50.08
  -7   3   4 1180.30  141.17
  -7   3   4 1272.23  102.47
   7   3  -4 1127.19   29.44
  -7  -3   4 1225.88   38.36
  -7  -3   4 1176.56   27.62
   7  -3  -4 1026.23  102.83
   7  -3  -4 1213.51   58.85
  -7   3   310055.99  197.10
  -7   3   3 9972.50  200.39
   7   3  -3 9730.05  197.65
   7   3  -3 9963.15  191.14
   7  -3  -3 9428.31  217.19
  -7  -3   3 9699.63  198.87
  -7  -3   3 9842.57  188.04
   7  -3  -310005.16  194.10
   7   3  -2 2561.89   55.94
   7   3  -2 2429.82   73.53
[truncated: 1,030,750 more chars]
