# Supplementary material for: Approach to the “Missing” Diarylsilylene: Formation, Characterization, and Intramolecular C–H Bond Activation of Blue Diarylsilylenes with Bulky Rind Groups
Source: Int J Mol Sci. 2024 Mar 28;25(7):3761. doi: 10.3390/ijms25073761 (PMC11011690; doi:10.3390/ijms25073761)
Supplement: Supplementary file 1 [file ijms-25-03761-s001.zip › CrystalB.cif]

data_Cyclic

# start Validation Reply Form
_vrf_PLAT230_Cyclic
;
PROBLEM: Hirshfeld Test Diff for    Si1      --C13      .       13.6 s.u. 
RESPONSE: The large residual of the Hirshfeld test is due to 
the small and spherical atomic displacement of the Si atom 
but the C13 atom.
;
# end Validation Reply Form

_audit_creation_method            'SHELXL-2019/3'
_shelx_SHELXL_version_number      '2019/3'
_chemical_name_systematic         ?
_chemical_name_common             ?
_chemical_melting_point           ?
_chemical_formula_moiety         'C56 H90 Si'
_chemical_formula_sum            'C56 H90 Si'
_chemical_formula_weight          791.36

loop_
 _atom_type_symbol
 _atom_type_description
 _atom_type_scat_dispersion_real
 _atom_type_scat_dispersion_imag
 _atom_type_scat_source
 'C'  'C'   0.0033   0.0016
 'International Tables Vol C Tables 4.2.6.8 and 6.1.1.4'
 'H'  'H'   0.0000   0.0000
 'International Tables Vol C Tables 4.2.6.8 and 6.1.1.4'
 'Si'  'Si'   0.0817   0.0704
 'International Tables Vol C Tables 4.2.6.8 and 6.1.1.4'
 
_space_group_crystal_system       triclinic
_space_group_IT_number            2
_space_group_name_H-M_alt         'P -1'
_space_group_name_Hall            '-P 1'
 
_shelx_space_group_comment
;
The symmetry employed for this shelxl refinement is uniquely defined
by the following loop, which should always be used as a source of
symmetry information in preference to the above space-group names.
They are only intended as comments.
;
 
loop_
 _space_group_symop_operation_xyz
 'x, y, z'
 '-x, -y, -z'
 
_cell_length_a                    10.1298(6)
_cell_length_b                    10.1400(6)
_cell_length_c                    24.4558(13)
_cell_angle_alpha                 84.557(5)
_cell_angle_beta                  85.566(5)
_cell_angle_gamma                 78.612(5)
_cell_volume                      2447.0(2)
_cell_formula_units_Z             2
_cell_measurement_temperature     100
_cell_measurement_reflns_used   3522
_cell_measurement_theta_min     2.0460
_cell_measurement_theta_max     28.5790
 
_exptl_crystal_description        block
_exptl_crystal_colour             colourless
_exptl_crystal_density_meas       ?
_exptl_crystal_density_method     ?
_exptl_crystal_density_diffrn     1.074
_exptl_crystal_F_000              880
_exptl_transmission_factor_min    ?
_exptl_transmission_factor_max    ?
_exptl_crystal_size_max           0.260
_exptl_crystal_size_mid           0.090
_exptl_crystal_size_min           0.040
_exptl_absorpt_coefficient_mu     0.083
_shelx_estimated_absorpt_T_min    0.979
_shelx_estimated_absorpt_T_max    0.997
_exptl_absorpt_correction_T_min   0.991
_exptl_absorpt_correction_T_max   0.997
_exptl_absorpt_correction_type    Gaussian
_exptl_absorpt_process_details
;
CrysAlisPro 1.171.43.109a (Rigaku Oxford Diffraction, 2024)
Numerical absorption correction based on gaussian integration over
a multifaceted crystal model
Empirical absorption correction using spherical harmonics,
implemented in SCALE3 ABSPACK scaling algorithm.
;
_exptl_absorpt_special_details    ?
_diffrn_ambient_temperature       100
_diffrn_radiation_wavelength      0.71073
_diffrn_radiation_type            MoK\a
_diffrn_source 'Rotating-anode X-ray tube (dual wavelength)'
_diffrn_source_type 'Rigaku (Mo) X-ray DW Source'
_diffrn_radiation_probe x-ray
_diffrn_radiation_monochromator mirror
_diffrn_measurement_device 'four-circle diffractometer'
_diffrn_measurement_device_type 'XtaLAB AFC12 (RINC): Kappa single'
_diffrn_detector 'Hybrid Pixel Array Detector'
_diffrn_detector_area_resol_mean 5.8140
_diffrn_reflns_number             20736
_diffrn_reflns_av_unetI/netI      0.1584
_diffrn_reflns_av_R_equivalents   0.0706
_diffrn_reflns_limit_h_min        -13
_diffrn_reflns_limit_h_max        13
_diffrn_reflns_limit_k_min        -13
_diffrn_reflns_limit_k_max        13
_diffrn_reflns_limit_l_min        -33
_diffrn_reflns_limit_l_max        31
_diffrn_reflns_theta_min          2.055
_diffrn_reflns_theta_max          29.265
_diffrn_reflns_theta_full         25.242
_diffrn_measured_fraction_theta_max   0.859
_diffrn_measured_fraction_theta_full  0.970
_diffrn_reflns_Laue_measured_fraction_max    0.859
_diffrn_reflns_Laue_measured_fraction_full   0.970
_diffrn_reflns_point_group_measured_fraction_max   0.859
_diffrn_reflns_point_group_measured_fraction_full  0.970
_reflns_number_total              11460
_reflns_number_gt                 6257
_reflns_threshold_expression      'I > 2\s(I)'
_reflns_Friedel_coverage          0.000
_reflns_Friedel_fraction_max      .
_reflns_Friedel_fraction_full     .
 
_reflns_special_details
;
 Reflections were merged by SHELXL according to the crystal
 class for the calculation of statistics and refinement.
 
 _reflns_Friedel_fraction is defined as the number of unique
 Friedel pairs measured divided by the number that would be
 possible theoretically, ignoring centric projections and
 systematic absences.
;
 
_computing_data_collection     'CrysAlisPro system (CCD 39.46e (release 04-06-2018))'
_computing_cell_refinement     'CrysAlisPro 1.171.43.109a (Rigaku OD, 2024)'
_computing_data_reduction      'CrysAlisPro 1.171.43.109a (Rigaku OD, 2024)'
_computing_structure_solution   'SHELXT-2018/2'
_computing_structure_refinement 'SHELXL-2019/3 (Sheldrick, 2019)'
_computing_molecular_graphics   'SHELXLE'
_computing_publication_material 'SHELXL-2019/3 (Sheldrick, 2019)'
_refine_special_details           ?
_refine_ls_structure_factor_coef  Fsqd
_refine_ls_matrix_type            full
_refine_ls_weighting_scheme       calc
_refine_ls_weighting_details
'w=1/[\s^2^(Fo^2^)+(0.0588P)^2^] where P=(Fo^2^+2Fc^2^)/3'
_atom_sites_solution_primary     'dual space'
_atom_sites_solution_secondary    difmap
_atom_sites_solution_hydrogens    difmap
_refine_ls_hydrogen_treatment     mixed
_refine_ls_extinction_method      none
_refine_ls_extinction_coef        .
_refine_ls_number_reflns          11460
_refine_ls_number_parameters      534
_refine_ls_number_restraints      0
_refine_ls_R_factor_all           0.1496
_refine_ls_R_factor_gt            0.0768
_refine_ls_wR_factor_ref          0.1914
_refine_ls_wR_factor_gt           0.1630
_refine_ls_goodness_of_fit_ref    1.023
_refine_ls_restrained_S_all       1.023
_refine_ls_shift/su_max           0.000
_refine_ls_shift/su_mean          0.000
 
loop_
 _atom_site_label
 _atom_site_type_symbol
 _atom_site_fract_x
 _atom_site_fract_y
 _atom_site_fract_z
 _atom_site_U_iso_or_equiv
 _atom_site_adp_type
 _atom_site_occupancy
 _atom_site_site_symmetry_order  
 _atom_site_calc_flag
 _atom_site_refinement_flags_posn
 _atom_site_refinement_flags_adp
 _atom_site_refinement_flags_occupancy
 _atom_site_disorder_assembly
 _atom_site_disorder_group
Si1 Si 0.39344(7) 0.54759(7) 0.76520(3) 0.02332(19) Uani 1 1 d . . . . .
H1 H 0.320(2) 0.6747(19) 0.7894(8) 0.007(5) Uiso 1 1 d . . . . .
C1 C 0.3641(2) 0.4180(2) 0.82328(10) 0.0211(5) Uani 1 1 d . . . . .
C2 C 0.4757(2) 0.4033(2) 0.85462(10) 0.0238(6) Uani 1 1 d . . . . .
C3 C 0.5798(3) 0.4920(3) 0.84443(11) 0.0275(6) Uani 1 1 d . . . . .
C4 C 0.7021(3) 0.3978(3) 0.87016(12) 0.0320(6) Uani 1 1 d . . . . .
H4A H 0.759773 0.451441 0.885694 0.038 Uiso 1 1 calc R U . . .
H4B H 0.756928 0.343658 0.841884 0.038 Uiso 1 1 calc R U . . .
C5 C 0.6460(2) 0.3032(3) 0.91663(11) 0.0278(6) Uani 1 1 d . . . . .
C6 C 0.5080(3) 0.3029(3) 0.89689(10) 0.0262(6) Uani 1 1 d . . . . .
C7 C 0.4192(2) 0.2184(3) 0.91277(11) 0.0278(6) Uani 1 1 d . . . . .
H7 H 0.439021 0.148363 0.941279 0.033 Uiso 1 1 calc R U . . .
C8 C 0.2988(3) 0.2376(2) 0.88612(10) 0.0253(6) Uani 1 1 d . . . . .
C9 C 0.1894(3) 0.1566(2) 0.89976(11) 0.0272(6) Uani 1 1 d . . . . .
C10 C 0.0729(2) 0.2401(2) 0.86640(10) 0.0257(6) Uani 1 1 d . . . . .
H10A H 0.005855 0.294082 0.891145 0.031 Uiso 1 1 calc R U . . .
H10B H 0.027064 0.178970 0.848784 0.031 Uiso 1 1 calc R U . . .
C11 C 0.1329(2) 0.3348(2) 0.82180(10) 0.0216(5) Uani 1 1 d . . . . .
C12 C 0.2716(2) 0.3343(2) 0.84210(10) 0.0228(6) Uani 1 1 d . . . . .
C13 C 0.5847(3) 0.5243(3) 0.78029(12) 0.0363(7) Uani 1 1 d . . . . .
H13 H 0.631150 0.439082 0.764130 0.044 Uiso 1 1 calc R U . . .
C14 C 0.6597(3) 0.6325(3) 0.75611(13) 0.0457(8) Uani 1 1 d . . . . .
H14A H 0.664131 0.634816 0.715861 0.069 Uiso 1 1 calc R U . . .
H14B H 0.751359 0.612811 0.768955 0.069 Uiso 1 1 calc R U . . .
H14C H 0.612489 0.720210 0.767756 0.069 Uiso 1 1 calc R U . . .
C15 C 0.5309(3) 0.6241(3) 0.87386(11) 0.0311(6) Uani 1 1 d . . . . .
H15A H 0.466516 0.686284 0.850331 0.037 Uiso 1 1 calc R U . . .
H15B H 0.480219 0.601435 0.908592 0.037 Uiso 1 1 calc R U . . .
C16 C 0.6382(3) 0.7005(3) 0.88757(13) 0.0421(8) Uani 1 1 d . . . . .
H16A H 0.695302 0.716612 0.854360 0.063 Uiso 1 1 calc R U . . .
H16B H 0.693912 0.646727 0.915833 0.063 Uiso 1 1 calc R U . . .
H16C H 0.594327 0.787059 0.901323 0.063 Uiso 1 1 calc R U . . .
C17 C 0.7315(3) 0.1603(3) 0.92178(12) 0.0367(7) Uani 1 1 d . . . . .
H17A H 0.824072 0.167617 0.929687 0.044 Uiso 1 1 calc R U . . .
H17B H 0.694334 0.109791 0.954023 0.044 Uiso 1 1 calc R U . . .
C18 C 0.7412(3) 0.0776(3) 0.87265(13) 0.0410(8) Uani 1 1 d . . . . .
H18A H 0.650588 0.068429 0.864251 0.061 Uiso 1 1 calc R U . . .
H18B H 0.795927 -0.012114 0.881174 0.061 Uiso 1 1 calc R U . . .
H18C H 0.783483 0.122902 0.840770 0.061 Uiso 1 1 calc R U . . .
C19 C 0.6297(3) 0.3614(3) 0.97277(12) 0.0404(7) Uani 1 1 d . . . . .
H19A H 0.568675 0.450627 0.969425 0.049 Uiso 1 1 calc R U . . .
H19B H 0.584392 0.301864 0.999127 0.049 Uiso 1 1 calc R U . . .
C20 C 0.7588(3) 0.3790(3) 0.99738(13) 0.0482(8) Uani 1 1 d . . . . .
H20A H 0.804514 0.438919 0.972167 0.072 Uiso 1 1 calc R U . . .
H20B H 0.818607 0.290809 1.002982 0.072 Uiso 1 1 calc R U . . .
H20C H 0.736016 0.418374 1.032772 0.072 Uiso 1 1 calc R U . . .
C21 C 0.2391(3) 0.0146(3) 0.87928(13) 0.0372(7) Uani 1 1 d . . . . .
H21A H 0.257575 0.024744 0.838912 0.045 Uiso 1 1 calc R U . . .
H21B H 0.325575 -0.025634 0.895830 0.045 Uiso 1 1 calc R U . . .
C22 C 0.1428(3) -0.0837(3) 0.89205(15) 0.0536(9) Uani 1 1 d . . . . .
H22A H 0.054893 -0.043260 0.877773 0.080 Uiso 1 1 calc R U . . .
H22B H 0.132157 -0.103605 0.931968 0.080 Uiso 1 1 calc R U . . .
H22C H 0.179538 -0.167434 0.874629 0.080 Uiso 1 1 calc R U . . .
C23 C 0.1506(3) 0.1422(3) 0.96185(11) 0.0368(7) Uani 1 1 d . . . . .
H23A H 0.065750 0.106690 0.966959 0.044 Uiso 1 1 calc R U . . .
H23B H 0.221519 0.073790 0.979582 0.044 Uiso 1 1 calc R U . . .
C24 C 0.1312(3) 0.2688(3) 0.99177(12) 0.0434(8) Uani 1 1 d . . . . .
H24A H 0.215957 0.302391 0.989220 0.065 Uiso 1 1 calc R U . . .
H24B H 0.104318 0.248498 1.030536 0.065 Uiso 1 1 calc R U . . .
H24C H 0.060713 0.337724 0.974986 0.065 Uiso 1 1 calc R U . . .
C25 C 0.1449(2) 0.2788(3) 0.76457(10) 0.0264(6) Uani 1 1 d . . . . .
H25A H 0.202410 0.329194 0.739484 0.032 Uiso 1 1 calc R U . . .
H25B H 0.191746 0.183239 0.768132 0.032 Uiso 1 1 calc R U . . .
C26 C 0.0124(3) 0.2861(3) 0.73803(11) 0.0332(7) Uani 1 1 d . . . . .
H26A H -0.027919 0.380696 0.728342 0.050 Uiso 1 1 calc R U . . .
H26B H -0.049558 0.245024 0.763945 0.050 Uiso 1 1 calc R U . . .
H26C H 0.029286 0.237233 0.704703 0.050 Uiso 1 1 calc R U . . .
C27 C 0.0477(2) 0.4778(2) 0.81744(10) 0.0258(6) Uani 1 1 d . . . . .
H27A H 0.083530 0.528978 0.785051 0.031 Uiso 1 1 calc R U . . .
H27B H -0.045628 0.471334 0.810394 0.031 Uiso 1 1 calc R U . . .
C28 C 0.0421(3) 0.5590(3) 0.86750(12) 0.0331(7) Uani 1 1 d . . . . .
H28A H 0.133721 0.566727 0.875112 0.050 Uiso 1 1 calc R U . . .
H28B H 0.001136 0.512952 0.899525 0.050 Uiso 1 1 calc R U . . .
H28C H -0.012187 0.649354 0.859936 0.050 Uiso 1 1 calc R U . . .
C29 C 0.3344(3) 0.5431(2) 0.69325(10) 0.0236(6) Uani 1 1 d . . . . .
C30 C 0.2347(2) 0.6509(2) 0.67195(10) 0.0224(6) Uani 1 1 d . . . . .
C31 C 0.1765(3) 0.7941(2) 0.69178(11) 0.0259(6) Uani 1 1 d . . . . .
C32 C 0.1039(3) 0.8662(2) 0.64036(11) 0.0286(6) Uani 1 1 d . . . . .
H32A H 0.020670 0.928659 0.652007 0.034 Uiso 1 1 calc R U . . .
H32B H 0.163512 0.919456 0.617866 0.034 Uiso 1 1 calc R U . . .
C33 C 0.0688(3) 0.7613(3) 0.60650(11) 0.0289(6) Uani 1 1 d . . . . .
C34 C 0.1742(3) 0.6393(2) 0.62339(10) 0.0247(6) Uani 1 1 d . . . . .
C35 C 0.2064(3) 0.5247(2) 0.59579(11) 0.0276(6) Uani 1 1 d . . . . .
H35 H 0.159175 0.516172 0.564632 0.033 Uiso 1 1 calc R U . . .
C37 C 0.3560(3) 0.2912(2) 0.58728(10) 0.0272(6) Uani 1 1 d . . . . .
C38 C 0.4910(3) 0.2357(2) 0.61389(11) 0.0286(6) Uani 1 1 d . . . . .
H38A H 0.566938 0.241505 0.586310 0.034 Uiso 1 1 calc R U . . .
H38B H 0.495758 0.139664 0.627228 0.034 Uiso 1 1 calc R U . . .
C39 C 0.5022(2) 0.3193(2) 0.66276(10) 0.0245(6) Uani 1 1 d . . . . .
C40 C 0.3757(3) 0.4328(2) 0.66038(10) 0.0232(6) Uani 1 1 d . . . . .
C41 C 0.0748(3) 0.7869(3) 0.74184(11) 0.0318(6) Uani 1 1 d . . . . .
H41A H 0.008581 0.733272 0.733066 0.038 Uiso 1 1 calc R U . . .
H41B H 0.124123 0.737587 0.773308 0.038 Uiso 1 1 calc R U . . .
C42 C -0.0023(3) 0.9219(3) 0.75990(13) 0.0453(8) Uani 1 1 d . . . . .
H42A H 0.061548 0.975213 0.770011 0.068 Uiso 1 1 calc R U . . .
H42B H -0.063951 0.906362 0.791711 0.068 Uiso 1 1 calc R U . . .
H42C H -0.054204 0.970997 0.729586 0.068 Uiso 1 1 calc R U . . .
C43 C 0.2825(3) 0.8761(2) 0.70396(11) 0.0296(6) Uani 1 1 d . . . . .
H43A H 0.240344 0.973072 0.701155 0.036 Uiso 1 1 calc R U . . .
H43B H 0.307688 0.851170 0.742425 0.036 Uiso 1 1 calc R U . . .
C44 C 0.4107(3) 0.8568(3) 0.66647(13) 0.0380(7) Uani 1 1 d . . . . .
H44A H 0.387081 0.874734 0.628000 0.057 Uiso 1 1 calc R U . . .
H44B H 0.460173 0.763867 0.672518 0.057 Uiso 1 1 calc R U . . .
H44C H 0.467329 0.919514 0.674734 0.057 Uiso 1 1 calc R U . . .
C45 C -0.0722(3) 0.7266(3) 0.62234(13) 0.0384(7) Uani 1 1 d . . . . .
H45A H -0.084138 0.654181 0.599793 0.046 Uiso 1 1 calc R U . . .
H45B H -0.074011 0.689850 0.661308 0.046 Uiso 1 1 calc R U . . .
C46 C -0.1916(3) 0.8426(3) 0.61531(16) 0.0582(10) Uani 1 1 d . . . . .
H46A H -0.192780 0.878845 0.576717 0.087 Uiso 1 1 calc R U . . .
H46B H -0.183515 0.913737 0.638601 0.087 Uiso 1 1 calc R U . . .
H46C H -0.275437 0.809935 0.626074 0.087 Uiso 1 1 calc R U . . .
C47 C 0.0775(3) 0.8021(3) 0.54423(11) 0.0360(7) Uani 1 1 d . . . . .
H47A H 0.049233 0.731515 0.525021 0.043 Uiso 1 1 calc R U . . .
H47B H 0.011334 0.886785 0.536969 0.043 Uiso 1 1 calc R U . . .
C48 C 0.2134(3) 0.8231(3) 0.51882(12) 0.0420(8) Uani 1 1 d . . . . .
H48A H 0.208503 0.841158 0.478869 0.063 Uiso 1 1 calc R U . . .
H48B H 0.281364 0.741777 0.526995 0.063 Uiso 1 1 calc R U . . .
H48C H 0.238328 0.900049 0.534120 0.063 Uiso 1 1 calc R U . . .
C49 C 0.3079(3) 0.4222(2) 0.61368(10) 0.0234(6) Uani 1 1 d . . . . .
C50 C 0.2571(3) 0.1949(3) 0.60461(12) 0.0315(6) Uani 1 1 d . . . . .
H50A H 0.297966 0.104988 0.592167 0.038 Uiso 1 1 calc R U . . .
H50B H 0.247694 0.185155 0.645309 0.038 Uiso 1 1 calc R U . . .
C51 C 0.1166(3) 0.2359(3) 0.58320(13) 0.0394(7) Uani 1 1 d . . . . .
H51A H 0.123659 0.247733 0.542907 0.059 Uiso 1 1 calc R U . . .
H51B H 0.071116 0.320958 0.597826 0.059 Uiso 1 1 calc R U . . .
H51C H 0.064458 0.165372 0.595056 0.059 Uiso 1 1 calc R U . . .
C52 C 0.3751(3) 0.3122(3) 0.52446(11) 0.0337(7) Uani 1 1 d . . . . .
H52A H 0.288163 0.358984 0.509805 0.040 Uiso 1 1 calc R U . . .
H52B H 0.441160 0.372148 0.515114 0.040 Uiso 1 1 calc R U . . .
C53 C 0.4235(3) 0.1824(3) 0.49588(12) 0.0424(8) Uani 1 1 d . . . . .
H53A H 0.443409 0.204808 0.456625 0.064 Uiso 1 1 calc R U . . .
H53B H 0.352914 0.127981 0.500305 0.064 Uiso 1 1 calc R U . . .
H53C H 0.505271 0.131144 0.512336 0.064 Uiso 1 1 calc R U . . .
C54 C 0.5054(3) 0.2272(2) 0.71692(11) 0.0285(6) Uani 1 1 d . . . . .
H54A H 0.494081 0.284645 0.748133 0.034 Uiso 1 1 calc R U . . .
H54B H 0.427100 0.181426 0.719276 0.034 Uiso 1 1 calc R U . . .
C55 C 0.6326(3) 0.1202(3) 0.72367(12) 0.0376(7) Uani 1 1 d . . . . .
H55A H 0.653118 0.071436 0.690379 0.056 Uiso 1 1 calc R U . . .
H55B H 0.618705 0.056688 0.755385 0.056 Uiso 1 1 calc R U . . .
H55C H 0.708067 0.163573 0.729608 0.056 Uiso 1 1 calc R U . . .
C56 C 0.6307(3) 0.3794(3) 0.65298(11) 0.0305(6) Uani 1 1 d . . . . .
H56A H 0.642743 0.423283 0.686249 0.037 Uiso 1 1 calc R U . . .
H56B H 0.708900 0.304712 0.648390 0.037 Uiso 1 1 calc R U . . .
C57 C 0.6324(3) 0.4826(3) 0.60314(12) 0.0416(7) Uani 1 1 d . . . . .
H57A H 0.621455 0.440440 0.569748 0.062 Uiso 1 1 calc R U . . .
H57B H 0.718542 0.513683 0.599763 0.062 Uiso 1 1 calc R U . . .
H57C H 0.558298 0.559655 0.607975 0.062 Uiso 1 1 calc R U . . .
 
loop_
 _atom_site_aniso_label
 _atom_site_aniso_U_11
 _atom_site_aniso_U_22
 _atom_site_aniso_U_33
 _atom_site_aniso_U_23
 _atom_site_aniso_U_13
 _atom_site_aniso_U_12
Si1 0.0282(4) 0.0226(4) 0.0194(4) 0.0004(3) -0.0005(3) -0.0067(3)
C1 0.0237(12) 0.0209(13) 0.0193(13) -0.0013(10) -0.0020(10) -0.0053(11)
C2 0.0262(13) 0.0266(14) 0.0186(13) -0.0017(11) 0.0011(11) -0.0064(11)
C3 0.0280(14) 0.0300(15) 0.0245(14) 0.0003(12) 0.0020(11) -0.0078(12)
C4 0.0253(14) 0.0379(16) 0.0337(16) -0.0018(13) 0.0007(12) -0.0093(13)
C5 0.0217(13) 0.0395(16) 0.0229(14) 0.0011(12) -0.0026(11) -0.0085(12)
C6 0.0264(13) 0.0327(15) 0.0194(13) -0.0002(11) -0.0031(11) -0.0062(12)
C7 0.0273(14) 0.0280(14) 0.0261(14) 0.0075(11) -0.0034(11) -0.0047(12)
C8 0.0268(13) 0.0252(14) 0.0242(14) 0.0000(11) -0.0013(11) -0.0069(11)
C9 0.0268(14) 0.0278(14) 0.0280(14) 0.0065(12) -0.0045(12) -0.0105(12)
C10 0.0250(13) 0.0286(14) 0.0236(14) 0.0029(11) -0.0029(11) -0.0071(11)
C11 0.0218(12) 0.0204(13) 0.0224(13) 0.0008(10) -0.0031(10) -0.0038(10)
C12 0.0231(13) 0.0263(14) 0.0193(13) -0.0023(11) -0.0020(10) -0.0049(11)
C13 0.0471(18) 0.0318(16) 0.0302(16) -0.0037(13) 0.0089(13) -0.0118(14)
C14 0.0416(18) 0.0513(19) 0.0428(19) 0.0035(15) -0.0011(15) -0.0094(16)
C15 0.0345(15) 0.0326(16) 0.0288(15) -0.0077(12) -0.0015(12) -0.0107(13)
C16 0.0416(17) 0.0390(17) 0.050(2) -0.0077(15) -0.0146(15) -0.0110(15)
C17 0.0232(14) 0.0465(17) 0.0382(17) 0.0121(14) -0.0055(12) -0.0074(13)
C18 0.0356(16) 0.0324(16) 0.052(2) 0.0026(15) -0.0001(15) -0.0041(13)
C19 0.0297(15) 0.065(2) 0.0280(16) -0.0053(15) -0.0052(13) -0.0107(15)
C20 0.0431(18) 0.068(2) 0.0350(18) 0.0008(16) -0.0121(15) -0.0138(17)
C21 0.0362(16) 0.0285(15) 0.0474(19) 0.0058(14) -0.0098(14) -0.0085(13)
C22 0.061(2) 0.0375(18) 0.067(2) 0.0105(17) -0.0150(19) -0.0242(17)
C23 0.0306(15) 0.0474(18) 0.0324(16) 0.0144(14) -0.0063(13) -0.0139(14)
C24 0.0389(17) 0.065(2) 0.0278(16) -0.0016(15) -0.0001(14) -0.0144(16)
C25 0.0277(14) 0.0284(14) 0.0241(14) -0.0018(11) 0.0000(11) -0.0087(12)
C26 0.0364(15) 0.0390(16) 0.0278(15) -0.0039(13) -0.0056(13) -0.0139(14)
C27 0.0237(13) 0.0249(14) 0.0285(15) 0.0011(11) -0.0008(11) -0.0061(11)
C28 0.0330(15) 0.0299(15) 0.0356(16) -0.0034(13) 0.0031(13) -0.0054(13)
C29 0.0306(14) 0.0192(13) 0.0203(13) 0.0012(10) -0.0007(11) -0.0048(11)
C30 0.0280(13) 0.0210(13) 0.0187(13) -0.0002(10) 0.0012(11) -0.0075(11)
C31 0.0303(14) 0.0175(13) 0.0291(15) -0.0024(11) 0.0011(12) -0.0032(11)
C32 0.0278(14) 0.0233(14) 0.0317(15) 0.0011(12) 0.0007(12) -0.0004(11)
C33 0.0289(14) 0.0254(14) 0.0308(15) 0.0028(12) -0.0034(12) -0.0033(12)
C34 0.0292(14) 0.0199(13) 0.0246(14) 0.0023(11) -0.0017(11) -0.0054(11)
C35 0.0336(15) 0.0287(15) 0.0215(14) 0.0001(11) -0.0042(12) -0.0083(12)
C37 0.0391(15) 0.0206(14) 0.0213(13) -0.0014(11) -0.0024(12) -0.0042(12)
C38 0.0345(15) 0.0232(14) 0.0282(15) -0.0051(12) 0.0020(12) -0.0056(12)
C39 0.0276(13) 0.0207(13) 0.0237(14) -0.0017(11) 0.0001(11) -0.0020(11)
C40 0.0304(14) 0.0167(13) 0.0217(13) 0.0027(10) -0.0013(11) -0.0049(11)
C41 0.0371(15) 0.0258(14) 0.0310(16) -0.0038(12) 0.0048(12) -0.0042(12)
C42 0.0515(19) 0.0379(17) 0.0403(19) -0.0084(15) 0.0107(15) 0.0038(15)
C43 0.0364(15) 0.0173(13) 0.0346(16) 0.0017(12) -0.0041(13) -0.0048(12)
C44 0.0389(16) 0.0227(15) 0.052(2) 0.0031(13) 0.0021(14) -0.0092(13)
C45 0.0318(15) 0.0411(17) 0.0423(18) -0.0016(14) -0.0034(13) -0.0073(14)
C46 0.0332(17) 0.059(2) 0.079(3) -0.012(2) -0.0054(17) 0.0034(16)
C47 0.0396(16) 0.0339(16) 0.0313(16) 0.0050(13) -0.0070(13) -0.0009(13)
C48 0.0519(19) 0.0402(17) 0.0299(16) 0.0037(14) 0.0030(14) -0.0041(15)
C49 0.0291(14) 0.0203(13) 0.0212(13) 0.0009(11) -0.0003(11) -0.0076(11)
C50 0.0414(16) 0.0213(14) 0.0323(16) -0.0018(12) -0.0053(13) -0.0064(12)
C51 0.0439(17) 0.0353(16) 0.0419(18) 0.0036(14) -0.0105(15) -0.0148(14)
C52 0.0486(18) 0.0307(16) 0.0216(14) -0.0048(12) 0.0015(13) -0.0073(14)
C53 0.0519(19) 0.0423(18) 0.0326(17) -0.0092(14) 0.0029(15) -0.0071(15)
C54 0.0339(15) 0.0217(13) 0.0260(14) 0.0018(11) 0.0015(12) 0.0014(11)
C55 0.0415(17) 0.0282(15) 0.0375(17) -0.0003(13) -0.0047(14) 0.0065(13)
C56 0.0320(15) 0.0303(15) 0.0287(15) -0.0044(12) 0.0020(12) -0.0050(12)
C57 0.0429(17) 0.0435(18) 0.0393(18) 0.0028(14) 0.0051(14) -0.0164(15)
 
_geom_special_details
;
 All esds (except the esd in the dihedral angle between two l.s. planes)
 are estimated using the full covariance matrix.  The cell esds are taken
 into account individually in the estimation of esds in distances, angles
 and torsion angles; correlations between esds in cell parameters are only
 used when they are defined by crystal symmetry.  An approximate (isotropic)
 treatment of cell esds is used for estimating esds involving l.s. planes.
;
 
loop_
 _geom_bond_atom_site_label_1
 _geom_bond_atom_site_label_2
 _geom_bond_distance
 _geom_bond_site_symmetry_2
 _geom_bond_publ_flag
Si1 C1 1.889(3) . ?
Si1 C29 1.909(2) . ?
Si1 C13 1.964(3) . ?
Si1 H1 1.505(19) . ?
C1 C2 1.391(3) . ?
C1 C12 1.408(3) . ?
C2 C6 1.391(3) . ?
C2 C3 1.508(3) . ?
C3 C4 1.543(3) . ?
C3 C15 1.557(4) . ?
C3 C13 1.571(4) . ?
C4 C5 1.563(4) . ?
C4 H4A 0.9900 . ?
C4 H4B 0.9900 . ?
C5 C6 1.515(3) . ?
C5 C19 1.530(4) . ?
C5 C17 1.533(4) . ?
C6 C7 1.371(3) . ?
C7 C8 1.398(3) . ?
C7 H7 0.9500 . ?
C8 C12 1.391(3) . ?
C8 C9 1.505(3) . ?
C9 C23 1.540(4) . ?
C9 C21 1.546(4) . ?
C9 C10 1.549(3) . ?
C10 C11 1.552(3) . ?
C10 H10A 0.9900 . ?
C10 H10B 0.9900 . ?
C11 C12 1.525(3) . ?
C11 C27 1.533(3) . ?
C11 C25 1.547(3) . ?
C13 C14 1.506(4) . ?
C13 H13 1.0000 . ?
C14 H14A 0.9800 . ?
C14 H14B 0.9800 . ?
C14 H14C 0.9800 . ?
C15 C16 1.527(4) . ?
C15 H15A 0.9900 . ?
C15 H15B 0.9900 . ?
C16 H16A 0.9800 . ?
C16 H16B 0.9800 . ?
C16 H16C 0.9800 . ?
C17 C18 1.516(4) . ?
C17 H17A 0.9900 . ?
C17 H17B 0.9900 . ?
C18 H18A 0.9800 . ?
C18 H18B 0.9800 . ?
C18 H18C 0.9800 . ?
C19 C20 1.529(4) . ?
C19 H19A 0.9900 . ?
C19 H19B 0.9900 . ?
C20 H20A 0.9800 . ?
C20 H20B 0.9800 . ?
C20 H20C 0.9800 . ?
C21 C22 1.523(4) . ?
C21 H21A 0.9900 . ?
C21 H21B 0.9900 . ?
C22 H22A 0.9800 . ?
C22 H22B 0.9800 . ?
C22 H22C 0.9800 . ?
C23 C24 1.510(4) . ?
C23 H23A 0.9900 . ?
C23 H23B 0.9900 . ?
C24 H24A 0.9800 . ?
C24 H24B 0.9800 . ?
C24 H24C 0.9800 . ?
C25 C26 1.521(3) . ?
C25 H25A 0.9900 . ?
C25 H25B 0.9900 . ?
C26 H26A 0.9800 . ?
C26 H26B 0.9800 . ?
C26 H26C 0.9800 . ?
C27 C28 1.530(4) . ?
C27 H27A 0.9900 . ?
C27 H27B 0.9900 . ?
C28 H28A 0.9800 . ?
C28 H28B 0.9800 . ?
C28 H28C 0.9800 . ?
C29 C40 1.416(3) . ?
C29 C30 1.422(3) . ?
C30 C34 1.403(3) . ?
C30 C31 1.564(3) . ?
C31 C43 1.543(4) . ?
C31 C41 1.544(4) . ?
C31 C32 1.553(3) . ?
C32 C33 1.518(4) . ?
C32 H32A 0.9900 . ?
C32 H32B 0.9900 . ?
C33 C34 1.513(3) . ?
C33 C47 1.540(4) . ?
C33 C45 1.549(4) . ?
C34 C35 1.370(3) . ?
C35 C49 1.375(3) . ?
C35 H35 0.9500 . ?
C37 C49 1.510(3) . ?
C37 C52 1.533(3) . ?
C37 C38 1.541(3) . ?
C37 C50 1.542(4) . ?
C38 C39 1.553(3) . ?
C38 H38A 0.9900 . ?
C38 H38B 0.9900 . ?
C39 C56 1.536(4) . ?
C39 C54 1.545(3) . ?
C39 C40 1.545(3) . ?
C40 C49 1.400(3) . ?
C41 C42 1.522(4) . ?
C41 H41A 0.9900 . ?
C41 H41B 0.9900 . ?
C42 H42A 0.9800 . ?
C42 H42B 0.9800 . ?
C42 H42C 0.9800 . ?
C43 C44 1.521(4) . ?
C43 H43A 0.9900 . ?
C43 H43B 0.9900 . ?
C44 H44A 0.9800 . ?
C44 H44B 0.9800 . ?
C44 H44C 0.9800 . ?
C45 C46 1.519(4) . ?
C45 H45A 0.9900 . ?
C45 H45B 0.9900 . ?
C46 H46A 0.9800 . ?
C46 H46B 0.9800 . ?
C46 H46C 0.9800 . ?
C47 C48 1.512(4) . ?
C47 H47A 0.9900 . ?
C47 H47B 0.9900 . ?
C48 H48A 0.9800 . ?
C48 H48B 0.9800 . ?
C48 H48C 0.9800 . ?
C50 C51 1.521(4) . ?
C50 H50A 0.9900 . ?
C50 H50B 0.9900 . ?
C51 H51A 0.9800 . ?
C51 H51B 0.9800 . ?
C51 H51C 0.9800 . ?
C52 C53 1.526(4) . ?
C52 H52A 0.9900 . ?
C52 H52B 0.9900 . ?
C53 H53A 0.9800 . ?
C53 H53B 0.9800 . ?
C53 H53C 0.9800 . ?
C54 C55 1.520(3) . ?
C54 H54A 0.9900 . ?
C54 H54B 0.9900 . ?
C55 H55A 0.9800 . ?
C55 H55B 0.9800 . ?
C55 H55C 0.9800 . ?
C56 C57 1.530(4) . ?
C56 H56A 0.9900 . ?
C56 H56B 0.9900 . ?
C57 H57A 0.9800 . ?
C57 H57B 0.9800 . ?
C57 H57C 0.9800 . ?
 
loop_
 _geom_angle_atom_site_label_1
 _geom_angle_atom_site_label_2
 _geom_angle_atom_site_label_3
 _geom_angle
 _geom_angle_site_symmetry_1
 _geom_angle_site_symmetry_3
 _geom_angle_publ_flag
C1 Si1 C29 122.11(11) . . ?
C1 Si1 C13 91.62(11) . . ?
C29 Si1 C13 122.76(12) . . ?
C1 Si1 H1 100.3(8) . . ?
C29 Si1 H1 109.2(7) . . ?
C13 Si1 H1 107.8(7) . . ?
C2 C1 C12 114.9(2) . . ?
C2 C1 Si1 104.43(18) . . ?
C12 C1 Si1 140.62(18) . . ?
C6 C2 C1 124.6(2) . . ?
C6 C2 C3 112.2(2) . . ?
C1 C2 C3 123.1(2) . . ?
C2 C3 C4 100.29(19) . . ?
C2 C3 C15 109.7(2) . . ?
C4 C3 C15 113.6(2) . . ?
C2 C3 C13 103.3(2) . . ?
C4 C3 C13 118.4(2) . . ?
C15 C3 C13 110.3(2) . . ?
C3 C4 C5 107.4(2) . . ?
C3 C4 H4A 110.2 . . ?
C5 C4 H4A 110.2 . . ?
C3 C4 H4B 110.2 . . ?
C5 C4 H4B 110.2 . . ?
H4A C4 H4B 108.5 . . ?
C6 C5 C19 109.3(2) . . ?
C6 C5 C17 111.4(2) . . ?
C19 C5 C17 109.1(2) . . ?
C6 C5 C4 101.1(2) . . ?
C19 C5 C4 112.5(2) . . ?
C17 C5 C4 113.2(2) . . ?
C7 C6 C2 118.9(2) . . ?
C7 C6 C5 130.2(2) . . ?
C2 C6 C5 110.9(2) . . ?
C6 C7 C8 118.6(2) . . ?
C6 C7 H7 120.7 . . ?
C8 C7 H7 120.7 . . ?
C12 C8 C7 121.5(2) . . ?
C12 C8 C9 113.3(2) . . ?
C7 C8 C9 125.1(2) . . ?
C8 C9 C23 112.7(2) . . ?
C8 C9 C21 108.6(2) . . ?
C23 C9 C21 109.0(2) . . ?
C8 C9 C10 101.80(19) . . ?
C23 C9 C10 112.4(2) . . ?
C21 C9 C10 112.1(2) . . ?
C9 C10 C11 108.49(19) . . ?
C9 C10 H10A 110.0 . . ?
C11 C10 H10A 110.0 . . ?
C9 C10 H10B 110.0 . . ?
C11 C10 H10B 110.0 . . ?
H10A C10 H10B 108.4 . . ?
C12 C11 C27 111.2(2) . . ?
C12 C11 C25 111.2(2) . . ?
C27 C11 C25 108.24(19) . . ?
C12 C11 C10 102.78(18) . . ?
C27 C11 C10 112.3(2) . . ?
C25 C11 C10 111.1(2) . . ?
C8 C12 C1 121.0(2) . . ?
C8 C12 C11 110.3(2) . . ?
C1 C12 C11 128.7(2) . . ?
C14 C13 C3 118.0(2) . . ?
C14 C13 Si1 117.5(2) . . ?
C3 C13 Si1 101.68(18) . . ?
C14 C13 H13 106.3 . . ?
C3 C13 H13 106.3 . . ?
Si1 C13 H13 106.3 . . ?
C13 C14 H14A 109.5 . . ?
C13 C14 H14B 109.5 . . ?
H14A C14 H14B 109.5 . . ?
C13 C14 H14C 109.5 . . ?
H14A C14 H14C 109.5 . . ?
H14B C14 H14C 109.5 . . ?
C16 C15 C3 117.4(2) . . ?
C16 C15 H15A 108.0 . . ?
C3 C15 H15A 108.0 . . ?
C16 C15 H15B 108.0 . . ?
C3 C15 H15B 108.0 . . ?
H15A C15 H15B 107.2 . . ?
C15 C16 H16A 109.5 . . ?
C15 C16 H16B 109.5 . . ?
H16A C16 H16B 109.5 . . ?
C15 C16 H16C 109.5 . . ?
H16A C16 H16C 109.5 . . ?
H16B C16 H16C 109.5 . . ?
C18 C17 C5 117.0(2) . . ?
C18 C17 H17A 108.1 . . ?
C5 C17 H17A 108.1 . . ?
C18 C17 H17B 108.1 . . ?
C5 C17 H17B 108.1 . . ?
H17A C17 H17B 107.3 . . ?
C17 C18 H18A 109.5 . . ?
C17 C18 H18B 109.5 . . ?
H18A C18 H18B 109.5 . . ?
C17 C18 H18C 109.5 . . ?
H18A C18 H18C 109.5 . . ?
H18B C18 H18C 109.5 . . ?
C20 C19 C5 116.6(2) . . ?
C20 C19 H19A 108.1 . . ?
C5 C19 H19A 108.1 . . ?
C20 C19 H19B 108.1 . . ?
C5 C19 H19B 108.1 . . ?
H19A C19 H19B 107.3 . . ?
C19 C20 H20A 109.5 . . ?
C19 C20 H20B 109.5 . . ?
H20A C20 H20B 109.5 . . ?
C19 C20 H20C 109.5 . . ?
H20A C20 H20C 109.5 . . ?
H20B C20 H20C 109.5 . . ?
C22 C21 C9 115.7(3) . . ?
C22 C21 H21A 108.4 . . ?
C9 C21 H21A 108.4 . . ?
C22 C21 H21B 108.4 . . ?
C9 C21 H21B 108.4 . . ?
H21A C21 H21B 107.4 . . ?
C21 C22 H22A 109.5 . . ?
C21 C22 H22B 109.5 . . ?
H22A C22 H22B 109.5 . . ?
C21 C22 H22C 109.5 . . ?
H22A C22 H22C 109.5 . . ?
H22B C22 H22C 109.5 . . ?
C24 C23 C9 116.5(2) . . ?
C24 C23 H23A 108.2 . . ?
C9 C23 H23A 108.2 . . ?
C24 C23 H23B 108.2 . . ?
C9 C23 H23B 108.2 . . ?
H23A C23 H23B 107.3 . . ?
C23 C24 H24A 109.5 . . ?
C23 C24 H24B 109.5 . . ?
H24A C24 H24B 109.5 . . ?
C23 C24 H24C 109.5 . . ?
H24A C24 H24C 109.5 . . ?
H24B C24 H24C 109.5 . . ?
C26 C25 C11 115.7(2) . . ?
C26 C25 H25A 108.4 . . ?
C11 C25 H25A 108.4 . . ?
C26 C25 H25B 108.4 . . ?
C11 C25 H25B 108.4 . . ?
H25A C25 H25B 107.4 . . ?
C25 C26 H26A 109.5 . . ?
C25 C26 H26B 109.5 . . ?
H26A C26 H26B 109.5 . . ?
C25 C26 H26C 109.5 . . ?
H26A C26 H26C 109.5 . . ?
H26B C26 H26C 109.5 . . ?
C28 C27 C11 116.2(2) . . ?
C28 C27 H27A 108.2 . . ?
C11 C27 H27A 108.2 . . ?
C28 C27 H27B 108.2 . . ?
C11 C27 H27B 108.2 . . ?
H27A C27 H27B 107.4 . . ?
C27 C28 H28A 109.5 . . ?
C27 C28 H28B 109.5 . . ?
H28A C28 H28B 109.5 . . ?
C27 C28 H28C 109.5 . . ?
H28A C28 H28C 109.5 . . ?
H28B C28 H28C 109.5 . . ?
C40 C29 C30 116.3(2) . . ?
C40 C29 Si1 124.06(17) . . ?
C30 C29 Si1 119.40(18) . . ?
C34 C30 C29 120.1(2) . . ?
C34 C30 C31 108.2(2) . . ?
C29 C30 C31 131.6(2) . . ?
C43 C31 C41 110.0(2) . . ?
C43 C31 C32 107.6(2) . . ?
C41 C31 C32 110.7(2) . . ?
C43 C31 C30 115.4(2) . . ?
C41 C31 C30 111.3(2) . . ?
C32 C31 C30 101.4(2) . . ?
C33 C32 C31 109.34(19) . . ?
C33 C32 H32A 109.8 . . ?
C31 C32 H32A 109.8 . . ?
C33 C32 H32B 109.8 . . ?
C31 C32 H32B 109.8 . . ?
H32A C32 H32B 108.3 . . ?
C34 C33 C32 100.8(2) . . ?
C34 C33 C47 113.0(2) . . ?
C32 C33 C47 112.6(2) . . ?
C34 C33 C45 108.1(2) . . ?
C32 C33 C45 114.0(2) . . ?
C47 C33 C45 108.3(2) . . ?
C35 C34 C30 121.7(2) . . ?
C35 C34 C33 124.4(2) . . ?
C30 C34 C33 113.9(2) . . ?
C34 C35 C49 119.3(2) . . ?
C34 C35 H35 120.4 . . ?
C49 C35 H35 120.4 . . ?
C49 C37 C52 112.5(2) . . ?
C49 C37 C38 102.15(19) . . ?
C52 C37 C38 111.8(2) . . ?
C49 C37 C50 109.5(2) . . ?
C52 C37 C50 111.2(2) . . ?
C38 C37 C50 109.3(2) . . ?
C37 C38 C39 109.4(2) . . ?
C37 C38 H38A 109.8 . . ?
C39 C38 H38A 109.8 . . ?
C37 C38 H38B 109.8 . . ?
C39 C38 H38B 109.8 . . ?
H38A C38 H38B 108.3 . . ?
C56 C39 C54 111.0(2) . . ?
C56 C39 C40 110.26(19) . . ?
C54 C39 C40 112.9(2) . . ?
C56 C39 C38 109.1(2) . . ?
C54 C39 C38 109.3(2) . . ?
C40 C39 C38 103.95(19) . . ?
C49 C40 C29 121.3(2) . . ?
C49 C40 C39 108.5(2) . . ?
C29 C40 C39 129.8(2) . . ?
C42 C41 C31 115.9(2) . . ?
C42 C41 H41A 108.3 . . ?
C31 C41 H41A 108.3 . . ?
C42 C41 H41B 108.3 . . ?
C31 C41 H41B 108.3 . . ?
H41A C41 H41B 107.4 . . ?
C41 C42 H42A 109.5 . . ?
C41 C42 H42B 109.5 . . ?
H42A C42 H42B 109.5 . . ?
C41 C42 H42C 109.5 . . ?
H42A C42 H42C 109.5 . . ?
H42B C42 H42C 109.5 . . ?
C44 C43 C31 115.4(2) . . ?
C44 C43 H43A 108.4 . . ?
C31 C43 H43A 108.4 . . ?
C44 C43 H43B 108.4 . . ?
C31 C43 H43B 108.4 . . ?
H43A C43 H43B 107.5 . . ?
C43 C44 H44A 109.5 . . ?
C43 C44 H44B 109.5 . . ?
H44A C44 H44B 109.5 . . ?
C43 C44 H44C 109.5 . . ?
H44A C44 H44C 109.5 . . ?
H44B C44 H44C 109.5 . . ?
C46 C45 C33 116.0(2) . . ?
C46 C45 H45A 108.3 . . ?
C33 C45 H45A 108.3 . . ?
C46 C45 H45B 108.3 . . ?
C33 C45 H45B 108.3 . . ?
H45A C45 H45B 107.4 . . ?
C45 C46 H46A 109.5 . . ?
C45 C46 H46B 109.5 . . ?
H46A C46 H46B 109.5 . . ?
C45 C46 H46C 109.5 . . ?
H46A C46 H46C 109.5 . . ?
H46B C46 H46C 109.5 . . ?
C48 C47 C33 116.8(2) . . ?
C48 C47 H47A 108.1 . . ?
C33 C47 H47A 108.1 . . ?
C48 C47 H47B 108.1 . . ?
C33 C47 H47B 108.1 . . ?
H47A C47 H47B 107.3 . . ?
C47 C48 H48A 109.5 . . ?
C47 C48 H48B 109.5 . . ?
H48A C48 H48B 109.5 . . ?
C47 C48 H48C 109.5 . . ?
H48A C48 H48C 109.5 . . ?
H48B C48 H48C 109.5 . . ?
C35 C49 C40 120.6(2) . . ?
C35 C49 C37 125.4(2) . . ?
C40 C49 C37 113.9(2) . . ?
C51 C50 C37 116.6(2) . . ?
C51 C50 H50A 108.1 . . ?
C37 C50 H50A 108.1 . . ?
C51 C50 H50B 108.1 . . ?
C37 C50 H50B 108.1 . . ?
H50A C50 H50B 107.3 . . ?
C50 C51 H51A 109.5 . . ?
C50 C51 H51B 109.5 . . ?
H51A C51 H51B 109.5 . . ?
C50 C51 H51C 109.5 . . ?
H51A C51 H51C 109.5 . . ?
H51B C51 H51C 109.5 . . ?
C53 C52 C37 114.4(2) . . ?
C53 C52 H52A 108.7 . . ?
C37 C52 H52A 108.7 . . ?
C53 C52 H52B 108.7 . . ?
C37 C52 H52B 108.7 . . ?
H52A C52 H52B 107.6 . . ?
C52 C53 H53A 109.5 . . ?
C52 C53 H53B 109.5 . . ?
H53A C53 H53B 109.5 . . ?
C52 C53 H53C 109.5 . . ?
H53A C53 H53C 109.5 . . ?
H53B C53 H53C 109.5 . . ?
C55 C54 C39 115.4(2) . . ?
C55 C54 H54A 108.4 . . ?
C39 C54 H54A 108.4 . . ?
C55 C54 H54B 108.4 . . ?
C39 C54 H54B 108.4 . . ?
H54A C54 H54B 107.5 . . ?
C54 C55 H55A 109.5 . . ?
C54 C55 H55B 109.5 . . ?
H55A C55 H55B 109.5 . . ?
C54 C55 H55C 109.5 . . ?
H55A C55 H55C 109.5 . . ?
H55B C55 H55C 109.5 . . ?
C57 C56 C39 115.3(2) . . ?
C57 C56 H56A 108.4 . . ?
C39 C56 H56A 108.4 . . ?
C57 C56 H56B 108.4 . . ?
C39 C56 H56B 108.4 . . ?
H56A C56 H56B 107.5 . . ?
C56 C57 H57A 109.5 . . ?
C56 C57 H57B 109.5 . . ?
H57A C57 H57B 109.5 . . ?
C56 C57 H57C 109.5 . . ?
H57A C57 H57C 109.5 . . ?
H57B C57 H57C 109.5 . . ?
 
loop_
 _geom_torsion_atom_site_label_1
 _geom_torsion_atom_site_label_2
 _geom_torsion_atom_site_label_3
 _geom_torsion_atom_site_label_4
 _geom_torsion
 _geom_torsion_site_symmetry_1
 _geom_torsion_site_symmetry_2
 _geom_torsion_site_symmetry_3
 _geom_torsion_site_symmetry_4
 _geom_torsion_publ_flag
C29 Si1 C1 C2 146.99(17) . . . . ?
C13 Si1 C1 C2 15.94(19) . . . . ?
C29 Si1 C1 C12 -30.3(3) . . . . ?
C13 Si1 C1 C12 -161.3(3) . . . . ?
C12 C1 C2 C6 8.7(4) . . . . ?
Si1 C1 C2 C6 -169.4(2) . . . . ?
C12 C1 C2 C3 -174.4(2) . . . . ?
Si1 C1 C2 C3 7.5(3) . . . . ?
C6 C2 C3 C4 21.2(3) . . . . ?
C1 C2 C3 C4 -156.1(2) . . . . ?
C6 C2 C3 C15 -98.6(3) . . . . ?
C1 C2 C3 C15 84.2(3) . . . . ?
C6 C2 C3 C13 143.9(2) . . . . ?
C1 C2 C3 C13 -33.4(3) . . . . ?
C2 C3 C4 C5 -28.3(3) . . . . ?
C15 C3 C4 C5 88.6(3) . . . . ?
C13 C3 C4 C5 -139.6(2) . . . . ?
C3 C4 C5 C6 25.5(3) . . . . ?
C3 C4 C5 C19 -90.9(3) . . . . ?
C3 C4 C5 C17 144.8(2) . . . . ?
C1 C2 C6 C7 -6.0(4) . . . . ?
C3 C2 C6 C7 176.7(2) . . . . ?
C1 C2 C6 C5 171.5(2) . . . . ?
C3 C2 C6 C5 -5.7(3) . . . . ?
C19 C5 C6 C7 -76.3(4) . . . . ?
C17 C5 C6 C7 44.3(4) . . . . ?
C4 C5 C6 C7 164.8(3) . . . . ?
C19 C5 C6 C2 106.4(3) . . . . ?
C17 C5 C6 C2 -132.9(2) . . . . ?
C4 C5 C6 C2 -12.4(3) . . . . ?
C2 C6 C7 C8 -0.6(4) . . . . ?
C5 C6 C7 C8 -177.6(2) . . . . ?
C6 C7 C8 C12 4.0(4) . . . . ?
C6 C7 C8 C9 -178.1(2) . . . . ?
C12 C8 C9 C23 -133.7(2) . . . . ?
C7 C8 C9 C23 48.2(3) . . . . ?
C12 C8 C9 C21 105.3(3) . . . . ?
C7 C8 C9 C21 -72.8(3) . . . . ?
C12 C8 C9 C10 -13.1(3) . . . . ?
C7 C8 C9 C10 168.9(2) . . . . ?
C8 C9 C10 C11 18.1(3) . . . . ?
C23 C9 C10 C11 139.0(2) . . . . ?
C21 C9 C10 C11 -97.8(2) . . . . ?
C9 C10 C11 C12 -16.8(3) . . . . ?
C9 C10 C11 C27 -136.4(2) . . . . ?
C9 C10 C11 C25 102.2(2) . . . . ?
C7 C8 C12 C1 -1.0(4) . . . . ?
C9 C8 C12 C1 -179.2(2) . . . . ?
C7 C8 C12 C11 -179.0(2) . . . . ?
C9 C8 C12 C11 2.8(3) . . . . ?
C2 C1 C12 C8 -5.0(4) . . . . ?
Si1 C1 C12 C8 172.1(2) . . . . ?
C2 C1 C12 C11 172.6(2) . . . . ?
Si1 C1 C12 C11 -10.3(5) . . . . ?
C27 C11 C12 C8 129.1(2) . . . . ?
C25 C11 C12 C8 -110.2(2) . . . . ?
C10 C11 C12 C8 8.7(3) . . . . ?
C27 C11 C12 C1 -48.7(3) . . . . ?
C25 C11 C12 C1 72.0(3) . . . . ?
C10 C11 C12 C1 -169.0(2) . . . . ?
C2 C3 C13 C14 168.8(2) . . . . ?
C4 C3 C13 C14 -81.6(3) . . . . ?
C15 C3 C13 C14 51.6(3) . . . . ?
C2 C3 C13 Si1 38.8(2) . . . . ?
C4 C3 C13 Si1 148.43(19) . . . . ?
C15 C3 C13 Si1 -78.4(2) . . . . ?
C2 C3 C15 C16 157.1(2) . . . . ?
C4 C3 C15 C16 45.8(3) . . . . ?
C13 C3 C15 C16 -89.8(3) . . . . ?
C6 C5 C17 C18 50.1(3) . . . . ?
C19 C5 C17 C18 170.9(2) . . . . ?
C4 C5 C17 C18 -63.0(3) . . . . ?
C6 C5 C19 C20 -175.8(2) . . . . ?
C17 C5 C19 C20 62.2(3) . . . . ?
C4 C5 C19 C20 -64.3(3) . . . . ?
C8 C9 C21 C22 177.3(2) . . . . ?
C23 C9 C21 C22 54.1(3) . . . . ?
C10 C9 C21 C22 -71.0(3) . . . . ?
C8 C9 C23 C24 45.3(3) . . . . ?
C21 C9 C23 C24 166.0(2) . . . . ?
C10 C9 C23 C24 -69.1(3) . . . . ?
C12 C11 C25 C26 -174.8(2) . . . . ?
C27 C11 C25 C26 -52.4(3) . . . . ?
C10 C11 C25 C26 71.4(3) . . . . ?
C12 C11 C27 C28 -48.5(3) . . . . ?
C25 C11 C27 C28 -170.9(2) . . . . ?
C10 C11 C27 C28 66.0(3) . . . . ?
C40 C29 C30 C34 5.5(4) . . . . ?
Si1 C29 C30 C34 -169.5(2) . . . . ?
C40 C29 C30 C31 -171.8(2) . . . . ?
Si1 C29 C30 C31 13.1(4) . . . . ?
C34 C30 C31 C43 -128.4(2) . . . . ?
C29 C30 C31 C43 49.1(4) . . . . ?
C34 C30 C31 C41 105.2(3) . . . . ?
C29 C30 C31 C41 -77.2(3) . . . . ?
C34 C30 C31 C32 -12.6(3) . . . . ?
C29 C30 C31 C32 165.0(3) . . . . ?
C43 C31 C32 C33 145.4(2) . . . . ?
C41 C31 C32 C33 -94.4(2) . . . . ?
C30 C31 C32 C33 23.9(3) . . . . ?
C31 C32 C33 C34 -25.2(3) . . . . ?
C31 C32 C33 C47 -145.8(2) . . . . ?
C31 C32 C33 C45 90.4(3) . . . . ?
C29 C30 C34 C35 1.3(4) . . . . ?
C31 C30 C34 C35 179.2(2) . . . . ?
C29 C30 C34 C33 179.2(2) . . . . ?
C31 C30 C34 C33 -2.9(3) . . . . ?
C32 C33 C34 C35 -164.8(3) . . . . ?
C47 C33 C34 C35 -44.4(3) . . . . ?
C45 C33 C34 C35 75.3(3) . . . . ?
C32 C33 C34 C30 17.4(3) . . . . ?
C47 C33 C34 C30 137.8(2) . . . . ?
C45 C33 C34 C30 -102.5(3) . . . . ?
C30 C34 C35 C49 -5.0(4) . . . . ?
C33 C34 C35 C49 177.4(2) . . . . ?
C49 C37 C38 C39 11.6(3) . . . . ?
C52 C37 C38 C39 132.1(2) . . . . ?
C50 C37 C38 C39 -104.3(2) . . . . ?
C37 C38 C39 C56 -122.5(2) . . . . ?
C37 C38 C39 C54 115.9(2) . . . . ?
C37 C38 C39 C40 -4.9(3) . . . . ?
C30 C29 C40 C49 -8.9(4) . . . . ?
Si1 C29 C40 C49 165.9(2) . . . . ?
C30 C29 C40 C39 162.9(2) . . . . ?
Si1 C29 C40 C39 -22.3(4) . . . . ?
C56 C39 C40 C49 112.3(2) . . . . ?
C54 C39 C40 C49 -122.9(2) . . . . ?
C38 C39 C40 C49 -4.5(3) . . . . ?
C56 C39 C40 C29 -60.3(3) . . . . ?
C54 C39 C40 C29 64.5(3) . . . . ?
C38 C39 C40 C29 -177.1(2) . . . . ?
C43 C31 C41 C42 58.6(3) . . . . ?
C32 C31 C41 C42 -60.2(3) . . . . ?
C30 C31 C41 C42 -172.1(2) . . . . ?
C41 C31 C43 C44 162.5(2) . . . . ?
C32 C31 C43 C44 -76.9(3) . . . . ?
C30 C31 C43 C44 35.4(3) . . . . ?
C34 C33 C45 C46 172.5(3) . . . . ?
C32 C33 C45 C46 61.3(3) . . . . ?
C47 C33 C45 C46 -64.8(3) . . . . ?
C34 C33 C47 C48 -52.9(3) . . . . ?
C32 C33 C47 C48 60.5(3) . . . . ?
C45 C33 C47 C48 -172.5(2) . . . . ?
C34 C35 C49 C40 1.6(4) . . . . ?
C34 C35 C49 C37 -179.2(2) . . . . ?
C29 C40 C49 C35 5.6(4) . . . . ?
C39 C40 C49 C35 -167.8(2) . . . . ?
C29 C40 C49 C37 -173.7(2) . . . . ?
C39 C40 C49 C37 12.9(3) . . . . ?
C52 C37 C49 C35 45.4(3) . . . . ?
C38 C37 C49 C35 165.4(2) . . . . ?
C50 C37 C49 C35 -78.8(3) . . . . ?
C52 C37 C49 C40 -135.4(2) . . . . ?
C38 C37 C49 C40 -15.4(3) . . . . ?
C50 C37 C49 C40 100.4(3) . . . . ?
C49 C37 C50 C51 67.4(3) . . . . ?
C52 C37 C50 C51 -57.6(3) . . . . ?
C38 C37 C50 C51 178.5(2) . . . . ?
C49 C37 C52 C53 -179.9(2) . . . . ?
C38 C37 C52 C53 65.8(3) . . . . ?
C50 C37 C52 C53 -56.7(3) . . . . ?
C56 C39 C54 C55 -51.0(3) . . . . ?
C40 C39 C54 C55 -175.4(2) . . . . ?
C38 C39 C54 C55 69.4(3) . . . . ?
C54 C39 C56 C57 -174.6(2) . . . . ?
C40 C39 C56 C57 -48.7(3) . . . . ?
C38 C39 C56 C57 64.9(3) . . . . ?
 
_refine_diff_density_max    0.904
_refine_diff_density_min   -0.371
_refine_diff_density_rms    0.058

_shelx_res_file
;
TITL Cyclic
    exp_4641.res
    created by SHELXL-2019/3 at 14:44:37 on 29-Feb-2024
REM Old TITL exp_4641 in P-1
REM SHELXT solution in P-1: R1 0.196, Rweak 0.012, Alpha 0.056
REM <I/s>   0.000 for    0 systematic absences,  Orientation as input
REM Formula found by SHELXT:  C56 Si
CELL 0.71073 10.1298 10.1400 24.4558 84.557 85.566 78.612
ZERR 2 0.0006 0.0006 0.0013 0.005 0.005 0.005
LATT 1
SFAC C H Si
UNIT 112 180 2
TEMP -173
SIZE 0.04 0.09 0.26
L.S. 10
LIST 4
FMAP 2
PLAN 10
BOND $H
CONF
ACTA
WGHT    0.058800
FVAR       0.53521
SI1   3    0.393438    0.547590    0.765203    11.00000    0.02820    0.02259 =
         0.01937    0.00041   -0.00051   -0.00672
H1    2    0.319871    0.674698    0.789401    11.00000    0.00705
C1    1    0.364051    0.418048    0.823284    11.00000    0.02372    0.02091 =
         0.01926   -0.00129   -0.00200   -0.00535
C2    1    0.475686    0.403316    0.854623    11.00000    0.02622    0.02658 =
         0.01863   -0.00172    0.00107   -0.00639
C3    1    0.579830    0.491993    0.844433    11.00000    0.02796    0.02998 =
         0.02451    0.00034    0.00205   -0.00783
C4    1    0.702128    0.397791    0.870164    11.00000    0.02530    0.03792 =
         0.03368   -0.00183    0.00067   -0.00934
AFIX  23
H4A   2    0.759773    0.451441    0.885694    11.00000   -1.20000
H4B   2    0.756928    0.343658    0.841884    11.00000   -1.20000
AFIX   0
C5    1    0.646029    0.303166    0.916626    11.00000    0.02166    0.03945 =
         0.02286    0.00107   -0.00256   -0.00849
C6    1    0.508009    0.302852    0.896888    11.00000    0.02643    0.03275 =
         0.01939   -0.00019   -0.00306   -0.00616
C7    1    0.419177    0.218426    0.912772    11.00000    0.02732    0.02804 =
         0.02605    0.00748   -0.00338   -0.00469
AFIX  43
H7    2    0.439021    0.148363    0.941279    11.00000   -1.20000
AFIX   0
C8    1    0.298783    0.237640    0.886125    11.00000    0.02681    0.02524 =
         0.02422   -0.00003   -0.00126   -0.00694
C9    1    0.189431    0.156608    0.899759    11.00000    0.02684    0.02775 =
         0.02798    0.00653   -0.00452   -0.01046
C10   1    0.072910    0.240055    0.866401    11.00000    0.02504    0.02862 =
         0.02355    0.00291   -0.00294   -0.00708
AFIX  23
H10A  2    0.005855    0.294082    0.891145    11.00000   -1.20000
H10B  2    0.027064    0.178970    0.848784    11.00000   -1.20000
AFIX   0
C11   1    0.132871    0.334758    0.821800    11.00000    0.02179    0.02039 =
         0.02238    0.00083   -0.00314   -0.00381
C12   1    0.271636    0.334255    0.842101    11.00000    0.02313    0.02632 =
         0.01929   -0.00227   -0.00202   -0.00492
C13   1    0.584697    0.524310    0.780294    11.00000    0.04714    0.03177 =
         0.03018   -0.00371    0.00893   -0.01177
AFIX  13
H13   2    0.631150    0.439082    0.764130    11.00000   -1.20000
AFIX   0
C14   1    0.659717    0.632478    0.756105    11.00000    0.04164    0.05125 =
         0.04283    0.00350   -0.00114   -0.00941
AFIX 137
H14A  2    0.664131    0.634816    0.715861    11.00000   -1.50000
H14B  2    0.751359    0.612811    0.768955    11.00000   -1.50000
H14C  2    0.612489    0.720210    0.767756    11.00000   -1.50000
AFIX   0
C15   1    0.530874    0.624142    0.873857    11.00000    0.03449    0.03262 =
         0.02884   -0.00772   -0.00152   -0.01069
AFIX  23
H15A  2    0.466516    0.686284    0.850331    11.00000   -1.20000
H15B  2    0.480219    0.601435    0.908592    11.00000   -1.20000
AFIX   0
C16   1    0.638218    0.700471    0.887571    11.00000    0.04165    0.03899 =
         0.04955   -0.00768   -0.01458   -0.01095
AFIX 137
H16A  2    0.695302    0.716612    0.854360    11.00000   -1.50000
H16B  2    0.693912    0.646727    0.915833    11.00000   -1.50000
H16C  2    0.594327    0.787059    0.901323    11.00000   -1.50000
AFIX   0
C17   1    0.731506    0.160350    0.921778    11.00000    0.02319    0.04647 =
         0.03819    0.01207   -0.00549   -0.00742
AFIX  23
H17A  2    0.824072    0.167617    0.929687    11.00000   -1.20000
H17B  2    0.694334    0.109791    0.954023    11.00000   -1.20000
AFIX   0
C18   1    0.741236    0.077576    0.872651    11.00000    0.03556    0.03235 =
         0.05239    0.00255   -0.00008   -0.00407
AFIX 137
H18A  2    0.650588    0.068429    0.864251    11.00000   -1.50000
H18B  2    0.795927   -0.012114    0.881174    11.00000   -1.50000
H18C  2    0.783483    0.122902    0.840770    11.00000   -1.50000
AFIX   0
C19   1    0.629671    0.361398    0.972770    11.00000    0.02975    0.06497 =
         0.02805   -0.00526   -0.00522   -0.01066
AFIX  23
H19A  2    0.568675    0.450627    0.969425    11.00000   -1.20000
H19B  2    0.584392    0.301864    0.999127    11.00000   -1.20000
AFIX   0
C20   1    0.758798    0.378951    0.997383    11.00000    0.04310    0.06824 =
         0.03503    0.00082   -0.01215   -0.01379
AFIX 137
H20A  2    0.804514    0.438919    0.972167    11.00000   -1.50000
H20B  2    0.818607    0.290809    1.002982    11.00000   -1.50000
H20C  2    0.736016    0.418374    1.032772    11.00000   -1.50000
AFIX   0
C21   1    0.239090    0.014602    0.879282    11.00000    0.03616    0.02845 =
         0.04744    0.00578   -0.00976   -0.00847
AFIX  23
H21A  2    0.257575    0.024744    0.838912    11.00000   -1.20000
H21B  2    0.325575   -0.025634    0.895830    11.00000   -1.20000
AFIX   0
C22   1    0.142843   -0.083683    0.892051    11.00000    0.06123    0.03747 =
         0.06714    0.01048   -0.01505   -0.02419
AFIX 137
H22A  2    0.054893   -0.043260    0.877773    11.00000   -1.50000
H22B  2    0.132157   -0.103605    0.931968    11.00000   -1.50000
H22C  2    0.179538   -0.167434    0.874629    11.00000   -1.50000
AFIX   0
C23   1    0.150555    0.142183    0.961846    11.00000    0.03058    0.04738 =
         0.03236    0.01439   -0.00627   -0.01394
AFIX  23
H23A  2    0.065750    0.106690    0.966959    11.00000   -1.20000
H23B  2    0.221519    0.073790    0.979582    11.00000   -1.20000
AFIX   0
C24   1    0.131187    0.268806    0.991772    11.00000    0.03888    0.06479 =
         0.02778   -0.00164   -0.00014   -0.01435
AFIX 137
H24A  2    0.215957    0.302391    0.989220    11.00000   -1.50000
H24B  2    0.104318    0.248498    1.030536    11.00000   -1.50000
H24C  2    0.060713    0.337724    0.974986    11.00000   -1.50000
AFIX   0
C25   1    0.144885    0.278771    0.764566    11.00000    0.02767    0.02838 =
         0.02409   -0.00185    0.00000   -0.00867
AFIX  23
H25A  2    0.202410    0.329194    0.739484    11.00000   -1.20000
H25B  2    0.191746    0.183239    0.768132    11.00000   -1.20000
AFIX   0
C26   1    0.012387    0.286081    0.738028    11.00000    0.03644    0.03895 =
         0.02780   -0.00387   -0.00556   -0.01388
AFIX 137
H26A  2   -0.027919    0.380696    0.728342    11.00000   -1.50000
H26B  2   -0.049558    0.245024    0.763945    11.00000   -1.50000
H26C  2    0.029286    0.237233    0.704703    11.00000   -1.50000
AFIX   0
C27   1    0.047717    0.477826    0.817443    11.00000    0.02374    0.02490 =
         0.02846    0.00112   -0.00079   -0.00606
AFIX  23
H27A  2    0.083530    0.528978    0.785051    11.00000   -1.20000
H27B  2   -0.045628    0.471334    0.810394    11.00000   -1.20000
AFIX   0
C28   1    0.042091    0.559013    0.867505    11.00000    0.03296    0.02991 =
         0.03561   -0.00340    0.00311   -0.00538
AFIX 137
H28A  2    0.133721    0.566727    0.875112    11.00000   -1.50000
H28B  2    0.001136    0.512952    0.899525    11.00000   -1.50000
H28C  2   -0.012187    0.649354    0.859936    11.00000   -1.50000
AFIX   0
C29   1    0.334434    0.543132    0.693247    11.00000    0.03064    0.01915 =
         0.02029    0.00116   -0.00072   -0.00482
C30   1    0.234716    0.650856    0.671946    11.00000    0.02800    0.02097 =
         0.01875   -0.00021    0.00123   -0.00747
C31   1    0.176526    0.794144    0.691783    11.00000    0.03032    0.01748 =
         0.02908   -0.00244    0.00112   -0.00317
C32   1    0.103925    0.866156    0.640359    11.00000    0.02778    0.02332 =
         0.03169    0.00106    0.00071   -0.00037
AFIX  23
H32A  2    0.020670    0.928659    0.652007    11.00000   -1.20000
H32B  2    0.163512    0.919456    0.617866    11.00000   -1.20000
AFIX   0
C33   1    0.068773    0.761281    0.606501    11.00000    0.02891    0.02536 =
         0.03077    0.00279   -0.00344   -0.00328
C34   1    0.174152    0.639333    0.623388    11.00000    0.02917    0.01985 =
         0.02459    0.00231   -0.00170   -0.00545
C35   1    0.206429    0.524721    0.595787    11.00000    0.03360    0.02870 =
         0.02150    0.00009   -0.00419   -0.00833
AFIX  43
H35   2    0.159175    0.516172    0.564632    11.00000   -1.20000
AFIX   0
C37   1    0.356000    0.291184    0.587280    11.00000    0.03913    0.02065 =
         0.02134   -0.00142   -0.00241   -0.00420
C38   1    0.491023    0.235670    0.613893    11.00000    0.03446    0.02323 =
         0.02818   -0.00515    0.00198   -0.00562
AFIX  23
H38A  2    0.566938    0.241505    0.586310    11.00000   -1.20000
H38B  2    0.495758    0.139664    0.627228    11.00000   -1.20000
AFIX   0
C39   1    0.502248    0.319293    0.662760    11.00000    0.02762    0.02068 =
         0.02367   -0.00165    0.00005   -0.00195
C40   1    0.375687    0.432817    0.660376    11.00000    0.03037    0.01672 =
         0.02169    0.00269   -0.00127   -0.00494
C41   1    0.074768    0.786930    0.741843    11.00000    0.03706    0.02576 =
         0.03098   -0.00380    0.00483   -0.00424
AFIX  23
H41A  2    0.008581    0.733272    0.733066    11.00000   -1.20000
H41B  2    0.124123    0.737587    0.773308    11.00000   -1.20000
AFIX   0
C42   1   -0.002324    0.921893    0.759895    11.00000    0.05149    0.03786 =
         0.04029   -0.00842    0.01070    0.00381
AFIX 137
H42A  2    0.061548    0.975213    0.770011    11.00000   -1.50000
H42B  2   -0.063951    0.906362    0.791711    11.00000   -1.50000
H42C  2   -0.054204    0.970997    0.729586    11.00000   -1.50000
AFIX   0
C43   1    0.282532    0.876095    0.703963    11.00000    0.03642    0.01729 =
         0.03455    0.00169   -0.00414   -0.00481
AFIX  23
H43A  2    0.240344    0.973072    0.701155    11.00000   -1.20000
H43B  2    0.307688    0.851170    0.742425    11.00000   -1.20000
AFIX   0
C44   1    0.410674    0.856840    0.666469    11.00000    0.03889    0.02273 =
         0.05186    0.00312    0.00205   -0.00918
AFIX 137
H44A  2    0.387081    0.874734    0.628000    11.00000   -1.50000
H44B  2    0.460173    0.763867    0.672518    11.00000   -1.50000
H44C  2    0.467329    0.919514    0.674734    11.00000   -1.50000
AFIX   0
C45   1   -0.072214    0.726607    0.622339    11.00000    0.03184    0.04107 =
         0.04228   -0.00157   -0.00336   -0.00733
AFIX  23
H45A  2   -0.084138    0.654181    0.599793    11.00000   -1.20000
H45B  2   -0.074011    0.689850    0.661308    11.00000   -1.20000
AFIX   0
C46   1   -0.191570    0.842563    0.615309    11.00000    0.03322    0.05885 =
         0.07923   -0.01213   -0.00540    0.00336
AFIX 137
H46A  2   -0.192780    0.878845    0.576717    11.00000   -1.50000
H46B  2   -0.183515    0.913737    0.638601    11.00000   -1.50000
H46C  2   -0.275437    0.809935    0.626074    11.00000   -1.50000
AFIX   0
C47   1    0.077476    0.802097    0.544226    11.00000    0.03957    0.03391 =
         0.03129    0.00496   -0.00698   -0.00089
AFIX  23
H47A  2    0.049233    0.731515    0.525021    11.00000   -1.20000
H47B  2    0.011334    0.886785    0.536969    11.00000   -1.20000
AFIX   0
C48   1    0.213365    0.823118    0.518819    11.00000    0.05191    0.04020 =
         0.02985    0.00373    0.00301   -0.00406
AFIX 137
H48A  2    0.208503    0.841158    0.478869    11.00000   -1.50000
H48B  2    0.281364    0.741777    0.526995    11.00000   -1.50000
H48C  2    0.238328    0.900049    0.534120    11.00000   -1.50000
AFIX   0
C49   1    0.307939    0.422249    0.613677    11.00000    0.02906    0.02028 =
         0.02120    0.00087   -0.00028   -0.00756
C50   1    0.257068    0.194943    0.604606    11.00000    0.04141    0.02129 =
         0.03228   -0.00182   -0.00529   -0.00637
AFIX  23
H50A  2    0.297966    0.104988    0.592167    11.00000   -1.20000
H50B  2    0.247694    0.185155    0.645309    11.00000   -1.20000
AFIX   0
C51   1    0.116590    0.235891    0.583196    11.00000    0.04386    0.03531 =
         0.04191    0.00361   -0.01054   -0.01478
AFIX 137
H51A  2    0.123659    0.247733    0.542907    11.00000   -1.50000
H51B  2    0.071116    0.320958    0.597826    11.00000   -1.50000
H51C  2    0.064458    0.165372    0.595056    11.00000   -1.50000
AFIX   0
C52   1    0.375077    0.312231    0.524462    11.00000    0.04861    0.03066 =
         0.02162   -0.00480    0.00146   -0.00731
AFIX  23
H52A  2    0.288163    0.358984    0.509805    11.00000   -1.20000
H52B  2    0.441160    0.372148    0.515114    11.00000   -1.20000
AFIX   0
C53   1    0.423498    0.182433    0.495875    11.00000    0.05188    0.04233 =
         0.03262   -0.00918    0.00287   -0.00710
AFIX 137
H53A  2    0.443409    0.204808    0.456625    11.00000   -1.50000
H53B  2    0.352914    0.127981    0.500305    11.00000   -1.50000
H53C  2    0.505271    0.131144    0.512336    11.00000   -1.50000
AFIX   0
C54   1    0.505373    0.227157    0.716922    11.00000    0.03393    0.02166 =
         0.02599    0.00185    0.00148    0.00136
AFIX  23
H54A  2    0.494081    0.284645    0.748133    11.00000   -1.20000
H54B  2    0.427100    0.181426    0.719276    11.00000   -1.20000
AFIX   0
C55   1    0.632624    0.120210    0.723673    11.00000    0.04148    0.02817 =
         0.03753   -0.00029   -0.00465    0.00649
AFIX 137
H55A  2    0.653118    0.071436    0.690379    11.00000   -1.50000
H55B  2    0.618705    0.056688    0.755385    11.00000   -1.50000
H55C  2    0.708067    0.163573    0.729608    11.00000   -1.50000
AFIX   0
C56   1    0.630670    0.379450    0.652977    11.00000    0.03196    0.03027 =
         0.02875   -0.00437    0.00195   -0.00499
AFIX  23
H56A  2    0.642743    0.423283    0.686249    11.00000   -1.20000
H56B  2    0.708900    0.304712    0.648390    11.00000   -1.20000
AFIX   0
C57   1    0.632396    0.482578    0.603135    11.00000    0.04285    0.04353 =
         0.03929    0.00276    0.00511   -0.01643
AFIX 137
H57A  2    0.621455    0.440440    0.569748    11.00000   -1.50000
H57B  2    0.718542    0.513683    0.599763    11.00000   -1.50000
H57C  2    0.558298    0.559655    0.607975    11.00000   -1.50000
AFIX   0
HKLF 4


REM  Cyclic
REM wR2 = 0.1914, GooF = S = 1.023, Restrained GooF = 1.023 for all data
REM R1 = 0.0768 for 6257 Fo > 4sig(Fo) and 0.1496 for all 11460 data
REM 534 parameters refined using 0 restraints

END

WGHT      0.0549      0.0000

REM Highest difference peak  0.904,  deepest hole -0.371,  1-sigma level  0.058
Q1    1   0.5393  0.6010  0.7556  11.00000  0.05    0.90
Q2    1   0.6671  0.5107  0.7921  11.00000  0.05    0.66
Q3    1   0.3725  0.4712  0.7922  11.00000  0.05    0.39
Q4    1   0.4756  0.5324  0.7743  11.00000  0.05    0.34
Q5    1   0.3865  0.6654  0.7673  11.00000  0.05    0.32
Q6    1   0.3175  0.5566  0.7569  11.00000  0.05    0.32
Q7    1   0.2078  0.3350  0.8285  11.00000  0.05    0.31
Q8    1   0.2615  0.6915  0.8006  11.00000  0.05    0.30
Q9    1   0.1065  0.8053  0.6767  11.00000  0.05    0.29
Q10   1   0.2233  0.4346  0.6110  11.00000  0.05    0.29
;
_shelx_res_checksum   38279

_shelx_hkl_file
;
   0   0   4 3424.29 395.415   7
   0   0   4 4652.23 395.691   2
   0   0   5 140.813 15.7654   7
   0   0  -5 227.577 18.3594   2
   0   0   6 236.776 25.3778   7
   0   0  -6 323.222 27.6279   2
   0   0   7 160.547 17.6492   7
   0   0  -7 210.723 19.9858   2
   0   0   8 6023.95 580.432   7
   0   0  -8 5603.91 580.242   7
   0   0  -9 53.1600 7.20034   7
   0   0  -9 85.4097 10.7391   2
   0   0 -10 361.942 32.4623   2
   0   0 -10 278.247 30.0368   7
   0   0 -11 454.643 41.6288   2
   0   0 -11 376.164 39.4889   7
   0   0 -12 106.552 13.0545   2
   0   0 -12 88.7889 10.7518   7
   0   0 -13 230.932 23.2463   2
   0   0 -13 187.202 20.9596   7
   0   0 -14 557.979 54.5652   2
   0   0 -14 526.410 52.9845   7
   0   0 -15 4.30333 5.45188   2
   0   0 -15-2.26390 3.00851   7
   0   0  16 15.0961 3.83447   1
   0   0 -16 14.5341 4.08056   7
   0   0 -16 8.62266 5.61178   2
   0   0 -17 124.020 15.6125   2
   0   0  17 124.688 13.7936   1
   0   0 -17 116.357 14.1085   7
   0   0 -18 35.9900 7.86430   2
   0   0  18 41.1921 6.19599   1
   0   0 -18 34.4446 6.44430   7
   0   0 -19 338.290 36.3785   2
   0   0 -19 324.626 35.4471   7
   0   0  19 365.822 35.1560   1
   0   0 -20 21.7172 5.48312   7
   0   0  20 19.2630 4.93462   1
   0   0 -21 46.0194 8.76606   7
   0   0  21 76.8335 9.09248   1
   0   0 -22 5.22759 4.40044   7
   0   0  22 4.16396 3.85488   1
   0   0 -23 13.7835 5.29499   7
   0   0  23 8.76863 4.61457   1
   0   0 -24 1.93566 4.64691   7
   0   0  24-3.83603 3.80162   1
   0   0 -25 1.01686 4.38213   7
   0   0  25-0.80307 4.26674   1
   0   0 -26 38.5052 8.32726   7
   0   0 -27 2.24598 4.93987   7
   0   0 -28 16.4994 6.61091   7
   0   0 -29 25.9623 7.32888   7
   0   0 -30 6.49128 6.05691   7
   0   0 -31-1.36214 6.43164   7
   0   1 -31 43.5952 9.88894   7
   0   1 -30 33.6888 8.65418   7
   0   1 -29 21.8081 7.69825   7
   0   1 -28 21.9890 7.65787   7
   0   1 -27 1.16588 5.12490   7
   0  -1  27-2.91960 5.23935   1
   0   1 -26 22.1592 6.45278   7
   0  -1  26 16.8654 6.04964   1
   0   1 -25 10.5385 5.82514   7
   0  -1  25 17.1623 5.55424   1
   0   1 -24-2.00693 4.49427   7
   0  -1  24 0.86992 4.10694   1
   0   1 -23 9.53711 5.15745   7
   0  -1  23 2.50407 4.16261   1
   0   1 -22 10.8705 4.96186   7
   0  -1  22 8.77417 4.54937   1
   0   1 -21 5.14913 4.33350   7
   0  -1  21 13.6635 4.74917   1
   0   1 -20 33.3336 6.71174   7
   0  -1  20 29.5152 6.16195   1
   0  -1  19 118.451 14.2196   1
   0  -1  18 44.5017 7.08157   1
   0  -1  17 4.85891 3.64089   1
   0   1 -17 2.05295 3.46969   2
   0  -1  16 2.84408 2.94252   1
   0   1 -16-1.95756 3.42756   2
   0   1 -15 487.386 50.5867   2
   0  -1  15 549.513 51.0620   1
   0   1 -14 160.178 16.8715   2
   0  -1  14 153.820 16.9900   1
   0   1 -13 907.782 89.5650   2
   0  -1  13 955.358 89.8608   1
   0   1 -12 1049.79 105.900   2
   0  -1  12 1172.48 106.272   1
   0   1 -11 515.477 50.8634   2
   0  -1  11 531.799 51.1134   1
   0   1 -10 62.5141 7.78849   2
   0  -1  10 69.3980 8.05216   1
   0  -1   9 22.6849 3.94150   1
   0   1  -9 25.1829 4.06255   2
   0  -1   8 905.202 87.5150   1
   0   1  -8 838.123 87.0891   2
   0  -1   8 1042.99 87.6103   2
   0  -1   7-0.37714 4.62145   2
   0   1  -7 1.14827 2.14749   2
   0  -1   7 0.52878 2.02889   1
   0   1  -7 3.16577 2.59245   7
   0   1  -6 244.903 25.7572   7
   0  -1   6 277.411 25.7699   1
   0  -1   5 3184.06 301.034   7
   0   1  -5 3177.50 301.007   7
   0  -1   5 3162.48 300.950   1
   0  -1   4 44.4849 4.99469   1
   0  -1   4 40.1282 5.01396   7
   0   1  -4 43.2382 5.02276   7
   0  -1   3 598.846 57.9318   7
   0   1  -3 615.005 57.9579   7
   0  -1   2 448.896 42.9997   7
   0   1  -2 451.639 43.0212   7
   0  -1   1 1018.43 100.729   8
   0   1  -1 1066.66 100.715   8
   0  -1   1 1102.61 100.108   7
   0   1  -1 1001.42 100.168   1
   0   1  -1 1062.25 100.101   7
   0   1   0 3338.05 24.5936   8
   0  -1   0 3427.71 25.8639   8
   0   1   0 3409.52 14.3318   1
   0   1   2 5970.91 566.464   8
   0   1   2 6011.06 566.526   7
   0  -1  -2 5986.53 566.531   7
   0  -1  -3 2780.50 263.361   7
   0  -1  -4 286.366 25.6749   7
   0  -1  -4 255.605 25.6548   7
   0   1   4 264.799 25.2939   1
   0  -1  -4 257.336 25.2980   1
   0  -1  -5 1826.73 183.349   7
   0   1   5 1883.94 182.988   1
   0   1   5 1877.61 183.446   7
   0   1   6 433.874 42.4343   7
   0  -1  -6 428.924 42.3394   7
   0   1   6 426.683 41.8888   1
   0  -1  -6 528.112 44.0581   2
   0  -1  -7 92.0254 10.4072   7
   0   1   7 106.576 10.6659   7
   0  -1  -7 105.069 12.9499   2
   0   1   7 91.4864 9.78899   1
   0  -1  -8 467.718 48.4453   7
   0   1   8 502.415 48.6742   7
   0  -1  -8 625.698 52.1441   2
   0  -1  -9 273.115 29.0123   7
   0  -1  -9 410.729 34.9468   2
   0  -1 -10 1.08436 2.45847   7
   0  -1 -10 12.4905 10.0091   2
   0  -1 -11 72.0553 8.99171   7
   0  -1 -11 115.833 16.6528   2
   0  -1 -12 0.44179 2.69251   7
   0  -1 -12-3.02176 9.56927   2
   0  -1 -13 3.87604 2.66385   7
   0  -1 -13 1.48447 8.77835   2
   0  -1 -14 12.4000 3.88673   7
   0  -1 -14 2.94930 8.86629   2
   0  -1 -15 561.768 51.2163   2
   0  -1 -15 435.633 46.0410   7
   0  -1 -16 41.8374 11.1257   2
   0  -1 -16 36.6587 6.19810   7
   0  -1 -17 229.917 25.3255   2
   0  -1 -17 175.902 20.3422   7
   0  -1 -18 4.31392 7.94274   2
   0  -1 -18 3.34995 3.38332   7
   0  -1 -19 89.3655 14.8502   2
   0  -1 -19 90.0917 11.3970   7
   0   1  19 88.1567 10.5927   1
   0  -1 -20 3.00738 3.30650   7
   0  -1 -20 8.46736 7.88362   2
   0   1  20-0.53401 3.05549   1
   0  -1 -21 84.4143 11.8960   7
   0  -1 -21 93.0854 15.2422   2
   0   1  21 98.2799 11.3734   1
   0  -1 -22 6.73893 4.79313   7
   0   1  22 5.39314 3.58405   1
   0  -1 -23-4.44435 4.78964   7
   0   1  23-0.63418 3.75402   1
   0  -1 -24 88.1830 12.2978   7
   0  -1 -25 3.96423 4.92119   7
   0  -1 -26 4.16813 5.17431   7
   0  -1 -27-4.37766 5.00841   7
   0  -1 -28 29.8605 7.48213   7
   0  -1 -29 3.61439 5.69781   7
   0  -1 -30 1.26203 5.43995   7
   0  -1 -31 1.32144 5.22075   7
   0  -1 -32 4.16628 6.23203   7
   0  -2  28 1.12562 5.48907   1
   0  -2  27 6.52876 5.88927   1
   0  -2  26 47.2823 9.02739   1
   0  -2  25 11.1497 5.75899   1
   0  -2  24-0.97539 4.20441   1
   0  -2  23 7.49296 5.02648   1
   0  -2  22 1.80039 4.52725   1
   0  -2  21 101.168 13.3469   1
   0   2 -20 19.7302 5.76710   7
   0  -2  20 11.5895 5.34524   1
   0  -2  19 138.607 14.4959   1
   0   2 -19 90.1524 13.3926   7
   0   2 -18 2.30354 4.08016   7
   0  -2  18-0.74926 4.03345   1
   0   2 -17 84.0266 11.6392   7
   0  -2  17 104.319 12.1086   1
   0   2 -16 10.2260 4.07682   7
   0  -2  16 8.02600 3.96142   1
   0   2 -15 2.56215 3.21990   7
   0  -2  15-0.62959 3.30150   1
   0   2 -14 3.59545 3.14496   7
   0  -2  14-0.59246 3.19220   1
   0  -2  13 265.234 26.8244   1
   0   2 -13 251.594 26.6698   7
   0   2 -12 5.71276 3.04884   7
   0  -2  12 1.03167 2.64521   1
   0  -2  11 805.689 76.0741   1
   0   2 -11 761.619 75.9563   7
   0  -2  10 763.220 74.7470   1
   0   2 -10 778.571 74.7368   7
   0  -2   9 376.494 37.7173   1
   0   2  -9 384.857 37.7015   7
   0  -2   8 332.312 32.7225   1
   0   2  -8 325.340 32.5858   7
   0  -2   7 1210.63 115.364   1
   0   2  -7 1199.99 115.286   7
   0  -2   6 169.140 18.0092   1
   0   2  -6 181.941 17.9723   7
   0  -2   6 176.890 17.9028   7
   0  -2   5 8.66174 2.70387   7
   0   2  -5 15.9737 3.03899   7
   0  -2   4 230.984 23.3995   8
   0  -2   4 208.662 21.5810   7
   0   2  -4 226.555 21.7269   7
   0  -2   3 304.022 29.2811   8
   0   2  -3 263.991 27.5604   1
   0   2  -3 295.162 27.5568   7
   0  -2   3 281.716 27.4708   7
   0   2  -2 3789.55 342.951   8
   0  -2   2 3562.35 343.042   8
   0   2  -2 3567.09 341.860   1
   0  -2   2 3490.13 341.854   1
   0   2  -2 3558.67 341.713   7
   0  -2   2 3741.78 341.729   7
   0   2  -1 1653.17 157.081   7
   0  -2   1 1644.76 157.037   7
   0   2  -1 1700.61 158.257   8
   0  -2   1 1708.16 158.594   8
   0   2  -1 1678.93 157.246   1
   0  -2   1 1616.11 157.213   1
   0  -2   0 3147.31 299.229   7
   0   2   0 3094.04 299.277   7
   0  -2   0 3153.06 299.384   1
   0   2   0 3246.24 299.398   1
   0  -2   0 3150.06 300.959   8
   0   2   0 3226.35 300.570   8
   0  -2  -1 9.86460 1.85706   7
   0   2   1 9.06233 1.87913   1
   0  -2  -1 4.29840 1.67116   1
   0  -2  -1 9.70818 7.78206   8
   0   2   1 3.90438 5.67642   8
   0   2   1 9.71480 1.97222   7
   0  -2  -2 80.9262 8.09309   1
   0   2   2 84.4167 8.18420   1
   0  -2  -2 73.4371 8.97614   8
   0   2   2 82.5213 12.4387   8
   0   2   2 78.5787 8.24448   7
   0  -2  -2 77.9982 8.20219   7
   0   2   3 800.775 70.6588   7
   0  -2  -3 725.174 70.5841   7
   0  -2  -3 711.501 70.5271   8
   0   2   3 706.898 70.9312   8
   0  -2  -3 738.871 70.4115   1
   0   2   3 751.972 70.4270   1
   0   2   4 93.7943 9.18638   8
   0  -2  -4 88.6853 8.92714   1
   0   2   4 99.2364 9.32855   7
   0  -2  -4 81.6620 9.25940   7
   0   2   4 87.0078 8.92849   1
   0   2   5 1969.51 186.312   7
   0  -2  -5 1997.83 186.382   7
   0  -2  -5 1952.51 185.954   1
   0   2   5 1950.91 185.948   1
   0  -2  -6 232.626 22.1439   7
   0  -2  -6 220.520 21.9888   7
   0   2   6 220.473 21.4529   1
   0  -2  -6 219.122 21.4711   1
   0  -2  -7 1216.12 118.933   7
   0  -2  -7 1232.16 118.854   7
   0   2   7 1272.03 118.294   1
   0  -2  -7 1238.43 118.314   1
   0  -2  -8 55.8132 7.16971   7
   0  -2  -8 81.3897 10.6135   2
   0   2   8 60.2941 6.45668   1
   0  -2  -8 61.6517 7.16339   7
   0   2   9-0.17022 1.57337   1
   0  -2  -9 0.69638 2.51089   7
   0  -2  -9-4.77059 6.78124   2
   0   2  10 7.45046 1.96758   1
   0  -2 -10 1.19980 7.03100   2
   0  -2 -10 1.55118 2.67787   7
   0   2  11 200.895 19.8993   1
   0  -2 -11 252.960 26.8518   2
   0  -2 -11 188.926 20.6957   7
   0   2  12 397.120 37.7613   1
   0  -2 -12 355.742 38.3737   7
   0   2  13 187.727 18.3824   1
   0  -2 -13 162.098 18.9518   7
   0  -2 -14 59.5162 15.5301   2
   0  -2 -14 42.4561 6.44190   7
   0  -2 -15 186.249 21.5824   7
   0  -2 -15 370.647 34.1071   2
   0  -2 -16 34.6500 13.3962   2
   0  -2 -16 12.4883 3.96240   7
   0  -2 -17 141.240 20.2156   2
   0  -2 -17 94.0790 12.2127   7
   0  -2 -18 16.7113 10.5011   2
   0  -2 -18 1.36365 3.17447   7
   0  -2 -19 54.4874 13.8963   2
   0  -2 -19 36.4091 6.71521   7
   0  -2 -20 10.4264 11.1405   2
   0  -2 -20 12.6605 4.68633   7
   0  -2 -21 109.332 18.5518   2
   0  -2 -21 98.6565 12.9413   7
   0  -2 -22 41.7935 12.7443   2
   0  -2 -22 46.2148 7.89070   7
   0  -2 -23 3.48296 4.57686   7
   0  -2 -24 200.146 22.7683   7
   0  -2 -25 27.0873 6.58827   7
   0  -2 -26 62.1665 10.2727   7
   0  -2 -27 2.14880 5.24225   7
   0  -2 -28 9.01809 5.64602   7
   0  -2 -29 7.09141 5.61961   7
   0  -2 -30 12.3957 6.85788   7
   0  -2 -31 1.29740 5.12577   7
   0  -2 -32 18.9960 7.33678   7
   0   3 -30-4.45077 6.89881   7
   0  -3  29 12.7816 6.90409   1
   0   3 -29 1.40351 6.07612   7
   0  -3  28 6.18756 5.68888   1
   0   3 -28 9.37808 6.57084   7
   0  -3  27 19.2718 7.10836   1
   0   3 -27 17.9723 7.38415   7
   0  -3  26 4.66775 5.74090   1
   0   3 -26 12.2735 6.30504   7
   0  -3  25 1.13237 5.07134   1
   0   3 -25-1.17292 4.95253   7
   0  -3  24-5.46249 5.81064   1
   0   3 -24 2.23760 5.54584   7
   0  -3  23-4.20574 5.58639   1
   0   3 -23 6.39951 5.59183   7
   0  -3  22 12.1223 5.68236   1
   0   3 -22 11.1859 5.37241   7
   0  -3  21-0.97080 4.66263   1
   0   3 -21-2.90485 4.42024   7
   0  -3  20 63.1824 10.4176   1
   0   3 -20 69.1489 10.1820   7
   0  -3  19 34.6366 7.24223   1
   0   3 -19 31.4522 6.73791   7
   0  -3  18 60.2056 9.71151   1
   0   3 -18 68.8225 9.76654   7
   0  -3  17 32.3049 6.84122   1
   0   3 -17 32.8575 6.70492   7
   0  -3  16 56.0297 8.01070   1
   0   3 -16 34.0025 6.99588   7
   0  -3  15 100.297 12.7922   1
   0   3 -15 104.503 12.7114   7
   0  -3  14 67.4593 9.34362   1
   0   3 -14 65.4512 9.14690   7
   0  -3  13 46.6895 7.06784   1
   0   3 -13 37.3871 6.39951   7
   0  -3  12 2.43652 3.32435   1
   0   3 -12 1.14765 2.93042   7
   0  -3  11 61.5996 8.29319   1
   0   3 -11 58.7947 7.99420   7
   0  -3  10 18.1035 4.13167   1
   0   3 -10 14.3655 3.95411   7
   0  -3   9 173.934 18.4060   1
   0   3  -9 169.796 18.1866   7
   0   3  -8 31.8645 4.89838   7
   0  -3   8 23.3470 4.80657   1
   0   3  -7 714.364 69.1379   7
   0   3  -6 147.210 15.4334   7
   0  -3   5 414.234 41.4673   7
   0   3  -5 440.176 41.6347   7
   0  -3   4 11.5511 6.53243   8
   0  -3   4 8.90599 2.50580   7
   0   3  -4 11.4817 2.83310   7
   0  -3   4 8.11968 2.99550   1
   0   3  -3 101.435 10.0587   7
   0  -3   3 86.9578 12.6518   8
   0  -3   3 93.1474 10.2618   1
   0   3  -3 90.5690 10.1618   1
   0  -3   3 92.7821 9.90899   7
   0  -3   2 1.47970 5.52563   8
   0   3  -2 0.59111 4.96930   8
   0   3  -2 2.11951 2.34751   1
   0  -3   2 2.41478 2.34319   1
   0  -3   2 2.37941 1.85821   7
   0   3  -2 1.49608 1.95864   7
   0  -3   1 3318.12 307.642   7
   0   3  -1 3219.44 307.707   7
   0  -3   1 3201.85 310.053   8
   0   3  -1 3273.41 309.371   8
   0  -3   1 3153.57 307.922   1
   0   3  -1 3275.46 307.923   1
   0   3   0 601.401 61.1438   8
   0  -3   0 619.522 62.2413   8
   0  -3   0 641.533 59.5764   1
   0   3   0 628.587 59.5430   1
   0   3   0 608.278 59.3858   7
   0  -3   0 612.976 59.2791   7
   0   3   1 39.0641 4.72129   7
   0   3   1 40.9165 8.29757   8
   0  -3  -1 40.1040 4.69023   1
   0  -3  -1 30.8171 10.8896   8
   0  -3  -1 36.2840 4.50227   7
   0   3   1 36.0930 4.73274   1
   0   3   2 0.72799 6.80418   8
   0  -3  -2 9.99319 8.74259   8
   0  -3  -2 8.99107 2.30586   7
   0   3   2 10.5619 2.44561   1
   0  -3  -2 15.2528 2.37986   1
   0   3   2 8.93814 2.52702   7
   0  -3  -3 9.91514 3.10956   8
   0   3   3 5.45266 8.51508   8
   0  -3  -3 8.36287 1.99739   1
   0   3   3 9.83057 2.47333   7
   0  -3  -3 8.95130 2.33864   7
   0   3   3 9.06597 2.12279   1
   0   3   4 148.864 14.6310   1
   0  -3  -4 145.742 14.5631   1
   0  -3  -4 157.337 14.8077   8
   0   3   4 104.002 17.4772   8
   0  -3  -4 139.648 14.8124   7
   0   3   4 153.554 14.9037   7
   0   3   5 615.210 60.3278   8
   0   3   5 633.857 59.5943   1
   0   3   5 656.216 59.9297   7
   0  -3  -5 596.079 59.8718   7
   0  -3  -5 615.030 59.5604   1
   0   3   6 613.687 56.9199   8
   0   3   6 582.482 56.5984   1
   0  -3  -6 573.025 57.0522   7
   0   3   6 600.801 57.0119   7
   0  -3  -6 593.836 56.6129   1
   0   3   7 2370.41 225.718   8
   0  -3  -7 2414.91 225.387   1
   0  -3  -7 2356.09 225.949   7
   0   3   7 2355.85 225.365   1
   0  -3  -8 893.683 82.6722   7
   0   3   8 843.380 81.7533   1
   0  -3  -8 854.064 81.8080   1
   0  -3  -8 867.200 82.4926   7
   0  -3  -9 854.627 85.2663   7
   0  -3  -9 866.699 84.4925   1
   0  -3 -10 1020.74 86.8303   2
   0  -3 -10 783.086 82.5984   7
   0   3  10 873.057 81.8186   1
   0  -3 -11 106.284 12.0087   7
   0   3  11 105.251 10.9460   1
   0  -3 -11 119.925 16.7539   2
   0  -3 -12 344.419 36.1114   2
   0   3  12 287.856 28.5455   1
   0  -3 -12 291.694 29.6442   7
   0   3  13 187.512 18.7170   1
   0  -3 -13 175.840 19.7828   7
   0  -3 -14 139.047 22.0101   2
   0   3  14 116.661 11.6423   1
   0  -3 -14 95.2365 12.5027   7
   0   3  15 1.41659 2.05667   1
   0  -3 -15 2.77598 13.5366   2
   0  -3 -15 4.94726 3.07952   7
   0  -3 -16 244.551 27.2429   7
   0  -3 -16 465.135 43.2630   2
   0  -3 -17 8.71957 14.1718   2
   0  -3 -17 1.25366 3.28989   7
   0  -3 -18 128.447 23.8162   2
   0  -3 -18 96.2840 12.1736   7
   0  -3 -19 134.750 23.1240   2
   0  -3 -19 95.7124 12.5734   7
   0  -3 -20 49.4836 15.7892   2
   0  -3 -20 37.3344 6.89740   7
   0  -3 -21 45.6948 15.8108   2
   0  -3 -21 28.5691 6.63460   7
   0  -3 -22 314.275 38.6295   2
   0  -3 -22 262.889 29.1911   7
   0  -3 -23 14.6709 5.27969   7
   0  -3 -23 13.1437 13.2818   2
   0  -3 -24 171.373 20.0752   7
   0  -3 -25 24.7894 6.52949   7
   0  -3 -26 66.2511 10.6461   7
   0  -3 -27-2.10827 5.06251   7
   0  -3 -28 16.6460 6.46644   7
   0  -3 -29 58.2455 10.5343   7
   0  -3 -30 15.8594 6.48455   7
   0  -3 -31 2.55529 6.33044   7
   0  -3 -32-1.33576 5.98353   7
   0  -4  31-1.52677 7.67433   1
   0  -4  30 4.43923 7.33848   1
   0  -4  29 21.4509 7.85026   1
   0   4 -29 20.3377 7.66586   7
   0  -4  28 12.4272 6.98794   1
   0   4 -28 5.62228 6.34831   7
   0  -4  27 56.0023 11.4741   1
   0   4 -27 65.1122 11.7992   7
   0  -4  26 14.1685 6.87310   1
   0   4 -26 1.30774 6.10320   7
   0  -4  25 2.48907 6.34592   1
   0   4 -25-1.26375 5.44610   7
   0  -4  24 13.2458 6.58035   1
   0   4 -24 10.9092 6.28434   7
   0  -4  23 30.3973 7.98917   1
   0   4 -23 36.8357 8.31095   7
   0  -4  22 22.5900 7.16909   1
   0   4 -22 15.2918 6.41653   7
   0  -4  21 4.34207 4.95143   1
   0   4 -21-4.17594 5.32395   7
   0  -4  20 10.4142 5.84252   1
   0   4 -20 2.96888 4.54619   7
   0  -4  19 19.9509 6.15999   1
   0   4 -19 17.9162 6.12780   7
   0  -4  18 4.76190 4.83446   1
   0   4 -18 9.86742 5.05657   7
   0  -4  17 5.45404 4.83946   1
   0   4 -17 1.70319 4.09829   7
   0  -4  16 53.6723 8.41393   1
   0   4 -16 37.9136 7.64935   7
   0  -4  15-3.28716 4.75157   1
   0   4 -15 3.81174 3.99697   7
   0  -4  14 63.8548 9.69141   1
   0   4 -14 67.2801 9.45764   7
   0  -4  13 7.36107 4.52538   1
   0   4 -13 5.48349 3.91925   7
   0  -4  12 173.584 19.6506   1
   0   4 -12 181.925 19.5760   7
   0   4 -11 26.9269 5.30633   7
   0  -4  11 24.1534 5.19849   1
   0   4 -10 57.9339 7.64155   7
   0  -4  10 47.8321 7.57155   1
   0   4  -9 111.834 12.8293   7
   0   4  -8 93.3472 10.8715   7
   0   4  -7 14.4902 3.55964   7
   0  -4   6 308.889 31.4527   1
   0   4  -6 314.892 31.1721   7
   0  -4   5 21.3015 4.21002   1
   0   4  -5 20.9043 3.83353   7
   0  -4   4 45.3872 6.56491   1
   0  -4   4 57.3723 6.32344   7
   0   4  -4 47.4440 6.27667   7
   0  -4   3-1.86088 2.44300   1
   0  -4   3 1.08206 1.90852   7
   0   4  -3-0.30002 2.16356   7
   0   4  -2 6.75856 5.56181   8
   0  -4   2 8.39522 2.82634   1
   0   4  -2 6.36173 2.50270   7
   0  -4   2 4.95193 2.17365   7
   0  -4   1 231.846 29.4458   8
   0   4  -1 281.180 28.7122   8
   0   4  -1 268.265 26.3062   7
   0  -4   1 266.309 26.1240   7
   0  -4   1 268.090 26.5659   1
   0   4   0 0.25891 2.17757   7
   0   4   0 7.51252 6.34501   8
   0  -4   0 2.14154 1.77352   7
   0   4   0 0.60095 2.34748   1
   0  -4   0 0.30198 2.24144   1
   0  -4   0-1.19192 8.15462   8
   0   4   1 7.81563 6.12378   8
   0  -4  -1 1.38913 9.96000   8
   0  -4  -1 8.44848 2.19064   7
   0   4   1 4.64000 2.32931   7
   0  -4  -1 2.23048 2.21623   1
   0   4   1 7.87725 2.56574   1
   0   4   2 80.7301 8.64580   1
   0   4   2 76.1929 8.62596   7
   0  -4  -2 76.3957 8.56032   1
   0  -4  -2 77.2497 8.47197   7
   0   4   2 95.0408 12.4335   8
   0  -4  -2 73.4810 15.2721   8
   0  -4  -3 1060.06 102.749   1
   0   4   3 1098.52 102.825   1
   0  -4  -3 1103.49 102.766   7
   0   4   3 1100.17 102.894   7
   0  -4  -3 1010.26 104.517   8
   0   4   3 971.446 105.376   8
   0   4   4 74.9668 7.85971   7
   0  -4  -4 64.6699 7.59038   7
   0  -4  -4 59.9452 7.35274   1
   0   4   4 65.4793 7.55653   1
   0  -4  -4 82.4984 8.08439   8
   0   4   4 63.0501 13.0065   8
   0  -4  -5 1323.16 126.895   1
   0   4   5 1408.61 126.993   1
   0  -4  -5 1247.16 127.045   7
   0   4   5 1373.29 127.192   7
   0   4   5 1107.44 130.543   8
   0  -4  -5 1366.79 127.096   8
   0   4   6 2013.77 181.623   1
   0  -4  -6 1814.38 181.823   7
   0   4   6 2053.05 181.959   7
   0  -4  -6 1968.64 181.568   1
   0   4   7 339.525 31.8208   1
   0   4   7 281.023 33.0659   8
   0   4   7 352.755 32.2893   7
   0  -4  -7 305.794 32.1848   7
   0  -4  -7 332.147 31.7954   1
   0   4   8 21.8546 3.80929   7
   0  -4  -8 19.9476 3.96666   7
   0   4   8 22.0142 4.04185   8
   0   4   8 22.5315 3.19298   1
   0  -4  -8 25.8414 3.28824   1
   0  -4  -9 169.473 17.1826   7
   0   4   9 151.908 15.9920   1
   0  -4  -9 224.165 21.5261   2
   0   4   9 158.777 16.5021   8
   0  -4  -9 160.263 16.0638   1
   0  -4 -10 738.184 71.6205   7
   0   4  10 729.008 70.5598   1
   0   4  10 717.958 71.0746   8
   0  -4 -10 730.327 70.6462   1
   0  -4 -11 126.093 13.7868   7
   0  -4 -11 169.648 19.4332   2
   0  -4 -11 124.056 12.6903   1
   0   4  11 118.441 12.5617   1
   0  -4 -12 112.403 12.6841   7
   0   4  12 110.724 11.4228   1
   0  -4 -12 107.071 17.3987   2
   0  -4 -13 301.703 30.5155   7
   0   4  13 291.087 29.2288   1
   0  -4 -14 13.4405 3.92205   7
   0  -4 -14 4.92336 11.2893   2
   0  -4 -15 38.1175 6.17019   7
   0  -4 -15 43.3899 16.5640   2
   0  -4 -16 64.2458 8.82713   7
   0  -4 -16 98.6091 22.6587   2
   0  -4 -17 121.315 14.8499   7
   0  -4 -17 229.016 31.5986   2
   0  -4 -18 75.1634 21.7138   2
   0  -4 -18 21.8352 5.06683   7
   0  -4 -19 3.58306 15.7469   2
   0  -4 -19-0.70746 3.90462   7
   0  -4 -20 83.5276 21.3359   2
   0  -4 -20 47.9414 8.06524   7
   0  -4 -21 65.0267 21.2200   2
   0  -4 -21 50.2642 8.44339   7
   0  -4 -22 13.3188 15.1857   2
   0  -4 -22-0.83787 3.68230   7
   0  -4 -23 23.2215 16.6765   2
   0  -4 -23 31.4993 6.64536   7
   0  -4 -24 29.5420 17.2717   2
   0  -4 -24 34.3971 7.47142   7
   0  -4 -25-6.44616 16.6856   2
   0  -4 -25 10.4155 5.34540   7
   0  -4 -26 17.8896 6.17105   7
   0  -4 -27 40.6664 8.54033   7
   0  -4 -28 14.2286 6.25982   7
   0  -4 -29 117.001 15.9782   7
   0  -4 -30 3.61588 5.20538   7
   0  -4 -31 7.56056 6.46486   7
   0  -4 -32 3.95070 5.79953   7
   0  -5  29 7.97895 8.05525   1
   0  -5  28-1.54506 7.04905   1
   0   5 -28 5.78350 6.47808   7
   0  -5  27 35.8868 9.98442   1
   0   5 -27 36.2809 8.67785   7
   0  -5  26 8.65166 7.46649   1
   0   5 -26 1.34536 5.92484   7
   0  -5  25 155.653 19.0599   1
   0   5 -25 113.917 17.6307   7
   0  -5  24-5.35497 7.03011   1
   0   5 -24-3.73528 5.69274   7
   0  -5  23 108.294 16.4867   1
   0   5 -23 121.931 16.3177   7
   0  -5  22 9.92659 6.83170   1
   0   5 -22 10.3321 5.84891   7
   0  -5  21 1.19304 5.44215   1
   0   5 -21 1.09940 5.01520   7
   0  -5  20-1.14446 5.12780   1
   0   5 -20-2.10238 5.28517   7
   0  -5  19 208.217 23.8346   1
   0   5 -19 195.782 23.1652   7
   0  -5  18-1.05189 5.44176   1
   0   5 -18 3.82844 4.88261   7
   0  -5  17 142.550 17.3719   1
   0   5 -17 130.221 16.6403   7
   0  -5  16 18.2454 5.40557   1
   0   5 -16 0.86363 4.06416   7
   0  -5  15 102.316 12.6852   1
   0   5 -15 77.6979 11.6084   7
   0  -5  14 175.207 19.7125   1
   0   5 -14 162.992 19.1207   7
   0  -5  13 54.8574 8.55354   1
   0   5 -13 50.9492 8.08650   7
   0   5 -12 179.118 19.8342   7
   0   5 -11 24.3397 5.41964   7
   0   5 -10 2.38673 3.26038   7
   0  -5   9 5.18097 3.81602   1
   0   5  -9 5.00391 3.10567   7
   0  -5   8 13.4160 4.14243   1
   0   5  -8 14.0059 3.69910   7
   0  -5   7 27.5734 5.35420   1
   0   5  -7 36.1311 5.37430   7
   0  -5   6 164.514 18.0538   1
   0   5  -6 169.969 17.7789   7
   0  -5   5 101.273 12.2730   1
   0   5  -5 113.526 12.1217   7
   0  -5   4 10.6448 3.73875   1
   0   5  -4 16.0271 3.53944   7
   0  -5   3 101.373 11.5250   1
   0   5  -3 99.5899 11.1392   7
   0  -5   2 473.527 43.8242   7
   0   5  -2 431.474 46.2842   8
   0  -5   2 458.001 44.3416   1
   0   5  -2 424.074 43.8929   7
   0   5  -1 41.6385 8.17933   8
   0  -5   1 33.5972 4.69549   7
   0  -5   1 31.4680 5.27591   1
   0   5  -1 42.2092 5.28630   7
   0   5   0 28.4502 7.47401   8
   0  -5   0 33.7216 4.17828   7
   0  -5   0 25.3614 4.60754   1
   0   5   0 27.7503 4.47036   7
   0   5   1 17.2061 7.01143   8
   0  -5  -1 19.1226 3.12345   7
   0  -5  -1 15.9539 3.51918   1
   0   5   1 18.2612 3.54173   7
   0  -5  -2 45.1504 5.46684   7
   0   5   2 30.9730 8.62310   8
   0   5   2 43.9501 5.90811   7
   0  -5  -2 46.8258 5.82177   1
   0  -5  -3 128.982 13.2203   1
   0   5   3 133.886 16.6361   8
   0  -5  -3 124.928 13.0047   7
   0   5   3 118.601 13.2308   7
   0   5   4 32.7160 4.66334   7
   0  -5  -4 32.0358 4.35017   7
   0   5   4 29.9959 4.42138   1
   0  -5  -4 29.3299 5.49017   8
   0  -5  -4 30.1781 4.28665   1
   0   5   4 17.8874 8.55967   8
   0  -5  -5 832.662 82.5789   1
   0   5   5 865.746 82.6565   1
   0   5   5 796.826 86.1912   8
   0  -5  -5 1016.79 83.0551   8
   0  -5  -5 794.476 82.5959   7
   0   5   5 857.324 82.8318   7
   0   5   6 2.53627 2.07528   1
   0  -5  -6-0.95216 2.13655   7
   0  -5  -6 0.62993 2.06747   8
   0   5   6-1.63565 2.27319   7
   0  -5  -6 0.53244 1.84994   1
   0   5   6-4.07679 9.65835   8
   0   5   7 10.5531 2.56450   1
   0   5   7 8.94592 2.67809   7
   0  -5  -7 12.3333 2.58136   1
   0   5   7 2.92830 9.66118   8
   0  -5  -7 10.2267 2.82252   7
   0  -5  -8 88.3742 9.67248   1
   0   5   8 96.1911 9.78106   1
   0   5   8 55.3030 14.1560   8
   0   5   8 94.6495 10.1748   7
   0  -5  -9 31.6383 9.50877   2
   0   5   9 23.5286 3.46120   1
   0  -5  -9 22.8512 3.50035   1
   0   5   9 16.6038 6.67037   8
   0   5   9 22.4854 3.94402   7
   0   5  10 18.2591 3.08163   1
   0  -5 -10 20.7403 3.30053   1
   0  -5 -10 25.6325 9.11613   2
   0  -5 -10 21.2441 4.45908   7
   0   5  10 25.9794 5.43036   8
   0   5  11 5.05943 2.83010   8
   0  -5 -11 3.47642 7.79433   2
   0  -5 -11 2.25573 1.93522   1
   0   5  11 4.79465 1.86599   1
   0  -5 -11 6.15892 3.15213   7
   0  -5 -12 1.30367 1.80157   1
   0   5  12 0.41367 2.52384   8
   0  -5 -12 5.86331 8.25319   2
   0  -5 -12 1.58631 2.95585   7
   0   5  13 15.5509 3.66880   8
   0  -5 -13 14.8340 2.97528   1
   0  -5 -13-2.27288 11.8404   2
   0  -5 -13 18.7120 4.37535   7
   0   5  14 67.7949 8.61614   8
   0  -5 -14 88.7290 18.4665   2
   0  -5 -14 67.8549 8.99128   7
   0   5  15 2.41793 2.95947   8
   0  -5 -15-6.21214 15.6123   2
   0  -5 -15 4.27093 3.45884   7
   0  -5 -16 275.362 30.0833   7
   0  -5 -16 413.039 45.9342   2
   0  -5 -17 4.00299 19.8205   2
   0  -5 -17 1.96019 3.65479   7
   0  -5 -18 16.8147 19.8445   2
   0  -5 -18-0.67427 3.67563   7
   0  -5 -19 29.7682 21.1020   2
   0  -5 -19 14.0856 4.86851   7
   0  -5 -20 12.7226 18.6406   2
   0  -5 -20 3.00601 3.79059   7
   0  -5 -21 16.4264 17.6971   2
   0  -5 -21-0.79890 3.64356   7
   0  -5 -22 16.1144 18.3773   2
   0  -5 -22 3.45474 4.35804   7
   0  -5 -23 12.0047 17.2449   2
   0  -5 -23-1.76933 4.10761   7
   0  -5 -24 27.5864 18.9466   2
   0  -5 -24 39.4376 7.96695   7
   0  -5 -25 3.93383 18.0490   2
   0  -5 -25 22.7012 6.25390   7
   0  -5 -26-0.98740 4.76165   7
   0  -5 -26-42.9004 20.1739   2
   0  -5 -27 42.3777 8.73892   7
   0  -5 -28 50.8839 9.31164   7
   0  -5 -29 36.2747 8.75637   7
   0  -5 -30 16.6462 7.12649   7
   0   6 -27 41.9589 10.6435   7
   0  -6  27 65.0287 12.9484   1
   0   6 -26 37.7354 9.27793   7
   0  -6  26 35.4337 10.5964   1
   0   6 -25 33.7502 8.76018   7
   0  -6  25 24.8648 8.81257   1
   0   6 -24 11.7046 6.11958   7
   0  -6  24 8.99819 7.60386   1
   0   6 -23 31.2727 8.56792   7
   0  -6  23 43.3460 9.85379   1
   0   6 -22-1.20227 5.18225   7
   0  -6  22 5.56334 7.09271   1
   0   6 -21 16.1498 6.81901   7
   0  -6  21 29.3632 8.60982   1
   0   6 -20 26.5298 7.38002   7
   0  -6  20 14.0675 7.22703   1
   0   6 -19 16.9264 6.03636   7
   0  -6  19 29.4084 8.15325   1
   0   6 -18 59.6301 10.4522   7
   0  -6  18 69.0118 11.2632   1
   0   6 -17 23.1011 6.21570   7
   0  -6  17 20.1107 6.70990   1
   0   6 -16 4.58045 4.76460   7
   0  -6  16 6.39440 5.38006   1
   0   6 -15 47.0186 8.95226   7
   0  -6  15 78.1647 10.7495   1
   0   6 -14 81.7459 11.2962   7
   0   6 -13 83.6112 11.3454   7
   0   6 -12 217.894 23.7825   7
   0   6 -11-0.69927 3.90826   7
   0  -6  11-2.48229 4.62377   1
   0   6 -10 67.1654 9.42447   7
   0  -6  10 72.9750 10.1422   1
   0   6  -9 41.0042 6.65505   7
   0  -6   9 49.7872 7.73782   1
   0  -6   8 170.279 18.5459   1
   0   6  -8 158.346 17.8991   7
   0  -6   7 25.3712 5.62931   1
   0   6  -7 27.1178 5.27309   7
   0  -6   6 54.5753 7.67757   1
   0   6  -6 46.7755 7.05247   7
   0  -6   5 33.0586 5.86548   1
   0   6  -5 34.5207 5.48577   7
   0  -6   4 9.69867 3.48478   1
   0   6  -4 6.42445 2.91820   7
   0  -6   3 5.39932 2.93187   1
   0   6  -3 7.42231 2.95319   7
   0   6  -2 46.3569 9.45777   8
   0  -6   2 59.5079 7.12715   1
   0   6  -2 41.8958 6.35875   7
   0   6  -1 70.6202 11.2462   8
   0  -6   1 80.9198 9.22551   1
   0   6  -1 68.3807 8.68156   7
   0   6   0 12.1328 5.68255   8
   0   6   0 3.50735 2.52516   7
   0  -6   0 10.0227 3.13081   1
   0   6   1-1.01556 5.53601   8
   0   6   1 1.52100 2.19882   7
   0  -6  -1 0.29952 2.04932   7
   0  -6  -1-0.43236 2.73862   1
   0   6   2 64.5602 7.97448   7
   0  -6  -2 75.0845 7.73688   7
   0   6   2 61.0663 10.9421   8
   0  -6  -2 59.3320 7.98331   1
   0  -6  -3 24.4505 3.69711   7
   0   6   3 25.0321 4.07178   7
   0   6   3 20.2937 6.99066   8
   0  -6  -3 20.6221 3.94945   1
   0  -6  -4 0.93448 1.88025   7
   0   6   4-2.19380 2.35900   7
   0  -6  -4 3.34366 2.14884   1
   0   6   4-2.24332 6.90422   8
   0  -6  -5 182.323 18.5340   7
   0   6   5 188.140 18.7860   7
   0  -6  -5 181.196 18.5882   1
   0   6   5 149.758 21.7342   8
   0  -6  -6 201.790 22.1348   7
   0   6   6 244.138 22.5065   7
   0  -6  -6 221.536 22.2063   1
   0   6   6 201.595 26.2069   8
   0   6   7 311.436 30.3249   7
   0  -6  -7 315.134 30.1078   1
   0   6   7 232.813 33.8178   8
   0   6   8 196.914 20.0720   7
   0   6   8 160.805 24.8688   8
   0  -6  -8 199.625 19.7880   1
   0   6   9 19.2871 3.42936   7
   0   6   9 10.1606 10.6139   8
   0  -6  -9 11.5431 2.92044   1
   0  -6 -10 222.350 20.9257   1
   0   6  10 128.042 25.7500   8
   0  -6 -11 127.951 12.6009   7
   0   6  11 73.0434 15.7471   8
   0  -6 -11 91.6665 18.0594   2
   0  -6 -11 96.7885 10.8736   1
   0  -6 -12 1.17384 2.07548   1
   0   6  12-4.79717 7.87345   8
   0  -6 -12 3.42264 3.18965   7
   0  -6 -13 160.948 17.7986   7
   0   6  13 119.959 18.5418   8
   0  -6 -13 175.133 16.6805   1
   0  -6 -13 197.627 27.7234   2
   0  -6 -14 18.1072 4.84419   7
   0   6  14 26.1489 5.90379   8
   0  -6 -14 33.1063 15.0434   2
   0  -6 -15 6.89351 3.58499   7
   0  -6 -15 3.56577 15.0759   2
   0   6  15 9.94495 3.81853   8
   0  -6 -16 213.410 25.1144   7
   0   6  16 258.120 25.1543   8
   0  -6 -16 286.958 41.0736   2
   0  -6 -17 33.3415 6.45448   7
   0  -6 -17 53.8240 23.1020   2
   0  -6 -18 114.256 14.4118   7
   0  -6 -18 254.174 39.1509   2
   0  -6 -19 103.947 30.2874   2
   0  -6 -19 50.9167 8.33245   7
   0  -6 -20 24.8149 23.4315   2
   0  -6 -20 2.99033 4.03834   7
   0  -6 -21 34.8204 23.6098   2
   0  -6 -21 25.4337 5.80304   7
   0  -6 -22-4.80174 21.1028   2
   0  -6 -22-0.84682 4.38018   7
   0  -6 -23 4.69802 20.2461   2
   0  -6 -23 0.89648 4.23325   7
   0  -6 -24 4.65322 21.2224   2
   0  -6 -24-1.84152 4.69735   7
   0  -6 -25 9.14665 19.3296   2
   0  -6 -26-13.6683 23.2676   2
   0  -6 -27 31.5779 22.1961   2
   0   7 -26 4.39922 7.27234   7
   0  -7  25-6.92807 7.90851   1
   0   7 -25 14.1751 7.02883   7
   0  -7  24 10.0390 7.94387   1
   0   7 -24 8.20850 6.61953   7
   0  -7  23 40.2633 10.9610   1
   0   7 -23 30.3412 8.58255   7
   0  -7  22 10.8280 7.09713   1
   0   7 -22 6.35093 5.94612   7
   0  -7  21-5.94891 7.15081   1
   0   7 -21-3.66425 5.78322   7
   0  -7  20 4.27509 5.90184   1
   0   7 -20 3.52096 5.90985   7
   0  -7  19 4.09771 6.13087   1
   0   7 -19 4.50243 5.14982   7
   0  -7  18 14.3763 6.75902   1
   0   7 -18-4.31314 5.41960   7
   0  -7  17 58.7266 10.7651   1
   0   7 -17 49.5121 9.45758   7
   0   7 -16 3.94072 4.96516   7
   0   7 -15-0.94020 4.43937   7
   0   7 -14 22.3886 6.24783   7
   0  -7  13 62.9550 11.1399   1
   0   7 -13 79.4625 10.8580   7
   0  -7  12 51.9978 9.00343   1
   0   7 -12 47.1967 8.21344   7
   0  -7  11 17.7539 5.36257   1
   0   7 -11 9.30183 4.78963   7
   0  -7  10 112.042 13.6386   1
   0   7 -10 96.4832 12.7224   7
   0  -7   9 149.455 18.0041   1
   0   7  -9 140.232 17.2431   7
   0  -7   9 179.204 19.6526   2
   0   7  -8 10.5474 4.05227   7
   0  -7   8 9.62693 4.88614   1
   0  -7   7 113.689 13.5808   1
   0   7  -7 103.804 12.8671   7
   0  -7   6 34.8549 6.55432   1
   0   7  -6 37.0871 6.19651   7
   0  -7   5 6.88360 3.85793   1
   0   7  -5 7.28568 3.41341   7
   0  -7   4 4.56807 3.23594   1
   0   7  -4-0.53637 3.07163   7
   0  -7   3 9.30488 3.85995   1
   0   7  -3 13.3835 3.63112   7
   0  -7   2 5.90207 3.19300   1
   0   7  -2 6.83773 3.23459   7
   0   7  -1 91.2986 13.4820   8
   0   7  -1 86.9183 10.4523   7
   0  -7   1 90.2515 10.7887   1
   0   7   0 1.13155 5.77452   8
   0  -7   0 3.21755 2.93255   1
   0   7   0 2.23654 2.53892   7
   0   7   1 23.4437 4.27529   7
   0  -7  -1 21.4688 4.38433   1
   0   7   1 17.9076 7.12770   8
   0   7   2 1.12380 6.05132   8
   0   7   2 1.25269 2.72266   7
   0  -7  -2 2.44457 2.63729   1
   0   7   3 110.557 15.6979   8
   0   7   3 103.385 12.2112   7
   0  -7  -3 118.351 12.6053   1
   0   7   4-1.15865 6.15392   8
   0   7   4 9.27935 2.99211   7
   0  -7  -4 15.3634 3.42657   1
   0   7   5 94.4171 10.1780   7
   0   7   5 56.2327 12.7267   8
   0  -7  -5 89.2642 10.0913   1
   0  -7  -6 6.68164 2.97519   1
   0   7   6 1.25242 7.66947   8
   0   7   6 10.0590 2.89444   7
   0  -7  -7 10.6129 9.66493   2
   0  -7  -7 7.59146 2.79212   1
   0   7   7 6.50885 6.38171   8
   0   7   7 6.39243 2.63914   7
   0  -7  -8 7.67778 9.81872   2
   0   7   8 4.10355 6.71515   8
   0   7   8 7.18939 2.88439   7
   0  -7  -8 10.0151 2.74967   1
   0  -7  -9 18.5138 11.6534   2
   0   7   9 9.21573 3.03640   7
   0  -7  -9 9.28080 2.71837   1
   0   7  10 208.882 29.5063   8
   0   7  10 238.625 24.1788   7
   0  -7 -10 240.051 23.9167   1
   0   7  11 3.70333 9.71396   8
   0  -7 -12 71.7883 9.54968   7
   0  -7 -12 90.5251 20.0355   2
   0   7  12 55.6384 15.4376   8
   0  -7 -13 28.6521 15.1967   2
   0  -7 -13 23.3536 5.19203   7
   0  -7 -14 3.61962 15.5996   2
   0  -7 -14 1.87956 3.54583   7
   0  -7 -15 28.6021 18.7816   2
   0  -7 -15 24.5066 5.43915   7
   0  -7 -16 31.8503 20.7513   2
   0  -7 -16-0.67426 3.76626   7
   0  -7 -17 24.9665 22.4868   2
   0  -7 -18 32.6173 26.2689   2
   0  -7 -19 11.2283 24.6958   2
   0  -7 -20 5.63954 24.7903   2
   0  -7 -21 85.5761 31.7556   2
   0  -7 -22-16.5733 24.7908   2
   0  -7 -23 80.5059 29.8741   2
   0  -7 -24 5.31197 21.4801   2
   0  -7 -25-5.23980 21.1883   2
   0  -7 -26-10.3749 20.5121   2
   0  -7 -27 51.8475 26.8877   2
   0  -7 -28-5.07533 20.5232   2
   0   8 -24 10.1047 6.99279   7
   0  -8  23 8.87656 8.73739   1
   0   8 -23 15.3449 7.50693   7
   0  -8  22 1.70888 6.74950   1
   0   8 -22-1.34672 6.46265   7
   0  -8  21 1.64303 7.08321   1
   0   8 -21-3.89877 6.72340   7
   0  -8  20-1.57751 6.66729   1
   0   8 -20 7.50834 6.20277   7
   0  -8  19 31.7693 10.0109   1
   0   8 -19 34.9486 8.58864   7
   0   8 -18 3.47646 5.48038   7
   0   8 -17-1.11351 5.91706   7
   0   8 -16 14.9821 6.28004   7
   0  -8  15 31.5547 8.11305   1
   0   8 -15 23.5976 7.58132   7
   0  -8  14-1.20356 5.68204   1
   0   8 -14 1.96297 4.63376   7
   0  -8  13 79.1056 12.3425   1
   0   8 -13 75.0992 11.2860   7
   0   8 -12-0.89533 4.75696   7
   0  -8  12 2.18490 5.64947   1
   0   8 -11 27.2614 6.22441   7
   0  -8  11 26.0165 7.22848   1
   0   8 -10 80.0963 11.8193   7
   0  -8  10 104.101 13.0924   1
   0   8  -9 66.1344 9.50073   7
   0  -8   9 61.3386 10.3019   1
   0   8  -8 93.6722 11.7959   7
   0  -8   8 84.3041 12.0500   1
   0  -8   7 350.117 33.7104   2
   0  -8   7 282.293 30.1989   1
   0   8  -7 254.880 29.2930   7
   0  -8   6 4.05167 4.15917   1
   0  -8   6 17.9505 8.02804   2
   0   8  -6 11.2891 4.01379   7
   0  -8   5 22.4283 5.38710   1
   0  -8   5 21.8600 8.24485   2
   0   8  -5 13.4768 4.49940   7
   0  -8   4 55.3385 8.86698   1
   0   8  -4 66.4596 8.72544   7
   0  -8   3 216.100 21.5117   1
   0   8  -3 175.182 20.5551   7
   0  -8   2 2.69360 3.48253   1
   0   8  -2-1.64201 3.19969   7
   0  -8   1 84.6895 10.2629   1
   0   8  -1 71.7236 9.65453   7
   0   8   0 11.2584 6.93226   8
   0  -8   0 2.47517 3.38965   1
   0   8   0 9.43156 3.20640   7
   0   8   1 160.752 18.2800   7
   0  -8  -1 183.372 19.0324   1
   0   8   1 188.487 22.0797   8
   0  -8  -2 2.29481 3.36067   1
   0   8   2 2.42406 6.27158   8
   0   8   2 2.26912 2.96106   7
   0  -8  -3 8.32640 3.36748   1
   0   8   3 8.48208 6.95302   8
   0   8   3 4.37542 2.93282   7
   0   8   4 4.86715 6.45818   8
   0  -8  -4 24.1618 10.1090   2
   0  -8  -4 18.2756 4.29248   1
   0   8   5 219.193 29.8795   8
   0  -8  -5 271.321 27.4505   1
   0  -8  -6 8.33538 10.0073   2
   0   8   6-2.50906 6.67637   8
   0  -8  -6 5.01321 3.04876   1
   0  -8  -7-2.22637 9.78475   2
   0   8   7-2.58073 7.03432   8
   0  -8  -7-0.48342 2.91773   1
   0  -8  -8 24.5993 12.5206   2
   0   8   8 32.3004 9.90541   8
   0  -8  -8 18.9539 4.23087   1
   0  -8  -9 10.5591 12.9091   2
   0  -8 -10 141.667 25.0333   2
   0  -8 -14 112.573 28.2075   2
   0  -8 -15 29.0373 21.4452   2
   0  -8 -16 10.6764 23.9284   2
   0  -8 -17-5.79434 25.4708   2
   0  -8 -18-18.4537 26.0313   2
   0  -8 -19 37.8396 31.4294   2
   0  -8 -20 25.3735 26.3297   2
   0  -8 -21 51.1726 29.5713   2
   0  -8 -22-24.7061 30.6701   2
   0  -8 -23 103.687 32.1820   2
   0  -8 -24 35.4700 26.1961   2
   0  -8 -25-35.7138 30.5381   2
   0  -8 -26 5.82384 23.0088   2
   0  -8 -27 40.4448 24.6940   2
   0  -8 -28 46.2895 25.8030   2
   0   9 -23 4.45193 6.90060   7
   0   9 -22 5.74469 6.57242   7
   0   9 -21 1.38895 5.74271   7
   0   9 -20 60.3840 11.5867   7
   0   9 -19 7.76741 5.84406   7
   0   9 -18 21.1857 7.13603   7
   0  -9  18 45.8909 10.8947   1
   0   9 -17 15.5964 6.36594   7
   0  -9  17 4.54357 6.72805   1
   0   9 -16-1.15207 5.61833   7
   0  -9  16-1.44707 6.36077   1
   0   9 -15-4.42011 5.63634   7
   0  -9  15 4.14204 6.62713   1
   0   9 -14-2.11538 5.46989   7
   0  -9  14 1.31777 5.20501   1
   0   9 -13 11.1283 6.20424   7
   0  -9  13 12.5612 6.85205   1
   0   9 -12 67.8052 11.3858   7
   0  -9  12 94.5331 13.2923   1
   0  -9  11 13.6802 6.19353   1
   0  -9  10 2.17108 5.53898   1
   0  -9   9 5.17013 5.44304   1
   0  -9   8 55.2821 9.38775   1
   0  -9   7 4.71525 4.69044   1
   0  -9   6 36.0442 7.50000   1
   0  -9   5 66.3199 10.5225   1
   0  -9   5 75.6019 14.9612   2
   0  -9   4-1.64914 4.38105   1
   0  -9   4 7.71148 9.39953   2
   0  -9   3 8.72231 4.68901   1
   0  -9   3 19.2240 10.5253   2
   0  -9   2 556.693 51.4494   2
   0  -9   2 402.338 44.1831   1
   0  -9   1 46.1759 7.87929   1
   0  -9   1 91.0949 15.4154   2
   0  -9   0 87.8605 15.3580   2
   0  -9   0 65.1430 9.66905   1
   0   9   1 136.146 19.3562   8
   0  -9  -1 135.536 16.5917   1
   0  -9  -2 2.66027 3.34271   1
   0   9   2-5.20683 7.35712   8
   0  -9  -2-2.18004 8.81319   2
   0  -9  -3 9.04972 3.75360   1
   0   9   3 2.55881 6.36856   8
   0  -9  -3 4.64855 10.8079   2
   0  -9  -4-1.25667 3.59228   1
   0   9   4 6.36885 6.85606   8
   0  -9  -4-2.40362 10.1490   2
   0  -9  -5 3.04473 3.71959   1
   0   9   5 3.81719 6.67542   8
   0  -9  -5-2.56796 10.1457   2
   0  -9  -6 82.4673 18.6626   2
   0  -9  -6 53.4120 7.97827   1
   0  -9  -7 44.1442 17.1486   2
   0  -9  -8-3.15009 13.0242   2
   0  -9  -9-10.1309 15.1541   2
   0  -9 -10-3.61443 14.9440   2
   0  -9 -11 8.18107 17.2891   2
   0  -9 -12 88.5121 25.5346   2
   0  -9 -15 46.9018 28.4813   2
   0  -9 -16 6.34531 26.2350   2
   0  -9 -17 13.4474 30.1390   2
   0  -9 -18-6.90559 29.1653   2
   0  -9 -19 35.1149 29.8389   2
   0  -9 -20 21.1649 30.4688   2
   0  -9 -21 21.0322 30.8748   2
   0  -9 -22 13.7802 25.2286   2
   0  -9 -23 19.9717 27.5822   2
   0  -9 -24 19.6679 24.7001   2
   0  -9 -25 13.1648 24.1019   2
   0 -10  18 3.39312 6.54722   1
   0 -10  17 14.6214 7.27239   1
   0 -10  16 1.55410 7.45924   1
   0 -10  15 16.3460 8.04501   1
   0 -10  14 1.41901 6.47306   1
   0 -10  13 20.3370 8.48366   1
   0 -10  12-3.88605 6.61520   1
   0 -10  11 7.41683 6.06755   1
   0 -10  10 27.1667 8.35567   1
   0 -10   9 23.7082 7.17064   1
   0 -10   8-1.08026 5.81536   1
   0 -10   7 47.5271 9.31687   1
   0 -10   6 0.99277 4.60881   1
   0 -10   5 7.64256 4.92448   1
   0 -10   4 1.83968 4.48845   1
   0 -10   4 2.79618 13.4195   2
   0 -10   3 82.2399 11.7684   1
   0 -10   3 85.1598 20.3570   2
   0 -10   2 21.8465 12.2330   2
   0 -10   2 0.85489 3.97708   1
   0 -10   1 64.6417 17.0458   2
   0 -10   1 37.2462 7.34584   1
   0 -10   0 11.1786 12.0584   2
   0 -10   0 5.62688 4.68615   1
   0 -10  -1 89.3037 18.1258   2
   0 -10  -1 49.3170 8.40387   1
   0 -10  -2 53.4570 15.1313   2
   0 -10  -2 35.1156 7.00757   1
   0 -10  -3 28.5616 14.2358   2
   0 -10  -3 6.71572 4.43699   1
   0 -10  -4 16.3809 14.3203   2
   0 -10  -4 26.8411 6.05155   1
   0 -10  -5 20.3104 15.5572   2
   0 -10  -6-10.8511 16.8195   2
   0 -10  -7 7.81944 17.1983   2
   0 -10  -8 42.2255 21.8978   2
   0 -10  -9 13.6908 19.3127   2
   0 -10 -10 29.5195 23.7741   2
   0 -10 -11 100.521 31.0422   2
   0 -10 -12 45.3153 25.7274   2
   0 -10 -13-6.22536 26.2924   2
   0 -10 -17-7.53121 36.1477   2
   0 -10 -18 7.64786 30.2152   2
   0 -10 -19 206.972 51.0799   2
   0 -10 -20 7.76167 30.6648   2
   0 -10 -21 175.995 44.9080   2
   0 -10 -22-14.9196 34.0511   2
   0 -11  14-3.04289 6.29544   1
   0 -11  13 2.91031 6.27694   1
   0 -11  12 1.39203 6.57277   1
   0 -11  11 21.3056 7.95810   1
   0 -11  10-3.83351 6.70906   1
   0 -11   9 22.0675 7.61223   1
   0 -11   8 38.8693 8.73912   1
   0 -11   7 3.40170 5.79069   1
   0 -11   6 43.5673 8.81900   1
   0 -11   5-1.04974 4.95657   1
   0 -11   4 97.5164 13.6451   1
   0 -11   3 1.96826 4.64956   1
   0 -11   2-12.0284 17.9583   2
   0 -11   2-1.90864 4.43681   1
   0 -11   1 19.8021 15.2757   2
   0 -11   1 4.65733 4.64574   1
   0 -11   0-8.14727 18.9093   2
   0 -11   0 3.63537 4.15357   1
   0 -11  -1 12.5748 14.9036   2
   0 -11  -1 4.44407 4.80927   1
   0 -11  -2 12.9556 15.3954   2
   0 -11  -3 4.45072 13.8374   2
   0 -11  -4 96.3661 26.3265   2
   0 -11  -5 56.8281 24.0549   2
   0 -11  -6 5.08572 19.6087   2
   0 -11  -7 99.7803 29.4537   2
   0 -11  -8 56.2030 29.9407   2
   0 -11  -9 101.909 35.9739   2
   0 -11 -10 44.6412 28.3430   2
   0 -11 -11 114.696 38.7813   2
   0 -11 -12 28.4646 30.1674   2
   0 -11 -13 59.6525 34.4716   2
   0 -11 -14 15.5215 27.6180   2
   0 -11 -15 31.8084 37.0313   2
   0 -11 -18-16.6254 36.5664   2
   0 -12  11 2.86853 7.31836   1
   0 -12  10-2.75410 6.28569   1
   0 -12   9 17.2177 6.94677   1
   0 -12   8 5.09888 5.51445   1
   0 -12   7-4.92206 5.42784   1
   0 -12   6 1.18999 5.33056   1
   0 -12   5-2.30614 5.44774   1
   0 -12   4 69.4103 11.7091   1
   0 -12   3 4.36797 5.58337   1
   0 -12   2 82.0380 12.7025   1
   0 -12   0 27.4582 21.3260   2
   0 -12  -1 5.52854 18.4621   2
   0 -12  -2-5.69187 19.6304   2
   0 -12  -3 128.953 33.4440   2
   0 -12  -4 72.5026 29.3345   2
   0 -12  -5 6.22779 27.3762   2
   0 -12  -6 128.506 36.6563   2
   0 -12  -7 47.4328 29.5437   2
   0 -12  -8-6.99153 28.2718   2
   0 -12  -9 51.3037 30.0232   2
   0 -12 -10 7.63584 26.3349   2
   0 -12 -11 15.7709 32.6284   2
   0 -12 -12 16.2690 31.3920   2
   0 -12 -13-33.1712 37.2715   2
   0 -12 -14 42.2671 38.0690   2
   0 -13   7-6.66943 6.32845   1
   0 -13   6 23.3518 7.81895   1
   0 -13  -3 6.72003 20.0738   2
   0 -13  -4 34.6176 26.8866   2
   0 -13  -5 185.562 44.4152   2
   0 -13  -6 198.684 47.7882   2
   0 -13  -7 45.5610 28.8513   2
   0 -13  -8 54.6091 35.3176   2
   1 -13  -6 73.3904 32.7602   2
   1 -13  -5 6.45549 23.6136   2
   1 -13  -4 6.24999 21.5553   2
   1 -13  -3-11.6801 21.3837   2
   1 -13   5 9.07750 6.76081   1
   1 -12 -12 29.7988 33.4823   2
   1 -12 -11 48.7431 33.7317   2
   1 -12 -10-12.9499 26.2043   2
   1 -12  -9-6.00623 24.8331   2
   1 -12  -8-5.55723 24.4285   2
   1 -12  -7 15.4153 20.3474   2
   1 -12  -6 19.8655 21.9069   2
   1 -12  -5 87.2386 26.3527   2
   1 -12  -4 17.7631 17.6198   2
   1 -12  -3 12.4679 14.3763   2
   1 -12  -2 36.2104 17.6733   2
   1 -12  -1 27.2759 14.8644   2
   1 -12   0 11.3307 13.8524   2
   1 -12   2 5.54277 5.98975   1
   1 -12   3 21.5014 7.05666   1
   1 -12   4 9.25489 6.28798   1
   1 -12   5 14.2383 6.52679   1
   1 -12   6 20.7299 7.54068   1
   1 -12   7 26.3534 7.89698   1
   1 -12   8 1.29338 5.79372   1
   1 -12   9 6.68171 6.44388   1
   1 -12  10 12.4593 7.82182   1
   1 -11 -15 22.1678 29.2603   2
   1 -11 -14 19.9429 26.9400   2
   1 -11 -13 18.5346 25.5974   2
   1 -11 -12 27.3732 24.1987   2
   1 -11 -11-5.06531 20.9428   2
   1 -11 -10 9.47475 18.7325   2
   1 -11  -9 53.0791 22.7891   2
   1 -11  -8 12.4014 17.4938   2
   1 -11  -7-3.86077 17.2943   2
   1 -11  -6 10.8184 15.8812   2
   1 -11  -5 90.5737 22.6950   2
   1 -11  -4 16.3032 13.8537   2
   1 -11  -3-12.6079 14.9274   2
   1 -11  -2 8.86378 10.5613   2
   1 -11  -2 12.8891 5.50106   1
   1 -11  -1 8.57892 9.22431   2
   1 -11  -1 0.93703 4.50130   1
   1 -11   0-27.6797 12.2154   2
   1 -11   0-4.78517 4.79678   1
   1 -11   1 2.68145 9.53288   2
   1 -11   1 2.93555 4.22573   1
   1 -11   2-2.68285 11.3286   2
   1 -11   2-0.99852 5.30643   1
   1 -11   3 7.16551 5.18888   1
   1 -11   4 16.8173 6.53770   1
   1 -11   5 1.08052 5.26914   1
   1 -11   6 10.0159 5.59086   1
   1 -11   7 24.1908 7.11164   1
   1 -11   8-2.38511 5.44355   1
   1 -11   9-4.94293 6.04301   1
   1 -11  10 14.1121 6.58407   1
   1 -11  11 4.00036 6.20066   1
   1 -11  12 6.95462 5.90970   1
   1 -11  13 1.44959 6.49343   1
   1 -11  14 7.54597 7.04103   1
   1 -10 -21-8.91605 32.6141   2
   1 -10 -20 61.1571 38.0919   2
   1 -10 -19-16.5842 35.7687   2
   1 -10 -18 7.69440 30.3990   2
   1 -10 -17 14.0482 31.4855   2
   1 -10 -16 12.6394 24.9894   2
   1 -10 -13 4.65908 20.8704   2
   1 -10 -12-4.20976 18.1461   2
   1 -10 -11 59.0246 22.9291   2
   1 -10 -10 53.4080 18.8443   2
   1 -10  -9 16.6712 15.2879   2
   1 -10  -8 6.25181 12.9344   2
   1 -10  -7 8.86158 14.1997   2
   1 -10  -6-2.79403 13.1926   2
   1 -10  -4 2.36366 3.84790   1
   1 -10  -3 5.60425 4.70994   1
   1 -10  -2-1.63247 4.22384   1
   1 -10  -1 6.68328 4.54077   1
   1 -10   0 10.2611 5.14486   1
   1 -10   1-0.87490 4.06164   1
   1 -10   2 10.7677 5.17255   1
   1 -10   3 1.84436 4.35688   1
   1 -10   4 9.49385 5.44028   1
   1 -10   5 20.6245 6.00386   1
   1 -10   6 8.12732 5.79292   1
   1 -10   7 16.8413 6.42011   1
   1 -10   8 12.0348 6.14421   1
   1 -10   9 1.14053 5.73292   1
   1 -10  10 98.4803 14.5668   1
   1 -10  11 7.41186 6.15625   1
   1 -10  12 1.28715 6.07752   1
   1 -10  13-4.02287 6.74987   1
   1 -10  14 67.0775 12.5011   1
   1 -10  15 4.36907 6.41369   1
   1 -10  16 41.0567 10.6291   1
   1 -10  17 17.4264 8.35657   1
   1  -9 -24 32.8015 30.9636   2
   1  -9 -23 163.850 46.7382   2
   1  -9 -22 131.817 44.3897   2
   1  -9 -21 338.279 64.8342   2
   1  -9 -20 22.4035 30.2638   2
   1  -9 -19 61.7982 34.9995   2
   1  -9 -18 68.3852 31.4524   2
   1  -9 -17-11.1001 29.1159   2
   1  -9 -16 29.5034 21.7895   2
   1  -9 -15 74.7601 25.2781   2
   1  -9 -11 36.6075 15.9356   2
   1  -9 -10 25.4086 14.1830   2
   1  -9  -7 129.003 15.0744   1
   1  -9  -6 0.65450 3.47793   1
   1  -9  -5-2.72391 3.72097   1
   1  -9  -4 72.8987 9.99280   1
   1  -9  -3 324.847 33.6905   1
   1  -9  -2 151.331 17.4206   1
   1  -9  -1 46.6117 7.75154   1
   1  -9   0 87.9528 11.5971   1
   1  -9   1 216.618 23.8013   1
   1  -9   2 5.60996 4.56042   1
   1  -9   3 106.811 13.6014   1
   1  -9   4 17.9852 5.77967   1
   1  -9   5 170.431 19.9302   1
  -1   9  -6 40.7995 7.58219   7
   1  -9   6 32.3675 7.37807   1
  -1   9  -7 17.7655 5.77369   7
   1  -9   7 22.0997 6.57425   1
  -1   9  -8 15.7128 5.49223   7
   1  -9   8 15.9891 6.15220   1
  -1   9  -9 50.7891 8.98870   7
   1  -9   9 36.4117 8.58811   1
  -1   9 -10 53.1899 9.66609   7
   1  -9  10 58.6156 9.89284   1
  -1   9 -11-5.09684 5.95980   7
   1  -9  11 7.93083 5.94078   1
  -1   9 -12 43.4873 9.45173   7
   1  -9  12 72.1289 11.1949   1
  -1   9 -13 131.865 17.2461   7
   1  -9  13 132.103 17.9169   1
  -1   9 -14 44.4848 8.95691   7
   1  -9  14 25.7979 8.43812   1
  -1   9 -15-1.18380 5.58849   7
   1  -9  15 1.34743 7.15899   1
  -1   9 -16 56.4746 10.7471   7
   1  -9  16 53.4379 11.0029   1
  -1   9 -17 1.27336 5.80742   7
   1  -9  17-1.46614 7.36826   1
  -1   9 -18 29.0456 8.57781   7
  -1   9 -19 38.3122 9.82693   7
  -1   9 -20 2.83354 6.51137   7
   1  -9  20 19.8241 9.15252   1
  -1   9 -21 16.1151 7.41180   7
  -1   9 -22 6.05439 6.92674   7
   1  -8 -27 26.8645 25.3592   2
   1  -8 -26 111.631 38.0702   2
   1  -8 -25 43.7362 32.9063   2
   1  -8 -24 22.5465 31.1382   2
   1  -8 -23 68.2114 33.2921   2
   1  -8 -22 59.4851 36.1226   2
   1  -8 -21 224.626 51.0946   2
   1  -8 -20 38.9257 29.2870   2
   1  -8 -19-5.69150 23.5318   2
   1  -8 -18 15.2091 20.0752   2
   1  -8 -17 26.8902 20.5972   2
   1  -8 -16 135.208 28.3974   2
   1  -8 -15 48.7964 17.8632   2
   1  -8 -14 116.468 24.6386   2
   1  -8 -13 200.059 31.0573   2
   1  -8  -9 82.8653 10.2051   1
   1  -8  -8 46.8824 7.11022   1
  -1   8   7 51.9816 7.42843   7
   1  -8  -7 47.5087 7.12540   1
   1  -8  -6 43.6016 6.44163   1
  -1   8   6 34.9500 6.21676   7
  -1   8   5 144.923 16.7515   7
   1  -8  -5 158.937 16.9590   1
  -1   8   4 4.52496 3.27352   7
  -1   8   4-5.24543 5.69065   8
   1  -8  -4 2.39131 3.17964   1
  -1   8   3 3.43905 3.55322   7
   1  -8  -3 5.51787 3.56990   1
  -1   8   2 65.6280 8.98877   7
   1  -8  -2 70.1452 9.31092   1
  -1   8   1-0.60151 3.36208   7
   1  -8  -1 4.54341 3.71278   1
  -1   8   0 212.784 23.4832   7
   1  -8   0 229.331 23.8295   1
  -1   8  -1 130.584 15.2578   7
   1  -8   1 132.871 15.4199   1
  -1   8  -2 27.9956 5.44077   7
   1  -8   2 17.8267 5.06656   1
   1  -8   3 101.261 12.6443   1
  -1   8  -3 100.413 12.5784   7
   1  -8   4 13.0707 5.15581   1
  -1   8  -4 20.1145 5.30232   7
   1  -8   5 3.19977 4.33865   1
  -1   8  -5 8.21274 4.44378   7
   1  -8   6 3.32863 4.50912   1
  -1   8  -6 7.76999 4.62045   7
   1  -8   7 21.6438 5.86444   1
  -1   8  -7 13.6889 5.30878   7
   1  -8   8 19.0143 5.53168   1
  -1   8  -8 11.5656 4.97893   7
   1  -8   9-3.78525 4.46762   1
  -1   8  -9 3.44159 4.44971   7
   1  -8  10 63.2510 10.7936   1
  -1   8 -10 74.1425 10.4914   7
   1  -8  11 51.6901 9.34510   1
  -1   8 -11 43.7252 8.36642   7
   1  -8  12 15.1176 6.23885   1
  -1   8 -12 12.6065 5.50621   7
   1  -8  13 37.2316 8.38895   1
  -1   8 -13 27.3095 7.43440   7
   1  -8  14 62.4515 11.3814   1
  -1   8 -14 75.9753 11.3178   7
  -1   8 -15 36.3368 8.54688   7
  -1   8 -16 11.4805 5.95371   7
  -1   8 -17 106.337 15.5262   7
   1  -8  18 22.3942 7.77318   1
  -1   8 -18 18.6203 6.86781   7
   1  -8  19 16.0241 7.53844   1
  -1   8 -19 11.6001 6.87859   7
   1  -8  20 10.6035 7.40896   1
  -1   8 -20 4.00899 5.31090   7
   1  -8  21 1.57298 6.22132   1
  -1   8 -21 5.53751 6.54347   7
   1  -8  22 11.3981 8.47951   1
  -1   8 -22 10.0257 6.83467   7
  -1   8 -23 10.3615 6.70112   7
  -1   8 -24 10.7039 7.04696   7
   1  -7 -27 42.4999 27.9799   2
   1  -7 -26 31.4934 25.0553   2
   1  -7 -25-6.56234 29.9352   2
   1  -7 -24-26.9903 31.9558   2
   1  -7 -23 128.919 40.2390   2
   1  -7 -22 26.5082 25.6665   2
   1  -7 -21 85.5476 33.4579   2
   1  -7 -20 16.7550 23.1397   2
   1  -7 -19 87.0067 28.4278   2
   1  -7 -19 52.3970 9.59897   7
   1  -7 -18-4.08474 14.9371   2
   1  -7 -18-0.93783 4.98412   7
   1  -7 -17 50.9106 20.2403   2
   1  -7 -17 66.1262 10.2006   7
   1  -7 -16-3.15986 13.8893   2
   1  -7 -16 3.60802 4.47343   7
   1  -7 -15 14.2311 13.4437   2
   1  -7 -15 3.57268 4.70386   7
   1  -7 -14 310.307 36.2223   2
   1  -7 -14 244.485 28.1866   7
  -1   7  12 134.992 14.7005   7
   1  -7 -12 120.575 13.8436   1
  -1   7  11 126.962 14.4424   7
   1  -7 -11 123.178 13.7812   1
  -1   7  10 118.245 12.1954   7
   1  -7 -10 85.6356 11.1254   1
  -1   7   9 220.972 24.5799   7
   1  -7  -9 249.726 24.4250   1
  -1   7   8 67.3552 9.40805   7
   1  -7  -8 79.1960 9.30138   1
  -1   7   8 77.0247 11.3860   8
  -1   7   7 4.35986 3.12950   7
   1  -7  -7 1.42244 2.60119   1
  -1   7   7 6.51997 5.31137   8
   1  -7  -6 221.868 20.8118   1
  -1   7   6 195.841 20.8588   7
  -1   7   6 160.632 21.5630   8
  -1   7   5 2.14540 2.74293   7
  -1   7   5-3.12801 4.67435   8
   1  -7  -5 4.54415 2.82808   1
  -1   7   4 59.2494 7.93036   7
  -1   7   4 50.8589 8.91670   8
   1  -7  -4 58.6055 7.67248   1
  -1   7   3-1.08238 3.12904   7
  -1   7   3-0.79647 4.55351   8
   1  -7  -3 1.05959 2.70146   1
   1  -7  -2 20.2490 4.33204   1
  -1   7   2 21.3747 4.53819   7
  -1   7   1 85.0192 10.8775   7
   1  -7  -1 93.1681 11.0198   1
   1  -7   0 40.8355 6.61562   1
  -1   7   0 42.3130 6.60502   7
   1  -7   1 1.20975 2.95665   1
  -1   7  -1 3.52141 3.32374   7
   1  -7   2 38.3460 6.47730   1
  -1   7  -2 36.8265 6.23401   7
   1  -7   3 16.4073 4.53951   1
  -1   7  -3 11.8183 4.18772   7
   1  -7   4 8.88057 3.60517   1
  -1   7  -4 10.9738 3.92591   7
   1  -7   5-1.42161 3.67588   1
  -1   7  -5 0.66863 3.64483   7
   1  -7   6-1.48756 4.34868   1
  -1   7  -6 3.42441 3.49324   7
   1  -7   7 83.2998 11.3112   1
  -1   7  -7 81.8363 10.8820   7
   1  -7   8 35.8301 6.74777   1
  -1   7  -8 27.3764 6.02011   7
   1  -7   9-1.70280 4.15110   1
  -1   7  -9 1.54651 4.05394   7
   1  -7  10 160.526 16.7855   1
  -1   7 -10 110.928 15.4647   7
  -1   7 -11 30.6086 6.41868   7
   1  -7  11 16.8368 5.76892   1
  -1   7 -12 94.5859 13.1658   7
   1  -7  12 104.720 13.6251   1
  -1   7 -13 41.0725 7.93598   7
  -1   7 -14 1.95277 4.68910   7
  -1   7 -15 35.6997 7.94822   7
  -1   7 -16 22.3229 6.93405   7
   1  -7  16 22.2079 7.22024   1
  -1   7 -17 18.8236 6.91272   7
   1  -7  17 24.3766 7.55239   1
  -1   7 -18 55.3215 10.6509   7
   1  -7  18 62.2332 11.4022   1
  -1   7 -19 4.79268 5.84372   7
   1  -7  19-1.32227 5.58518   1
  -1   7 -20 1.24433 5.87902   7
   1  -7  20 4.12459 6.60198   1
  -1   7 -21 11.6176 6.35624   7
   1  -7  21 7.13981 6.45679   1
  -1   7 -22 16.0675 6.85879   7
   1  -7  22 11.8497 7.11733   1
  -1   7 -23 5.54391 6.09273   7
   1  -7  23-3.06615 7.92931   1
  -1   7 -24 10.0442 7.35122   7
   1  -7  24 22.1807 8.64642   1
  -1   7 -25 44.5180 10.7998   7
   1  -7  25 50.7709 11.3892   1
   1  -6 -26 3.61185 5.97150   7
   1  -6 -26 5.53421 22.8783   2
   1  -6 -25 32.4987 7.97734   7
   1  -6 -25 34.3485 24.8629   2
   1  -6 -24-1.07707 5.41332   7
   1  -6 -24 11.8664 25.5689   2
   1  -6 -23 5.12432 5.16608   7
   1  -6 -23-11.9666 25.2670   2
   1  -6 -22 6.99183 5.14898   7
   1  -6 -22 41.2360 29.1765   2
   1  -6 -21 3.97030 4.70111   7
   1  -6 -21 5.41588 24.2580   2
   1  -6 -20 5.02134 4.91923   7
   1  -6 -20 4.77659 20.5899   2
   1  -6 -19 80.8129 11.5755   7
   1  -6 -19 69.3527 23.2006   2
   1  -6 -18-4.56154 4.86550   7
   1  -6 -18-3.42602 14.7703   2
   1  -6 -17 36.4929 7.28844   7
   1  -6 -17 21.4808 14.1080   2
   1  -6 -16 0.86720 4.61720   7
   1  -6 -16 26.5947 14.6801   2
   1  -6 -15 15.3636 5.36732   7
   1  -6 -15 9.29306 10.8640   2
   1  -6 -14 28.0449 4.86709   1
   1  -6 -14 32.9077 6.99864   7
   1  -6 -13 4.11953 2.80031   1
   1  -6 -12-0.80232 2.56439   1
  -1   6  12 2.34296 3.07100   7
  -1   6  11 14.7289 9.49539   8
   1  -6 -11 31.2050 4.64886   1
  -1   6  11 29.7101 5.39104   7
  -1   6  10 2.74029 3.02872   7
   1  -6 -10 2.36451 2.38283   1
   1  -6  -9 242.533 24.1570   1
  -1   6   9 207.373 26.6909   8
  -1   6   9 245.626 24.7510   7
  -1   6   8 27.1131 7.25739   8
  -1   6   8 21.4828 4.90110   7
   1  -6  -8 29.3245 4.48019   1
  -1   6   7 53.6904 9.36359   8
  -1   6   7 49.6016 7.28123   7
   1  -6  -7 53.4209 6.76729   1
   1  -6  -6 36.1047 5.09815   8
  -1   6   6 33.7468 7.28651   8
  -1   6   6 42.9614 6.16635   7
   1  -6  -6 37.2000 5.39253   1
   1  -6  -5 61.1632 7.01638   8
  -1   6   5 52.1526 7.33202   7
  -1   6   5 50.6826 8.50221   8
   1  -6  -5 51.5050 6.97806   1
  -1   6   4 13.3425 3.68211   7
   1  -6  -4 9.58530 3.16631   1
  -1   6   4 4.86836 4.50137   8
   1  -6  -3 197.796 20.4603   1
  -1   6   3 166.053 21.2158   8
  -1   6   3 219.732 20.9032   7
   1  -6  -2 171.922 18.3201   1
  -1   6   2 159.507 19.2222   8
  -1   6   2 181.792 18.5393   7
   1  -6  -1 106.120 12.6522   1
  -1   6   1 120.817 13.0330   7
  -1   6   0 1.02541 2.99924   7
   1  -6   0-2.51370 2.94104   1
   1  -6   1 147.938 16.1452   1
  -1   6  -1 145.447 16.1751   7
   1  -6   2 96.1528 11.7146   1
  -1   6  -2 102.618 11.8495   7
   1  -6   3 377.930 38.4031   1
  -1   6  -3 383.796 38.3551   7
  -1   6  -4 10.1580 3.68676   7
   1  -6   4 8.99817 3.58420   1
  -1   6  -5 16.1578 4.23678   7
   1  -6   5 11.3096 3.84974   1
  -1   6  -6 103.293 12.8258   7
   1  -6   6 115.290 13.2222   1
  -1   6  -7 67.2880 9.33081   7
   1  -6   7 73.7620 9.67451   1
  -1   6  -8 64.8476 8.64492   7
   1  -6   8 54.3838 8.66919   1
  -1   6  -9-0.69823 3.61078   7
   1  -6   9 0.76049 3.70783   1
   1  -6  10 31.1172 6.29815   1
  -1   6 -10 22.0773 5.74844   7
  -1   6 -11 22.4374 5.62371   7
  -1   6 -12 6.48760 4.46289   7
  -1   6 -13 35.7288 6.96451   7
   1  -6  14 15.2717 5.87115   1
  -1   6 -14 9.79286 5.04460   7
   1  -6  15 139.646 18.2118   1
  -1   6 -15 157.658 18.1062   7
   1  -6  16 12.5001 6.15994   1
  -1   6 -16 7.81140 5.40328   7
   1  -6  17 9.77748 5.74264   1
  -1   6 -17 24.5117 6.64341   7
   1  -6  18-3.39709 5.35024   1
  -1   6 -18-1.06730 4.95877   7
   1  -6  19 108.468 14.1318   1
  -1   6 -19 71.2920 12.7828   7
   1  -6  20 3.68028 5.89661   1
  -1   6 -20 3.48293 5.01450   7
   1  -6  21 14.0186 7.09973   1
  -1   6 -21 16.9199 6.98586   7
   1  -6  22 15.8727 6.97874   1
  -1   6 -22 22.6202 7.56161   7
   1  -6  23 9.59672 6.80971   1
  -1   6 -23 2.60959 6.18370   7
   1  -6  24 42.6175 9.72063   1
  -1   6 -24 28.4289 8.39294   7
   1  -6  25 19.0984 7.65229   1
  -1   6 -25 4.20820 5.87009   7
   1  -6  26 9.11197 6.92838   1
  -1   6 -26-5.80897 6.74276   7
   1  -6  27 1.56785 6.19278   1
  -1   6 -27-3.00375 6.97107   7
   1  -5 -31 30.0279 8.63064   7
   1  -5 -30-3.94376 6.90202   7
   1  -5 -29 62.1260 11.2981   7
   1  -5 -28-6.15100 6.73107   7
   1  -5 -27 86.6445 13.4589   7
   1  -5 -26 9.40071 5.79777   7
   1  -5 -25 16.9138 6.38439   7
   1  -5 -25 38.9042 24.1395   2
   1  -5 -24 5.33278 5.13368   7
   1  -5 -24-15.1435 24.6144   2
   1  -5 -23 17.2874 6.22225   7
   1  -5 -23 62.5112 26.6256   2
   1  -5 -22 6.82512 4.72231   7
   1  -5 -22 5.18313 23.2215   2
   1  -5 -21 22.8634 6.43194   7
   1  -5 -21 34.2001 23.5513   2
   1  -5 -20 8.53442 5.03224   7
   1  -5 -20 4.34212 18.3506   2
   1  -5 -19 31.0512 7.34775   7
   1  -5 -19 67.1555 20.8451   2
   1  -5 -18 98.5412 12.9739   7
   1  -5 -18 71.9889 20.8368   2
   1  -5 -17 17.0065 5.57496   7
   1  -5 -17 30.9804 14.0089   2
  -1   5  16 327.346 34.5469   8
   1  -5 -16 452.724 44.3482   2
   1  -5 -16 359.263 36.4093   7
   1  -5 -15 555.544 55.3121   7
   1  -5 -15 703.956 62.2424   2
   1  -5 -15 562.886 53.6614   1
  -1   5  15 511.434 53.4088   8
   1  -5 -14 112.778 14.4733   7
  -1   5  14 109.873 12.6174   8
   1  -5 -14 128.287 12.9493   1
  -1   5  13 18.9883 3.77086   8
   1  -5 -13 23.4122 5.67088   7
   1  -5 -13 20.2872 3.95335   1
   1  -5 -12 6.96030 2.71856   1
  -1   5  12 2.81939 2.70607   8
  -1   5  11 18.8199 4.27978   7
   1  -5 -11 23.2280 3.80476   1
  -1   5  11 10.6548 4.61376   8
  -1   5  10 161.904 16.0696   7
   1  -5 -10 150.381 15.1469   1
  -1   5   9 200.812 27.8715   8
   1  -5  -9 235.259 24.4404   1
  -1   5   9 279.077 25.4401   7
   1  -5  -8 286.303 27.3753   1
  -1   5   8 298.538 28.1343   7
  -1   5   7 157.744 21.9635   8
   1  -5  -7 202.623 20.1463   1
  -1   5   7 214.818 20.8444   7
  -1   5   6 189.702 20.6241   8
  -1   5   6 187.409 19.2113   7
   1  -5  -6 173.021 18.5163   1
   1  -5  -5 42.3314 5.94736   1
  -1   5   5 42.1302 7.91748   8
   1  -5  -5 52.6316 5.74969   8
  -1   5   5 45.5710 6.67667   7
   1  -5  -4 88.8817 10.4736   1
  -1   5   4 94.7641 11.0085   7
  -1   5   4 90.2694 11.9214   8
   1  -5  -4 106.550 11.4006   8
   1  -5  -3 25.6810 9.46551   8
  -1   5   3 31.6731 6.06436   8
  -1   5   3 25.4981 4.84161   7
   1  -5  -3 30.7508 4.65823   1
   1  -5  -2 23.3209 10.1748   8
  -1   5   2 22.2943 4.50582   7
   1  -5  -2 26.5975 4.33021   1
  -1   5   2 28.0667 5.57488   8
   1  -5  -1 273.841 27.2963   1
   1  -5  -1 259.661 31.5449   8
  -1   5   1 264.860 28.1830   8
  -1   5   1 274.119 27.5554   7
   1  -5   0 0.42594 2.64914   1
  -1   5   0-2.22584 3.07109   7
   1  -5   1 3.13050 2.66146   1
  -1   5  -1 3.59747 2.78595   7
   1  -5   2 157.935 15.4144   1
  -1   5  -2 123.323 15.0386   7
  -1   5  -3 1006.87 98.9781   7
   1  -5   3 1048.35 99.1595   1
  -1   5  -4 8.14862 3.31367   7
   1  -5   4 7.78448 3.54589   1
   1  -5   5 418.792 40.7508   1
  -1   5  -5 395.614 40.4990   7
  -1   5  -6 7.35744 3.53674   7
   1  -5   6 9.19806 3.62349   1
   1  -5   7 93.7559 11.3983   1
  -1   5  -7 90.9409 11.1446   7
   1  -5   8 4.44179 3.37210   1
  -1   5  -8-1.18142 3.09772   7
  -1   5  -9 18.7024 4.67897   7
  -1   5 -10 57.2081 8.11627   7
  -1   5 -11 285.530 29.9073   7
   1  -5  12-2.30117 4.02179   1
  -1   5 -12 3.67286 3.29024   7
   1  -5  13 0.80221 3.97213   1
  -1   5 -13-1.55222 3.66411   7
   1  -5  14 8.38189 4.64265   1
  -1   5 -14 9.00794 4.42812   7
   1  -5  15 12.2526 5.16395   1
  -1   5 -15 4.29408 4.18066   7
   1  -5  16 40.2567 8.45630   1
  -1   5 -16 56.9168 8.97465   7
   1  -5  17 140.408 17.5018   1
  -1   5 -17 144.181 17.6049   7
   1  -5  18 18.9349 6.62762   1
  -1   5 -18 27.8172 6.82750   7
   1  -5  19 152.623 18.6371   1
  -1   5 -19 145.477 18.4709   7
   1  -5  20 70.2533 11.5972   1
  -1   5 -20 80.3407 12.0004   7
   1  -5  21 6.75354 5.59410   1
  -1   5 -21 3.39830 5.79636   7
   1  -5  22 122.783 17.0531   1
  -1   5 -22 136.899 17.6357   7
   1  -5  23 57.1329 10.1897   1
  -1   5 -23 31.9335 8.81183   7
   1  -5  24 103.529 15.4200   1
  -1   5 -24 105.954 15.5207   7
   1  -5  25 3.92218 6.48789   1
  -1   5 -25 5.30285 6.37682   7
   1  -5  26 1.35176 5.94592   1
  -1   5 -26 4.12563 6.38779   7
   1  -5  27 9.78083 6.88543   1
  -1   5 -27 11.3989 7.01858   7
   1  -5  28-1.44193 6.57765   1
  -1   5 -28-1.47561 6.85029   7
   1  -5  29 17.8619 8.38646   1
   1  -4 -31 1.36973 6.24826   7
   1  -4 -30 3.95143 5.80060   7
   1  -4 -29 83.5000 13.7246   7
   1  -4 -28 12.1840 6.14153   7
   1  -4 -27 36.7044 8.45001   7
   1  -4 -26 18.4487 6.13268   7
   1  -4 -25 32.7144 7.90607   7
   1  -4 -24-4.13161 19.1855   2
   1  -4 -24 7.49772 5.49308   7
   1  -4 -23 13.1175 20.6443   2
   1  -4 -23 3.02986 4.93592   7
   1  -4 -22-4.40607 21.1556   2
   1  -4 -22 8.59119 5.37860   7
   1  -4 -21 26.3935 23.3902   2
   1  -4 -21 9.16267 4.82885   7
   1  -4 -20-20.0667 20.7573   2
   1  -4 -20-2.67594 4.93497   7
   1  -4 -19-3.51256 16.3042   2
   1  -4 -19-1.76902 4.24826   7
   1  -4 -18 531.868 56.3146   7
   1  -4 -18 674.571 66.5847   2
   1  -4 -17 30.0454 12.7942   2
   1  -4 -17 31.9803 6.62609   7
   1  -4 -16 362.451 40.3388   7
   1  -4 -16 505.933 47.3946   2
   1  -4 -15 23.5212 9.41811   2
   1  -4 -15 15.8410 5.09689   7
   1  -4 -14 2.91941 3.62415   7
   1  -4 -13 68.5743 8.47874   1
   1  -4 -13 82.5210 10.2904   7
   1  -4 -12 213.281 22.4459   7
   1  -4 -12 199.933 20.7225   1
  -1   4  11 83.8666 9.04655   8
   1  -4 -11 80.5688 9.26301   1
  -1   4  10 1171.44 116.573   1
  -1   4  10 1292.96 117.514   7
  -1   4  10 1217.78 116.423   8
   1  -4 -10 1235.37 116.717   1
   1  -4  -9 14.7563 2.87494   1
  -1   4   9 6.48476 3.12248   7
  -1   4   9 5.09735 2.40190   1
  -1   4   9 13.4293 2.74236   8
  -1   4   8 351.930 32.6359   1
  -1   4   8 356.452 33.4123   7
   1  -4  -8 341.725 32.6621   1
  -1   4   8 268.941 33.1487   8
  -1   4   7 1343.51 128.595   1
  -1   4   7 1456.02 129.372   7
   1  -4  -7 1421.97 128.691   1
  -1   4   7 1020.24 130.368   8
  -1   4   6 85.7335 9.47378   1
  -1   4   6 91.7732 10.1957   7
   1  -4  -6 89.2668 9.53710   1
  -1   4   6 68.2311 12.3666   8
  -1   4   5 707.308 69.3466   1
  -1   4   5 785.466 70.0241   7
   1  -4  -5 687.539 69.6571   7
  -1   4   5 666.846 70.5365   8
   1  -4  -5 722.146 68.8981   8
   1  -4  -5 744.991 69.3660   1
  -1   4   4 549.632 55.7407   1
   1  -4  -4 560.763 55.7251   1
   1  -4  -4 509.177 55.8859   7
  -1   4   4 588.923 56.2745   7
   1  -4  -4 692.248 55.7360   8
  -1   4   4 540.198 56.7074   8
   1  -4  -3 42.5156 5.67454   7
   1  -4  -3 41.6198 9.29659   8
  -1   4   3 39.5197 6.69548   8
  -1   4   3 43.4358 6.00098   7
   1  -4  -3 43.7774 5.50397   1
  -1   4   2 170.919 20.3250   8
   1  -4  -2 212.368 24.1961   8
   1  -4  -2 189.552 19.7358   1
  -1   4   2 198.179 20.0722   7
   1  -4  -2 211.660 19.9487   7
  -1   4   1 235.879 22.4117   7
   1  -4  -1 192.055 24.6088   8
  -1   4   1 206.609 22.6473   8
   1  -4  -1 221.112 22.0754   1
   1  -4  -1 217.960 22.0396   7
  -1   4   0 516.313 48.2063   7
   1  -4   0 503.025 48.0391   1
   1  -4   0 487.810 47.8846   7
   1  -4   0 431.592 49.8072   8
   1  -4   1 42.6814 5.68172   1
  -1   4  -1 38.7876 5.77356   7
   1  -4   1 38.0060 5.32387   7
   1  -4   1 45.7449 8.27903   8
   1  -4   2 10.9758 3.33882   1
  -1   4  -2 10.7324 3.33823   7
   1  -4   2 13.0091 6.23831   8
   1  -4   3 117.895 13.3524   1
  -1   4  -3 127.388 13.3781   7
   1  -4   4 473.343 44.6473   1
  -1   4  -4 433.365 44.3890   7
   1  -4   5 208.659 22.2927   1
  -1   4  -5 221.299 22.2094   7
  -1   4  -6 49.0258 6.79163   7
  -1   4  -7 3.89581 3.01995   7
  -1   4  -8 95.7960 11.3422   7
  -1   4  -9 18.8310 4.47577   7
   1  -4  10 93.7670 11.9744   1
  -1   4 -10 107.520 12.1311   7
   1  -4  11 112.411 14.0304   1
  -1   4 -11 129.733 14.2106   7
   1  -4  12-2.91643 3.06848   2
  -1   4 -12 2.01094 3.56175   7
   1  -4  12 0.66015 3.36649   1
  -1   4 -13 85.5977 10.0419   7
   1  -4  13 55.4691 8.98552   1
  -1   4 -14-0.75691 3.45253   7
   1  -4  14 2.90710 3.91232   1
  -1   4 -15 144.799 16.8677   7
   1  -4  15 140.224 16.6602   1
  -1   4 -16 8.43544 4.83656   7
   1  -4  16 8.76600 4.52514   1
  -1   4 -17 334.916 32.4125   7
   1  -4  17 270.849 31.5105   1
  -1   4 -18-0.93387 4.76265   7
   1  -4  18 2.61537 3.90538   1
  -1   4 -19 0.97907 4.77529   7
   1  -4  19 1.81919 4.43670   1
  -1   4 -20 17.4223 6.31378   7
   1  -4  20 29.3827 6.64292   1
  -1   4 -21 33.2120 7.90784   7
   1  -4  21 32.5931 7.63028   1
  -1   4 -22 25.7224 7.73797   7
   1  -4  22 29.7998 7.55764   1
  -1   4 -23 11.6613 6.02087   7
   1  -4  23 8.54000 5.67594   1
  -1   4 -24 84.9343 12.2184   7
   1  -4  24 57.6047 11.1916   1
  -1   4 -25 5.05211 6.37961   7
   1  -4  25 8.05042 5.55579   1
  -1   4 -26 22.2968 7.79501   7
   1  -4  26 28.6473 7.73250   1
  -1   4 -27 66.7533 11.5616   7
   1  -4  27 50.7512 10.9632   1
  -1   4 -28 101.741 15.3754   7
   1  -4  28 91.0572 14.4218   1
  -1   4 -29 10.2546 7.36903   7
   1  -4  29-1.32470 6.26152   1
   1  -4  30 60.1829 11.6881   1
   1  -3 -31 19.2299 7.70496   7
   1  -3 -30 23.7220 7.43966   7
   1  -3 -29 30.3385 8.71148   7
   1  -3 -28 1.21135 5.62356   7
   1  -3 -27-1.16340 5.11410   7
   1  -3 -26 10.1467 5.82817   7
   1  -3 -25 27.2901 7.49852   7
   1  -3 -24 10.5960 5.93288   7
   1  -3 -23-3.38477 17.9995   2
   1  -3 -23 9.18744 5.26054   7
   1  -3 -22 42.8418 20.5619   2
   1  -3 -22 24.7983 6.63531   7
   1  -3 -21 18.3402 17.3168   2
   1  -3 -21 0.89910 4.17677   7
   1  -3 -20 91.2788 24.0404   2
   1  -3 -20 58.0642 9.29301   7
   1  -3 -19 112.765 23.4629   2
   1  -3 -19 71.6927 10.7288   7
   1  -3 -18 294.557 31.7107   7
   1  -3 -18 323.404 40.7352   2
   1  -3 -17 285.172 30.0652   7
   1  -3 -17 271.638 35.8349   2
   1  -3 -16 116.286 17.4555   2
   1  -3 -16 77.3855 11.0174   7
   1  -3 -15 177.338 20.8044   7
   1  -3 -15 226.992 25.3353   2
   1  -3 -14 144.682 16.5378   7
   1  -3 -13 322.135 33.1386   7
   1  -3 -12 79.6563 10.2868   7
   1  -3 -11 416.815 39.7976   7
  -1   3  11 384.617 38.1939   1
   1  -3 -11 388.076 38.3343   1
   1  -3 -10 2.02885 1.97213   1
  -1   3  10 1.06236 1.87911   1
  -1   3   9 1654.43 156.161   7
   1  -3  -9 1623.46 155.464   1
  -1   3   9 1628.41 155.394   1
  -1   3   8 755.531 70.5475   7
  -1   3   8 719.519 69.7820   1
   1  -3  -8 719.478 69.8369   1
  -1   3   7 931.853 92.5825   1
  -1   3   7 1007.79 93.2786   7
  -1   3   7 986.292 92.3015   8
   1  -3  -7 959.556 92.6522   1
  -1   3   6 25.1687 3.70575   8
   1  -3  -6 25.2878 3.75476   1
   1  -3  -6 21.9233 4.21168   7
  -1   3   6 30.1990 4.69141   7
  -1   3   6 22.3972 3.58683   1
  -1   3   5 1634.48 157.710   1
   1  -3  -5 1585.24 158.097   7
  -1   3   5 1825.38 158.355   7
  -1   3   5 1478.88 159.053   8
   1  -3  -5 1710.54 157.754   1
  -1   3   4 2498.38 237.964   1
   1  -3  -4 2378.71 238.249   7
  -1   3   4 2696.03 238.552   7
  -1   3   4 2315.25 238.747   8
   1  -3  -4 2540.40 237.511   8
   1  -3  -4 2538.09 237.981   1
   1  -3  -3 4.08558 3.61086   8
  -1   3   3 3.46128 3.84426   8
  -1   3   3 5.47092 2.24083   1
   1  -3  -3 6.46103 2.17677   1
  -1   3   3 6.60007 3.10742   7
   1  -3  -3 5.08213 2.64143   7
   1  -3  -2 1330.80 125.796   1
  -1   3   2 1319.06 125.808   1
  -1   3   2 1377.44 126.170   7
   1  -3  -2 1306.64 125.965   7
  -1   3   2 1276.72 126.081   8
   1  -3  -2 1296.73 127.777   8
  -1   3   1 127.874 13.3932   1
   1  -3  -1 136.114 13.4226   1
  -1   3   1 130.363 13.6664   7
   1  -3  -1 131.997 13.5468   7
   1  -3  -1 122.716 15.2376   8
  -1   3   1 119.276 13.7970   8
  -1   3   0 2169.90 205.034   1
   1  -3   0 2213.61 205.038   1
  -1   3   0 2134.85 205.165   7
   1  -3   0 2077.50 206.024   8
   1  -3   0 2147.96 205.000   7
  -1   3  -1 639.224 61.7214   1
  -1   3  -1 624.779 61.7477   7
   1  -3   1 666.653 61.7553   1
   1  -3   1 644.632 61.6230   7
   1  -3   1 608.927 62.7274   8
   1  -3   2 1.57893 2.59793   1
  -1   3  -2 3.96554 2.46900   7
   1  -3   2 3.39924 4.43098   8
   1  -3   2 3.26646 2.30462   7
   1  -3   3 20.5895 3.64775   1
   1  -3   3 15.1415 4.77958   8
  -1   3  -3 9.83119 3.21760   7
   1  -3   3 17.4829 3.26195   7
  -1   3  -4 1.69580 2.73129   7
   1  -3   4 5.11634 2.55018   7
  -1   3  -5 114.639 12.5078   7
  -1   3  -6 8.19912 3.01561   7
   1  -3   7 41.0002 6.22896   1
  -1   3  -7 49.1180 6.46328   7
   1  -3   8 1.80312 2.78148   1
  -1   3  -8 2.28972 2.90699   7
   1  -3   9 166.782 18.0237   1
  -1   3  -9 170.802 18.1398   7
   1  -3  10 27.6425 4.57444   1
  -1   3 -10 12.3414 3.93759   7
   1  -3  11 106.876 11.3136   2
   1  -3  11 88.6598 11.4907   1
  -1   3 -11 101.037 11.8696   7
   1  -3  12 88.0110 10.7648   2
   1  -3  12 92.4901 11.1874   1
  -1   3 -12 103.478 11.6801   7
  -1   3 -13 3.30841 3.12625   7
   1  -3  13 3.06329 3.13564   2
   1  -3  13-1.77446 3.30632   1
   1  -3  14 87.9436 11.1196   1
  -1   3 -14 90.5171 11.4232   7
   1  -3  15 11.8071 4.27792   1
  -1   3 -15 9.77489 4.27321   7
   1  -3  16 75.7859 10.1282   1
  -1   3 -16 73.1431 10.5004   7
   1  -3  17 78.0098 10.6469   1
  -1   3 -17 79.8975 11.1553   7
   1  -3  18 26.4669 5.85226   1
  -1   3 -18 32.7638 6.98885   7
   1  -3  19 55.2944 8.49221   1
  -1   3 -19 46.5236 8.91076   7
   1  -3  20 41.2252 8.17464   1
  -1   3 -20 67.3484 9.70395   7
   1  -3  21-1.71911 4.44507   1
  -1   3 -21 2.04518 4.31778   7
   1  -3  22-0.89552 4.01468   1
  -1   3 -22-3.20036 5.36435   7
   1  -3  23 2.79851 4.61867   1
  -1   3 -23-2.22953 4.80404   7
   1  -3  24 4.85696 4.75745   1
  -1   3 -24 4.63933 5.40206   7
   1  -3  25 10.1020 5.40722   1
  -1   3 -25 13.3082 5.99859   7
   1  -3  26 7.34841 5.05756   1
  -1   3 -26 1.25513 5.84282   7
   1  -3  27 25.0366 6.78871   1
  -1   3 -27 15.6600 7.29205   7
   1  -3  28 31.6169 7.75133   1
   1  -3  29-2.34265 6.54638   1
   1  -2 -31-5.53017 7.45988   7
   1  -2 -30-2.64248 6.34527   7
   1  -2 -29-1.26444 5.97030   7
   1  -2 -28 27.8217 7.89650   7
   1  -2 -27 26.5880 7.80501   7
   1  -2 -26 82.9713 12.4937   7
   1  -2 -25 21.2286 6.77307   7
   1  -2 -24 99.9480 13.8218   7
   1  -2 -23 42.7912 8.45832   7
   1  -2 -22 5.83742 4.45915   7
   1  -2 -22-2.58641 14.2807   2
   1  -2 -21 78.3262 11.6056   7
   1  -2 -21 103.184 21.0721   2
   1  -2 -20 6.77773 4.04919   7
   1  -2 -20 5.71062 13.2677   2
   1  -2 -19 39.0004 7.41541   7
   1  -2 -19 82.1860 20.3274   2
   1  -2 -18 75.6817 11.1169   7
   1  -2 -18 161.737 24.0443   2
   1  -2 -17 279.320 31.4107   2
   1  -2 -17 190.244 22.2274   7
   1  -2 -16 49.2819 7.79830   7
   1  -2 -16 55.8691 13.0296   2
   1  -2 -15 198.895 23.4427   2
   1  -2 -15 168.495 19.5303   7
   1  -2 -14 165.011 19.5577   7
   1  -2 -14 217.875 22.7409   2
   1  -2 -13 70.0447 9.29427   7
   1  -2 -12 60.7271 8.30968   7
   1  -2 -11 25.0435 5.26061   7
  -1   2  11 31.4849 4.29774   1
  -1   2  10 1057.39 103.116   1
   1  -2 -10 1126.45 104.304   7
   1  -2  -9 395.847 37.9844   1
  -1   2   9 384.572 37.8719   1
   1  -2  -9 389.804 39.0120   7
   1  -2  -8 59.4486 6.89098   1
  -1   2   8 58.0344 6.77431   1
  -1   2   8 66.4764 7.72273   7
   1  -2  -7 142.612 15.1601   1
  -1   2   7 148.945 15.1409   1
   1  -2  -7 154.555 15.8851   7
  -1   2   7 162.553 15.8750   7
  -1   2   6 25.9944 4.21800   7
  -1   2   6 29.3690 3.70209   1
   1  -2  -6 24.7920 3.59116   1
   1  -2  -6 22.8837 4.46981   7
  -1   2   5 1031.83 94.9572   7
   1  -2  -5 947.223 94.8356   7
   1  -2  -5 980.254 94.4287   1
  -1   2   5 1004.52 94.4374   1
  -1   2   4 757.396 68.2256   7
   1  -2  -4 675.245 68.0559   7
  -1   2   4 695.875 67.7015   1
   1  -2  -4 714.615 67.7403   1
   1  -2  -3 2600.79 254.656   7
  -1   2   3 2762.28 254.794   7
  -1   2   3 2725.38 254.386   1
   1  -2  -3 2649.03 254.379   1
   1  -2  -2 720.576 70.4307   7
  -1   2   2 735.063 70.5274   7
  -1   2   2 725.053 70.1738   1
   1  -2  -2 753.957 70.2025   1
   1  -2  -1 352.079 34.5144   7
  -1   2   1 368.505 34.6582   7
   1  -2  -1 324.733 34.6464   8
   1  -2  -1 360.983 34.3358   1
  -1   2   1 361.018 34.3366   1
   1  -2   0 868.411 83.9387   1
  -1   2   0 854.751 83.9140   1
   1  -2   0 916.150 84.3664   8
   1  -2   0 894.024 84.0626   7
  -1   2   0 876.479 84.1125   7
  -1   2  -1 408.333 38.8114   1
  -1   2  -1 389.291 38.8644   7
   1  -2   1 394.664 38.7758   7
   1  -2   1 409.589 38.8310   1
  -1   2  -2 2671.63 250.103   1
   1  -2   2 2577.00 250.025   7
  -1   2  -2 2661.84 250.116   7
   1  -2   3 270.912 25.8697   7
  -1   2  -3 254.106 25.8774   7
   1  -2   4 189.992 19.0661   7
  -1   2  -4 189.392 19.1296   7
   1  -2   5 257.398 26.6708   1
  -1   2  -5 285.287 26.8045   7
   1  -2   5 265.775 26.6026   7
  -1   2  -6 20.3765 3.78764   7
   1  -2   6 24.9562 4.12671   1
  -1   2  -7 1577.32 146.209   7
   1  -2   7 1487.74 146.022   1
  -1   2  -8 127.549 12.8445   7
   1  -2   8 111.336 12.4815   2
   1  -2   8 109.132 12.4447   1
   1  -2   9 94.0331 11.3039   2
  -1   2  -9 110.598 11.6994   7
   1  -2   9 100.477 11.3403   1
   1  -2  10 116.310 12.3734   2
   1  -2  10 93.5586 12.0199   1
  -1   2 -10 125.161 12.7905   7
   1  -2  11 0.44898 2.68216   1
   1  -2  11 3.14770 3.33490   2
  -1   2 -11-0.52786 2.94949   7
   1  -2  12 11.0430 3.48860   1
   1  -2  12 16.0301 4.81102   2
  -1   2 -12 16.8875 4.37530   7
  -1   2 -13 713.942 70.4747   7
   1  -2  13 654.200 69.9503   1
   1  -2  13 837.729 71.2754   2
  -1   2 -14 185.987 22.0160   7
   1  -2  14 189.166 21.6817   1
  -1   2 -15 195.866 23.8002   7
   1  -2  15 211.325 23.5306   1
   1  -2  16 155.397 17.2411   1
   1  -2  17 2.53597 3.42087   1
   1  -2  18 179.483 19.8578   1
   1  -2  19 0.69326 3.48468   1
   1  -2  20 1.45174 3.75622   1
   1  -2  21 2.26575 3.68850   1
   1  -2  22 13.2994 5.06727   1
   1  -2  23-1.63043 3.97763   1
   1  -2  24 6.78664 4.94661   1
   1  -2  25 5.29522 4.46347   1
   1  -2  26 10.1058 5.56852   1
  -1   2 -27 5.02287 5.82856   7
   1  -2  27-1.91561 4.95343   1
  -1   2 -28-1.32002 5.45770   7
  -1   2 -29 10.9282 6.42392   7
  -1   2 -30 5.65234 6.91030   7
   1  -1 -31 18.0452 7.18163   7
   1  -1 -30 6.65384 6.71748   7
   1  -1 -29 2.54142 5.80028   7
   1  -1 -28 1.21259 5.53141   7
   1  -1 -27 1.15967 5.19476   7
   1  -1 -26 32.0503 7.62752   7
   1  -1 -25 14.7624 6.18792   7
   1  -1 -24 35.2126 7.74326   7
   1  -1 -23 3.84842 4.70491   7
   1  -1 -22 5.58505 4.35257   7
   1  -1 -21 13.4303 5.04309   7
   1  -1 -20 26.5060 11.2927   2
   1  -1 -20 30.1867 6.56234   7
   1  -1 -19 51.2132 13.6906   2
   1  -1 -19 27.5120 6.50376   7
   1  -1 -18 173.969 21.4430   7
   1  -1 -18 316.775 31.2235   2
   1  -1 -17 374.420 41.9807   7
   1  -1 -17 646.781 52.7033   2
   1  -1 -16 548.328 47.1911   2
   1  -1 -16 340.127 37.7378   7
   1  -1 -15 762.058 64.3277   2
   1  -1 -15 542.848 58.0140   7
   1  -1 -14 191.393 21.5584   2
   1  -1 -14 159.125 18.3676   7
   1  -1 -13 81.8824 10.7406   2
   1  -1 -13 50.6407 8.07572   7
   1  -1 -12 5.44491 3.22425   7
   1  -1 -11 1470.57 141.105   7
   1  -1 -10 43.6303 6.45041   7
  -1   1  10 45.4568 5.74201   1
   1  -1  -9 6.12071 3.43457   7
  -1   1   9-0.26269 1.87004   1
   1  -1  -8 1528.35 144.347   7
  -1   1   8 1497.31 143.574   1
   1  -1  -7 69.3022 8.35337   7
   1  -1  -7 75.1461 8.79550   7
  -1   1   7 73.5076 7.86540   1
   1  -1  -7 72.6423 7.94081   1
   1  -1  -6 287.126 27.4857   1
  -1   1   6 273.121 27.4088   1
   1  -1  -6 278.624 27.8803   7
  -1   1   6 290.204 27.9147   7
  -1   1   5 1519.41 147.748   1
   1  -1  -5 1531.40 147.779   1
   1  -1  -5 1536.48 148.145   7
  -1   1   5 1674.28 148.202   7
  -1   1   4 1915.11 185.735   1
   1  -1  -4 1945.50 185.759   1
   1  -1  -4 1937.54 186.085   7
  -1   1   4 2069.05 186.127   7
   1  -1  -3 5785.04 548.631   1
  -1   1   3 5772.88 548.627   1
   1  -1  -3 5769.65 548.912   7
  -1   1   3 5877.49 548.926   7
  -1   1   2 251.149 23.9249   1
   1  -1  -2 244.915 23.9019   1
  -1   1   2 241.216 24.2104   7
   1  -1  -2 248.394 24.1709   7
  -1   1   1 188.670 17.8452   7
   1  -1  -1 177.328 17.7881   7
   1  -1  -1 174.673 17.5041   1
  -1   1   1 179.606 17.5308   1
   1  -1   0 3296.22 313.367   7
  -1   1   0 3375.76 313.407   7
  -1   1   0 3265.14 313.206   1
  -1   1  -1 884.952 84.3849   7
  -1   1  -2 383.697 37.0235   7
  -1   1  -3 225.769 23.3542   7
   1  -1   3 251.023 23.3717   1
   1  -1   4 44.1251 5.02927   1
  -1   1  -4 35.5812 4.82259   1
   1  -1   5 951.845 89.6794   1
  -1   1  -5 926.248 89.6289   1
   1  -1   6 921.977 86.1892   2
  -1   1  -6 869.969 85.7167   1
   1  -1   6 906.948 85.7795   1
   1  -1   7 250.860 26.6464   2
  -1   1  -7 259.485 26.1087   1
   1  -1   7 281.382 26.2335   1
   1  -1   8 334.979 34.6884   2
  -1   1  -8 336.000 33.9779   1
   1  -1   8 371.841 34.1979   1
   1  -1   9 290.628 28.9204   2
   1  -1   9 277.757 28.0624   1
   1  -1  10 585.904 54.6530   2
   1  -1  10 530.914 53.3017   1
   1  -1  11 3.73564 5.72464   2
  -1   1 -11 4.01691 3.71153   2
   1  -1  11-0.36973 2.42966   1
  -1   1 -12 352.127 36.6267   2
   1  -1  12 332.160 36.1795   1
  -1   1 -13 1.01070 3.48477   2
   1  -1  13 5.96459 2.55526   1
   1  -1  13 10.5551 7.97118   2
  -1   1 -14 190.358 21.2112   2
   1  -1  14 184.637 20.7206   1
  -1   1 -15 72.7207 9.31712   2
   1  -1  15 73.0681 8.71663   1
   1  -1  15 53.4392 10.2355   2
  -1   1 -16 19.2967 5.21408   2
   1  -1  16 35.0061 6.80417   2
   1  -1  16 29.2557 4.88789   1
  -1   1 -16 31.3614 5.76077   7
  -1   1 -17-0.60732 3.85006   2
   1  -1  17 4.34034 3.10615   1
  -1   1 -17 0.69345 3.16688   7
  -1   1 -18 3.13851 4.06220   2
  -1   1 -18 8.83610 4.27032   7
   1  -1  18 0.57175 3.32239   1
  -1   1 -19 65.3516 9.00468   7
   1  -1  19 55.9278 8.23440   1
  -1   1 -20 67.4761 9.76128   7
   1  -1  20 65.6318 9.05817   1
  -1   1 -21 158.178 17.5468   7
   1  -1  21 134.896 16.3900   1
   1  -1  22 72.6381 9.06697   1
  -1   1 -22 42.1998 8.84719   7
   1  -1  23 122.093 14.4582   1
  -1   1 -23 114.984 15.3476   7
   1  -1  24 11.9494 4.49805   1
  -1   1 -24 6.08997 4.94802   7
   1  -1  25-0.77297 4.27449   1
  -1   1 -25-5.32342 5.27845   7
   1  -1  26 19.3035 5.67529   1
  -1   1 -26 26.8344 7.31819   7
  -1   1 -27 42.2051 9.23860   7
  -1   1 -28 3.69218 5.62380   7
  -1   1 -29 60.4528 11.0627   7
  -1   1 -30 13.5304 7.11298   7
  -1   1 -31 41.2191 10.3312   7
   1   0 -31 2.79701 6.38362   7
   1   0 -30-1.33950 6.53205   7
   1   0 -29 11.5388 6.34542   7
   1   0 -28 1.22679 5.49542   7
   1   0 -27 1.17216 5.25071   7
  -1   0  26 8.65873 5.50868   1
   1   0 -26-1.11287 5.08448   7
  -1   0  25 2.76121 4.69898   1
   1   0 -25 2.12341 5.26191   7
  -1   0  24 4.38191 4.29556   1
   1   0 -24 5.05079 5.02087   7
  -1   0  23-0.84032 4.46491   1
   1   0 -23 1.92157 4.61084   7
   1   0 -22 6.39479 4.69723   7
   1   0 -21 70.4368 10.2752   7
   1   0 -20-0.82969 3.64714   7
   1   0 -19 79.0152 11.4707   7
   1   0 -19 109.805 14.4193   2
   1   0 -18 143.858 17.6490   7
   1   0 -18 176.142 20.7077   2
   1   0 -17 38.9269 9.27840   2
   1   0 -17 16.9266 5.00171   7
   1   0 -16 1515.18 118.055   2
   1   0 -16 1055.32 113.564   7
   1   0 -15 405.063 34.1966   2
   1   0 -15 240.176 28.1794   7
   1   0 -14 120.592 14.6832   7
   1   0 -14 172.200 20.2938   2
   1   0 -13 634.018 68.9353   7
   1   0 -13 966.354 73.6642   2
   1   0 -12 7.13625 5.67576   2
   1   0 -11 10.6425 4.78758   2
  -1   0   6 14.8686 2.92654   1
  -1   0   5 1501.23 142.714   1
  -1   0   4 489.426 46.7492   1
  -1   0   4 483.385 47.2505   8
   1   0  -3 157.314 17.1726   1
  -1   0   3 190.668 17.2746   1
  -1   0   3 187.659 17.7983   8
  -1   0   2 1288.03 128.923   1
  -1   0   2 1430.23 129.556   8
   1   0  -2 1447.91 129.418   8
   1   0   0 987.515 93.8438   7
   1   0   1 3079.22 284.911   7
  -1   0  -1 2923.19 284.802   1
   1   0   1 3042.50 284.811   1
   1   0   2 428.323 40.4705   7
   1   0   2 414.118 41.0065   2
   1   0   2 431.645 40.3699   1
  -1   0  -2 414.064 40.3428   1
   1   0   3 117.951 13.5883   2
  -1   0  -3 131.332 13.6670   2
   1   0   3 135.793 12.7300   1
  -1   0  -3 130.225 12.6935   1
   1   0   3 123.828 12.8222   7
  -1   0  -3 129.845 12.8448   7
  -1   0  -4 7.73995 1.98766   7
   1   0   4 6.64645 1.97263   7
   1   0   4 9.37561 3.82712   2
  -1   0  -4 9.53404 3.65155   2
  -1   0  -4 8.30346 1.82108   1
   1   0   4 11.0135 1.93330   1
  -1   0  -5 1009.42 96.1716   1
   1   0   5 1000.74 96.1792   1
  -1   0  -5 954.660 97.0880   2
   1   0   5 1047.18 97.3239   2
  -1   0  -5 1017.18 96.4443   7
   1   0   5 1035.38 96.4035   7
  -1   0  -6 306.911 30.6676   1
   1   0   6 302.532 30.6943   1
  -1   0  -6 300.490 31.7745   2
   1   0   6 352.160 32.5295   2
   1   0   6 326.745 30.9978   7
  -1   0  -6 345.089 31.1181   7
   1   0   7 736.694 72.4130   1
  -1   0  -7 754.619 73.5659   2
   1   0   7 860.781 74.5769   2
   1   0   7 717.695 72.6888   7
  -1   0  -7 796.945 72.8375   7
  -1   0  -8 6.98866 2.77596   7
   1   0   8 9.17550 2.41236   1
  -1   0  -8 10.9578 4.55531   2
   1   0   8 18.5390 7.28944   2
   1   0   8 11.8432 2.88345   7
   1   0   9 180.272 18.3333   1
  -1   0  -9 185.703 19.9257   2
  -1   0  -9 165.516 18.6881   7
  -1   0 -10 0.75016 2.48394   7
   1   0  10 5.04678 2.19672   1
   1   0  10 7.77206 8.45797   2
  -1   0 -10 4.71930 4.55953   2
   1   0  11 746.583 73.4715   1
  -1   0 -11 688.579 74.7933   2
  -1   0 -11 742.721 73.9274   7
   1   0  12 622.524 63.3101   1
  -1   0 -12 622.437 64.7330   2
  -1   0 -12 653.820 63.9026   7
   1   0  13 342.489 34.5131   1
  -1   0 -13 338.192 36.0418   2
  -1   0 -13 332.757 35.0185   7
   1   0  14 31.5227 7.54764   2
   1   0  14 27.0764 4.56834   1
  -1   0 -14 33.0701 6.62016   2
  -1   0 -14 32.9205 5.25648   7
   1   0  15 4.43406 2.67414   1
  -1   0 -15 7.84418 5.17513   2
  -1   0 -15 6.16623 3.17411   7
   1   0  16 5.17513 2.90411   1
  -1   0 -16 3.28479 4.65674   2
  -1   0 -16 3.00015 3.12612   7
   1   0  17 16.0395 3.71827   1
  -1   0 -17 24.7119 6.29733   2
  -1   0 -17 14.0628 4.01196   7
   1   0  18 51.5299 6.69398   1
  -1   0 -18 42.9390 8.52203   2
  -1   0 -18 41.4831 7.04121   7
   1   0  19 70.3038 8.38853   1
  -1   0 -19 60.4596 10.2045   2
  -1   0 -19 54.1291 8.62689   7
   1   0  20 2.16671 3.04322   1
  -1   0 -20 5.35011 3.68224   7
   1   0  21 35.9065 5.64766   1
  -1   0 -21 24.2427 5.86880   7
  -1   0 -22 146.186 15.6354   7
   1   0  22 107.744 13.9702   1
   1   0  23 88.3719 10.6562   1
  -1   0 -23 72.1955 11.1642   7
   1   0  24 4.58711 3.49061   1
  -1   0 -24 11.4142 5.47298   7
  -1   0 -25 37.1467 7.90581   7
  -1   0 -26 63.3529 10.6255   7
  -1   0 -27 8.88478 5.39532   7
  -1   0 -28 21.0290 7.32352   7
  -1   0 -29 23.2398 7.25376   7
  -1   0 -30 15.4332 6.89868   7
  -1   0 -31 72.8127 12.5755   7
   1   1 -31 19.8632 7.95873   7
   1   1 -30 44.8063 10.0740   7
   1   1 -29 16.9013 6.81908   7
   1   1 -28 47.2302 9.78162   7
  -1  -1  27-5.63454 5.84801   1
   1   1 -27-4.74813 5.62490   7
  -1  -1  26 11.8868 6.40946   1
   1   1 -26 18.1434 6.19224   7
  -1  -1  25 5.16250 4.96308   1
   1   1 -25 1.08136 5.28008   7
  -1  -1  24 7.90533 5.50446   1
  -1  -1  23 2.81873 4.79831   1
  -1  -1  22 16.9556 5.56473   1
  -1  -1  21 6.82308 4.39645   1
  -1  -1  20 67.6968 9.88931   1
   1   1 -17 11.2378 4.13325   2
   1   1 -16 20.9325 5.13683   2
   1   1 -15 6.54502 4.24991   2
   1   1 -14 129.674 14.9057   2
   1   1 -13 638.174 62.7348   2
   1   1 -12 182.249 17.0870   2
   1   1 -12 126.533 15.9132   7
   1   1 -11 205.422 18.3737   2
   1   1 -11 135.438 16.7881   7
   1   1 -10 4773.74 330.224   2
   1   1 -10 2867.64 328.421   7
   1   1  -9 489.112 43.7031   2
   1   1  -9 405.246 43.4638   7
   1   1  -8 3.48973 2.44728   7
   1   1  -7 258.324 25.2756   7
  -1  -1   7 246.746 25.3665   7
  -1  -1   6 397.326 38.6426   7
   1   1  -6 402.150 38.5935   7
  -1  -1   6 378.394 39.6145   8
   1   1  -5 1139.03 105.363   7
  -1  -1   5 1085.13 105.314   7
  -1  -1   5 1071.12 106.271   8
   1   1  -4 70.0945 7.96323   7
  -1  -1   4 84.1834 8.11442   7
  -1  -1   4 67.8851 9.56778   8
   1   1  -4 62.2484 9.28035   8
  -1  -1   3 1920.23 182.995   7
   1   1  -3 1943.60 182.970   7
  -1  -1   3 1885.61 184.082   8
   1   1  -3 1946.99 184.013   8
  -1  -1   2 5661.52 520.830   2
   1   1  -2 5681.20 520.893   2
   1   1  -2 5351.35 520.594   7
   1   1  -2 5445.58 520.689   7
  -1  -1   2 5425.54 522.153   8
   1   1  -1 1326.70 128.137   7
  -1  -1   1 1437.64 128.174   7
  -1  -1   1 1300.45 128.642   2
   1   1  -1 1270.20 128.669   2
   1   1   0 2281.21 216.118   2
  -1  -1   0 2266.11 216.055   2
   1   1   1 991.710 95.3359   2
  -1  -1  -3 61.4760 9.30759   2
   1   1   3 62.8007 6.69517   7
  -1  -1  -3 70.8406 6.73461   7
  -1  -1  -4 357.612 35.8465   2
   1   1   4 327.546 33.7052   7
  -1  -1  -4 361.417 33.7400   7
  -1  -1  -5 156.836 17.6927   2
   1   1   5 193.014 19.4405   2
   1   1   5 153.185 14.8575   7
  -1  -1  -5 147.725 14.7497   7
   1   1   5 144.305 14.3320   1
  -1  -1  -6 66.3098 6.93286   7
   1   1   6 58.8372 6.99788   7
   1   1   6 102.228 14.2949   2
   1   1   6 60.9980 6.38585   1
  -1  -1  -6 70.0048 10.7970   2
  -1  -1  -7 92.4038 9.75208   7
   1   1   7 91.3728 9.80051   7
   1   1   7 85.5736 9.16479   1
  -1  -1  -7 122.159 13.8571   2
  -1  -1  -8-1.04976 2.15099   7
   1   1   8-1.33936 10.6439   2
   1   1   8 1.98150 1.46120   1
   1   1   8 4.54808 2.27684   7
  -1  -1  -8-0.85744 6.52850   2
  -1  -1  -9 1051.89 94.1004   2
   1   1   9 922.149 91.2297   7
   1   1   9 915.494 90.5458   1
  -1  -1  -9 936.971 91.0878   7
  -1  -1 -10 229.144 21.9063   2
   1   1  10 254.877 23.2452   2
  -1  -1 -10 164.574 17.8164   7
   1   1  10 163.534 17.2300   1
  -1  -1 -11 78.5879 9.33643   7
   1   1  11 111.273 13.9014   2
   1   1  11 77.9177 8.76659   1
  -1  -1 -11 101.118 13.0350   2
   1   1  12 61.2770 7.07247   1
  -1  -1 -12 80.6667 11.5453   2
  -1  -1 -12 61.6525 7.83300   7
  -1  -1 -13 168.008 18.6450   7
   1   1  13 175.012 17.9755   1
  -1  -1 -14-1.09841 6.13769   2
   1   1  14 5.05311 2.07232   1
  -1  -1 -14-1.43874 2.74698   7
  -1  -1 -15 11.1075 6.35681   2
   1   1  15 10.0602 2.56010   1
  -1  -1 -15 11.3921 3.37006   7
  -1  -1 -16 212.799 22.6360   7
   1   1  16 215.722 21.8269   1
  -1  -1 -16 213.840 25.3537   2
  -1  -1 -17 44.8045 7.18009   7
   1   1  17 53.5692 6.62814   1
  -1  -1 -17 61.2203 10.5672   2
  -1  -1 -18 24.2171 5.11387   7
   1   1  18 27.6619 4.39098   1
  -1  -1 -18 17.7683 7.53066   2
  -1  -1 -19 78.0767 10.1197   7
   1   1  19 70.8373 8.98925   1
  -1  -1 -19 84.6006 12.9859   2
   1   1  20 75.3452 9.32698   1
  -1  -1 -20 74.2253 10.3616   7
  -1  -1 -20 88.4507 13.0216   2
  -1  -1 -21 9.92266 4.13636   7
   1   1  21 6.79980 3.07014   1
  -1  -1 -21 15.0125 7.11739   2
  -1  -1 -22 45.2901 8.19687   7
   1   1  22 53.2446 7.13546   1
  -1  -1 -23 11.9541 4.67529   7
  -1  -1 -24 28.8538 6.92155   7
  -1  -1 -25 59.8362 9.64297   7
  -1  -1 -26 18.0272 6.03611   7
  -1  -1 -27-2.11389 5.46946   7
  -1  -1 -28-1.11081 5.24492   7
  -1  -1 -29 11.7018 5.89845   7
  -1  -1 -30 6.16361 5.84849   7
  -1  -1 -31 21.9782 7.83789   7
  -1  -1 -32 4.06299 5.61126   7
  -1  -2  29 7.97566 7.28511   1
  -1  -2  28 23.1990 8.15528   1
  -1  -2  27 8.76596 6.25540   1
  -1  -2  26 3.61632 5.88716   1
  -1  -2  25 2.31844 5.38489   1
   1   2 -24-2.11101 5.68155   7
  -1  -2  24 1.11050 5.06497   1
   1   2 -23 31.1483 7.25611   7
  -1  -2  23 35.9808 7.99862   1
   1   2 -22 67.9311 10.5305   7
  -1  -2  22 70.7377 10.8623   1
   1   2 -21 7.26867 5.02236   7
  -1  -2  21 10.5900 5.37805   1
   1   2 -20 33.5349 7.23830   7
  -1  -2  20 50.3121 8.42982   1
   1   2 -19 5.69453 4.23862   7
  -1  -2  19 5.20366 4.69672   1
   1   2 -18 1.53529 3.66182   7
  -1  -2  18 14.8018 5.51507   1
  -1  -2  17 119.569 12.9264   1
   1   2 -17 79.7365 11.6253   7
  -1  -2  16 80.8008 9.93892   1
   1   2 -16 56.5149 9.01474   7
   1   2 -15 6.38100 3.53026   7
   1   2 -14 16.1240 4.23728   7
   1   2 -13 213.798 22.5461   7
   1   2 -12 0.51698 2.92228   7
   1   2 -11 805.806 78.2002   7
   1   2 -10 51.4274 6.87925   7
   1   2  -9 51.0424 6.72673   7
   1   2  -8 199.541 20.4551   7
   1   2  -7 667.648 64.4972   7
   1   2  -6 38.7918 5.55181   7
  -1  -2   6 45.6937 5.69957   7
  -1  -2   5 201.225 19.4718   7
  -1  -2   5 170.386 21.6122   8
   1   2  -5 192.835 19.3773   7
  -1  -2   4 945.761 96.1478   7
   1   2  -4 934.478 96.1031   7
  -1  -2   4 916.368 96.0798   2
  -1  -2   3 3265.32 326.707   7
   1   2  -3 3831.54 327.527   2
  -1  -2   3 3806.73 327.464   2
   1   2  -3 3288.32 326.693   7
  -1  -2   2 9.12184 5.16908   2
   1   2  -2 8.36609 1.85142   7
  -1  -2   2 5.79106 1.83275   7
   1   2  -2 5.33946 5.59060   2
   1   2  -1 1012.79 72.8893   2
  -1  -2   1 932.304 72.3376   2
   1   2  -1 710.436 72.3717   8
  -1  -2   1 703.300 69.5851   7
   1   2  -1 711.950 69.5610   7
  -1  -2   0 80.8786 15.1997   8
   1   2   0 63.7864 12.8508   8
  -1  -2   0 89.3969 11.9384   2
   1   2   0 94.3692 12.7127   2
   1   2   1 626.521 49.2679   2
  -1  -2  -1 569.966 48.5911   2
   1   2   1 366.502 48.3201   8
  -1  -2  -1 391.270 46.7724   8
   1   2   2 11.4127 5.95521   8
  -1  -2  -2 22.4087 3.66109   8
  -1  -2  -2 49.4417 10.8646   2
   1   2   2 37.1336 9.65768   2
  -1  -2  -2 20.8713 2.51276   1
   1   2   3 63.7191 6.90968   8
  -1  -2  -3 57.9492 6.69883   8
  -1  -2  -4 227.576 22.1325   7
   1   2   4 240.585 22.7084   8
   1   2   4 226.803 22.2246   7
  -1  -2  -5 7278.28 724.597   7
   1   2   5 8924.70 728.313   2
   1   2   5 7657.69 724.716   7
  -1  -2  -6 216.966 22.0123   7
   1   2   6 284.356 26.3503   2
  -1  -2  -6 313.961 29.2272   2
   1   2   6 217.852 22.1841   7
  -1  -2  -7 235.611 25.2067   7
   1   2   7 258.425 25.4585   7
   1   2   8 600.243 55.2422   1
  -1  -2  -8 525.330 55.7999   7
   1   2   8 555.197 56.0375   7
   1   2   9 304.795 29.1043   1
  -1  -2  -9 272.889 29.6678   7
   1   2   9 318.182 30.0965   7
   1   2  10 223.209 20.9886   1
  -1  -2 -10 267.811 27.9842   2
  -1  -2 -10 192.612 21.5414   7
   1   2  11 301.209 25.5820   1
  -1  -2 -11 238.880 26.0716   7
   1   2  11 236.750 25.3222   1
   1   2  12 31.0743 3.89036   1
  -1  -2 -12 49.3440 11.9749   2
  -1  -2 -12 32.3780 4.77979   7
  -1  -2 -13 287.008 28.1165   7
   1   2  13 264.578 27.1368   1
   1   2  14 2.25442 1.65050   1
  -1  -2 -14 2.68553 2.59623   7
  -1  -2 -14-3.19537 7.79244   2
  -1  -2 -15 58.1504 7.47963   7
   1   2  15 69.9426 6.87671   1
   1   2  15 45.7430 6.25959   1
  -1  -2 -15 61.6549 13.0553   2
   1   2  16 2.21829 1.83598   1
  -1  -2 -16 8.14084 8.98556   2
  -1  -2 -16-2.61012 2.46454   7
  -1  -2 -17 4.94621 7.94396   2
   1   2  17 10.0019 2.42868   1
  -1  -2 -17 3.92757 3.02660   7
  -1  -2 -18 29.7754 10.0401   2
   1   2  18 17.1452 3.36292   1
  -1  -2 -18 21.0506 4.46026   7
   1   2  19 5.35750 2.38516   1
  -1  -2 -19 5.76913 3.60731   7
  -1  -2 -20 154.417 18.1571   7
   1   2  20 163.225 17.0698   1
  -1  -2 -20 188.059 23.4847   2
  -1  -2 -21-8.28202 8.80154   2
  -1  -2 -21 0.72858 3.55474   7
  -1  -2 -22 39.3491 10.8313   2
  -1  -2 -22 42.4957 7.44242   7
  -1  -2 -23 30.2279 6.23765   7
  -1  -2 -24 25.8981 5.99083   7
  -1  -2 -25 4.55991 4.98993   7
  -1  -2 -26 139.464 17.3100   7
  -1  -2 -27 3.04045 4.79303   7
  -1  -2 -28 7.45816 4.91009   7
  -1  -2 -29 1.12244 5.12021   7
  -1  -2 -30 9.46025 6.42750   7
  -1  -2 -31 13.6868 6.73622   7
  -1  -2 -32 7.85856 5.34674   7
  -1  -3  30 55.5591 11.5139   1
   1   3 -30 38.7955 9.92090   7
  -1  -3  29 13.1244 7.59575   1
   1   3 -29 6.89987 6.68427   7
  -1  -3  28 178.225 18.6787   1
   1   3 -28 76.5629 14.7128   7
  -1  -3  27 26.0302 8.53601   1
   1   3 -27 20.1910 7.11901   7
  -1  -3  26 2.65334 6.26519   1
   1   3 -26 1.20278 5.18610   7
  -1  -3  25 30.8185 8.47568   1
   1   3 -25 12.6420 6.36608   7
  -1  -3  24 24.7911 7.46176   1
   1   3 -24 19.6793 6.78588   7
  -1  -3  23-1.18981 5.80194   1
   1   3 -23-1.04238 4.66948   7
  -1  -3  22 15.9624 7.09419   1
   1   3 -22-0.99137 4.45238   7
  -1  -3  21 57.6895 9.83968   1
   1   3 -21 47.1818 8.71924   7
  -1  -3  20 35.2070 7.83706   1
   1   3 -20 28.6948 6.90468   7
  -1  -3  19 269.314 27.5666   1
   1   3 -19 224.570 26.3261   7
  -1  -3  18 202.197 22.1210   1
   1   3 -18 178.508 21.0211   7
  -1  -3  17 220.373 22.7790   1
   1   3 -17 180.884 21.5308   7
  -1  -3  16 0.83718 4.14564   1
   1   3 -16 0.71661 3.43960   7
  -1  -3  15 1.58011 4.16228   1
   1   3 -15 6.74399 3.55940   7
  -1  -3  14 11.1439 4.35614   1
   1   3 -14 13.2730 4.13204   7
  -1  -3  13 71.0712 9.46735   1
   1   3 -13 60.1947 8.56138   7
  -1  -3  12 54.0795 8.10118   1
   1   3 -12 60.9713 7.98411   7
  -1  -3  11 341.995 32.6489   1
   1   3 -11 297.870 31.9275   7
  -1  -3  10 933.960 87.6083   1
   1   3 -10 875.760 87.0553   7
  -1  -3   9 411.484 40.3972   1
   1   3  -9 395.976 39.8271   7
   1   3  -8 383.875 37.9192   7
   1   3  -7 146.640 15.4141   7
  -1  -3   6 594.106 51.7769   2
  -1  -3   6 493.940 51.2361   7
   1   3  -6 519.520 51.3095   7
   1   3  -5 48.2771 5.99175   7
  -1  -3   5 50.2012 5.99646   7
  -1  -3   5 46.0159 6.43161   1
   1   3  -5 41.7085 9.23353   8
  -1  -3   5 65.5098 8.69800   2
   1   3  -4 282.873 31.1362   8
  -1  -3   4 303.175 28.8641   1
  -1  -3   4 266.230 28.3133   7
   1   3  -4 281.359 28.3732   7
  -1  -3   3 303.355 29.5531   1
   1   3  -3 290.075 29.0987   7
  -1  -3   3 288.030 29.1026   7
   1   3  -3 295.421 32.0657   8
  -1  -3   3 283.627 32.9760   8
  -1  -3   2 96.1032 10.3643   7
   1   3  -2 97.9258 10.3905   7
   1   3  -2 103.103 14.1572   8
  -1  -3   2 92.3743 15.0421   8
  -1  -3   2 113.177 10.9746   1
  -1  -3   1 194.537 18.6525   7
   1   3  -1 207.933 23.2143   8
  -1  -3   1 178.839 24.2280   8
  -1  -3   1 190.109 19.1361   1
   1   3  -1 184.251 18.6642   7
  -1  -3   0 1572.41 151.882   7
  -1  -3   0 1623.28 152.381   1
   1   3   0 1582.35 151.918   7
  -1  -3   0 1631.53 157.662   8
   1   3   0 1623.10 155.688   8
  -1  -3  -1 114.953 11.7422   1
  -1  -3  -1 150.449 18.3069   2
  -1  -3  -1 113.965 18.5327   8
   1   3   1 99.5247 17.5376   8
  -1  -3  -2 713.382 68.7284   8
   1   3   2 623.874 71.4180   8
  -1  -3  -2 677.620 66.4926   1
   1   3   3 20.0812 10.7554   8
  -1  -3  -3 52.3205 5.64845   8
   1   3   3 36.2596 4.35183   1
  -1  -3  -3 42.1590 4.46747   1
  -1  -3  -3 43.5460 12.8212   2
  -1  -3  -4 18.8520 3.28743   8
  -1  -3  -4 18.3703 2.39650   7
   1   3   4 14.3015 5.33403   8
  -1  -3  -4 13.8850 2.20203   1
   1   3   4 18.0903 2.20846   1
  -1  -3  -4 18.3559 2.32113   7
   1   3   5 55.9532 5.90636   1
  -1  -3  -5 52.1675 6.15909   7
   1   3   5 70.9485 7.32098   8
  -1  -3  -5 66.5818 5.96213   1
  -1  -3  -5 55.2570 6.30954   7
  -1  -3  -6 19.0910 12.4245   2
   1   3   6 16.7140 3.24977   8
  -1  -3  -6 15.0711 2.55793   7
  -1  -3  -6 15.8042 2.48235   7
   1   3   7 119.003 11.8816   8
  -1  -3  -7 117.017 11.4478   7
  -1  -3  -7 96.0064 11.1480   7
  -1  -3  -8 817.562 74.6208   7
  -1  -3  -8 714.688 74.3843   7
   1   3   9 163.543 15.6395   1
  -1  -3  -9 155.110 16.5569   7
  -1  -3  -9 157.042 16.4194   7
   1   3  10 202.061 19.1020   1
  -1  -3 -10 178.067 19.8687   7
   1   3  11 107.496 10.4988   1
  -1  -3 -11 96.3881 11.3043   7
  -1  -3 -12 66.4949 15.8163   2
   1   3  12 55.8203 5.76000   1
  -1  -3 -12 46.8687 6.64268   7
   1   3  13 207.201 20.2036   1
  -1  -3 -13 194.445 21.1370   7
   1   3  14 372.024 34.5249   1
  -1  -3 -14 313.250 35.3253   7
   1   3  15 93.5970 10.6396   1
   1   3  15 122.915 11.0156   1
  -1  -3 -15 94.8541 11.7163   7
  -1  -3 -16 82.2307 16.2409   2
   1   3  16 64.2380 7.07925   1
  -1  -3 -16 64.1781 8.33109   7
   1   3  17-0.23446 1.59163   1
  -1  -3 -17-1.07465 2.74008   7
  -1  -3 -17 2.19848 11.3691   2
   1   3  18 2.84999 1.79754   1
  -1  -3 -18-4.37560 10.1564   2
  -1  -3 -18 0.57520 3.10242   7
  -1  -3 -19 58.3624 8.23028   7
  -1  -3 -20 26.3257 11.0694   2
  -1  -3 -20 8.52032 3.95637   7
  -1  -3 -21-8.81652 11.5605   2
  -1  -3 -21-2.79127 3.41916   7
  -1  -3 -22 134.376 19.6329   2
  -1  -3 -22 87.3853 12.1263   7
  -1  -3 -23 165.249 25.2235   2
  -1  -3 -23 170.701 19.4492   7
  -1  -3 -24 2.12287 11.2898   2
  -1  -3 -24 5.83690 4.39957   7
  -1  -3 -25 26.4397 6.39288   7
  -1  -3 -26 47.4037 8.52724   7
  -1  -3 -27 1.96054 4.55361   7
  -1  -3 -28-3.09681 5.04143   7
  -1  -3 -29 8.68714 5.43882   7
  -1  -3 -30 1.14272 4.72463   7
  -1  -3 -31 26.4674 7.88489   7
  -1  -3 -32-5.06210 6.09183   7
  -1  -4  30-4.88562 7.57284   1
  -1  -4  29 47.8708 10.4245   1
   1   4 -29 5.73044 6.62656   7
  -1  -4  28 60.3999 12.0054   1
   1   4 -28 41.3040 9.93163   7
  -1  -4  27 7.50991 7.24482   1
   1   4 -27 7.92959 6.38423   7
  -1  -4  26 114.930 16.5232   1
   1   4 -26 90.8162 14.7341   7
  -1  -4  25 130.924 17.0708   1
   1   4 -25 92.8951 15.1253   7
  -1  -4  24 13.5721 7.58351   1
   1   4 -24-3.46226 5.26710   7
  -1  -4  23 32.7268 8.49999   1
   1   4 -23 8.82310 5.58113   7
  -1  -4  22 78.1968 12.4469   1
   1   4 -22 63.0312 10.8291   7
  -1  -4  21 14.5592 6.66574   1
   1   4 -21 4.99464 5.44074   7
  -1  -4  20 39.5954 8.53957   1
   1   4 -20 33.2248 7.32399   7
  -1  -4  19 18.8869 6.91205   1
   1   4 -19 17.1103 5.89718   7
  -1  -4  18 64.6591 10.6523   1
   1   4 -18 47.7739 8.59951   7
  -1  -4  17 387.810 41.1076   1
   1   4 -17 390.557 40.2056   7
  -1  -4  16 63.0269 10.2551   1
   1   4 -16 67.0732 9.54898   7
  -1  -4  15 280.712 28.9547   1
   1   4 -15 252.357 27.9015   7
  -1  -4  14 85.9373 10.9987   1
   1   4 -14 66.2421 9.76754   7
  -1  -4  13 117.119 13.5441   1
   1   4 -13 95.6620 12.3802   7
   1   4 -12 31.3360 5.61510   7
  -1  -4  12 33.0752 6.27851   1
   1   4 -11 25.3408 5.07867   7
  -1  -4  11 28.8856 5.93005   1
   1   4 -10 4.58333 3.00830   7
  -1  -4   9 31.7944 4.49343   2
   1   4  -9 33.8675 5.34149   7
  -1  -4   8 216.154 20.8158   2
   1   4  -8 179.680 20.1142   7
  -1  -4   7 195.286 19.4353   2
  -1  -4   7 164.002 18.1035   1
   1   4  -7 156.835 17.4036   7
   1   4  -6 772.799 81.8626   7
  -1  -4   6 828.398 82.4993   1
   1   4  -5 23.4134 3.89951   7
  -1  -4   5 19.7986 3.68121   7
  -1  -4   5 22.4426 4.51387   1
   1   4  -5 23.6314 7.29938   8
  -1  -4   4 151.062 16.1323   7
   1   4  -4 158.171 19.6226   8
  -1  -4   4 203.329 21.6107   2
  -1  -4   4 152.893 16.7838   1
   1   4  -4 165.159 16.3061   7
   1   4  -3 7.35318 2.28243   7
  -1  -4   3 8.14531 2.15367   7
  -1  -4   3 7.48230 3.03311   1
   1   4  -3 10.0086 7.40891   8
  -1  -4   3 16.1731 8.34611   2
   1   4  -2 46.0530 5.58941   7
  -1  -4   2 50.2432 5.54271   7
   1   4  -2 50.6844 10.3579   8
  -1  -4   2 67.8686 11.1257   2
  -1  -4   2 45.9306 6.14173   1
   1   4  -1 22.1884 3.16927   7
   1   4  -1 23.0806 8.28742   8
  -1  -4   1 23.5686 3.08389   7
  -1  -4   1 33.3739 8.93379   2
  -1  -4   1 24.3000 3.90595   1
   1   4   0 11.0312 2.19762   7
  -1  -4   0 12.5666 2.00813   7
   1   4   0 22.1869 8.99409   8
  -1  -4   0 13.5305 2.89429   1
  -1  -4   0 11.9847 6.87117   2
  -1  -4  -1 76.1567 8.53434   1
  -1  -4  -1 108.338 14.0770   2
  -1  -4  -1 85.2114 8.04735   7
   1   4   1 73.1919 8.13973   7
   1   4   1 64.7238 13.0456   8
  -1  -4  -2 97.4777 15.1908   2
  -1  -4  -2 92.5141 14.7220   8
   1   4   2 90.0439 16.1662   8
   1   4   2 96.9685 9.75472   7
   1   4   2 87.7481 9.90243   1
  -1  -4  -2 99.9592 10.0918   1
  -1  -4  -2 99.6498 9.57078   7
  -1  -4  -3 156.391 15.9325   7
  -1  -4  -3 204.013 18.4590   8
  -1  -4  -3 218.087 23.4367   2
   1   4   3 157.019 23.1081   8
   1   4   3 177.125 16.0722   7
  -1  -4  -3 164.831 16.3218   1
   1   4   3 146.411 16.1709   1
  -1  -4  -4 549.754 51.9531   1
  -1  -4  -4 692.816 59.1890   2
   1   4   4 511.056 51.8489   1
   1   4   4 515.026 51.6997   7
  -1  -4  -4 559.131 51.8123   7
  -1  -4  -4 664.872 53.0322   8
   1   4   4 433.063 57.1356   8
  -1  -4  -5 18.7543 2.69287   7
  -1  -4  -5 14.4732 2.37345   1
  -1  -4  -5 17.9392 11.6185   2
  -1  -4  -5 23.9315 3.79900   8
   1   4   5 17.2661 2.50212   1
   1   4   5 8.63615 8.91651   8
   1   4   6 92.9455 9.13994   1
  -1  -4  -6 86.5810 9.39446   7
  -1  -4  -6 86.6647 9.44317   7
   1   4   6 86.1638 12.0492   8
  -1  -4  -6 94.9646 9.17466   1
  -1  -4  -7 177.973 16.1603   1
  -1  -4  -7 148.496 16.4724   7
   1   4   7 159.606 16.1002   1
  -1  -4  -7 167.349 16.6690   7
   1   4   7 183.646 17.9099   8
  -1  -4  -8 809.433 72.2872   1
   1   4   8 734.792 72.2395   1
  -1  -4  -8 690.843 72.7522   7
  -1  -4  -8 724.901 72.9004   7
   1   4   8 823.930 73.5428   8
  -1  -4  -9 4.74786 12.4867   2
   1   4   9 9.48543 1.61138   1
   1   4   9 8.71818 2.91425   8
  -1  -4  -9 11.2719 1.67244   1
  -1  -4  -9 10.7363 2.60186   7
  -1  -4  -9 15.5380 2.76507   7
   1   4  10 17.5043 2.22743   1
  -1  -4 -10 21.1318 3.26513   7
   1   4  10 14.9321 3.65289   8
  -1  -4 -10 17.6070 3.53436   7
  -1  -4 -10 12.6409 13.0000   2
   1   4  11 61.2598 6.23492   1
  -1  -4 -11 57.8493 7.17844   7
  -1  -4 -12 11.1168 2.71792   7
   1   4  12 9.17698 1.60984   1
  -1  -4 -13 416.933 43.4674   7
   1   4  13 445.894 42.4506   1
  -1  -4 -14 132.921 23.0351   2
  -1  -4 -14 114.381 12.8228   7
  -1  -4 -15 176.413 25.2083   2
  -1  -4 -15 118.217 13.6921   7
  -1  -4 -16 318.469 33.8094   7
  -1  -4 -16 504.462 47.0783   2
  -1  -4 -17 26.8510 14.6043   2
  -1  -4 -17 21.8482 4.54444   7
  -1  -4 -18 324.870 35.6254   2
  -1  -4 -18 207.402 23.1256   7
  -1  -4 -19 134.837 22.2664   2
  -1  -4 -19 78.2232 10.4536   7
  -1  -4 -20 22.0722 13.7753   2
  -1  -4 -20 18.4244 4.82098   7
  -1  -4 -21 10.9227 13.1041   2
  -1  -4 -21-1.35132 3.95015   7
  -1  -4 -22 75.3773 10.8310   7
  -1  -4 -22 174.486 24.0414   2
  -1  -4 -23 56.3899 8.96505   7
  -1  -4 -23 76.7416 18.8374   2
  -1  -4 -24 63.8102 9.85696   7
  -1  -4 -24 102.953 21.2336   2
  -1  -4 -25 93.3846 13.1507   7
  -1  -4 -25 133.302 21.9268   2
  -1  -4 -26 0.90439 4.61226   7
  -1  -4 -27-7.62810 5.55993   7
  -1  -4 -28 8.03290 5.24785   7
  -1  -4 -29 1.05834 4.91321   7
  -1  -4 -30 6.67404 5.20125   7
  -1  -4 -31 1.16959 4.93968   7
  -1  -4 -32-1.23028 5.90498   7
  -1  -5  29 6.87750 7.72764   1
  -1  -5  28 5.00465 8.08120   1
   1   5 -28 17.3147 7.43969   7
  -1  -5  27 40.7244 10.4881   1
   1   5 -27 32.0717 9.22523   7
  -1  -5  26 3.16667 7.22134   1
   1   5 -26-1.35015 6.37401   7
  -1  -5  25 67.7675 12.8480   1
   1   5 -25 55.3308 11.5126   7
  -1  -5  24 29.7363 9.70457   1
   1   5 -24 37.9777 9.10476   7
  -1  -5  23 22.9712 8.72900   1
   1   5 -23 20.9982 6.97931   7
  -1  -5  22 1.38244 7.25140   1
   1   5 -22 3.34402 5.43963   7
  -1  -5  21-1.32871 6.37623   1
   1   5 -21 1.06439 4.67778   7
  -1  -5  20 63.7263 11.4790   1
   1   5 -20 54.8823 9.73961   7
  -1  -5  19 1.21919 5.49963   1
   1   5 -19 12.5721 5.44173   7
  -1  -5  18 2.33015 5.76999   1
   1   5 -18 0.92047 4.12445   7
  -1  -5  17 4.44715 5.26884   1
   1   5 -17 5.24516 4.66762   7
  -1  -5  16 35.9805 7.85058   1
   1   5 -16 24.8467 6.37798   7
  -1  -5  15 49.2415 8.75806   1
   1   5 -15 35.2252 6.96965   7
   1   5 -14 203.963 23.5828   7
  -1  -5  14 236.903 24.8586   1
   1   5 -13 136.110 15.8389   7
   1   5 -12 10.4208 3.97254   7
   1   5 -11 205.909 20.1259   7
  -1  -5  11 175.345 18.0793   2
   1   5 -10 2.86868 2.88466   7
  -1  -5  10-1.82279 3.40248   2
  -1  -5   9 10.2195 5.63662   2
  -1  -5   9 2.09255 3.57146   1
   1   5  -9 2.64799 2.90511   7
  -1  -5   8 50.2281 9.79298   2
  -1  -5   8 30.5978 5.84972   1
   1   5  -8 27.9820 5.04866   7
   1   5  -7 97.4569 11.5403   7
  -1  -5   7 93.7257 12.0755   1
  -1  -5   6 211.137 22.7536   1
   1   5  -6 200.169 22.0006   7
   1   5  -5 5.35216 2.72103   7
  -1  -5   5 10.9218 3.70809   1
   1   5  -5 16.8070 7.64865   8
   1   5  -4 43.2949 9.97318   8
  -1  -5   4 48.6678 6.20772   7
  -1  -5   4 77.2967 12.5439   2
   1   5  -4 50.7638 6.45016   7
  -1  -5   4 59.0869 7.37349   1
  -1  -5   3 87.1422 9.81551   7
  -1  -5   3 94.5390 10.6873   1
   1   5  -3 83.7459 13.8285   8
   1   5  -3 95.3133 10.0684   7
  -1  -5   3 110.526 15.5490   2
  -1  -5   2 7.70209 2.08315   7
   1   5  -2 9.35333 7.49574   8
   1   5  -2 4.18375 2.09766   7
  -1  -5   2 6.03538 2.83436   1
  -1  -5   2 8.31687 6.96952   2
   1   5  -1 58.4073 6.65712   7
   1   5  -1 39.1208 10.4537   8
  -1  -5   1 80.7687 12.2234   2
  -1  -5   1 49.8684 7.00680   1
  -1  -5   1 62.8775 6.46226   7
  -1  -5   0 59.1504 6.31537   7
  -1  -5   0 55.8780 10.9785   2
   1   5   0 62.1834 11.7588   8
  -1  -5   0 54.2336 6.96482   1
   1   5   0 58.8432 6.57486   7
  -1  -5  -1 0.64339 1.35857   7
   1   5   1 1.41189 1.83696   7
   1   5   1 6.41013 7.81455   8
  -1  -5  -1 3.19623 2.02927   1
  -1  -5  -1 1.29906 6.43342   2
  -1  -5  -2 2.71860 7.12636   2
  -1  -5  -2 0.14346 1.02724   7
   1   5   2 9.30012 8.79567   8
   1   5   2 0.19001 1.55369   7
   1   5   2-0.25708 1.75877   1
  -1  -5  -2 0.29505 1.66763   1
   1   5   3 284.204 34.5124   8
  -1  -5  -3 299.602 29.2779   1
   1   5   3 252.930 29.0208   1
   1   5   3 321.460 28.9902   7
  -1  -5  -3 318.433 35.1436   2
  -1  -5  -3 311.028 28.7843   7
   1   5   4 14.5860 10.3142   8
  -1  -5  -4 21.1625 2.64325   7
   1   5   4 21.0570 2.81133   7
  -1  -5  -4 13.1818 2.79207   1
   1   5   4 16.8366 2.92382   1
  -1  -5  -4 21.1736 10.6455   2
  -1  -5  -5 8.91693 9.37683   2
  -1  -5  -5 7.32493 1.89658   7
  -1  -5  -5 9.25265 2.01028   1
   1   5   5 8.75607 10.5895   8
   1   5   5 7.13971 1.86431   1
   1   5   5 6.74431 1.75897   7
   1   5   6 229.626 23.9118   1
  -1  -5  -6 252.489 24.0814   7
   1   5   6 188.796 30.3425   8
  -1  -5  -6 255.937 24.0390   1
  -1  -5  -7 66.2505 6.48618   1
   1   5   7 57.1814 6.37702   1
  -1  -5  -7 52.5042 6.61744   7
   1   5   7 29.2730 12.4418   8
  -1  -5  -7 64.3753 6.78205   7
   1   5   8 173.992 18.2597   1
  -1  -5  -8 212.112 18.4248   1
  -1  -5  -8 178.853 18.7067   7
  -1  -5  -8 184.073 18.7698   7
   1   5   8 174.293 22.2953   8
   1   5   9 1.36338 1.23285   1
  -1  -5  -9 1.50410 2.05525   7
  -1  -5  -9 4.10307 1.35162   1
  -1  -5  -9-2.57274 12.5458   2
   1   5   9-0.71814 4.59645   8
  -1  -5  -9 4.67199 2.14495   7
   1   5  10 8.19109 1.53282   1
  -1  -5 -10 5.15650 2.36623   7
  -1  -5 -10 7.75649 1.65403   1
   1   5  10 6.47829 3.61448   8
  -1  -5 -10 7.32111 2.41454   7
  -1  -5 -11 266.222 23.5802   1
  -1  -5 -11 231.060 24.3840   7
   1   5  11 245.810 25.0704   8
   1   5  11 225.933 23.4434   1
  -1  -5 -12 19.6702 3.47550   7
   1   5  12 18.6668 4.14207   8
  -1  -5 -12 25.2689 15.0237   2
  -1  -5 -13 36.9643 5.29044   7
   1   5  13 41.4470 6.10365   8
  -1  -5 -13 61.9394 20.0139   2
   1   5  14 9.61838 3.65921   8
  -1  -5 -14 3.32222 13.4473   2
  -1  -5 -14 6.13458 2.45811   7
   1   5  15 32.8492 5.57375   8
  -1  -5 -15 26.0106 4.77536   7
  -1  -5 -16 68.8216 8.71763   7
  -1  -5 -16 74.8910 20.1311   2
  -1  -5 -17 14.9431 3.91731   7
  -1  -5 -17 16.3891 15.7935   2
  -1  -5 -18 2.24283 2.98927   7
  -1  -5 -18 12.9701 15.8111   2
  -1  -5 -19 67.3100 9.26040   7
  -1  -5 -19 107.853 23.3284   2
  -1  -5 -20 66.6746 9.16259   7
  -1  -5 -20 71.9426 20.3410   2
  -1  -5 -21 38.2974 6.68324   7
  -1  -5 -21 19.9670 15.8179   2
  -1  -5 -22 2.80106 3.47264   7
  -1  -5 -22-9.98239 14.6248   2
  -1  -5 -23 4.46035 3.70610   7
  -1  -5 -23 6.56866 14.7153   2
  -1  -5 -24 30.7250 6.27316   7
  -1  -5 -24 22.5517 17.1254   2
  -1  -5 -25 4.99567 4.68019   7
  -1  -5 -25 9.78391 12.8917   2
  -1  -5 -26 0.88351 4.31154   7
  -1  -5 -26 12.7115 13.6961   2
  -1  -5 -27 0.93163 4.75121   7
  -1  -5 -28 10.7910 5.76293   7
  -1  -6  27 83.1679 15.4949   1
   1   6 -27 76.7854 13.5094   7
  -1  -6  26 1.71305 7.08133   1
   1   6 -26-2.74174 7.08971   7
  -1  -6  25 235.458 27.9003   1
   1   6 -25 195.602 25.6162   7
  -1  -6  24 3.20204 7.20144   1
   1   6 -24 10.1815 6.43107   7
  -1  -6  23 13.9930 7.99150   1
   1   6 -23 8.57280 6.32531   7
  -1  -6  22-3.00492 7.22417   1
   1   6 -22-5.87424 6.17593   7
  -1  -6  21 29.0185 8.48233   1
   1   6 -21 24.7714 7.10868   7
  -1  -6  20 73.8240 12.7278   1
   1   6 -20 71.1589 11.3839   7
  -1  -6  19 34.6477 9.50881   1
   1   6 -19 36.0446 7.85426   7
  -1  -6  18 72.6157 11.9192   1
   1   6 -18 57.9219 9.98454   7
  -1  -6  17 29.1939 8.31213   1
   1   6 -17 28.9386 6.85753   7
  -1  -6  16 15.0444 7.09301   1
   1   6 -16 12.4119 4.81310   7
   1   6 -15 8.38822 4.58408   7
   1   6 -14 107.023 13.5508   7
   1   6 -13 1.49169 3.80568   7
  -1  -6  12 72.6517 10.8726   1
   1   6 -12 72.8320 9.89756   7
  -1  -6  11 73.6585 10.3560   1
   1   6 -11 61.5787 9.09003   7
  -1  -6  10 2.47596 4.14789   1
   1   6 -10-0.61107 2.97948   7
  -1  -6   9 7.29633 7.89501   2
  -1  -6   9 13.1648 4.56737   1
   1   6  -9 7.92872 3.46586   7
  -1  -6   8 83.4547 10.5942   1
   1   6  -8 66.6524 9.39791   7
   1   6  -7 63.7444 8.62347   7
  -1  -6   7 64.8346 9.51130   1
   1   6  -6 618.899 62.0892   7
  -1  -6   6 600.491 62.7221   1
  -1  -6   5 525.421 56.7137   1
   1   6  -5 583.240 56.2390   7
   1   6  -5 543.851 59.8988   8
   1   6  -4 1.32969 6.58604   8
   1   6  -4 1.15066 2.56707   7
  -1  -6   4 3.27165 3.15784   1
  -1  -6   4 1.56922 7.77159   2
   1   6  -3 95.6584 14.4707   8
  -1  -6   3 90.5826 10.7753   1
   1   6  -3 90.9857 10.1412   7
  -1  -6   3 79.5295 15.2276   2
   1   6  -2 32.8828 4.92285   7
  -1  -6   2 38.0618 4.70425   7
   1   6  -2 37.9494 9.29485   8
  -1  -6   2 29.3680 10.1799   2
  -1  -6   2 36.0360 5.52711   1
   1   6  -1 143.218 15.1037   7
  -1  -6   1 187.032 21.6651   2
   1   6  -1 141.198 19.2649   8
  -1  -6   1 143.968 14.8286   7
  -1  -6   1 146.225 15.7444   1
   1   6   0 34.7080 10.5325   8
  -1  -6   0 44.1077 10.1618   2
  -1  -6   0 46.3646 6.05997   1
  -1  -6   0 39.6067 4.99762   7
   1   6   0 42.7042 5.38404   7
   1   6   1 114.296 12.4158   7
   1   6   1 114.720 17.2094   8
  -1  -6  -1 122.223 12.1961   7
  -1  -6  -1 115.536 12.9220   1
  -1  -6  -1 157.916 18.9879   2
  -1  -6  -2 34.4461 9.80890   2
   1   6   2 35.4999 10.7061   8
  -1  -6  -2 22.6054 4.30997   1
   1   6   2 29.1423 4.07388   7
  -1  -6  -2 36.1374 3.90871   7
  -1  -6  -3 349.546 35.7889   1
  -1  -6  -3 392.260 42.1822   2
   1   6   3 361.079 35.3997   7
  -1  -6  -3 370.380 35.1788   7
   1   6   3 375.369 40.9796   8
  -1  -6  -4 27.8202 11.0232   2
   1   6   4 34.8858 10.9225   8
  -1  -6  -4 34.5129 4.76545   1
   1   6   4 37.1461 4.55113   7
  -1  -6  -4 36.8183 4.29725   7
  -1  -6  -5 62.5464 15.0504   2
  -1  -6  -5 78.9877 8.07758   1
   1   6   5 69.8820 14.7587   8
   1   6   5 61.8931 7.79535   1
  -1  -6  -5 76.3775 7.67922   7
   1   6   5 69.0223 7.65213   7
   1   6   6 2.52288 1.48162   7
  -1  -6  -6-0.67839 1.63155   7
   1   6   6 3.44734 1.74892   1
   1   6   6 7.34355 9.75624   8
  -1  -6  -6 3.59292 1.66270   1
  -1  -6  -6-4.39218 11.0386   2
  -1  -6  -7 126.446 19.7185   2
   1   6   7 89.6612 18.4410   8
  -1  -6  -7 81.4982 9.50207   7
  -1  -6  -7 102.619 9.68884   1
   1   6   7 84.7956 9.45305   1
   1   6   8 27.0841 13.3490   8
   1   6   8 34.1718 4.27355   1
  -1  -6  -8 33.7086 4.34041   1
  -1  -6  -8 37.2786 4.77566   7
  -1  -6  -8 32.1169 4.58517   7
  -1  -6  -9 1.06741 1.59786   1
  -1  -6  -9 1.48478 1.83162   7
   1   6   9-5.89648 10.7147   8
  -1  -6  -9 1.55113 1.87541   7
  -1  -6 -10 7.57717 2.46833   7
  -1  -6 -10 3.91768 1.74255   1
  -1  -6 -10 5.49776 2.66163   7
   1   6  10 6.57160 8.39165   8
  -1  -6 -11 183.898 16.8271   1
   1   6  11 135.377 20.7597   8
  -1  -6 -11 149.173 17.3096   7
  -1  -6 -12 3.61791 16.5069   2
   1   6  12 3.67995 5.22084   8
  -1  -6 -12 5.30164 2.50875   7
   1   6  13 73.3153 9.91651   8
  -1  -6 -13 97.5566 24.6008   2
  -1  -6 -13 63.4129 8.04752   7
  -1  -6 -14 589.924 59.6305   2
   1   6  14 507.606 42.0972   8
   1   6  15 46.5712 7.33614   8
  -1  -6 -15 43.7849 6.28070   7
  -1  -6 -15 70.4501 22.2811   2
   1   6  16 7.99611 3.74627   8
  -1  -6 -16 4.28460 2.82983   7
  -1  -6 -16-3.93251 17.6192   2
   1   6  17 1.91156 3.52361   8
  -1  -6 -17 2.59938 2.87779   7
  -1  -6 -17 3.90961 15.0712   2
   1   6  18 27.5177 5.55900   8
  -1  -6 -18 15.7251 4.24146   7
  -1  -6 -18 15.2911 18.4389   2
   1   6  19 11.2760 4.61187   8
  -1  -6 -19 30.5001 19.7592   2
  -1  -6 -19 15.2866 4.22995   7
   1   6  20-2.21727 4.46067   8
  -1  -6 -20-3.87687 16.7076   2
  -1  -6 -20-0.61728 2.91643   7
  -1  -6 -21-3.83316 16.1856   2
  -1  -6 -21-1.29709 3.71019   7
  -1  -6 -22 19.3649 17.0211   2
  -1  -6 -22-1.37308 3.01813   7
  -1  -6 -23 3.89820 17.1357   2
  -1  -6 -24-11.5375 17.5735   2
  -1  -6 -25 26.9019 18.3199   2
  -1  -6 -26-3.79805 17.3254   2
  -1  -6 -27 3.78883 14.9689   2
   1   7 -26 11.3319 7.09466   7
  -1  -7  25 229.202 27.1935   1
   1   7 -25 173.902 23.7946   7
  -1  -7  24-1.75412 8.68496   1
   1   7 -24 1.31999 5.68842   7
  -1  -7  23 32.0561 9.68779   1
   1   7 -23 11.4529 6.79956   7
  -1  -7  22 8.10577 8.40224   1
   1   7 -22 4.89472 5.80383   7
  -1  -7  21 4.66958 6.84743   1
   1   7 -21 2.34984 5.55492   7
  -1  -7  20 52.2559 10.4880   1
   1   7 -20 34.9016 8.81801   7
  -1  -7  19 8.58222 7.10804   1
   1   7 -19 5.39033 4.95414   7
  -1  -7  18 158.508 20.2241   1
   1   7 -18 140.876 18.3092   7
   1   7 -17 7.84796 5.19628   7
   1   7 -16 113.764 14.8220   7
   1   7 -15 1.77123 4.51885   7
  -1  -7  14 2.23942 5.45933   1
   1   7 -14-0.83999 4.34402   7
  -1  -7  13 50.9161 9.14906   1
   1   7 -13 45.3023 7.84050   7
  -1  -7  12-2.00606 5.04232   1
   1   7 -12-0.75114 3.99267   7
  -1  -7  11 36.9732 7.75823   1
   1   7 -11 45.3932 7.24254   7
  -1  -7  10 33.0777 7.31352   1
   1   7 -10 42.6578 6.83943   7
  -1  -7   9 68.2854 11.0250   1
   1   7  -9 93.9119 10.7423   7
  -1  -7   8 6.36092 4.63423   1
  -1  -7   8 7.85672 10.4522   2
   1   7  -8 5.88676 3.63508   7
  -1  -7   7 0.75152 4.14794   1
  -1  -7   7 2.14358 11.3891   2
   1   7  -7 0.55322 2.82156   7
  -1  -7   6 348.587 35.9668   1
   1   7  -6 325.721 35.1121   7
  -1  -7   5 4.68675 3.74835   1
  -1  -7   5 10.7658 12.6023   2
   1   7  -5 8.12492 3.25239   7
   1   7  -4 111.325 17.2145   8
  -1  -7   4 121.401 14.0236   1
  -1  -7   4 135.576 21.3869   2
   1   7  -4 118.273 13.2448   7
  -1  -7   3 324.858 35.3548   2
  -1  -7   3 254.628 27.7861   1
   1   7  -3 268.184 27.1412   7
   1   7  -3 270.647 31.4010   8
  -1  -7   2 1.13497 3.01749   1
   1   7  -2 1.93629 2.36322   7
   1   7  -2-1.43460 7.31604   8
  -1  -7   2-1.96949 9.60316   2
   1   7  -1 80.8453 9.94041   7
   1   7  -1 93.5467 14.9319   8
  -1  -7   1 107.603 17.7650   2
  -1  -7   1 97.3582 10.8592   1
   1   7   0 21.5686 8.95667   8
  -1  -7   0 21.7687 4.51481   1
  -1  -7   0 28.0586 10.1700   2
   1   7   0 24.6324 4.00254   7
  -1  -7  -1 306.343 32.7704   2
   1   7   1 232.569 23.8887   7
   1   7   1 238.824 28.7758   8
  -1  -7  -1 237.836 24.5947   1
  -1  -7  -2 41.3007 5.75316   1
   1   7   2 37.8642 5.23497   7
   1   7   2 48.8918 11.3370   8
  -1  -7  -2 44.9169 12.6696   2
   1   7   3 109.796 11.6879   7
  -1  -7  -3 111.674 12.2670   1
  -1  -7  -3 103.998 19.1658   2
   1   7   3 114.434 17.4007   8
   1   7   4 4.71640 8.67760   8
  -1  -7  -4 2.39389 10.1090   2
  -1  -7  -4 0.39938 2.07094   1
   1   7   4 2.57511 1.90240   7
   1   7   5 7.41674 2.22408   7
  -1  -7  -5 11.3243 2.77902   1
  -1  -7  -5 14.8783 11.7375   2
   1   7   5 11.2788 8.37642   8
   1   7   6 35.1094 4.81385   7
  -1  -7  -6 48.4949 5.55526   1
   1   7   6 31.8599 11.4504   8
  -1  -7  -6 56.2833 16.6015   2
  -1  -7  -7 16.0284 3.11009   1
   1   7   7 17.6597 2.86759   7
   1   7   7 31.2152 11.5306   8
  -1  -7  -7 28.9202 14.8382   2
   1   7   8 12.2121 11.5766   8
  -1  -7  -8 9.32833 15.2160   2
  -1  -7  -8 13.9634 2.88858   1
  -1  -7  -9 76.6907 21.3887   2
  -1  -7  -9 80.0681 8.64240   1
   1   7   9 69.8160 16.5997   8
  -1  -7  -9 74.2138 8.69022   7
  -1  -7 -10 7.29095 2.48166   7
   1   7  10 18.5683 12.3532   8
  -1  -7 -11 21.6069 3.84374   7
   1   7  11 12.0467 12.9543   8
  -1  -7 -12 21.7547 3.92784   7
   1   7  12 13.7743 13.1295   8
  -1  -7 -13 51.1992 20.6747   2
   1   7  13 22.9594 12.5340   8
  -1  -7 -14 198.695 32.9252   2
   1   7  14 80.1669 15.9583   8
  -1  -7 -15-17.8364 21.7566   2
   1   7  15 16.9968 8.58571   8
  -1  -7 -16 144.650 31.8010   2
   1   7  16 100.823 14.9834   8
  -1  -7 -17 40.5167 20.8859   2
  -1  -7 -18 31.0786 22.8285   2
  -1  -7 -19-8.88392 19.9111   2
  -1  -7 -20 104.869 27.9124   2
  -1  -7 -21-4.38099 19.2580   2
  -1  -7 -22 30.9362 20.3669   2
  -1  -7 -23 17.6933 19.1353   2
  -1  -7 -24 13.4189 18.1269   2
  -1  -7 -25 26.4180 20.5882   2
  -1  -7 -26-4.39269 19.3094   2
  -1  -7 -27-13.0003 20.8316   2
  -1  -7 -28 43.1905 22.3982   2
   1   8 -25 14.3056 7.62093   7
   1   8 -24 22.1102 7.63384   7
   1   8 -23 77.3397 13.6911   7
  -1  -8  23 90.5063 16.3073   1
   1   8 -22-6.42268 5.97083   7
  -1  -8  22 1.77611 7.96090   1
   1   8 -21-4.94610 6.74484   7
  -1  -8  21 1.70598 7.35594   1
   1   8 -20 38.0173 8.82546   7
  -1  -8  20 55.6164 12.0120   1
   1   8 -19-4.55860 5.90924   7
   1   8 -18 10.9194 5.89269   7
   1   8 -17 14.6299 5.57824   7
   1   8 -16 61.8756 10.4787   7
  -1  -8  16 70.6860 12.4383   1
   1   8 -15 0.95198 5.13978   7
  -1  -8  15 10.3483 6.97405   1
   1   8 -14 110.619 15.0605   7
  -1  -8  14 137.647 17.2957   1
   1   8 -13 2.59035 4.59359   7
  -1  -8  13 2.33212 5.60065   1
   1   8 -12-0.82224 4.01608   7
  -1  -8  12 9.95598 5.95905   1
   1   8 -11 4.69140 4.05579   7
  -1  -8  11 1.04800 5.27634   1
   1   8 -10-0.74075 3.93575   7
  -1  -8  10 0.99286 4.84083   1
  -1  -8   9 19.7539 5.86961   1
   1   8  -9 13.2883 4.82896   7
  -1  -8   8 32.1479 6.83128   1
   1   8  -8 26.9693 5.90676   7
  -1  -8   7 10.3107 14.0788   2
  -1  -8   7 6.78120 4.41157   1
   1   8  -7 11.6871 4.29978   7
   1   8  -6 122.141 15.0050   7
  -1  -8   6 147.233 16.3778   1
  -1  -8   6 157.782 25.4723   2
  -1  -8   5-8.30883 15.4727   2
  -1  -8   5 8.39415 4.11711   1
   1   8  -5 1.08099 2.99622   7
   1   8  -4 147.507 17.2758   7
  -1  -8   4 168.222 18.3358   1
   1   8  -3 157.568 22.2554   8
  -1  -8   3 162.579 18.5370   1
   1   8  -3 155.556 17.6299   7
   1   8  -2 24.8590 4.49830   7
  -1  -8   2 26.1314 5.50799   1
  -1  -8   2 13.2477 11.6338   2
   1   8  -2 17.0747 8.22319   8
  -1  -8   1 57.5442 8.27195   1
  -1  -8   1 86.6612 17.6979   2
   1   8  -1 53.7249 12.0509   8
  -1  -8   0 54.0948 7.98528   1
  -1  -8   0 54.0091 16.3853   2
   1   8   0 76.5255 12.9456   8
  -1  -8  -1 31.2571 5.22646   1
  -1  -8  -1 18.6953 12.2197   2
   1   8   1 15.4086 8.35160   8
  -1  -8  -2 41.0777 6.06277   1
  -1  -8  -2 38.5109 14.0540   2
   1   8   2 21.6438 9.58739   8
  -1  -8  -3 11.1634 3.63505   1
   1   8   3 6.24289 8.24155   8
  -1  -8  -3 11.3389 12.2558   2
   1   8   4 203.456 27.5726   8
  -1  -8  -4 286.020 36.3184   2
  -1  -8  -4 224.926 23.3397   1
   1   8   5-4.91734 7.99606   8
  -1  -8  -5 3.14095 12.9858   2
  -1  -8  -5 3.70415 2.56911   1
   1   8   6 10.1039 8.66631   8
  -1  -8  -6 21.1905 4.09890   1
  -1  -8  -6 26.9008 17.0019   2
   1   8   7 193.766 30.7275   8
  -1  -8  -7 269.667 26.3826   1
   1   8   8 7.19029 9.92860   8
  -1  -8  -8-3.82398 16.4842   2
  -1  -8  -9-8.10899 18.8230   2
   1   8   9 11.4846 10.3106   8
  -1  -8 -10-4.28868 19.5737   2
   1   8  10-8.48266 11.5842   8
  -1  -8 -11 157.863 31.7543   2
   1   8  11 46.1599 16.5719   8
   1   8  12 220.459 32.1183   8
  -1  -8 -14-4.95641 20.9331   2
  -1  -8 -15 20.1686 22.6617   2
  -1  -8 -16 5.09669 21.5255   2
  -1  -8 -17-5.06372 20.4763   2
  -1  -8 -18 139.416 34.1799   2
  -1  -8 -19 9.93842 21.8588   2
  -1  -8 -20 14.7857 22.9182   2
  -1  -8 -21 34.9074 23.3798   2
  -1  -8 -22-14.9263 22.7352   2
  -1  -8 -23 25.0188 20.3661   2
  -1  -8 -24 15.0727 19.8952   2
  -1  -8 -25 30.1488 20.0500   2
  -1  -8 -26 4.93008 19.4778   2
  -1  -8 -27-29.3981 25.8374   2
  -1  -8 -28 58.5150 24.7690   2
  -1  -8 -29 4.87506 21.0139   2
  -1  -9  19-3.41543 7.65484   1
  -1  -9  18 81.6444 15.0322   1
  -1  -9  17 10.9162 7.18672   1
  -1  -9  16-10.4082 8.55748   1
  -1  -9  15 75.0306 13.1869   1
  -1  -9  14 2.69468 6.77602   1
  -1  -9  13 3.84330 6.54243   1
  -1  -9  12 97.3564 14.3822   1
  -1  -9  11-1.15638 5.63910   1
  -1  -9  10 70.3054 11.4907   1
  -1  -9   9 117.928 15.8283   1
  -1  -9   8 12.9103 5.99366   1
  -1  -9   7 2.83532 4.89480   1
  -1  -9   6 169.879 20.0054   1
  -1  -9   5 230.340 31.2138   2
  -1  -9   5 123.057 16.1108   1
  -1  -9   4 179.823 28.3135   2
  -1  -9   4 115.299 14.8771   1
  -1  -9   3 13.7785 18.5738   2
  -1  -9   3 11.6023 4.75004   1
   1   9  -2 33.6779 9.85527   8
  -1  -9   2 17.7313 5.54997   1
  -1  -9   2 38.2028 17.8339   2
   1   9  -1 983.199 101.005   8
  -1  -9   1 945.329 97.0198   1
   1   9   0 16.1904 8.91468   8
  -1  -9   0 10.8088 4.64589   1
  -1  -9  -1 212.895 23.6358   1
   1   9   1 209.720 27.4347   8
  -1  -9  -2 132.187 25.6418   2
  -1  -9  -2 111.861 13.4547   1
   1   9   2 115.979 18.1405   8
  -1  -9  -3-3.67387 14.1609   2
  -1  -9  -3-0.59717 3.13091   1
   1   9   3 8.08281 7.75761   8
  -1  -9  -4 88.7717 11.5132   1
   1   9   4 105.676 16.8584   8
   1   9   5 13.2055 9.17245   8
  -1  -9  -5 19.4461 4.51309   1
  -1  -9  -5 32.0859 19.9375   2
  -1  -9  -6 28.9320 21.3932   2
   1   9   6 6.69983 8.34259   8
  -1  -9  -7 30.5706 21.5675   2
   1   9   7 37.8737 11.7160   8
  -1  -9  -8 78.2871 27.7735   2
   1   9   8 70.7299 15.2481   8
  -1  -9  -9 57.9520 25.8784   2
   1   9   9 30.9375 12.2109   8
  -1  -9 -10 125.767 32.5976   2
  -1  -9 -11 62.4485 27.5519   2
  -1  -9 -12 5.33890 23.9156   2
  -1  -9 -16 28.1522 25.3560   2
  -1  -9 -17 33.3005 25.0547   2
  -1  -9 -18 67.0235 27.5416   2
  -1  -9 -19-22.2395 25.4439   2
  -1  -9 -20 21.9986 23.7916   2
  -1  -9 -21 99.9296 30.2241   2
  -1  -9 -22 44.2121 26.4221   2
  -1  -9 -23-11.0877 24.8504   2
  -1  -9 -24-11.1813 25.0601   2
  -1  -9 -25-16.8792 22.8013   2
  -1  -9 -26-5.51354 20.7203   2
  -1 -10  18 3.51446 7.42711   1
  -1 -10  17 3.35831 7.24318   1
  -1 -10  16 22.4598 8.99911   1
  -1 -10  15 7.64972 7.72288   1
  -1 -10  14 1.45832 6.53256   1
  -1 -10  13 33.3510 9.19440   1
  -1 -10  12 5.28820 5.94188   1
  -1 -10  11 5.03738 6.15848   1
  -1 -10  10 1.19859 5.46759   1
  -1 -10   9 77.5179 12.0593   1
  -1 -10   8 56.4807 9.93118   1
  -1 -10   7 28.9232 7.25666   1
  -1 -10   6 50.3163 9.28775   1
  -1 -10   5 8.49040 5.01054   1
  -1 -10   4 521.906 53.1098   1
  -1 -10   3 55.8639 20.9653   2
  -1 -10   3 12.1045 5.34466   1
  -1 -10   2 98.4081 25.5906   2
  -1 -10   2 54.7763 9.25588   1
  -1 -10   1 76.1025 23.9075   2
  -1 -10   1 87.9573 11.5941   1
   1  10   0 75.9503 15.2646   8
  -1 -10   0 81.5831 11.3006   1
   1  10   1 279.875 38.1715   8
  -1 -10  -1 344.464 35.0933   1
   1  10   2 239.048 30.5088   8
  -1 -10  -2 240.473 26.5754   1
   1  10   3 141.388 22.1679   8
  -1 -10  -3 155.454 17.9659   1
  -1 -10  -4 461.692 51.7458   2
   1  10   4 220.674 31.0232   8
  -1 -10  -5 63.6335 26.0343   2
   1  10   5 6.70763 8.98980   8
  -1 -10  -6 5.03763 22.1444   2
  -1 -10  -7-10.4687 24.3149   2
  -1 -10  -8 21.5887 24.2573   2
  -1 -10  -9-27.8191 26.8288   2
  -1 -10 -10 45.5558 25.8639   2
  -1 -10 -11-17.5503 26.2522   2
  -1 -10 -12-17.9080 26.2885   2
  -1 -10 -13-24.1924 28.1648   2
  -1 -10 -14-12.1675 26.7615   2
  -1 -10 -17 24.2967 28.2862   2
  -1 -10 -18 6.14901 24.2935   2
  -1 -10 -19 73.0412 30.0144   2
  -1 -10 -20 42.4736 29.8547   2
  -1 -10 -21-30.1879 26.6870   2
  -1 -10 -22 18.1359 26.6231   2
  -1 -10 -23 42.3704 27.4024   2
  -1 -11  15 16.2634 8.31677   1
  -1 -11  14 7.76542 6.32130   1
  -1 -11  13 17.7606 7.93905   1
  -1 -11  12 21.1993 8.32482   1
  -1 -11  11 32.3798 9.22462   1
  -1 -11  10 6.44349 6.21413   1
  -1 -11   9 72.6908 12.3786   1
  -1 -11   8 1.17729 5.37040   1
  -1 -11   7 98.0704 14.1490   1
  -1 -11   6 1.08101 4.93122   1
  -1 -11   5 14.5083 6.01546   1
  -1 -11   4 7.98869 5.28946   1
  -1 -11   3 64.5615 10.2063   1
  -1 -11   2-1.85799 4.31542   1
  -1 -11   1-13.8941 21.1246   2
  -1 -11   1 4.49161 4.45872   1
  -1 -11   0 65.3522 9.76714   1
  -1 -11   0 24.1389 23.8766   2
  -1 -11  -1 9.99984 19.2953   2
  -1 -11  -2 5.12806 15.9433   2
  -1 -11  -3 10.5245 19.7947   2
  -1 -11  -4 113.458 30.9959   2
  -1 -11  -5 33.3156 24.6050   2
  -1 -11  -6 91.3126 32.6577   2
  -1 -11  -7 5.87161 23.1976   2
  -1 -11  -8 35.8837 27.9651   2
  -1 -11  -9 6.15682 26.0029   2
  -1 -11 -10 18.6838 29.4536   2
  -1 -11 -11 216.184 47.4317   2
  -1 -11 -12 83.8142 32.4176   2
  -1 -11 -13-65.0553 34.6565   2
  -1 -11 -14 6.55878 25.9124   2
  -1 -11 -15 6.58161 25.3763   2
  -1 -11 -16-6.60149 30.6466   2
  -1 -11 -19 19.6868 31.0347   2
  -1 -12  12 33.1160 9.77989   1
  -1 -12  11 4.32434 7.25571   1
  -1 -12  10 44.1927 10.3304   1
  -1 -12   9 5.29383 5.72529   1
  -1 -12   8 1.27312 4.90869   1
  -1 -12   7-2.45127 6.93091   1
  -1 -12   6 1.18109 5.93678   1
  -1 -12   5 15.9521 6.75834   1
  -1 -12   4 23.0978 6.98603   1
  -1 -12   3 19.1834 6.42324   1
  -1 -12  -1 52.0709 23.4077   2
  -1 -12  -2-10.9039 19.9627   2
  -1 -12  -3 5.59239 19.2873   2
  -1 -12  -4 17.2292 19.8664   2
  -1 -12  -5 35.3894 23.5351   2
  -1 -12  -6 54.5684 27.6397   2
  -1 -12  -7 49.8736 26.1968   2
  -1 -12  -8-32.0711 28.3517   2
  -1 -12  -9 109.927 36.3234   2
  -1 -12 -10 46.5858 29.0161   2
  -1 -12 -11 33.5381 29.0795   2
  -1 -12 -12 13.4551 24.6333   2
  -1 -12 -13 47.2189 29.9796   2
  -1 -12 -14-13.6428 30.5769   2
  -1 -12 -15-6.88359 30.2589   2
  -1 -13   8-2.74239 6.69040   1
  -1 -13   7 13.2374 6.76932   1
  -1 -13  -3 22.4828 18.8824   2
  -1 -13  -4-11.5431 22.2731   2
  -1 -13  -5 65.2386 25.7905   2
  -1 -13  -6 30.4715 27.4450   2
  -1 -13  -7 43.8689 26.7847   2
  -1 -13  -8 12.8921 26.0873   2
  -1 -13  -9 19.5558 26.4170   2
  -1 -13 -10 13.4183 27.1522   2
   2 -13  -2 21.5047 15.8580   2
   2 -12 -10-4.86769 17.8055   2
   2 -12  -9-13.6423 19.6393   2
   2 -12  -8 4.25467 17.5911   2
   2 -12  -7-4.10756 16.6098   2
   2 -12  -6 19.2227 14.5574   2
   2 -12  -5 32.4381 18.1068   2
   2 -12  -4 177.546 31.6548   2
   2 -12  -3-9.87500 12.7220   2
   2 -12  -2 19.0903 12.6957   2
   2 -12  -1-3.07591 10.6084   2
   2 -12   0 5.95634 10.5984   2
   2 -12   1 6.81020 5.98534   1
   2 -12   2 2.30816 5.36101   1
   2 -12   3 11.7586 6.26411   1
   2 -12   4 3.60644 6.05117   1
   2 -12   5 13.5374 6.40442   1
   2 -12   6 13.8818 6.74508   1
   2 -12   7 3.88098 5.69720   1
   2 -12   8 1.32948 5.95540   1
   2 -11 -14 52.1697 25.9096   2
   2 -11 -13-4.72232 17.2738   2
   2 -11 -12 57.5545 21.5969   2
   2 -11 -11-4.15109 17.1629   2
   2 -11 -10-15.2454 15.4751   2
   2 -11  -9 21.6430 15.9842   2
   2 -11  -2 13.8884 5.36407   1
   2 -11  -1 56.7772 10.0889   1
   2 -11   0 35.4209 7.64114   1
   2 -11   1 21.6157 6.47729   1
   2 -11   2 12.6130 6.05902   1
   2 -11   3 4.30174 5.34018   1
   2 -11   4 1.10135 4.65148   1
   2 -11   5-7.89338 6.98068   1
   2 -11   6 1.15774 4.99040   1
   2 -11   7 3.57284 5.81638   1
   2 -11   8 11.0456 6.51844   1
   2 -11   9-1.26647 5.56716   1
   2 -11  10-6.53667 6.97335   1
   2 -11  11 24.3218 8.30864   1
   2 -11  12 1.40026 5.91391   1
   2 -10 -20 7.66789 31.0068   2
   2 -10 -19 13.1646 27.2363   2
   2 -10 -18-17.5681 24.7821   2
   2 -10 -17 15.9331 22.0047   2
   2 -10 -16 9.63832 18.1279   2
   2 -10 -13 139.865 29.5883   2
   2 -10  -5 58.9799 9.21531   1
   2 -10  -4 32.2021 6.86629   1
   2 -10  -3 10.4678 5.35514   1
   2 -10  -2 1.76067 4.36187   1
   2 -10  -1 8.04896 4.99393   1
   2 -10   0 14.5755 5.72034   1
   2 -10   1 40.9615 8.23349   1
   2 -10   2 3.81715 4.44392   1
   2 -10   3 66.4109 10.7350   1
   2 -10   4 1.00088 5.03093   1
   2 -10   5 11.3111 5.56700   1
   2 -10   6-2.11670 5.00022   1
   2 -10   7 1.09059 4.70097   1
   2 -10   8 65.2301 11.1991   1
   2 -10   9 5.82148 5.61426   1
   2 -10  10 9.64617 5.67031   1
   2 -10  11 3.74905 5.81111   1
   2 -10  12-3.88979 6.71521   1
   2 -10  13 2.68986 5.44297   1
   2 -10  14 25.1380 7.50721   1
   2 -10  15 52.2463 11.0185   1
   2 -10  16 25.6097 9.13297   1
   2  -9 -23 42.2392 35.1465   2
   2  -9 -22 31.1986 30.9469   2
   2  -9 -21 61.3167 31.6080   2
   2  -9 -20 151.842 38.6533   2
   2  -9 -19 41.7481 22.3853   2
   2  -9 -18 80.3693 27.7789   2
   2  -9 -17 12.8496 18.4981   2
   2  -9 -16 7.79143 17.1367   2
   2  -9 -15 14.3342 16.1060   2
   2  -9  -8 0.70876 3.71639   1
   2  -9  -7 4.32865 4.09792   1
   2  -9  -6 7.27040 4.21304   1
   2  -9  -5 4.41563 3.93229   1
   2  -9  -4-2.26690 4.17568   1
   2  -9  -3 11.6446 5.08278   1
   2  -9  -2-3.13642 4.17652   1
   2  -9  -1 42.4003 7.70296   1
   2  -9   0 212.775 23.5576   1
   2  -9   1 108.330 13.7183   1
  -2   9  -1 102.921 13.6247   7
   2  -9   2 27.5110 6.39706   1
  -2   9  -2 17.9730 6.58167   7
  -2   9  -3 27.2768 6.52275   7
   2  -9   3 21.1695 6.17307   1
  -2   9  -4 17.2798 6.08231   7
   2  -9   4 12.6920 5.75402   1
  -2   9  -5 20.7040 6.44009   7
   2  -9   5 31.7315 6.88168   1
  -2   9  -6 19.4219 6.45730   7
   2  -9   6 22.1051 6.28880   1
  -2   9  -7 14.0311 6.07166   7
   2  -9   7 7.95113 5.77381   1
  -2   9  -8 20.6710 6.47067   7
   2  -9   8 2.05858 4.58999   1
   2  -9   9 2.13171 4.59548   1
  -2   9  -9-5.35969 5.69705   7
   2  -9  10-1.10510 4.76609   1
  -2   9 -10 7.74466 5.95805   7
   2  -9  11-8.03348 6.26648   1
  -2   9 -11 1.14306 5.31795   7
   2  -9  12 131.382 17.1383   1
  -2   9 -12 119.417 16.8111   7
   2  -9  13 27.2744 7.89798   1
  -2   9 -13 16.8080 7.23411   7
   2  -9  14 108.134 16.1737   1
  -2   9 -14 112.736 16.3528   7
   2  -9  15 2.67348 6.10148   1
  -2   9 -15 2.56675 5.64558   7
   2  -9  16 2.77436 6.45415   1
  -2   9 -16 6.62303 6.26929   7
  -2   9 -17 2.73299 6.23750   7
  -2   9 -18 62.0652 11.9922   7
   2  -9  19 17.0284 8.86591   1
  -2   9 -19 34.9425 9.76589   7
  -2   9 -20 22.5258 8.93994   7
  -2   9 -21 4.64432 8.23687   7
   2  -8 -26 50.7627 36.7744   2
   2  -8 -25 8.43400 35.6204   2
   2  -8 -24 8.00527 31.6272   2
   2  -8 -23 133.748 41.4541   2
   2  -8 -22 32.7252 31.5603   2
   2  -8 -21-5.59641 22.6303   2
   2  -8 -20 62.3452 25.4915   2
   2  -8 -19 13.0078 19.8130   2
   2  -8 -18 22.7807 19.4792   2
   2  -8 -17 100.230 25.1216   2
  -2   8  11 8.02403 4.50993   7
  -2   8  10 14.3168 4.87129   7
   2  -8 -10 12.9931 4.45548   1
  -2   8   9 23.3160 5.37494   7
   2  -8  -9 17.9908 4.74785   1
  -2   8   8 1.39989 3.57517   7
   2  -8  -8 3.12616 3.77797   1
  -2   8   7 4.15825 3.75246   7
   2  -8  -7 4.44913 3.65649   1
   2  -8  -6 141.554 15.9495   1
  -2   8   6 134.143 16.0084   7
   2  -8  -5 0.64881 3.49221   1
  -2   8   5-0.69027 3.71540   7
  -2   8   4 95.9561 12.3901   7
   2  -8  -4 101.769 12.3301   1
  -2   8   3 1.42026 3.67362   7
   2  -8  -3 0.68376 3.72853   1
   2  -8  -2 204.537 22.1833   1
  -2   8   2 200.660 22.2243   7
   2  -8  -1 170.035 19.8446   1
  -2   8   1 189.267 20.2673   7
  -2   8   0 1.52405 3.83118   7
   2  -8   0 0.73083 3.98526   1
   2  -8   1 149.420 17.8196   1
  -2   8  -1 161.299 18.1272   7
  -2   8  -2 37.3894 6.99940   7
   2  -8   2 30.0579 6.52878   1
  -2   8  -3 31.8203 6.89663   7
   2  -8   3 33.3064 6.81108   1
  -2   8  -4 26.0431 6.22067   7
   2  -8   4 22.0410 6.06838   1
  -2   8  -5 16.4003 5.60567   7
   2  -8   5 14.3088 5.27984   1
  -2   8  -6 36.3704 7.86196   7
   2  -8   6 58.3822 8.88288   1
  -2   8  -7 14.6804 5.50893   7
   2  -8   7 7.21641 4.70234   1
  -2   8  -8 11.3564 5.38002   7
   2  -8   8 1.86833 4.86555   1
  -2   8  -9 18.5274 6.26688   7
   2  -8   9 28.1622 6.88446   1
  -2   8 -10 22.9272 6.73387   7
   2  -8  10 30.2576 7.07467   1
  -2   8 -11 1.02787 4.94029   7
   2  -8  11 5.23511 5.26921   1
  -2   8 -12 56.5439 9.59407   7
   2  -8  12 42.3733 9.59278   1
  -2   8 -13 38.6259 8.93908   7
   2  -8  13 45.1140 8.94017   1
  -2   8 -14 1.14274 5.02326   7
  -2   8 -15 53.3209 10.0255   7
  -2   8 -16 28.2650 7.73758   7
  -2   8 -17 113.352 16.3142   7
   2  -8  17 112.813 16.4788   1
  -2   8 -18 40.9218 9.32262   7
   2  -8  18 32.6412 8.58290   1
  -2   8 -19 15.0468 7.42212   7
   2  -8  19 16.9222 7.83319   1
  -2   8 -20 52.4307 11.2334   7
   2  -8  20 49.6392 11.0914   1
  -2   8 -21 43.9935 9.63612   7
   2  -8  21 45.3009 10.3705   1
  -2   8 -22-3.02932 6.65967   7
   2  -8  22 9.36417 7.24664   1
  -2   8 -23 21.8837 9.36874   7
   2  -7 -27 15.0524 33.7362   2
   2  -7 -26 91.9161 37.1892   2
   2  -7 -25-7.61575 31.4877   2
   2  -7 -24 28.1861 30.4833   2
   2  -7 -23-6.26671 30.0785   2
   2  -7 -22 48.5123 26.2703   2
   2  -7 -21-13.6786 20.4199   2
   2  -7 -21 1.23103 5.71373   7
   2  -7 -20-15.9065 18.1362   2
   2  -7 -20 2.41118 5.69136   7
   2  -7 -19 39.4451 18.2965   2
   2  -7 -19 3.55159 5.98620   7
   2  -7 -18 53.5738 18.0347   2
   2  -7 -18 25.7197 8.05447   7
   2  -7 -17-2.31697 5.91119   7
   2  -7 -16 4.61869 5.46840   7
  -2   7  14 202.101 22.5896   7
  -2   7  13 279.159 29.6701   7
   2  -7 -12 29.8228 5.25002   1
  -2   7  12 14.7459 4.94129   7
   2  -7 -11 0.54859 2.95338   1
  -2   7  11 0.72019 3.67273   7
   2  -7 -10 0.54973 3.38482   1
  -2   7  10 1.40843 4.07255   7
   2  -7  -9 4.95841 3.40131   1
  -2   7   9 6.94516 4.18261   7
   2  -7  -8 9.89302 3.85724   1
  -2   7   8 8.19925 4.12810   7
   2  -7  -7 1.11279 3.07274   1
  -2   7   7 1.35075 3.81878   7
   2  -7  -6 8.45170 3.72783   1
  -2   7   6 12.8369 4.57516   7
   2  -7  -5-0.56875 3.03003   1
  -2   7   5 7.96704 3.84508   7
   2  -7  -4 103.610 12.0988   1
  -2   7   4 97.3991 12.3927   7
   2  -7  -3 13.8209 4.28879   1
  -2   7   3 7.40790 3.97268   7
  -2   7   2 507.501 51.6246   7
   2  -7  -2 523.467 51.3906   1
  -2   7   1 342.076 35.7701   7
   2  -7  -1 352.917 35.5942   1
  -2   7   0-0.70803 3.56395   7
   2  -7   0 5.18659 3.71196   1
   2  -7   1 66.5893 10.1135   1
  -2   7  -1 99.2379 11.2492   7
   2  -7   2 37.7355 6.35708   1
  -2   7  -2 28.3452 6.15574   7
   2  -7   3-1.41445 3.71025   1
  -2   7  -3-1.48564 3.79009   7
   2  -7   4 3.65359 3.45069   1
  -2   7  -4-2.27745 3.75974   7
  -2   7  -5 177.568 19.6101   7
   2  -7   5 165.625 19.3551   1
  -2   7  -6 31.2895 6.88549   7
   2  -7   6 39.1527 6.92571   1
  -2   7  -7 86.8269 11.7804   7
   2  -7   7 84.6169 11.5752   1
  -2   7  -8 6.73671 4.35857   7
   2  -7   8-1.69002 3.92630   1
  -2   7  -9 23.4656 5.93238   7
   2  -7   9 9.64108 4.99143   1
  -2   7 -10 59.5420 8.86517   7
   2  -7  10 35.4663 7.97390   1
  -2   7 -11 10.2878 5.06426   7
   2  -7  11 10.3927 5.30491   1
  -2   7 -12 86.5435 12.5245   7
  -2   7 -13 18.2224 6.52359   7
  -2   7 -14 9.49614 5.60407   7
  -2   7 -15 10.9947 6.01922   7
   2  -7  15 2.20121 5.13876   1
  -2   7 -16 49.2807 9.68849   7
   2  -7  16 56.0011 10.1102   1
  -2   7 -17 9.54763 6.01258   7
   2  -7  17 1.18607 5.02567   1
  -2   7 -18-1.23958 5.55165   7
   2  -7  18 2.45922 6.44659   1
  -2   7 -19 23.1717 7.22055   7
   2  -7  19 6.36519 6.33939   1
   2  -7  20 1.31792 6.23053   1
  -2   7 -20 6.67356 6.91031   7
   2  -7  21-20.4448 8.15707   1
  -2   7 -21-5.53040 7.83058   7
   2  -7  22 4.22390 6.97602   1
  -2   7 -22-7.15198 7.40170   7
   2  -7  23 13.0821 7.41183   1
  -2   7 -23-5.91237 6.97780   7
   2  -7  24 74.9553 13.9420   1
  -2   7 -24 80.9502 14.3752   7
  -2   7 -25-6.30182 8.71498   7
   2  -6 -28-2.86628 6.88267   7
   2  -6 -27 17.7810 7.07651   7
   2  -6 -26-6.88518 26.5408   2
   2  -6 -26 3.94130 5.78295   7
   2  -6 -25 150.291 41.5565   2
   2  -6 -25 51.3679 10.7332   7
   2  -6 -24 6.30626 25.5009   2
   2  -6 -24 6.37020 5.84160   7
   2  -6 -23-16.7729 27.7154   2
   2  -6 -23 20.6923 7.92059   7
   2  -6 -22 23.9701 23.4295   2
   2  -6 -22 16.4378 7.48752   7
   2  -6 -21 222.711 35.5211   2
   2  -6 -21 178.060 22.6726   7
   2  -6 -20 16.9745 16.5614   2
   2  -6 -20 4.70725 5.39573   7
   2  -6 -19 68.1234 18.4687   2
   2  -6 -19 35.7679 9.08269   7
   2  -6 -18 23.8583 14.1805   2
   2  -6 -18 15.8556 7.16309   7
   2  -6 -17 127.405 16.9702   7
   2  -6 -16 3.32752 5.33198   7
   2  -6 -15 242.795 25.3665   1
   2  -6 -14 70.9203 9.55601   1
  -2   6  14 80.4059 10.7820   7
   2  -6 -13 1020.82 99.2389   1
  -2   6  13 1035.67 100.294   7
   2  -6 -12 184.903 20.2578   1
  -2   6  12 202.682 21.3466   7
   2  -6 -11 1.48378 2.95352   1
  -2   6  11-2.10967 3.92808   7
   2  -6 -10 33.2565 5.31255   1
  -2   6  10 25.2168 5.96419   7
  -2   6   9 134.272 16.4739   7
   2  -6  -9 153.080 15.9067   1
  -2   6   8 86.0960 11.6415   7
   2  -6  -8 99.5157 11.0770   1
  -2   6   7 5.17360 3.70447   7
   2  -6  -7 3.39898 2.75403   1
  -2   6   7 0.33602 2.55183   8
   2  -6  -6 180.927 20.0102   1
  -2   6   6 203.724 20.8859   7
   2  -6  -5 35.6528 5.85673   1
  -2   6   5 40.2775 6.55209   7
   2  -6  -4 45.0988 6.22963   1
  -2   6   4 34.9826 6.51253   7
   2  -6  -3 80.2059 9.08311   1
  -2   6   3 58.7049 9.00233   7
   2  -6  -3 61.3541 13.5586   8
   2  -6  -2 85.0048 10.2115   1
  -2   6   2 85.0289 10.6281   7
   2  -6  -2 67.9659 14.9818   8
  -2   6   1 81.2528 10.7511   7
   2  -6  -1 87.9802 10.5743   1
  -2   6   0 988.733 96.7930   7
   2  -6   0 1001.94 96.5192   1
  -2   6  -1 89.7490 11.8667   7
   2  -6   1 105.462 12.0075   1
   2  -6   2 345.089 36.8525   1
  -2   6  -2 386.086 37.2730   7
  -2   6  -3-1.32501 3.83135   7
   2  -6   3 3.74852 3.49069   1
  -2   6  -4 220.564 24.4393   7
   2  -6   4 238.633 24.5034   1
   2  -6   5 2.68811 3.33301   1
  -2   6  -5 1.38764 3.54314   7
  -2   6  -6 334.848 32.8263   7
   2  -6   6 294.025 32.4741   1
  -2   6  -7 19.5693 5.20475   7
   2  -6   7 14.5267 4.65918   1
  -2   6  -8 43.6324 7.10912   7
   2  -6   8 31.6402 6.62584   1
  -2   6  -9 25.7711 5.79131   7
   2  -6   9 19.5619 5.60172   1
  -2   6 -10 19.5479 5.52454   7
  -2   6 -11 24.6960 6.14613   7
  -2   6 -12 3.56955 4.75328   7
  -2   6 -13 204.722 22.5974   7
   2  -6  13 187.414 22.3237   1
  -2   6 -14 47.8350 8.88044   7
   2  -6  14 50.3094 8.93036   1
   2  -6  15-0.98526 4.51281   1
  -2   6 -15-6.11719 6.03866   7
   2  -6  16 32.7065 7.50432   1
  -2   6 -16 42.5418 8.66611   7
   2  -6  17-2.11901 5.00224   1
  -2   6 -17 1.10792 5.80894   7
   2  -6  18 16.5050 6.36951   1
  -2   6 -18 25.3451 7.21152   7
   2  -6  19 23.9254 7.56335   1
  -2   6 -19 28.6743 8.09209   7
   2  -6  20 14.1438 6.56905   1
  -2   6 -20 6.21061 5.83771   7
   2  -6  21 30.4791 8.15585   1
  -2   6 -21 33.4734 8.47923   7
   2  -6  22 73.0656 12.3755   1
  -2   6 -22 72.0100 12.5704   7
   2  -6  23 7.78685 6.38767   1
  -2   6 -23 11.0554 7.10049   7
   2  -6  24 6.69599 5.56142   1
  -2   6 -24 4.29110 6.66051   7
   2  -6  25 80.0718 13.1915   1
  -2   6 -25 60.5401 12.8544   7
   2  -6  26 76.7604 14.6822   1
  -2   6 -26 108.302 16.1669   7
   2  -6  27 10.2420 6.97470   1
   2  -5 -30-1.49161 7.82130   7
   2  -5 -29 2.94419 6.71953   7
   2  -5 -28 2.87631 6.56461   7
   2  -5 -27 31.3463 9.12652   7
   2  -5 -26 15.6463 7.08363   7
   2  -5 -25 30.1807 27.1133   2
   2  -5 -25 21.3856 8.09209   7
   2  -5 -24-22.9179 26.5940   2
   2  -5 -24-1.23316 5.31973   7
   2  -5 -23-5.12207 22.1253   2
   2  -5 -23 18.4187 6.94429   7
   2  -5 -22 12.7272 19.1162   2
   2  -5 -22 23.6982 7.58955   7
   2  -5 -21-3.44681 14.3022   2
   2  -5 -21 16.5773 6.49513   7
   2  -5 -20-2.98365 16.6673   2
   2  -5 -20-2.28319 5.74176   7
   2  -5 -19 7.55444 12.0841   2
   2  -5 -19-1.11290 5.67466   7
   2  -5 -18 87.7661 13.1062   7
   2  -5 -17 12.7659 5.99383   7
   2  -5 -16 70.8491 9.36048   1
   2  -5 -16 76.4345 11.7936   7
   2  -5 -15 4.16770 3.39430   1
   2  -5 -15-3.11700 5.52292   7
   2  -5 -14 381.126 38.1955   1
  -2   5  13 269.640 29.8695   7
   2  -5 -13 295.991 29.1027   1
  -2   5  12 104.771 12.3782   7
   2  -5 -12 91.3333 11.0948   1
  -2   5  11 258.429 23.7713   7
   2  -5 -11 234.585 22.5598   1
  -2   5  10 436.382 40.9258   7
  -2   5  10 343.466 40.1968   8
   2  -5 -10 430.395 39.9654   1
  -2   5   9 278.445 25.7933   7
  -2   5   9 205.147 24.2494   8
   2  -5  -9 261.315 24.7139   1
  -2   5   8 218.545 20.6125   7
   2  -5  -8 216.946 19.5994   1
  -2   5   8 155.755 18.6610   8
  -2   5   7 75.9797 9.52068   7
   2  -5  -7 73.5695 8.64974   1
  -2   5   7 67.7556 7.96202   8
  -2   5   6 0.60122 3.11240   7
   2  -5  -6 2.12882 2.62451   1
   2  -5  -5 28.7970 4.85502   1
  -2   5   5 26.8671 5.41572   7
   2  -5  -5 30.5480 3.72777   8
   2  -5  -4 246.243 25.2902   1
  -2   5   4 253.949 25.9849   7
   2  -5  -4 245.259 25.2269   8
   2  -5  -3 24.3178 4.56428   1
  -2   5   3 25.4252 5.08431   7
   2  -5  -3 15.8385 8.28952   8
   2  -5  -2 380.293 38.5028   1
  -2   5   2 398.646 39.0632   7
   2  -5  -2 381.374 41.4863   8
   2  -5  -1 38.5894 8.94108   8
   2  -5  -1 49.7719 6.77538   1
  -2   5   1 50.2738 7.38914   7
   2  -5   0 23.5520 7.56582   8
   2  -5   0 47.2244 6.43096   1
  -2   5   0 44.5558 6.66239   7
   2  -5   1 105.252 11.6219   1
  -2   5  -1 90.8046 11.7532   7
   2  -5   2 628.503 60.8106   1
  -2   5  -2 609.808 60.9220   7
   2  -5   3 192.854 21.1751   1
  -2   5  -3 209.514 21.5680   7
  -2   5  -4 145.577 16.4022   7
   2  -5   4 148.235 16.3405   1
  -2   5  -5 9.64372 3.88836   7
   2  -5   5 9.46679 3.92167   1
  -2   5  -6 91.7462 10.9449   7
   2  -5   6 82.4882 10.9376   1
  -2   5  -7 60.3520 8.49779   7
   2  -5   7 60.0627 8.47536   1
  -2   5  -8 4.01992 3.48551   7
  -2   5  -9 127.266 15.0073   7
  -2   5 -10 19.2456 5.18830   7
  -2   5 -11 40.4522 7.01136   7
   2  -5  11 38.9361 7.09425   1
   2  -5  12 112.808 14.0550   1
  -2   5 -12 113.426 14.2445   7
  -2   5 -13 108.492 13.5534   7
   2  -5  13 101.150 13.3893   1
  -2   5 -14 66.1100 9.59929   7
   2  -5  14 50.4993 8.78559   1
   2  -5  15 171.400 20.0453   1
  -2   5 -15 176.471 20.4213   7
  -2   5 -16 5.84989 4.97703   7
   2  -5  16 22.7010 5.87736   1
   2  -5  17 209.191 24.9613   1
  -2   5 -17 242.231 25.7928   7
  -2   5 -18 82.8279 12.3193   7
   2  -5  18 75.2042 11.7919   1
  -2   5 -19 3.31878 5.32040   7
   2  -5  19 4.04560 4.70752   1
  -2   5 -20 3.45375 5.44367   7
   2  -5  20 3.14065 5.27045   1
  -2   5 -21 37.1259 8.08368   7
   2  -5  21 20.5794 6.96976   1
  -2   5 -22 93.3252 14.3400   7
   2  -5  22 98.5187 13.7707   1
   2  -5  23 184.886 23.5178   1
  -2   5 -23 211.818 24.5113   7
   2  -5  24 5.96757 5.35141   1
  -2   5 -24-1.33957 6.00484   7
   2  -5  25 35.6739 9.32889   1
  -2   5 -25 65.2193 11.4522   7
   2  -5  26 1.26741 6.27828   1
  -2   5 -26 2.87172 6.06598   7
   2  -5  27 18.2486 7.30011   1
  -2   5 -27 25.2312 8.13941   7
   2  -5  28 73.6735 13.0313   1
   2  -5  29 26.1797 8.50957   1
   2  -4 -31 43.5358 10.8348   7
   2  -4 -30 17.5642 7.74923   7
   2  -4 -29 8.63511 7.06419   7
   2  -4 -28-1.42287 6.25468   7
   2  -4 -27 2.72284 5.12117   7
   2  -4 -26 29.7651 8.52140   7
   2  -4 -25 84.2681 13.4530   7
   2  -4 -24 38.1812 8.99373   7
   2  -4 -24 25.8300 24.2295   2
   2  -4 -23 55.9047 11.0360   7
   2  -4 -23 143.866 30.5302   2
   2  -4 -22-1.17060 5.61885   7
   2  -4 -22 34.9715 19.2393   2
   2  -4 -21-2.33136 5.41161   7
   2  -4 -21 9.36703 13.4561   2
   2  -4 -20 28.6978 7.16083   7
   2  -4 -20 7.81642 13.0972   2
   2  -4 -19 9.54463 5.92810   7
   2  -4 -19 32.8714 12.1650   2
   2  -4 -18 33.0280 7.72052   7
   2  -4 -17 298.619 32.4961   7
   2  -4 -16 4.90223 5.22973   7
   2  -4 -15 7.13265 3.32855   1
   2  -4 -15 7.69531 5.41690   7
   2  -4 -14 1.44767 2.73277   1
   2  -4 -14 2.84792 4.48478   7
   2  -4 -13 33.3295 5.41763   1
  -2   4  12 457.703 44.2166   7
  -2   4  12 421.105 42.2398   8
   2  -4 -12 460.332 43.3208   1
  -2   4  11 620.466 55.5298   7
   2  -4 -11 535.855 54.3102   1
  -2   4  11 549.408 53.3682   8
   2  -4 -10 45.9572 6.51992   1
  -2   4  10 52.7949 5.94905   8
  -2   4  10 51.6255 7.54601   7
   2  -4  -9 78.2586 9.05690   1
  -2   4   9 63.2496 10.0040   8
  -2   4   9 86.6897 10.1672   7
  -2   4   8 532.231 46.7003   7
   2  -4  -8 492.819 45.6465   1
  -2   4   8 405.659 45.4212   8
  -2   4   7 192.910 18.8725   7
   2  -4  -7 182.112 17.9471   1
  -2   4   7 159.936 17.0907   8
  -2   4   6 175.942 17.6430   7
   2  -4  -6 171.663 16.7081   1
  -2   4   6 150.369 15.6509   8
   2  -4  -5 102.172 11.5715   1
  -2   4   5 111.446 12.4825   7
  -2   4   4 852.428 92.8877   7
   2  -4  -4 1059.50 91.6291   8
   2  -4  -4 842.563 92.2995   1
   2  -4  -3 192.469 19.9544   1
  -2   4   3 202.588 20.7058   7
   2  -4  -3 183.791 22.0936   8
   2  -4  -2 15.2695 3.34811   1
   2  -4  -2 18.3219 6.07871   8
  -2   4   2 9.22209 3.93559   7
   2  -4  -1 4.29726 5.03213   8
  -2   4   1 2.56015 3.46503   7
   2  -4  -1 4.41450 2.89509   1
   2  -4   0 1231.00 116.716   1
  -2   4   0 1215.11 117.059   7
   2  -4   0 1195.57 117.482   8
   2  -4   1 2.59833 2.96501   1
  -2   4  -1 4.98597 3.43341   7
   2  -4   1 7.04415 4.66720   8
   2  -4   2 24.3232 4.28625   1
  -2   4  -2 16.4150 4.26482   7
   2  -4   2 15.3736 5.37180   8
  -2   4  -3 4.53583 3.31481   7
   2  -4   3 0.46924 2.89591   1
   2  -4   4 463.231 48.3971   1
  -2   4  -4 522.147 48.6518   7
  -2   4  -5 11.9988 3.77175   7
  -2   4  -6 11.9012 3.92384   7
  -2   4  -7 72.0345 9.34095   7
  -2   4  -8 357.993 36.3625   7
  -2   4  -9 761.508 72.6593   7
   2  -4   9 721.164 72.4483   1
  -2   4 -10 10.6798 3.96706   7
   2  -4  10 8.78686 3.89647   1
  -2   4 -11 380.940 37.9932   7
   2  -4  11 360.794 37.6987   1
  -2   4 -12 210.969 22.8604   7
   2  -4  12 205.965 22.5594   1
  -2   4 -13 17.0553 5.13998   7
   2  -4  13 9.92868 4.04510   1
  -2   4 -14 4.07565 4.24234   7
   2  -4  14 5.90676 3.95189   1
  -2   4 -15 185.107 21.3950   7
   2  -4  15 191.567 21.1340   1
   2  -4  16 24.6620 5.88190   1
  -2   4 -16 22.4727 6.01585   7
   2  -4  17 98.1699 12.8390   1
  -2   4 -17 97.9484 13.3746   7
   2  -4  18 35.9326 7.31431   1
  -2   4 -18 34.4096 7.69380   7
   2  -4  19 36.3532 7.67411   1
  -2   4 -19 47.1664 8.44531   7
   2  -4  20 15.6191 5.47260   1
  -2   4 -20 1.06963 5.26058   7
   2  -4  21 29.4940 6.94765   1
  -2   4 -21 30.1114 7.54268   7
   2  -4  22 10.8310 5.11717   1
  -2   4 -22-1.16098 5.59442   7
   2  -4  23 156.932 19.4792   1
  -2   4 -23 164.176 20.6669   7
   2  -4  24 64.3009 11.0865   1
  -2   4 -24 76.4964 12.6821   7
   2  -4  25 37.0261 8.01486   1
  -2   4 -25 24.7261 8.46407   7
   2  -4  26 6.74194 5.03651   1
  -2   4 -26-2.69797 5.20371   7
   2  -4  27 5.79157 5.65013   1
  -2   4 -27-1.39696 5.38736   7
   2  -4  28 114.607 15.7776   1
  -2   4 -28 111.387 16.7108   7
   2  -4  29-1.22939 5.99510   1
   2  -3 -31 10.4148 6.97548   7
   2  -3 -30 7.20036 6.48520   7
   2  -3 -29 44.9786 10.2311   7
   2  -3 -28 23.3785 8.08058   7
   2  -3 -27 4.05526 6.17684   7
   2  -3 -26 20.6314 7.20942   7
   2  -3 -25-3.66492 5.87264   7
   2  -3 -24 223.864 26.1207   7
   2  -3 -23 53.6283 10.0409   7
   2  -3 -22 66.3498 11.2422   7
   2  -3 -22 93.8569 24.2533   2
   2  -3 -21 6.53568 5.62047   7
   2  -3 -21 30.9394 16.2433   2
   2  -3 -20 532.819 55.5595   2
   2  -3 -20 441.406 48.3492   7
   2  -3 -19 120.515 16.8174   7
   2  -3 -19 170.638 22.8275   2
   2  -3 -18 389.578 40.8887   7
   2  -3 -17 27.3733 6.90892   7
   2  -3 -16 47.3676 8.29171   7
   2  -3 -15 33.6615 6.84490   7
   2  -3 -14 422.691 43.5677   7
   2  -3 -13 4.24386 4.52891   7
   2  -3 -13 4.50016 2.98334   1
   2  -3 -12 57.7558 7.43640   1
  -2   3  11 23.4264 5.09021   7
   2  -3 -11 23.8007 4.20678   1
  -2   3  10 51.3096 7.17238   7
   2  -3 -10 42.0650 6.03310   1
  -2   3   9 159.453 17.5144   7
   2  -3  -9 161.050 16.7664   1
   2  -3  -8 104.753 11.5094   1
  -2   3   8 95.6953 12.1503   7
  -2   3   8 107.672 10.4468   8
   2  -3  -7 232.270 23.3470   1
  -2   3   7 230.820 24.0877   7
   2  -3  -6 623.223 60.7580   1
  -2   3   6 636.560 61.4936   7
   2  -3  -5 223.474 22.9252   1
  -2   3   5 236.380 23.7668   7
   2  -3  -4 123.948 13.6322   1
  -2   3   4 139.637 14.4906   7
   2  -3  -3 785.964 77.0246   1
  -2   3   3 824.672 77.6979   7
   2  -3  -2 445.655 42.7874   1
   2  -3  -2 403.908 42.8414   8
  -2   3   2 477.373 43.4904   7
   2  -3  -1 1049.48 101.211   1
  -2   3   1 1127.48 101.795   7
   2  -3  -1 1010.65 101.271   8
  -2   3   0 30.7728 5.00426   7
   2  -3   0 20.6986 5.03505   8
   2  -3   0 27.1611 4.44147   1
  -2   3  -1 64.7385 8.34338   7
   2  -3   1 66.9279 7.96332   1
   2  -3   2 429.945 41.5077   1
  -2   3  -2 413.731 41.6796   7
  -2   3  -3 32.4841 5.28108   7
  -2   3  -4 984.824 94.8934   7
  -2   3  -5 741.182 71.9170   7
   2  -3   6 572.448 57.8413   1
  -2   3  -6 614.017 58.0209   7
   2  -3   7 316.774 33.3066   1
  -2   3  -7 349.128 33.5733   7
   2  -3   8 352.071 36.8698   1
  -2   3  -8 387.948 37.1863   7
  -2   3  -9 63.4125 8.35428   7
   2  -3   9 60.4457 8.23067   1
  -2   3 -10 682.257 66.7948   7
   2  -3  10 679.029 66.6206   1
   2  -3  11 164.383 18.1321   2
   2  -3  11 164.539 18.0491   1
  -2   3 -11 169.713 18.3977   7
   2  -3  12 4.85084 3.95174   2
  -2   3 -12 4.68409 3.60843   7
   2  -3  12-0.58695 3.08501   1
   2  -3  13 0.64735 3.57261   2
  -2   3 -13 0.70559 3.33094   7
   2  -3  13-1.22096 3.60721   1
  -2   3 -14 29.1028 5.79757   7
   2  -3  14 24.7380 5.10262   1
  -2   3 -15 133.698 15.5193   7
   2  -3  15 124.671 14.9124   1
  -2   3 -16 107.649 12.4261   7
   2  -3  16 76.8316 11.0972   1
  -2   3 -17 81.0027 11.6947   7
   2  -3  17 89.8195 11.2320   1
  -2   3 -18 63.0985 9.34264   7
   2  -3  18 49.6124 8.18195   1
  -2   3 -19 50.7241 9.35305   7
   2  -3  19 66.8921 9.29179   1
  -2   3 -20 53.0524 9.12636   7
   2  -3  20 46.2722 8.03352   1
  -2   3 -21 86.7355 11.9580   7
   2  -3  21 68.6623 10.5264   1
  -2   3 -22-5.44752 5.71852   7
   2  -3  22-0.85803 4.91319   1
   2  -3  23 13.3348 5.40205   1
   2  -3  24 24.8615 6.28782   1
   2  -3  25 18.1250 6.06111   1
   2  -3  26 77.0406 11.6789   1
   2  -3  27 26.5811 6.94573   1
   2  -3  28 101.527 14.6099   1
   2  -2 -31-5.89873 7.85487   7
   2  -2 -30 15.6280 7.97871   7
   2  -2 -29-1.36926 5.78296   7
   2  -2 -28 55.7364 10.6824   7
   2  -2 -27 223.154 26.5094   7
   2  -2 -26 18.9839 7.21147   7
   2  -2 -25-6.12606 6.27415   7
   2  -2 -24 28.7452 7.25001   7
   2  -2 -23 2.19855 5.36362   7
   2  -2 -22 14.5661 6.03944   7
   2  -2 -21 50.4262 18.0960   2
   2  -2 -21 31.2153 7.64126   7
   2  -2 -20 175.917 25.1505   2
   2  -2 -20 115.996 16.0187   7
   2  -2 -19 156.616 21.9696   2
   2  -2 -19 132.335 17.1727   7
   2  -2 -18 176.516 21.9784   7
   2  -2 -18 232.583 25.8266   2
   2  -2 -17 144.394 17.2776   7
   2  -2 -16 213.613 23.7927   7
   2  -2 -15-2.45714 4.00008   7
   2  -2 -14 196.453 21.8778   7
   2  -2 -13 5.35426 3.76351   7
   2  -2 -12 33.5456 6.68846   7
   2  -2 -11-0.39545 2.70553   1
  -2   2  10 13.5132 3.94829   7
   2  -2 -10 13.9661 3.32121   1
  -2   2   9 49.4512 6.79950   7
   2  -2  -9 42.5579 5.94338   1
  -2   2   8 8.14938 3.36063   7
   2  -2  -8 7.54779 2.58828   1
  -2   2   7 0.90484 2.99706   7
   2  -2  -7 1.23368 2.09581   1
  -2   2   6 1.68738 2.10109   1
   2  -2  -6 2.92284 2.50816   1
  -2   2   6-2.59882 3.05705   7
  -2   2   5 345.305 32.5364   7
   2  -2  -5 315.383 31.8176   1
  -2   2   5 320.095 31.7858   1
   2  -2  -4 7.08440 2.59596   1
  -2   2   4 8.06700 3.56852   7
   2  -2  -4 3.06912 2.98722   7
  -2   2   4 5.04653 2.38412   1
  -2   2   3 781.158 74.3190   1
   2  -2  -3 752.633 74.7513   7
  -2   2   3 800.548 74.9120   7
   2  -2  -3 766.624 74.3343   1
  -2   2   2 57.0238 6.80243   1
  -2   2   2 58.4287 7.49718   7
   2  -2  -2 53.5336 6.69569   1
   2  -2  -2 65.1733 7.46676   7
  -2   2   1 283.668 27.8607   1
   2  -2  -1 286.435 27.8612   1
   2  -2  -1 271.455 28.1541   7
  -2   2   1 288.053 28.4252   7
  -2   2   0 134.188 14.7418   1
   2  -2   0 144.435 14.8462   1
   2  -2   0 150.591 15.2380   7
  -2   2   0 151.358 15.4030   7
  -2   2  -1 2.85661 2.95741   7
   2  -2   1 8.39804 3.04079   7
  -2   2  -1 8.49342 2.52544   1
  -2   2  -2 119.365 12.8144   7
   2  -2   2 116.924 12.6163   7
   2  -2   3 17.9762 3.68060   7
  -2   2  -3 17.5893 3.84465   7
   2  -2   4 7.37927 3.07210   1
  -2   2  -4 16.3025 3.65577   7
   2  -2   5 0.35492 2.56178   1
  -2   2  -5 2.29170 2.87207   7
  -2   2  -6 358.506 35.7973   7
   2  -2   6 363.185 35.7115   1
   2  -2   7 4.71387 2.88991   1
  -2   2  -7 2.17366 2.61479   7
  -2   2  -8 325.501 32.2921   7
   2  -2   8 316.776 32.0795   1
   2  -2   9 99.2028 12.4752   2
  -2   2  -9 110.912 12.5146   7
   2  -2   9 114.691 12.2801   1
  -2   2 -10 75.4146 8.86561   7
   2  -2  10 64.8526 8.40025   1
   2  -2  10 62.0614 8.94196   2
   2  -2  11 103.910 13.4870   2
   2  -2  11 122.663 13.0358   1
   2  -2  12 91.5870 11.4500   2
   2  -2  12 84.4729 10.4438   1
   2  -2  13 27.3252 5.17437   1
   2  -2  13 31.3996 6.41034   2
   2  -2  14 143.156 18.1223   2
   2  -2  14 168.419 17.3505   1
   2  -2  15 10.1019 3.77472   1
   2  -2  16 30.9635 5.60262   1
   2  -2  17 100.462 12.1790   1
   2  -2  18 89.4542 11.1694   1
   2  -2  19 11.2249 4.16169   1
   2  -2  20-0.68709 3.65112   1
   2  -2  21 77.8583 10.4292   1
   2  -2  22 5.95023 4.24115   1
   2  -2  23 11.5903 4.62554   1
  -2   2 -23 28.7718 7.44767   7
   2  -2  24 2.40697 3.88837   1
  -2   2 -24 14.4493 6.23215   7
   2  -2  25 4.99663 4.39468   1
  -2   2 -25 35.8842 7.93696   7
   2  -2  26 51.8420 8.55755   1
  -2   2 -26 47.0120 9.72274   7
   2  -2  27-1.79312 4.76994   1
  -2   2 -27-3.76117 6.30565   7
  -2   2 -28 89.8760 14.1246   7
  -2   2 -29 24.3420 8.06675   7
  -2   2 -30 8.42558 6.89279   7
   2  -1 -31 29.2766 8.53963   7
   2  -1 -30 1.40839 6.19101   7
   2  -1 -29 39.1846 9.10463   7
   2  -1 -28 11.6825 6.89432   7
   2  -1 -27 133.686 18.0440   7
   2  -1 -26 35.1510 8.68550   7
   2  -1 -25 48.3413 9.38165   7
   2  -1 -24 72.5275 11.5612   7
   2  -1 -23 38.1845 8.23732   7
   2  -1 -22 28.7403 6.76270   7
   2  -1 -21 67.0918 10.3082   7
   2  -1 -20 10.4060 14.3685   2
   2  -1 -20 5.54587 4.87943   7
   2  -1 -19 18.5584 11.3440   2
   2  -1 -19 26.7207 6.57399   7
   2  -1 -18 58.0713 12.2844   2
   2  -1 -18 49.8205 8.51479   7
   2  -1 -17 13.0155 6.96098   2
   2  -1 -17 6.14127 4.72670   7
   2  -1 -16 62.0452 9.32168   7
   2  -1 -15 12.3172 4.74212   7
   2  -1 -14 8.76593 4.34987   7
   2  -1 -13 4.17601 3.67020   7
   2  -1 -12 236.791 25.1747   7
   2  -1 -11 59.5077 8.82532   7
   2  -1 -10 100.733 12.3973   7
  -2   1   9 110.936 12.4076   7
   2  -1  -9 104.404 11.5923   1
  -2   1   8 0.44160 3.18459   7
  -2   1   8-2.51922 3.14818   8
   2  -1  -8 0.32178 2.36983   1
  -2   1   7 58.9722 6.97397   7
  -2   1   7 45.0708 6.05872   1
  -2   1   7 42.7069 6.34186   8
   2  -1  -7 55.9203 6.40168   1
  -2   1   6 2.54092 2.92382   8
  -2   1   6 5.33321 3.17917   7
  -2   1   6 2.36286 2.30311   1
   2  -1  -6 2.79158 2.24948   1
  -2   1   5 684.410 71.3677   8
  -2   1   5 757.793 71.2960   1
   2  -1  -5 760.489 71.3475   1
  -2   1   5 767.713 71.7801   7
   2  -1  -5 752.898 71.8441   7
  -2   1   4 966.131 91.6705   8
  -2   1   4 947.109 91.5036   7
   2  -1  -4 935.698 91.5228   7
  -2   1   4 983.089 91.1083   1
   2  -1  -4 930.679 91.1178   1
  -2   1   3 2039.94 195.673   7
   2  -1  -3 2055.94 195.251   1
  -2   1   3 2063.79 195.209   1
  -2   1   2 499.593 49.9064   7
   2  -1  -2 508.482 49.5196   1
  -2   1   2 529.367 49.5219   1
  -2   1   1 20.3025 3.35559   1
   2  -1   2 184.189 18.4447   1
  -2   1  -3 3258.47 309.659   1
   2  -1   3 3272.69 309.741   1
   2  -1   4 454.078 43.4962   1
  -2   1  -4 442.921 43.3882   1
   2  -1   5 2886.13 266.277   1
  -2   1  -5 2731.46 266.142   1
  -2   1  -6 11.9342 2.97868   1
   2  -1   6 12.7020 3.16656   1
   2  -1   6 10.2766 4.60578   2
  -2   1  -7 24.9548 4.04117   1
   2  -1   7 28.8735 4.33965   1
   2  -1   7 32.3904 5.74011   2
   2  -1   8 471.371 46.6514   2
   2  -1   8 465.344 45.5848   1
   2  -1   9 208.549 24.1430   2
   2  -1   9 239.243 23.1197   1
   2  -1  10 1.85080 2.54198   1
   2  -1  10 4.02422 4.59366   2
   2  -1  11 32.5953 4.97879   1
  -2   1 -11 35.5174 5.71478   7
   2  -1  11 32.4856 6.64012   2
   2  -1  12 87.5610 9.62786   1
  -2   1 -12 80.2379 10.0475   7
   2  -1  12 72.2314 11.1418   2
   2  -1  13 52.9009 7.24633   1
   2  -1  13 59.4093 9.97840   2
  -2   1 -13 65.7448 8.22147   7
   2  -1  14 79.9352 9.99633   1
  -2   1 -14 93.6914 11.0577   7
   2  -1  15 48.5898 6.81474   1
  -2   1 -15 54.5656 7.88640   7
   2  -1  16 162.894 18.5861   1
  -2   1 -16 198.086 19.9616   7
   2  -1  17 16.3881 4.14183   1
  -2   1 -17 15.9514 4.78758   7
   2  -1  18 69.0602 9.29597   1
  -2   1 -18 84.8462 10.6670   7
  -2   1 -19 34.5256 7.15660   7
   2  -1  20 1.75444 3.10790   1
  -2   1 -20-0.88434 3.88708   7
   2  -1  21 6.71613 3.89923   1
  -2   1 -21 9.27548 4.98130   7
   2  -1  22 25.4849 5.56518   1
  -2   1 -22 41.7888 7.62684   7
   2  -1  23 0.66555 3.34481   1
  -2   1 -23-1.01067 4.69094   7
   2  -1  24 8.33595 4.24925   1
  -2   1 -24 17.9103 5.77624   7
   2  -1  25 10.8725 4.35230   1
  -2   1 -25 9.90629 5.69996   7
  -2   1 -26 48.1107 9.32596   7
  -2   1 -27 10.7079 5.61425   7
  -2   1 -28 22.3102 7.62145   7
  -2   1 -29 21.9124 7.73506   7
  -2   1 -30 26.8009 8.85746   7
  -2   1 -31 41.7778 9.43794   7
   2   0 -31-5.85012 6.57326   7
   2   0 -30 19.5935 7.17271   7
   2   0 -29 29.5412 8.33152   7
   2   0 -28 3.85813 5.44240   7
   2   0 -27 2.46445 6.01232   7
   2   0 -26-1.18098 5.29021   7
   2   0 -25 120.125 16.2331   7
   2   0 -24 3.28807 5.51698   7
   2   0 -23 62.6830 10.5955   7
   2   0 -22 210.352 24.2478   7
   2   0 -21 45.3451 8.72519   7
   2   0 -20 17.4455 5.55904   7
   2   0 -19 6.95927 4.60786   7
   2   0 -18 5.70791 4.62589   7
   2   0 -18-1.80409 10.0850   2
   2   0 -17 77.9810 11.1256   7
   2   0 -17 94.2560 14.3336   2
   2   0 -16 105.255 14.2034   2
  -2   0   9 173.571 18.9852   8
  -2   0   8 19.9807 5.32274   8
  -2   0   7 29.0903 5.98777   8
  -2   0   6 3.52504 2.39932   1
  -2   0   6 3.27296 4.34284   8
   2   0  -6-0.56695 2.49599   1
   2   0  -5 91.1482 10.6600   8
  -2   0   5 77.1032 11.0825   8
  -2   0   5 95.9803 9.69445   1
   2   0  -5 95.3245 9.77399   1
   2   0  -5 79.9876 9.92892   7
  -2   0   4 246.437 26.5311   8
   2   0  -4 278.343 25.8560   8
   2   0  -4 242.231 24.9055   1
  -2   0   4 250.480 24.8836   1
   2   0  -4 256.950 25.2789   7
   2   0  -3 1793.22 160.555   8
  -2   0   3 1757.50 161.667   8
  -2   0   3 1588.21 159.383   1
   2   0  -3 1709.02 159.773   7
   2   0  -2 2989.63 276.590   8
  -2   0   2 2606.73 275.533   8
   2   0  -2 3061.82 275.053   7
   2   0  -1 2398.84 259.160   8
  -2   0   1 2929.77 258.487   8
  -2   0   1 2541.58 258.861   7
   2   0  -1 2840.26 258.977   7
   2   0   0 76.8019 7.97750   8
   2   0   0 82.3138 8.57427   7
  -2   0   0 75.2934 8.50705   7
   2   0   0 70.4514 8.11472   1
  -2   0   0 82.8144 8.18009   1
   2   0   1 1271.42 118.275   7
  -2   0  -1 1213.47 118.279   7
  -2   0  -1 1255.70 118.011   1
   2   0   1 1224.26 118.014   1
  -2   0  -2 27.4876 3.30105   1
   2   0   2 20.6524 3.27259   1
  -2   0  -2 21.6039 3.53358   7
   2   0   2 24.5120 3.77121   7
  -2   0  -3 152.952 15.0373   1
   2   0   3 156.103 15.1003   1
   2   0   3 151.427 16.4254   2
   2   0   3 147.361 15.2432   7
  -2   0  -3 146.229 15.2823   7
  -2   0  -4 279.599 27.6310   1
   2   0   4 284.095 27.6917   1
   2   0   4 274.787 29.0131   2
   2   0   4 284.746 27.8183   7
  -2   0  -4 296.328 27.9831   7
   2   0   5 140.624 14.1154   1
   2   0   5 137.551 15.9016   2
  -2   0  -5 139.359 14.0237   1
   2   0   5 137.009 14.2857   7
  -2   0  -5 142.120 14.4732   7
  -2   0  -6 180.012 18.4089   7
   2   0   6 180.617 18.0728   1
   2   0   6 172.146 18.2624   7
  -2   0  -6 183.985 17.9941   1
  -2   0  -6 201.980 20.1582   2
   2   0   6 176.135 19.7646   2
  -2   0  -7 413.556 38.8116   7
   2   0   7 419.836 38.4257   1
  -2   0  -7 394.855 40.0249   2
   2   0   7 384.042 40.1299   2
  -2   0  -7 390.938 38.2581   1
   2   0   7 365.418 38.4929   7
  -2   0  -8 357.774 34.8126   7
  -2   0  -8 363.935 36.1351   2
   2   0   8 347.062 36.3078   2
   2   0   8 358.418 34.3984   1
  -2   0  -8 340.630 34.2403   1
  -2   0  -9 187.449 19.4360   7
  -2   0  -9 190.655 18.8085   1
   2   0   9 183.690 18.8647   1
  -2   0  -9 183.274 20.7233   2
   2   0   9 190.727 21.2391   2
  -2   0 -10 270.475 28.5117   1
   2   0  10 294.502 28.7240   1
  -2   0 -10 315.469 29.4681   7
   2   0  10 287.099 31.2604   2
  -2   0 -10 306.604 30.6685   2
   2   0  11 262.864 26.7137   1
  -2   0 -11 290.279 27.5558   7
   2   0  11 261.310 29.8109   2
  -2   0 -11 257.964 28.5063   2
   2   0  12 289.941 29.4080   1
  -2   0 -12 319.773 30.3493   7
  -2   0 -12 281.034 31.2128   2
   2   0  13 95.4229 10.9732   1
  -2   0 -13 116.790 12.1597   7
  -2   0 -13 93.3634 12.9986   2
  -2   0 -14 2.26680 3.13064   7
  -2   0 -14 3.32254 4.64179   2
   2   0  14 0.72549 2.14799   1
  -2   0 -15 7.83679 3.69548   7
  -2   0 -15 11.2294 5.75595   2
   2   0  15 5.74528 2.51269   1
  -2   0 -16 2.56177 3.18547   7
  -2   0 -16 1.78328 4.93014   2
   2   0  16 4.04237 2.60167   1
  -2   0 -17 48.0424 7.01705   7
  -2   0 -17 44.1177 8.33566   2
   2   0  17 36.2046 5.64514   1
  -2   0 -18-1.43079 3.48798   7
  -2   0 -18 0.94620 5.15784   2
   2   0  18 0.89682 2.50472   1
  -2   0 -19 98.9085 12.2232   7
  -2   0 -19 90.4605 13.5538   2
   2   0  19 96.6147 11.1760   1
  -2   0 -20 35.7691 8.34955   2
   2   0  20 35.1591 5.59127   1
  -2   0 -20 31.1151 6.55282   7
   2   0  21 23.8836 4.68950   1
  -2   0 -21 24.3406 5.91601   7
   2   0  22 5.98693 3.30623   1
  -2   0 -22 13.2488 5.05058   7
   2   0  23-4.56170 3.50750   1
  -2   0 -23-5.56110 5.13712   7
  -2   0 -24 1.94637 4.28090   7
  -2   0 -25 32.6855 7.64045   7
  -2   0 -26-2.15204 4.82326   7
  -2   0 -27 46.5219 9.39200   7
  -2   0 -28-1.19601 5.64722   7
  -2   0 -29 39.7177 9.09752   7
  -2   0 -30 16.7300 7.36030   7
  -2   0 -31 6.67868 6.74256   7
   2   1 -30 78.5039 13.3858   7
   2   1 -29-2.69115 6.03153   7
  -2  -1  28 31.3028 8.55620   1
  -2  -1  27 12.4744 6.98466   1
  -2  -1  26-3.58455 6.76153   1
  -2  -1  25 41.4884 9.02723   1
   2   1 -17-0.77401 3.89057   7
   2   1 -16 251.240 30.3141   7
   2   1 -16 404.855 34.5513   2
   2   1 -15 9.48020 4.08997   7
   2   1 -15 21.2538 6.75837   2
   2   1 -14 126.350 13.2618   2
   2   1 -14 94.3202 12.6960   7
   2   1 -13 11.6648 3.86474   7
   2   1 -12 49.1070 7.33443   7
   2   1 -11-3.36440 3.49954   7
   2   1 -10 142.421 15.7386   7
   2   1  -9 35.8960 5.73553   7
   2   1  -8 144.966 15.6551   7
   2   1  -7 699.056 62.9571   7
  -2  -1   7 568.439 63.8505   8
  -2  -1   6 155.923 18.9531   8
   2   1  -6 183.822 18.8325   8
   2   1  -6 184.304 17.3883   7
   2   1  -6 148.600 16.8034   7
   2   1  -5 213.922 21.3152   7
   2   1  -5 233.636 23.2302   8
  -2  -1   5 187.770 23.2496   8
   2   1  -4 247.535 25.3737   7
  -2  -1   4 259.441 25.4782   7
   2   1  -4 282.147 27.4901   8
  -2  -1   4 255.640 27.9487   8
   2   1  -3 961.571 93.2564   7
  -2  -1   3 998.088 93.2637   7
  -2  -1   3 965.531 96.1596   8
   2   1  -3 961.589 95.1159   8
   2   1  -2 1350.22 129.546   2
  -2  -1   2 1350.59 132.668   8
   2   1  -2 1363.68 131.543   8
  -2  -1   2 1352.68 128.951   7
   2   1  -2 1417.53 129.069   7
   2   1  -2 1360.99 128.963   1
  -2  -1   2 1301.38 128.911   1
   2   1  -1 3261.71 304.094   2
   2   1  -1 3063.08 306.411   8
  -2  -1   1 2730.84 305.290   8
  -2  -1   1 3171.38 303.261   7
   2   1  -1 3371.09 303.391   7
   2   1  -1 3254.82 303.258   1
  -2  -1   1 3151.13 303.217   1
  -2  -1   0 447.286 41.4325   2
   2   1   0 424.228 41.4366   2
   2   1   0 338.142 41.7200   8
  -2  -1   0 503.491 40.8341   8
   2   1   0 439.390 40.3476   7
  -2  -1   0 405.072 40.2198   7
   2   1   0 380.080 40.1399   1
  -2  -1   0 422.341 40.1792   1
  -2  -1  -1 2148.97 221.493   2
   2   1   1 2323.13 221.664   2
   2   1   1 2360.19 220.454   7
  -2  -1  -1 2242.32 220.451   7
  -2  -1  -1 2270.07 220.307   1
   2   1   1 2314.07 220.334   1
  -2  -1  -1 2341.40 220.609   8
   2   1   1 2597.81 220.783   8
  -2  -1  -2 148.559 13.7888   1
   2   1   2 133.688 13.7422   1
   2   1   2 141.361 13.8917   7
  -2  -1  -2 134.184 13.9529   7
   2   1   3 1133.19 107.761   7
  -2  -1  -3 1115.25 107.803   7
  -2  -1  -3 1163.12 107.616   1
   2   1   3 1116.11 107.607   1
   2   1   4 1418.32 133.187   7
  -2  -1  -4 1433.51 133.262   7
  -2  -1  -4 1390.81 132.964   1
  -2  -1  -4 1418.20 135.013   2
   2   1   4 1417.44 135.145   2
   2   1   4 1375.28 132.967   1
  -2  -1  -5 125.655 14.0721   2
   2   1   5 107.348 11.0906   1
  -2  -1  -5 110.378 11.0715   1
   2   1   5 111.377 11.4476   7
  -2  -1  -5 114.223 11.5062   7
   2   1   5 123.784 14.2618   2
   2   1   6 327.740 32.5458   7
  -2  -1  -6 315.005 34.6586   2
   2   1   6 326.838 35.0068   2
   2   1   6 336.492 32.2133   1
  -2  -1  -6 350.039 32.6723   7
  -2  -1  -6 333.235 32.1811   1
  -2  -1  -7 16.2813 2.27245   1
   2   1   7 17.5521 7.40695   2
  -2  -1  -7 24.8302 6.48579   2
   2   1   7 10.4006 2.29176   1
   2   1   7 10.0833 2.75783   7
  -2  -1  -7 16.7367 3.19485   7
   2   1   8 22.1592 8.75562   2
  -2  -1  -8 15.4974 6.63149   2
  -2  -1  -8 15.2030 2.46464   1
   2   1   8 13.4950 2.54049   1
  -2  -1  -8 16.6257 3.36827   7
   2   1   8 15.8206 2.99318   7
  -2  -1  -9 154.528 15.4295   7
  -2  -1  -9 144.698 17.6964   2
  -2  -1  -9 141.936 14.6052   1
   2   1   9 149.159 14.7870   1
  -2  -1 -10 3.47936 5.75868   2
  -2  -1 -10-0.74226 2.35078   7
   2   1  10-0.42802 1.81690   1
  -2  -1 -11 45.9595 8.85389   2
  -2  -1 -11 52.3088 6.65189   7
   2   1  11 47.5286 5.77707   1
  -2  -1 -12 33.7459 7.88545   2
  -2  -1 -12 30.0830 5.10654   7
   2   1  12 34.4560 4.39127   1
  -2  -1 -13 84.3089 10.9678   2
  -2  -1 -13 54.9517 7.30692   7
   2   1  13 51.5079 6.41076   1
  -2  -1 -14 8.33900 5.98315   2
  -2  -1 -14 16.1037 3.93674   7
   2   1  14 20.0100 3.11222   1
  -2  -1 -15 27.0274 7.35965   2
  -2  -1 -15 30.1895 4.84341   7
   2   1  15 19.2572 3.50866   1
  -2  -1 -16 58.2263 10.8645   2
  -2  -1 -16 65.6055 8.36291   7
   2   1  16 59.3004 7.20366   1
  -2  -1 -17 3.47522 6.08322   2
  -2  -1 -17 6.12523 3.31545   7
   2   1  17 2.77567 2.10120   1
  -2  -1 -18 5.85192 3.64452   7
   2   1  18 4.05345 2.19839   1
  -2  -1 -19 107.236 14.4007   2
  -2  -1 -19 91.6155 11.3490   7
   2   1  19 84.3573 10.1474   1
  -2  -1 -20-0.73106 3.62292   7
  -2  -1 -20 3.74396 6.18094   2
   2   1  20 2.47903 2.59712   1
  -2  -1 -21 58.0602 8.70859   7
  -2  -1 -21 33.0802 9.97993   2
   2   1  21 65.1086 7.54168   1
  -2  -1 -22 44.0526 7.51025   7
  -2  -1 -23 1.71957 4.12912   7
  -2  -1 -24 23.5403 6.15118   7
  -2  -1 -25 2.86131 4.51063   7
  -2  -1 -26 35.2316 7.60030   7
  -2  -1 -27 5.28437 5.01420   7
  -2  -1 -28 3.32625 5.41493   7
  -2  -1 -29 27.8840 7.42175   7
  -2  -1 -30 6.16844 5.65661   7
  -2  -1 -31 10.3961 6.60444   7
  -2  -1 -32 8.06513 6.39124   7
  -2  -2  29 22.4192 8.74070   1
   2   2 -29 17.5831 7.04198   7
  -2  -2  28 15.7801 8.04204   1
   2   2 -28 14.2564 7.29073   7
  -2  -2  27-1.38084 5.95194   1
   2   2 -27-1.24222 5.56468   7
  -2  -2  26-2.64416 6.65946   1
   2   2 -26 11.8868 5.72191   7
  -2  -2  25 7.57304 6.52836   1
   2   2 -25-2.26266 5.16123   7
  -2  -2  24 158.342 19.0308   1
   2   2 -24 125.187 17.4532   7
  -2  -2  23 6.96308 5.84018   1
   2   2 -23 1.02942 4.44655   7
   2   2 -22 119.602 16.8405   7
  -2  -2  22 167.388 18.6410   1
   2   2 -21 39.1743 7.76205   7
   2   2 -20 11.5361 5.13258   7
   2   2 -19 29.5439 6.33167   7
   2   2 -18 21.7324 5.31841   7
   2   2 -17 114.480 14.1045   7
   2   2 -16-0.73651 3.59160   7
   2   2 -15 572.022 57.0359   7
   2   2 -14 186.253 20.3979   7
   2   2 -13 645.380 63.5476   7
   2   2 -12 357.551 36.1601   7
   2   2 -11 343.173 33.1165   7
   2   2 -11 322.025 31.5745   2
   2   2 -10 32.9352 5.29663   7
   2   2 -10 31.9038 4.09777   2
   2   2  -9 390.345 38.3213   7
   2   2  -9 383.091 37.2777   2
   2   2  -8 1083.20 99.9230   7
   2   2  -8 1015.24 99.0310   2
   2   2  -7 502.212 48.4974   7
   2   2  -7 491.162 47.9213   2
   2   2  -6 272.670 26.6505   2
   2   2  -6 240.946 26.3682   7
   2   2  -6 293.271 26.9283   7
   2   2  -6 296.669 29.3608   8
   2   2  -5 864.937 78.8583   2
   2   2  -5 734.091 78.2972   7
   2   2  -5 865.040 78.7417   7
   2   2  -5 953.103 81.4328   8
  -2  -2   5 804.586 81.4706   8
   2   2  -4 1798.76 163.084   2
   2   2  -4 1557.30 162.298   7
   2   2  -4 1792.78 162.636   7
   2   2  -4 1902.62 165.344   8
  -2  -2   4 1734.37 165.875   8
   2   2  -3 1404.93 134.102   2
  -2  -2   3 1469.47 133.953   2
   2   2  -3 1347.98 133.119   7
   2   2  -3 1417.24 133.326   7
   2   2  -3 1476.66 136.414   8
  -2  -2   3 1329.53 137.095   8
   2   2  -2 3.91552 1.83093   7
   2   2  -2 2.59209 2.12177   7
   2   2  -2 1.85648 4.72690   2
  -2  -2   2 3.74050 3.39432   2
  -2  -2   2 8.10813 10.4873   8
  -2  -2   1 1951.40 227.229   8
   2   2  -1 2351.80 222.634   7
  -2  -2   1 2390.24 222.603   7
   2   2  -1 2365.90 224.206   2
  -2  -2   1 2330.18 223.948   2
  -2  -2   0 431.242 42.3446   7
   2   2   0 443.951 42.4642   7
   2   2   0 482.317 44.7851   2
  -2  -2   0 444.281 44.2014   2
  -2  -2   0 449.677 42.6193   1
   2   2   1 136.232 13.5902   2
  -2  -2  -1 96.0733 12.1281   2
  -2  -2  -1 94.0345 9.46978   1
  -2  -2  -1 86.6186 9.19142   7
   2   2   1 93.7953 9.27567   7
  -2  -2  -2 36.0926 4.04859   1
  -2  -2  -2 32.2431 3.95901   7
   2   2   2 37.6732 3.90793   7
  -2  -2  -2 41.0194 7.61994   2
   2   2   2 48.8769 9.20781   2
   2   2   3 10.8421 1.69390   7
   2   2   3 5.59981 2.73226   8
  -2  -2  -3 10.3525 1.68534   1
  -2  -2  -3 11.1522 1.87633   7
   2   2   3 12.3230 8.05160   2
  -2  -2  -4 0.75711 1.40976   7
   2   2   4-0.22453 1.23924   7
   2   2   4-0.27965 2.37392   8
   2   2   4 0.54849 1.03321   1
  -2  -2  -4-0.07668 1.00681   1
  -2  -2  -5 231.093 22.1670   7
  -2  -2  -5 255.555 25.8747   2
   2   2   5 220.326 22.0990   7
  -2  -2  -6 242.273 22.8610   7
   2   2   6 216.556 22.7361   7
  -2  -2  -6 245.605 26.5836   2
   2   2   6 313.984 29.7471   2
  -2  -2  -7 666.294 64.1042   1
  -2  -2  -7 701.905 68.2650   2
   2   2   7 654.772 64.7471   7
  -2  -2  -7 727.775 64.8387   7
  -2  -2  -8 140.821 17.5832   2
   2   2   8 130.295 13.5063   7
  -2  -2  -8 123.097 13.4282   7
   2   2   8 132.004 12.7033   1
  -2  -2  -9 126.064 17.4188   2
   2   2   9 129.547 12.6191   1
   2   2   9 123.267 13.3934   7
  -2  -2  -9 130.545 13.4045   7
  -2  -2 -10 515.116 52.9309   2
   2   2  10 515.743 48.4999   1
  -2  -2 -10 485.299 49.1901   7
  -2  -2 -11 322.221 36.6584   2
   2   2  11 332.878 32.1490   1
  -2  -2 -11 336.434 32.9869   7
  -2  -2 -12 55.9408 10.9224   2
   2   2  12 47.8078 5.37408   1
  -2  -2 -12 46.8588 6.23711   7
  -2  -2 -13 16.6991 8.08842   2
   2   2  13 27.4980 3.44781   1
  -2  -2 -13 20.7204 4.08839   7
  -2  -2 -14 3.97893 6.46851   2
   2   2  14 1.28022 1.47989   1
  -2  -2 -14 2.69372 2.65760   7
  -2  -2 -15 78.8848 9.90440   7
   2   2  15 82.9425 8.89230   1
  -2  -2 -15 103.117 14.8907   2
  -2  -2 -16-1.39956 6.29073   2
  -2  -2 -16 6.23386 3.05081   7
   2   2  16 6.07729 1.97642   1
  -2  -2 -17 97.3996 14.5241   2
  -2  -2 -17 75.1473 9.53359   7
   2   2  17 74.7806 8.47953   1
  -2  -2 -18 227.616 25.0478   2
  -2  -2 -18 208.364 20.7016   7
   2   2  18 177.461 19.2172   1
  -2  -2 -19 3.00018 7.19884   2
  -2  -2 -19-1.89786 3.49173   7
   2   2  19-0.31618 1.96590   1
  -2  -2 -20 47.2382 11.0222   2
  -2  -2 -20 38.3590 6.72005   7
  -2  -2 -21 4.67290 7.62933   2
  -2  -2 -21 8.57768 4.10527   7
  -2  -2 -22 1.58395 7.62409   2
  -2  -2 -22 7.57425 4.06755   7
  -2  -2 -23 84.9939 15.4305   2
  -2  -2 -23 88.2016 11.7593   7
  -2  -2 -24 63.5776 9.76665   7
  -2  -2 -25 72.5466 10.7506   7
  -2  -2 -26 67.2103 10.2770   7
  -2  -2 -27 12.9463 5.82360   7
  -2  -2 -28 8.38489 5.47780   7
  -2  -2 -29 15.4799 6.12879   7
  -2  -2 -30 26.6751 7.70191   7
  -2  -2 -31 152.312 19.6765   7
  -2  -2 -32 3.84845 5.54019   7
  -2  -3  31 18.8908 9.41459   1
  -2  -3  30 1.67414 8.03540   1
  -2  -3  29 22.8540 9.25355   1
   2   3 -29 21.9508 8.29348   7
  -2  -3  28-1.57779 9.32384   1
   2   3 -28-1.31398 5.66410   7
  -2  -3  27-6.08471 7.53183   1
   2   3 -27 10.0714 6.04160   7
  -2  -3  26 14.6223 7.69819   1
   2   3 -26 15.6632 6.13757   7
  -2  -3  25 21.0473 8.27252   1
   2   3 -25 14.9939 6.18020   7
  -2  -3  24 1.34631 6.58088   1
   2   3 -24 7.71099 5.71598   7
  -2  -3  23 105.277 14.3505   1
   2   3 -23 72.5557 12.0847   7
  -2  -3  22 136.096 16.1569   1
   2   3 -22 87.1790 13.7479   7
  -2  -3  21 10.5311 6.54007   1
   2   3 -21-0.95040 4.56672   7
  -2  -3  20 27.9698 7.50247   1
   2   3 -20 21.6837 5.90418   7
  -2  -3  19 1.07091 4.97056   1
   2   3 -19-0.85741 3.69501   7
   2   3 -18 62.4590 9.56933   7
   2   3 -17 9.96232 4.01946   7
   2   3 -16 8.68539 4.30991   7
   2   3 -15 179.920 19.8823   7
   2   3 -14 142.930 16.1948   7
   2   3 -13 111.217 13.1374   7
   2   3 -12 26.0176 5.07695   7
   2   3 -11 231.760 24.1012   7
   2   3 -10 69.7916 8.86197   7
   2   3  -9 9.56771 3.24543   7
   2   3  -8 194.909 22.4325   7
   2   3  -8 237.858 21.9624   2
   2   3  -7 166.525 15.5136   2
   2   3  -7 115.339 13.9040   7
   2   3  -7 130.642 17.1983   8
  -2  -3   6 617.884 64.5801   2
   2   3  -6 591.362 67.1151   8
   2   3  -6 639.096 64.6662   7
  -2  -3   5 49.2539 6.88525   2
   2   3  -5 81.7047 10.6958   2
  -2  -3   5 47.9854 6.14905   7
   2   3  -5 47.0603 6.03511   7
  -2  -3   4 1262.21 132.219   7
   2   3  -4 1371.98 132.255   7
  -2  -3   4 1386.62 133.089   2
   2   3  -3 665.433 67.1229   7
  -2  -3   3 686.971 68.4639   2
  -2  -3   2 702.127 64.0645   2
   2   3  -2 699.011 62.0639   7
   2   3  -2 573.500 61.8367   7
   2   3  -1 31.7044 3.97077   7
   2   3  -1 30.9181 11.5795   8
  -2  -3   1 42.9247 7.83599   2
   2   3  -1 38.6199 4.13047   7
   2   3   0 81.4597 8.19395   7
   2   3   0 81.0815 8.24968   7
  -2  -3   0 78.9200 11.8649   2
  -2  -3   0 79.6395 18.1173   8
   2   3   0 91.4202 16.2954   8
  -2  -3  -1 359.121 37.1523   2
   2   3   1 295.741 39.6286   8
  -2  -3  -1 306.157 36.9890   8
   2   3   2 27.1790 12.0494   8
  -2  -3  -2 36.5645 5.80291   8
   2   3   2 53.5495 13.8051   2
  -2  -3  -2 30.1793 9.38623   2
   2   3   3 9.06713 7.42633   8
  -2  -3  -3 24.2732 4.21905   8
   2   3   3 37.3072 14.0000   2
  -2  -3  -3 25.1252 8.83392   2
  -2  -3  -4 57.1114 7.60984   8
  -2  -3  -4 59.5402 12.5754   2
  -2  -3  -4 64.9883 6.44667   1
   2   3   4 62.6605 8.52897   8
   2   3   5 14.5149 2.12181   7
   2   3   5 12.1928 3.73238   8
  -2  -3  -5 13.9818 2.04733   7
  -2  -3  -6 111.938 11.1134   7
   2   3   6 115.263 12.1634   8
   2   3   6 107.206 11.1894   7
  -2  -3  -7-2.75726 8.90975   2
  -2  -3  -7 6.98513 1.89228   7
   2   3   7 6.75333 2.96455   8
   2   3   7 4.86165 2.05436   7
   2   3   8 20.9508 3.21014   7
  -2  -3  -8 17.3081 2.89453   7
  -2  -3  -8 18.7694 9.48111   2
   2   3   9 206.717 20.1040   7
  -2  -3  -9 226.565 26.2125   2
  -2  -3  -9 189.650 19.7831   7
  -2  -3 -10 111.619 17.6167   2
   2   3  10 116.319 12.0457   7
  -2  -3 -10 107.105 11.6937   7
  -2  -3 -11 7.61490 2.34716   7
  -2  -3 -11 11.2631 9.12386   2
  -2  -3 -12 15.2256 3.34561   7
   2   3  12 18.2390 2.21132   1
   2   3  12 19.2052 2.25072   1
  -2  -3 -12 26.6967 9.80280   2
  -2  -3 -13 11.1578 2.99854   7
   2   3  13 10.6004 1.85290   1
   2   3  13 15.2793 1.96952   1
  -2  -3 -13 8.48945 8.48865   2
   2   3  14 297.789 27.4716   1
  -2  -3 -14 342.066 35.2641   2
  -2  -3 -14 256.904 28.3903   7
   2   3  14 277.318 27.4027   1
  -2  -3 -15 8.75406 9.17925   2
   2   3  15 0.80478 1.31112   1
  -2  -3 -15 0.44114 2.31410   7
  -2  -3 -16 1.79595 8.64932   2
   2   3  16 8.19574 1.82835   1
  -2  -3 -16 7.14428 3.02127   7
   2   3  17-1.21519 1.60496   1
  -2  -3 -17-2.56376 2.69122   7
  -2  -3 -18 12.8267 9.71817   2
  -2  -3 -18 15.9459 4.03806   7
  -2  -3 -19 22.2199 10.0758   2
  -2  -3 -19 14.6974 4.07024   7
  -2  -3 -20-7.49262 8.84353   2
  -2  -3 -20-0.62675 2.96116   7
  -2  -3 -21 15.0597 9.45402   2
  -2  -3 -21 26.6740 5.52960   7
  -2  -3 -22 3.82360 8.56367   2
  -2  -3 -22 1.41836 3.62004   7
  -2  -3 -23 21.2734 10.1761   2
  -2  -3 -23 19.5514 5.16085   7
  -2  -3 -24 11.7040 10.1058   2
  -2  -3 -24 5.57555 4.04857   7
  -2  -3 -25 83.6791 11.8803   7
  -2  -3 -26 97.3457 13.0623   7
  -2  -3 -27 37.8592 7.79272   7
  -2  -3 -28 15.9713 5.64695   7
  -2  -3 -29 17.8778 6.11246   7
  -2  -3 -30 26.6523 7.59293   7
  -2  -3 -31 7.00387 6.07277   7
  -2  -3 -32 58.8621 10.9190   7
  -2  -3 -33 62.0918 11.6788   7
  -2  -4  30 106.580 18.2162   1
   2   4 -29 4.25096 6.35340   7
  -2  -4  29 1.75564 8.01280   1
   2   4 -28 48.7683 10.4948   7
  -2  -4  28 49.5062 12.0385   1
   2   4 -27 1.29490 5.49054   7
  -2  -4  27 13.2791 7.72057   1
   2   4 -26 24.8161 7.94966   7
  -2  -4  26 64.3166 11.7681   1
   2   4 -25-4.73555 5.95294   7
  -2  -4  25 4.65438 7.56675   1
   2   4 -24 106.417 15.1536   7
  -2  -4  24 113.359 16.6941   1
   2   4 -23 33.4830 7.71937   7
  -2  -4  23 17.1452 7.96763   1
   2   4 -22 4.12554 5.03625   7
  -2  -4  22 1.36636 6.01127   1
   2   4 -21 30.4408 7.40820   7
  -2  -4  21 34.0620 9.24857   1
   2   4 -20 13.0847 5.67113   7
  -2  -4  20 29.9891 8.38054   1
   2   4 -19-0.88743 4.19025   7
  -2  -4  19 8.30843 6.55093   1
   2   4 -18 0.84192 4.04535   7
  -2  -4  18-5.65236 6.00972   1
  -2  -4  17 178.719 18.9155   1
   2   4 -17 121.972 16.3587   7
  -2  -4  16 341.338 31.8063   1
   2   4 -16 252.275 29.7559   7
  -2  -4  15 21.1472 6.00420   1
   2   4 -15 23.4159 5.57070   7
  -2  -4  14 10.9235 5.13727   1
   2   4 -14 5.98816 3.87398   7
  -2  -4  13 15.4713 5.14636   1
   2   4 -13 5.59770 3.61224   7
   2   4 -12 26.6551 5.15317   7
   2   4 -11-2.15167 3.04699   7
   2   4 -10 13.4239 3.65553   7
   2   4  -9 46.5748 6.42107   7
   2   4  -8 160.206 16.3753   7
  -2  -4   8 149.330 15.8163   2
   2   4  -7 104.434 11.6547   7
  -2  -4   7 107.149 11.8775   2
   2   4  -6 206.039 21.2904   7
  -2  -4   6 217.018 22.1295   2
  -2  -4   5 3.89480 2.17918   7
  -2  -4   5 6.47339 4.21609   2
   2   4  -5 7.40594 2.37213   7
  -2  -4   4 289.237 29.0648   2
   2   4  -4 285.098 31.3909   8
  -2  -4   4 246.077 26.6835   7
   2   4  -4 292.697 26.8453   7
  -2  -4   3 1.96918 1.87850   7
   2   4  -3 8.94067 8.01916   8
  -2  -4   3-0.85285 5.55674   2
   2   4  -3 4.09928 1.88073   7
   2   4  -2 13.6612 2.40342   7
   2   4  -2 6.66659 9.89424   8
  -2  -4   2 12.0803 2.30392   7
   2   4  -2 11.3557 5.33235   2
  -2  -4   2 23.6732 8.02325   2
   2   4  -1 29.6910 7.11195   2
   2   4  -1 19.6403 2.69499   7
  -2  -4   1 17.1807 2.71919   7
  -2  -4   1 44.6583 9.61656   2
  -2  -4   1 23.6852 3.68629   1
   2   4  -1 20.8696 9.99655   8
  -2  -4   0 598.297 53.2269   2
   2   4   0 492.408 47.4420   7
  -2  -4   0 501.428 48.2130   1
   2   4   0 465.385 53.2200   8
  -2  -4  -1 16.1035 8.48034   2
  -2  -4  -1 10.2641 2.36302   1
   2   4   1 11.5366 10.6774   8
  -2  -4  -2 372.152 36.5202   1
   2   4   2 315.734 42.9534   8
  -2  -4  -3 171.978 21.8660   2
   2   4   3 108.807 22.3181   8
  -2  -4  -3 145.281 14.5148   1
   2   4   4 65.9686 14.9866   8
  -2  -4  -4 62.6929 6.83198   1
  -2  -4  -5 76.4295 15.1159   2
   2   4   5 52.0409 10.9038   8
  -2  -4  -5 57.2903 6.01155   1
  -2  -4  -6 280.890 27.6063   1
  -2  -4  -6 292.525 27.6965   7
   2   4   6 319.854 30.2932   8
  -2  -4  -6 289.678 27.7717   7
  -2  -4  -7 33.3682 4.13532   7
   2   4   7 39.6308 5.95389   8
  -2  -4  -7 34.6449 3.96705   7
  -2  -4  -8-0.16946 1.31503   7
  -2  -4  -8 1.85706 10.8557   2
   2   4   8 0.44302 2.90823   8
  -2  -4  -8 1.19484 1.58287   7
  -2  -4  -9 288.314 31.2264   2
  -2  -4  -9 227.956 22.4851   7
  -2  -4  -9 216.753 22.2824   7
   2   4   9 240.615 23.5726   8
   2   4  10 74.1381 8.58206   8
  -2  -4 -10 66.2644 7.41221   7
  -2  -4 -10 59.8281 7.16026   7
  -2  -4 -10 77.0537 15.6101   2
   2   4  11 32.2952 5.12653   8
  -2  -4 -11 23.6737 3.70184   7
  -2  -4 -11 36.7960 12.3341   2
  -2  -4 -12 60.1842 7.22684   7
  -2  -4 -12 86.0250 15.9249   2
  -2  -4 -13 348.090 35.3624   7
  -2  -4 -13 464.064 44.9043   2
  -2  -4 -14 111.226 12.2592   7
  -2  -4 -14 132.359 20.5604   2
  -2  -4 -15 116.182 13.0860   7
  -2  -4 -15 153.004 21.8376   2
  -2  -4 -16 110.815 12.7207   7
  -2  -4 -16 149.105 21.3970   2
  -2  -4 -17 44.9988 14.1966   2
  -2  -4 -17 31.9940 5.15052   7
  -2  -4 -18 20.5189 11.8277   2
  -2  -4 -18 9.25244 3.24163   7
  -2  -4 -19 59.2732 14.9625   2
  -2  -4 -19 62.8672 8.36314   7
  -2  -4 -20 6.90107 9.08619   2
  -2  -4 -20-1.76900 3.25576   7
  -2  -4 -21 389.208 43.5778   2
  -2  -4 -21 340.243 35.6267   7
  -2  -4 -22 6.99345 11.1963   2
  -2  -4 -22 4.69415 3.63920   7
  -2  -4 -23 2.32051 10.7886   2
  -2  -4 -23 7.13010 3.79000   7
  -2  -4 -24 14.0554 11.5674   2
  -2  -4 -24 20.4196 5.37124   7
  -2  -4 -25 44.6152 14.2742   2
  -2  -4 -25 25.6859 6.18514   7
  -2  -4 -26 9.37360 4.84162   7
  -2  -4 -27-0.90040 3.80276   7
  -2  -4 -28-1.90776 5.39413   7
  -2  -4 -29 28.2840 7.20230   7
  -2  -4 -30-3.18912 5.02741   7
  -2  -4 -31 198.357 23.6200   7
  -2  -5  28 147.325 19.5113   1
   2   5 -28 84.4475 15.3423   7
  -2  -5  27 8.94816 8.47352   1
   2   5 -27 5.40688 7.21125   7
  -2  -5  26 13.8785 8.79548   1
   2   5 -26 11.6288 5.68795   7
  -2  -5  25 47.0821 10.8008   1
   2   5 -25 29.7458 8.49219   7
  -2  -5  24 19.5064 8.77033   1
   2   5 -24 23.7498 7.73373   7
  -2  -5  23 39.3609 11.1750   1
   2   5 -23 23.8197 7.14094   7
  -2  -5  22 22.7039 8.69553   1
   2   5 -22 4.31387 5.16247   7
  -2  -5  21 18.8807 8.27460   1
   2   5 -21 37.0069 7.69207   7
  -2  -5  20 11.1204 7.07873   1
   2   5 -20 12.7187 5.77088   7
  -2  -5  19 55.6347 10.3302   1
   2   5 -19 30.6733 7.16740   7
  -2  -5  18 22.7215 7.90575   1
   2   5 -18 12.3731 5.25965   7
  -2  -5  17 379.070 36.2723   1
   2   5 -17 290.314 33.6507   7
  -2  -5  16 285.685 27.9351   1
   2   5 -16 210.244 25.3141   7
  -2  -5  15 13.9755 5.92868   1
   2   5 -15 13.4376 4.94337   7
   2   5 -14 16.8379 4.72009   7
   2   5 -13 111.944 13.3920   7
   2   5 -12 9.23324 3.66444   7
   2   5 -11 57.4054 7.99845   7
  -2  -5  10 41.9874 5.52298   2
  -2  -5  10 52.9427 8.07198   1
   2   5 -10 45.7078 6.67046   7
  -2  -5   9 48.6301 7.01939   2
   2   5  -9 62.7268 7.66497   7
  -2  -5   9 56.8482 8.64730   1
  -2  -5   8 544.695 56.1120   2
   2   5  -8 569.965 55.9583   7
  -2  -5   8 616.839 57.1643   1
   2   5  -7 3.69010 2.31219   7
  -2  -5   7 6.33273 4.14812   2
  -2  -5   7 7.02150 3.95759   1
   2   5  -7 8.64644 8.06341   8
  -2  -5   6 205.062 22.5149   2
  -2  -5   6 215.829 21.4272   1
   2   5  -6 187.429 20.1905   7
   2   5  -6 188.817 24.5285   8
   2   5  -5 156.068 15.7367   7
   2   5  -5 133.640 19.9267   8
  -2  -5   5 149.205 16.5765   1
  -2  -5   5 149.038 18.6479   2
   2   5  -4 152.561 15.2701   7
  -2  -5   4 126.156 14.9673   7
   2   5  -4 170.055 20.5031   8
  -2  -5   4 168.625 16.3717   1
  -2  -5   4 180.378 19.7723   2
   2   5  -3 0.99721 1.84778   7
   2   5  -3-1.43023 7.40227   8
  -2  -5   3 4.23542 1.78178   7
  -2  -5   3 5.10468 2.95445   1
  -2  -5   2 258.724 28.0802   7
   2   5  -2 293.912 33.6807   8
   2   5  -2 306.728 28.2559   7
  -2  -5   2 302.773 29.1893   1
  -2  -5   1 287.608 30.0838   7
   2   5  -1 345.261 36.6396   8
   2   5  -1 316.089 30.1929   7
  -2  -5   1 338.411 31.2200   1
  -2  -5   0 84.1549 13.9265   2
  -2  -5   0 59.0397 6.35626   7
  -2  -5   0 72.2062 7.56300   1
   2   5   0 61.2345 6.47725   7
   2   5   0 51.9488 13.1934   8
   2   5   1 16.1789 9.96473   8
  -2  -5  -1 13.1825 1.82951   7
  -2  -5  -1 27.6904 10.6452   2
  -2  -5  -1 23.2197 3.19223   1
   2   5   1 16.2791 2.04861   7
  -2  -5  -2 5.29967 1.88340   1
  -2  -5  -2 1.81257 9.38688   2
   2   5   2 10.7345 10.9152   8
  -2  -5  -3 2.18197 1.73698   1
  -2  -5  -3 7.67135 10.4566   2
   2   5   3 1.97128 10.7478   8
  -2  -5  -4 206.037 20.6641   1
   2   5   4 208.349 29.1759   8
  -2  -5  -4 244.366 29.4058   2
   2   5   5-2.10970 11.2089   8
  -2  -5  -5 0.18855 1.36942   1
  -2  -5  -5 2.05883 11.0817   2
  -2  -5  -6 121.781 11.8934   7
  -2  -5  -6 129.738 12.3180   1
  -2  -5  -6 157.957 22.3618   2
  -2  -5  -6 121.443 11.9913   7
  -2  -5  -7 620.629 55.6982   1
  -2  -5  -7 735.141 66.3699   2
  -2  -5  -7 578.081 55.7438   7
  -2  -5  -7 558.692 55.5856   7
   2   5   7 505.108 60.4676   8
  -2  -5  -8 63.1216 6.72640   7
   2   5   8 44.9951 9.33869   8
  -2  -5  -8 68.8162 6.23139   1
  -2  -5  -8 52.5259 6.40374   7
  -2  -5  -9 148.526 14.6867   7
  -2  -5  -9 135.666 14.3949   7
   2   5   9 177.785 17.1793   8
  -2  -5 -10 0.26853 1.78145   7
   2   5  10 2.94177 3.47836   8
  -2  -5 -10 1.65628 1.40972   7
  -2  -5 -10-2.37595 10.6413   2
  -2  -5 -11 6.73627 2.33134   7
  -2  -5 -11 9.65850 13.0102   2
  -2  -5 -11 5.04112 1.82962   7
   2   5  11 10.4965 3.82548   8
   2   5  12 65.2077 8.02396   8
  -2  -5 -12 50.8858 6.38753   7
  -2  -5 -12 66.9190 16.4039   2
  -2  -5 -13 348.946 38.9160   2
   2   5  13 306.202 29.5190   8
  -2  -5 -13 268.031 28.0324   7
   2   5  14 7.36599 3.50643   8
  -2  -5 -14 18.0236 12.1657   2
  -2  -5 -14 4.09194 2.33281   7
  -2  -5 -15 190.722 21.3407   7
   2   5  15 231.555 22.8704   8
  -2  -5 -16 207.709 29.0640   2
  -2  -5 -16 174.035 18.4937   7
  -2  -5 -17 7.58348 3.08766   7
  -2  -5 -17 34.8310 14.9879   2
  -2  -5 -18-1.93770 2.86611   7
  -2  -5 -18 5.38723 12.0643   2
  -2  -5 -19 269.701 32.0080   2
  -2  -5 -19 180.381 20.1259   7
  -2  -5 -20 57.6625 8.15252   7
  -2  -5 -20 85.6271 18.2507   2
  -2  -5 -21 52.0637 7.57272   7
  -2  -5 -21 39.1033 15.0110   2
  -2  -5 -22 18.5374 4.91594   7
  -2  -5 -22 44.0256 14.9392   2
  -2  -5 -23 13.6265 4.38811   7
  -2  -5 -23 14.0332 13.3123   2
  -2  -5 -24 15.9253 5.12854   7
  -2  -5 -24 58.4616 16.3757   2
  -2  -5 -25 13.0680 4.64116   7
  -2  -5 -25 25.1740 14.3250   2
  -2  -5 -26 26.1062 6.17656   7
  -2  -5 -26 25.0476 13.1481   2
  -2  -6  27 3.85169 8.30495   1
   2   6 -27 2.84514 6.60983   7
  -2  -6  26 102.892 16.9377   1
   2   6 -26 80.7072 14.3019   7
  -2  -6  25 7.24941 8.55569   1
   2   6 -25-2.61114 5.95429   7
  -2  -6  24 22.8159 9.86585   1
   2   6 -24 7.47793 6.17700   7
  -2  -6  23 11.8600 8.27795   1
   2   6 -23 2.38875 6.02631   7
  -2  -6  22 21.2232 9.22824   1
   2   6 -22-3.43408 5.31543   7
  -2  -6  21 157.134 19.3628   1
   2   6 -21 103.944 15.7029   7
  -2  -6  20 108.651 16.4353   1
   2   6 -20 90.8077 13.4894   7
  -2  -6  19 92.5434 14.0797   1
   2   6 -19 63.7527 10.8783   7
  -2  -6  18 73.3902 13.3731   1
   2   6 -18 85.1051 11.8097   7
  -2  -6  17 25.1499 8.64227   1
   2   6 -17 29.6640 6.82818   7
   2   6 -16 153.444 18.1004   7
   2   6 -15 185.473 21.0996   7
   2   6 -14 363.639 37.6293   7
   2   6 -13 28.6945 6.38015   7
  -2  -6  13 53.4155 8.91502   1
   2   6 -12 17.5078 4.91351   7
  -2  -6  12 16.1251 6.34907   1
   2   6 -11 30.8371 6.06629   7
  -2  -6  11 51.2187 8.49901   1
   2   6 -10 56.7953 8.55720   7
  -2  -6  10 81.9299 10.8097   1
   2   6  -9 59.3136 7.80318   7
  -2  -6   9 49.4592 8.12440   2
  -2  -6   9 56.7276 8.91604   1
   2   6  -8 25.1947 4.90437   7
  -2  -6   8 27.2979 6.15467   1
  -2  -6   8 33.0773 7.15416   2
  -2  -6   7 104.740 12.3603   1
  -2  -6   7 95.0781 13.6729   2
   2   6  -7 90.2167 11.0444   7
   2   6  -7 99.2882 15.9757   8
   2   6  -6 408.353 42.5379   8
  -2  -6   6 435.163 41.3162   2
  -2  -6   6 380.713 38.3089   1
   2   6  -6 348.537 37.0792   7
   2   6  -5 6.96075 2.61980   7
  -2  -6   5 9.66999 8.21033   2
   2   6  -5 15.6551 8.25490   8
  -2  -6   5 14.4514 4.25257   1
   2   6  -4 341.601 38.5086   8
  -2  -6   4 433.427 40.2211   2
  -2  -6   4 364.101 34.5439   1
   2   6  -4 311.317 33.2430   7
   2   6  -3 12.6283 3.03771   7
   2   6  -3 26.8779 8.86739   8
  -2  -6   3 19.7420 3.12938   7
  -2  -6   3 26.9102 9.95785   2
  -2  -6   3 16.0500 4.01306   1
  -2  -6   2 136.982 19.7119   2
  -2  -6   2 102.356 11.5438   7
   2   6  -2 120.319 11.8578   7
   2   6  -2 112.848 17.3540   8
  -2  -6   2 120.889 12.9311   1
  -2  -6   1 1.43395 1.33793   7
   2   6  -1 1.70339 1.61777   7
   2   6  -1 3.24716 8.96153   8
  -2  -6   1 1.35798 2.40998   1
  -2  -6   0 41.0105 12.7064   2
   2   6   0 24.8398 3.34484   7
  -2  -6   0 21.8658 2.94398   7
   2   6   0 15.1234 9.77121   8
  -2  -6   0 33.4181 4.45218   1
  -2  -6  -1 136.370 14.1356   7
  -2  -6  -1 182.932 23.9495   2
   2   6   1 134.311 20.7488   8
  -2  -6  -1 149.224 15.3122   1
   2   6   1 156.590 14.3868   7
  -2  -6  -2 138.197 14.7012   1
  -2  -6  -2 180.432 23.6975   2
   2   6   2 127.822 20.7110   8
  -2  -6  -3-0.31965 1.78586   1
   2   6   3 1.87696 10.1028   8
  -2  -6  -3-4.76881 11.4423   2
  -2  -6  -4 371.536 37.0274   1
   2   6   4 336.616 43.7241   8
   2   6   5 56.0695 15.9901   8
  -2  -6  -5 76.3612 8.27091   1
  -2  -6  -5 78.6210 18.7401   2
   2   6   6 199.473 30.1412   8
  -2  -6  -6 199.465 20.3795   1
  -2  -6  -7 11.1118 1.58186   7
  -2  -6  -7 8.19556 1.95147   1
   2   6   7 9.66677 12.8646   8
  -2  -6  -7 15.8255 13.2794   2
  -2  -6  -7 6.82679 1.31923   7
  -2  -6  -8 39.3996 4.02934   1
  -2  -6  -8 34.1437 3.94946   7
   2   6   8 19.9341 12.4685   8
  -2  -6  -8 28.4795 3.65420   7
  -2  -6  -9 19.1288 3.09527   7
  -2  -6  -9 19.0207 2.70734   7
  -2  -6  -9 22.6873 2.64830   1
   2   6   9 30.1855 11.5481   8
  -2  -6 -10 57.1019 6.24766   7
   2   6  10 55.3992 12.1420   8
   2   6  11 4.38597 5.75666   8
  -2  -6 -11 3.25950 1.65050   7
  -2  -6 -11-2.86263 12.5844   2
   2   6  12-4.27911 4.72396   8
  -2  -6 -12 2.87495 12.3898   2
  -2  -6 -12-0.49993 1.71239   7
  -2  -6 -13 88.7943 10.3560   7
  -2  -6 -13 141.616 23.8844   2
   2   6  13 126.478 13.1874   8
   2   6  14 62.3296 8.26392   8
  -2  -6 -14 46.4827 6.24076   7
  -2  -6 -14 76.8585 19.5090   2
   2   6  15 77.1607 9.03963   8
  -2  -6 -15 54.4648 17.6738   2
  -2  -6 -15 47.6656 6.62324   7
   2   6  16 43.7929 6.96917   8
  -2  -6 -16 52.0163 17.2158   2
  -2  -6 -16 31.5604 5.01043   7
   2   6  17 0.72380 3.96079   8
  -2  -6 -17 5.46376 2.63523   7
  -2  -6 -17-6.26461 15.7457   2
  -2  -6 -18-12.6174 15.6177   2
   2   6  18-2.27320 4.79922   8
  -2  -6 -18 1.36804 2.63666   7
  -2  -6 -19 1.48234 2.59159   7
   2   6  19 0.79121 4.09230   8
  -2  -6 -19-12.6786 14.4559   2
   2   6  20 57.0360 9.58656   8
  -2  -6 -20 82.7084 20.9390   2
   2   6  21-1.72647 4.70605   8
  -2  -6 -21 12.7260 15.0192   2
   2   6  22 72.2926 11.0094   8
  -2  -6 -22 97.5999 21.8179   2
   2   6  23 1.88666 4.87886   8
  -2  -6 -23-6.57357 14.9902   2
  -2  -6 -24 9.69677 13.6786   2
  -2  -6 -25 3.29347 11.7080   2
  -2  -6 -26 26.0906 15.8437   2
  -2  -6 -27-3.27247 14.3851   2
   2   7 -26 87.7903 14.5501   7
  -2  -7  25 21.2433 9.91554   1
   2   7 -25 8.07151 6.85987   7
  -2  -7  24 13.1179 8.32737   1
   2   7 -24 12.9706 6.63388   7
  -2  -7  23 34.5436 10.7484   1
   2   7 -23 9.97722 6.90210   7
  -2  -7  22-7.02213 8.01338   1
   2   7 -22-1.19942 5.67201   7
  -2  -7  21 15.2018 8.49598   1
   2   7 -21-1.15010 5.53020   7
  -2  -7  20 8.11014 7.92232   1
   2   7 -20 3.30733 5.79888   7
  -2  -7  19 138.328 18.0611   1
   2   7 -19 95.8908 14.5329   7
   2   7 -18 16.0886 6.25442   7
   2   7 -17 39.2531 8.13652   7
   2   7 -16 2.72567 4.57334   7
  -2  -7  15 123.114 16.0236   1
   2   7 -15 92.1670 13.3433   7
   2   7 -14 149.650 19.3791   7
  -2  -7  14 217.617 22.4272   1
  -2  -7  13 77.1167 11.0690   1
   2   7 -13 49.7828 8.76089   7
   2   7 -12 130.043 16.6455   7
  -2  -7  12 171.805 18.9996   1
  -2  -7  11 92.2102 12.6430   1
   2   7 -11 78.5809 10.8627   7
  -2  -7  10 31.8214 7.39996   1
   2   7 -10 20.6732 4.86668   7
  -2  -7   9 69.7890 9.40043   1
   2   7  -9 42.9182 7.34291   7
  -2  -7   8 100.534 14.8144   2
   2   7  -8 101.322 11.5739   7
  -2  -7   8 87.5159 12.6382   1
   2   7  -7 26.7100 4.66240   7
  -2  -7   7 17.7165 8.59178   2
  -2  -7   7 19.8795 5.66382   1
   2   7  -6 290.607 35.0838   8
  -2  -7   6 344.497 35.9273   2
  -2  -7   6 294.426 31.1121   1
   2   7  -6 287.242 29.8294   7
   2   7  -5 31.0890 9.65833   8
  -2  -7   5 19.4164 5.17594   1
  -2  -7   5 33.7234 11.4462   2
   2   7  -5 22.4236 4.22336   7
   2   7  -4 111.782 12.7096   7
  -2  -7   4 124.733 14.0513   1
  -2  -7   4 130.756 20.1465   2
   2   7  -4 116.302 18.2093   8
  -2  -7   3 7.76911 3.46654   1
   2   7  -3-6.83729 8.72030   8
   2   7  -3 2.01370 2.18257   7
  -2  -7   3 6.24144 9.82540   2
  -2  -7   2-0.55335 2.97880   1
   2   7  -2 1.71542 7.96213   8
   2   7  -2-0.88962 2.16924   7
  -2  -7   2 6.63352 9.90287   2
   2   7  -1 70.0126 7.88724   7
   2   7  -1 79.3239 14.6591   8
  -2  -7   1 65.6085 8.73610   1
   2   7   0 21.0445 10.1574   8
  -2  -7   0 20.8666 4.44998   1
   2   7   0 24.0404 3.45810   7
  -2  -7  -1 705.267 68.2942   1
   2   7   1 683.493 67.1206   7
   2   7   1 725.456 74.0290   8
  -2  -7  -2 461.350 45.9977   2
   2   7   2 331.138 32.6696   7
  -2  -7  -2 354.062 33.9661   1
   2   7   2 339.965 39.8768   8
   2   7   3 76.9318 14.7674   8
  -2  -7  -3 59.4778 7.56627   1
  -2  -7  -3 81.2723 18.5530   2
   2   7   4 81.2450 16.4559   8
  -2  -7  -4 97.6490 10.8137   1
  -2  -7  -4 129.554 22.8411   2
  -2  -7  -5 29.6030 15.8014   2
  -2  -7  -5 15.2603 3.06539   1
   2   7   5 22.7116 10.7846   8
  -2  -7  -6 106.645 21.8149   2
  -2  -7  -6 80.7175 9.18231   1
   2   7   6 101.741 19.0278   8
   2   7   7 26.9822 13.8942   8
  -2  -7  -7 23.8102 3.63239   1
  -2  -7  -7 40.8121 16.3980   2
   2   7   8 28.5190 15.1590   8
  -2  -7  -8 47.3576 5.67681   1
   2   7   9-8.13771 14.0382   8
  -2  -7  -9-3.17331 14.2221   2
   2   7  10 2.72710 14.3069   8
  -2  -7 -10 9.66494 15.7162   2
   2   7  11 2.48865 11.1479   8
   2   7  12 74.7807 16.9459   8
   2   7  13 71.8137 16.4926   8
  -2  -7 -13 184.355 28.6926   2
   2   7  14-9.06344 8.85017   8
  -2  -7 -14 6.79305 14.9388   2
   2   7  15 108.448 15.6297   8
  -2  -7 -15 113.492 24.3013   2
   2   7  16 11.9138 6.07841   8
  -2  -7 -16-17.3525 17.7060   2
   2   7  17 9.64837 5.88714   8
  -2  -7 -17 7.09908 14.6983   2
   2   7  18 11.8550 5.32634   8
  -2  -7 -18-10.8133 18.1303   2
   2   7  19 125.673 16.4613   8
  -2  -7 -19 171.714 29.4927   2
   2   7  20 27.7014 6.75918   8
  -2  -7 -20 14.6790 15.3635   2
  -2  -7 -21 7.35933 16.4941   2
  -2  -7 -22 22.0840 17.7857   2
  -2  -7 -23 14.8662 16.3938   2
  -2  -7 -24 7.58635 14.2686   2
  -2  -7 -25 14.8391 16.6734   2
  -2  -7 -26-3.75216 15.1727   2
  -2  -7 -27 11.2129 15.1469   2
  -2  -7 -28 14.9763 14.8555   2
   2   8 -25 41.5306 9.97058   7
   2   8 -24 33.3999 8.88367   7
  -2  -8  23-1.92001 8.77810   1
   2   8 -23 11.6061 6.60413   7
  -2  -8  22 1.85065 8.74575   1
   2   8 -22 6.20459 6.42982   7
  -2  -8  21 33.8112 9.64614   1
   2   8 -21 3.57670 6.09953   7
   2   8 -20 14.8705 6.31544   7
   2   8 -19 7.66878 5.94115   7
   2   8 -18 24.0863 7.01278   7
  -2  -8  17 76.5464 13.0511   1
   2   8 -17 46.8991 9.57598   7
  -2  -8  16 21.5339 8.56403   1
   2   8 -16 28.4893 6.84438   7
  -2  -8  15 23.1893 8.00667   1
   2   8 -15 17.1491 5.84402   7
  -2  -8  14-2.58843 5.79641   1
   2   8 -14 0.85593 4.30192   7
  -2  -8  13 1.22612 5.17716   1
   2   8 -13-0.80902 4.83098   7
  -2  -8  12 47.5634 9.39222   1
   2   8 -12 36.0224 7.19457   7
  -2  -8  11 6.54859 6.02752   1
   2   8 -11 0.72094 3.78626   7
  -2  -8  10 21.6312 6.67108   1
   2   8 -10 15.5513 4.69973   7
  -2  -8   9 884.067 83.9987   1
   2   8  -9 818.224 82.3487   7
  -2  -8   8 89.8695 11.5840   1
   2   8  -8 64.6724 9.38405   7
  -2  -8   7 70.0721 9.50022   1
   2   8  -7 51.4457 7.90873   7
  -2  -8   6 29.2976 11.0265   2
   2   8  -6 11.5928 8.79975   8
  -2  -8   6 16.0687 5.33422   1
   2   8  -5 54.3517 13.1259   8
  -2  -8   5 52.2062 8.10291   1
  -2  -8   5 44.6063 13.7035   2
   2   8  -4 68.1373 14.3285   8
  -2  -8   4 63.6253 9.34085   1
  -2  -8   4 75.3320 16.7046   2
   2   8  -3-3.65332 8.33277   8
  -2  -8   3-0.67568 3.49880   1
  -2  -8   3-7.28009 12.5506   2
   2   8  -2-1.82753 8.91053   8
  -2  -8   2 1.91496 3.48022   1
  -2  -8   2-5.13579 13.6435   2
   2   8  -1 197.257 26.5914   8
  -2  -8   1 190.970 21.2309   1
  -2  -8   1 254.330 32.1017   2
  -2  -8   0 2.29337 2.88495   1
  -2  -8   0-2.84479 11.7597   2
   2   8   0-1.82934 8.34428   8
  -2  -8  -1 10.8539 3.42720   1
  -2  -8  -1 20.9034 13.1627   2
   2   8   1 5.54542 8.49090   8
  -2  -8  -2 14.7657 3.73799   1
   2   8   2 24.4570 10.1062   8
  -2  -8  -2 15.6681 11.8668   2
   2   8   3 212.122 29.5809   8
  -2  -8  -3 230.233 23.9880   1
   2   8   4 211.437 29.6844   8
  -2  -8  -4 223.877 23.5144   1
   2   8   5 230.906 34.4584   8
  -2  -8  -5 296.799 29.1681   1
  -2  -8  -5 357.513 43.9339   2
  -2  -8  -6 175.684 18.6012   1
  -2  -8  -6 228.550 33.2666   2
   2   8   7-6.60597 11.2337   8
  -2  -8  -7 3.55968 15.9461   2
   2   8   8-7.28435 13.2358   8
  -2  -8  -8 14.2771 15.3816   2
   2   8   9 23.3038 14.5372   8
  -2  -8  -9 36.7421 18.9242   2
   2   8  10 13.8746 15.7541   8
  -2  -8 -10 55.3436 19.8045   2
   2   8  11 142.638 28.3132   8
  -2  -8 -11 272.914 36.7831   2
   2   8  12 79.6869 21.9641   8
   2   8  13 9.37669 14.0259   8
   2   8  14 6.00142 13.6853   8
  -2  -8 -14-7.65653 17.7686   2
   2   8  15 11.3137 13.8447   8
  -2  -8 -15 15.6502 17.5652   2
   2   8  16 29.8711 13.6393   8
  -2  -8 -16 47.4597 20.1539   2
  -2  -8 -17 3.98377 16.1092   2
  -2  -8 -18-4.01363 18.3088   2
  -2  -8 -19 53.5762 22.7536   2
  -2  -8 -20 45.8658 21.0950   2
  -2  -8 -21 4.18088 18.0216   2
  -2  -8 -22 16.7373 18.8063   2
  -2  -8 -23 29.2499 19.2567   2
  -2  -8 -24 37.8846 18.4904   2
  -2  -8 -25 12.8721 16.5831   2
  -2  -8 -26 16.7557 16.2237   2
  -2  -8 -27-4.22950 16.7099   2
  -2  -8 -28 8.52899 16.0415   2
  -2  -8 -29 8.41922 16.2454   2
  -2  -9  20 14.6689 8.76643   1
  -2  -9  19 1.75350 8.55093   1
  -2  -9  18 5.02790 8.18513   1
  -2  -9  17 67.0070 12.7687   1
  -2  -9  16 56.2507 11.8274   1
  -2  -9  15 130.170 18.6769   1
  -2  -9  14 219.823 26.7697   1
  -2  -9  13 40.4117 9.76688   1
  -2  -9  12 7.43073 5.98447   1
  -2  -9  11-2.34661 5.98679   1
  -2  -9  10 106.815 14.9154   1
  -2  -9   9 40.0625 8.54231   1
  -2  -9   8 136.731 17.4147   1
  -2  -9   7 90.7112 12.6142   1
  -2  -9   6 114.725 14.8224   1
  -2  -9   5 41.3328 14.0591   2
   2   9  -5 24.4125 12.2399   8
  -2  -9   5 53.7465 8.56160   1
  -2  -9   4 31.2749 14.2632   2
   2   9  -4 41.5133 12.1711   8
  -2  -9   4 35.6637 7.01969   1
  -2  -9   3 16.6151 13.0928   2
   2   9  -3 3.87437 8.54453   8
  -2  -9   3 7.69863 4.04710   1
   2   9  -2 219.092 30.7793   8
  -2  -9   2 242.675 26.2579   1
  -2  -9   1 6.16555 13.8973   2
   2   9  -1 17.1980 10.4072   8
  -2  -9   1 18.1076 4.87650   1
   2   9   0 158.812 24.4040   8
  -2  -9   0 224.565 32.0909   2
  -2  -9   0 180.261 19.7631   1
  -2  -9  -1 10.6735 3.80797   1
   2   9   1 11.4714 9.23079   8
  -2  -9  -1 9.99642 13.5088   2
  -2  -9  -2 84.7514 10.2259   1
   2   9   2 49.9203 14.2929   8
  -2  -9  -3 64.1832 7.72918   1
   2   9   3 19.5197 11.4920   8
  -2  -9  -3 42.8520 18.3607   2
  -2  -9  -4 31.7787 5.33726   1
  -2  -9  -4 29.2220 17.7741   2
   2   9   4 27.6219 11.7807   8
  -2  -9  -5 14.9648 17.3648   2
   2   9   5-2.02933 8.74601   8
  -2  -9  -6 57.5277 22.4628   2
   2   9   6 64.2766 14.9389   8
  -2  -9  -7 51.1476 22.7794   2
   2   9   7 34.0385 12.9457   8
  -2  -9  -8 555.029 58.4747   2
   2   9   8 348.874 46.3712   8
  -2  -9  -9 36.4100 19.5726   2
   2   9   9 22.7245 11.8514   8
  -2  -9 -10 126.736 28.5579   2
   2   9  10 75.9607 18.0231   8
  -2  -9 -11 37.1580 21.4660   2
   2   9  11 18.5151 13.0859   8
  -2  -9 -12 16.6555 17.9566   2
   2   9  12 2.84645 12.0376   8
  -2  -9 -13 20.9976 20.2502   2
  -2  -9 -16 79.3294 23.3844   2
  -2  -9 -17 13.2872 20.5955   2
  -2  -9 -18-4.51347 17.8318   2
  -2  -9 -19 50.2123 23.4268   2
  -2  -9 -20-13.8278 19.9064   2
  -2  -9 -21-4.68450 18.5075   2
  -2  -9 -22-4.68045 23.1779   2
  -2  -9 -23 4.67279 18.8955   2
  -2  -9 -24 13.9438 21.9814   2
  -2  -9 -25 137.106 31.5952   2
  -2  -9 -26 42.7581 22.7893   2
  -2 -10  18 53.9701 12.5805   1
  -2 -10  17 1.71804 7.40558   1
  -2 -10  16-1.63883 7.06413   1
  -2 -10  15 18.7276 8.37127   1
  -2 -10  14 147.030 20.5980   1
  -2 -10  13 50.8470 10.8607   1
  -2 -10  12 133.275 18.7430   1
  -2 -10  11 108.709 15.8188   1
  -2 -10  10 143.621 18.9570   1
  -2 -10   9 3.46879 5.46828   1
  -2 -10   8 70.3794 11.3851   1
  -2 -10   7-1.04591 5.40964   1
  -2 -10   6 90.7192 12.9926   1
  -2 -10   5 39.9344 8.20433   1
  -2 -10   4 112.264 14.7856   1
   2  10  -3 88.8586 19.2846   8
  -2 -10   3 133.639 15.4073   1
  -2 -10   3 128.028 25.0558   2
   2  10  -2 12.1507 9.71810   8
  -2 -10   2 6.45263 14.7142   2
  -2 -10   2-2.46429 3.87777   1
   2  10  -1 56.0108 13.5107   8
  -2 -10   1 37.0087 16.7982   2
  -2 -10   1 34.5770 7.08957   1
   2  10   0 37.7464 12.1867   8
  -2 -10   0 35.0761 17.1477   2
  -2 -10   0 33.8115 6.65338   1
   2  10   1 101.265 18.4404   8
  -2 -10  -1 95.0260 12.6590   1
   2  10   2-5.94662 9.04542   8
  -2 -10  -2 3.73074 14.0193   2
  -2 -10  -2 4.84624 3.83304   1
  -2 -10  -3 62.1382 20.0921   2
   2  10   3 45.6824 13.3442   8
  -2 -10  -4 47.6535 18.8894   2
   2  10   4 17.9183 10.2705   8
  -2 -10  -5 12.1854 17.1507   2
   2  10   5-2.02316 10.3164   8
  -2 -10  -6 4.15921 18.2930   2
   2  10   6-10.2017 10.2791   8
  -2 -10  -7 127.852 27.6522   2
   2  10   7 59.1431 15.9707   8
  -2 -10  -8 104.884 27.2757   2
   2  10   8 88.4386 18.0559   8
  -2 -10  -9 4.40166 19.7172   2
  -2 -10 -10-18.0787 19.5522   2
  -2 -10 -11 81.8800 26.5618   2
  -2 -10 -12-4.57832 18.0880   2
  -2 -10 -13-4.65989 17.9669   2
  -2 -10 -14-9.49044 20.4689   2
  -2 -10 -18 19.8045 22.6581   2
  -2 -10 -19 30.3778 22.0068   2
  -2 -10 -20 5.10341 21.5539   2
  -2 -10 -21-5.17644 21.4023   2
  -2 -10 -22-5.16020 21.3351   2
  -2 -10 -23-5.13969 21.2503   2
  -2 -11  15 16.7017 9.24016   1
  -2 -11  14 6.37376 7.91239   1
  -2 -11  13 22.7934 8.35617   1
  -2 -11  12 21.7405 7.97017   1
  -2 -11  11 8.28715 6.98545   1
  -2 -11  10 28.9922 8.25518   1
  -2 -11   9 30.1301 8.09224   1
  -2 -11   8-1.19559 5.04948   1
  -2 -11   7 4.56612 5.13055   1
  -2 -11   6 1.08822 5.30671   1
  -2 -11   5 19.7674 6.16993   1
  -2 -11   4 12.9645 5.70371   1
  -2 -11   3 94.6458 12.9484   1
  -2 -11   2 17.4359 5.87879   1
   2  11  -2-2.14622 10.0317   8
  -2 -11   1 6.18225 4.64718   1
  -2 -11   1 10.8877 15.9546   2
   2  11  -1-6.28750 10.3844   8
  -2 -11   0 3.78899 15.3192   2
   2  11   0-4.11269 10.0285   8
  -2 -11  -1 15.6273 14.2957   2
   2  11   1 2.03760 8.79657   8
  -2 -11  -2 56.4335 18.9148   2
   2  11   2 42.6486 13.3837   8
  -2 -11  -3 16.4675 17.0862   2
   2  11   3 16.1800 9.35102   8
  -2 -11  -4 107.462 25.0652   2
   2  11   4 66.8431 14.9155   8
  -2 -11  -5 26.3748 19.1069   2
  -2 -11  -6 166.462 33.4633   2
  -2 -11  -7 46.0812 23.5650   2
  -2 -11  -8 28.3320 20.1172   2
  -2 -11  -9 4.74205 19.1755   2
  -2 -11 -10 29.1962 22.7534   2
  -2 -11 -11 19.7716 24.1720   2
  -2 -11 -12 5.02128 19.8381   2
  -2 -11 -13 56.7655 26.1082   2
  -2 -11 -14 10.3719 21.9191   2
  -2 -11 -15 36.8529 22.0387   2
  -2 -11 -16 42.7167 24.2520   2
  -2 -11 -19 5.57788 21.5063   2
  -2 -12  12 29.1604 9.19736   1
  -2 -12  11-1.46511 6.91782   1
  -2 -12  10 23.8366 8.23892   1
  -2 -12   9 5.36955 6.14322   1
  -2 -12   8 5.14099 6.66419   1
  -2 -12   7 8.63146 5.58227   1
  -2 -12   6 26.0201 7.81837   1
  -2 -12   5 4.55078 5.64933   1
  -2 -12   4 10.9414 5.97936   1
  -2 -12  -1 49.9449 19.8867   2
  -2 -12  -2-4.24950 15.9699   2
  -2 -12  -3 17.5872 16.6018   2
  -2 -12  -4 18.3838 16.8956   2
  -2 -12  -5 47.0140 20.3427   2
  -2 -12  -6 57.7564 23.3682   2
  -2 -12  -7 39.4208 23.1727   2
  -2 -12  -8 60.5945 26.0158   2
  -2 -12  -9 82.8258 27.8919   2
  -2 -12 -10 25.9692 23.3899   2
  -2 -12 -11 15.9913 23.0210   2
  -2 -12 -12 27.0145 22.4783   2
  -2 -12 -13 21.8973 23.2072   2
  -2 -12 -14-5.62172 21.6753   2
  -2 -12 -15 34.2030 23.7837   2
  -2 -13   8-9.63730 7.74392   1
  -2 -13  -3 142.531 29.5391   2
  -2 -13  -4-9.53268 16.9619   2
  -2 -13  -5 4.87740 18.8055   2
  -2 -13  -6-5.05842 17.9823   2
  -2 -13  -7 15.5457 20.0275   2
  -2 -13  -8-5.31243 20.4828   2
  -2 -13  -9-21.5153 27.8899   2
  -2 -13 -10-5.51771 20.7360   2
   3 -12   0 9.41354 6.70970   1
   3 -12   1 37.3097 8.77527   1
   3 -12   2 19.4937 7.20522   1
   3 -12   3 40.6556 9.20219   1
   3 -12   4 11.2866 7.08563   1
   3 -12   5-5.11608 6.81267   1
   3 -12   6 11.7613 7.46904   1
   3 -11  -3 41.9930 8.83774   1
   3 -11  -2 72.7128 11.4291   1
   3 -11  -1 20.1264 6.73041   1
   3 -11   0 18.4355 6.16300   1
   3 -11   1-3.28792 5.59701   1
   3 -11   2 8.88481 6.18647   1
   3 -11   3 14.7098 6.24718   1
   3 -11   4 8.08165 6.10081   1
   3 -11   5 9.44867 5.55421   1
   3 -11   6 27.8458 7.62282   1
   3 -11   7-4.97194 5.78833   1
   3 -11   8 11.4962 6.60329   1
   3 -11   9 5.25094 5.67890   1
   3 -11  10 8.09704 6.52110   1
   3 -11  11 16.6956 7.16813   1
   3 -10 -18 29.2772 23.5789   2
   3 -10 -17-4.46305 21.7640   2
   3 -10 -16 91.4471 25.5408   2
   3 -10  -6 7.21347 4.96222   1
   3 -10  -5 32.8014 7.30786   1
   3 -10  -4 9.15797 5.12772   1
   3 -10  -3 15.7226 5.31615   1
   3 -10  -2 31.1307 7.09303   1
   3 -10  -1 0.97070 4.73359   1
   3 -10   0 20.6557 6.30467   1
   3 -10   1 40.8089 8.45903   1
   3 -10   2 6.08905 5.05753   1
   3 -10   3 28.9940 7.64806   1
   3 -10   4 6.36375 4.95943   1
   3 -10   5 3.26343 5.14456   1
   3 -10   6 23.4516 7.02743   1
   3 -10   7 4.58214 5.60193   1
   3 -10   8 3.53039 5.28085   1
   3 -10   9 42.3956 8.90421   1
   3 -10  10 7.48550 6.02858   1
   3 -10  11 50.1883 10.6561   1
   3 -10  12 46.4557 9.68964   1
   3 -10  13 12.3274 7.17846   1
   3 -10  14 53.7227 11.7114   1
   3 -10  15 1.45982 6.16545   1
   3  -9 -22 6.00375 24.8228   2
   3  -9 -21-5.28047 20.8621   2
   3  -9 -20 23.9972 21.2142   2
   3  -9 -19-4.25185 19.3955   2
   3  -9 -18-3.95759 14.8729   2
   3  -9  -8 5.56014 4.57147   1
   3  -9  -7 19.2077 5.47206   1
   3  -9  -6 29.1887 6.50298   1
   3  -9  -5 17.9777 5.26229   1
   3  -9  -4 25.5031 5.91393   1
   3  -9  -3-5.00784 4.14754   1
  -3   9   3-0.86549 4.73105   7
   3  -9  -2 5.12866 4.66879   1
  -3   9   2 12.5098 5.22690   7
   3  -9  -1 14.9215 5.47108   1
  -3   9   1 4.57238 4.99729   7
   3  -9   0 4.43595 4.92373   1
  -3   9   0 6.56847 4.94685   7
   3  -9   1 78.6898 11.2207   1
  -3   9  -1 69.9005 11.2093   7
   3  -9   2 0.92326 4.50685   1
  -3   9  -2 3.99701 4.87695   7
   3  -9   3 9.45792 4.74363   1
  -3   9  -3 6.12286 5.40336   7
  -3   9  -4 5.21921 5.62338   7
   3  -9   4 0.97036 4.50997   1
  -3   9  -5 49.3167 9.10983   7
   3  -9   5 35.8513 8.19189   1
  -3   9  -6-3.29313 5.09896   7
   3  -9   6-1.02094 4.98182   1
  -3   9  -7 4.51416 5.60266   7
   3  -9   7 4.19796 5.13331   1
  -3   9  -8 10.4229 6.10778   7
   3  -9   8 4.31844 5.46629   1
  -3   9  -9 3.56483 5.89232   7
   3  -9   9 3.33653 5.08268   1
  -3   9 -10 12.1973 6.45271   7
   3  -9  10 6.87244 5.56403   1
  -3   9 -11 1.25872 5.42437   7
   3  -9  11-1.18051 5.47925   1
  -3   9 -12 73.8327 12.6643   7
   3  -9  12 73.0747 12.2754   1
  -3   9 -13 130.616 18.5810   7
   3  -9  13 138.461 18.5543   1
  -3   9 -14 10.9754 7.50080   7
   3  -9  14 16.9145 7.55419   1
  -3   9 -15 7.02356 5.96685   7
   3  -9  15 6.71860 6.58368   1
  -3   9 -16 11.5080 7.31082   7
  -3   9 -17 1.47373 7.40775   7
   3  -9  18-4.43676 6.98253   1
  -3   9 -18 4.54509 6.78601   7
  -3   9 -19-1.56159 6.86445   7
  -3   9 -20 4.82430 7.47778   7
   3  -8 -25 30.2418 28.5474   2
   3  -8 -24-26.1940 27.7610   2
   3  -8 -23 83.6222 29.8937   2
   3  -8 -22 29.3454 19.9658   2
   3  -8 -21 48.7908 22.1123   2
   3  -8 -20 3.92158 18.2054   2
  -3   8  14 0.90666 4.62384   7
  -3   8  13 1.78282 4.61285   7
  -3   8  12-0.86611 4.02079   7
   3  -8 -11 13.5102 4.74355   1
  -3   8  11 8.51909 4.81628   7
   3  -8 -10 0.71254 4.12566   1
  -3   8  10 4.20184 4.10326   7
   3  -8  -9 2.14359 3.99119   1
  -3   8   9-2.49602 4.75673   7
   3  -8  -8-0.71328 3.88828   1
  -3   8   8 1.64277 4.30638   7
   3  -8  -7 2.14905 3.70500   1
  -3   8   7-0.82821 3.97486   7
   3  -8  -6 12.3155 4.72890   1
  -3   8   6 8.28820 4.39215   7
   3  -8  -5 5.12273 3.92304   1
  -3   8   5 14.8498 5.14348   7
   3  -8  -4 34.6191 6.84232   1
  -3   8   4 34.0729 6.81596   7
  -3   8   3 109.144 14.6012   7
   3  -8  -3 127.487 14.6683   1
   3  -8  -2 13.0983 4.84202   1
  -3   8   2 3.45230 4.20325   7
   3  -8  -1 115.914 14.2616   1
  -3   8   1 111.337 14.5643   7
   3  -8   0 0.80027 3.90260   1
  -3   8   0 0.89921 4.17436   7
   3  -8   1 77.6928 10.7896   1
  -3   8  -1 73.5902 11.2027   7
   3  -8   2 0.83741 4.28332   1
  -3   8  -2 7.46046 5.09467   7
  -3   8  -3 55.0319 10.0281   7
   3  -8   3 73.9691 10.1206   1
  -3   8  -4 112.240 14.9053   7
   3  -8   4 113.910 14.6088   1
  -3   8  -5 68.3431 10.6876   7
   3  -8   5 64.2625 10.3006   1
  -3   8  -6 9.10327 5.25127   7
   3  -8   6 1.86084 4.48901   1
  -3   8  -7 17.5936 5.81623   7
   3  -8   7 12.4421 5.71171   1
  -3   8  -8 14.8434 5.96771   7
   3  -8   8 16.7388 6.35467   1
  -3   8  -9 34.9515 8.15285   7
   3  -8   9 39.5070 8.06279   1
  -3   8 -10 7.86467 5.56841   7
   3  -8  10 13.5944 5.85718   1
  -3   8 -11 45.1001 9.13188   7
   3  -8  11 34.5154 8.52174   1
  -3   8 -12 11.8518 6.39406   7
   3  -8  12 21.1539 7.14705   1
  -3   8 -13 7.27473 6.04235   7
  -3   8 -14-1.24581 6.44356   7
  -3   8 -15 7.73532 5.92504   7
   3  -8  16-3.79665 6.72776   1
  -3   8 -16 13.3214 6.79638   7
   3  -8  17 9.13508 6.49973   1
  -3   8 -17 5.49439 7.03942   7
   3  -8  18 20.2193 8.29885   1
  -3   8 -18 29.7587 8.86160   7
   3  -8  19 11.1114 7.29516   1
  -3   8 -19-1.46245 7.57579   7
   3  -8  20 71.6695 12.6792   1
  -3   8 -20 60.3639 12.2604   7
   3  -8  21-4.42842 5.97745   1
  -3   8 -21 17.1126 7.35216   7
  -3   8 -22 14.4242 7.56273   7
   3  -7 -26 37.4639 32.4834   2
   3  -7 -25 13.2195 29.0752   2
   3  -7 -24 50.9264 27.5775   2
   3  -7 -23 11.8310 8.14432   7
   3  -7 -23 14.5500 18.7301   2
   3  -7 -22 4.35677 6.86789   7
   3  -7 -22 4.09917 16.1955   2
   3  -7 -21 25.7214 8.23069   7
   3  -7 -21 21.6840 16.0566   2
   3  -7 -20 49.4670 11.4753   7
   3  -7 -19 9.78436 6.66305   7
   3  -7 -18-2.78444 6.68616   7
   3  -7 -17 8.28454 7.28110   7
  -3   7  16 17.5906 6.18370   7
  -3   7  15 34.5687 7.48817   7
  -3   7  14 3.62358 4.69719   7
   3  -7 -13 116.578 13.4510   1
  -3   7  13 100.357 13.9187   7
  -3   7  12 2.58188 5.08941   7
   3  -7 -12 1.95900 3.60958   1
   3  -7 -11 198.118 21.2579   1
  -3   7  11 189.846 22.1289   7
  -3   7  10 1.66207 4.32142   7
   3  -7 -10 7.74153 4.07328   1
  -3   7   9 288.749 30.3925   7
   3  -7  -9 280.479 29.5799   1
   3  -7  -8 1.28322 3.45501   1
  -3   7   8 0.80608 4.05236   7
   3  -7  -7 28.1524 5.75218   1
  -3   7   7 33.1382 6.63788   7
   3  -7  -6 8.39461 4.01804   1
  -3   7   6 4.00941 4.07281   7
   3  -7  -5-0.65357 3.29597   1
  -3   7   5 9.59609 4.52783   7
   3  -7  -4 61.8241 8.86345   1
  -3   7   4 63.8524 9.41571   7
   3  -7  -3 118.506 13.0356   1
  -3   7   3 89.9038 13.0923   7
  -3   7   2 4.90990 4.58110   7
   3  -7  -2 17.2251 4.60323   1
  -3   7   1 520.787 52.7119   7
   3  -7  -1 520.701 52.2444   1
   3  -7   0 2.87179 3.55468   1
  -3   7   0-2.53270 4.71563   7
   3  -7   1 12.4951 4.58369   1
  -3   7  -1 16.1827 5.50529   7
  -3   7  -2 12.0200 4.77300   7
   3  -7   2 2.26596 3.83923   1
  -3   7  -3 0.86968 4.50453   7
   3  -7   3 4.66212 3.85548   1
  -3   7  -4 3.54063 4.18738   7
   3  -7   4 2.39030 3.51209   1
   3  -7   5 184.345 21.3859   1
  -3   7  -5 196.286 21.9091   7
  -3   7  -6 38.5414 8.37657   7
   3  -7   6 58.9796 8.72479   1
  -3   7  -7-0.94102 4.67186   7
   3  -7   7 9.53076 5.29167   1
   3  -7   8 343.344 35.9396   1
  -3   7  -8 335.458 36.1789   7
  -3   7  -9 8.94417 5.53397   7
   3  -7   9 15.6394 6.09213   1
  -3   7 -10 542.238 54.1057   7
   3  -7  10 510.311 53.6295   1
  -3   7 -11 5.19923 5.17187   7
  -3   7 -12 1.07502 5.24231   7
  -3   7 -13 35.5840 8.03719   7
  -3   7 -14-1.14992 5.44191   7
   3  -7  14-5.38644 5.73637   1
  -3   7 -15 14.2884 6.25550   7
   3  -7  15 17.7761 6.59784   1
  -3   7 -16 34.5564 8.44633   7
   3  -7  16 29.7772 7.73156   1
  -3   7 -17 30.6939 9.12714   7
   3  -7  17 46.0244 9.61733   1
  -3   7 -18 35.7504 9.22408   7
   3  -7  18 34.0503 8.63513   1
  -3   7 -19 34.2874 9.03173   7
   3  -7  19 42.5741 9.29968   1
  -3   7 -20 53.9439 10.9906   7
   3  -7  20 46.3964 9.73596   1
  -3   7 -21 11.7435 7.74568   7
   3  -7  21 21.2127 8.06502   1
  -3   7 -22 6.06863 7.16912   7
   3  -7  22 1.36375 6.11574   1
  -3   7 -23 14.0985 8.29636   7
   3  -7  23 11.2104 7.13987   1
  -3   7 -24 6.45644 6.82943   7
   3  -7  24 2.87830 6.69402   1
   3  -6 -29 91.4327 15.3392   7
   3  -6 -28 10.8272 7.72633   7
   3  -6 -27-3.04835 6.57466   7
   3  -6 -26-1.52013 7.05700   7
   3  -6 -25 74.4221 29.2359   2
   3  -6 -25 52.1931 12.0025   7
   3  -6 -24-9.72597 22.1797   2
   3  -6 -24-1.51146 6.64650   7
   3  -6 -23 28.4002 17.5127   2
   3  -6 -23 7.32417 7.53584   7
   3  -6 -22 17.7097 17.5931   2
   3  -6 -22 14.2858 8.19573   7
   3  -6 -21 70.8610 20.1911   2
   3  -6 -21 95.4889 14.7369   7
   3  -6 -20 17.9441 7.98360   7
   3  -6 -19-2.72804 6.95993   7
   3  -6 -18-6.76077 7.66877   7
   3  -6 -17 4.02472 6.23842   7
   3  -6 -15 25.6978 5.74727   1
  -3   6  15 24.2038 6.55397   7
   3  -6 -14 242.663 27.0553   1
  -3   6  14 286.643 28.7006   7
   3  -6 -13 61.9720 9.14950   1
  -3   6  13 78.1822 10.5091   7
   3  -6 -12 34.6055 5.96938   1
  -3   6  12 31.3368 6.86990   7
   3  -6 -11 5.93537 3.66020   1
  -3   6  11-1.64605 4.37854   7
  -3   6  10 382.273 38.9930   7
   3  -6 -10 371.290 38.0228   1
  -3   6   9 147.647 17.9113   7
   3  -6  -9 160.276 17.2339   1
  -3   6   8 3.88273 4.03049   7
   3  -6  -8 3.46951 3.36094   1
  -3   6   7-0.77723 3.79268   7
   3  -6  -7 3.44333 3.24729   1
   3  -6  -6 106.839 13.1814   1
  -3   6   6 124.253 14.3788   7
   3  -6  -5 216.880 22.3719   1
  -3   6   5 200.001 22.8998   7
   3  -6  -4 94.7983 11.4895   1
  -3   6   4 93.8044 12.1676   7
   3  -6  -3 1.77663 2.97624   1
  -3   6   3-2.29587 4.52196   7
  -3   6   2 160.907 18.1040   7
   3  -6  -2 152.475 17.3501   1
  -3   6   1 497.467 49.6011   7
   3  -6  -1 483.516 48.9418   1
   3  -6   0 38.3710 6.60499   1
  -3   6   0 43.6527 7.28913   7
   3  -6   1 67.5726 9.25560   1
  -3   6  -1 60.4592 9.40856   7
  -3   6  -2 159.305 18.5356   7
   3  -6   2 161.542 18.0749   1
   3  -6   3 48.0140 7.23116   1
  -3   6  -3 35.4904 7.25019   7
   3  -6   4 1.42979 3.86324   1
  -3   6  -4 7.17741 4.36074   7
   3  -6   5 54.4404 8.63451   1
  -3   6  -5 56.6383 8.94639   7
   3  -6   6 50.7288 7.89589   1
  -3   6  -6 40.5832 7.69725   7
   3  -6   7 7.01006 4.41922   1
  -3   6  -7 1.69745 4.02536   7
   3  -6   8 48.1968 7.93527   1
  -3   6  -8 38.1758 7.64291   7
  -3   6  -9 26.5466 6.94120   7
  -3   6 -10 460.265 47.3965   7
  -3   6 -11 74.8003 11.1925   7
   3  -6  12 228.332 26.1780   1
  -3   6 -12 247.394 26.7459   7
   3  -6  13 58.1360 9.57765   1
  -3   6 -13 65.2729 10.3070   7
   3  -6  14 41.5390 8.67875   1
  -3   6 -14 62.5706 9.80602   7
   3  -6  15-0.99448 4.77229   1
  -3   6 -15 1.10312 5.29365   7
   3  -6  16 27.6558 7.17618   1
  -3   6 -16 28.7021 7.80554   7
   3  -6  17 1.05449 4.98205   1
  -3   6 -17 3.58410 5.82831   7
   3  -6  18 21.7002 6.75994   1
  -3   6 -18 33.5425 7.83418   7
   3  -6  19-1.11619 5.18750   1
  -3   6 -19 9.02728 6.29322   7
   3  -6  20-2.29637 5.24171   1
  -3   6 -20-2.67239 7.19586   7
   3  -6  21 14.1723 6.64870   1
  -3   6 -21 2.76611 6.99998   7
   3  -6  22 42.4884 9.58337   1
  -3   6 -22 42.9491 10.0022   7
   3  -6  23 41.1469 9.09383   1
  -3   6 -23 32.5363 9.41344   7
   3  -6  24 2.56175 5.54533   1
  -3   6 -24 12.2140 8.12904   7
   3  -6  25 78.9275 12.8551   1
  -3   6 -25 70.8455 14.1416   7
   3  -6  26-1.35039 7.36218   1
   3  -5 -29 11.1843 7.23327   7
   3  -5 -28 12.3533 8.39312   7
   3  -5 -27 21.0068 8.21583   7
   3  -5 -26 44.3195 10.5637   7
   3  -5 -25 62.9113 12.5983   7
   3  -5 -24 18.0503 7.73481   7
   3  -5 -24 13.0200 18.3981   2
   3  -5 -23 14.3654 7.66159   7
   3  -5 -23 18.0576 18.7293   2
   3  -5 -22 13.9151 7.13712   7
   3  -5 -22 21.3331 16.2546   2
   3  -5 -21 6.82386 6.88912   7
   3  -5 -20 21.3300 8.04965   7
   3  -5 -19 2.62455 6.19990   7
   3  -5 -18 33.5928 9.05607   7
   3  -5 -17 12.8295 7.50233   7
   3  -5 -17 11.5701 4.45473   1
   3  -5 -16 181.531 19.9327   1
  -3   5  15 32.9461 6.75668   7
   3  -5 -15 13.2580 4.72176   1
  -3   5  14 146.316 18.0444   7
   3  -5 -14 155.056 17.0342   1
  -3   5  13 15.1512 5.00079   7
   3  -5 -13 6.44129 3.67873   1
  -3   5  12 136.232 16.4363   7
   3  -5 -12 135.668 15.3333   1
  -3   5  11 163.394 17.6081   7
   3  -5 -11 137.937 16.2268   1
  -3   5  10 24.7870 5.67454   7
   3  -5 -10 16.1041 4.21729   1
  -3   5   9 3.03172 3.92432   7
   3  -5  -9 1.58166 2.73334   1
  -3   5   8 89.5168 11.8386   7
   3  -5  -8 92.7244 10.9659   1
  -3   5   7 9.57250 4.30260   7
   3  -5  -7 5.17247 2.98888   1
  -3   5   6 177.525 20.1741   7
   3  -5  -6 182.911 19.2692   1
  -3   5   5 25.8119 5.69634   7
   3  -5  -5 23.6171 4.60377   1
   3  -5  -4 212.772 22.1091   8
   3  -5  -4 227.761 23.4190   1
  -3   5   4 265.392 24.7064   7
  -3   5   3 136.120 15.4277   7
   3  -5  -3 121.201 14.3922   1
   3  -5  -3 137.229 16.9046   8
  -3   5   2 60.6910 9.03682   7
   3  -5  -2 55.1472 9.56253   8
   3  -5  -2 72.0684 8.66672   1
  -3   5   1 40.4753 6.92065   7
   3  -5  -1 36.5059 7.60033   8
   3  -5  -1 40.0370 6.21427   1
   3  -5   0 133.051 14.5734   1
   3  -5   0 108.270 15.0072   8
  -3   5   0 141.181 15.4361   7
  -3   5  -1 136.019 15.9159   7
   3  -5   1 136.775 15.4034   1
  -3   5  -2 3.50012 3.52860   7
   3  -5   2 2.39114 3.14581   1
  -3   5  -3 28.1795 5.70006   7
   3  -5   3 14.1972 4.54210   1
  -3   5  -4 246.544 26.7177   7
   3  -5   4 255.391 26.5019   1
  -3   5  -5 239.061 25.4003   7
   3  -5   5 233.092 25.0534   1
   3  -5   6 78.8246 11.0353   1
  -3   5  -6 98.4137 11.7527   7
  -3   5  -7 83.3725 11.1051   7
  -3   5  -8 2.31125 3.64351   7
  -3   5  -9 120.532 14.7617   7
  -3   5 -10 122.465 14.0313   7
   3  -5  10 97.6345 13.3068   1
   3  -5  11 45.6200 7.67128   1
  -3   5 -11 40.5020 7.64804   7
   3  -5  12 39.6926 7.43628   1
  -3   5 -12 40.4552 7.50859   7
  -3   5 -13 376.900 37.8343   7
   3  -5  13 340.214 37.1529   1
  -3   5 -14 195.457 21.4009   7
   3  -5  14 166.424 20.3721   1
  -3   5 -15 92.3137 13.3427   7
   3  -5  15 100.580 13.0461   1
   3  -5  16 2.72762 4.75748   1
  -3   5 -16 16.0389 6.15600   7
   3  -5  17-0.93685 4.42940   1
  -3   5 -17 8.89987 5.51354   7
   3  -5  18 0.96437 4.64124   1
  -3   5 -18 8.09643 5.82351   7
   3  -5  19-2.97463 4.44313   1
  -3   5 -19 1.20100 5.76528   7
   3  -5  20 7.14575 4.97303   1
  -3   5 -20 12.4655 6.59116   7
   3  -5  21 39.8904 8.03350   1
  -3   5 -21 28.3867 8.20979   7
   3  -5  22 17.2618 6.35100   1
  -3   5 -22 21.3420 8.07933   7
   3  -5  23 5.54641 5.40933   1
  -3   5 -23-4.14119 6.29636   7
   3  -5  24-2.27706 6.05186   1
  -3   5 -24-1.42577 6.26864   7
   3  -5  25 49.1289 9.41379   1
  -3   5 -25 38.2944 10.1429   7
   3  -5  26 2.40120 5.76456   1
  -3   5 -26 1.51995 6.42063   7
   3  -5  27 9.86218 5.66160   1
  -3   5 -27 3.13538 6.65280   7
   3  -5  28-3.79063 5.77376   1
   3  -4 -30 6.73767 7.28681   7
   3  -4 -29 7.96223 7.42944   7
   3  -4 -28-4.59439 6.99802   7
   3  -4 -27 7.35769 6.86535   7
   3  -4 -26 4.31444 6.45366   7
   3  -4 -25 4.24140 6.68625   7
   3  -4 -24 52.0020 11.4510   7
   3  -4 -23 9.89353 14.4954   2
   3  -4 -23 1.41066 6.08410   7
   3  -4 -22 8.05758 11.5887   2
   3  -4 -22 5.41484 6.52130   7
   3  -4 -21-5.22604 7.22725   7
   3  -4 -20 31.9355 8.49417   7
   3  -4 -19-4.98715 5.60362   7
   3  -4 -18 46.5158 10.0852   7
   3  -4 -17 10.8452 6.14220   7
   3  -4 -16 65.5712 8.94982   1
   3  -4 -16 64.2846 11.2420   7
   3  -4 -15 66.6709 8.98162   1
  -3   4  14 163.652 19.2533   7
   3  -4 -14 168.204 18.2722   1
  -3   4  13 32.4015 6.85715   7
   3  -4 -13 41.5762 6.56745   1
  -3   4  12 159.071 17.4558   7
   3  -4 -12 139.066 16.1515   1
  -3   4  11 15.8269 4.67232   7
   3  -4 -11 8.79594 3.61766   1
  -3   4  10 43.0591 7.21497   7
   3  -4 -10 44.5306 6.52142   1
  -3   4   9 120.219 13.5930   7
   3  -4  -9 103.564 12.3882   1
  -3   4   8 281.004 30.4288   7
   3  -4  -8 299.188 29.6369   1
  -3   4   7 29.3428 5.96022   7
   3  -4  -7 35.4427 5.50092   1
  -3   4   6 148.815 16.3864   7
   3  -4  -6 135.634 15.2445   1
  -3   4   5 71.6660 9.07672   7
   3  -4  -5 57.3963 7.96177   1
   3  -4  -4 89.3562 10.9742   1
  -3   4   4 104.459 12.1005   7
  -3   4   3 66.9445 8.81328   7
   3  -4  -3 53.4312 8.52894   8
   3  -4  -3 64.0100 8.10681   1
  -3   4   2 10.9197 4.75056   7
   3  -4  -2 22.7013 4.69487   8
   3  -4  -2 17.6252 4.02859   1
   3  -4  -1 197.830 19.6112   1
   3  -4  -1 167.162 19.4565   8
  -3   4   1 194.061 20.4308   7
   3  -4   0 140.710 15.1820   1
  -3   4   0 130.787 15.6132   7
   3  -4   0 139.696 15.3676   8
   3  -4   1-0.54503 3.58106   8
   3  -4   1 3.03170 3.20414   1
  -3   4  -1 2.50607 3.70534   7
  -3   4  -2 174.578 18.5055   7
   3  -4   2 160.073 17.9571   1
  -3   4  -3 167.715 18.6521   7
   3  -4   3 169.698 18.3419   1
  -3   4  -4 245.007 25.8808   7
  -3   4  -5 107.057 12.9533   7
  -3   4  -6 54.5287 8.06744   7
  -3   4  -7 14.6533 4.65754   7
  -3   4  -8 91.6096 11.0724   7
   3  -4   8 79.0221 10.7476   1
  -3   4  -9 25.1171 5.47729   7
   3  -4   9 22.8358 5.42986   1
  -3   4 -10 12.0040 4.51329   7
   3  -4  10 18.1970 4.85461   1
  -3   4 -11 36.2232 6.72173   7
   3  -4  11 41.6265 7.11217   1
  -3   4 -12 32.2328 6.66509   7
   3  -4  12 34.2674 6.37068   1
   3  -4  13 170.222 19.9003   1
  -3   4 -13 188.720 20.6362   7
   3  -4  14 290.709 31.7476   1
  -3   4 -14 319.300 32.5779   7
   3  -4  15 43.6296 7.68953   1
  -3   4 -15 36.8532 7.71976   7
   3  -4  16 43.3045 7.89644   1
  -3   4 -16 54.0847 9.06038   7
   3  -4  17 4.12942 4.40518   1
  -3   4 -17 4.09873 5.23933   7
   3  -4  18 86.7364 11.7603   1
  -3   4 -18 83.0568 12.4434   7
   3  -4  19 27.9873 6.24313   1
  -3   4 -19 17.7051 6.83559   7
   3  -4  20 76.5473 11.0981   1
  -3   4 -20 78.1447 12.3834   7
   3  -4  21 51.8758 8.80758   1
  -3   4 -21 50.0491 10.2795   7
   3  -4  22 22.8664 6.05268   1
  -3   4 -22 16.0723 7.08139   7
   3  -4  23 0.97874 4.92360   1
  -3   4 -23 3.84009 5.29546   7
   3  -4  24-4.02733 5.13390   1
  -3   4 -24 10.6046 6.46298   7
   3  -4  25-4.14163 4.72365   1
  -3   4 -25 6.85666 6.68709   7
   3  -4  26-1.06362 5.50736   1
  -3   4 -26-5.67112 7.63624   7
   3  -4  27 1.09227 4.80716   1
  -3   4 -27 5.85809 6.68416   7
   3  -4  28 26.9261 7.52913   1
  -3   4 -28 30.2303 9.04471   7
   3  -3 -30 80.8259 14.7504   7
   3  -3 -29 1.60842 7.59451   7
   3  -3 -28-4.54705 6.27977   7
   3  -3 -27 39.2328 10.0794   7
   3  -3 -26-2.77677 6.10730   7
   3  -3 -25-4.06558 7.11521   7
   3  -3 -24 10.7135 6.50580   7
   3  -3 -23-1.35307 6.06106   7
   3  -3 -22 7.48668 10.9678   2
   3  -3 -22-1.31611 6.31628   7
   3  -3 -21 337.774 34.0761   2
   3  -3 -21 208.974 27.8147   7
   3  -3 -20 2.42108 5.71925   7
   3  -3 -19 326.654 35.9254   7
   3  -3 -18 5.73458 5.78942   7
   3  -3 -17 88.6418 13.4387   7
   3  -3 -16 11.0030 5.86155   7
   3  -3 -15 6.49833 5.39747   7
   3  -3 -14 23.9421 4.91879   1
  -3   3  13 54.4892 8.53560   7
   3  -3 -13 54.4047 7.76753   1
  -3   3  12 220.502 21.9265   7
   3  -3 -12 181.141 20.5912   1
  -3   3  11 5.58777 2.54162   8
   3  -3 -11 10.9230 3.56221   1
  -3   3  11 12.8050 4.57210   7
  -3   3  10 0.95037 2.33761   8
   3  -3 -10 2.38371 2.97229   1
  -3   3  10 6.12135 3.52509   7
   3  -3  -9 12.7346 3.49877   1
  -3   3   9 3.29616 3.44420   7
   3  -3  -8 150.401 16.3642   1
  -3   3   8 155.126 17.1593   7
  -3   3   7 1.24186 3.42984   7
   3  -3  -7 1.70747 2.65701   1
  -3   3   6 105.031 13.7354   7
   3  -3  -6 133.108 13.3979   1
  -3   3   5 451.254 43.8622   7
   3  -3  -5 427.123 42.9607   1
  -3   3   4 204.672 19.2800   7
   3  -3  -4 155.186 17.9155   1
  -3   3   3 307.124 29.8461   7
   3  -3  -3 275.991 28.8801   1
  -3   3   2 47.3943 6.93207   7
   3  -3  -2 36.4960 5.13484   8
   3  -3  -2 47.0118 6.10401   1
  -3   3   1 664.934 63.2500   7
   3  -3  -1 627.721 62.4255   1
  -3   3   0 12.9147 4.39374   7
   3  -3   0 7.56627 3.32265   1
   3  -3   1 561.649 53.0604   1
  -3   3  -1 517.411 53.3671   7
  -3   3  -2 636.403 62.4300   7
  -3   3  -3 487.560 48.3787   7
  -3   3  -4 88.9737 10.8084   7
  -3   3  -5 111.649 13.0543   7
   3  -3   5 112.498 12.9361   1
  -3   3  -6 166.941 18.6833   7
   3  -3   6 178.522 18.6557   1
  -3   3  -7 229.277 23.0271   7
   3  -3   7 204.466 22.6670   1
  -3   3  -8 6.76910 3.61472   7
   3  -3   8 11.0021 3.79492   1
  -3   3  -9 224.289 24.5318   7
   3  -3   9 238.525 24.3944   1
   3  -3  10 43.4777 6.68307   1
  -3   3 -10 42.9619 6.98851   7
   3  -3  11 24.1988 5.09194   1
  -3   3 -11 30.1124 5.81775   7
   3  -3  12 347.682 37.7810   1
  -3   3 -12 411.086 38.7706   7
   3  -3  13 41.0743 7.04359   1
  -3   3 -13 52.7940 8.08045   7
   3  -3  14 8.59321 3.89762   1
  -3   3 -14 12.3578 4.75294   7
   3  -3  15 212.625 24.0687   1
  -3   3 -15 245.439 25.2943   7
   3  -3  16 160.723 19.1113   1
  -3   3 -16 191.581 20.4454   7
  -3   3 -17 2.81765 4.76097   7
   3  -3  17 9.39445 4.13136   1
  -3   3 -18 80.3396 12.0607   7
   3  -3  18 85.5018 11.1372   1
   3  -3  19 16.8439 5.27186   1
   3  -3  20 160.804 18.6282   1
   3  -3  21 4.05793 4.54947   1
   3  -3  22 70.1919 10.3598   1
   3  -3  23 135.989 16.6772   1
   3  -3  24 9.74670 5.14887   1
   3  -3  25-0.91250 4.51878   1
   3  -3  26 12.2109 5.43281   1
   3  -3  27 0.96641 4.40845   1
  -3   3 -29 13.2037 7.37024   7
   3  -2 -30 6.21915 7.72045   7
   3  -2 -29 109.886 17.1197   7
   3  -2 -28 6.02016 7.24477   7
   3  -2 -27 122.801 17.7496   7
   3  -2 -26 72.3509 12.7159   7
   3  -2 -25-5.21041 6.56490   7
   3  -2 -24 5.03997 5.86753   7
   3  -2 -23 39.5269 8.79988   7
   3  -2 -22 12.3303 6.73837   7
   3  -2 -21 150.754 20.7308   7
   3  -2 -21 209.208 26.0097   2
   3  -2 -20 86.8813 13.1585   7
   3  -2 -19 395.149 42.0514   7
   3  -2 -18 9.69179 5.64372   7
   3  -2 -17 7.28369 5.42480   7
   3  -2 -16 132.665 16.9366   7
   3  -2 -15 168.944 20.2026   7
   3  -2 -14 9.69359 5.36293   7
  -3   2  13 157.566 18.5422   8
   3  -2 -13 195.064 18.9767   1
  -3   2  12 40.3517 6.58804   7
  -3   2  12 24.7475 5.22254   8
   3  -2 -12 41.7218 5.74120   1
  -3   2  11 256.294 23.0759   7
   3  -2 -11 239.188 22.2251   1
   3  -2 -10 9.23853 3.03408   1
  -3   2  10 1.95043 3.17025   8
  -3   2  10 7.01122 3.76982   7
  -3   2   9 174.943 17.0605   7
   3  -2  -9 161.620 16.0272   1
  -3   2   9 123.756 15.5608   8
   3  -2  -8 26.7820 4.75711   1
  -3   2   8 24.8045 5.05141   8
  -3   2   8 29.1443 5.71119   7
  -3   2   7 144.793 16.4953   7
  -3   2   7 142.847 15.9597   8
   3  -2  -7 154.549 15.8347   1
  -3   2   6 134.684 14.4521   7
   3  -2  -6 120.364 13.5450   1
  -3   2   5 24.2134 4.81045   7
   3  -2  -5 11.9015 3.54314   1
  -3   2   4 227.525 23.2612   7
   3  -2  -4 217.768 22.4967   1
  -3   2   3 2.05932 3.18907   7
   3  -2  -3 4.97889 2.64335   1
   3  -2  -2 207.300 21.5791   1
  -3   2   2 219.793 22.3555   7
  -3   2   1 53.5475 7.29955   7
   3  -2  -1 48.8115 6.52346   1
  -3   2   0 190.031 20.0986   7
  -3   2  -1 5.32080 3.39862   7
  -3   2  -2 104.871 12.0516   7
   3  -2   3 4.27058 3.12660   1
  -3   2  -3 6.63895 3.33417   7
   3  -2   4 877.483 82.7394   1
  -3   2  -4 833.359 82.9795   7
   3  -2   5 106.884 11.7173   1
  -3   2  -5 98.6563 11.9142   7
   3  -2   6 199.074 20.7278   1
   3  -2   7 11.3336 3.48433   1
   3  -2   8 206.127 21.5114   1
   3  -2   9 6.82448 3.20956   1
   3  -2  10 27.2635 5.11354   1
   3  -2  11 73.9152 9.32102   1
   3  -2  12 33.8173 5.60477   1
   3  -2  13 301.240 30.8025   1
   3  -2  14 27.9992 5.37007   1
   3  -2  15 525.733 52.1842   1
   3  -2  16 44.3480 6.88949   1
   3  -2  17 2.50430 3.50505   1
   3  -2  18 0.64558 3.47484   1
  -3   2 -18-0.89919 4.77745   7
   3  -2  19 40.6049 7.37199   1
  -3   2 -19 65.7356 9.61808   7
   3  -2  20 72.0513 10.0848   1
  -3   2 -20 82.2862 11.4060   7
   3  -2  21 31.8469 6.12649   1
  -3   2 -21 27.5427 7.38392   7
   3  -2  22-0.73001 3.61716   1
  -3   2 -22-3.18427 4.84290   7
   3  -2  23 23.3509 5.16939   1
  -3   2 -23 9.93331 5.70612   7
   3  -2  24 11.6550 4.79143   1
  -3   2 -24 35.5423 7.95732   7
   3  -2  25 0.80204 3.72720   1
  -3   2 -25 4.76184 5.80712   7
   3  -2  26 23.1713 6.15037   1
  -3   2 -26 29.6429 8.11410   7
  -3   2 -27 44.8347 9.98203   7
  -3   2 -28 63.7048 11.7060   7
  -3   2 -29 1.37466 5.92544   7
  -3   2 -30 5.69155 7.17113   7
   3  -1 -30-3.00541 6.98045   7
   3  -1 -29 14.6162 7.57985   7
   3  -1 -28 4.29922 6.31115   7
   3  -1 -27 86.9398 14.5663   7
   3  -1 -26 29.9636 8.45064   7
   3  -1 -25 24.3659 7.76422   7
   3  -1 -24 138.938 18.4667   7
   3  -1 -23-3.50011 5.60853   7
   3  -1 -22 7.93161 6.06667   7
   3  -1 -21 1.10950 5.41046   7
   3  -1 -20 47.6647 9.54512   7
   3  -1 -19 76.7204 11.6308   7
   3  -1 -18 11.2021 5.22640   7
   3  -1 -17 167.048 19.8266   7
   3  -1 -16 7.49438 4.69206   7
   3  -1 -15 34.3278 7.06670   7
   3  -1 -14 73.5431 10.5889   7
   3  -1 -13 2.55322 4.02496   7
   3  -1 -12 1.65749 4.10625   7
  -3   1  11 2.84858 3.78541   8
  -3   1  11 3.86938 3.44147   7
  -3   1  10 5.37115 3.57036   7
  -3   1  10 2.17105 3.74878   8
   3  -1 -10 0.45611 2.84322   1
  -3   1   9 2.24869 3.25476   7
   3  -1  -9 4.27200 2.95048   1
  -3   1   9-2.68411 3.70534   8
   3  -1  -8 16.7588 3.95785   1
  -3   1   8 18.0705 5.48235   8
  -3   1   8 19.7604 4.81884   7
  -3   1   7 165.250 17.5549   7
  -3   1   7 144.789 17.9344   8
   3  -1  -7 167.611 16.9885   1
  -3   1   6 29.2274 7.87549   8
   3  -1  -6 21.3232 4.20665   1
   3  -1  -5 228.380 21.6356   1
   3  -1  -5 223.031 21.4276   8
  -3   1   5 171.366 22.1258   8
   3  -1  -4 33.1027 5.45355   1
   3  -1  -4 37.6192 6.14869   8
  -3   1   4 44.1570 4.59229   8
   3  -1  -3 335.711 33.7491   1
   3  -1  -3 357.668 35.3966   8
   3  -1  -2 348.362 34.2723   8
   3  -1  -1 47.2258 5.25277   8
   3  -1   1 84.2687 9.40444   1
   3  -1   2 127.653 13.4528   1
   3  -1   3 40.4664 5.45183   1
   3  -1   4 332.207 32.8086   1
   3  -1   5 90.7677 10.2212   1
   3  -1   6 581.074 55.2565   1
  -3   1  -6 553.169 55.4671   7
  -3   1  -7 59.4046 7.56777   7
   3  -1   7 51.5723 6.96048   1
   3  -1   8 9.80526 3.38002   1
  -3   1  -8 3.40310 2.96102   7
   3  -1   9 1.63314 2.64949   1
  -3   1  -9 11.3609 3.75182   7
   3  -1  10 123.839 13.3890   1
  -3   1 -10 118.329 13.8592   7
   3  -1  11 54.6279 7.52513   1
  -3   1 -11 68.0609 8.44205   7
   3  -1  12 62.7706 8.48833   1
  -3   1 -12 78.8139 9.36037   7
   3  -1  13 1.88538 2.90141   1
  -3   1 -13-1.29228 3.43316   7
   3  -1  14 530.391 53.8387   1
  -3   1 -14 575.314 54.8257   7
   3  -1  15 67.5306 9.26028   1
  -3   1 -15 93.0901 10.7425   7
   3  -1  16 146.338 16.0789   1
  -3   1 -16 146.721 17.0121   7
   3  -1  17 159.842 18.1498   1
  -3   1 -17 184.001 19.5669   7
  -3   1 -18 180.624 20.5599   7
   3  -1  19-2.87819 3.29143   1
  -3   1 -19 5.20565 4.29602   7
   3  -1  20 10.1137 3.85049   1
  -3   1 -20 13.5958 5.05623   7
  -3   1 -21 139.073 17.8164   7
   3  -1  21 155.640 16.8370   1
   3  -1  22 99.2773 13.0441   1
  -3   1 -22 133.145 15.1673   7
  -3   1 -23 12.3311 5.89440   7
   3  -1  23 2.63368 3.43849   1
  -3   1 -24 63.1122 10.4174   7
   3  -1  24 55.7387 8.39514   1
  -3   1 -25 8.90022 6.27093   7
  -3   1 -26 53.2131 9.89350   7
  -3   1 -27 9.60478 6.01334   7
  -3   1 -28 1.24765 5.37795   7
  -3   1 -29 28.4483 8.69209   7
  -3   1 -30 16.0961 6.81335   7
  -3   1 -31 4.17405 6.46987   7
   3   0 -30 10.3020 7.56726   7
   3   0 -29 1.41918 6.47383   7
   3   0 -28 8.22262 6.18655   7
   3   0 -27 36.0217 9.60494   7
   3   0 -26-2.60296 5.61404   7
   3   0 -25 2.55034 6.12402   7
   3   0 -24 38.8012 8.88758   7
   3   0 -23-1.14453 4.30121   7
   3   0 -22 29.3802 7.43067   7
  -3   0   9 128.326 15.3725   8
   3   0  -8 145.763 15.0801   1
  -3   0   8 127.667 16.4502   8
   3   0  -7 4.62477 2.72430   1
  -3   0   7 1.52443 5.77675   8
   3   0  -6 201.656 21.6746   8
  -3   0   6 199.193 23.4232   8
  -3   0   6 201.204 21.0144   7
   3   0  -6 205.535 20.7385   1
   3   0  -5 176.249 18.1471   8
  -3   0   5 160.028 17.0407   7
   3   0  -5 149.682 16.7289   1
  -3   0   5 191.997 21.8216   8
   3   0  -4 459.992 41.6528   8
  -3   0   4 362.925 42.8354   8
  -3   0   4 395.035 40.1460   7
  -3   0   3 204.409 22.1513   8
   3   0  -3 230.480 24.7333   8
  -3   0   3 204.615 21.8213   7
   3   0  -3 226.336 22.0646   7
   3   0  -2 1438.61 154.345   8
  -3   0   2 1702.87 151.466   8
  -3   0   2 1490.98 152.032   7
   3   0  -2 1568.06 152.173   7
   3   0  -1 246.896 24.2404   7
  -3   0   1 253.303 24.2901   7
   3   0  -1 229.679 24.3865   8
  -3   0   1 238.881 23.4271   8
  -3   0   1 229.200 23.6518   1
   3   0  -1 239.567 23.7847   1
   3   0   0 263.524 26.4133   7
  -3   0   0 254.948 26.4153   7
   3   0   0 277.609 25.7857   8
   3   0   0 259.490 25.9566   1
  -3   0   0 253.503 25.9174   1
   3   0   1 224.209 21.5296   7
  -3   0  -1 216.443 21.6004   7
   3   0   1 206.690 21.0787   1
  -3   0  -1 200.698 21.0282   1
   3   0   1 214.357 20.9624   8
   3   0   2 206.026 21.2454   7
   3   0   2 207.740 20.8891   1
  -3   0  -2 200.379 21.3196   7
  -3   0  -2 221.008 20.9365   1
   3   0   3 80.3228 9.37295   7
  -3   0  -3 88.9903 9.10607   1
  -3   0  -3 87.0694 9.62556   7
   3   0   3 78.5127 9.00208   1
   3   0   4 20.1851 5.48426   2
   3   0   4 17.8072 3.32254   1
  -3   0  -4 18.9141 3.33244   1
  -3   0  -4 22.4903 4.00304   7
   3   0   4 19.8619 3.90798   7
   3   0   5 2.62424 4.69799   2
  -3   0  -5 15.4973 3.46801   7
   3   0   5 14.0439 3.08321   7
   3   0   5 11.0216 2.79036   1
  -3   0  -5 7.22707 2.49560   1
  -3   0  -6 93.5679 10.5717   1
   3   0   6 104.766 10.8384   1
  -3   0  -6 104.731 11.2112   7
  -3   0  -7 0.27055 1.98359   1
   3   0   7 0.89385 2.42669   1
  -3   0  -7 4.76263 2.76141   7
  -3   0  -8 197.080 20.0341   7
  -3   0  -8 179.557 19.3002   1
   3   0   8 203.092 19.5692   1
   3   0   9 59.0098 7.08334   1
  -3   0  -9 56.4734 7.53846   7
   3   0  10 37.0629 5.28937   1
  -3   0 -10 38.0853 5.90170   7
   3   0  11 443.033 43.8588   1
  -3   0 -11 443.131 44.5392   7
  -3   0 -11 470.626 46.3106   2
  -3   0 -12 40.3106 8.08822   2
   3   0  12 31.4111 4.97007   1
  -3   0 -12 36.6601 5.80355   7
  -3   0 -13-0.94489 5.21477   2
  -3   0 -13 2.90681 3.28590   7
   3   0  13-0.39271 2.53308   1
   3   0  14 4.49592 2.61019   1
  -3   0 -14 4.93686 3.27157   7
  -3   0 -14 8.76846 5.59119   2
   3   0  15 7.64907 2.83059   1
  -3   0 -15 0.65298 3.50255   7
  -3   0 -15 14.0193 5.93653   2
   3   0  16-0.44118 2.46582   1
  -3   0 -16-3.08454 5.53486   2
  -3   0 -16-0.68850 3.41000   7
   3   0  17 261.692 28.0119   1
  -3   0 -17 298.574 29.3685   7
  -3   0 -17 284.799 30.9476   2
   3   0  18 37.0267 5.92164   1
  -3   0 -18 44.1907 8.74167   2
  -3   0 -18 47.9806 7.63109   7
   3   0  19 148.219 17.0537   1
  -3   0 -19 164.504 18.6734   7
  -3   0 -19 185.926 20.5118   2
  -3   0 -20 100.946 14.7670   2
   3   0  20 93.1710 11.8201   1
  -3   0 -20 122.173 13.6515   7
  -3   0 -21 383.404 38.5044   7
   3   0  21 358.132 36.9945   1
  -3   0 -22-1.82946 4.73258   7
   3   0  22 3.30898 2.93368   1
  -3   0 -23 123.250 15.9094   7
  -3   0 -24 33.8682 7.62665   7
  -3   0 -25 21.8215 6.77984   7
  -3   0 -26 10.8339 5.84655   7
  -3   0 -27-1.12779 4.66292   7
  -3   0 -28 51.6184 10.0248   7
  -3   0 -29 17.0947 7.00929   7
  -3   0 -30 5.07964 5.49363   7
  -3   0 -31 23.7569 7.95460   7
  -3  -1  28 4.26744 6.61463   1
   3   1 -22 130.548 16.9514   7
   3   1 -21 12.3039 5.77689   7
   3   1 -20 17.5592 6.17267   7
   3   1 -19 22.0377 5.86567   7
   3   1 -18 380.199 39.6264   7
   3   1 -17 34.0022 6.96037   7
   3   1 -16 492.554 50.0179   7
   3   1 -15 13.9120 4.91093   7
   3   1 -14 71.4637 10.0305   7
   3   1 -13 15.7360 4.72827   7
   3   1 -12-0.68029 3.51858   7
   3   1 -11 47.0165 7.47089   7
   3   1 -10 77.2350 10.0942   7
   3   1  -9 4.68685 3.18435   7
   3   1  -8 16.2134 4.57445   7
  -3  -1   7 5.81509 3.04086   7
   3   1  -7 6.86476 5.41155   8
  -3  -1   6 463.931 43.9705   7
   3   1  -6 441.613 45.4655   8
  -3  -1   6 407.415 46.6039   8
  -3  -1   5 990.022 94.0349   7
   3   1  -5 980.688 95.9403   8
  -3  -1   5 932.548 97.7364   8
   3   1  -4 71.8415 9.17610   7
  -3  -1   4 90.0693 9.20728   7
  -3  -1   4 75.0360 16.5910   8
   3   1  -4 68.8105 12.1800   8
   3   1  -3 820.072 86.6016   8
  -3  -1   3 746.084 87.7232   8
   3   1  -3 896.460 83.8360   7
  -3  -1   3 910.524 83.6892   7
   3   1  -3 863.257 83.5476   1
  -3  -1   3 863.585 83.4812   1
   3   1  -2 32.7920 5.15480   1
  -3  -1   2 45.2424 5.36033   1
  -3  -1   2 35.3340 8.66415   8
   3   1  -2 36.0231 12.3815   8
   3   1  -2 38.8749 5.65443   7
  -3  -1   2 49.7081 5.75359   7
   3   1  -1 49.3487 5.96201   1
  -3  -1   1 42.7324 5.73466   1
   3   1  -1 29.3249 12.6232   8
  -3  -1   1 62.9812 6.88007   8
   3   1  -1 50.2319 6.36864   7
  -3  -1   1 49.8533 6.14490   7
   3   1  -1 39.2749 7.34733   2
   3   1   0 2501.79 244.792   2
  -3  -1   0 2767.80 243.723   8
   3   1   0 2161.84 244.718   8
   3   1   0 2652.87 243.846   7
  -3  -1   0 2509.62 243.761   7
  -3  -1   0 2599.23 243.524   1
   3   1   0 2548.75 243.575   1
   3   1   1 128.114 16.2748   2
  -3  -1  -1 149.493 14.9112   8
   3   1   1 151.819 15.1159   8
   3   1   1 149.887 14.9732   7
  -3  -1  -1 148.978 15.0166   7
  -3  -1  -1 138.939 14.6107   1
   3   1   1 138.930 14.6408   1
   3   1   2 1653.40 152.878   1
  -3  -1  -2 1612.43 152.847   1
   3   1   2 1523.19 154.537   2
   3   1   2 1622.31 153.099   7
  -3  -1  -2 1580.26 153.166   7
   3   1   2 1590.88 153.134   8
   3   1   3 2623.61 246.807   1
  -3  -1  -3 2619.92 246.803   1
   3   1   3 2559.18 247.135   8
   3   1   3 2599.11 247.011   7
  -3  -1  -3 2590.19 247.124   7
   3   1   4 159.292 16.4230   7
  -3  -1  -4 153.560 16.5366   7
  -3  -1  -4 162.391 16.1861   1
  -3  -1  -4 152.911 18.6260   2
   3   1   4 171.451 16.2102   1
  -3  -1  -5 89.1679 12.7780   2
   3   1   5 92.3091 9.59166   1
  -3  -1  -5 92.4876 9.56247   1
   3   1   5 91.3161 9.84341   7
  -3  -1  -5 90.3366 10.0204   7
  -3  -1  -6 54.9264 9.98835   2
   3   1   6 59.6106 6.98366   1
  -3  -1  -6 66.0744 7.03202   1
   3   1   6 63.6380 7.40388   7
  -3  -1  -6 72.7503 7.65427   7
   3   1   7 103.893 10.6041   1
  -3  -1  -7 100.295 10.5049   1
  -3  -1  -7 102.673 11.1249   7
  -3  -1  -7 102.191 13.8197   2
   3   1   7 98.4439 10.8957   7
  -3  -1  -8 117.053 13.7052   2
  -3  -1  -8 92.9622 9.80016   1
   3   1   8 90.9963 9.89357   1
  -3  -1  -8 91.3012 10.4485   7
  -3  -1  -9 9.02859 3.25863   7
  -3  -1  -9 6.20007 2.16861   1
   3   1   9 11.6831 2.54741   1
  -3  -1  -9 9.28063 6.09340   2
   3   1  10 718.368 66.6830   1
  -3  -1 -10 657.791 66.4583   1
  -3  -1 -10 701.767 69.6186   2
  -3  -1 -10 718.506 67.3385   7
  -3  -1 -11 78.5717 12.3704   2
  -3  -1 -11 80.3333 8.79436   1
  -3  -1 -11 84.7556 9.81257   7
   3   1  11 80.4788 8.98317   1
  -3  -1 -12 12.7476 3.43290   7
   3   1  12 17.1279 3.06011   1
  -3  -1 -12 13.1353 2.63872   1
  -3  -1 -12 11.5394 6.46852   2
  -3  -1 -13 3.14377 2.97645   7
  -3  -1 -13 5.42298 5.29652   2
   3   1  13 2.86261 2.01816   1
   3   1  14 64.0634 7.86850   1
  -3  -1 -14 71.4614 8.82723   7
  -3  -1 -14 70.6593 11.7698   2
   3   1  15 98.1772 10.3357   1
  -3  -1 -15 92.5079 11.1948   7
  -3  -1 -15 69.5410 13.1035   2
  -3  -1 -16 67.2054 9.01203   7
   3   1  16 72.0969 8.17413   1
  -3  -1 -16 59.8391 11.5647   2
  -3  -1 -17 39.2619 8.71880   2
  -3  -1 -17 29.8720 5.65921   7
   3   1  17 27.5596 4.53180   1
  -3  -1 -18 27.6089 8.05662   2
  -3  -1 -18 29.3990 5.77470   7
   3   1  18 25.2119 4.53546   1
  -3  -1 -19 8.97698 7.17454   2
   3   1  19 5.42937 2.79414   1
  -3  -1 -19 1.47874 3.62731   7
  -3  -1 -20 455.613 48.8355   2
   3   1  20 439.720 45.0962   1
  -3  -1 -20 496.283 46.8415   7
  -3  -1 -21 57.1977 11.1165   2
  -3  -1 -21 48.8955 8.28109   7
  -3  -1 -22 302.184 37.1179   2
  -3  -1 -22 362.128 35.7220   7
  -3  -1 -23 278.754 30.1609   7
  -3  -1 -24 22.3648 6.26939   7
  -3  -1 -25 13.6299 5.65126   7
  -3  -1 -26 6.10656 4.99564   7
  -3  -1 -27 4.24703 4.94439   7
  -3  -1 -28 58.6565 10.3091   7
  -3  -1 -29 32.3060 8.10538   7
  -3  -1 -30 33.6629 8.44583   7
  -3  -1 -31 66.3579 11.7124   7
  -3  -1 -32-11.7291 7.27722   7
  -3  -2  30 36.5768 10.8019   1
   3   2 -29 18.0720 7.91793   7
  -3  -2  29 35.1227 10.2771   1
   3   2 -28 42.6489 10.4957   7
  -3  -2  28 55.1086 12.1452   1
   3   2 -27-1.28063 6.53011   7
  -3  -2  27 2.94547 6.95259   1
   3   2 -26 26.9742 7.73400   7
  -3  -2  26 9.96658 7.24953   1
   3   2 -25 1.17481 5.16424   7
   3   2 -24 18.0188 7.07174   7
   3   2 -23 33.5468 7.72309   7
   3   2 -22 22.9840 6.90610   7
   3   2 -21 48.5855 9.13843   7
   3   2 -20 12.6938 5.32492   7
   3   2 -19 55.2895 9.44992   7
   3   2 -18 64.4804 9.87510   7
   3   2 -17 12.3655 4.58860   7
   3   2 -16 396.287 40.7267   7
   3   2 -15 131.613 15.5174   7
   3   2 -14 262.820 27.7770   7
   3   2 -13 30.8317 5.94550   7
   3   2 -12 9.95716 3.69491   7
   3   2 -11 80.6962 10.3074   7
   3   2 -10 16.9907 4.30643   7
   3   2  -9 95.0460 11.3454   7
   3   2  -8 336.780 34.5707   2
   3   2  -8 349.800 34.9176   7
   3   2  -8 366.782 37.2225   8
   3   2  -7 0.92490 3.01584   7
   3   2  -7 3.90773 3.39462   2
   3   2  -7 0.98481 6.57777   8
   3   2  -6 817.842 80.0831   2
   3   2  -6 820.985 79.9798   7
   3   2  -6 859.921 82.5230   8
   3   2  -5 964.422 92.4869   8
   3   2  -5 915.024 89.9814   2
  -3  -2   4 294.281 27.6228   7
   3   2  -4 257.371 27.4534   7
   3   2  -4 279.452 31.2705   8
   3   2  -4 284.708 28.6201   2
  -3  -2   3 2776.43 263.608   7
   3   2  -3 2801.05 263.701   7
   3   2  -3 2739.25 267.298   8
   3   2  -3 2745.19 264.716   2
   3   2  -2 1770.99 173.670   2
   3   2  -2 1722.58 176.721   8
  -3  -2   2 1551.72 177.033   8
  -3  -2   2 1833.23 172.377   1
   3   2  -2 1875.14 172.449   7
  -3  -2   2 1815.73 172.241   7
  -3  -2   1 108.495 12.2363   1
   3   2  -1 124.578 12.5154   7
  -3  -2   1 124.635 12.2114   7
  -3  -2   1 120.183 14.1512   2
  -3  -2   1 127.845 16.6164   8
   3   2  -1 120.518 20.2345   8
   3   2  -1 99.9238 14.0215   2
  -3  -2   0 2087.68 192.253   2
   3   2   0 1938.41 192.198   2
   3   2   0 1971.36 190.397   1
  -3  -2   0 2031.22 190.367   1
  -3  -2   0 2406.36 191.862   8
   3   2   0 1629.09 194.808   8
   3   2   0 2049.70 190.482   7
  -3  -2   0 1882.59 190.256   7
  -3  -2  -1 618.866 60.3201   2
   3   2   1 621.588 60.5200   2
  -3  -2  -1 573.709 58.0541   7
   3   2   1 640.120 58.1907   7
   3   2   1 595.211 58.1224   1
  -3  -2  -1 581.787 58.0577   1
   3   2   1 496.321 60.7720   8
  -3  -2  -1 705.825 58.8871   8
  -3  -2  -2 61.6247 7.35613   8
   3   2   2 61.4906 6.63963   7
  -3  -2  -2 64.0852 6.78294   7
   3   2   2 55.8514 6.56767   1
  -3  -2  -2 51.5564 6.43941   1
   3   2   2 63.2060 10.1329   2
  -3  -2  -2 71.1349 10.0422   2
   3   2   3 9.83657 2.07510   1
  -3  -2  -3 7.71699 1.96562   1
   3   2   3 4.31844 1.95304   7
  -3  -2  -3 6.16486 2.35577   7
   3   2   4 10.8780 2.23673   1
  -3  -2  -4 10.5670 2.63935   7
  -3  -2  -4 12.6089 2.18123   1
   3   2   4 10.1154 2.30892   7
   3   2   5 111.546 11.3957   1
  -3  -2  -5 121.395 11.4472   1
  -3  -2  -5 103.057 11.7209   7
   3   2   5 115.513 11.6391   7
  -3  -2  -6 155.625 15.5268   7
   3   2   6 151.633 15.3568   7
  -3  -2  -6 142.651 14.9393   1
  -3  -2  -6 164.643 19.0792   2
   3   2   6 158.342 15.0048   1
  -3  -2  -7 3.64110 2.17075   7
   3   2   7-0.23880 1.92179   7
  -3  -2  -7 3.62623 1.42977   1
  -3  -2  -7-2.00333 6.63510   2
   3   2   7 2.53792 1.39829   1
   3   2   8 298.488 31.2336   7
  -3  -2  -8 347.558 31.5757   7
   3   2   8 319.986 30.7743   1
  -3  -2  -8 320.043 30.7774   1
  -3  -2  -8 300.489 34.6152   2
  -3  -2  -9 155.436 22.1332   2
  -3  -2  -9 191.898 18.5877   1
   3   2   9 189.412 18.6085   1
  -3  -2  -9 197.082 19.4524   7
  -3  -2 -10 242.937 24.4710   1
   3   2  10 262.562 24.5730   1
  -3  -2 -10 239.774 28.6141   2
  -3  -2 -10 254.882 25.4216   7
  -3  -2 -11 19.9171 2.98550   1
   3   2  11 23.2783 3.24858   1
  -3  -2 -11 37.0121 4.68052   7
  -3  -2 -11 23.9422 8.15959   2
   3   2  12 0.42717 1.59744   1
  -3  -2 -12 2.61507 2.63149   7
  -3  -2 -12 2.48419 7.02078   2
   3   2  13 0.46751 1.64919   1
  -3  -2 -13 3.86427 6.66116   2
  -3  -2 -13-1.87758 2.83201   7
  -3  -2 -14 53.3993 10.5845   2
   3   2  14 46.9126 5.75765   1
  -3  -2 -14 49.0459 6.77806   7
   3   2  15 4.63482 1.99840   1
  -3  -2 -15 1.37361 7.31816   2
  -3  -2 -15 10.2727 3.49822   7
   3   2  16 39.0454 5.31801   1
  -3  -2 -16 47.8425 6.70675   7
  -3  -2 -16 46.6354 10.2406   2
   3   2  17 98.2072 10.9342   1
  -3  -2 -17 110.402 16.2108   2
  -3  -2 -17 105.157 12.2964   7
   3   2  18 187.410 19.7585   1
  -3  -2 -18 171.555 24.1494   2
  -3  -2 -18 222.547 21.4117   7
  -3  -2 -19 15.2167 8.91863   2
  -3  -2 -19 22.4763 5.19117   7
  -3  -2 -20 35.8977 10.0100   2
  -3  -2 -20 28.0092 5.82791   7
  -3  -2 -21 187.498 19.9398   7
  -3  -2 -21 150.930 22.5292   2
  -3  -2 -22 231.900 28.3843   2
  -3  -2 -22 224.207 24.7476   7
  -3  -2 -23 105.705 17.2889   2
  -3  -2 -23 106.157 13.5961   7
  -3  -2 -24 79.5622 11.4410   7
  -3  -2 -25 131.779 16.2984   7
  -3  -2 -26 1.92512 5.11737   7
  -3  -2 -27-1.00526 5.27109   7
  -3  -2 -28 1.04774 5.18848   7
  -3  -2 -29 26.2695 7.30332   7
  -3  -2 -30 78.8202 12.3480   7
  -3  -2 -31 14.3031 6.14094   7
  -3  -2 -32 38.5305 8.93487   7
  -3  -3  30 5.41177 8.53125   1
  -3  -3  29-1.73545 7.93292   1
   3   3 -29 9.74830 5.90446   7
  -3  -3  28 6.69989 7.71547   1
   3   3 -28 14.7110 6.40564   7
  -3  -3  27-1.60563 7.33059   1
   3   3 -27 6.41990 5.43198   7
  -3  -3  26 3.08508 7.16182   1
   3   3 -26 1.22914 4.97217   7
  -3  -3  25 17.7364 8.82461   1
   3   3 -25 27.0274 7.35421   7
  -3  -3  24 142.596 17.5601   1
   3   3 -24 93.3927 14.9133   7
   3   3 -23 46.2175 8.99357   7
   3   3 -22 5.13141 5.18049   7
   3   3 -21 11.7569 5.52004   7
   3   3 -20 14.9675 5.16772   7
   3   3 -19 42.1219 7.82346   7
   3   3 -18 104.412 13.4939   7
   3   3 -17 75.0659 10.5611   7
   3   3 -16 95.5221 12.4687   7
   3   3 -15 254.116 27.1908   7
   3   3 -14 180.758 20.0366   7
   3   3 -13 0.64836 3.39968   7
   3   3 -12-1.09835 2.57205   2
   3   3 -12-0.60031 2.88184   7
   3   3 -11 578.712 58.0431   7
   3   3 -11 595.808 57.1392   2
   3   3 -10 87.0120 10.9383   7
   3   3 -10 96.8074 10.6011   2
   3   3  -9 42.1240 6.33000   7
   3   3  -9 47.9634 6.58792   2
   3   3  -9 43.5262 9.79597   8
   3   3  -8 28.2223 4.67202   7
   3   3  -8 11.3659 4.28527   2
   3   3  -8 27.6899 8.25452   8
   3   3  -7 23.5174 4.41369   7
   3   3  -7 37.2442 9.13146   8
   3   3  -7 20.8074 5.17866   2
   3   3  -6 558.114 56.1125   2
   3   3  -6 617.618 59.3173   8
   3   3  -6 560.986 55.3294   7
   3   3  -5 17.1337 3.23131   7
   3   3  -5 19.4478 3.82786   7
   3   3  -5 16.3785 8.50490   8
   3   3  -5 15.5306 5.31777   2
   3   3  -4 643.870 58.6631   2
  -3  -3   4 588.664 57.8134   2
   3   3  -4 620.905 56.8867   7
   3   3  -4 623.497 61.4335   8
   3   3  -4 537.789 56.4793   7
   3   3  -3 104.451 9.91636   7
   3   3  -3 77.7498 9.48334   7
   3   3  -3 110.692 16.1960   8
   3   3  -3 93.7657 12.4075   2
  -3  -3   3 83.4304 11.2053   2
   3   3  -2 1184.32 112.276   2
  -3  -3   2 1161.77 111.563   2
   3   3  -2 1169.02 109.777   7
   3   3  -2 900.125 113.662   8
   3   3  -2 1169.62 109.831   7
   3   3  -1 2.65884 6.35033   2
  -3  -3   1 0.71902 4.47606   2
   3   3  -1 4.83156 2.27525   7
  -3  -3   1 1.97776 2.21978   1
  -3  -3   1 2.17439 1.75601   7
   3   3   0 293.966 30.7708   2
  -3  -3   0 283.082 29.5541   2
  -3  -3   0 264.350 27.1150   1
  -3  -3   0 279.090 26.7632   7
   3   3   0 275.147 26.9346   7
  -3  -3  -1 190.039 21.6453   2
  -3  -3  -1 186.983 18.2862   7
   3   3   1 194.564 18.4597   7
  -3  -3  -1 176.603 18.6319   1
  -3  -3  -2 2.27608 1.73830   1
  -3  -3  -2 1.33399 1.44715   7
  -3  -3  -2 8.20608 5.93580   2
   3   3   2 1.91065 1.45646   7
   3   3   3 216.479 26.5232   8
  -3  -3  -3 262.306 27.4982   2
  -3  -3  -3 258.881 23.4769   1
  -3  -3  -3 229.768 23.2392   7
   3   3   3 236.413 23.1568   7
   3   3   4 307.941 28.8317   8
  -3  -3  -4 265.553 30.6455   2
  -3  -3  -4 277.739 26.8762   1
  -3  -3  -4 281.368 26.9088   7
   3   3   4 269.373 26.7338   7
   3   3   5 179.558 17.8812   7
  -3  -3  -5 175.948 18.0111   7
  -3  -3  -5 186.628 17.8426   1
   3   3   5 197.212 19.3301   8
   3   3   6 99.1615 11.0452   7
   3   3   6 108.194 12.3004   8
  -3  -3  -6 120.282 11.3245   7
  -3  -3  -6 112.741 10.8887   1
  -3  -3  -7 384.824 36.8014   1
  -3  -3  -7 396.583 41.8138   2
  -3  -3  -7 388.974 37.3897   7
   3   3   7 395.506 38.3960   8
   3   3   7 377.778 37.2324   7
   3   3   8 737.941 73.2608   7
  -3  -3  -8 755.847 72.6389   1
  -3  -3  -8 780.530 77.6560   2
   3   3   8 777.573 72.6603   1
   3   3   8 748.843 74.2772   8
  -3  -3  -8 795.940 73.4399   7
  -3  -3  -9 75.4022 13.8988   2
   3   3   9 86.2166 9.51030   7
  -3  -3  -9 90.9987 9.56478   7
  -3  -3 -10 319.948 36.9782   2
   3   3  10 314.744 32.5423   7
  -3  -3 -10 351.123 32.6812   7
   3   3  11 267.443 25.6296   1
  -3  -3 -11 267.221 26.8091   7
  -3  -3 -11 280.530 31.5503   2
  -3  -3 -12 35.8007 5.23469   7
   3   3  12 38.0070 3.97332   1
  -3  -3 -12 28.0337 9.65865   2
   3   3  13 6.87759 1.42507   1
  -3  -3 -13 12.1492 8.40366   2
  -3  -3 -13 4.64203 2.54238   7
   3   3  14 26.1371 3.18955   1
  -3  -3 -14 20.4393 8.79710   2
  -3  -3 -14 24.0631 4.45650   7
  -3  -3 -15 64.6876 13.5433   2
   3   3  15 76.7775 7.71390   1
  -3  -3 -15 64.8003 8.80623   7
  -3  -3 -16 57.7181 12.4669   2
   3   3  16 63.5786 6.51923   1
  -3  -3 -16 47.1392 7.41220   7
  -3  -3 -17 141.430 14.9972   7
  -3  -3 -17 106.708 18.9125   2
  -3  -3 -18 121.728 13.6730   7
  -3  -3 -18 106.074 18.0753   2
  -3  -3 -19 198.604 21.2482   7
  -3  -3 -19 193.603 26.0998   2
  -3  -3 -20 16.2814 9.49138   2
  -3  -3 -20 2.60450 3.09589   7
  -3  -3 -21 59.2489 13.5591   2
  -3  -3 -21 73.7466 9.63511   7
  -3  -3 -22 15.0886 9.76020   2
  -3  -3 -22 2.18240 3.72685   7
  -3  -3 -23-1.90560 9.43904   2
  -3  -3 -23-3.07297 4.19692   7
  -3  -3 -24 3.87590 8.71449   2
  -3  -3 -24 9.70428 4.58470   7
  -3  -3 -25 49.6698 8.46347   7
  -3  -3 -26 0.90742 4.28459   7
  -3  -3 -27 106.670 14.2806   7
  -3  -3 -28 44.1029 8.34451   7
  -3  -3 -29 37.7013 8.35087   7
  -3  -3 -30 3.26807 4.70468   7
  -3  -3 -31-3.41634 6.21595   7
  -3  -3 -32 5.94792 5.35716   7
  -3  -3 -33-1.24041 5.01589   7
  -3  -4  29 5.67028 8.93877   1
   3   4 -28 20.2427 7.83061   7
  -3  -4  28 7.31229 8.58981   1
   3   4 -27 19.4332 7.17443   7
  -3  -4  27 35.1313 10.1931   1
   3   4 -26-1.24437 5.78235   7
  -3  -4  26 10.1582 7.58734   1
   3   4 -25 16.6878 6.74984   7
  -3  -4  25 14.6597 9.22303   1
   3   4 -24-3.42519 5.99908   7
  -3  -4  24 28.0980 9.03417   1
   3   4 -23 7.64131 5.53908   7
  -3  -4  23 8.97103 7.76974   1
   3   4 -22 7.28633 5.26231   7
  -3  -4  22 21.4196 8.32439   1
   3   4 -21-2.97121 4.76070   7
  -3  -4  21-2.74610 6.04052   1
   3   4 -20 9.44145 5.23542   7
  -3  -4  20 34.2863 8.63642   1
   3   4 -19 213.767 24.0809   7
   3   4 -18 3.40880 4.35730   7
   3   4 -17 155.046 18.2111   7
   3   4 -16 1.52926 3.36349   7
   3   4 -15 66.5143 9.54946   7
   3   4 -14 0.68334 3.48493   7
   3   4 -13 64.7632 9.00636   7
   3   4 -12 26.9647 5.26336   7
   3   4 -11 48.7669 7.18194   7
   3   4 -10 67.0623 7.57891   2
   3   4 -10 50.0572 7.62320   7
   3   4  -9 82.6712 10.0623   2
   3   4  -9 66.5678 12.5279   8
   3   4  -9 52.1813 7.81825   7
   3   4  -8 279.058 32.5927   8
   3   4  -8 250.603 28.3301   7
   3   4  -7 16.0167 7.30543   2
   3   4  -7 8.48387 7.56938   8
   3   4  -7 8.98716 3.04748   7
   3   4  -6 468.932 47.9408   7
   3   4  -6 456.774 52.1013   8
  -3  -4   6 473.102 48.6916   2
   3   4  -5 1398.11 139.808   7
  -3  -4   5 1369.82 140.933   2
   3   4  -4 459.246 49.2783   7
  -3  -4   4 557.209 51.5511   2
   3   4  -4 525.878 49.6251   7
   3   4  -3 72.1681 12.6021   2
   3   4  -3 47.8424 6.01745   7
  -3  -4   3 70.4354 9.24408   2
   3   4  -3 55.8454 6.34681   7
   3   4  -2 414.199 42.0613   7
   3   4  -2 458.251 42.1858   7
  -3  -4   2 453.537 44.9267   2
   3   4  -1 479.980 47.4893   7
   3   4  -1 502.866 47.4461   7
  -3  -4   1 521.979 50.7740   2
   3   4   0 65.3305 16.2638   8
  -3  -4   0 51.3764 9.78576   2
   3   4   0 63.5490 6.67636   7
   3   4   0 61.6575 6.48821   7
   3   4   1 268.062 25.7371   7
   3   4   1 252.480 34.5762   8
  -3  -4  -1 323.502 30.7008   2
   3   4   1 264.000 25.8190   7
  -3  -4  -2 257.175 29.2369   2
   3   4   2 250.760 33.7712   8
  -3  -4  -3 879.304 77.7117   2
  -3  -4  -3 768.757 72.6793   1
  -3  -4  -4 216.311 25.7103   2
   3   4   4 150.980 25.1681   8
  -3  -4  -4 214.097 20.4396   1
   3   4   5 60.7644 12.4855   8
   3   4   5 89.4137 8.62453   7
  -3  -4  -5 89.6081 8.95475   1
  -3  -4  -5 87.4463 15.2564   2
  -3  -4  -5 85.7305 8.67503   7
   3   4   6 0.24957 1.20968   7
  -3  -4  -6 0.62834 1.17406   7
  -3  -4  -6 2.91840 7.75316   2
   3   4   6 2.06328 4.19222   8
  -3  -4  -6 1.27512 1.08338   1
  -3  -4  -7 145.544 13.4921   1
  -3  -4  -7 125.937 13.4366   1
   3   4   7 145.603 13.9207   7
  -3  -4  -7 145.919 13.9065   7
   3   4   7 174.372 16.0751   8
  -3  -4  -8 3.14763 1.62458   7
   3   4   8 0.51940 3.27135   8
   3   4   8 3.98179 1.71801   7
  -3  -4  -9 39.1294 4.92788   7
  -3  -4  -9 49.2392 12.0981   2
   3   4   9 47.6021 6.47513   8
   3   4   9 37.4033 4.91982   7
   3   4  10 105.008 11.4190   7
  -3  -4 -10 109.846 11.3519   7
  -3  -4 -10 89.9630 16.8059   2
   3   4  10 111.031 12.5412   8
   3   4  11 5.78382 3.48777   8
  -3  -4 -11 3.46325 8.74456   2
  -3  -4 -11 9.99115 2.49979   7
   3   4  11 10.6426 2.90484   7
  -3  -4 -12 7.16130 7.57066   2
  -3  -4 -12 4.09789 2.35393   7
  -3  -4 -13 139.884 14.6225   7
  -3  -4 -13 126.034 20.3729   2
  -3  -4 -14 54.0797 13.6501   2
  -3  -4 -14 62.8104 7.66039   7
  -3  -4 -15 69.1887 8.14482   7
  -3  -4 -15 47.6208 13.3659   2
  -3  -4 -16 11.5489 9.73041   2
  -3  -4 -16 11.0797 3.30487   7
  -3  -4 -17 17.7244 9.69643   2
  -3  -4 -17 13.8289 3.76119   7
  -3  -4 -18 28.2277 11.0781   2
  -3  -4 -18 42.2437 6.28366   7
  -3  -4 -19 20.4731 10.8794   2
  -3  -4 -19-3.37910 3.29875   7
  -3  -4 -20 29.1667 12.0749   2
  -3  -4 -20 7.18783 3.63869   7
  -3  -4 -21 125.626 14.6612   7
  -3  -4 -21 127.466 21.5337   2
  -3  -4 -22 23.6412 5.15104   7
  -3  -4 -22 12.9632 10.2334   2
  -3  -4 -23 40.1380 6.91446   7
  -3  -4 -23 41.7893 13.1425   2
  -3  -4 -24 1.51654 3.98143   7
  -3  -4 -24 6.72159 9.65794   2
  -3  -4 -25 18.4269 5.46310   7
  -3  -4 -25 29.5933 12.2434   2
  -3  -4 -26 5.92106 4.28166   7
  -3  -4 -26 2.29647 10.4860   2
  -3  -4 -27 106.672 14.2127   7
  -3  -4 -28 7.60441 5.23116   7
  -3  -4 -29 52.3669 9.28929   7
  -3  -4 -30 52.3638 9.68326   7
  -3  -5  28 11.8243 9.82119   1
  -3  -5  27 9.57275 8.10380   1
   3   5 -27 3.98626 6.08649   7
  -3  -5  26 98.2465 17.0039   1
   3   5 -26 71.2228 12.7979   7
  -3  -5  25 21.4530 9.67656   1
   3   5 -25 6.09684 6.47376   7
  -3  -5  24 37.8073 11.0963   1
   3   5 -24 29.1602 7.71886   7
  -3  -5  23-4.94527 7.79025   1
   3   5 -23-3.34987 5.86530   7
  -3  -5  22 1.58067 7.58539   1
   3   5 -22-1.06680 4.77777   7
  -3  -5  21 7.56030 7.51800   1
   3   5 -21 7.13339 5.31457   7
  -3  -5  20 20.1915 8.53012   1
   3   5 -20 18.4347 6.06598   7
  -3  -5  19 1.37788 6.83734   1
   3   5 -19 6.46893 4.73419   7
  -3  -5  18 187.460 19.8200   1
   3   5 -18 108.093 15.8993   7
   3   5 -17 264.889 32.5452   7
  -3  -5  17 424.921 36.3826   1
  -3  -5  16-2.38272 5.89865   1
   3   5 -16 1.57744 3.90514   7
   3   5 -15 16.3578 4.74505   7
   3   5 -14 61.5183 8.85914   7
   3   5 -13 3.27924 3.26198   7
   3   5 -12 7.97141 3.73830   7
   3   5 -11 2.85756 2.96780   7
   3   5 -10 3.71287 2.91253   7
   3   5  -9 485.985 47.9996   7
  -3  -5   8 11.2720 4.37235   2
   3   5  -8 18.7887 3.90305   7
  -3  -5   7 112.207 14.0158   2
   3   5  -7 127.094 13.2706   7
  -3  -5   6 9.74444 4.96156   2
   3   5  -6 9.86405 2.86388   7
  -3  -5   5 12.5987 5.33975   2
   3   5  -5 26.6459 6.22642   2
   3   5  -5 19.1047 3.45023   7
   3   5  -4 85.3271 7.95428   7
   3   5  -4 57.6193 7.22832   7
   3   5  -4 79.7476 14.4464   8
  -3  -5   4 65.3441 10.4636   2
   3   5  -3 23.8753 3.54331   7
  -3  -5   3 28.4150 7.23051   2
   3   5  -3 24.2509 3.21818   7
   3   5  -3 17.1758 9.86166   8
   3   5  -2 185.583 16.8049   7
  -3  -5   2 190.931 21.1849   2
   3   5  -2 212.488 25.0810   8
   3   5  -2 150.062 16.5391   7
  -3  -5   1 34.3479 8.00432   2
   3   5  -1 25.6253 3.32789   7
   3   5  -1 29.1271 3.46070   7
   3   5  -1 27.2363 11.4744   8
   3   5   0 11.3495 10.0308   8
  -3  -5   0 15.4624 7.00993   2
   3   5   0 15.0752 2.25939   7
   3   5   0 16.7953 2.15381   7
   3   5   1 106.383 20.7221   8
  -3  -5  -1 141.393 18.3216   2
   3   5   2 124.562 23.6550   8
  -3  -5  -2 152.775 15.7552   1
  -3  -5  -2 173.612 21.3160   2
   3   5   3-9.52398 12.6521   8
  -3  -5  -3 2.33643 1.65757   1
  -3  -5  -3 6.26791 8.43686   2
   3   5   4 39.0349 15.5872   8
  -3  -5  -4 54.9590 6.21026   1
  -3  -5  -4 56.0606 13.2573   2
   3   5   5 17.6798 12.9244   8
  -3  -5  -5 3.68905 1.68401   1
  -3  -5  -5 8.66171 8.96674   2
  -3  -5  -6 34.5436 11.4688   2
  -3  -5  -6 35.8714 4.14071   1
  -3  -5  -6 35.6517 4.13202   1
   3   5   6 23.1852 11.1640   8
   3   5   7 21.9455 8.61885   8
  -3  -5  -7 33.3024 3.40165   7
  -3  -5  -7 27.8227 3.29942   7
  -3  -5  -7 29.9798 12.0123   2
  -3  -5  -7 32.9921 3.54032   1
  -3  -5  -7 32.9450 3.57971   1
   3   5   8 79.9618 11.2987   8
  -3  -5  -8 75.9262 7.77673   7
  -3  -5  -8 74.7850 7.75911   7
   3   5   9 15.5374 5.00970   8
  -3  -5  -9 13.9968 2.53753   7
  -3  -5  -9 18.4567 2.57025   7
   3   5  10 81.2891 9.42967   8
  -3  -5 -10 75.9285 15.1512   2
  -3  -5 -10 56.8427 6.91512   7
  -3  -5 -10 64.5141 6.97199   7
  -3  -5 -11 293.166 35.0551   2
  -3  -5 -11 275.647 27.1574   7
  -3  -5 -11 268.772 27.1642   7
   3   5  11 289.802 28.9001   8
  -3  -5 -12 160.151 23.6895   2
   3   5  12 167.747 17.9668   8
  -3  -5 -12 159.847 16.3505   7
  -3  -5 -12 156.139 16.3766   7
   3   5  13 40.5097 6.86578   8
  -3  -5 -13 39.7073 5.28765   7
  -3  -5 -13 51.2673 13.3196   2
  -3  -5 -14 94.6913 10.5224   7
  -3  -5 -14 87.1264 17.5033   2
   3   5  14 98.2146 12.0910   8
  -3  -5 -15 40.2295 13.7945   2
   3   5  15 25.9834 6.18592   8
  -3  -5 -15 32.2691 4.70866   7
   3   5  16 142.677 16.3976   8
  -3  -5 -16 129.088 14.6740   7
  -3  -5 -16 178.961 24.0392   2
  -3  -5 -17 5.84255 2.81933   7
  -3  -5 -17 4.61639 10.1586   2
  -3  -5 -18 22.2597 4.35522   7
  -3  -5 -18 30.5908 12.8501   2
  -3  -5 -19 222.601 23.6441   7
  -3  -5 -19 248.875 32.2910   2
  -3  -5 -20 15.5322 4.07539   7
  -3  -5 -20 9.56789 10.9994   2
  -3  -5 -21 35.5294 5.79207   7
  -3  -5 -21 19.5581 12.1442   2
  -3  -5 -22 6.31973 3.56602   7
  -3  -5 -22-2.47621 11.3045   2
  -3  -5 -23 10.0625 4.02066   7
  -3  -5 -23 22.6084 12.2934   2
  -3  -5 -24 4.27737 3.55627   7
  -3  -5 -24 7.61331 10.9450   2
  -3  -5 -25 69.7287 17.6354   2
  -3  -5 -26 57.7347 16.4393   2
  -3  -5 -27 29.2043 14.3735   2
   3   6 -27 5.52223 6.08968   7
   3   6 -26 21.2214 7.73868   7
  -3  -6  26 39.7120 11.7517   1
   3   6 -25 17.7865 7.22371   7
  -3  -6  25 9.65350 8.26320   1
   3   6 -24 3.65855 5.57273   7
  -3  -6  24 3.74285 8.07232   1
   3   6 -23 4.66810 5.47375   7
  -3  -6  23 19.8366 9.61354   1
   3   6 -22 40.1184 9.26943   7
  -3  -6  22 91.9698 14.5153   1
   3   6 -21 53.1664 10.2210   7
  -3  -6  21 75.0074 13.7511   1
   3   6 -20 28.3819 6.95587   7
  -3  -6  20 11.1431 8.36661   1
   3   6 -19 31.8257 7.44694   7
  -3  -6  19 39.5698 10.1715   1
   3   6 -18 0.91581 4.54189   7
  -3  -6  18 7.26043 6.62767   1
   3   6 -17 39.9323 7.82803   7
   3   6 -16 10.6817 4.64571   7
   3   6 -15 215.285 23.7716   7
   3   6 -14 94.3964 12.7425   7
  -3  -6  14 121.175 15.4496   1
   3   6 -13 17.1946 4.95076   7
  -3  -6  13 28.8852 7.42442   1
  -3  -6  12 129.182 15.5779   1
   3   6 -12 103.732 13.2863   7
  -3  -6  11 8.87519 5.51026   1
   3   6 -11-0.60069 3.27786   7
  -3  -6  10 2.77310 4.58892   1
   3   6 -10 3.90773 2.78416   7
  -3  -6   9 67.1500 9.86110   2
   3   6  -9 77.8825 9.51627   7
  -3  -6   9 88.4942 11.5041   1
   3   6  -8 30.8827 10.6525   8
  -3  -6   8 16.9214 5.16151   2
  -3  -6   8 18.6736 5.34991   1
   3   6  -8 18.4656 4.08018   7
   3   6  -7 8.98638 9.50399   8
  -3  -6   7 8.69166 4.92624   2
  -3  -6   7 15.1534 4.78166   1
   3   6  -7 14.6898 3.47575   7
  -3  -6   6 37.9913 8.84617   2
   3   6  -6 59.3276 13.1560   8
   3   6  -6 63.9892 7.38783   7
  -3  -6   6 61.3376 8.64918   1
   3   6  -5 30.5574 10.5368   8
  -3  -6   5 35.7409 7.72778   2
  -3  -6   5 27.5727 5.80954   1
   3   6  -5 28.9607 4.44481   7
   3   6  -4 83.6193 15.2477   8
  -3  -6   4 75.2819 9.96439   1
   3   6  -4 82.9402 8.91332   7
  -3  -6   4 68.6026 12.2852   2
  -3  -6   3 101.263 13.1365   2
  -3  -6   3 90.1780 9.07838   1
   3   6  -3 86.8960 15.2891   8
   3   6  -3 69.9989 7.31249   7
   3   6  -3 50.6260 6.70642   7
  -3  -6   2 70.6907 8.20504   1
   3   6  -2 50.1179 6.22675   7
  -3  -6   2 71.4924 12.2840   2
   3   6  -2 77.1622 15.2040   8
   3   6  -2 68.4264 6.71988   7
   3   6  -1 18.3196 2.64904   7
   3   6  -1 7.75210 9.44998   8
   3   6  -1 16.0217 2.36559   7
  -3  -6   1 33.3104 9.64718   2
  -3  -6   1 23.9297 4.21687   1
   3   6   0 156.642 22.9679   8
   3   6   0 154.279 14.6701   7
  -3  -6   0 182.827 16.3269   1
  -3  -6   0 199.086 22.6489   2
   3   6   0 137.409 14.5924   7
   3   6   1 118.004 20.2357   8
  -3  -6  -1 119.860 13.1664   1
  -3  -6  -1 136.292 19.0213   2
  -3  -6  -2 67.3924 12.9862   2
  -3  -6  -2 43.0953 5.85335   1
   3   6   2 43.1199 14.1887   8
  -3  -6  -3 26.3656 10.3615   2
  -3  -6  -3 23.0584 3.73268   1
   3   6   3 11.9007 12.3248   8
  -3  -6  -4 509.882 53.6302   2
   3   6   4 452.959 55.1886   8
  -3  -6  -4 471.491 45.9814   1
  -3  -6  -5 65.4638 7.42080   1
   3   6   5 74.6693 18.4590   8
  -3  -6  -5 76.0459 15.9057   2
   3   6   6-5.48467 13.3770   8
  -3  -6  -6 8.43707 10.6086   2
  -3  -6  -6 4.54839 1.80017   1
  -3  -6  -7 343.362 32.9166   1
  -3  -6  -7 345.562 41.5337   2
   3   6   7 285.417 42.1394   8
  -3  -6  -8 540.263 57.2769   2
  -3  -6  -8 490.383 47.8171   1
  -3  -6  -8 521.629 47.8741   1
   3   6   9 43.0809 12.8818   8
  -3  -6  -9 64.0077 15.9808   2
  -3  -6  -9 66.3940 6.68802   7
   3   6  10 74.8307 13.0804   8
  -3  -6 -10 78.1739 8.10536   7
  -3  -6 -11 225.835 23.0104   7
   3   6  11 295.631 27.6824   8
  -3  -6 -12-12.0350 11.9177   2
  -3  -6 -12-0.24540 1.71935   7
   3   6  12 0.90640 4.68768   8
  -3  -6 -13 34.7450 14.3051   2
   3   6  13 69.9158 8.96780   8
  -3  -6 -13 45.6474 5.87574   7
   3   6  14 130.638 14.7709   8
  -3  -6 -14 111.065 12.3397   7
  -3  -6 -14 134.873 22.4067   2
  -3  -6 -15 49.3169 15.1614   2
  -3  -6 -15 27.3899 4.58965   7
   3   6  15 50.6369 7.30648   8
  -3  -6 -16 318.576 41.6336   2
   3   6  16 323.618 33.8502   8
   3   6  17 6.45713 4.56418   8
  -3  -6 -17 13.3577 10.5756   2
   3   6  18 4.20877 4.18993   8
  -3  -6 -18 8.02729 13.0530   2
   3   6  19 60.3612 9.77040   8
  -3  -6 -19 71.4417 18.2179   2
   3   6  20 38.2462 7.69331   8
  -3  -6 -20 27.8338 14.6007   2
   3   6  21 71.1368 11.0072   8
  -3  -6 -21 72.8261 19.2878   2
   3   6  22 37.6418 8.07542   8
  -3  -6 -22 22.5689 14.3403   2
   3   6  23 7.23274 5.46756   8
  -3  -6 -23 11.3823 12.9990   2
   3   6  24-4.30602 5.50685   8
  -3  -6 -24-5.75567 13.1323   2
   3   6  25 44.8816 9.34695   8
  -3  -6 -25 26.2483 15.1410   2
  -3  -6 -26-11.8429 12.8082   2
  -3  -6 -27 56.8708 18.1220   2
  -3  -6 -28 3.03824 12.8318   2
   3   7 -26 9.83478 6.91286   7
   3   7 -25-8.05844 7.36072   7
  -3  -7  24 196.967 25.5559   1
   3   7 -24 157.767 21.5898   7
  -3  -7  23 3.84711 8.29693   1
   3   7 -23 3.67292 5.59480   7
  -3  -7  22 7.43132 8.78530   1
   3   7 -22 4.69188 5.27804   7
  -3  -7  21-3.58288 7.72472   1
   3   7 -21-2.24886 5.22577   7
  -3  -7  20 18.9790 8.78168   1
   3   7 -20 12.8904 5.80054   7
   3   7 -19 3.07395 4.59810   7
   3   7 -18-4.88341 5.00146   7
   3   7 -17 15.7999 6.07304   7
  -3  -7  16 10.0851 7.77494   1
   3   7 -16 4.41033 4.71984   7
  -3  -7  15 138.115 17.0887   1
   3   7 -15 91.8750 13.3111   7
  -3  -7  14 11.6816 7.16315   1
   3   7 -14-3.15465 4.45741   7
  -3  -7  13 34.3662 8.64812   1
   3   7 -13 32.6580 6.68359   7
  -3  -7  12 183.349 20.3438   1
   3   7 -12 141.468 17.4871   7
  -3  -7  11 18.6146 6.46216   1
   3   7 -11 20.2095 4.76648   7
  -3  -7  10-1.02798 4.77956   1
   3   7 -10 4.88793 3.08342   7
  -3  -7   9 10.6265 5.42165   1
   3   7  -9 10.3332 3.56670   7
  -3  -7   8 5.45082 4.30670   1
   3   7  -8 3.13202 2.94220   7
   3   7  -8 8.04465 8.67593   8
   3   7  -7 23.9940 4.51790   7
  -3  -7   7 26.3582 6.32676   1
   3   7  -7 25.6385 10.5842   8
  -3  -7   7 20.5102 6.58790   2
  -3  -7   6 319.909 30.1757   1
  -3  -7   6 259.381 31.0076   2
   3   7  -6 279.267 34.4890   8
   3   7  -6 267.962 28.1578   7
  -3  -7   5-3.89504 7.33836   2
   3   7  -5 1.87673 2.12269   7
  -3  -7   5-0.74343 3.79149   1
   3   7  -5-1.94975 9.94205   8
  -3  -7   4 2.92563 7.35230   2
   3   7  -4-1.97790 2.34521   7
  -3  -7   4-0.69199 3.58002   1
   3   7  -4 9.75259 9.05375   8
  -3  -7   3-1.60916 7.47029   2
   3   7  -3 1.13678 1.98049   7
   3   7  -3 9.80872 9.56582   8
  -3  -7   3 2.57716 3.38112   1
   3   7  -2 23.6233 3.43294   7
   3   7  -2 17.9417 11.5934   8
  -3  -7   2 17.2350 4.58693   1
  -3  -7   1-3.75196 9.57469   2
  -3  -7   1 4.94130 3.09488   1
   3   7  -1 8.04448 9.01644   8
   3   7  -1 4.59638 1.79916   7
  -3  -7   0 351.696 37.5885   2
   3   7   0 285.304 36.8007   8
  -3  -7   0 295.429 30.6033   1
  -3  -7  -1 2.32171 2.44173   1
  -3  -7  -1 6.22905 9.12708   2
   3   7   1-6.32708 10.9081   8
  -3  -7  -2 717.420 65.6025   2
  -3  -7  -2 592.957 56.8393   1
   3   7   3-2.22581 11.1956   8
  -3  -7  -3 5.74794 2.33416   1
  -3  -7  -3-2.24456 9.87514   2
  -3  -7  -4 268.546 26.7840   1
  -3  -7  -4 312.544 36.5857   2
   3   7   4 225.653 34.2083   8
  -3  -7  -5 3.56797 2.08067   1
  -3  -7  -5-2.42181 11.2455   2
   3   7   5 10.5200 12.4199   8
   3   7   6 64.2885 18.4241   8
  -3  -7  -6 54.5080 15.9778   2
  -3  -7  -6 59.8244 6.99339   1
  -3  -7  -7 474.363 57.7121   2
   3   7   7 427.907 58.6550   8
  -3  -7  -7 514.764 48.8106   1
  -3  -7  -8 153.357 24.9378   2
   3   7   8 124.946 26.0543   8
  -3  -7  -9 7.99632 11.0392   2
   3   7   9 6.10246 14.6585   8
  -3  -7 -10 5.38900 12.0892   2
   3   7  10 11.1467 14.8236   8
   3   7  11 103.142 20.7629   8
   3   7  12 292.787 36.7580   8
  -3  -7 -13 323.764 39.2141   2
   3   7  13 244.117 32.2746   8
  -3  -7 -14 23.0287 13.6319   2
   3   7  14 8.34145 7.06964   8
  -3  -7 -15 180.857 30.2290   2
   3   7  15 202.821 24.0613   8
   3   7  16 114.113 15.7376   8
  -3  -7 -16 127.099 24.0106   2
   3   7  17 6.07599 5.94238   8
  -3  -7 -17 3.01385 12.1949   2
   3   7  18-2.93176 5.53565   8
  -3  -7 -18-9.28422 14.6142   2
   3   7  19 34.1082 7.63052   8
  -3  -7 -19 18.5032 15.7811   2
   3   7  20 77.7233 11.3359   8
  -3  -7 -20 59.4426 19.3998   2
   3   7  21 51.5321 9.84958   8
  -3  -7 -21 69.7688 18.8550   2
   3   7  22 26.8931 7.60581   8
  -3  -7 -22 41.7539 15.9046   2
   3   7  23 16.4829 6.70005   8
  -3  -7 -23 29.0694 14.3039   2
  -3  -7 -24-6.50322 16.3530   2
  -3  -7 -25-9.83795 16.7471   2
  -3  -7 -26 79.5524 20.5878   2
  -3  -7 -27 10.0683 13.2897   2
  -3  -7 -28 10.1426 13.7011   2
  -3  -7 -29-6.87775 14.8339   2
   3   8 -24 19.7372 8.31118   7
   3   8 -23 1.26843 5.68193   7
  -3  -8  22 33.4980 11.8709   1
   3   8 -22 20.7293 7.85401   7
   3   8 -21-9.37736 7.12733   7
   3   8 -20 4.49504 5.90680   7
   3   8 -19 7.52486 5.82965   7
  -3  -8  18 1.67886 7.65763   1
   3   8 -18 1.02652 5.00622   7
  -3  -8  17 64.1396 12.3627   1
   3   8 -17 52.7958 9.62261   7
  -3  -8  16 38.2024 10.0606   1
   3   8 -16 25.1058 6.92888   7
  -3  -8  15-1.45482 6.39403   1
   3   8 -15 1.76112 4.08769   7
  -3  -8  14 2.76221 6.96032   1
   3   8 -14 6.65638 4.56517   7
  -3  -8  13 158.386 19.3941   1
   3   8 -13 130.925 16.5284   7
   3   8 -12-2.20711 4.44012   7
  -3  -8  12 1.24074 5.55786   1
  -3  -8  11 72.6769 11.8796   1
  -3  -8  10 267.210 30.0608   1
  -3  -8   9 100.871 14.1212   1
  -3  -8   8 232.807 26.2123   1
   3   8  -7-2.13851 9.57735   8
  -3  -8   7 0.91861 4.75049   1
   3   8  -6-4.20757 9.93206   8
  -3  -8   6-1.72367 4.69916   1
  -3  -8   6 4.34717 7.99777   2
   3   8  -5 70.6324 16.0357   8
  -3  -8   5 86.2656 11.2454   1
  -3  -8   5 75.9834 15.0116   2
   3   8  -4 8.30141 9.85913   8
  -3  -8   4 13.5831 4.77393   1
  -3  -8   4 7.11450 9.26376   2
   3   8  -3 12.4631 10.4085   8
  -3  -8   3 18.3217 5.00672   1
  -3  -8   3 15.3720 9.21128   2
  -3  -8   2 134.498 20.4164   2
   3   8  -2 104.014 19.0318   8
  -3  -8   2 111.166 13.3493   1
   3   8  -1 43.9611 13.2304   8
  -3  -8   1 21.8465 4.99141   1
  -3  -8   1 36.5803 12.3961   2
  -3  -8   0 134.660 21.1666   2
   3   8   0 95.1875 19.0339   8
  -3  -8   0 119.649 13.5567   1
   3   8   1 2.17871 10.3915   8
  -3  -8  -1 16.4464 3.83980   1
  -3  -8  -1 26.4706 11.2672   2
   3   8   2 68.6375 17.2768   8
  -3  -8  -2 103.528 11.8403   1
  -3  -8  -3 15.0034 3.73147   1
   3   8   3 27.0674 12.6784   8
  -3  -8  -3 5.16727 11.2236   2
  -3  -8  -4 50.8009 6.87516   1
  -3  -8  -4 80.2110 18.2456   2
   3   8   4 52.6459 15.3320   8
   3   8   5 53.0642 16.6149   8
  -3  -8  -5 67.6422 8.29540   1
  -3  -8  -6 285.347 35.5271   2
   3   8   6 196.804 31.9909   8
  -3  -8  -7 5.77502 11.6803   2
   3   8   7 2.81523 15.1585   8
  -3  -8  -8 32.4865 16.2226   2
   3   8   8 35.8566 15.5763   8
  -3  -8  -9-11.9185 14.9970   2
   3   8   9-3.17726 13.7168   8
   3   8  10 3.32182 14.6194   8
  -3  -8 -10 12.2165 13.1846   2
   3   8  11 10.3152 15.7915   8
  -3  -8 -11 27.7798 14.6897   2
   3   8  12 20.7220 17.3610   8
  -3  -8 -12-6.34097 14.7204   2
   3   8  13 45.6295 18.4972   8
   3   8  14 6.05329 13.0557   8
   3   8  15-5.48770 14.7688   8
  -3  -8 -15 13.1660 14.1846   2
   3   8  16-7.02043 9.88381   8
  -3  -8 -16 6.67376 13.4918   2
   3   8  17-2.06920 10.2518   8
  -3  -8 -17-6.64056 15.1474   2
   3   8  18 19.9323 10.3968   8
  -3  -8 -18 17.0258 14.4891   2
   3   8  19-4.80828 7.57016   8
  -3  -8 -19 3.49149 12.7696   2
  -3  -8 -20 7.03994 13.9186   2
  -3  -8 -21-3.50544 14.4934   2
  -3  -8 -22 10.7194 15.1211   2
  -3  -8 -23-7.28087 13.3297   2
  -3  -8 -24 7.31972 14.8116   2
  -3  -8 -25 14.7120 15.5921   2
  -3  -8 -26 14.8080 16.6384   2
  -3  -8 -27 3.73381 14.3962   2
  -3  -8 -28 3.77473 14.9132   2
  -3  -9  20 17.1851 9.45045   1
  -3  -9  19-5.48919 8.21087   1
  -3  -9  18 7.03741 8.60363   1
  -3  -9  17 55.7628 12.4525   1
  -3  -9  16 8.05302 7.25317   1
  -3  -9  15 75.1093 13.7229   1
  -3  -9  14 1.45678 6.52565   1
  -3  -9  13 13.8448 7.47138   1
  -3  -9  12 6.55067 6.61332   1
  -3  -9  11 6.20049 5.78559   1
  -3  -9  10 41.0560 9.02822   1
  -3  -9   9 8.81542 6.13815   1
  -3  -9   8 243.434 27.4834   1
   3   9  -7 4.62386 10.6730   8
  -3  -9   7 21.4116 6.04260   1
   3   9  -6 15.7351 11.2013   8
  -3  -9   6 12.8044 5.66121   1
   3   9  -5 8.85844 10.4377   8
  -3  -9   5 22.4252 6.03719   1
  -3  -9   4 62.5594 9.49648   1
   3   9  -4 63.4664 15.4651   8
  -3  -9   4 51.7982 14.6487   2
  -3  -9   3 37.6361 7.03161   1
   3   9  -3 36.9789 12.9846   8
  -3  -9   3 52.0170 14.0116   2
  -3  -9   2 10.2043 4.43394   1
   3   9  -2-2.17768 10.3151   8
  -3  -9   2 16.4708 11.6807   2
  -3  -9   1 0.68997 3.71500   1
   3   9  -1 6.52632 10.0976   8
  -3  -9   1-2.46803 10.8469   2
  -3  -9   0 29.5198 5.91765   1
   3   9   0 32.7334 12.4034   8
  -3  -9   0 41.6825 13.2355   2
  -3  -9  -1 51.0579 7.47366   1
   3   9   1 44.1504 13.8568   8
  -3  -9  -1 46.5655 14.3457   2
  -3  -9  -2 0.59108 2.69579   1
   3   9   2-11.1738 10.7242   8
  -3  -9  -2 2.83312 10.0679   2
  -3  -9  -3 27.2575 5.08140   1
  -3  -9  -3 38.0526 13.8485   2
   3   9   3 29.8361 13.6819   8
   3   9   4 2.32836 10.4963   8
  -3  -9  -4 35.7669 15.0272   2
   3   9   5 33.3597 13.4295   8
  -3  -9  -5 77.0111 18.9322   2
   3   9   6 34.0517 14.6565   8
  -3  -9  -6 97.3540 21.0581   2
   3   9   7 88.1968 19.2709   8
  -3  -9  -7 128.223 24.8950   2
   3   9   8 16.1842 14.3405   8
  -3  -9  -8-3.27341 14.6691   2
   3   9   9 153.481 28.0691   8
  -3  -9  -9 244.398 34.3869   2
   3   9  10-3.13971 16.6970   8
  -3  -9 -10 23.9824 15.6418   2
   3   9  11 39.9098 18.4119   8
  -3  -9 -11 100.353 23.2812   2
   3   9  12 3.51860 14.8625   8
  -3  -9 -12-10.4884 16.2322   2
   3   9  13 3.66831 17.6263   8
  -3  -9 -13 14.3555 16.0978   2
   3   9  14 7.62190 16.7638   8
   3   9  15 31.4845 20.2870   8
   3   9  16-7.91211 19.5898   8
  -3  -9 -16 14.8746 15.7048   2
  -3  -9 -17 37.6752 17.5478   2
  -3  -9 -18 41.1909 18.6680   2
  -3  -9 -19-3.83612 17.1839   2
  -3  -9 -20 3.90711 14.2918   2
  -3  -9 -21-3.95709 16.7125   2
  -3  -9 -22-3.93597 17.6312   2
  -3  -9 -23 16.0250 15.8958   2
  -3  -9 -24 89.7027 24.5557   2
  -3  -9 -25 4.09394 16.1743   2
  -3  -9 -26 12.3271 17.3890   2
  -3 -10  18 99.1148 17.4799   1
  -3 -10  17 38.5613 10.1143   1
  -3 -10  16 26.7602 9.57071   1
  -3 -10  15 76.5092 13.9240   1
  -3 -10  14 24.2671 8.58006   1
  -3 -10  13 12.9758 7.45321   1
  -3 -10  12 36.9755 9.49944   1
  -3 -10  11 52.0339 10.7689   1
  -3 -10  10 23.4447 7.62058   1
  -3 -10   9 56.2889 10.3433   1
  -3 -10   8 100.209 14.4419   1
  -3 -10   7 49.6867 9.49455   1
  -3 -10   6-2.00781 5.47563   1
  -3 -10   5 20.0225 5.99337   1
   3  10  -5 18.7298 12.7400   8
  -3 -10   4 19.9898 5.95844   1
   3  10  -4 29.8413 12.2087   8
  -3 -10   3 11.2831 5.24649   1
   3  10  -3 13.6090 10.9406   8
  -3 -10   2 7.44008 4.81362   1
  -3 -10   2 7.92023 11.3916   2
   3  10  -2-2.25341 10.4746   8
  -3 -10   1 39.4622 7.39693   1
  -3 -10   1 35.9210 14.9615   2
   3  10  -1 42.7977 13.2690   8
  -3 -10   0 35.3565 6.68512   1
  -3 -10   0 46.6143 16.2256   2
   3  10   0 26.9754 13.1330   8
  -3 -10  -1 145.131 16.7759   1
  -3 -10  -1 174.722 26.8791   2
   3  10   1 130.552 22.5795   8
  -3 -10  -2 118.326 20.9903   2
   3  10   2 54.4065 15.8163   8
  -3 -10  -3 90.0902 19.1339   2
   3  10   3 18.3878 11.7446   8
  -3 -10  -4 9.96824 14.0591   2
   3  10   4 9.30579 12.0649   8
   3  10   5 61.9897 16.9511   8
  -3 -10  -5 118.406 24.8235   2
   3  10   6 51.0630 14.5696   8
  -3 -10  -6 38.4615 17.8526   2
   3  10   7 12.4278 11.4406   8
  -3 -10  -7 24.9639 16.9062   2
   3  10   8 10.1446 11.5888   8
  -3 -10  -8 3.63949 14.3927   2
   3  10   9 39.0636 14.0942   8
  -3 -10  -9 33.4656 18.1835   2
   3  10  10 10.9053 10.8524   8
  -3 -10 -10 22.4858 16.8380   2
   3  10  11-8.71845 11.7541   8
  -3 -10 -11 3.83530 14.7876   2
   3  10  12 3.14171 14.8455   8
  -3 -10 -12 11.6138 16.6957   2
  -3 -10 -13 59.5390 21.0076   2
  -3 -10 -14-4.00927 14.6655   2
  -3 -10 -15-4.05215 16.3858   2
  -3 -10 -18 8.37907 16.1679   2
  -3 -10 -19 12.6230 17.4332   2
  -3 -10 -20 8.60942 16.1928   2
  -3 -10 -21-8.65613 18.6695   2
  -3 -10 -22 74.3864 23.3938   2
  -3 -10 -23 4.36769 17.2559   2
  -3 -11  15-1.69736 7.31644   1
  -3 -11  14 6.47440 7.53749   1
  -3 -11  13-1.54196 7.03392   1
  -3 -11  12 32.3859 9.47975   1
  -3 -11  11-2.80223 5.54029   1
  -3 -11  10 118.998 17.0275   1
  -3 -11   9 6.37799 5.84878   1
  -3 -11   8 26.7461 8.17199   1
  -3 -11   7 12.7466 6.11243   1
  -3 -11   6 5.52713 5.49805   1
  -3 -11   5 79.2796 12.0761   1
   3  11  -4 9.70620 10.5216   8
  -3 -11   4 13.1556 6.09166   1
   3  11  -3 102.031 20.7455   8
  -3 -11   3 121.809 15.5236   1
   3  11  -2 37.4641 13.4962   8
  -3 -11   2 25.8639 6.85187   1
   3  11  -1 27.7542 11.8885   8
  -3 -11   1 24.1559 15.1569   2
   3  11   0 9.23458 10.8097   8
  -3 -11   0 25.0620 14.1022   2
   3  11   1-32.3305 13.0823   8
  -3 -11  -1 6.59580 13.5094   2
   3  11   2 6.91765 9.93708   8
  -3 -11  -2-6.81768 13.4638   2
   3  11   3-4.63236 11.1217   8
  -3 -11  -3-3.52285 10.5253   2
   3  11   4 13.9641 10.4451   8
  -3 -11  -4-3.58497 13.1266   2
   3  11   5 40.2839 14.8113   8
  -3 -11  -5 74.1496 21.0231   2
   3  11   6 4.77093 9.64532   8
  -3 -11  -6-3.77572 15.2649   2
   3  11   7 22.0559 13.3548   8
  -3 -11  -7 53.8991 20.4012   2
   3  11   8 2.49861 10.9808   8
  -3 -11  -8-3.92780 15.1396   2
  -3 -11  -9 16.0425 16.6470   2
  -3 -11 -10 32.7919 19.9131   2
  -3 -11 -11-25.1585 20.5817   2
  -3 -11 -12 33.8161 20.2092   2
  -3 -11 -13-4.32937 17.9000   2
  -3 -11 -14 30.5806 21.1627   2
  -3 -11 -15 26.4660 18.7922   2
  -3 -11 -16 31.1644 19.4109   2
  -3 -11 -19 37.0348 21.7701   2
  -3 -12  12 84.8306 15.3836   1
  -3 -12  11 46.5495 11.1004   1
  -3 -12  10 7.17997 6.69952   1
  -3 -12   9 23.3192 8.48254   1
  -3 -12   8 19.6762 8.20801   1
  -3 -12   7 1.25568 5.92896   1
  -3 -12   6 4.80619 6.23020   1
  -3 -12   5 97.6679 14.4517   1
   3  12  -2 51.2456 16.1972   8
   3  12  -1 12.0124 11.3982   8
   3  12   0 9.48580 10.0532   8
   3  12   1 16.4496 11.2020   8
   3  12   2 9.35983 9.50085   8
   3  12   3 7.05903 9.56607   8
  -3 -12  -3 18.5706 13.9903   2
  -3 -12  -4-7.68350 14.0668   2
  -3 -12  -5 7.95192 14.5583   2
  -3 -12  -6 16.2046 16.4488   2
  -3 -12  -7 16.5194 18.2168   2
  -3 -12  -8 8.56946 15.2480   2
  -3 -12  -9 43.0622 20.3974   2
  -3 -12 -10 35.1901 20.3354   2
  -3 -12 -11 4.49880 19.0004   2
  -3 -12 -12 4.60270 14.8496   2
  -3 -12 -13-13.9238 17.4864   2
  -3 -12 -14 28.0723 21.1211   2
  -3 -12 -15 4.79384 17.0417   2
  -3 -13   9-7.26828 7.23004   1
  -3 -13  -4 4.00439 10.9207   2
  -3 -13  -5 8.31369 14.3525   2
  -3 -13  -6-8.47834 16.7625   2
  -3 -13  -7 4.39990 18.1916   2
  -3 -13  -8 4.49345 18.1703   2
  -3 -13  -9 13.7680 20.5945   2
  -3 -13 -10 37.5363 19.2972   2
  -3 -13 -11 23.9877 19.5267   2
   4 -12   0 41.7935 9.81987   1
   4 -12   1 6.22542 6.00382   1
   4 -12   2 21.5379 7.83458   1
   4 -11  -3 25.4331 7.28119   1
   4 -11  -2 9.99283 5.65946   1
   4 -11  -1 25.7169 7.73160   1
   4 -11   0 13.6062 6.46265   1
   4 -11   1 17.3105 7.55588   1
   4 -11   2 22.4288 7.96875   1
   4 -11   3 6.06067 5.75081   1
   4 -11   4 2.44974 5.88246   1
   4 -11   5 8.71197 6.39929   1
   4 -11   6-2.54103 5.90187   1
   4 -11   7 2.59911 6.43903   1
   4 -11   8 5.31953 6.60366   1
   4 -10  -6 2.94120 4.78811   1
   4 -10  -5 35.5545 7.82921   1
   4 -10  -4 23.0095 6.80931   1
   4 -10  -3 14.0960 6.09678   1
   4 -10  -2 17.2227 6.20374   1
   4 -10  -1 3.07300 4.68070   1
   4 -10   0 3.13249 5.33242   1
   4 -10   1 3.21040 4.97619   1
   4 -10   2 2.19718 5.19034   1
   4 -10   3 21.0934 7.05375   1
   4 -10   4 3.38475 5.15554   1
   4 -10   5 57.6368 10.5653   1
   4 -10   6 11.7765 6.19097   1
   4 -10   7 3.61667 5.40990   1
   4 -10   8 1.23644 5.83810   1
   4 -10   9 39.3567 8.92750   1
   4 -10  10 37.8374 9.21302   1
   4 -10  11 71.0251 12.5362   1
   4 -10  12 1.37590 6.60392   1
   4 -10  13 8.48036 6.85867   1
  -4  10 -13 14.0024 8.10990   7
  -4  10 -14 7.95761 7.42513   7
  -4  10 -15 21.1886 8.66353   7
  -4  10 -16-6.68340 8.78247   7
   4  -9  -9-0.88746 4.25957   1
   4  -9  -8 22.2160 6.52242   1
   4  -9  -7 21.2837 6.29975   1
  -4   9   6 143.865 18.1125   7
   4  -9  -6 147.773 17.8006   1
  -4   9   5 16.7274 5.81175   7
   4  -9  -5 28.7430 6.57610   1
  -4   9   4 68.0964 10.8771   7
   4  -9  -4 68.2951 10.5444   1
  -4   9   3 72.7872 11.3120   7
   4  -9  -3 74.1268 11.2256   1
  -4   9   2 4.16952 5.33963   7
   4  -9  -2 6.46195 4.93123   1
  -4   9   1 1.06565 4.86149   7
   4  -9  -1-2.81460 5.42566   1
  -4   9   0-4.34488 5.29708   7
   4  -9   0 2.87600 4.21456   1
  -4   9  -1-1.10943 4.78172   7
   4  -9   1 2.96245 4.73943   1
  -4   9  -2 5.71957 6.11966   7
   4  -9   2 9.03332 5.44963   1
  -4   9  -3 47.9135 9.54289   7
   4  -9   3 40.7162 8.18771   1
  -4   9  -4-1.18972 6.06678   7
   4  -9   4 2.07954 4.65712   1
  -4   9  -5 18.1264 6.71695   7
   4  -9   5 10.6231 5.93790   1
  -4   9  -6 12.3766 6.51296   7
   4  -9   6 13.0444 5.74927   1
  -4   9  -7 6.29813 6.24783   7
   4  -9   7 2.23058 5.36511   1
  -4   9  -8 56.7637 10.2639   7
   4  -9   8 37.7697 9.11206   1
  -4   9  -9 15.8053 7.20321   7
   4  -9   9 11.7489 6.29032   1
  -4   9 -10-8.08778 6.97157   7
   4  -9  10 7.22833 5.96573   1
  -4   9 -11 30.3507 8.61328   7
   4  -9  11 23.4670 7.93636   1
  -4   9 -12 8.47348 6.67038   7
   4  -9  12-6.34401 6.56496   1
  -4   9 -13 33.3625 8.99266   7
   4  -9  13 15.6367 6.77526   1
  -4   9 -14 13.4180 7.41199   7
   4  -9  14 17.3944 7.69988   1
  -4   9 -15 1.53133 6.98541   7
  -4   9 -16 15.7151 7.68632   7
  -4   9 -17 37.1416 9.97519   7
  -4   9 -18-3.31629 7.15256   7
  -4   9 -19 20.3655 9.67316   7
   4  -8 -23 27.6316 23.2914   2
   4  -8 -22-4.12479 17.0541   2
  -4   8  16 154.295 19.2953   7
  -4   8  15 7.31383 6.14671   7
  -4   8  14 61.6243 10.2595   7
  -4   8  13 16.0607 6.18334   7
   4  -8 -12 3.27094 4.25778   1
  -4   8  12 7.86725 4.89422   7
   4  -8 -11 3.25449 4.26769   1
  -4   8  11-0.97500 4.90187   7
   4  -8 -10-1.61929 4.41351   1
  -4   8  10 2.90299 4.64370   7
  -4   8   9-1.91882 4.82442   7
   4  -8  -9-1.61565 4.00305   1
  -4   8   8-0.95273 4.79648   7
   4  -8  -8 7.27725 4.19108   1
  -4   8   7-4.81101 5.17910   7
   4  -8  -7 2.41674 3.73910   1
  -4   8   6 7.71722 5.29949   7
   4  -8  -6 6.45538 4.39293   1
  -4   8   5 36.6456 7.71247   7
   4  -8  -5 26.8926 6.28012   1
  -4   8   4 54.4985 10.2530   7
   4  -8  -4 80.9933 10.5080   1
  -4   8   3 23.6909 6.52379   7
   4  -8  -3 23.2675 6.01752   1
  -4   8   2 10.0629 5.47147   7
   4  -8  -2 14.2627 5.14303   1
  -4   8   1 46.9576 9.35422   7
   4  -8  -1 61.5908 9.33964   1
  -4   8   0 11.3898 5.72914   7
   4  -8   0 9.64413 4.99481   1
  -4   8  -1 14.8722 6.24906   7
   4  -8   1 3.62063 4.46824   1
  -4   8  -2 9.72170 6.07694   7
   4  -8   2 6.39990 4.78321   1
  -4   8  -3 56.6800 10.5980   7
   4  -8   3 70.8825 10.5533   1
   4  -8   4 13.3500 5.55399   1
  -4   8  -4 8.82781 5.88165   7
   4  -8   5 2.92655 4.97560   1
  -4   8  -5-1.12385 5.56565   7
   4  -8   6 1.00071 5.45495   1
  -4   8  -6-1.14087 5.01390   7
   4  -8   7 5.13479 5.29189   1
  -4   8  -7 11.6520 5.81945   7
   4  -8   8 17.8942 6.66981   1
  -4   8  -8 26.1415 7.38254   7
   4  -8   9-2.15566 5.57834   1
  -4   8  -9 8.49483 5.92100   7
   4  -8  10 48.6119 9.68326   1
  -4   8 -10 53.3826 10.4358   7
   4  -8  11 22.6738 7.02327   1
  -4   8 -11 16.5813 7.36588   7
  -4   8 -12 9.17844 6.74193   7
  -4   8 -13 13.4662 7.07926   7
  -4   8 -14 2.77111 6.65414   7
   4  -8  15 21.3288 7.52906   1
   4  -8  16 34.7354 8.94738   1
  -4   8 -16 32.0028 9.15729   7
   4  -8  17 3.95606 5.23148   1
  -4   8 -17 7.44940 7.05049   7
   4  -8  18 29.7639 8.92966   1
  -4   8 -18 58.0216 11.1944   7
   4  -8  19 2.77403 5.60785   1
  -4   8 -19-1.57282 7.04443   7
   4  -8  20 19.9199 7.83638   1
  -4   8 -20 24.3098 8.85452   7
  -4   8 -21 3.33576 6.74997   7
   4  -7 -25 15.1457 22.6554   2
   4  -7 -24 68.5451 13.8952   7
   4  -7 -24 75.3241 26.1777   2
   4  -7 -23 13.2291 8.35480   7
   4  -7 -23-3.91583 16.8969   2
   4  -7 -22 3.26593 7.71501   7
   4  -7 -21 8.08875 7.67521   7
   4  -7 -20 3.20894 7.19203   7
   4  -7 -19 24.0438 9.44186   7
  -4   7  17 61.7608 10.8381   7
  -4   7  16 38.7937 8.64288   7
  -4   7  15 6.29131 5.30310   7
   4  -7 -14-1.57212 4.54662   1
  -4   7  14-1.02791 5.53421   7
   4  -7 -13-1.53847 4.08705   1
  -4   7  13 3.00554 4.65004   7
   4  -7 -12 0.75505 4.16997   1
  -4   7  12 2.94052 4.39258   7
   4  -7 -11 46.4780 8.13828   1
  -4   7  11 61.8936 9.62143   7
   4  -7 -10 56.9587 9.14197   1
  -4   7  10 71.7055 10.4832   7
  -4   7   9-0.94437 4.67636   7
   4  -7  -9-0.73745 3.97010   1
  -4   7   8 74.0638 10.7454   7
   4  -7  -8 61.7895 9.46391   1
  -4   7   7 14.1754 5.63598   7
   4  -7  -7 10.2631 4.60514   1
  -4   7   6 13.1091 5.54512   7
   4  -7  -6 12.4323 4.39515   1
  -4   7   5 21.5569 6.37603   7
   4  -7  -5 24.3183 5.81450   1
  -4   7   4-0.93626 4.64494   7
   4  -7  -4 7.47300 4.51822   1
  -4   7   3 109.572 14.2640   7
   4  -7  -3 103.251 13.2433   1
  -4   7   2 118.011 15.6507   7
   4  -7  -2 126.187 14.9913   1
   4  -7  -1 81.4379 11.8040   1
  -4   7   1 107.370 13.2316   7
   4  -7   0 38.3330 7.15627   1
  -4   7   0 37.3058 8.02410   7
   4  -7   1 45.9431 8.26341   1
  -4   7  -1 58.5736 9.48209   7
   4  -7   2 39.0993 7.90158   1
  -4   7  -2 59.9653 9.46110   7
   4  -7   3 10.2069 4.88754   1
  -4   7  -3 15.0698 5.98376   7
   4  -7   4 6.09230 4.86324   1
  -4   7  -4-5.08445 5.47505   7
   4  -7   5 33.9096 7.10830   1
  -4   7  -5 31.9351 7.33888   7
   4  -7   6 0.91592 4.53492   1
  -4   7  -6-2.09179 5.55690   7
   4  -7   7 21.5982 6.33994   1
  -4   7  -7 18.1045 6.23677   7
   4  -7   8 17.2915 6.07147   1
  -4   7  -8 11.9395 6.00268   7
   4  -7   9 87.6371 12.7348   1
  -4   7  -9 95.6353 13.6183   7
  -4   7 -10 73.1259 11.9111   7
  -4   7 -11 51.6257 9.97506   7
  -4   7 -12-4.83005 6.26113   7
   4  -7  13-1.08372 5.37853   1
  -4   7 -13-6.16653 5.83400   7
   4  -7  14 4.43865 5.20075   1
  -4   7 -14 12.6471 6.48905   7
   4  -7  15 3.41207 5.09477   1
  -4   7 -15-1.30001 5.49019   7
   4  -7  16 15.1565 6.92418   1
  -4   7 -16 10.7522 6.86440   7
   4  -7  17 23.8946 7.49851   1
  -4   7 -17 13.8822 7.59022   7
   4  -7  18 91.7580 14.6667   1
  -4   7 -18 115.858 16.1709   7
   4  -7  19-1.25222 5.91152   1
  -4   7 -19 1.47485 6.72639   7
   4  -7  20 21.8024 7.11548   1
  -4   7 -20 6.08263 7.18135   7
   4  -7  21 6.56014 5.82986   1
  -4   7 -21 14.0999 8.14722   7
   4  -7  22 17.4497 8.04254   1
  -4   7 -22 29.0466 9.36127   7
  -4   7 -23 8.30293 7.45800   7
   4  -7  23 4.11741 6.50326   1
   4  -6 -27 10.6876 8.04116   7
   4  -6 -26 15.8054 8.28689   7
   4  -6 -25 23.8406 9.58208   7
   4  -6 -25 4.41863 18.3597   2
   4  -6 -24 19.9111 8.68160   7
   4  -6 -24-3.75148 14.8758   2
   4  -6 -23-8.18243 8.35569   7
   4  -6 -23 10.1302 14.2644   2
   4  -6 -22-3.21754 7.21130   7
   4  -6 -21 9.53804 7.43324   7
   4  -6 -20 9.43211 7.59632   7
   4  -6 -19 14.1138 8.10683   7
  -4   6  17-1.12432 5.12877   7
   4  -6 -16 41.0033 7.56112   1
  -4   6  16 42.9202 8.78526   7
   4  -6 -15 23.7436 5.71562   1
  -4   6  15 5.20108 5.39043   7
   4  -6 -14 14.1732 5.30144   1
  -4   6  14 33.3833 7.39262   7
   4  -6 -13 15.1968 4.91428   1
  -4   6  13 2.96681 5.26212   7
   4  -6 -12-2.83384 4.23485   1
  -4   6  12-0.96087 4.97272   7
   4  -6 -11 87.8746 11.5918   1
  -4   6  11 98.4511 12.9185   7
   4  -6 -10 10.2724 4.45452   1
  -4   6  10 19.5912 5.49306   7
   4  -6  -9-1.34804 3.43712   1
  -4   6   9 3.67537 4.54957   7
   4  -6  -8 26.1627 5.79756   1
  -4   6   8 31.7842 6.90179   7
   4  -6  -7 36.0868 6.37051   1
  -4   6   7 33.7151 7.61150   7
  -4   6   6 3.59382 4.51536   7
   4  -6  -6-1.32930 3.29087   1
  -4   6   5 7.18351 4.72059   7
   4  -6  -5 1.99639 3.31336   1
  -4   6   4 2.67110 4.66791   7
   4  -6  -4-1.34396 3.92815   1
  -4   6   3 348.252 36.6389   7
   4  -6  -3 345.079 35.6020   1
   4  -6  -2 86.4867 10.8192   1
  -4   6   2 73.2151 11.3808   7
   4  -6  -1-0.69861 3.35250   1
  -4   6   1 0.90532 4.48244   7
   4  -6   0 4.31231 3.98838   1
  -4   6   0 4.57623 4.88064   7
   4  -6   1 4.46281 3.71129   1
  -4   6  -1 5.51073 4.70572   7
   4  -6   2 17.3207 5.23644   1
  -4   6  -2 7.31281 4.98874   7
   4  -6   3 1.54182 3.94340   1
  -4   6  -3 6.44579 5.21379   7
   4  -6   4 14.9998 4.95092   1
  -4   6  -4 9.27107 5.30844   7
   4  -6   5 51.0837 8.50950   1
  -4   6  -5 59.0334 9.44020   7
   4  -6   6 128.239 16.1629   1
  -4   6  -6 140.673 16.7654   7
   4  -6   7 0.85274 4.09212   1
  -4   6  -7-0.96678 4.92959   7
  -4   6  -8 378.600 40.0212   7
  -4   6  -9 88.3665 12.8089   7
  -4   6 -10 114.841 15.5231   7
   4  -6  11 113.260 14.4886   1
  -4   6 -11 100.197 14.5174   7
   4  -6  12 28.7066 6.82049   1
  -4   6 -12 13.0998 6.32165   7
   4  -6  13 3.91656 5.07883   1
  -4   6 -13 4.50849 5.76074   7
   4  -6  14 95.3012 13.8909   1
  -4   6 -14 107.389 14.8356   7
   4  -6  15 13.3401 6.01247   1
  -4   6 -15 7.23448 6.04886   7
   4  -6  16 46.1965 9.07175   1
  -4   6 -16 33.6581 9.20588   7
  -4   6 -17 32.2497 8.08243   7
   4  -6  17 21.4762 6.86332   1
  -4   6 -18-8.00973 6.99941   7
   4  -6  18 6.58907 5.51992   1
  -4   6 -19 1.38042 6.46012   7
   4  -6  19 16.8424 6.54420   1
  -4   6 -20-1.42682 7.58664   7
   4  -6  20 6.89069 5.42982   1
  -4   6 -21 5.89065 6.71995   7
   4  -6  21-5.86763 5.81450   1
  -4   6 -22-1.52059 7.53127   7
   4  -6  22 4.79967 5.47597   1
  -4   6 -23 15.6773 7.42707   7
   4  -6  23 1.22594 6.45735   1
  -4   6 -24 3.23062 6.38000   7
   4  -6  24-2.50550 5.91399   1
   4  -6  25 11.5221 6.61822   1
   4  -5 -28 1.70034 6.71771   7
   4  -5 -27 1.70965 7.65839   7
   4  -5 -26 3.50569 7.09382   7
   4  -5 -25 8.38687 7.69096   7
   4  -5 -24-6.53719 15.4550   2
   4  -5 -24 13.0427 7.61739   7
   4  -5 -23 3.19364 7.41765   7
   4  -5 -22 18.7952 8.50928   7
   4  -5 -21 4.62764 6.92215   7
   4  -5 -20 34.9923 10.4382   7
   4  -5 -19 6.02926 7.48472   7
   4  -5 -18 4.06372 4.20320   1
   4  -5 -18-5.97439 7.39519   7
   4  -5 -17 42.9468 7.91757   1
   4  -5 -16 73.9301 10.3704   1
  -4   5  16 72.2297 11.5147   7
   4  -5 -15 5.14785 4.22377   1
  -4   5  15 3.05182 4.97622   7
   4  -5 -14 54.7689 8.91657   1
  -4   5  14 81.7688 11.1141   7
   4  -5 -13 1.38054 3.68166   1
  -4   5  13 7.70577 5.32563   7
   4  -5 -12 134.675 15.5592   1
  -4   5  12 130.803 16.5122   7
   4  -5 -11 41.6191 6.98226   1
  -4   5  11 34.6995 7.52415   7
   4  -5 -10 136.745 15.6977   1
  -4   5  10 136.513 16.7025   7
   4  -5  -9 29.3860 5.64541   1
  -4   5   9 28.2184 6.66689   7
   4  -5  -8 109.417 13.4127   1
  -4   5   8 122.032 14.7465   7
  -4   5   7 93.4784 12.3783   7
   4  -5  -7 85.3492 10.8656   1
  -4   5   6 230.329 24.1448   7
   4  -5  -6 205.118 22.8019   1
  -4   5   5 47.5154 8.09810   7
   4  -5  -5 42.1597 6.82268   1
  -4   5   4-4.20072 4.75370   7
   4  -5  -4-1.20898 3.21963   1
   4  -5  -3 324.314 34.6344   1
  -4   5   3 363.241 35.8411   7
   4  -5  -2 189.787 21.2616   1
  -4   5   2 208.839 22.3703   7
  -4   5   1 174.240 20.3902   7
   4  -5  -1 181.252 19.6326   1
  -4   5   0 209.954 21.1864   7
   4  -5   0 165.163 19.7097   1
   4  -5   1 6.64910 3.59706   1
  -4   5  -1 0.83667 4.22028   7
   4  -5   2 10.8238 4.34403   1
  -4   5  -2 12.5089 4.94369   7
   4  -5   3 53.3409 8.46977   1
  -4   5  -3 70.8867 9.58843   7
   4  -5   4 80.3084 10.6619   1
  -4   5  -4 82.2797 11.3837   7
   4  -5   5-2.92240 3.88378   1
  -4   5  -5 1.69470 4.79072   7
  -4   5  -6 13.7315 5.12900   7
  -4   5  -7 1.75663 4.14964   7
  -4   5  -8 71.9095 10.5094   7
   4  -5   9 2.41674 4.03550   1
  -4   5  -9 14.7373 5.53421   7
   4  -5  10 24.7224 6.27807   1
  -4   5 -10 38.4931 7.47905   7
   4  -5  11 79.1265 11.1771   1
  -4   5 -11 78.3301 11.6334   7
   4  -5  12 24.9461 6.23752   1
  -4   5 -12 24.0429 6.58765   7
   4  -5  13 9.68321 4.62788   1
  -4   5 -13 15.5442 5.82896   7
   4  -5  14 5.39790 4.42074   1
  -4   5 -14 6.45022 5.35110   7
  -4   5 -15 5.58149 5.37827   7
   4  -5  15 4.59639 5.15711   1
  -4   5 -16 75.2756 11.7390   7
   4  -5  16 63.8391 10.5932   1
  -4   5 -17 13.2221 6.62367   7
   4  -5  17 16.2988 5.66214   1
  -4   5 -18 19.9676 6.89812   7
   4  -5  18 7.83805 5.12483   1
  -4   5 -19 10.3475 7.11547   7
   4  -5  19 10.0245 5.34223   1
  -4   5 -20 2.68116 6.00652   7
   4  -5  20-4.09498 4.67249   1
  -4   5 -21 34.6878 8.96484   7
   4  -5  21 29.3315 7.54702   1
  -4   5 -22 22.9393 7.83727   7
   4  -5  22 17.1272 6.58827   1
  -4   5 -23 22.1880 8.31140   7
   4  -5  23 20.7874 6.63907   1
  -4   5 -24 19.8270 8.59904   7
   4  -5  24 17.8850 6.76718   1
  -4   5 -25 180.651 20.4331   7
   4  -5  25 103.995 17.0425   1
  -4   5 -26 8.07860 6.86532   7
   4  -5  26 8.16188 5.64784   1
   4  -5  27 10.7292 6.07647   1
   4  -5  28 2.43296 6.20709   1
   4  -4 -28 8.28102 8.11282   7
   4  -4 -27 3.28415 7.36059   7
   4  -4 -26-3.37024 7.69191   7
   4  -4 -25 3.33330 8.25788   7
   4  -4 -24 28.6676 9.79320   7
   4  -4 -23 10.8036 7.35712   7
   4  -4 -22 48.4548 11.2512   7
   4  -4 -21-1.47929 6.62646   7
   4  -4 -20 39.2585 10.0078   7
   4  -4 -19 12.8896 7.08826   7
   4  -4 -18-1.41522 6.56998   7
   4  -4 -17 172.393 20.0857   1
   4  -4 -17 186.920 22.8852   7
   4  -4 -16 8.82727 4.56559   1
  -4   4  16 3.11992 4.94440   7
  -4   4  15-0.98674 4.50807   7
   4  -4 -15 7.05852 4.22328   1
  -4   4  14 67.5073 10.6966   7
   4  -4 -14 71.9216 9.71800   1
   4  -4 -13 340.997 34.5122   1
  -4   4  13 325.950 35.3895   7
  -4   4  12 8.03147 4.92550   7
   4  -4 -12 8.28380 4.25349   1
   4  -4 -11 224.639 25.0981   1
  -4   4  11 259.799 26.5362   7
  -4   4  10 28.0047 6.11442   7
   4  -4 -10 23.8574 5.19260   1
   4  -4  -9 181.267 20.6949   1
  -4   4   9 217.195 22.2427   7
  -4   4   8 25.2022 5.48831   7
   4  -4  -8 22.8441 4.84725   1
  -4   4   7 2.43127 4.14240   7
   4  -4  -7 3.35196 2.90337   1
  -4   4   6-0.80005 4.25111   7
   4  -4  -6-0.55312 3.16284   1
   4  -4  -5 455.606 45.5851   1
  -4   4   5 459.919 46.5075   7
   4  -4  -4 9.80189 3.63563   1
  -4   4   4 10.1306 4.40200   7
  -4   4   3 218.722 20.8764   7
   4  -4  -3 200.970 19.4461   1
   4  -4  -3 158.596 18.0080   8
   4  -4  -2 8.77143 3.24754   8
   4  -4  -2 12.7282 3.86714   1
  -4   4   2 13.1946 4.65429   7
  -4   4   1 373.399 35.2348   7
   4  -4  -1 338.598 34.0584   1
   4  -4  -1 314.998 33.2842   8
   4  -4   0 22.0805 4.62762   1
  -4   4   0 16.9424 5.35428   7
  -4   4  -1 147.076 17.8911   7
   4  -4   1 163.282 17.4312   1
  -4   4  -2 18.8740 5.33217   7
   4  -4   2 22.3937 4.87228   1
  -4   4  -3 2.26014 4.06068   7
  -4   4  -4 160.830 18.3605   7
  -4   4  -5 11.4102 4.23410   7
  -4   4  -6 3.10028 3.96294   7
   4  -4   7 6.18900 4.01023   1
  -4   4  -7 4.75075 4.40098   7
   4  -4   8 1.40870 3.88978   1
  -4   4  -8 1.61661 3.94355   7
   4  -4   9 34.5998 6.38357   1
  -4   4  -9 30.4262 6.52991   7
   4  -4  10-1.47410 3.76356   1
  -4   4 -10-2.56060 4.65697   7
  -4   4 -11 146.539 17.1032   7
   4  -4  11 134.614 16.4047   1
  -4   4 -12 449.296 43.7702   7
   4  -4  12 398.359 42.8253   1
  -4   4 -13 196.559 22.1041   7
   4  -4  13 183.031 21.1468   1
  -4   4 -14 5.96137 4.92969   7
   4  -4  14 1.60395 4.10177   1
  -4   4 -15-1.03485 5.21219   7
   4  -4  15 7.36676 4.06734   1
  -4   4 -16-1.07828 4.64696   7
   4  -4  16 1.67064 4.31988   1
  -4   4 -17 26.9263 7.66724   7
   4  -4  17 40.9802 7.88318   1
  -4   4 -18 39.6082 8.43922   7
   4  -4  18 31.4070 7.09298   1
  -4   4 -19 6.03867 5.84796   7
   4  -4  19 9.80926 4.92321   1
   4  -4  20 6.37372 4.70603   1
  -4   4 -20 11.2641 6.24423   7
   4  -4  21 122.822 15.6103   1
  -4   4 -21 122.976 17.0832   7
   4  -4  22 21.8654 5.83710   1
  -4   4 -22 18.7255 7.81059   7
   4  -4  23 13.6034 5.60501   1
  -4   4 -23 26.2434 8.57444   7
   4  -4  24 10.9275 5.31350   1
  -4   4 -24 1.42491 5.66121   7
   4  -4  25 61.9802 10.9474   1
  -4   4 -25 94.0649 14.0081   7
   4  -4  26 6.23493 5.33134   1
   4  -4  27-6.38255 5.75739   1
   4  -4  28 28.2620 7.38497   1
   4  -3 -29 16.7601 9.71208   7
   4  -3 -28-4.82931 7.08932   7
   4  -3 -27-1.57875 7.20171   7
   4  -3 -26 4.66364 7.93889   7
   4  -3 -25 3.18138 7.26086   7
   4  -3 -24 6.21872 7.36278   7
   4  -3 -23 14.9424 7.74899   7
   4  -3 -22 38.9655 9.37211   7
   4  -3 -21 5.64638 6.68515   7
   4  -3 -20 35.7818 9.71883   7
   4  -3 -19 1.34843 6.47210   7
   4  -3 -18 207.725 25.3361   7
   4  -3 -17 64.1428 11.7735   7
   4  -3 -16 17.3484 5.17261   1
   4  -3 -15 6.24306 3.79687   1
  -4   3  15 9.64244 5.61750   7
   4  -3 -14 11.2147 4.30787   1
  -4   3  14 10.9154 5.24690   7
   4  -3 -13 1.27823 3.31195   1
  -4   3  13 4.37132 4.58843   7
   4  -3 -12 33.3464 6.10933   1
  -4   3  12 48.3693 8.11908   7
   4  -3 -11 5.34964 3.59248   1
  -4   3  11 6.51475 4.00896   7
   4  -3 -10 64.0375 8.60241   1
  -4   3  10 61.8252 9.54827   7
   4  -3  -9 188.683 20.6304   1
  -4   3   9 202.927 21.8041   7
   4  -3  -8 2.67392 2.86891   1
  -4   3   8 7.57776 4.25125   7
   4  -3  -7 210.680 24.3822   1
  -4   3   7 286.009 26.0328   7
   4  -3  -6 7.12200 3.23716   1
  -4   3   6 3.70488 3.81647   7
   4  -3  -5 36.5908 5.70561   1
  -4   3   5 33.9355 6.53040   7
   4  -3  -4 20.3463 4.61612   1
  -4   3   4 25.7323 5.67312   7
   4  -3  -3 48.9393 5.56529   8
  -4   3   3 72.2001 8.78435   7
   4  -3  -3 59.3891 7.38143   1
  -4   3   2 24.0823 5.37864   7
   4  -3  -2 19.1160 4.45463   1
  -4   3   1 6.32523 4.02001   7
   4  -3  -1 11.4117 3.60588   1
  -4   3   0 43.9821 7.31695   7
   4  -3   0 38.0356 6.04791   1
  -4   3  -1 66.3783 9.34843   7
  -4   3  -2 320.721 33.2464   7
  -4   3  -3 5.40287 4.14754   7
  -4   3  -4 674.914 65.1602   7
   4  -3   4 646.965 64.6466   1
  -4   3  -5 122.099 14.6034   7
   4  -3   5 125.412 14.1961   1
   4  -3   6 42.5174 6.77433   1
  -4   3  -6 43.0746 7.02483   7
   4  -3   7 45.0276 6.96682   1
  -4   3  -7 40.3293 7.16330   7
   4  -3   8 42.4048 6.74051   1
  -4   3  -8 44.5968 7.17126   7
   4  -3   9 2.55622 3.45250   1
  -4   3  -9 3.73317 3.47813   7
  -4   3 -10 173.274 20.3024   7
   4  -3  10 188.281 20.0884   1
   4  -3  11 6.67133 3.79990   1
  -4   3 -11 3.22301 3.89533   7
  -4   3 -12 487.747 50.5278   7
   4  -3  12 506.726 50.0070   1
  -4   3 -13 172.337 20.2828   7
   4  -3  13 177.658 19.5857   1
   4  -3  14 280.710 29.5696   1
   4  -3  15 13.7701 4.51928   1
   4  -3  16 10.3669 4.39210   1
   4  -3  17 308.616 32.4024   1
   4  -3  18 109.726 13.9009   1
   4  -3  19 3.94404 3.86393   1
   4  -3  20 6.44436 4.03467   1
   4  -3  21 83.9365 11.5284   1
   4  -3  22 17.6685 5.63139   1
   4  -3  23 30.1152 6.86697   1
   4  -3  24 2.64196 4.56100   1
   4  -3  25-2.70479 4.66272   1
  -4   3 -25 9.52774 6.09591   7
   4  -3  26 17.5478 5.54448   1
  -4   3 -26 12.6214 7.30481   7
  -4   3 -27 47.7324 10.8040   7
  -4   3 -28 2.98564 6.81413   7
   4  -2 -29 3.29470 7.38424   7
   4  -2 -28 7.91551 6.86321   7
   4  -2 -27 27.3392 9.33939   7
   4  -2 -26 25.1861 8.70534   7
   4  -2 -25 18.9077 8.50522   7
   4  -2 -24 1.48334 6.39391   7
   4  -2 -23 34.9838 9.05364   7
   4  -2 -22 2.76917 6.43177   7
   4  -2 -21 45.3288 10.0772   7
   4  -2 -20-2.59895 6.53532   7
   4  -2 -19 10.0904 6.31738   7
   4  -2 -18 6.16070 5.44624   7
   4  -2 -17 26.5346 8.10736   7
   4  -2 -16 177.273 21.7568   7
   4  -2 -15 129.965 17.1183   7
   4  -2 -14 112.688 13.2797   1
  -4   2  14 105.285 14.0666   7
   4  -2 -13 14.4314 4.14284   1
  -4   2  13 21.6378 5.59928   7
   4  -2 -12 14.3073 4.10482   1
  -4   2  12 23.0525 5.83470   7
  -4   2  11 57.1324 10.6047   8
  -4   2  11 86.0348 10.9033   7
   4  -2 -11 87.7183 10.0901   1
   4  -2 -10 29.9852 5.41883   1
  -4   2  10 30.7671 6.14668   7
  -4   2  10 17.1683 7.20604   8
  -4   2   9 175.254 22.1426   8
  -4   2   9 234.548 23.1495   7
   4  -2  -9 228.408 22.2651   1
  -4   2   8 24.3033 5.76592   7
  -4   2   8 31.8456 3.72346   8
   4  -2  -8 32.7081 5.41222   1
   4  -2  -7 134.264 14.4940   1
  -4   2   7 123.763 15.1185   7
   4  -2  -6 137.936 14.9597   1
  -4   2   6 132.650 15.5469   7
   4  -2  -5 181.776 19.2550   8
   4  -2  -5 206.048 20.5618   1
  -4   2   5 226.692 21.6446   7
   4  -2  -4 75.8727 10.3955   8
  -4   2   4 102.965 11.7323   7
   4  -2  -4 104.090 11.0330   1
   4  -2  -3 43.7323 5.82093   1
  -4   2   3 27.5448 5.99504   7
   4  -2  -3 33.7478 7.13212   8
   4  -2  -2 36.3468 4.25343   8
   4  -2  -2 33.1028 5.57283   1
  -4   2   2 38.3466 6.65509   7
  -4   2   1 167.671 18.6266   7
  -4   2   0 395.798 40.0670   7
  -4   2  -1 242.546 25.6096   7
   4  -2   2 639.020 62.3330   1
   4  -2   3 1882.89 179.930   1
   4  -2   4 43.5958 6.47423   1
   4  -2   5 3.96273 2.88833   1
   4  -2   6 182.964 19.5078   1
   4  -2   7 390.600 39.1564   1
   4  -2   8 41.4281 6.50168   1
   4  -2   9 179.050 19.3400   1
   4  -2  10 5.73584 3.09535   1
   4  -2  11 99.7672 12.0207   1
   4  -2  12 95.3275 11.5689   1
   4  -2  13 206.683 22.1677   1
   4  -2  14 714.828 70.7552   1
  -4   2 -14 729.038 71.6696   7
   4  -2  15 175.662 18.8478   1
  -4   2 -15 160.312 19.5227   7
   4  -2  16 0.65276 3.42221   1
  -4   2 -16-0.91660 4.60652   7
   4  -2  17 66.0097 9.25626   1
  -4   2 -17 63.7529 9.94976   7
   4  -2  18 657.708 69.6838   1
  -4   2 -18 795.397 71.5369   7
   4  -2  19 3.48006 3.85691   1
  -4   2 -19 4.09465 5.15634   7
   4  -2  20 69.0042 10.0724   1
  -4   2 -20 83.8079 11.7555   7
   4  -2  21 18.1828 4.73351   1
  -4   2 -21 16.4694 6.13871   7
   4  -2  22 140.029 17.0073   1
  -4   2 -22 155.761 18.8548   7
  -4   2 -23 16.4610 7.10716   7
   4  -2  23 20.5908 5.40306   1
  -4   2 -24 24.3293 7.61967   7
   4  -2  24 20.3184 5.60493   1
  -4   2 -25 3.77133 5.98177   7
   4  -2  25 10.4164 4.64199   1
  -4   2 -26 15.5910 7.14689   7
  -4   2 -27 61.7014 11.4717   7
  -4   2 -28 12.4691 6.85700   7
  -4   2 -29 1.42956 6.16209   7
   4  -1 -29 74.8172 14.5320   7
   4  -1 -28 31.1995 9.19929   7
   4  -1 -27 1.48550 6.65432   7
   4  -1 -26-9.97680 7.82622   7
   4  -1 -25-1.37222 6.58629   7
   4  -1 -24-1.34179 6.44023   7
   4  -1 -23 30.6444 8.84796   7
   4  -1 -22 102.513 15.4455   7
   4  -1 -21 142.239 18.8492   7
   4  -1 -20 18.3991 6.74520   7
   4  -1 -19-2.36274 6.19756   7
   4  -1 -18 57.3294 10.1785   7
   4  -1 -17 54.5731 9.68962   7
   4  -1 -16 37.9593 8.45129   7
   4  -1 -15 344.801 37.0764   7
   4  -1 -12 25.6386 5.06602   1
  -4   1  12 12.8835 4.86784   7
  -4   1  11 30.8187 7.45947   8
   4  -1 -11 42.7383 6.44766   1
   4  -1 -10 18.3508 4.44786   1
  -4   1  10 17.2167 6.70755   8
  -4   1   9 25.6804 8.19669   8
   4  -1  -9 26.1042 4.92640   1
  -4   1   8 3.22160 7.46756   8
   4  -1  -8 3.00597 2.81305   1
   4  -1  -7 178.582 19.0130   1
  -4   1   7 179.141 20.6367   8
  -4   1   6 26.6891 4.41423   8
   4  -1  -6 37.0668 5.76255   8
   4  -1  -6 26.5568 4.97459   1
  -4   1   5 16.9138 2.66774   8
   4  -1  -5 15.0993 4.76309   8
   4  -1  -5 17.9946 3.99994   1
   4  -1  -4 75.4024 10.6506   8
   4  -1  -4 67.6526 8.56607   1
   4  -1  -3 3.81761 7.50282   8
   4  -1  -2-1.96605 3.93298   8
   4  -1  -1 10.5132 2.55463   8
   4  -1   0 280.048 27.7584   1
   4  -1   0 272.604 27.0104   8
  -4   1  -1 583.236 58.7616   7
   4  -1   1 607.669 58.1496   1
  -4   1  -2 1059.86 105.225   7
   4  -1   2 1112.09 104.683   1
   4  -1   3 9.06137 3.51853   1
  -4   1  -3 9.07044 3.96856   7
   4  -1   4 165.860 17.2963   1
  -4   1  -4 161.651 17.8349   7
   4  -1   5 1199.71 113.837   1
  -4   1  -5 1167.62 114.254   7
  -4   1  -6 160.646 17.3750   7
   4  -1   6 157.256 16.9098   1
  -4   1  -7 33.4196 5.96225   7
   4  -1   7 41.6635 5.78411   1
  -4   1  -8 10.9842 3.96721   7
   4  -1   8 15.7867 4.05968   1
  -4   1  -9 37.4521 6.28475   7
   4  -1   9 35.6091 5.74518   1
  -4   1 -10 15.8565 4.58028   7
   4  -1  10 20.8005 4.36832   1
  -4   1 -11 540.367 53.2692   7
   4  -1  11 528.448 52.6044   1
  -4   1 -12-0.70299 3.58736   7
   4  -1  12 2.60929 2.54831   1
   4  -1  13 177.323 19.8139   1
  -4   1 -13 198.837 20.7890   7
   4  -1  14 112.159 13.2201   1
  -4   1 -14 119.266 14.1921   7
   4  -1  15 5.59472 3.27615   1
  -4   1 -15-1.60212 3.97088   7
   4  -1  16-1.14343 3.27007   1
  -4   1 -16-0.83406 4.37382   7
  -4   1 -17 582.876 58.6569   7
   4  -1  18 105.389 13.2672   1
  -4   1 -18 130.749 15.0917   7
   4  -1  19 87.6858 11.2767   1
  -4   1 -19 100.250 12.8856   7
   4  -1  20 182.643 20.4182   1
  -4   1 -20 195.609 21.9528   7
   4  -1  21 25.0773 5.55860   1
  -4   1 -21 41.4116 7.57824   7
   4  -1  22 27.0159 5.95862   1
  -4   1 -22 50.2651 8.71831   7
   4  -1  23 6.76032 3.65646   1
  -4   1 -23-1.08508 4.68989   7
  -4   1 -24 17.9791 6.35683   7
  -4   1 -25 67.4904 11.4122   7
  -4   1 -26 18.0609 7.38984   7
  -4   1 -27-2.49170 5.26571   7
  -4   1 -28 64.4739 11.7663   7
  -4   1 -29 3.99961 5.87133   7
  -4   1 -30 8.27010 6.86910   7
   4   0 -29 101.496 16.4172   7
   4   0 -28-4.51539 8.21566   7
   4   0 -27 17.9068 7.79499   7
   4   0 -26 15.3977 7.86113   7
   4   0 -14 84.5182 12.0182   7
   4   0 -13 42.2359 8.12693   7
  -4   0  11 11.8442 4.22388   7
  -4   0  10 65.9280 9.05499   7
  -4   0   9 84.2589 11.0943   7
   4   0  -9 95.6789 10.9399   1
  -4   0   8 81.0231 9.86151   7
  -4   0   8 60.6951 13.1893   8
   4   0  -8 67.0309 10.1348   8
   4   0  -8 82.8776 9.54383   1
  -4   0   7 261.286 26.5163   7
  -4   0   7 231.481 30.2137   8
   4   0  -7 268.288 27.1901   8
   4   0  -7 247.436 26.0149   1
  -4   0   6 185.238 18.9851   7
  -4   0   6 126.423 21.8664   8
   4   0  -6 195.946 20.1486   8
   4   0  -6 171.446 18.4404   1
   4   0  -5 245.296 24.9924   8
  -4   0   5 199.240 24.1877   8
  -4   0   5 220.386 23.0518   7
  -4   0   4 10.6391 3.43886   8
  -4   0   4 8.59421 3.49559   7
   4   0  -4 9.50948 7.29558   8
   4   0  -3 88.6836 15.0239   8
  -4   0   3 95.4697 9.49099   8
  -4   0   3 70.7119 10.2771   7
   4   0  -2 4.50261 2.81667   1
   4   0  -2-3.52673 8.60265   8
  -4   0   2 0.97566 3.24345   7
  -4   0   2 3.75113 2.13297   8
   4   0  -1 43.6247 7.41242   8
  -4   0   1 43.4645 6.54345   7
   4   0  -1 43.5607 5.88768   1
   4   0   0 195.938 20.9445   1
   4   0   0 228.965 20.9682   8
  -4   0   0 189.460 21.4928   7
   4   0   1 93.1470 9.81196   1
   4   0   1 82.0211 9.45676   8
  -4   0  -1 83.3177 10.3571   7
  -4   0  -2 2.84412 3.01706   7
   4   0   2 3.37564 2.50370   1
  -4   0  -3 51.1236 6.84368   7
   4   0   3 42.3726 5.90386   1
  -4   0  -4 1881.00 181.310   7
   4   0   4 1909.06 180.783   1
  -4   0  -5 969.132 93.4134   7
   4   0   5 965.614 92.8630   1
   4   0   6 10.9031 3.17395   1
  -4   0  -6 15.3350 3.79494   7
   4   0   7 686.758 64.4003   1
  -4   0  -7 636.328 64.7972   7
   4   0   8 814.881 78.7605   1
  -4   0  -8 818.003 79.2851   7
  -4   0  -9 48.5656 7.15672   7
   4   0   9 51.3467 6.73792   1
  -4   0 -10 2.28416 3.41928   7
   4   0  10 2.90276 2.56496   1
   4   0  11 40.0707 6.28973   1
  -4   0 -11 59.1302 7.50625   7
   4   0  12 96.6135 10.4682   1
  -4   0 -12 77.4439 10.7259   7
   4   0  13 46.8186 6.44306   1
  -4   0 -13 44.5023 7.22826   7
   4   0  14 4.71642 2.84231   1
  -4   0 -14 8.33482 4.01006   7
  -4   0 -15 198.744 22.5364   7
   4   0  15 214.252 21.8088   1
   4   0  16 93.0072 10.7172   1
  -4   0 -16 83.3369 11.4958   7
  -4   0 -17 170.071 19.0725   7
   4   0  17 162.836 17.8816   1
   4   0  18 57.5539 8.23102   1
  -4   0 -18 72.5461 9.81322   7
   4   0  19 26.3432 5.17341   1
  -4   0 -19 33.4671 6.55724   7
  -4   0 -20 171.386 19.4255   7
   4   0  20 159.116 17.9057   1
  -4   0 -21 20.3706 6.27109   7
   4   0  21 14.7721 4.09567   1
  -4   0 -22 206.360 23.5624   7
  -4   0 -23 5.97858 5.25444   7
  -4   0 -24 75.4871 11.6249   7
  -4   0 -25-1.07270 5.14867   7
  -4   0 -26 48.9588 9.36204   7
  -4   0 -27-1.15353 4.87186   7
  -4   0 -28 16.7715 6.64016   7
  -4   0 -29-11.1749 7.17688   7
  -4   0 -30 51.5760 10.2008   7
  -4   0 -31 40.0902 9.34506   7
   4   1 -27 29.3885 8.55506   7
   4   1 -26 19.0557 7.17039   7
   4   1 -25 16.1418 7.30795   7
   4   1 -24 21.3900 7.31330   7
   4   1 -23 9.57667 6.42428   7
   4   1 -22 17.0595 6.62704   7
   4   1 -21 103.962 14.5695   7
   4   1 -20 6.40140 4.54533   7
   4   1 -19 288.001 31.8273   7
   4   1 -18 6.29675 5.38421   7
   4   1 -17 173.164 20.5762   7
   4   1 -16 35.5388 7.22663   7
   4   1 -15-0.89586 4.29989   7
   4   1 -14 73.0381 10.4983   7
   4   1 -13 296.426 31.4760   7
   4   1 -12 22.3289 5.72729   7
   4   1 -11 0.77291 3.76910   7
  -4  -1   9 64.5094 8.39565   7
   4   1  -9 55.5082 9.93689   8
  -4  -1   8 43.6854 6.40291   7
   4   1  -8 31.3916 7.84586   8
  -4  -1   7 299.860 29.6456   7
   4   1  -7 273.396 31.2511   8
  -4  -1   6 395.980 39.8631   7
   4   1  -6 410.602 42.3407   8
  -4  -1   5 78.6441 9.38444   7
   4   1  -5 72.8230 12.6065   8
  -4  -1   4 257.380 25.9132   7
   4   1  -4 269.660 29.6904   8
  -4  -1   4 210.039 28.8799   8
   4   1  -4 262.819 25.8160   1
   4   1  -3 63.7704 15.0934   8
  -4  -1   3 80.9659 11.3459   8
   4   1  -3 85.8980 9.89438   1
  -4  -1   3 92.6638 10.1890   7
   4   1  -2 28.4212 12.1972   8
  -4  -1   2 38.9673 5.43520   8
   4   1  -2 32.9420 4.90334   1
  -4  -1   2 21.2593 4.75456   7
  -4  -1   1 97.5154 11.0820   7
  -4  -1   1 108.478 10.7723   8
   4   1  -1 91.1138 10.6970   1
   4   1  -1 68.4938 15.6352   8
   4   1   0 574.638 64.4386   8
  -4  -1   0 681.778 63.0097   8
  -4  -1   0 672.715 63.3663   7
   4   1   0 642.229 62.9352   1
   4   1   1 50.5067 6.43579   1
   4   1   1 60.0067 7.12227   8
  -4  -1  -1 43.8853 6.70833   7
   4   1   1 52.8665 6.87949   7
   4   1   2 592.556 58.3387   1
   4   1   2 599.271 58.7039   7
  -4  -1  -2 598.653 58.8341   7
   4   1   2 627.576 58.6003   8
   4   1   3 75.7595 9.02633   7
   4   1   3 70.3545 8.97658   8
   4   1   3 78.2370 8.71529   1
  -4  -1  -3 82.1724 8.76607   1
  -4  -1  -3 83.5660 9.42072   7
   4   1   4 572.168 55.9008   1
  -4  -1  -4 553.743 56.3661   7
  -4  -1  -4 604.493 55.9549   1
  -4  -1  -5 27.9951 3.92756   1
  -4  -1  -5 24.1421 4.42531   7
   4   1   5 22.5513 3.77687   1
  -4  -1  -6 404.178 39.5281   1
   4   1   6 417.147 39.5952   1
  -4  -1  -6 392.224 40.0789   7
  -4  -1  -7 3455.16 302.478   2
  -4  -1  -7 3160.32 299.074   1
   4   1   7 3088.68 299.106   1
  -4  -1  -7 3114.83 299.672   7
  -4  -1  -8 23.1685 3.68944   1
  -4  -1  -8 27.4721 4.65598   7
   4   1   8 21.3485 3.74589   1
  -4  -1  -8 26.2641 7.73855   2
  -4  -1  -9 212.539 22.4514   7
  -4  -1  -9 228.336 25.3504   2
   4   1   9 214.844 21.7510   1
  -4  -1 -10 95.6315 11.1470   7
  -4  -1 -10 75.6899 13.3325   2
   4   1  10 98.7250 10.4230   1
  -4  -1 -11 6.85187 6.38897   2
   4   1  11 3.44520 2.38446   1
  -4  -1 -11 3.77135 3.03102   7
   4   1  12 0.36185 2.24899   1
  -4  -1 -12-1.70146 3.27913   7
  -4  -1 -13 15.7943 7.51218   2
   4   1  13 12.9078 3.08708   1
  -4  -1 -13 13.6994 4.04543   7
  -4  -1 -14 17.4307 6.98930   2
   4   1  14 5.92545 2.66335   1
  -4  -1 -14 7.50593 3.52164   7
   4   1  15 360.148 35.7457   1
  -4  -1 -15 347.367 36.5982   7
  -4  -1 -15 386.445 39.8667   2
  -4  -1 -16 1.31531 6.51235   2
   4   1  16 1.69909 2.34423   1
  -4  -1 -16-2.06400 4.19300   7
  -4  -1 -17 5.35232 6.42318   2
   4   1  17 1.31485 2.42414   1
  -4  -1 -17 1.43652 3.55987   7
  -4  -1 -18-2.73859 6.48559   2
   4   1  18 6.34110 2.91679   1
  -4  -1 -18 7.48760 4.01301   7
   4   1  19 345.115 33.7607   1
  -4  -1 -19 317.524 34.8010   7
  -4  -1 -19 341.153 37.7606   2
  -4  -1 -20-1.63079 3.78752   7
  -4  -1 -20-1.41245 6.77971   2
  -4  -1 -21 79.8045 10.7075   7
  -4  -1 -21 56.1630 12.7329   2
  -4  -1 -22 20.3245 5.96597   7
  -4  -1 -22 38.1091 9.97940   2
  -4  -1 -23 44.1332 8.10967   7
  -4  -1 -24 63.1102 10.0066   7
  -4  -1 -25 8.94838 5.06793   7
  -4  -1 -26-1.03387 4.79961   7
  -4  -1 -27 27.9335 7.12074   7
  -4  -1 -28-1.11654 5.18342   7
  -4  -1 -29-2.31963 5.57002   7
  -4  -1 -30-2.40864 5.29764   7
  -4  -1 -31 26.2621 7.49145   7
  -4  -2  30 25.9438 10.0783   1
  -4  -2  29 3.35384 8.55649   1
   4   2 -28 1.38501 5.06623   7
   4   2 -27 4.00644 5.99294   7
   4   2 -26-1.29058 6.19443   7
   4   2 -25 25.2462 7.44394   7
   4   2 -24 6.11294 5.70389   7
   4   2 -23-1.19654 5.92538   7
   4   2 -22 160.204 20.0033   7
   4   2 -21 26.7809 7.00246   7
   4   2 -20 4.06791 4.65403   7
   4   2 -19 3.87321 4.43128   7
   4   2 -18 28.0326 6.38380   7
   4   2 -17 30.8932 6.95672   7
   4   2 -16 3.61731 4.28279   7
   4   2 -15 83.0929 11.4823   7
   4   2 -14 24.4012 5.73096   7
   4   2 -13 18.4410 4.99689   7
   4   2 -12 21.2520 5.01810   7
   4   2 -11 73.2260 9.96175   7
   4   2 -10 194.665 21.2213   7
   4   2  -9 42.7611 9.67671   8
   4   2  -9 65.7197 8.41251   7
   4   2  -8 301.138 31.2124   7
   4   2  -8 305.097 33.4089   8
   4   2  -7 450.403 49.4005   2
  -4  -2   7 543.047 49.3216   7
   4   2  -7 497.144 51.8052   8
   4   2  -6 633.664 65.8108   2
  -4  -2   6 701.252 65.2392   7
   4   2  -6 657.011 68.3263   8
  -4  -2   5 1379.64 131.478   7
   4   2  -5 1348.79 135.191   8
  -4  -2   4 253.560 25.0982   7
   4   2  -4 225.129 29.3720   8
   4   2  -3 261.432 31.7175   8
  -4  -2   3 262.720 26.3674   7
   4   2  -2 570.826 55.9182   1
   4   2  -2 525.326 61.7675   8
  -4  -2   2 555.462 55.7904   7
   4   2  -2 619.473 56.2637   7
  -4  -2   1 20.8820 3.72955   7
   4   2  -1 14.9665 3.67463   7
   4   2  -1 9.45018 11.8649   8
   4   2  -1 17.9688 3.71286   1
   4   2   0 307.435 27.0060   1
   4   2   0 276.091 27.1048   7
  -4  -2   0 246.467 26.7608   7
   4   2   1 156.499 16.5316   1
   4   2   1 139.063 19.9591   8
   4   2   1 173.440 16.7976   7
  -4  -2  -1 159.941 16.6822   7
  -4  -2  -2 903.691 87.0814   2
  -4  -2  -2 868.562 84.2064   1
   4   2   2 880.178 84.2841   1
   4   2   2 875.976 84.4168   7
  -4  -2  -2 867.815 84.4861   7
   4   2   2 913.439 85.8243   8
   4   2   3 408.887 41.1113   7
  -4  -2  -3 393.552 43.7293   2
  -4  -2  -3 399.983 41.2542   7
   4   2   3 421.672 41.8422   8
  -4  -2  -3 442.076 41.0192   1
   4   2   3 440.660 41.0554   1
   4   2   4 208.732 20.5128   7
  -4  -2  -4 207.639 20.3133   1
   4   2   4 210.652 20.3483   1
  -4  -2  -4 187.147 20.5720   7
   4   2   4 197.614 21.0570   8
   4   2   5 155.310 16.9826   7
  -4  -2  -5 157.850 17.2167   7
  -4  -2  -5 175.090 16.8674   1
   4   2   5 174.131 16.8681   1
   4   2   5 169.813 17.7656   8
  -4  -2  -6 16.0647 3.61447   7
   4   2   6 15.5941 3.17559   7
  -4  -2  -6 14.7010 2.85510   1
   4   2   6 23.4073 3.12928   1
  -4  -2  -6 12.7739 7.73889   2
  -4  -2  -7 711.084 68.5517   1
  -4  -2  -7 747.157 72.4481   2
  -4  -2  -7 698.898 69.1447   7
   4   2   7 723.522 68.5812   1
   4   2   8 76.1455 8.45110   1
  -4  -2  -8 76.6450 8.41234   1
  -4  -2  -8 81.6448 9.20742   7
  -4  -2  -8 96.5580 13.2942   2
  -4  -2  -9 283.025 32.0663   2
  -4  -2  -9 278.576 27.6549   1
  -4  -2  -9 305.306 28.6167   7
   4   2   9 275.522 27.6794   1
  -4  -2 -10 3.46861 1.79884   1
  -4  -2 -10-1.24312 6.16604   2
   4   2  10 4.25616 1.90427   1
  -4  -2 -10 5.36867 2.80522   7
  -4  -2 -11 130.614 13.7136   1
  -4  -2 -11 144.187 18.4857   2
   4   2  11 138.235 13.8253   1
  -4  -2 -11 133.268 14.7308   7
  -4  -2 -12 94.7942 10.0216   1
  -4  -2 -12 96.0937 11.1349   7
  -4  -2 -12 85.0295 14.1044   2
   4   2  12 94.8006 10.1233   1
  -4  -2 -13 20.9913 3.27554   1
  -4  -2 -13 17.5457 4.31050   7
   4   2  13 21.2453 3.46636   1
  -4  -2 -13 17.7662 8.21530   2
  -4  -2 -14 4.42226 1.97257   1
   4   2  14 3.31485 2.13046   1
  -4  -2 -14 9.54920 3.58866   7
  -4  -2 -15 1.44550 7.06560   2
   4   2  15 9.62738 2.49407   1
  -4  -2 -15 0.59212 3.14479   7
  -4  -2 -16 62.4069 13.0414   2
   4   2  16 78.0923 8.61868   1
  -4  -2 -16 70.7330 9.52630   7
  -4  -2 -17 85.2219 14.4475   2
   4   2  17 75.0559 8.96832   1
  -4  -2 -17 80.1185 10.2292   7
  -4  -2 -18 40.6436 11.0859   2
  -4  -2 -18 45.7133 7.41344   7
  -4  -2 -19 27.0980 9.67279   2
  -4  -2 -19 37.1560 6.59632   7
  -4  -2 -20-1.62241 7.66035   2
  -4  -2 -20-1.49623 3.81734   7
  -4  -2 -21 40.9597 11.1521   2
  -4  -2 -21 47.6600 7.85910   7
  -4  -2 -22 8.33916 8.58616   2
  -4  -2 -22 13.8850 5.01860   7
  -4  -2 -23 45.5275 11.8402   2
  -4  -2 -23 51.1224 8.36101   7
  -4  -2 -24 227.535 25.2525   7
  -4  -2 -25 0.92645 4.22615   7
  -4  -2 -26 2.89260 4.24627   7
  -4  -2 -27 4.01851 5.06317   7
  -4  -2 -28 3.13434 4.68843   7
  -4  -2 -29 10.8831 5.94751   7
  -4  -2 -30 28.3066 7.40139   7
  -4  -2 -31 23.5626 7.98337   7
  -4  -2 -32-7.35659 6.01827   7
  -4  -3  29 44.7020 12.1857   1
  -4  -3  28 25.8772 9.36288   1
   4   3 -28 16.4478 7.71207   7
  -4  -3  27 23.3904 9.36810   1
   4   3 -27 14.4936 6.82584   7
   4   3 -26 19.0015 7.77470   7
   4   3 -25 7.29613 5.68606   7
   4   3 -24 56.1189 10.3121   7
   4   3 -23 56.2911 10.4996   7
   4   3 -22 7.67719 5.87207   7
   4   3 -21 3.17418 4.92005   7
   4   3 -20-4.12614 4.88522   7
   4   3 -19 121.906 15.8602   7
   4   3 -18 0.91867 4.54933   7
   4   3 -17 33.9968 6.93918   7
   4   3 -16 100.566 13.0522   7
   4   3 -15 69.6514 9.87468   7
   4   3 -14 35.2828 6.64834   7
   4   3 -13 213.895 23.3462   7
   4   3 -12 7.86724 4.15601   7
   4   3 -11 204.582 22.1302   7
   4   3 -10 656.727 66.0953   2
   4   3 -10 717.856 69.7428   8
   4   3 -10 672.497 66.2598   7
   4   3  -9 554.444 58.6003   2
   4   3  -9 618.891 62.0144   8
   4   3  -9 624.166 58.6799   7
   4   3  -8 305.212 32.6526   2
   4   3  -8 335.246 35.9602   8
   4   3  -8 319.473 32.2966   7
   4   3  -7 702.391 70.6378   2
   4   3  -7 780.519 73.9556   8
   4   3  -7 706.299 69.8936   7
   4   3  -6 316.486 33.8394   2
   4   3  -6 345.285 37.3417   8
   4   3  -6 323.772 32.7750   7
   4   3  -5 1242.97 123.081   2
   4   3  -5 1265.13 121.840   7
   4   3  -5 1335.80 126.550   8
  -4  -3   4 147.285 15.2592   7
   4   3  -4 127.911 20.5173   8
   4   3  -3 41.8023 6.46712   7
   4   3  -3 48.1335 13.4277   8
  -4  -3   3 59.5761 6.50481   7
  -4  -3   2 1316.24 125.556   2
   4   3  -2 1075.12 128.698   8
  -4  -3   2 1287.86 123.334   7
   4   3  -2 1334.46 123.655   7
  -4  -3   1 1190.11 115.945   2
   4   3  -1 1274.13 113.957   7
  -4  -3   1 1151.79 113.540   7
   4   3  -1 1014.68 119.888   8
   4   3   0 318.632 38.9402   8
  -4  -3   0 311.802 32.6792   2
   4   3   0 318.996 29.9907   7
  -4  -3   0 285.649 29.5992   7
  -4  -3  -1 29.2983 7.58337   2
   4   3   1 8.17918 12.7084   8
   4   3   1 21.8333 3.55572   7
  -4  -3  -1 15.3226 3.18251   7
  -4  -3  -2 4.61116 2.28352   1
   4   3   2 12.3727 9.70826   8
  -4  -3  -2 12.9413 6.59624   2
   4   3   2 1.00169 1.92629   7
  -4  -3  -2 2.48344 1.92259   7
  -4  -3  -3 68.6720 8.30912   7
   4   3   3 82.4416 8.44830   1
  -4  -3  -3 81.0364 8.40606   1
  -4  -3  -3 93.5087 12.7439   2
   4   3   3 69.1489 8.13277   7
  -4  -3  -4 515.961 49.4756   1
   4   3   4 546.513 49.6051   1
  -4  -3  -4 535.441 53.4089   2
   4   3   4 487.274 49.3829   7
  -4  -3  -4 503.441 49.6580   7
  -4  -3  -5 147.239 13.9942   1
   4   3   5 146.096 14.0349   1
   4   3   5 132.076 13.9196   7
  -4  -3  -5 123.100 14.1536   7
   4   3   6 287.788 27.1315   1
  -4  -3  -6 288.759 27.1027   1
  -4  -3  -6 263.740 27.4146   7
   4   3   6 265.188 27.1577   7
   4   3   7 267.982 27.1663   7
   4   3   7 249.173 28.1940   8
  -4  -3  -7 285.446 26.9484   1
   4   3   7 285.012 26.9551   1
  -4  -3  -7 275.645 27.4297   7
  -4  -3  -8 29.0487 4.59422   7
   4   3   8 33.1839 4.33153   7
   4   3   8 29.9373 3.87249   1
  -4  -3  -8 29.3398 9.17764   2
  -4  -3  -8 33.1156 3.89549   1
   4   3   8 34.1707 5.83540   8
   4   3   9 183.858 18.0065   1
  -4  -3  -9 172.905 22.9529   2
  -4  -3  -9 182.282 18.8318   7
  -4  -3  -9 183.604 18.0079   1
  -4  -3 -10 19.7047 3.81929   7
  -4  -3 -10 18.9314 2.78388   1
   4   3  10 24.6197 2.93388   1
  -4  -3 -10 14.3437 7.97165   2
   4   3  11 648.858 61.3609   1
  -4  -3 -11 679.665 62.5170   7
  -4  -3 -11 626.636 66.7651   2
  -4  -3 -11 624.688 61.3346   1
   4   3  12 568.739 53.5801   1
  -4  -3 -12 538.543 53.5500   1
  -4  -3 -12 551.415 59.2105   2
  -4  -3 -12 601.148 54.8707   7
  -4  -3 -13 29.9784 3.97028   1
   4   3  13 38.4997 4.13255   1
  -4  -3 -13 25.2409 10.1447   2
  -4  -3 -13 39.6344 5.59613   7
  -4  -3 -14 235.342 22.5658   7
  -4  -3 -14 177.609 26.3097   2
   4   3  14 211.974 21.0408   1
  -4  -3 -15 222.578 21.8038   7
   4   3  15 202.623 20.2452   1
  -4  -3 -15 177.841 25.8084   2
  -4  -3 -16 32.3086 10.6998   2
  -4  -3 -16 15.6832 4.23545   7
  -4  -3 -17 22.7512 9.64765   2
  -4  -3 -17 28.3461 5.35157   7
  -4  -3 -18 3.57830 7.63775   2
  -4  -3 -18 14.3352 4.24292   7
  -4  -3 -19 9.14823 9.30576   2
  -4  -3 -19 16.3709 4.42343   7
  -4  -3 -20 7.43185 9.49654   2
  -4  -3 -20 6.87078 4.02655   7
  -4  -3 -21 77.6757 15.0161   2
  -4  -3 -21 65.5295 9.59026   7
  -4  -3 -22 88.0036 17.1411   2
  -4  -3 -22 104.839 12.8664   7
  -4  -3 -23 44.7663 12.7116   2
  -4  -3 -23 45.0076 7.90728   7
  -4  -3 -24 13.7389 9.91441   2
  -4  -3 -24 9.90679 4.66466   7
  -4  -3 -25-3.96110 9.65634   2
  -4  -3 -25 0.86315 3.93655   7
  -4  -3 -26 64.0442 9.94598   7
  -4  -3 -27 32.0387 6.98236   7
  -4  -3 -28 14.7636 5.27777   7
  -4  -3 -29 31.8465 7.49032   7
  -4  -3 -30 98.4715 14.0772   7
  -4  -3 -31 27.8662 7.47382   7
  -4  -3 -32 9.29243 6.15269   7
  -4  -4  28 14.9792 9.46863   1
   4   4 -28 9.60667 6.00706   7
  -4  -4  27 17.9595 8.70832   1
   4   4 -27 10.5519 6.55086   7
  -4  -4  26 89.9286 14.9380   1
   4   4 -26 59.5017 11.4581   7
  -4  -4  25-5.00981 8.51593   1
   4   4 -25 1.21322 5.72868   7
  -4  -4  24 164.567 20.0845   1
   4   4 -24 110.627 16.6457   7
   4   4 -23 24.5263 7.55512   7
   4   4 -22 7.46817 5.78574   7
   4   4 -21 20.4149 6.63123   7
   4   4 -20 108.470 14.3743   7
   4   4 -19 27.2161 6.96382   7
   4   4 -18 154.945 18.4956   7
   4   4 -17 153.788 18.2668   7
   4   4 -16 24.3859 6.15490   7
   4   4 -15-1.59359 4.00724   7
   4   4 -14 61.1538 9.09011   7
   4   4 -13 226.386 24.3608   7
   4   4 -12 433.455 43.6513   7
   4   4 -11 50.7669 7.47468   7
   4   4 -10 42.2252 6.61874   7
   4   4 -10 50.9583 11.4941   8
   4   4  -9 255.093 26.8913   2
   4   4  -9 269.077 30.3065   8
   4   4  -9 232.833 25.3991   7
   4   4  -8 46.6480 6.96937   7
   4   4  -8 54.2858 9.24957   2
   4   4  -8 45.9858 11.3737   8
   4   4  -7 129.285 16.5345   2
   4   4  -7 132.289 14.4877   7
   4   4  -7 128.916 19.1686   8
   4   4  -6 494.660 47.0575   2
   4   4  -6 463.755 49.6633   8
   4   4  -6 430.727 44.4241   7
   4   4  -5 555.763 55.3346   8
   4   4  -5 493.099 49.2459   7
   4   4  -4 7.11174 9.59404   8
   4   4  -4 7.30694 2.86355   7
  -4  -4   4 7.04630 4.16095   2
  -4  -4   3 36.2611 7.24393   2
   4   4  -3 41.0664 5.42508   7
   4   4  -3 39.0166 5.36795   7
   4   4  -3 62.4643 13.7823   8
  -4  -4   2 775.915 79.6349   2
   4   4  -2 794.108 77.2459   7
   4   4  -2 841.059 77.3720   7
   4   4  -2 716.039 83.0889   8
  -4  -4   1 96.4045 14.8849   2
   4   4  -1 129.854 12.5561   7
   4   4  -1 112.961 12.2750   7
  -4  -4   0 355.081 35.5502   2
   4   4   0 328.363 31.9488   7
  -4  -4   0 318.852 31.7058   7
  -4  -4  -1-2.20858 6.66984   2
   4   4   1 3.03659 1.96804   7
  -4  -4  -1 4.05107 1.73074   7
  -4  -4  -2 154.889 15.6980   7
   4   4   2 155.925 15.7580   7
  -4  -4  -2 151.064 19.9223   2
  -4  -4  -2 172.551 16.3708   1
  -4  -4  -3 775.757 77.7819   7
  -4  -4  -3 881.072 78.3443   1
   4   4   3 819.054 77.7868   7
  -4  -4  -3 844.123 82.6091   2
   4   4   4 51.3012 5.32933   7
   4   4   4 29.4598 12.1002   8
  -4  -4  -4 51.7363 5.82401   1
  -4  -4  -4 44.9281 5.40031   7
  -4  -4  -4 59.4244 10.9242   2
   4   4   5 336.141 31.7646   7
  -4  -4  -5 341.007 32.0674   1
  -4  -4  -5 300.194 36.4671   2
  -4  -4  -5 326.611 31.9298   7
   4   4   5 263.808 35.1947   8
  -4  -4  -6 118.206 11.0382   1
  -4  -4  -6 86.1636 15.8336   2
   4   4   6 103.223 10.8272   7
  -4  -4  -6 100.929 11.0677   7
   4   4   6 119.899 14.0891   8
  -4  -4  -7 65.2564 7.85606   7
   4   4   7 73.9431 7.68617   7
  -4  -4  -7 73.1224 7.57154   1
   4   4   7 85.0345 10.2050   8
   4   4   8 48.2377 7.13966   8
  -4  -4  -8 44.9618 4.78762   1
  -4  -4  -8 41.5708 5.35525   7
   4   4   8 41.6341 5.10505   7
   4   4   9 18.6824 4.84332   8
  -4  -4  -9 36.3104 9.78935   2
  -4  -4  -9 22.8055 2.79120   1
   4   4   9 28.1757 3.65130   7
  -4  -4  -9 24.3071 3.82469   7
  -4  -4 -10 7.76806 2.37795   7
  -4  -4 -10 8.17042 7.85978   2
   4   4  10 9.56337 2.40660   7
   4   4  10 9.42337 3.82762   8
  -4  -4 -10 4.64075 0.99864   1
  -4  -4 -11 124.444 18.0686   2
  -4  -4 -11 112.617 12.1348   7
   4   4  11 107.162 13.3120   8
  -4  -4 -12 128.047 19.7228   2
  -4  -4 -12 136.047 14.5599   7
   4   4  12 140.594 15.8647   8
  -4  -4 -13 270.617 32.4970   2
  -4  -4 -13 264.326 26.8663   7
  -4  -4 -14 823.416 90.2463   2
  -4  -4 -14 893.504 85.0015   7
  -4  -4 -15 74.9789 14.8588   2
  -4  -4 -15 71.0635 8.79876   7
  -4  -4 -16-1.91838 9.06208   2
  -4  -4 -16 4.03363 2.80163   7
  -4  -4 -17 7.83644 8.77389   2
  -4  -4 -17-0.53608 3.09949   7
  -4  -4 -18 94.0590 16.7579   2
  -4  -4 -18 77.7189 10.0122   7
  -4  -4 -19 12.2828 9.34953   2
  -4  -4 -19 20.9636 4.69204   7
  -4  -4 -20-10.4095 10.3087   2
  -4  -4 -20 3.15577 3.22080   7
  -4  -4 -21 4.25743 9.16095   2
  -4  -4 -21 22.6049 4.98061   7
  -4  -4 -22 41.1134 13.1331   2
  -4  -4 -22 30.0451 6.19490   7
  -4  -4 -23-4.42421 11.1300   2
  -4  -4 -23 8.07154 4.22881   7
  -4  -4 -24 29.2036 12.1261   2
  -4  -4 -24 7.70080 3.97729   7
  -4  -4 -25 22.8079 12.4010   2
  -4  -4 -25 17.7723 5.54159   7
  -4  -4 -26 115.612 20.6712   2
  -4  -4 -26 98.9711 13.3888   7
  -4  -4 -27 24.8156 5.88894   7
  -4  -4 -28 18.5579 5.97477   7
   4   5 -27 1.32940 5.27955   7
  -4  -5  27 23.5053 10.4216   1
   4   5 -26-1.27767 5.72236   7
  -4  -5  26 5.67472 9.36568   1
   4   5 -25 116.526 17.2112   7
  -4  -5  25 151.248 21.2102   1
   4   5 -24 2.35440 5.27271   7
  -4  -5  24-1.75092 7.54590   1
   4   5 -23 9.03688 6.22911   7
  -4  -5  23 11.7244 8.59208   1
   4   5 -22-2.16198 5.01733   7
  -4  -5  22 6.44766 7.85902   1
   4   5 -21 23.6923 6.65686   7
  -4  -5  21 48.1613 10.5852   1
   4   5 -20 10.8062 5.44055   7
  -4  -5  20 8.97099 7.35285   1
   4   5 -19 9.36486 5.30532   7
   4   5 -18 9.80935 5.29474   7
   4   5 -17 6.77436 4.17800   7
   4   5 -16-0.80373 4.21439   7
   4   5 -15 438.888 44.6696   7
   4   5 -14 34.6597 6.51914   7
   4   5 -13 163.338 18.4057   7
   4   5 -12 6.50207 3.68351   7
   4   5 -11 307.194 31.6581   7
   4   5 -10 7.47352 3.62922   7
   4   5 -10 14.5109 8.45742   8
   4   5  -9 106.048 12.1892   7
   4   5  -9 94.6561 17.3188   8
   4   5  -8 39.4135 6.19423   7
   4   5  -8 51.8442 11.9775   8
   4   5  -7 140.821 15.8471   7
   4   5  -7 188.340 22.8396   8
   4   5  -6 3.66426 2.48774   7
   4   5  -6-1.83103 8.93600   8
  -4  -5   6 6.84237 3.84105   2
  -4  -5   5 96.6007 12.9701   2
   4   5  -5 98.9301 10.9215   7
   4   5  -4 4.51696 2.30714   7
  -4  -5   4 2.72449 4.30374   2
   4   5  -3 6.48548 2.21489   7
  -4  -5   3 7.91128 4.84629   2
   4   5  -3 3.67190 2.00812   7
   4   5  -2 20.5858 3.26613   7
  -4  -5   2 19.2908 6.57971   2
   4   5  -2 22.5435 3.51150   7
   4   5  -1 33.1117 4.09481   7
  -4  -5   1 29.9025 7.66314   2
   4   5  -1 32.8470 4.35731   7
   4   5   0 25.6394 3.14784   7
  -4  -5   0 22.0777 7.27921   2
   4   5   0 20.8010 13.0994   8
   4   5   0 21.0197 3.36639   7
   4   5   1 12.4815 2.03732   7
   4   5   1-2.49084 13.2778   8
  -4  -5  -1 7.78700 6.41886   2
   4   5   1 11.0460 1.82339   7
   4   5   2 45.1096 16.0965   8
   4   5   2 52.5834 5.28383   7
  -4  -5  -2 34.3405 10.0407   2
   4   5   2 51.4960 5.27773   7
  -4  -5  -3 14.4552 7.56572   2
   4   5   3 38.3702 17.6015   8
   4   5   4-5.40911 13.1875   8
  -4  -5  -4 1.89405 1.75435   1
  -4  -5  -4 4.53635 7.14059   2
   4   5   5 162.606 31.2458   8
  -4  -5  -5 241.669 29.7905   2
  -4  -5  -5 252.996 24.0983   1
   4   5   6-1.77291 8.92491   8
  -4  -5  -6 1.62384 7.29064   2
  -4  -5  -6 5.97086 1.76071   1
   4   5   7 44.0652 4.91656   7
   4   5   7 33.0705 10.0374   8
  -4  -5  -7 45.0537 4.98709   7
  -4  -5  -7 40.3040 11.3969   2
  -4  -5  -7 51.8575 5.22503   1
   4   5   8 51.2824 5.24905   7
  -4  -5  -8 50.3399 5.00959   1
   4   5   8 41.9630 8.64358   8
  -4  -5  -8 44.0939 5.23533   7
  -4  -5  -8 41.5800 4.89374   1
  -4  -5  -9 73.6961 7.95851   7
   4   5   9 75.1547 7.96569   7
   4   5   9 67.2070 10.4541   8
  -4  -5 -10 117.319 12.1519   7
   4   5  10 114.697 14.3650   8
  -4  -5 -11 83.3079 16.3812   2
  -4  -5 -11 94.7665 10.3446   7
   4   5  11 102.943 12.2585   8
  -4  -5 -12 5.83296 7.90926   2
   4   5  12 10.0100 4.31550   8
  -4  -5 -12 9.43161 2.82904   7
  -4  -5 -13 169.820 16.6699   7
  -4  -5 -13 138.709 22.6278   2
   4   5  13 145.235 18.0807   8
   4   5  14 28.5140 6.21926   8
  -4  -5 -14 31.9163 4.73567   7
  -4  -5 -14 16.2914 10.4622   2
   4   5  15 28.0436 6.26172   8
  -4  -5 -15 25.6010 4.64380   7
  -4  -5 -15 45.7492 12.8135   2
   4   5  16 5.84512 4.32632   8
  -4  -5 -16 1.35285 2.56248   7
  -4  -5 -16 10.6287 10.3676   2
   4   5  17 36.5606 7.01533   8
  -4  -5 -17 17.3982 10.9283   2
  -4  -5 -17 26.1199 4.90205   7
  -4  -5 -18 15.5571 11.1639   2
  -4  -5 -18 38.6574 5.74402   7
  -4  -5 -19 140.896 22.9484   2
  -4  -5 -19 133.583 15.0803   7
  -4  -5 -20 99.3841 18.9575   2
  -4  -5 -20 97.5444 11.7758   7
  -4  -5 -21 9.46848 10.6019   2
  -4  -5 -21 0.61444 3.22388   7
  -4  -5 -22 4.82373 9.76091   2
  -4  -5 -23 19.7228 11.5937   2
  -4  -5 -24 5.01030 11.0198   2
  -4  -5 -25 20.3779 12.3746   2
  -4  -5 -26-10.3497 11.4132   2
  -4  -5 -27-10.5182 11.1474   2
   4   6 -26 11.7504 5.95174   7
   4   6 -25 13.7967 6.58234   7
  -4  -6  25 7.94453 9.28641   1
   4   6 -24 27.6123 7.54234   7
  -4  -6  24 7.64955 8.91199   1
   4   6 -23 8.06184 5.88779   7
  -4  -6  23 20.2453 9.44650   1
   4   6 -22-2.20459 5.20490   7
  -4  -6  22 1.76825 7.91993   1
   4   6 -21 1.05477 4.81328   7
  -4  -6  21 3.38337 7.43642   1
   4   6 -20-4.02629 5.13276   7
  -4  -6  20 22.7297 9.17609   1
   4   6 -19-0.95988 4.68011   7
  -4  -6  19 4.64768 7.19069   1
   4   6 -18 53.9595 9.25622   7
   4   6 -17 15.6368 5.12753   7
   4   6 -16 101.361 13.2699   7
   4   6 -15 3.90073 3.86807   7
  -4  -6  15-2.58119 7.12545   1
   4   6 -14 35.2676 6.48057   7
   4   6 -13 5.52373 3.93715   7
   4   6 -12 404.426 41.0279   7
   4   6 -11 1.81486 3.26068   7
   4   6 -10 50.6413 12.8991   8
   4   6 -10 32.6087 5.86641   7
   4   6  -9 81.6897 9.48278   7
   4   6  -9 43.9116 13.7748   8
   4   6  -8 192.715 20.1430   7
  -4  -6   8 187.295 21.2176   2
  -4  -6   7 72.0756 10.3927   2
   4   6  -7 68.9206 8.56637   7
  -4  -6   6 0.89947 4.65150   2
   4   6  -6-0.39359 2.11854   7
  -4  -6   5-0.98995 4.53568   2
   4   6  -5 6.32091 2.45992   7
   4   6  -4 6.16589 9.22929   8
  -4  -6   4 7.66735 5.85845   2
   4   6  -4 7.10135 2.50221   7
   4   6  -3 29.6733 11.8584   8
  -4  -6   3 21.3154 7.55888   2
   4   6  -3 29.4275 4.04032   7
  -4  -6   2 3.81299 6.14885   2
   4   6  -2 8.32938 2.08688   7
   4   6  -1 41.8975 13.7478   8
   4   6  -1 40.7683 4.78047   7
  -4  -6   1 54.4849 10.2569   2
  -4  -6   0 47.8523 10.7887   2
   4   6   0 60.5353 6.23703   7
   4   6   0 61.5793 6.41999   7
   4   6   0 36.2631 14.1402   8
   4   6   1 40.9231 14.0197   8
  -4  -6  -1 33.7086 9.29732   2
   4   6   2-2.66507 11.4877   8
  -4  -6  -2 4.80702 7.04636   2
   4   6   3 67.6615 18.5955   8
  -4  -6  -3 61.4212 7.33022   1
  -4  -6  -3 53.6170 12.2334   2
   4   6   4 242.044 38.0416   8
  -4  -6  -4 281.506 27.9513   1
  -4  -6  -4 308.339 34.4028   2
  -4  -6  -5 32.6469 11.0367   2
  -4  -6  -5 29.9365 3.97670   1
  -4  -6  -5 24.9595 3.88921   1
   4   6   6 27.2606 15.8833   8
  -4  -6  -6 38.7646 4.87871   1
  -4  -6  -6 43.1804 12.2431   2
  -4  -6  -6 39.8695 4.89661   1
   4   6   7 10.8137 12.6180   8
  -4  -6  -7 3.88756 8.14384   2
  -4  -6  -7 14.8260 2.44483   1
  -4  -6  -8 284.368 36.0736   2
  -4  -6  -8 303.237 28.6380   1
   4   6   8 211.868 35.6247   8
  -4  -6  -9 20.3509 10.9903   2
   4   6   9 21.1858 9.70449   8
   4   6  10 210.036 25.7379   8
   4   6  11 10.4622 6.09234   8
  -4  -6 -12 63.4311 17.2277   2
   4   6  12 146.314 15.5908   8
  -4  -6 -13 136.844 22.6043   2
   4   6  13 150.915 17.7616   8
  -4  -6 -14 4.55334 9.81524   2
   4   6  14 2.63076 4.66764   8
  -4  -6 -15 92.5449 21.3751   2
   4   6  15 167.042 17.7251   8
   4   6  16 8.61522 4.80395   8
  -4  -6 -16 2.35493 9.54484   2
   4   6  17 8.88294 5.40557   8
  -4  -6 -17 2.40023 10.1592   2
   4   6  18 21.2768 6.03134   8
  -4  -6 -18 12.2450 10.9160   2
   4   6  19 37.4478 8.07091   8
  -4  -6 -19 25.0131 12.4268   2
  -4  -6 -20 5.08085 10.5022   2
   4   6  20-2.99175 5.30114   8
  -4  -6 -21 28.6312 13.1099   2
   4   6  21 6.22565 5.21080   8
  -4  -6 -22 7.94237 11.4268   2
   4   6  22 6.46822 5.45516   8
  -4  -6 -23 5.42429 13.6497   2
   4   6  23 32.6147 8.07393   8
  -4  -6 -24 22.0913 12.6937   2
   4   6  24 15.2371 7.03331   8
  -4  -6 -25 14.0762 12.1591   2
   4   6  25 7.31570 5.81253   8
  -4  -6 -26 17.1789 12.3994   2
   4   6  26 11.4209 7.59787   8
  -4  -6 -27 5.82101 13.2807   2
   4   6  27 36.9825 9.03527   8
  -4  -6 -28-8.87686 14.2378   2
   4   6  28 19.2053 7.55042   8
   4   7 -25 49.5730 10.6298   7
  -4  -7  24-2.06916 8.75207   1
   4   7 -24-6.26121 7.49542   7
  -4  -7  23 4.00084 8.62257   1
   4   7 -23 1.20019 5.17527   7
  -4  -7  22 13.4997 9.12802   1
   4   7 -22 4.59716 5.55461   7
  -4  -7  21 62.9411 14.9594   1
   4   7 -21 75.7428 11.6999   7
   4   7 -20 10.4747 5.58010   7
   4   7 -19 48.9082 8.97713   7
   4   7 -18 54.1138 9.40444   7
  -4  -7  17 184.523 21.4424   1
   4   7 -17 126.524 17.1276   7
  -4  -7  16 116.736 16.0620   1
   4   7 -16 83.8578 12.3033   7
  -4  -7  15-5.61716 7.16456   1
   4   7 -15-1.61666 3.62818   7
  -4  -7  14 31.9497 9.32570   1
   4   7 -14 29.0152 6.39496   7
  -4  -7  13 10.0865 7.11418   1
   4   7 -13 17.9744 4.70785   7
  -4  -7  12 33.3369 8.29401   1
   4   7 -12 24.9412 5.56469   7
  -4  -7  11 81.9720 12.1429   1
   4   7 -11 65.4723 9.45832   7
  -4  -7  10 4.24100 5.08849   1
   4   7 -10-0.58638 3.23698   7
  -4  -7   9 17.9919 6.37636   1
   4   7  -9 10.3151 3.71516   7
   4   7  -8-6.48348 9.67947   8
  -4  -7   8-0.93697 4.56976   1
   4   7  -8 2.99195 2.91728   7
  -4  -7   7 8.79201 5.04696   1
  -4  -7   7 11.5621 6.09094   2
   4   7  -7 16.8567 3.73567   7
  -4  -7   6 70.7983 10.2045   1
  -4  -7   6 56.7944 11.1181   2
   4   7  -6 64.6507 15.0829   8
   4   7  -6 70.8191 8.30097   7
   4   7  -5 102.074 20.0752   8
   4   7  -5 127.137 14.1200   7
  -4  -7   5 158.894 16.3240   1
  -4  -7   5 136.638 17.9767   2
  -4  -7   4 62.5268 9.19114   1
   4   7  -4 67.8298 7.57936   7
  -4  -7   4 48.2389 11.0276   2
   4   7  -4 58.7626 15.2575   8
  -4  -7   3-7.03241 7.95074   2
  -4  -7   3 6.70028 4.04557   1
   4   7  -3 2.20698 9.88526   8
   4   7  -2 241.630 32.3329   8
  -4  -7   2 259.429 26.0651   1
  -4  -7   2 219.656 29.0559   2
  -4  -7   1 24.0655 9.16824   2
  -4  -7   1 19.7325 4.41722   1
   4   7  -1 20.7925 11.2543   8
   4   7   0 107.945 21.6265   8
  -4  -7   0 125.623 18.9888   2
  -4  -7   0 133.916 14.4796   1
   4   7   1 131.155 25.0765   8
  -4  -7  -1 190.992 19.1362   1
  -4  -7  -1 176.195 24.0018   2
  -4  -7  -2 1.37581 2.40972   1
  -4  -7  -2 5.59194 8.65301   2
   4   7   2 2.49910 11.7987   8
  -4  -7  -3 104.797 11.4352   1
  -4  -7  -3 87.9017 17.0414   2
   4   7   3 95.0303 21.0353   8
  -4  -7  -4 9.40799 2.84304   1
  -4  -7  -4 2.02061 9.24862   2
   4   7   4-2.92458 13.5968   8
  -4  -7  -5 59.8800 7.13436   1
  -4  -7  -5 56.4213 14.7285   2
   4   7   5 65.3476 18.6690   8
   4   7   6-9.74142 16.5592   8
  -4  -7  -6 6.48027 9.67739   2
  -4  -7  -6 2.88331 1.95788   1
  -4  -7  -7 29.0276 12.3083   2
   4   7   7 3.36985 15.7475   8
  -4  -7  -8 11.3882 10.2540   2
   4   7   8 10.2513 16.1652   8
  -4  -7  -9 44.1786 13.8027   2
   4   7   9 32.3914 16.2237   8
  -4  -7 -10 140.154 21.6841   2
   4   7  10 64.1945 19.5402   8
  -4  -7 -11 63.1391 16.1613   2
   4   7  11 75.5571 17.7608   8
   4   7  12 70.9997 15.1154   8
   4   7  13 10.5849 9.42627   8
  -4  -7 -14 45.7543 14.9980   2
   4   7  14 61.8844 11.7395   8
  -4  -7 -15 5.21821 11.1070   2
   4   7  15 18.9414 7.19365   8
  -4  -7 -16-10.5834 12.0798   2
   4   7  16-4.65069 6.20256   8
  -4  -7 -17 104.754 22.1989   2
   4   7  17 136.346 16.9851   8
  -4  -7 -18 13.6563 12.0210   2
   4   7  18 5.37638 5.75017   8
  -4  -7 -19 46.7607 16.5793   2
   4   7  19 65.3398 10.4055   8
  -4  -7 -20 14.0333 11.6146   2
   4   7  20 4.20631 5.31414   8
  -4  -7 -21 59.6533 18.1823   2
   4   7  21 85.0487 12.4069   8
  -4  -7 -22-2.90630 12.5680   2
   4   7  22 15.2130 6.36877   8
  -4  -7 -23-5.91036 12.2322   2
   4   7  23 10.1053 5.67956   8
  -4  -7 -24 6.06099 12.8078   2
   4   7  24 5.79905 6.26715   8
  -4  -7 -25 95.6479 23.9100   2
   4   7  25 146.740 18.2441   8
  -4  -7 -26-6.28173 12.9963   2
  -4  -7 -27-16.0088 13.6035   2
  -4  -7 -28 6.52976 14.0833   2
  -4  -7 -29-3.31145 14.5565   2
  -4  -8  19-3.67315 9.23648   1
  -4  -8  18 10.5525 8.22380   1
  -4  -8  17 45.3889 12.2749   1
  -4  -8  16-4.81821 7.96497   1
  -4  -8  15 119.209 17.8784   1
  -4  -8  14 5.80505 6.64147   1
  -4  -8  13 28.9616 9.07642   1
  -4  -8  12 5.21582 5.96735   1
  -4  -8  11 12.3431 6.48884   1
  -4  -8  10 4.66436 5.96222   1
  -4  -8   9 101.218 14.0528   1
   4   8  -9 85.6359 18.6576   8
  -4  -8   8 15.5442 6.19940   1
   4   8  -8-2.33517 10.6940   8
  -4  -8   7 0.97430 4.75033   1
   4   8  -7-4.60703 10.5056   8
  -4  -8   6 51.3670 8.67939   1
   4   8  -6 34.4779 13.2925   8
  -4  -8   5 9.96027 7.58378   2
  -4  -8   5 4.30763 4.73458   1
   4   8  -5 9.18134 9.71041   8
  -4  -8   4-1.53461 7.25359   2
  -4  -8   4 7.27361 4.52874   1
   4   8  -4 2.30604 9.94434   8
   4   8  -3 149.569 26.5147   8
  -4  -8   3 187.957 24.9049   2
  -4  -8   3 206.951 21.4816   1
   4   8  -2 121.393 20.7097   8
  -4  -8   2 118.664 14.1213   1
  -4  -8   2 107.342 18.0537   2
  -4  -8   1 89.0620 11.3425   1
   4   8  -1 84.9364 18.3032   8
  -4  -8   1 105.426 17.0441   2
  -4  -8   0 74.1828 9.45483   1
   4   8   0 62.8495 15.9570   8
  -4  -8   0 70.5351 14.7437   2
  -4  -8  -1 28.7296 5.28144   1
   4   8   1 34.6438 13.4166   8
  -4  -8  -1 22.5945 10.2131   2
  -4  -8  -2 11.9520 3.63956   1
   4   8   2 10.0473 10.6628   8
  -4  -8  -2 10.7602 8.57073   2
  -4  -8  -3 33.6358 5.37706   1
   4   8   3 41.1295 14.4022   8
  -4  -8  -3 44.4557 13.1364   2
  -4  -8  -4 12.9637 3.48954   1
  -4  -8  -4 2.32413 9.66995   2
   4   8   4 10.8224 11.2379   8
  -4  -8  -5 120.538 20.6810   2
   4   8   5 102.112 22.0315   8
  -4  -8  -6 87.1331 18.2408   2
   4   8   6 72.8591 20.4053   8
  -4  -8  -7 2.47904 11.9094   2
   4   8   7 13.2245 13.6771   8
  -4  -8  -8 5.04837 11.0954   2
   4   8   8-3.51454 16.0302   8
  -4  -8  -9 2.57209 11.5192   2
   4   8   9-3.67054 17.0366   8
  -4  -8 -10 26.2360 12.7412   2
   4   8  10 7.59017 19.4498   8
  -4  -8 -11 34.8180 13.4097   2
   4   8  11 26.7215 19.4255   8
  -4  -8 -12 21.7546 13.4764   2
   4   8  12-10.9731 17.2769   8
   4   8  13 20.5621 16.5601   8
   4   8  14 20.9809 14.5194   8
  -4  -8 -15 2.90431 12.2690   2
   4   8  15 5.33890 12.8158   8
  -4  -8 -16 55.9050 16.5560   2
   4   8  16 47.1832 14.8908   8
  -4  -8 -17 190.885 27.7964   2
[truncated: 338,695 more chars]
